# Supplementary material for: Expression profiles of circular RNAs and interaction networks of competing endogenous RNAs in neurogenic bladder of rats following suprasacral spinal cord injury
Source: PeerJ. 2023 Sep 18;11:e16042. doi: 10.7717/peerj.16042 (PMC10512963; doi:10.7717/peerj.16042)
Supplement: Supplemental Information 11 [file peerj-11-16042-s011.xlsx]

## Sheet: FPKM_anno
gene_id	Sham–1	Sham–2	Sham–3	SSCI 1–1	SSCI 1–2	SSCI 1–3	SSCI 2–1	SSCI 2–2	SSCI 2–3	SSCI 3–1	SSCI 3–2	SSCI 3–3	Dbxref	product	GO_id	GO_term	pathway	pathway_description
A1bg	0	0	0	0	0	0	0	0	0	0	0	0	GeneID:140656,Genbank:NM_022258.2,RGD:69417	alpha-1-B glycoprotein	GO:0008150,GO:0031012,GO:0003674,GO:0005576	biological_process|extracellular matrix|molecular_function|extracellular region
A1cf	0	0	0.0118779	0.0433539	0.00510121	0.00446236	0	0.00467973	0	0	0	0	GeneID:170912,Genbank:XM_006231272.3,RGD:619834	APOBEC1 complementation factor	GO:0016556,GO:0007566,GO:0003727,GO:0030895,GO:0010609,GO:0003729,GO:0005515,GO:0005634,GO:0005654,GO:0005720,GO:0045293,GO:0016554,GO:0005737,GO:0050821,GO:0003725,GO:0005783,GO:0006397	mRNA modification|embryo implantation|single-stranded RNA binding|apolipoprotein B mRNA editing enzyme complex|mRNA localization resulting in posttranscriptional regulation of gene expression|mRNA binding|protein binding|nucleus|nucleoplasm|nuclear heterochromatin|mRNA editing complex|cytidine to uridine editing|cytoplasm|protein stabilization|double-stranded RNA binding|endoplasmic reticulum|mRN…
A2m	8.8247	9.05677	8.674	12.5249	9.65098	16.2708	7.73302	15.5732	8.95036	4.03451	3.88312	5.40767	GeneID:24153,Genbank:NM_012488.2,RGD:2004	alpha-2-macroglobulin	GO:0051384,GO:0019966,GO:0002438,GO:1990402,GO:0034695,GO:0004866,GO:0042803,GO:0004867,GO:0005102,GO:0005615,GO:0006953,GO:0007584,GO:0043120,GO:0009611,GO:0048306,GO:0010037,GO:0048403,GO:0010951,GO:0048406,GO:0019838,GO:0001553,GO:0048863,GO:0019899,GO:0001869,GO:0051289,GO:0019959,GO:0002020	response to glucocorticoid|interleukin-1 binding|acute inflammatory response to antigenic stimulus|embryonic liver development|response to prostaglandin E|endopeptidase inhibitor activity|protein homodimerization activity|serine-type endopeptidase inhibitor activity|signaling receptor binding|extracellular space|acute-phase response|response to nutrient|tumor necrosis factor binding|response to w…	rno04610	Complement and coagulation cascades
A2ml1	0.00536209	0.0153684	0.00491201	0.111557	0.0168766	0.14763	0.203188	0.119987	0.14074	0	0.00549744	0.0201038	GeneID:362442,Genbank:XM_008763339.2,RGD:1565709	alpha-2-macroglobulin-like 1	GO:0030414,GO:0052548,GO:0004866,GO:0005615,GO:0010951	peptidase inhibitor activity|regulation of endopeptidase activity|endopeptidase inhibitor activity|extracellular space|negative regulation of endopeptidase activity
A3galt2	40.7287	45.6335	39.8207	63.1291	63.1406	58.2353	67.0228	63.8112	43.5768	32.9829	31.5979	35.2854	GeneID:171553,Genbank:NM_138524.2,RGD:727913	alpha 1,3-galactosyltransferase 2	GO:0046872,GO:0005794,GO:0047276,GO:0005975,GO:0006688,GO:0016021,GO:0016757,GO:0030259,GO:0031982,GO:0001962,GO:0032580,GO:0033580	metal ion binding|Golgi apparatus|N-acetyllactosaminide 3-alpha-galactosyltransferase activity|carbohydrate metabolic process|glycosphingolipid biosynthetic process|integral component of membrane|transferase activity, transferring glycosyl groups|lipid glycosylation|vesicle|alpha-1,3-galactosyltransferase activity|Golgi cisterna membrane|protein galactosylation at cell surface	rno00603	Glycosphingolipid biosynthesis - globo and isoglobo series
A4galt	2.67464	2.13823	3.26896	1.26653	1.41756	1.16849	0.573984	1.69557	1.49133	1.76863	1.31424	1.51976	GeneID:63888,Genbank:NM_022240.2,RGD:621583	alpha 1,4-galactosyltransferase	GO:0007009,GO:0008378,GO:0015643,GO:0016020,GO:0016021,GO:0050512,GO:0000139,GO:0001576,GO:0006486	plasma membrane organization|galactosyltransferase activity|toxic substance binding|membrane|integral component of membrane|lactosylceramide 4-alpha-galactosyltransferase activity|Golgi membrane|globoside biosynthetic process|protein glycosylation	rno00601,rno00603	Glycosphingolipid biosynthesis - lacto and neolacto series|Glycosphingolipid biosynthesis - globo and isoglobo series
A4gnt	0	0	0	0.00985755	0	0	0	0.00957643	0.0596942	0	0	0	GeneID:685758,Genbank:XM_008766588.2,RGD:1590210	alpha-1,4-N-acetylglucosaminyltransferase	GO:0008150,GO:0008375,GO:0009101,GO:0050680,GO:0003674,GO:0005575,GO:0006493	biological_process|acetylglucosaminyltransferase activity|glycoprotein biosynthetic process|negative regulation of epithelial cell proliferation|molecular_function|cellular_component|protein O-linked glycosylation
Aaas	7.33792	6.67027	5.79	9.72333	7.75512	9.49749	12.1148	8.32611	7.5247	5.80356	5.84119	5.60245	GeneID:300259,Genbank:XM_008765705.2,RGD:1308701	aladin WD repeat nucleoporin	GO:0031965,GO:0005643,GO:0005654,GO:0005813,GO:0005829,GO:0006913,GO:0007612,GO:0003674,GO:0008150,GO:0005575,GO:0009566	nuclear membrane|nuclear pore|nucleoplasm|centrosome|cytosol|nucleocytoplasmic transport|learning|molecular_function|biological_process|cellular_component|fertilization	rno03013	RNA transport
Aacs	10.5425	15.9147	13.1129	16.9096	16.5533	14.8388	34.4567	21.2918	13.7408	16.5253	14.1741	12.988	GeneID:65984,Genbank:NM_023104.1,RGD:708522	acetoacetyl-CoA synthetase	GO:0047760,GO:0005829,GO:0050872,GO:0006631,GO:0060612,GO:0007584,GO:0010243,GO:0014070,GO:0014074,GO:0030729,GO:0071333,GO:0071394,GO:0032024,GO:0071397,GO:0034201,GO:0042493,GO:0001889,GO:0042594,GO:0005524,GO:0045471	butyrate-CoA ligase activity|cytosol|white fat cell differentiation|fatty acid metabolic process|adipose tissue development|response to nutrient|response to organonitrogen compound|response to organic cyclic compound|response to purine-containing compound|acetoacetate-CoA ligase activity|cellular response to glucose stimulus|cellular response to testosterone stimulus|positive regulation of insuli…	rno00650,rno00280	Butanoate metabolism|Valine, leucine and isoleucine degradation
Aadac	0	0	0	0	0.0120444	0	0	0	0.0114792	0	0	0	GeneID:57300,Genbank:NM_020538.1,RGD:631440	arylacetamide deacetylase	GO:0017171,GO:0005789,GO:0019213,GO:0006629,GO:0009056,GO:0010898,GO:0031090,GO:0016021,GO:0016787,GO:0004806	serine hydrolase activity|endoplasmic reticulum membrane|deacetylase activity|lipid metabolic process|catabolic process|positive regulation of triglyceride catabolic process|organelle membrane|integral component of membrane|hydrolase activity|triglyceride lipase activity
Aadacl2	0	0.0598426	0	0	0	0	0.0735986	0	0.172235	0.0201869	0	0	GeneID:295076,Genbank:NM_001191706.1,RGD:1563197	arylacetamide deacetylase-like 2	GO:0052689,GO:0009056,GO:0016021,GO:0016787	carboxylic ester hydrolase activity|catabolic process|integral component of membrane|hydrolase activity
Aadacl3	0	0	0	0.0104992	0	0	0	0.0101998	0	0	0.0144871	0	GeneID:313686,Genbank:NM_001191768.1,RGD:1563257	arylacetamide deacetylase-like 3	GO:0052689,GO:0009056,GO:0016021,GO:0016787	carboxylic ester hydrolase activity|catabolic process|integral component of membrane|hydrolase activity
Aadacl4	0	0	0	0	0	0	0	0.0119895	0	0	0	0	GeneID:313688,Genbank:XM_233640.5,RGD:1565761	arylacetamide deacetylase-like 4	GO:0009056,GO:0016021,GO:0016787	catabolic process|integral component of membrane|hydrolase activity
Aadat	0.0355154	0.113102	0.0759133	0.07037	0.00931504	0.0325939	0.0938927	0.085454	0.0443894	0.125905	0.0121373	0.0221926	GeneID:29416,Genbank:XM_006253067.3,RGD:2948	aminoadipate aminotransferase	GO:0047536,GO:0006103,GO:0006536,GO:0070189,GO:0008483,GO:0009058,GO:0016212,GO:0097052,GO:0019441,GO:0030170,GO:0003824,GO:0033512,GO:0005739,GO:0042803	2-aminoadipate transaminase activity|2-oxoglutarate metabolic process|glutamate metabolic process|kynurenine metabolic process|transaminase activity|biosynthetic process|kynurenine-oxoglutarate transaminase activity|L-kynurenine metabolic process|tryptophan catabolic process to kynurenine|pyridoxal phosphate binding|catalytic activity|L-lysine catabolic process to acetyl-CoA via saccharopine|mito…	rno00310,rno00380	Lysine degradation|Tryptophan metabolism
Aaed1	17.4537	17.5429	19.5767	14.4889	13.1026	14.3784	9.83679	16.17	14.5375	17.5763	15.8356	15.9802	GeneID:498685,Genbank:XM_017600640.1,RGD:1589650	AhpC/TSA antioxidant enzyme domain containing 1	GO:0016209,GO:0055114,GO:0098869	antioxidant activity|oxidation-reduction process|cellular oxidant detoxification
Aagab	24.7056	23.7365	24.8234	22.4861	21.571	25.0142	31.2464	23.8137	28.8659	27.3605	29.1658	28.6188	GeneID:171435,Genbank:XM_006243223.2,RGD:621601	alpha- and gamma-adaptin binding protein	GO:0005737,GO:0005829,GO:0008150,GO:0015031,GO:0016607,GO:0003674,GO:0005515,GO:0005575	cytoplasm|cytosol|biological_process|protein transport|nuclear speck|molecular_function|protein binding|cellular_component
Aak1	10.3772	10.9479	10.2783	9.72918	9.52961	9.894	8.97777	9.24962	9.29892	9.65246	10.4538	10.1641	GeneID:500244,Genbank:XM_017592818.1,RGD:1305520	AP2 associated kinase 1	GO:0005905,GO:0006468,GO:0006897,GO:0019897,GO:0045747,GO:0030100,GO:0046777,GO:0031252,GO:0050821,GO:0032880,GO:0071439,GO:2000369,GO:0004672,GO:0004674,GO:0005112,GO:0005524,GO:0005634,GO:0005737,GO:0035612,GO:0043195	clathrin-coated pit|protein phosphorylation|endocytosis|extrinsic component of plasma membrane|positive regulation of Notch signaling pathway|regulation of endocytosis|protein autophosphorylation|cell leading edge|protein stabilization|regulation of protein localization|clathrin complex|regulation of clathrin-dependent endocytosis|protein kinase activity|protein serine/threonine kinase activity|N…
Aamdc	7.81647	7.51934	8.22575	3.03454	4.32015	4.65409	5.02909	3.27989	8.09283	7.79264	9.70525	11.0784	GeneID:361606,Genbank:NM_001108493.1,RGD:1561459	adipogenesis associated, Mth938 domain containing	GO:0045600,GO:0045944,GO:0005737,GO:0043066	positive regulation of fat cell differentiation|positive regulation of transcription by RNA polymerase II|cytoplasm|negative regulation of apoptotic process
Aamp	21.5998	23.5237	21.8997	20.6771	21.2545	23.0346	31.2303	23.784	28.2874	22.7675	25.7562	23.0321	GeneID:301512,Genbank:NM_001106920.1,RGD:1306281	angio-associated, migratory cell protein	GO:0009986,GO:0014909,GO:0015630,GO:0030687,GO:0042273,GO:0045171,GO:0051082,GO:0005829,GO:0008201	cell surface|smooth muscle cell migration|microtubule cytoskeleton|preribosome, large subunit precursor|ribosomal large subunit biogenesis|intercellular bridge|unfolded protein binding|cytosol|heparin binding
Aanat	0.287229	0.243921	0.185158	0.1818	0.209264	0.219668	0.618732	0.245726	0.231354	0.298275	0.349012	0.378905	GeneID:25120,Genbank:NM_012818.2,RGD:2006	aralkylamine N-acetyltransferase	GO:0051592,GO:0032868,GO:0009416,GO:0004059,GO:0071320,GO:0034097,GO:0009648,GO:0034695,GO:0010043,GO:0004060,GO:0071889,GO:0043153,GO:0005737,GO:0005829,GO:0014070,GO:0006474,GO:0046688,GO:0030187,GO:0048471,GO:0007623,GO:0051412,GO:0051591	response to calcium ion|response to insulin|response to light stimulus|aralkylamine N-acetyltransferase activity|cellular response to cAMP|response to cytokine|photoperiodism|response to prostaglandin E|response to zinc ion|arylamine N-acetyltransferase activity|14-3-3 protein binding|entrainment of circadian clock by photoperiod|cytoplasm|cytosol|response to organic cyclic compound|N-terminal pr…	rno00380	Tryptophan metabolism
Aar2	7.57533	7.2836	6.58972	6.09245	5.88432	5.68133	7.28451	6.02369	6.35805	6.6972	7.41238	7.19131	GeneID:296312,Genbank:XM_006235399.3,RGD:1311066	AAR2 splicing factor homolog	GO:0008150,GO:0000244,GO:0003674,GO:0005575	biological_process|spliceosomal tri-snRNP complex assembly|molecular_function|cellular_component
Aard	0.20209	0.482679	0.388766	0.225236	0.333928	0.11128	0.0356179	0.320926	0.424343	0.117233	0.124314	0.0568262	GeneID:246323,Genbank:NM_145093.1,RGD:631378	alanine and arginine rich domain containing protein	GO:0030324	lung development
Aars	22.7642	25.1072	23.1476	35.7803	35.4339	34.1311	41.8858	35.7985	30.4881	24.2011	24.8905	25.135	GeneID:292023,Genbank:NM_001100517.1,RGD:1304832	alanyl-tRNA synthetase	GO:0050905,GO:0006419,GO:0002161,GO:0106074,GO:0002196,GO:0140018,GO:0004813,GO:0005524,GO:0005737,GO:0016597,GO:0005739,GO:0021680,GO:0005829,GO:0043524,GO:0000049,GO:0046872,GO:0006400,GO:0050885	neuromuscular process|alanyl-tRNA aminoacylation|aminoacyl-tRNA editing activity|aminoacyl-tRNA metabolism involved in translational fidelity|Ser-tRNA(Ala) hydrolase activity|regulation of cytoplasmic translational fidelity|alanine-tRNA ligase activity|ATP binding|cytoplasm|amino acid binding|mitochondrion|cerebellar Purkinje cell layer development|cytosol|negative regulation of neuron apoptotic …	rno00970	Aminoacyl-tRNA biosynthesis
Aars2	3.45932	3.43113	3.82973	2.47222	2.68598	2.63281	3.54986	2.61806	3.59228	3.6	3.56747	3.63764	GeneID:301254,Genbank:XM_006244513.3,RGD:1310617	alanyl-tRNA synthetase 2, mitochondrial	GO:0033108,GO:0004813,GO:0046872,GO:0070143,GO:0005524,GO:0005739,GO:0006400,GO:0006419,GO:0008270,GO:0000049,GO:0016597	mitochondrial respiratory chain complex assembly|alanine-tRNA ligase activity|metal ion binding|mitochondrial alanyl-tRNA aminoacylation|ATP binding|mitochondrion|tRNA modification|alanyl-tRNA aminoacylation|zinc ion binding|tRNA binding|amino acid binding	rno00970	Aminoacyl-tRNA biosynthesis
Aarsd1	5.87999	6.26522	5.57482	4.13128	4.26107	4.7078	5.65153	4.57426	4.82649	4.57306	4.12306	5.0045	GeneID:619440,Genbank:NM_001034109.1,RGD:1561650	alanyl-tRNA synthetase domain containing 1	GO:0003676,GO:0004813,GO:0005524,GO:0005737,GO:0006419,GO:0006450,GO:0046872,GO:0106074,GO:0002161,GO:0002196	nucleic acid binding|alanine-tRNA ligase activity|ATP binding|cytoplasm|alanyl-tRNA aminoacylation|regulation of translational fidelity|metal ion binding|aminoacyl-tRNA metabolism involved in translational fidelity|aminoacyl-tRNA editing activity|Ser-tRNA(Ala) hydrolase activity
Aasdh	4.01687	4.83738	4.01422	1.77782	2.19145	2.46472	2.99709	1.86088	3.94015	5.06406	5.10173	5.56839	GeneID:364136,Genbank:XM_017599442.1,RGD:1311135	aminoadipate-semialdehyde dehydrogenase	GO:0003824,GO:0019482,GO:0043041	catalytic activity|beta-alanine metabolic process|amino acid activation for nonribosomal peptide biosynthetic process
Aasdhppt	14.6348	14.9585	15.3609	12.5006	11.7427	13.4846	16.4515	12.842	15.5083	15.1488	15.1865	15.4985	GeneID:300328,Genbank:XM_017595521.1,RGD:1311360	aminoadipate-semialdehyde dehydrogenase-phosphopantetheinyl transferase	GO:0005829,GO:0008897,GO:0019878,GO:0000287,GO:0005737	cytosol|holo-[acyl-carrier-protein] synthase activity|lysine biosynthetic process via aminoadipic acid|magnesium ion binding|cytoplasm	rno00770	Pantothenate and CoA biosynthesis
Aass	0.559564	1.72425	4.82273	0.509464	0.198441	0.493645	0.819536	0.113778	0.206859	2.59075	3.91885	1.71381	GeneID:296925,Genbank:NM_001100963.1,RGD:1310811	aminoadipate-semialdehyde synthase	GO:0055114,GO:0005737,GO:0005739,GO:0006091,GO:0008150,GO:0019477,GO:0019878,GO:0033512,GO:0043231,GO:0047130,GO:0003674,GO:0047131,GO:0004753,GO:0005575	oxidation-reduction process|cytoplasm|mitochondrion|generation of precursor metabolites and energy|biological_process|L-lysine catabolic process|lysine biosynthetic process via aminoadipic acid|L-lysine catabolic process to acetyl-CoA via saccharopine|intracellular membrane-bounded organelle|saccharopine dehydrogenase (NADP+, L-lysine-forming) activity|molecular_function|saccharopine dehydrogenas…	rno00310	Lysine degradation
Aatf	6.78471	6.78934	9.00886	6.97453	8.15639	7.14456	8.86366	7.80561	7.20711	7.39831	9.15032	8.32619	GeneID:114512,Genbank:NM_053720.1,RGD:620685	apoptosis antagonizing transcription factor	GO:2000378,GO:0040016,GO:0005634,GO:0042254,GO:0005730,GO:0042985,GO:0005737,GO:0005794,GO:0006357,GO:0043066,GO:0006915,GO:0043522,GO:0006974,GO:0007155,GO:0045893,GO:0007346,GO:0003700,GO:0045944,GO:0019904,GO:0005515,GO:0048156,GO:0032929	negative regulation of reactive oxygen species metabolic process|embryonic cleavage|nucleus|ribosome biogenesis|nucleolus|negative regulation of amyloid precursor protein biosynthetic process|cytoplasm|Golgi apparatus|regulation of transcription by RNA polymerase II|negative regulation of apoptotic process|apoptotic process|leucine zipper domain binding|cellular response to DNA damage stimulus|ce…
Aatk	2.7037	2.48612	2.30017	0.484324	0.614669	0.473099	0.641471	0.543744	0.692336	1.1697	1.13374	1.16012	GeneID:690853,Genbank:XM_006247926.3,RGD:1590980	apoptosis-associated tyrosine kinase	GO:0006915,GO:0007420,GO:0030517,GO:0032482,GO:0038083,GO:0044295,GO:0046777,GO:0048471,GO:0051402,GO:0055037,GO:0004713,GO:0005524,GO:0005783	apoptotic process|brain development|negative regulation of axon extension|Rab protein signal transduction|peptidyl-tyrosine autophosphorylation|axonal growth cone|protein autophosphorylation|perinuclear region of cytoplasm|neuron apoptotic process|recycling endosome|protein tyrosine kinase activity|ATP binding|endoplasmic reticulum
Abat	0.569048	0.356773	0.350237	0.0726716	0.0979461	0.0306	0.0783544	0.154035	0.200035	0.180528	0.355516	0.166679	GeneID:81632,Genbank:XM_006245760.3,RGD:620948	4-aminobutyrate aminotransferase	GO:0005759,GO:0007568,GO:0007620,GO:0007626,GO:0009449,GO:0009450,GO:0035094,GO:0010039,GO:0035640,GO:0014053,GO:0042135,GO:0021549,GO:0042220,GO:0042493,GO:0042803,GO:1904450,GO:0043005,GO:0045471,GO:0045776,GO:0001666,GO:0003867,GO:0005739,GO:0030170,GO:0031652,GO:0032024,GO:0032144,GO:0045964,GO:0032145,GO:0046872,GO:0033602,GO:0047298,GO:0034386,GO:0048148,GO:0051536,GO:0070474,GO:0090331,GO:…	mitochondrial matrix|aging|copulation|locomotory behavior|gamma-aminobutyric acid biosynthetic process|gamma-aminobutyric acid catabolic process|response to nicotine|response to iron ion|exploration behavior|negative regulation of gamma-aminobutyric acid secretion|neurotransmitter catabolic process|cerebellum development|response to cocaine|response to drug|protein homodimerization activity|posit…	rno00640,rno00650,rno00250,rno00280,rno00410,rno04727	Propanoate metabolism|Butanoate metabolism|Alanine, aspartate and glutamate metabolism|Valine, leucine and isoleucine degradation|beta-Alanine metabolism|GABAergic synapse
Abca1	35.706	33.9592	35.0184	34.6449	22.3418	30.096	54.4813	32.3024	67.753	26.4702	34.2288	38.5486	GeneID:313210,Genbank:XM_008763708.2,RGD:631344	ATP binding cassette subfamily A member 1	GO:0006911,GO:0007040,GO:0007186,GO:0007189,GO:0007584,GO:0008203,GO:0008509,GO:0032367,GO:0009897,GO:0032489,GO:0009986,GO:0033344,GO:0010875,GO:0033700,GO:0034185,GO:0034186,GO:0034188,GO:0043231,GO:0034364,GO:0043691,GO:0034380,GO:0045121,GO:0034616,GO:0045332,GO:0045335,GO:0048471,GO:0050702,GO:0002790,GO:0051117,GO:0005102,GO:0055091,GO:0005524,GO:0060155,GO:0005548,GO:0005794,GO:0005886,GO:…	phagocytosis, engulfment|lysosome organization|G-protein coupled receptor signaling pathway|adenylate cyclase-activating G-protein coupled receptor signaling pathway|response to nutrient|cholesterol metabolic process|anion transmembrane transporter activity|intracellular cholesterol transport|external side of plasma membrane|regulation of Cdc42 protein signal transduction|cell surface|cholesterol…	rno02010,rno04975,rno04979	ABC transporters|Fat digestion and absorption|Cholesterol metabolism
Abca12	0.00274655	0.00524797	0	0	0.00432223	0.00189047	0.0145222	0.00198256	0.00205969	0.00265548	0.00281588	0	GeneID:301482,Genbank:XM_237242.10,RGD:1304586	ATP binding cassette subfamily A member 12	GO:0048286,GO:0033700,GO:0005524,GO:0034191,GO:0005575,GO:0055085,GO:0035627,GO:0005737,GO:0055088,GO:0005829,GO:0005886,GO:0006869,GO:0042626,GO:0008150,GO:0061436,GO:0010875,GO:0072659,GO:0043129,GO:0016021,GO:0097209,GO:0030216,GO:0003674,GO:2000010,GO:0043231,GO:0031424,GO:0005102,GO:0045055,GO:0032940,GO:0005319	lung alveolus development|phospholipid efflux|ATP binding|apolipoprotein A-I receptor binding|cellular_component|transmembrane transport|ceramide transport|cytoplasm|lipid homeostasis|cytosol|plasma membrane|lipid transport|ATPase activity, coupled to transmembrane movement of substances|biological_process|establishment of skin barrier|positive regulation of cholesterol efflux|protein localizatio…	rno02010	ABC transporters
Abca13	0.00500008	0.00636926	0.0106875	0.0160991	0.00524572	0.00229439	0.0117501	0.0048123	0.00374966	0.00483428	0.00341752	0.00312441	GeneID:289797,Genbank:NM_001106020.2,RGD:1305895	ATP binding cassette subfamily A member 13	GO:0008150,GO:0016021,GO:0042626,GO:0055085,GO:0003674,GO:0005524,GO:0005575	biological_process|integral component of membrane|ATPase activity, coupled to transmembrane movement of substances|transmembrane transport|molecular_function|ATP binding|cellular_component	rno02010	ABC transporters
Abca14	0	0	0	0	0	0	0	0	0.00384666	0	0	0	GeneID:365362,Genbank:XM_017590528.1,RGD:1561491	ATP-binding cassette, subfamily A (ABC1), member 14	GO:0042626,GO:0043231,GO:0055085,GO:0005524,GO:0006869,GO:0016021	ATPase activity, coupled to transmembrane movement of substances|intracellular membrane-bounded organelle|transmembrane transport|ATP binding|lipid transport|integral component of membrane	rno02010	ABC transporters
Abca15	0	0	0	0	0	0	0	0	0.00346164	0	0	0	GeneID:293442,Genbank:XM_017588988.1,RGD:1305981	ATP-binding cassette, subfamily A (ABC1), member 15	GO:0005575,GO:0006869,GO:0008150,GO:0016021,GO:0042626,GO:0043231,GO:0055085,GO:0002244,GO:0003674,GO:0005524	cellular_component|lipid transport|biological_process|integral component of membrane|ATPase activity, coupled to transmembrane movement of substances|intracellular membrane-bounded organelle|transmembrane transport|hematopoietic progenitor cell differentiation|molecular_function|ATP binding
Abca16	0.334872	0.229202	0.0824141	0.297096	0.212367	0.172011	0.0836859	0.454582	0.198653	0.376924	0.286958	0.318564	GeneID:293444,Genbank:XM_008759838.2,RGD:1563534	ATP-binding cassette, subfamily A (ABC1), member 16	GO:0042626,GO:0043231,GO:0055085,GO:0005524,GO:0006869,GO:0016021	ATPase activity, coupled to transmembrane movement of substances|intracellular membrane-bounded organelle|transmembrane transport|ATP binding|lipid transport|integral component of membrane
Abca17	0.133593	0.153158	0.0734277	0.510494	0.168188	0.320522	0.440638	0.341645	0.406461	0.0442846	0.125225	0.118063	GeneID:287112,Genbank:XM_006245928.3,RGD:1560494	ATP-binding cassette, subfamily A (ABC1), member 17	GO:0006869,GO:0016021,GO:0042626,GO:0043231,GO:0055085,GO:0005524,GO:0005789,GO:0006638	lipid transport|integral component of membrane|ATPase activity, coupled to transmembrane movement of substances|intracellular membrane-bounded organelle|transmembrane transport|ATP binding|endoplasmic reticulum membrane|neutral lipid metabolic process	rno02010	ABC transporters
Abca2	25.4983	23.617	25.6877	13.0072	13.9143	13.8439	14.8456	14.8385	22.429	26.3502	28.9998	30.6196	GeneID:79248,Genbank:XM_017592052.1,RGD:620238	ATP binding cassette subfamily A member 2	GO:0005768,GO:0005815,GO:0006357,GO:0006869,GO:0042632,GO:0010008,GO:0016021,GO:0043231,GO:0048545,GO:0055085,GO:0070723,GO:0005524,GO:0005764,GO:0005765,GO:0016887,GO:0031410,GO:0032383,GO:0042626	endosome|microtubule organizing center|regulation of transcription by RNA polymerase II|lipid transport|cholesterol homeostasis|endosome membrane|integral component of membrane|intracellular membrane-bounded organelle|response to steroid hormone|transmembrane transport|response to cholesterol|ATP binding|lysosome|lysosomal membrane|ATPase activity|cytoplasmic vesicle|regulation of intracellular c…	rno02010,rno04142	ABC transporters|Lysosome
Abca3	19.377	20.1305	20.196	20.5626	17.9337	19.5856	33.168	22.5285	32.7852	23.5229	25.1398	27.6001	GeneID:302973,Genbank:XM_006246039.3,RGD:1307174	ATP binding cassette subfamily A member 3	GO:0006869,GO:0016021,GO:0042626,GO:0043231,GO:0051384,GO:0055085,GO:0097208,GO:0097233,GO:0003674,GO:0005524,GO:0005886	lipid transport|integral component of membrane|ATPase activity, coupled to transmembrane movement of substances|intracellular membrane-bounded organelle|response to glucocorticoid|transmembrane transport|alveolar lamellar body|alveolar lamellar body membrane|molecular_function|ATP binding|plasma membrane	rno02010	ABC transporters
Abca4	0.523796	0.374488	0.460764	0.662402	0.739681	0.616009	0.375998	0.868866	0.392805	0.583566	0.63304	0.601506	GeneID:310836,Genbank:XM_006233242.3,RGD:1309445	ATP binding cassette subfamily A member 4	GO:0055085,GO:0005524,GO:0090555,GO:0005548,GO:0005575,GO:0005887,GO:0006649,GO:0006869,GO:0007601,GO:0008150,GO:0016887,GO:0042626,GO:0043231,GO:0001750,GO:0045332,GO:0003674,GO:0045494,GO:0004012	transmembrane transport|ATP binding|phosphatidylethanolamine-translocating ATPase activity|phospholipid transporter activity|cellular_component|integral component of plasma membrane|phospholipid transfer to membrane|lipid transport|visual perception|biological_process|ATPase activity|ATPase activity, coupled to transmembrane movement of substances|intracellular membrane-bounded organelle|photorec…	rno02010	ABC transporters
Abca5	2.93221	2.79845	3.39678	2.72792	2.62444	2.47657	2.08065	2.55973	2.75324	3.90697	3.93941	3.89069	GeneID:286970,Genbank:XM_006247560.3,RGD:628661	ATP binding cassette subfamily A member 5	GO:0034375,GO:0005764,GO:0005765,GO:0042626,GO:0005770,GO:0005794,GO:0006869,GO:0010745,GO:0043231,GO:0015918,GO:0055085,GO:0016021,GO:0031902,GO:0000139,GO:0033344,GO:0005524	high-density lipoprotein particle remodeling|lysosome|lysosomal membrane|ATPase activity, coupled to transmembrane movement of substances|late endosome|Golgi apparatus|lipid transport|negative regulation of macrophage derived foam cell differentiation|intracellular membrane-bounded organelle|sterol transport|transmembrane transport|integral component of membrane|late endosome membrane|Golgi membr…	rno02010	ABC transporters
Abca6	0.196661	0.117889	0.169557	0.0143259	0.0151708	0.00796255	0.0135926	0.0139174	0.0144589	0.0372825	0.0237206	0	GeneID:303639,Genbank:XM_006247654.3,RGD:1308998	ATP binding cassette subfamily A member 6	GO:0005654,GO:0006869,GO:0008150,GO:0016021,GO:0042626,GO:0043231,GO:0055085,GO:0003674,GO:0005524,GO:0005575	nucleoplasm|lipid transport|biological_process|integral component of membrane|ATPase activity, coupled to transmembrane movement of substances|intracellular membrane-bounded organelle|transmembrane transport|molecular_function|ATP binding|cellular_component	rno02010	ABC transporters
Abca7	2.42593	2.79923	1.86687	3.63469	2.06006	3.25221	6.0492	3.55983	4.26124	1.92828	2.11911	1.98494	GeneID:299609,Genbank:XM_006240874.3,RGD:1303134	ATP binding cassette subfamily A member 7	GO:0006869,GO:0006909,GO:0007613,GO:0009986,GO:0010008,GO:0033700,GO:0010875,GO:0034188,GO:0016020,GO:0034380,GO:0034504,GO:0070374,GO:0090554,GO:0038027,GO:0090556,GO:1900223,GO:1901076,GO:0000139,GO:1902430,GO:0001891,GO:1902995,GO:0005524,GO:0005548,GO:0005622,GO:0005794,GO:0005886,GO:0016021,GO:0016324,GO:0016887,GO:0018149,GO:0030054,GO:0032587,GO:0042626,GO:0033344,GO:0042985,GO:0043231,GO:…	lipid transport|phagocytosis|memory|cell surface|endosome membrane|phospholipid efflux|positive regulation of cholesterol efflux|apolipoprotein A-I receptor activity|membrane|high-density lipoprotein particle assembly|protein localization to nucleus|positive regulation of ERK1 and ERK2 cascade|phosphatidylcholine-translocating ATPase activity|apolipoprotein A-I-mediated signaling pathway|phosphat…	rno02010	ABC transporters
Abca8	9.01767	7.96824	9.06433	4.23837	5.04268	5.49362	4.12557	4.12078	6.54097	9.92714	12.4047	11.4047	GeneID:303637,Genbank:XM_008768450.2,RGD:1307069	ATP binding cassette subfamily A member 8	GO:0005743,GO:0006869,GO:0008150,GO:0016021,GO:0042626,GO:0043231,GO:0055085,GO:0003674,GO:0005524,GO:0005575	mitochondrial inner membrane|lipid transport|biological_process|integral component of membrane|ATPase activity, coupled to transmembrane movement of substances|intracellular membrane-bounded organelle|transmembrane transport|molecular_function|ATP binding|cellular_component	rno02010	ABC transporters
Abca8a	40.6608	40.7416	47.2167	4.16492	5.34437	3.2192	5.5417	4.9755	9.36282	14.2474	12.9843	11.3371	GeneID:303638,Genbank:NM_001281824.1,RGD:1307333	ATP-binding cassette, subfamily A (ABC1), member 8a	GO:0005743,GO:0006869,GO:0008150,GO:0016021,GO:0042626,GO:0055085,GO:0003674,GO:0005524,GO:0005575	mitochondrial inner membrane|lipid transport|biological_process|integral component of membrane|ATPase activity, coupled to transmembrane movement of substances|transmembrane transport|molecular_function|ATP binding|cellular_component	rno02010	ABC transporters
Abca9	6.60815	5.54259	6.23392	5.07728	6.57976	4.76472	2.55832	3.76115	6.08809	5.05591	4.62081	4.28604	GeneID:287788,Genbank:XM_017597729.1,RGD:1305931	ATP binding cassette subfamily A member 9	GO:0006869,GO:0008150,GO:0016021,GO:0042626,GO:0043231,GO:0055085,GO:0003674,GO:0005524,GO:0005575	lipid transport|biological_process|integral component of membrane|ATPase activity, coupled to transmembrane movement of substances|intracellular membrane-bounded organelle|transmembrane transport|molecular_function|ATP binding|cellular_component	rno02010	ABC transporters
Abcb10	12.6775	12.668	12.9067	7.884	9.45417	8.67092	8.43989	8.51544	12.0995	14.7691	15.6985	17.2239	GeneID:361439,Genbank:NM_001012166.1,RGD:1311222	ATP binding cassette subfamily B member 10	GO:0005739,GO:0005743,GO:0008150,GO:0032592,GO:0042626,GO:0042803,GO:0055085,GO:0003674,GO:0005524,GO:0005575	mitochondrion|mitochondrial inner membrane|biological_process|integral component of mitochondrial membrane|ATPase activity, coupled to transmembrane movement of substances|protein homodimerization activity|transmembrane transport|molecular_function|ATP binding|cellular_component	rno02010	ABC transporters
Abcb11	0.0150092	0.00955959	0.00916622	0.00371739	0.00393664	0.00344364	0.044089	0.0252797	0.0450227	0.00483717	0.00512934	0.0140682	GeneID:83569,Genbank:NM_031760.1,RGD:619930	ATP binding cassette subfamily B member 11	GO:0046618,GO:0016324,GO:0005794,GO:0055085,GO:0042493,GO:0005886,GO:0042626,GO:0006855,GO:0006979,GO:0015126,GO:0015238,GO:0015721,GO:0043627,GO:0015722,GO:0045177,GO:0016020,GO:0000139,GO:0046581,GO:0016021,GO:0005515,GO:0005524	drug export|apical plasma membrane|Golgi apparatus|transmembrane transport|response to drug|plasma membrane|ATPase activity, coupled to transmembrane movement of substances|drug transmembrane transport|response to oxidative stress|canalicular bile acid transmembrane transporter activity|drug transmembrane transporter activity|bile acid and bile salt transport|response to estrogen|canalicular bile…	rno02010,rno04976,rno04979,rno01522	ABC transporters|Bile secretion|Cholesterol metabolism|Endocrine resistance
Abcb1a	2.19055	2.25217	1.90615	0.512101	0.566483	0.501583	0.684732	0.392928	0.30287	0.691825	0.981151	0.802363	GeneID:170913,Genbank:XM_006235994.3,RGD:619951	ATP binding cassette subfamily B member 1A	GO:0008559,GO:0009914,GO:0009986,GO:0010033,GO:0010046,GO:0014070,GO:0014072,GO:0035633,GO:0015893,GO:0036146,GO:0016020,GO:0042493,GO:0016021,GO:0042623,GO:0042908,GO:0043215,GO:0043278,GO:0071407,GO:0045177,GO:0071475,GO:0045332,GO:0071548,GO:0046581,GO:0071549,GO:0072089,GO:0090554,GO:0090555,GO:0000086,GO:1990962,GO:0097068,GO:0001666,GO:1990963,GO:0097327,GO:0001890,GO:2001025,GO:0099038,GO:…	xenobiotic transmembrane transporting ATPase activity|hormone transport|cell surface|response to organic substance|response to mycotoxin|response to organic cyclic compound|response to isoquinoline alkaloid|maintenance of permeability of blood-brain barrier|drug transport|cellular response to mycotoxin|membrane|response to drug|integral component of membrane|ATPase activity, coupled|xenobiotic tr…	rno02010,rno04976,rno05206,rno05226	ABC transporters|Bile secretion|MicroRNAs in cancer|Gastric cancer
Abcb1b	0.257435	0.32793	0.383218	1.29114	1.31665	1.08162	1.48406	2.17958	1.52836	1.04227	0.51137	1.31205	GeneID:24646,Genbank:XM_017592469.1,RGD:3318	ATP-binding cassette, subfamily B (MDR/TAP), member 1B	GO:0046581,GO:0016021,GO:0005215,GO:0046685,GO:0005515,GO:0048545,GO:0016324,GO:0005524,GO:0055085,GO:0006855,GO:0007420,GO:0007595,GO:0008559,GO:0032496,GO:0010046,GO:0071217,GO:0033189,GO:0010212,GO:0071356,GO:0033595,GO:0014045,GO:0097327,GO:0042493,GO:0014070,GO:0000139,GO:1903416,GO:0042626,GO:0015238,GO:0001666,GO:0042908,GO:0015893,GO:0001890	intercellular canaliculus|integral component of membrane|transporter activity|response to arsenic-containing substance|protein binding|response to steroid hormone|apical plasma membrane|ATP binding|transmembrane transport|drug transmembrane transport|brain development|lactation|xenobiotic transmembrane transporting ATPase activity|response to lipopolysaccharide|response to mycotoxin|cellular resp…	rno02010,rno04976,rno05206,rno05226	ABC transporters|Bile secretion|MicroRNAs in cancer|Gastric cancer
Abcb4	0.645157	0.611767	0.599825	1.58477	1.22364	1.4515	1.29406	0.830608	1.1626	0.62842	0.621952	0.78071	GeneID:24891,Genbank:XM_017592474.1,RGD:620248	ATP binding cassette subfamily B member 4	GO:0005925,GO:0006855,GO:0008525,GO:0015629,GO:0042626,GO:0016020,GO:0016021,GO:0042908,GO:0045121,GO:0045332,GO:0046581,GO:1901557,GO:0051384,GO:0055085,GO:1903413,GO:0055088,GO:2001140,GO:0000139,GO:0005515,GO:0005524,GO:0005654,GO:0005737,GO:0005829,GO:0005886,GO:0016324,GO:0030136,GO:0032376,GO:0032782,GO:0061092,GO:0042493,GO:0090554,GO:0099038,GO:0099040	focal adhesion|drug transmembrane transport|phosphatidylcholine transporter activity|actin cytoskeleton|ATPase activity, coupled to transmembrane movement of substances|membrane|integral component of membrane|xenobiotic transport|membrane raft|phospholipid translocation|intercellular canaliculus|response to fenofibrate|response to glucocorticoid|transmembrane transport|cellular response to bile a…	rno02010,rno04976	ABC transporters|Bile secretion
Abcb5	0	0.00619061	0.00593587	0	0	0	0.0228409	0.00935464	0	0.0125298	0	0	GeneID:314537,Genbank:XM_006240713.2,RGD:1566342	ATP binding cassette subfamily B member 5	GO:0016021,GO:0042391,GO:0042626,GO:0048058,GO:0055085,GO:0005524,GO:0005887,GO:0015562	integral component of membrane|regulation of membrane potential|ATPase activity, coupled to transmembrane movement of substances|compound eye corneal lens development|transmembrane transport|ATP binding|integral component of plasma membrane|efflux transmembrane transporter activity	rno02010	ABC transporters
Abcb6	11.2926	12.7518	12.6896	10.0425	10.6836	10.9307	8.0627	9.60909	10.2885	9.8221	10.9602	10.759	GeneID:140669,Genbank:NM_080582.1,RGD:71077	ATP-binding cassette, subfamily B (MDR/TAP), member 6	GO:0020037,GO:0005886,GO:0005654,GO:0031307,GO:0006779,GO:0005739,GO:0042626,GO:0007420,GO:0043588,GO:0005740,GO:0005741,GO:0015439,GO:0005768,GO:0055085,GO:0015562,GO:0015886,GO:0005783,GO:0016021,GO:0005794,GO:0005524,GO:0005829,GO:0016887	heme binding|plasma membrane|nucleoplasm|integral component of mitochondrial outer membrane|porphyrin-containing compound biosynthetic process|mitochondrion|ATPase activity, coupled to transmembrane movement of substances|brain development|skin development|mitochondrial envelope|mitochondrial outer membrane|heme-transporting ATPase activity|endosome|transmembrane transport|efflux transmembrane tr…	rno02010	ABC transporters
Abcb7	10.3624	10.0841	9.72108	7.24461	6.79765	7.03886	10.3706	7.5454	9.25034	10.0078	9.05477	9.91467	GeneID:302395,Genbank:NM_212518.1,RGD:1303086	ATP binding cassette subfamily B member 7	GO:0005743,GO:0006879,GO:0008150,GO:0016021,GO:0042626,GO:0055085,GO:0003674,GO:0005524,GO:0005575	mitochondrial inner membrane|cellular iron ion homeostasis|biological_process|integral component of membrane|ATPase activity, coupled to transmembrane movement of substances|transmembrane transport|molecular_function|ATP binding|cellular_component	rno02010	ABC transporters
Abcb8	8.47501	9.68278	8.59602	9.19901	8.84783	9.24925	11.4261	9.69979	10.3131	7.98281	7.87378	8.54153	GeneID:362302,Genbank:XM_006235946.2,RGD:1307655	ATP binding cassette subfamily B member 8	GO:0005730,GO:0005739,GO:0005743,GO:0016021,GO:0042626,GO:0055085,GO:0005524,GO:0005634	nucleolus|mitochondrion|mitochondrial inner membrane|integral component of membrane|ATPase activity, coupled to transmembrane movement of substances|transmembrane transport|ATP binding|nucleus	rno02010	ABC transporters
Abcb9	0.777596	0.910411	0.691375	0.470148	0.329918	0.362063	0.315752	0.335677	0.520247	0.52332	0.6878	0.43588	GeneID:63886,Genbank:NM_022238.1,RGD:620254	ATP binding cassette subfamily B member 9	GO:0055085,GO:0022857,GO:0005764,GO:0030176,GO:0005765,GO:0005769,GO:0005783,GO:0008150,GO:0015031,GO:0042626,GO:0015440,GO:0042803,GO:0015833,GO:0002474,GO:0043190,GO:0016021,GO:0005524,GO:0043231	transmembrane transport|transmembrane transporter activity|lysosome|integral component of endoplasmic reticulum membrane|lysosomal membrane|early endosome|endoplasmic reticulum|biological_process|protein transport|ATPase activity, coupled to transmembrane movement of substances|peptide-transporting ATPase activity|protein homodimerization activity|peptide transport|antigen processing and presenta…	rno02010,rno04142	ABC transporters|Lysosome
Abcc1	24.0821	26.4358	21.3605	20.6577	19.0763	25.4212	27.462	24.3431	26.5049	24.4237	29.8116	26.6285	GeneID:24565,Genbank:NM_022281.2,RGD:3112	ATP binding cassette subfamily C member 1	GO:0005887,GO:0006855,GO:0006979,GO:0008514,GO:0008559,GO:0030335,GO:0033700,GO:0015238,GO:0034040,GO:0015431,GO:0034634,GO:0034775,GO:0060548,GO:0042493,GO:0099039,GO:0042626,GO:1901215,GO:0042908,GO:1905701,GO:0004012,GO:0005324,GO:0005524,GO:0005737,GO:0005774,GO:0005886,GO:0015562,GO:0015911,GO:0016020,GO:0016323,GO:0045332,GO:0016491,GO:0046618,GO:0016887,GO:0046623,GO:0046624,GO:0055085,GO:…	integral component of plasma membrane|drug transmembrane transport|response to oxidative stress|organic anion transmembrane transporter activity|xenobiotic transmembrane transporting ATPase activity|positive regulation of cell migration|phospholipid efflux|drug transmembrane transporter activity|lipid-transporting ATPase activity|glutathione S-conjugate-exporting ATPase activity|glutathione trans…	rno02010,rno04071,rno04977,rno05206,rno01523	ABC transporters|Sphingolipid signaling pathway|Vitamin digestion and absorption|MicroRNAs in cancer|Antifolate resistance
Abcc10	3.9333	3.57459	3.36579	2.37576	2.66675	2.36489	3.12824	2.4539	4.13885	3.51729	3.80943	4.14331	GeneID:316231,Genbank:NM_001108201.1,RGD:1306696	ATP binding cassette subfamily C member 10	GO:0005887,GO:0008150,GO:0016020,GO:0042626,GO:0055085,GO:0003674,GO:0005524,GO:0005575	integral component of plasma membrane|biological_process|membrane|ATPase activity, coupled to transmembrane movement of substances|transmembrane transport|molecular_function|ATP binding|cellular_component	rno02010	ABC transporters
Abcc12	0	0.00460415	0.0220735	0.00358079	0.0151679	0.0165855	0	0	0.0144561	0	0.00494085	0.0135513	GeneID:291923,Genbank:XM_008772378.2,RGD:735100	ATP binding cassette subfamily C member 12	GO:0016021,GO:0042626,GO:0055085,GO:0005524,GO:0005739,GO:0016020	integral component of membrane|ATPase activity, coupled to transmembrane movement of substances|transmembrane transport|ATP binding|mitochondrion|membrane	rno02010	ABC transporters
Abcc2	0.0548266	0.109522	0.0410928	0.0629579	0.0431401	0.271024	0.0746693	0.0791515	0.0598045	0.00963795	0.0306603	0.0280307	GeneID:25303,Genbank:NM_012833.2,RGD:2366	ATP binding cassette subfamily C member 2	GO:0009986,GO:0015694,GO:0015711,GO:0015722,GO:0015732,GO:0016020,GO:0043627,GO:0046581,GO:0016324,GO:0046685,GO:0048545,GO:0055085,GO:0070327,GO:0071222,GO:0071347,GO:0071354,GO:0071356,GO:0005515,GO:0005524,GO:0005887,GO:0006855,GO:0006979,GO:0007565,GO:0008514,GO:0009408,GO:0016999,GO:0019904,GO:0030644,GO:0031427,GO:0031526,GO:0032496,GO:0071549,GO:0033762,GO:0097327,GO:0042493,GO:1901086,GO:…	cell surface|mercury ion transport|organic anion transport|canalicular bile acid transport|prostaglandin transport|membrane|response to estrogen|intercellular canaliculus|apical plasma membrane|response to arsenic-containing substance|response to steroid hormone|transmembrane transport|thyroid hormone transport|cellular response to lipopolysaccharide|cellular response to interleukin-1|cellular re…	rno02010,rno04976,rno01524,rno01523	ABC transporters|Bile secretion|Platinum drug resistance|Antifolate resistance
Abcc3	15.5763	18.116	16.0961	21.0797	13.88	26.8812	35.3339	32.0301	48.5022	18.9688	26.8798	23.8936	GeneID:140668,Genbank:NM_080581.1,RGD:71101	ATP binding cassette subfamily C member 3	GO:0032496,GO:0006855,GO:0042626,GO:0008559,GO:0010033,GO:0010243,GO:0014070,GO:0015238,GO:0015432,GO:0015722,GO:0042908,GO:0015893,GO:0055085,GO:0016020,GO:0016021,GO:0005524,GO:0016323,GO:0005887,GO:0032355	response to lipopolysaccharide|drug transmembrane transport|ATPase activity, coupled to transmembrane movement of substances|xenobiotic transmembrane transporting ATPase activity|response to organic substance|response to organonitrogen compound|response to organic cyclic compound|drug transmembrane transporter activity|bile acid-exporting ATPase activity|canalicular bile acid transport|xenobiotic…	rno02010,rno04976,rno01523	ABC transporters|Bile secretion|Antifolate resistance
Abcc4	9.57198	10.7337	9.04866	17.6358	12.7165	26.8267	30.2782	27.7525	31.4459	10.4737	10.6554	12.062	GeneID:170924,Genbank:XM_008770939.1,RGD:620266	ATP binding cassette subfamily C member 4	GO:0042493,GO:0005886,GO:0042626,GO:0005887,GO:0005929,GO:0010033,GO:0010243,GO:0014070,GO:0016020,GO:0048661,GO:0055085,GO:0016021,GO:0016323,GO:0060271,GO:0003674,GO:0031088,GO:0005524,GO:0032310	response to drug|plasma membrane|ATPase activity, coupled to transmembrane movement of substances|integral component of plasma membrane|cilium|response to organic substance|response to organonitrogen compound|response to organic cyclic compound|membrane|positive regulation of smooth muscle cell proliferation|transmembrane transport|integral component of membrane|basolateral plasma membrane|cilium…	rno02010,rno04024,rno04976,rno01523	ABC transporters|cAMP signaling pathway|Bile secretion|Antifolate resistance
Abcc5	40.6354	42.3488	36.2379	21.8086	23.4168	24.8728	37.0434	25.7229	40.0866	49.2376	64.308	50.7343	GeneID:116721,Genbank:XM_006248593.2,RGD:70913	ATP binding cassette subfamily C member 5	GO:0008514,GO:0015711,GO:0016020,GO:0016021,GO:0032496,GO:0032868,GO:0042626,GO:0048471,GO:0055085,GO:0003674,GO:0005524,GO:0005887	organic anion transmembrane transporter activity|organic anion transport|membrane|integral component of membrane|response to lipopolysaccharide|response to insulin|ATPase activity, coupled to transmembrane movement of substances|perinuclear region of cytoplasm|transmembrane transport|molecular_function|ATP binding|integral component of plasma membrane	rno02010,rno01523	ABC transporters|Antifolate resistance
Abcc6	0.0492948	0.0706425	0.0338678	0.00915679	0.0121211	0.0190856	0.0162902	0.00667175	0.0231045	0.00595753	0	0.00288778	GeneID:81642,Genbank:XM_017589769.1,RGD:620268	ATP binding cassette subfamily C member 6	GO:0005774,GO:0005886,GO:0008150,GO:0016020,GO:0016021,GO:0016323,GO:0016324,GO:0016328,GO:0016887,GO:0005524,GO:0042626,GO:0005634,GO:0055085	vacuolar membrane|plasma membrane|biological_process|membrane|integral component of membrane|basolateral plasma membrane|apical plasma membrane|lateral plasma membrane|ATPase activity|ATP binding|ATPase activity, coupled to transmembrane movement of substances|nucleus|transmembrane transport	rno02010	ABC transporters
Abcc8	0.021209	0.0607876	0.00485719	0.00787939	0.0125162	0.00729914	0	0.011482	0.00795252	0.0153793	0.0380526	0.0149095	GeneID:25559,Genbank:XM_008759321.2,RGD:3786	ATP binding cassette subfamily C member 8	GO:0006813,GO:0007165,GO:0007565,GO:0007613,GO:0008076,GO:0008281,GO:0008282,GO:0042383,GO:0042493,GO:0008542,GO:0042626,GO:0043268,GO:0044325,GO:0046676,GO:0050768,GO:0055085,GO:0001678,GO:0005267,GO:0005524,GO:0005739,GO:0005886,GO:0005887,GO:0009268,GO:0010043,GO:0010989,GO:0016020,GO:0016525,GO:0019905,GO:0030672,GO:0060253,GO:0032496,GO:0061045,GO:0032760,GO:0061855,GO:0032868,GO:0071310,GO:…	potassium ion transport|signal transduction|female pregnancy|memory|voltage-gated potassium channel complex|sulfonylurea receptor activity|inward rectifying potassium channel|sarcolemma|response to drug|visual learning|ATPase activity, coupled to transmembrane movement of substances|positive regulation of potassium ion transport|ion channel binding|negative regulation of insulin secretion|negativ…	rno02010,rno04911,rno04930	ABC transporters|Insulin secretion|Type II diabetes mellitus
Abcc9	50.2122	47.9969	49.7465	18.2764	16.0382	16.7154	17.7607	18.4456	26.8589	35.7408	33.2388	29.9844	GeneID:25560,Genbank:NM_013040.2,RGD:3787	ATP binding cassette subfamily C member 9	GO:0005886,GO:0005887,GO:0006813,GO:0006932,GO:0007165,GO:0008076,GO:0016021,GO:0008144,GO:0019905,GO:0030017,GO:0008281,GO:0030315,GO:0042383,GO:0042493,GO:0001669,GO:0005267,GO:0005515,GO:0005524,GO:0005739,GO:0008282,GO:0042626,GO:0010107,GO:0015459,GO:0042802,GO:0016020,GO:0044325,GO:0051607,GO:0055085,GO:0071805	plasma membrane|integral component of plasma membrane|potassium ion transport|substrate-dependent cell migration, cell contraction|signal transduction|voltage-gated potassium channel complex|integral component of membrane|drug binding|syntaxin binding|sarcomere|sulfonylurea receptor activity|T-tubule|sarcolemma|response to drug|acrosomal vesicle|potassium channel activity|protein binding|ATP bind…	rno02010	ABC transporters
Abcd1	12.1302	12.4055	11.8532	9.41057	9.58052	10.1368	6.98073	9.03858	10.4178	10.7438	9.02455	10.3483	GeneID:363516,Genbank:XM_017602115.1,RGD:1562128	ATP binding cassette subfamily D member 1	GO:0042758,GO:0005524,GO:0042760,GO:0005737,GO:0042802,GO:0005777,GO:0005778,GO:0005779,GO:0042803,GO:0006635,GO:0048471,GO:0007031,GO:0055085,GO:0015910,GO:0016887,GO:0005324,GO:0019899,GO:0005515,GO:0042626	long-chain fatty acid catabolic process|ATP binding|very long-chain fatty acid catabolic process|cytoplasm|identical protein binding|peroxisome|peroxisomal membrane|integral component of peroxisomal membrane|protein homodimerization activity|fatty acid beta-oxidation|perinuclear region of cytoplasm|peroxisome organization|transmembrane transport|peroxisomal long-chain fatty acid import|ATPase act…	rno02010,rno04146	ABC transporters|Peroxisome
Abcd2	2.37379	2.00182	2.1369	0.552877	0.668099	0.477599	0.555152	0.63267	0.828454	1.05044	0.687989	1.16383	GeneID:84356,Genbank:NM_033352.1,RGD:69244	ATP binding cassette subfamily D member 2	GO:0005777,GO:0005778,GO:0006635,GO:0016021,GO:0032000,GO:0042626,GO:0042760,GO:0042803,GO:0000038,GO:0005524,GO:0055085	peroxisome|peroxisomal membrane|fatty acid beta-oxidation|integral component of membrane|positive regulation of fatty acid beta-oxidation|ATPase activity, coupled to transmembrane movement of substances|very long-chain fatty acid catabolic process|protein homodimerization activity|very long-chain fatty acid metabolic process|ATP binding|transmembrane transport	rno02010,rno04146	ABC transporters|Peroxisome
Abcd3	54.7353	57.4186	51.0974	60.4212	49.7786	61.1387	186.358	101.239	148.631	64.5626	77.065	69.9768	GeneID:25270,Genbank:NM_012804.1,RGD:2007	ATP binding cassette subfamily D member 3	GO:0055085,GO:0015910,GO:0005524,GO:0016021,GO:0005739,GO:0016887,GO:0005777,GO:0005778,GO:0042493,GO:0005782,GO:0042626,GO:0006633,GO:0042760,GO:0042803,GO:0006635,GO:0005324,GO:0043231,GO:0007031,GO:0005515,GO:0043621,GO:0014070	transmembrane transport|peroxisomal long-chain fatty acid import|ATP binding|integral component of membrane|mitochondrion|ATPase activity|peroxisome|peroxisomal membrane|response to drug|peroxisomal matrix|ATPase activity, coupled to transmembrane movement of substances|fatty acid biosynthetic process|very long-chain fatty acid catabolic process|protein homodimerization activity|fatty acid beta-o…	rno02010,rno04146	ABC transporters|Peroxisome
Abcd4	2.97936	3.95844	2.58254	2.86437	2.42832	3.25615	3.09606	2.75956	3.75583	3.55167	2.84654	2.58239	GeneID:299196,Genbank:NM_001013100.3,RGD:1307273	ATP binding cassette subfamily D member 4	GO:0005789,GO:0009235,GO:0016021,GO:0042626,GO:0055085,GO:1990830,GO:0005524,GO:0005777	endoplasmic reticulum membrane|cobalamin metabolic process|integral component of membrane|ATPase activity, coupled to transmembrane movement of substances|transmembrane transport|cellular response to leukemia inhibitory factor|ATP binding|peroxisome	rno02010,rno04146	ABC transporters|Peroxisome
Abce1	35.3585	37.8559	36.5706	51.089	48.3768	49.0294	52.5054	48.0873	41.3136	37.6579	38.2888	37.2352	GeneID:361390,Genbank:XM_006255407.3,RGD:1305301	ATP binding cassette subfamily E member 1	GO:0060698,GO:0005524,GO:0060702,GO:0005575,GO:0005737,GO:0005739,GO:0005829,GO:0005852,GO:0006413,GO:0006415,GO:0008150,GO:0000054,GO:0016887,GO:0003674,GO:0043024,GO:0005506	endoribonuclease inhibitor activity|ATP binding|negative regulation of endoribonuclease activity|cellular_component|cytoplasm|mitochondrion|cytosol|eukaryotic translation initiation factor 3 complex|translational initiation|translational termination|biological_process|ribosomal subunit export from nucleus|ATPase activity|molecular_function|ribosomal small subunit binding|iron ion binding
Abcf1	19.0323	17.3208	18.4091	21.8768	19.2361	20.0217	26.3723	20.6364	22.0013	17.0691	18.4388	18.6096	GeneID:85493,Genbank:XM_017601783.1,RGD:620286	ATP binding cassette subfamily F member 1	GO:0042254,GO:0005635,GO:0005654,GO:0042788,GO:0005737,GO:0005829,GO:0005840,GO:0006412,GO:0043022,GO:0006413,GO:0045727,GO:0008494,GO:0005524,GO:0016887	ribosome biogenesis|nuclear envelope|nucleoplasm|polysomal ribosome|cytoplasm|cytosol|ribosome|translation|ribosome binding|translational initiation|positive regulation of translation|translation activator activity|ATP binding|ATPase activity
Abcf2	16.876	17.7794	16.12	18.1257	15.6503	18.1181	19.6411	18.2872	16.6231	16.8413	15.9564	17.2457	GeneID:311959,Genbank:XM_006235929.3,RGD:1304942	ATP binding cassette subfamily F member 2	GO:0005524,GO:0016887	ATP binding|ATPase activity
Abcf3	16.9833	17.3701	15.9785	14.8742	13.9132	13.5796	17.1748	13.4194	16.8317	16.758	17.2686	17.5282	GeneID:287982,Genbank:NM_001011896.1,RGD:1310468	ATP binding cassette subfamily F member 3	GO:0051607,GO:0005524,GO:0016887,GO:0045296	defense response to virus|ATP binding|ATPase activity|cadherin binding
Abcg1	7.5557	7.9585	6.46174	10.0947	6.42091	8.97871	10.2418	10.2975	18.9218	6.92309	9.43992	11.7565	GeneID:85264,Genbank:NM_053502.1,RGD:620294	ATP binding cassette subfamily G member 1	GO:0010872,GO:0010875,GO:0010888,GO:0016021,GO:0017127,GO:0034436,GO:0019534,GO:0034437,GO:0030301,GO:0042626,GO:0042632,GO:0042803,GO:0042987,GO:0043531,GO:0043691,GO:0045542,GO:0046982,GO:0005524,GO:0005548,GO:0005739,GO:0005768,GO:0005886,GO:0006355,GO:0008203,GO:0009897,GO:0010033,GO:0032367,GO:0033344,GO:0033700,GO:0033993,GO:0034041,GO:0055037,GO:0055085,GO:0034374,GO:0034375,GO:0055091,GO:…	regulation of cholesterol esterification|positive regulation of cholesterol efflux|negative regulation of lipid storage|integral component of membrane|cholesterol transporter activity|glycoprotein transport|toxin transmembrane transporter activity|glycoprotein transporter activity|cholesterol transport|ATPase activity, coupled to transmembrane movement of substances|cholesterol homeostasis|protei…	rno02010	ABC transporters
Abcg2	1.60741	1.49613	1.2197	1.17384	0.776239	1.28208	1.05782	1.06567	0.594952	0.893778	0.29706	0.821214	GeneID:312382,Genbank:XM_006236576.2,RGD:631345	ATP-binding cassette, subfamily G (WHITE), member 2	GO:0008559,GO:0010039,GO:0015238,GO:0015747,GO:0015893,GO:0016020,GO:0016021,GO:0043278,GO:0016324,GO:0046415,GO:0017127,GO:0046618,GO:0019389,GO:0046983,GO:0051593,GO:0055085,GO:0060136,GO:0071392,GO:0071549,GO:0097744,GO:0005524,GO:0005634,GO:0005886,GO:0006855,GO:0007568,GO:0008092,GO:0031966,GO:0032496,GO:0032868,GO:0033344,GO:0042626,GO:0042802,GO:1904479,GO:0042803,GO:1904612,GO:0042908,GO:…	xenobiotic transmembrane transporting ATPase activity|response to iron ion|drug transmembrane transporter activity|urate transport|drug transport|membrane|integral component of membrane|response to morphine|apical plasma membrane|urate metabolic process|cholesterol transporter activity|drug export|glucuronoside metabolic process|protein dimerization activity|response to folic acid|transmembrane t…	rno02010,rno04976,rno01523	ABC transporters|Bile secretion|Antifolate resistance
Abcg3	2.42202	2.83423	2.0743	3.1094	2.37938	2.50557	4.21824	1.82071	4.0088	3.04838	2.8211	3.06273	GeneID:498327,Genbank:NM_001128311.1,RGD:1565568	ATP-binding cassette, subfamily G (WHITE), member 3
Abcg3l1	3.54854	3.04966	2.88788	2.30707	1.82612	1.84822	2.11499	1.80674	2.98782	2.97904	2.4606	2.70986	GeneID:289453,Genbank:XM_017599095.1,RGD:1303294	ATP-binding cassette, subfamily G (WHITE), member 3-like 1	GO:0016021,GO:0016324,GO:0016887,GO:0017127,GO:0033344,GO:0042626,GO:0043235,GO:0055085,GO:0005524,GO:0005886,GO:0006855	integral component of membrane|apical plasma membrane|ATPase activity|cholesterol transporter activity|cholesterol efflux|ATPase activity, coupled to transmembrane movement of substances|receptor complex|transmembrane transport|ATP binding|plasma membrane|drug transmembrane transport	rno02010	ABC transporters
Abcg3l3	3.87518	3.50739	4.26695	4.23915	3.55664	3.74486	2.89519	4.65543	6.0271	2.98989	3.02354	3.71491	GeneID:305142,Genbank:XM_017599162.1,RGD:1564709	ATP-binding cassette, subfamily G (WHITE), member 3-like 3	GO:0016021,GO:0016324,GO:0017127,GO:0033344,GO:0042626,GO:0043235,GO:0055085,GO:0005524,GO:0005886,GO:0006855	integral component of membrane|apical plasma membrane|cholesterol transporter activity|cholesterol efflux|ATPase activity, coupled to transmembrane movement of substances|receptor complex|transmembrane transport|ATP binding|plasma membrane|drug transmembrane transport
Abcg3l4	1.85779	1.65996	1.72634	2.03581	1.82987	1.89509	2.39096	2.24789	2.62602	1.38268	1.74025	2.0044	GeneID:360997,Genbank:NM_001037205.1,RGD:1588538	ATP-binding cassette, subfamily G (WHITE), member 3-like 4
Abcg4	43.9123	40.7317	45.2021	8.66144	13.099	12.9491	7.99554	12.7708	17.8792	32.2963	24.5941	30.6681	GeneID:300664,Genbank:XM_006242915.3,RGD:1305840	ATP binding cassette subfamily G member 4	GO:0017127,GO:0030301,GO:0033344,GO:0034041,GO:0042626,GO:0042803,GO:0046982,GO:0055085,GO:1990830,GO:0005524,GO:0005886,GO:0016021	cholesterol transporter activity|cholesterol transport|cholesterol efflux|sterol-transporting ATPase activity|ATPase activity, coupled to transmembrane movement of substances|protein homodimerization activity|protein heterodimerization activity|transmembrane transport|cellular response to leukemia inhibitory factor|ATP binding|plasma membrane|integral component of membrane	rno02010	ABC transporters
Abcg5	1.90608	2.98857	2.498	2.17522	2.56185	3.62204	3.45588	3.30474	3.81632	1.22565	1.17813	1.9832	GeneID:114628,Genbank:NM_053754.2,RGD:620298	ATP binding cassette subfamily G member 5	GO:0046982,GO:0042632,GO:0017127,GO:0005887,GO:0055085,GO:0043190,GO:0033344,GO:0006855,GO:0007584,GO:0043235,GO:0007588,GO:0010212,GO:0010949,GO:0015238,GO:0016020,GO:0042493,GO:0016324,GO:0045177,GO:0042626,GO:0045796,GO:0005524,GO:0046872,GO:0016887,GO:0005886	protein heterodimerization activity|cholesterol homeostasis|cholesterol transporter activity|integral component of plasma membrane|transmembrane transport|ATP-binding cassette (ABC) transporter complex|cholesterol efflux|drug transmembrane transport|response to nutrient|receptor complex|excretion|response to ionizing radiation|negative regulation of intestinal phytosterol absorption|drug transmem…	rno02010,rno04976,rno04975,rno04979	ABC transporters|Bile secretion|Fat digestion and absorption|Cholesterol metabolism
Abcg8	0.088795	0.120551	0.0984662	0.125009	0.0882543	0.189788	0.144144	0.188912	0.140188	0.0994061	0.0862449	0.0657066	GeneID:155192,Genbank:NM_130414.2,RGD:620300	ATP binding cassette subfamily G member 8	GO:0043190,GO:0033344,GO:0005887,GO:0043235,GO:0007584,GO:0045796,GO:0034041,GO:0007588,GO:0046872,GO:0010949,GO:0015248,GO:0015914,GO:0015918,GO:0042493,GO:0016324,GO:0046982,GO:0042626,GO:0016887,GO:0055085,GO:0017127,GO:0005524,GO:0042632,GO:0005886,GO:0055092,GO:0030301	ATP-binding cassette (ABC) transporter complex|cholesterol efflux|integral component of plasma membrane|receptor complex|response to nutrient|negative regulation of intestinal cholesterol absorption|sterol-transporting ATPase activity|excretion|metal ion binding|negative regulation of intestinal phytosterol absorption|sterol transporter activity|phospholipid transport|sterol transport|response to…	rno02010,rno04976,rno04975,rno04979	ABC transporters|Bile secretion|Fat digestion and absorption|Cholesterol metabolism
Abhd1	11.4641	11.8696	9.90992	5.55528	6.15891	5.9594	6.76762	5.74332	6.43748	7.26437	8.3088	9.63798	GeneID:313917,Genbank:NM_001008520.1,RGD:1310988	abhydrolase domain containing 1	GO:0008150,GO:0008970,GO:0016021,GO:0016298,GO:0016788,GO:0034338,GO:0044255,GO:0046470,GO:0047372,GO:0051792,GO:0051793,GO:0003674,GO:0052689,GO:0004623,GO:0005575	biological_process|phosphatidylcholine 1-acylhydrolase activity|integral component of membrane|lipase activity|hydrolase activity, acting on ester bonds|short-chain carboxylesterase activity|cellular lipid metabolic process|phosphatidylcholine metabolic process|acylglycerol lipase activity|medium-chain fatty acid biosynthetic process|medium-chain fatty acid catabolic process|molecular_function|ca…
Abhd10	0.752277	0.206295	0.15314	0.0724577	0.120578	0.258898	0.104351	0.0955312	0.0470123	0.329994	0.499894	0.62677	GeneID:303953,Genbank:XM_008768732.2,RGD:1308084	abhydrolase domain containing 10	GO:0005829,GO:0019391,GO:0102390,GO:0004553,GO:0005739	cytosol|glucuronoside catabolic process|mycophenolic acid acyl-glucuronide esterase activity|hydrolase activity, hydrolyzing O-glycosyl compounds|mitochondrion
Abhd11	7.30691	7.02264	7.89602	8.87529	7.86671	7.45373	12.8204	9.86972	9.15453	8.50293	7.82778	10.7039	GeneID:360831,Genbank:NM_001271180.1,RGD:1304681	abhydrolase domain containing 11	GO:0008150,GO:0008152,GO:0016787,GO:0003674,GO:0005575,GO:0005739	biological_process|metabolic process|hydrolase activity|molecular_function|cellular_component|mitochondrion
Abhd12	87.2334	89.9936	90.8114	80.7326	68.9849	94.9915	118.464	98.5462	155.455	97.8565	111.807	106.323	GeneID:499913,Genbank:NM_001024314.1,RGD:1562570	abhydrolase domain containing 12	GO:0052651,GO:0006660,GO:0007628,GO:0008474,GO:0010996,GO:0016021,GO:0032281,GO:0032839,GO:0046464,GO:0046475,GO:0002084,GO:0047372,GO:0004622,GO:0005737	monoacylglycerol catabolic process|phosphatidylserine catabolic process|adult walking behavior|palmitoyl-(protein) hydrolase activity|response to auditory stimulus|integral component of membrane|AMPA glutamate receptor complex|dendrite cytoplasm|acylglycerol catabolic process|glycerophospholipid catabolic process|protein depalmitoylation|acylglycerol lipase activity|lysophospholipase activity|cyt…
Abhd12b	0.157624	0.263532	0.0721965	0.175677	0.155032	0.189863	0.208357	0.0568891	0.118205	0.266695	0.363605	0.184678	GeneID:408202,Genbank:NM_001003928.1,RGD:1303145	abhydrolase domain containing 12B
Abhd13	11.7816	12.1287	11.6548	11.2624	10.8232	11.3921	12.1256	11.3699	11.8945	11.4881	12.1586	11.741	GeneID:306630,Genbank:NM_001271072.1,RGD:1308317	abhydrolase domain containing 13	GO:0016021,GO:0032839,GO:0002084,GO:0005737,GO:0008474	integral component of membrane|dendrite cytoplasm|protein depalmitoylation|cytoplasm|palmitoyl-(protein) hydrolase activity
Abhd14a	9.84666	8.52158	8.43104	3.5992	4.90891	4.892	5.40214	4.02707	7.39047	8.92263	10.6689	10.4114	GeneID:300982,Genbank:XM_008766494.2,RGD:1309721	abhydrolase domain containing 14A	GO:0016021,GO:0016787,GO:0005737,GO:0008152	integral component of membrane|hydrolase activity|cytoplasm|metabolic process
Abhd14b	30.5651	30.7287	32.2708	13.0607	14.0826	14.4349	13.6176	12.4127	18.9142	31.6461	33.1663	34.7597	GeneID:300983,Genbank:XM_006243724.2,RGD:1359649	abhydrolase domain containing 14b	GO:0005737,GO:0005829,GO:0008152,GO:0016787,GO:0045944,GO:0005634,GO:0005730	cytoplasm|cytosol|metabolic process|hydrolase activity|positive regulation of transcription by RNA polymerase II|nucleus|nucleolus
Abhd15	1.38988	1.26573	1.27322	2.00503	1.72037	1.90773	2.10583	1.94786	2.61489	1.04517	1.3083	1.41702	GeneID:303343,Genbank:NM_001107025.1,RGD:1304598	abhydrolase domain containing 15	GO:0016788,GO:0044255	hydrolase activity, acting on ester bonds|cellular lipid metabolic process
Abhd16a	14.1322	14.9065	13.1963	14.9677	14.7037	13.5878	20.5386	13.7518	17.1852	14.4689	16.717	17.2836	GeneID:361796,Genbank:NM_212531.2,RGD:1303164	abhydrolase domain containing 16A	GO:0047372,GO:0052651,GO:1905344,GO:0004622,GO:0016021	acylglycerol lipase activity|monoacylglycerol catabolic process|prostaglandin catabolic process|lysophospholipase activity|integral component of membrane
Abhd16b	0.0132668	0.0760486	0.0364596	0.0591453	0.0313168	0.0547897	0.0350737	0.0574586	0.0198981	0.115442	0.0136017	0.0248702	GeneID:311720,Genbank:NM_001014052.2,RGD:1309726	abhydrolase domain containing 16B	GO:0016787	hydrolase activity
Abhd17a	9.01017	9.05971	8.70184	8.53878	7.5738	7.96046	8.28488	8.07172	8.90224	7.56092	8.12624	8.88076	GeneID:299617,Genbank:NM_001006983.1,RGD:1359682	abhydrolase domain containing 17A	GO:0008474,GO:0010008,GO:0014069,GO:0018345,GO:0030054,GO:0043197,GO:0045211,GO:0055038,GO:0072657,GO:1902817,GO:0002084,GO:1905668,GO:0005886	palmitoyl-(protein) hydrolase activity|endosome membrane|postsynaptic density|protein palmitoylation|cell junction|dendritic spine|postsynaptic membrane|recycling endosome membrane|protein localization to membrane|negative regulation of protein localization to microtubule|protein depalmitoylation|positive regulation of protein localization to endosome|plasma membrane
Abhd17b	6.0731	7.21853	6.34046	6.78047	5.14666	5.66449	9.43912	6.43259	7.09312	6.65361	7.08801	8.00351	GeneID:309399,Genbank:XM_006231162.3,RGD:1305246	abhydrolase domain containing 17B	GO:0014069,GO:0018345,GO:0030054,GO:0043197,GO:0045211,GO:0055038,GO:1902473,GO:1902817,GO:1902950,GO:1905668,GO:0002084,GO:0005886,GO:0008474	postsynaptic density|protein palmitoylation|cell junction|dendritic spine|postsynaptic membrane|recycling endosome membrane|regulation of protein localization to synapse|negative regulation of protein localization to microtubule|regulation of dendritic spine maintenance|positive regulation of protein localization to endosome|protein depalmitoylation|plasma membrane|palmitoyl-(protein) hydrolase a…
Abhd17c	12.596	11.1269	10.6903	13.4451	11.4233	15.4512	38.177	17.9588	25.5857	14.014	17.5074	15.3439	GeneID:361601,Genbank:NM_001100736.1,RGD:1308210	abhydrolase domain containing 17C	GO:0018345,GO:0030054,GO:0043197,GO:0045211,GO:0055038,GO:1902817,GO:1905668,GO:0002084,GO:0008474,GO:0014069	protein palmitoylation|cell junction|dendritic spine|postsynaptic membrane|recycling endosome membrane|negative regulation of protein localization to microtubule|positive regulation of protein localization to endosome|protein depalmitoylation|palmitoyl-(protein) hydrolase activity|postsynaptic density
Abhd18	5.27366	3.69706	3.84172	2.36712	2.22348	2.23616	4.01291	2.12422	4.0763	4.31571	3.98588	4.94305	GeneID:499602,Genbank:XM_006232310.3,RGD:1563987	abhydrolase domain containing 18	GO:0005576	extracellular region
Abhd2	60.5798	71.7182	64.2518	79.398	71.8188	77.492	93.2462	87.5021	80.2842	75.8885	78.4177	73.1271	GeneID:293050,Genbank:NM_001106275.1,RGD:1311389	abhydrolase domain containing 2	GO:0046464,GO:0009611,GO:0047372,GO:0016298,GO:0016788,GO:0030336,GO:0032570,GO:0034338,GO:0036126,GO:0048240,GO:0042562,GO:0051792,GO:0043401,GO:0051793,GO:0001669,GO:0097524,GO:0044255,GO:0003707,GO:0007340	acylglycerol catabolic process|response to wounding|acylglycerol lipase activity|lipase activity|hydrolase activity, acting on ester bonds|negative regulation of cell migration|response to progesterone|short-chain carboxylesterase activity|sperm flagellum|sperm capacitation|hormone binding|medium-chain fatty acid biosynthetic process|steroid hormone mediated signaling pathway|medium-chain fatty a…
Abhd3	2.2125	2.84352	1.9906	0.861112	0.839362	1.14216	0.905239	1.04569	0.95799	1.41336	1.18818	1.07393	GeneID:291793,Genbank:NM_001106162.1,RGD:1310655	abhydrolase domain containing 3	GO:0051793,GO:0005575,GO:0008150,GO:0008970,GO:0016021,GO:0016298,GO:0016788,GO:0034338,GO:0044255,GO:0046470,GO:0003674,GO:0047372,GO:0004623,GO:0051792	medium-chain fatty acid catabolic process|cellular_component|biological_process|phosphatidylcholine 1-acylhydrolase activity|integral component of membrane|lipase activity|hydrolase activity, acting on ester bonds|short-chain carboxylesterase activity|cellular lipid metabolic process|phosphatidylcholine metabolic process|molecular_function|acylglycerol lipase activity|phospholipase A2 activity|me…
Abhd4	36.5917	33.007	35.6966	30.4784	28.9265	31.7647	42.6114	33.5783	48.153	37.9799	39.1299	38.0008	GeneID:364380,Genbank:XM_006251995.3,RGD:1311858	abhydrolase domain containing 4	GO:0070291,GO:0004622,GO:0052689,GO:0055088	N-acylethanolamine metabolic process|lysophospholipase activity|carboxylic ester hydrolase activity|lipid homeostasis
Abhd5	12.8738	12.5001	11.6152	12.7853	11.1423	14.0166	14.6869	12.8491	17.3077	13.4626	16.2036	16.0545	GeneID:316122,Genbank:NM_212524.1,RGD:1303237	abhydrolase domain containing 5	GO:0052689,GO:0010891,GO:0005515,GO:0055088,GO:0010898,GO:0005811,GO:0005829,GO:0006629,GO:0030154,GO:0006631,GO:0042171,GO:0006654,GO:0003841,GO:0050996,GO:0004806,GO:0051006	carboxylic ester hydrolase activity|negative regulation of sequestering of triglyceride|protein binding|lipid homeostasis|positive regulation of triglyceride catabolic process|lipid droplet|cytosol|lipid metabolic process|cell differentiation|fatty acid metabolic process|lysophosphatidic acid acyltransferase activity|phosphatidic acid biosynthetic process|1-acylglycerol-3-phosphate O-acyltransfer…	rno04923	Regulation of lipolysis in adipocyte
Abhd6	13.8007	15.285	13.6884	10.3051	10.6793	10.9061	13.7517	10.6254	14.9353	14.7563	17.556	14.3484	GeneID:305795,Genbank:XM_006251767.3,RGD:1359323	abhydrolase domain containing 6	GO:0060292,GO:0005739,GO:2000124,GO:0009395,GO:0016021,GO:0030336,GO:0032281,GO:0046464,GO:0046889,GO:0047372,GO:0004620	long term synaptic depression|mitochondrion|regulation of endocannabinoid signaling pathway|phospholipid catabolic process|integral component of membrane|negative regulation of cell migration|AMPA glutamate receptor complex|acylglycerol catabolic process|positive regulation of lipid biosynthetic process|acylglycerol lipase activity|phospholipase activity	rno04723	Retrograde endocannabinoid signaling
Abhd8	8.84235	9.50374	8.96136	4.7954	4.45845	5.29049	4.31036	4.52109	5.36392	8.11925	7.91933	7.90696	GeneID:306338,Genbank:NM_001107301.1,RGD:1305693	abhydrolase domain containing 8	GO:0016787	hydrolase activity
Abi1	33.4195	33.1158	32.0955	39.6108	35.1125	37.6669	58.0348	42.0472	45.3893	38.6196	40.011	39.6334	GeneID:79249,Genbank:XM_006254360.3,RGD:621008	abl-interactor 1	GO:0048813,GO:0035855,GO:0030296,GO:0005622,GO:0061098,GO:0043005,GO:0005634,GO:0072673,GO:0030426,GO:0005856,GO:0044877,GO:0008134,GO:0008154,GO:0014069,GO:0017124,GO:0031209,GO:0018108,GO:0045211,GO:0031252,GO:0045296,GO:0032433,GO:0030027,GO:0001756,GO:0030054,GO:0005515	dendrite morphogenesis|megakaryocyte development|protein tyrosine kinase activator activity|intracellular|positive regulation of protein tyrosine kinase activity|neuron projection|nucleus|lamellipodium morphogenesis|growth cone|cytoskeleton|protein-containing complex binding|transcription factor binding|actin polymerization or depolymerization|postsynaptic density|SH3 domain binding|SCAR complex|…
Abi2	25.3147	25.5421	25.6758	21.708	22.5768	22.6437	17.5564	20.9512	21.5385	22.9789	20.6354	22.4492	GeneID:286928,Genbank:NM_173143.1,RGD:628771	abl-interactor 2	GO:0070064,GO:0016358,GO:2000601,GO:0016477,GO:0016601,GO:0017124,GO:0018108,GO:0030027,GO:0030425,GO:0031209,GO:0031625,GO:0032433,GO:0043010,GO:0005829,GO:0044877,GO:0005913,GO:0048365,GO:0007611	proline-rich region binding|dendrite development|positive regulation of Arp2/3 complex-mediated actin nucleation|cell migration|Rac protein signal transduction|SH3 domain binding|peptidyl-tyrosine phosphorylation|lamellipodium|dendrite|SCAR complex|ubiquitin protein ligase binding|filopodium tip|camera-type eye development|cytosol|protein-containing complex binding|cell-cell adherens junction|Rac…	rno04810	Regulation of actin cytoskeleton
Abi3	3.55164	3.57319	2.60282	6.19346	5.23558	6.02672	8.48252	5.38899	6.35965	2.43875	2.37798	2.51372	GeneID:303476,Genbank:NM_001013118.1,RGD:1311794	ABI family, member 3	GO:0018108,GO:0030027,GO:0030334,GO:0042802,GO:0005622,GO:0005737	peptidyl-tyrosine phosphorylation|lamellipodium|regulation of cell migration|identical protein binding|intracellular|cytoplasm
Abi3bp	23.4478	22.4293	23.3644	47.0402	21.3402	40.8212	32.3637	21.2335	19.7328	11.2748	11.9003	12.1249	GeneID:363767,Genbank:XM_017598136.1,RGD:1562717	ABI family member 3 binding protein	GO:0005578,GO:0005614,GO:0005615,GO:0008201,GO:0010811,GO:0030198,GO:0031012,GO:0005518,GO:0005539,GO:0005576	proteinaceous extracellular matrix|interstitial matrix|extracellular space|heparin binding|positive regulation of cell-substrate adhesion|extracellular matrix organization|extracellular matrix|collagen binding|glycosaminoglycan binding|extracellular region
Abl1	3.12565	2.89867	3.06025	2.63899	2.07091	2.26377	2.82112	2.52637	2.96208	2.5023	2.65753	2.92597	GeneID:311860,Genbank:NM_001100850.1,RGD:1584969	ABL proto-oncogene 1, non-receptor tyrosine kinase	GO:0050731,GO:0050798,GO:0050853,GO:0050885,GO:0004672,GO:0051015,GO:0004713,GO:0051019,GO:0004715,GO:0051281,GO:0071560,GO:0051353,GO:0005080,GO:0071871,GO:0051444,GO:0005102,GO:0071901,GO:0051496,GO:0005515,GO:0072358,GO:0006975,GO:0005524,GO:0090050,GO:0006979,GO:0005634,GO:0090135,GO:0007169,GO:1900006,GO:0007173,GO:1905244,GO:1900026,GO:1900042,GO:0007204,GO:1905555,GO:1900272,GO:0007229,GO:…	positive regulation of peptidyl-tyrosine phosphorylation|activated T cell proliferation|B cell receptor signaling pathway|neuromuscular process controlling balance|protein kinase activity|actin filament binding|protein tyrosine kinase activity|mitogen-activated protein kinase binding|non-membrane spanning protein tyrosine kinase activity|positive regulation of release of sequestered calcium ion i…	rno04014,rno04012,rno04110,rno04722,rno04360,rno05200,rno05206,rno05220,rno05416	Ras signaling pathway|ErbB signaling pathway|Cell cycle|Neurotrophin signaling pathway|Axon guidance|Pathways in cancer|MicroRNAs in cancer|Chronic myeloid leukemia|Viral myocarditis
Abl2	7.60411	7.84903	8.03923	7.4394	6.98779	6.61964	9.77523	7.63807	7.48669	7.8785	8.56261	8.0416	GeneID:304883,Genbank:XM_006250052.2,RGD:1590898	ABL proto-oncogene 2, non-receptor tyrosine kinase	GO:0005524,GO:0005575,GO:0006468,GO:0006909,GO:0006930,GO:0007015,GO:0007169,GO:0021587,GO:0007173,GO:0022408,GO:0022414,GO:0007204,GO:0030027,GO:0030036,GO:0030145,GO:0030154,GO:0045087,GO:0030182,GO:0046632,GO:0031223,GO:0048008,GO:0031234,GO:0048813,GO:0050885,GO:0051017,GO:0000287,GO:0051353,GO:0001784,GO:0060020,GO:0001843,GO:0060563,GO:0001891,GO:0002118,GO:0003674,GO:0004713,GO:0004715,GO:…	ATP binding|cellular_component|protein phosphorylation|phagocytosis|substrate-dependent cell migration, cell extension|actin filament organization|transmembrane receptor protein tyrosine kinase signaling pathway|cerebellum morphogenesis|epidermal growth factor receptor signaling pathway|negative regulation of cell-cell adhesion|reproductive process|positive regulation of cytosolic calcium ion con…	rno04014,rno04012,rno05416	Ras signaling pathway|ErbB signaling pathway|Viral myocarditis
Ablim1	23.733	27.1906	22.4441	14.5084	16.1091	13.9497	24.9585	19.9751	18.9391	21.1184	21.437	21.4686	GeneID:307989,Genbank:XM_017590400.1,RGD:1565768	actin-binding LIM protein 1	GO:0060271,GO:0005515,GO:0005575,GO:0007411,GO:0008150,GO:0014069,GO:0015629,GO:0030027,GO:0030032,GO:0045944,GO:0001725,GO:0051015,GO:0003779	cilium assembly|protein binding|cellular_component|axon guidance|biological_process|postsynaptic density|actin cytoskeleton|lamellipodium|lamellipodium assembly|positive regulation of transcription by RNA polymerase II|stress fiber|actin filament binding|actin binding	rno04360	Axon guidance
Ablim2	1.91965	1.62439	2.80359	0.0815056	0.26757	0.200084	0.241668	0.205871	0.649871	1.82949	1.27646	1.75304	GeneID:360958,Genbank:XM_017599299.1,RGD:1303094	actin binding LIM protein family, member 2	GO:0015629,GO:0030016,GO:0030032,GO:0030036,GO:0045944,GO:0046872,GO:0051015,GO:0003779,GO:0006351	actin cytoskeleton|myofibril|lamellipodium assembly|actin cytoskeleton organization|positive regulation of transcription by RNA polymerase II|metal ion binding|actin filament binding|actin binding|transcription, DNA-templated	rno04360	Axon guidance
Ablim3	1.89089	1.70055	1.75757	1.98179	1.72781	1.74807	0.825833	2.98999	2.57405	1.7853	1.84765	1.89708	GeneID:307395,Genbank:XM_017600950.1,RGD:1565118	actin binding LIM protein family, member 3	GO:0006351,GO:0015629,GO:0030027,GO:0030032,GO:0030036,GO:0045944,GO:0046872,GO:0051015,GO:0060271,GO:0001725,GO:1903955,GO:0003779	transcription, DNA-templated|actin cytoskeleton|lamellipodium|lamellipodium assembly|actin cytoskeleton organization|positive regulation of transcription by RNA polymerase II|metal ion binding|actin filament binding|cilium assembly|stress fiber|positive regulation of protein targeting to mitochondrion|actin binding	rno04360	Axon guidance
Abo	1.33047	0.690473	1.74543	1.68423	1.35706	1.51498	3.87926	1.96819	3.01787	0.603475	0.825168	0.846771	GeneID:100301568,Genbank:NM_001160263.1,RGD:2307241	ABO blood group (transferase A, alpha 1-3-N-acetylgalactosaminyltransferase	GO:0030145,GO:0004380,GO:0030259,GO:0031410,GO:0004381,GO:0005576,GO:0005794,GO:0031982,GO:0006486,GO:0032526,GO:0008284,GO:0032580,GO:0009247,GO:0043066,GO:0009624,GO:0000166,GO:0051691,GO:0016021,GO:0001962,GO:0016757,GO:0003823	manganese ion binding|glycoprotein-fucosylgalactoside alpha-N-acetylgalactosaminyltransferase activity|lipid glycosylation|cytoplasmic vesicle|fucosylgalactoside 3-alpha-galactosyltransferase activity|extracellular region|Golgi apparatus|vesicle|protein glycosylation|response to retinoic acid|positive regulation of cell proliferation|Golgi cisterna membrane|glycolipid biosynthetic process|negativ…	rno00601	Glycosphingolipid biosynthesis - lacto and neolacto series
Abo2	0	0	0	0.0186165	0	0	0	0	0	0	0	0	GeneID:296504,Genbank:NM_001271298.2,RGD:1311152	histo-blood group ABO system transferase 2	GO:0005975,GO:0016021,GO:0016758	carbohydrate metabolic process|integral component of membrane|transferase activity, transferring hexosyl groups	rno00601	Glycosphingolipid biosynthesis - lacto and neolacto series
Abr	25.0665	26.0351	25.8743	22.9447	18.7173	18.9674	26.7977	19.271	21.4533	18.5144	20.0042	21.7434	GeneID:287537,Genbank:NM_001105814.2,RGD:1306279	active BCR-related	GO:0050728,GO:0005829,GO:0050766,GO:0005886,GO:0050885,GO:0007420,GO:0016020,GO:0030036,GO:0030336,GO:0032496,GO:0060313,GO:0035023,GO:0035556,GO:0042472,GO:0043114,GO:0002692,GO:0043314,GO:0005089,GO:0043547,GO:0005096	negative regulation of inflammatory response|cytosol|positive regulation of phagocytosis|plasma membrane|neuromuscular process controlling balance|brain development|membrane|actin cytoskeleton organization|negative regulation of cell migration|response to lipopolysaccharide|negative regulation of blood vessel remodeling|regulation of Rho protein signal transduction|intracellular signal transducti…
Abra	0.0785659	0.11259	0.179928	0.0291882	0.0772741	0.148713	0.103853	0.141779	0.117836	0.113941	0.0402745	0.110461	GeneID:286965,Genbank:NM_175844.3,RGD:708493	actin-binding Rho activating protein	GO:1902531,GO:0035025,GO:0003779,GO:0045893,GO:0005886,GO:0006351,GO:0015629,GO:0045944,GO:0030016,GO:0030017,GO:0051091,GO:0000060,GO:0032970	regulation of intracellular signal transduction|positive regulation of Rho protein signal transduction|actin binding|positive regulation of transcription, DNA-templated|plasma membrane|transcription, DNA-templated|actin cytoskeleton|positive regulation of transcription by RNA polymerase II|myofibril|sarcomere|positive regulation of DNA binding transcription factor activity|protein import into nuc…
Abracl	63.4145	60.3012	54.4227	70.8982	56.7255	67.3873	82.3219	63.9241	72.6964	52.8501	51.0616	46.5779	GeneID:685045,Genbank:NM_001099647.1,RGD:1583256	ABRA C-terminal like	GO:1902531,GO:0003779,GO:0015629,GO:0032970	regulation of intracellular signal transduction|actin binding|actin cytoskeleton|regulation of actin filament-based process
Abt1	8.12956	7.61919	7.12877	6.7148	7.42991	6.93804	10.1591	7.37358	7.19707	8.81216	7.48346	8.61538	GeneID:306960,Genbank:XM_006253972.3,RGD:1310785	activator of basal transcription 1	GO:0003677,GO:0003723,GO:0005667,GO:0005730,GO:0006357,GO:0006366,GO:0021522,GO:0034462,GO:0000447,GO:0000472,GO:0000480	DNA binding|RNA binding|transcription factor complex|nucleolus|regulation of transcription by RNA polymerase II|transcription by RNA polymerase II|spinal cord motor neuron differentiation|small-subunit processome assembly|endonucleolytic cleavage in ITS1 to separate SSU-rRNA from 5.8S rRNA and LSU-rRNA from tricistronic rRNA transcript (SSU-rRNA, 5.8S rRNA, LSU-rRNA)|endonucleolytic cleavage to g…
Abtb1	10.7153	9.30652	9.54698	5.82011	4.8929	5.72216	6.83221	5.41333	9.86693	8.99246	9.35777	10.8191	GeneID:297432,Genbank:NM_001005902.1,RGD:1359363	ankyrin repeat and BTB domain containing 1	GO:0005737,GO:0005829,GO:0005886,GO:0006414,GO:0006950,GO:0019005,GO:0030162,GO:0031625,GO:0043161,GO:0003746,GO:0005730	cytoplasm|cytosol|plasma membrane|translational elongation|response to stress|SCF ubiquitin ligase complex|regulation of proteolysis|ubiquitin protein ligase binding|proteasome-mediated ubiquitin-dependent protein catabolic process|translation elongation factor activity|nucleolus
Abtb2	2.51021	2.11511	2.24317	1.46636	1.68922	1.27372	1.31544	1.24295	1.48836	1.91347	1.70807	1.82883	GeneID:171440,Genbank:NM_134403.2,RGD:620724	ankyrin repeat and BTB domain containing 2	GO:0005737,GO:0005829,GO:0006950,GO:0019005,GO:0022008,GO:0030162,GO:0031625,GO:0043161,GO:0046982,GO:0097237,GO:0005634,GO:0005654	cytoplasm|cytosol|response to stress|SCF ubiquitin ligase complex|neurogenesis|regulation of proteolysis|ubiquitin protein ligase binding|proteasome-mediated ubiquitin-dependent protein catabolic process|protein heterodimerization activity|cellular response to toxic substance|nucleus|nucleoplasm
Ac1576	5.42772	5.18551	3.82172	2.98911	3.18215	3.44292	4.48301	3.13434	3.46379	3.91009	4.91005	5.64608	GeneID:102552783,Genbank:NM_001287624.1,RGD:7502825	uncharacterized LOC102552783	GO:0003676	nucleic acid binding
Acaa1	20.0847	18.3824	17.9139	15.3045	14.7361	15.7717	17.4079	13.8291	22.5681	23.3377	26.1382	27.0289	GeneID:24157,Genbank:NM_012489.2,RGD:67379	acetyl-CoA acyltransferase 1A	GO:0042493,GO:0005777,GO:0043231,GO:0048545,GO:0006635,GO:0007584,GO:0008206,GO:0008775,GO:0010124,GO:0016401,GO:0000038,GO:0003988,GO:0016747	response to drug|peroxisome|intracellular membrane-bounded organelle|response to steroid hormone|fatty acid beta-oxidation|response to nutrient|bile acid metabolic process|acetate CoA-transferase activity|phenylacetate catabolic process|palmitoyl-CoA oxidase activity|very long-chain fatty acid metabolic process|acetyl-CoA C-acyltransferase activity|transferase activity, transferring acyl groups o…
Acaa1b	3.76133	4.57352	3.70873	1.74799	2.43224	2.44773	0.699087	1.4217	4.37977	6.86328	8.84838	8.67921	GeneID:501072,Genbank:XM_017596152.1,RGD:1562373	acetyl-Coenzyme A acyltransferase 1B	GO:0005777,GO:0006631,GO:0006635,GO:0010124,GO:0003988,GO:0005515	peroxisome|fatty acid metabolic process|fatty acid beta-oxidation|phenylacetate catabolic process|acetyl-CoA C-acyltransferase activity|protein binding	rno00071,rno00592,rno01040,rno00280,rno04146,rno03320	Fatty acid degradation|alpha-Linolenic acid metabolism|Biosynthesis of unsaturated fatty acids|Valine, leucine and isoleucine degradation|Peroxisome|PPAR signaling pathway
Acaa2	52.589	30.0113	42.4652	36.8519	35.5189	53.3254	42.8008	28.2314	52.4665	32.6464	47.8618	40.4415	GeneID:170465,Genbank:NM_130433.1,RGD:620482	acetyl-CoA acyltransferase 2	GO:1901029,GO:0005739,GO:1902109,GO:0005743,GO:0005759,GO:0006084,GO:0006635,GO:0016747,GO:0071456,GO:0003988	negative regulation of mitochondrial outer membrane permeabilization involved in apoptotic signaling pathway|mitochondrion|negative regulation of mitochondrial membrane permeability involved in apoptotic process|mitochondrial inner membrane|mitochondrial matrix|acetyl-CoA metabolic process|fatty acid beta-oxidation|transferase activity, transferring acyl groups other than amino-acyl groups|cellul…	rno00062,rno00071,rno00280	Fatty acid elongation|Fatty acid degradation|Valine, leucine and isoleucine degradation
Acaca	21.9301	23.6537	25.7519	18.9822	20.1999	19.5993	25.9174	21.3325	22.0305	25.2534	27.9109	26.0019	GeneID:60581,Genbank:NM_022193.1,RGD:621248	acetyl-CoA carboxylase alpha	GO:0005524,GO:0005739,GO:0005829,GO:0006084,GO:0042802,GO:0046872,GO:0051289,GO:0006629,GO:0055088,GO:0071380,GO:2001295,GO:0001650,GO:0001894,GO:0003989,GO:0004075,GO:0006633,GO:0009374,GO:0014070,GO:0015629,GO:0019900,GO:0042493	ATP binding|mitochondrion|cytosol|acetyl-CoA metabolic process|identical protein binding|metal ion binding|protein homotetramerization|lipid metabolic process|lipid homeostasis|cellular response to prostaglandin E stimulus|malonyl-CoA biosynthetic process|fibrillar center|tissue homeostasis|acetyl-CoA carboxylase activity|biotin carboxylase activity|fatty acid biosynthetic process|biotin binding|…	rno00620,rno00640,rno00061,rno04152,rno04910,rno04922	Pyruvate metabolism|Propanoate metabolism|Fatty acid biosynthesis|AMPK signaling pathway|Insulin signaling pathway|Glucagon signaling pathway
Acacb	2.04203	2.01606	1.71076	0.33088	0.244645	0.276138	0.286368	0.36633	0.549063	0.806796	0.785605	0.767111	GeneID:116719,Genbank:XM_017598246.1,RGD:620500	acetyl-CoA carboxylase beta	GO:0097009,GO:0031999,GO:0005524,GO:2001295,GO:0042493,GO:0005634,GO:0042802,GO:0005739,GO:0006084,GO:0006633,GO:0043086,GO:0009374,GO:0046322,GO:0010629,GO:0046872,GO:0010884,GO:0050995,GO:0010906,GO:0003989,GO:0051289,GO:0014070,GO:0060421,GO:0031667	energy homeostasis|negative regulation of fatty acid beta-oxidation|ATP binding|malonyl-CoA biosynthetic process|response to drug|nucleus|identical protein binding|mitochondrion|acetyl-CoA metabolic process|fatty acid biosynthetic process|negative regulation of catalytic activity|biotin binding|negative regulation of fatty acid oxidation|negative regulation of gene expression|metal ion binding|po…	rno00620,rno00640,rno00061,rno04152,rno04910,rno04922,rno04920,rno04931	Pyruvate metabolism|Propanoate metabolism|Fatty acid biosynthesis|AMPK signaling pathway|Insulin signaling pathway|Glucagon signaling pathway|Adipocytokine signaling pathway|Insulin resistance
Acad10	6.40133	3.81083	8.35025	3.74804	5.88892	2.73139	4.60228	5.40731	6.77413	3.89633	6.62614	8.86513	GeneID:304500,Genbank:XM_006249386.3,RGD:1310159	acyl-CoA dehydrogenase family, member 10	GO:0016787,GO:0033539,GO:0050660,GO:0055114,GO:0003995,GO:0005739,GO:0016627	hydrolase activity|fatty acid beta-oxidation using acyl-CoA dehydrogenase|flavin adenine dinucleotide binding|oxidation-reduction process|acyl-CoA dehydrogenase activity|mitochondrion|oxidoreductase activity, acting on the CH-CH group of donors
Acad11	26.4215	25.1727	25.0531	24.7256	26.9077	31.6837	37.2449	32.7001	44.1559	35.2229	36.8489	33.9691	GeneID:315973,Genbank:NM_001108181.1,RGD:1306270	acyl-CoA dehydrogenase family, member 11	GO:0005739,GO:0005777,GO:0017099,GO:0031966,GO:0033539,GO:0050660,GO:0070991,GO:0003995,GO:0004466,GO:0005634	mitochondrion|peroxisome|very-long-chain-acyl-CoA dehydrogenase activity|mitochondrial membrane|fatty acid beta-oxidation using acyl-CoA dehydrogenase|flavin adenine dinucleotide binding|medium-chain-acyl-CoA dehydrogenase activity|acyl-CoA dehydrogenase activity|long-chain-acyl-CoA dehydrogenase activity|nucleus
Acad8	8.85903	7.20558	7.09185	3.75576	3.71561	4.33067	4.11446	5.14653	6.23457	5.50441	6.30057	6.05942	GeneID:367196,Genbank:XM_346003.7,RGD:1564209	acyl-CoA dehydrogenase family, member 8	GO:0003995	acyl-CoA dehydrogenase activity	rno00280	Valine, leucine and isoleucine degradation
Acad9	7.39962	8.24764	7.1075	5.94116	5.81703	7.19205	7.47031	8.64782	8.92331	7.5539	8.35059	5.91951	GeneID:294973,Genbank:XM_006232269.1,RGD:727973	acyl-CoA dehydrogenase family, member 9	GO:0055114,GO:0004466,GO:0070991,GO:0005575,GO:0005634,GO:0005739,GO:0008150,GO:0017099,GO:0030425,GO:0031966,GO:0032981,GO:0042760,GO:0000062,GO:0050660,GO:0001676,GO:0051791,GO:0003674	oxidation-reduction process|long-chain-acyl-CoA dehydrogenase activity|medium-chain-acyl-CoA dehydrogenase activity|cellular_component|nucleus|mitochondrion|biological_process|very-long-chain-acyl-CoA dehydrogenase activity|dendrite|mitochondrial membrane|mitochondrial respiratory chain complex I assembly|very long-chain fatty acid catabolic process|fatty-acyl-CoA binding|flavin adenine dinucleot…
Acadl	108.664	109.017	111.235	83.214	72.2796	87.1604	130.144	83.1943	132.443	141.026	151.144	144.797	GeneID:25287,Genbank:NM_012819.1,RGD:2011	acyl-CoA dehydrogenase, long chain	GO:0046322,GO:0031966,GO:0004466,GO:0050660,GO:0033539,GO:0051289,GO:0005739,GO:0005759,GO:0009062,GO:0055114,GO:0042413,GO:0009409,GO:0090181,GO:0042758,GO:0016401,GO:0000062,GO:0044242,GO:0019254,GO:0001659,GO:0045717,GO:0003995	negative regulation of fatty acid oxidation|mitochondrial membrane|long-chain-acyl-CoA dehydrogenase activity|flavin adenine dinucleotide binding|fatty acid beta-oxidation using acyl-CoA dehydrogenase|protein homotetramerization|mitochondrion|mitochondrial matrix|fatty acid catabolic process|oxidation-reduction process|carnitine catabolic process|response to cold|regulation of cholesterol metabol…	rno00071,rno03320	Fatty acid degradation|PPAR signaling pathway
Acadm	21.7766	19.9672	20.3857	14.5136	12.316	14.2346	14.5206	13.8577	15.5378	20.5808	18.3607	19.7951	GeneID:24158,Genbank:NM_016986.2,RGD:2012	acyl-CoA dehydrogenase, C-4 to C-12 straight chain	GO:0005739,GO:0005759,GO:0005978,GO:0006082,GO:0009791,GO:0006111,GO:0016491,GO:0016607,GO:0006635,GO:0016853,GO:0019254,GO:0050660,GO:0030424,GO:0031966,GO:0051289,GO:0051384,GO:0051791,GO:0051793,GO:0000062,GO:0001889,GO:0055007,GO:0003995,GO:0007507,GO:0007584,GO:0009409,GO:0033539,GO:0009437,GO:0009725,GO:0042493,GO:0042594,GO:0042802,GO:0055114,GO:0045329,GO:0070991,GO:0046688	mitochondrion|mitochondrial matrix|glycogen biosynthetic process|organic acid metabolic process|post-embryonic development|regulation of gluconeogenesis|oxidoreductase activity|nuclear speck|fatty acid beta-oxidation|isomerase activity|carnitine metabolic process, CoA-linked|flavin adenine dinucleotide binding|axon|mitochondrial membrane|protein homotetramerization|response to glucocorticoid|medi…	rno00640,rno00071,rno00280,rno00410,rno03320	Propanoate metabolism|Fatty acid degradation|Valine, leucine and isoleucine degradation|beta-Alanine metabolism|PPAR signaling pathway
Acads	9.07531	9.11072	8.56427	10.7784	8.70506	9.91523	13.9639	9.82631	15.2751	10.8496	9.9099	11.1663	GeneID:64304,Genbank:NM_022512.2,RGD:620514	acyl-CoA dehydrogenase, C-2 to C-3 short chain	GO:0050660,GO:0006635,GO:0003995,GO:0051289,GO:0031966,GO:0051384,GO:0033539,GO:0004085,GO:0005654,GO:0005739,GO:0042594,GO:0046359,GO:0000062,GO:0005759	flavin adenine dinucleotide binding|fatty acid beta-oxidation|acyl-CoA dehydrogenase activity|protein homotetramerization|mitochondrial membrane|response to glucocorticoid|fatty acid beta-oxidation using acyl-CoA dehydrogenase|butyryl-CoA dehydrogenase activity|nucleoplasm|mitochondrion|response to starvation|butyrate catabolic process|fatty-acyl-CoA binding|mitochondrial matrix	rno00650,rno00071,rno00280	Butanoate metabolism|Fatty acid degradation|Valine, leucine and isoleucine degradation
Acadsb	7.34113	6.79145	7.32413	2.11678	2.22887	2.16183	1.93888	2.59881	3.24315	7.06112	5.55337	6.97718	GeneID:25618,Genbank:XM_008759867.2,RGD:2013	acyl-CoA dehydrogenase, short/branched chain	GO:0005739,GO:0005759,GO:0006631,GO:0006635,GO:0006637,GO:0009055,GO:0016937,GO:0022900,GO:0050660,GO:0003995,GO:0055114	mitochondrion|mitochondrial matrix|fatty acid metabolic process|fatty acid beta-oxidation|acyl-CoA metabolic process|electron transfer activity|short-branched-chain-acyl-CoA dehydrogenase activity|electron transport chain|flavin adenine dinucleotide binding|acyl-CoA dehydrogenase activity|oxidation-reduction process	rno00071,rno00280	Fatty acid degradation|Valine, leucine and isoleucine degradation
Acadvl	42.694	41.0864	38.6166	32.506	29.8139	30.912	33.9606	31.4233	41.8091	39.3905	39.4608	38.3557	GeneID:25363,Genbank:NM_012891.2,RGD:2014	acyl-CoA dehydrogenase, very long chain	GO:0005730,GO:0005739,GO:0005743,GO:0005829,GO:0033539,GO:0006635,GO:0042645,GO:0009062,GO:0042760,GO:0045717,GO:0046322,GO:0000062,GO:0001659,GO:0003995,GO:0004466,GO:0005634,GO:0009409,GO:0017099,GO:0030855,GO:0050660,GO:0031966,GO:0090181	nucleolus|mitochondrion|mitochondrial inner membrane|cytosol|fatty acid beta-oxidation using acyl-CoA dehydrogenase|fatty acid beta-oxidation|mitochondrial nucleoid|fatty acid catabolic process|very long-chain fatty acid catabolic process|negative regulation of fatty acid biosynthetic process|negative regulation of fatty acid oxidation|fatty-acyl-CoA binding|temperature homeostasis|acyl-CoA dehyd…	rno00071	Fatty acid degradation
Acan	0.0181519	0.0381522	0.019954	0.0539493	0.0542746	0.144932	0.00319925	0.0786162	0.0190575	0.00702003	0.00372202	0.0034028	GeneID:58968,Genbank:NM_022190.1,RGD:68358	aggrecan	GO:0005540,GO:0005578,GO:0005604,GO:0005615,GO:0014070,GO:0021510,GO:0030166,GO:0007155,GO:0030199,GO:0030246,GO:0030336,GO:0031012,GO:0001501,GO:0001502,GO:0001503,GO:0002063,GO:0005201,GO:0005509,GO:0007417,GO:0007507,GO:0009314,GO:0009612,GO:0009629,GO:0042493,GO:0009749,GO:0043005,GO:0010259,GO:0043025,GO:0010447,GO:0060591,GO:0071363,GO:0072534	hyaluronic acid binding|proteinaceous extracellular matrix|basement membrane|extracellular space|response to organic cyclic compound|spinal cord development|proteoglycan biosynthetic process|cell adhesion|collagen fibril organization|carbohydrate binding|negative regulation of cell migration|extracellular matrix|skeletal system development|cartilage condensation|ossification|chondrocyte developme…
Acap1	0.561151	1.10146	0.859864	1.81941	0.810827	1.18682	9.4676	1.67179	3.55018	0.473493	0.700838	1.10932	GeneID:287443,Genbank:NM_001105796.2,RGD:1305360	ArfGAP with coiled-coil, ankyrin repeat and PH domains 1	GO:0005829,GO:0016020,GO:0016192,GO:0031267,GO:0032012,GO:0043231,GO:0043547,GO:0046872,GO:0005096,GO:0005737	cytosol|membrane|vesicle-mediated transport|small GTPase binding|regulation of ARF protein signal transduction|intracellular membrane-bounded organelle|positive regulation of GTPase activity|metal ion binding|GTPase activator activity|cytoplasm	rno04144	Endocytosis
Acap2	34.1604	35.6036	35.5424	30.3632	27.2755	28.4087	37.0597	28.0841	34.6658	36.7937	36.2677	38.5814	GeneID:619382,Genbank:XM_017598065.1,RGD:1562939	ArfGAP with coiled-coil, ankyrin repeat and PH domains 2	GO:0080025,GO:0005829,GO:0010008,GO:1990090,GO:0016020,GO:0016192,GO:0017137,GO:0031267,GO:0032012,GO:0036010,GO:0043231,GO:0005096,GO:0043547,GO:0046872,GO:0005737	phosphatidylinositol-3,5-bisphosphate binding|cytosol|endosome membrane|cellular response to nerve growth factor stimulus|membrane|vesicle-mediated transport|Rab GTPase binding|small GTPase binding|regulation of ARF protein signal transduction|protein localization to endosome|intracellular membrane-bounded organelle|GTPase activator activity|positive regulation of GTPase activity|metal ion bindin…	rno04144	Endocytosis
Acap3	7.39775	7.45913	6.18901	4.79159	6.63548	4.73192	4.18141	5.02469	5.35767	6.9335	6.6834	6.85817	GeneID:313772,Genbank:NM_001107999.1,RGD:1310711	ArfGAP with coiled-coil, ankyrin repeat and PH domains 3	GO:0005829,GO:0016020,GO:0016192,GO:0031267,GO:0032012,GO:0043231,GO:0043547,GO:0046872,GO:0005096,GO:0005737	cytosol|membrane|vesicle-mediated transport|small GTPase binding|regulation of ARF protein signal transduction|intracellular membrane-bounded organelle|positive regulation of GTPase activity|metal ion binding|GTPase activator activity|cytoplasm	rno04144	Endocytosis
Acat1	41.5257	42.8641	43.3267	31.4109	32.6653	33.736	29.6712	29.3095	43.3814	54.6381	54.7261	50.8205	GeneID:25014,Genbank:NM_017075.2,RGD:2016	acetyl-CoA acetyltransferase 1	GO:0042803,GO:0007420,GO:0003985,GO:0046356,GO:0009725,GO:0003988,GO:0046872,GO:0014070,GO:0005739,GO:0046952,GO:0005759,GO:0015936,GO:0005777,GO:0050662,GO:0015937,GO:0005829,GO:0051260,GO:0016830,GO:0006085,GO:0060612,GO:0016885,GO:0006550,GO:0001889,GO:0072229,GO:0019899,GO:0006635,GO:1902860,GO:0042594,GO:0006696	protein homodimerization activity|brain development|acetyl-CoA C-acetyltransferase activity|acetyl-CoA catabolic process|response to hormone|acetyl-CoA C-acyltransferase activity|metal ion binding|response to organic cyclic compound|mitochondrion|ketone body catabolic process|mitochondrial matrix|coenzyme A metabolic process|peroxisome|coenzyme binding|coenzyme A biosynthetic process|cytosol|prot…	rno00620,rno00630,rno00640,rno00650,rno00071,rno00072,rno00280,rno00310,rno00380,rno00900	Pyruvate metabolism|Glyoxylate and dicarboxylate metabolism|Propanoate metabolism|Butanoate metabolism|Fatty acid degradation|Synthesis and degradation of ketone bodies|Valine, leucine and isoleucine degradation|Lysine degradation|Tryptophan metabolism|Terpenoid backbone biosynthesis
Acat2	6.0692	8.863	6.35992	8.29176	13.189	10.086	17.4255	11.9036	6.38101	9.43532	7.73552	7.24146	GeneID:308100,Genbank:NM_001006995.1,RGD:1359366	acetyl-CoA acetyltransferase 2	GO:0031670,GO:0003988,GO:0045797,GO:0005634,GO:0046952,GO:0005730,GO:0005737,GO:0005739,GO:0005777,GO:0005829,GO:0071398,GO:0006635,GO:0006695,GO:0007420,GO:0001889,GO:0016747,GO:0003985,GO:0019408	cellular response to nutrient|acetyl-CoA C-acyltransferase activity|positive regulation of intestinal cholesterol absorption|nucleus|ketone body catabolic process|nucleolus|cytoplasm|mitochondrion|peroxisome|cytosol|cellular response to fatty acid|fatty acid beta-oxidation|cholesterol biosynthetic process|brain development|liver development|transferase activity, transferring acyl groups other tha…	rno00620,rno00630,rno00640,rno00650,rno00071,rno00072,rno00280,rno00310,rno00380,rno00900,rno04975	Pyruvate metabolism|Glyoxylate and dicarboxylate metabolism|Propanoate metabolism|Butanoate metabolism|Fatty acid degradation|Synthesis and degradation of ketone bodies|Valine, leucine and isoleucine degradation|Lysine degradation|Tryptophan metabolism|Terpenoid backbone biosynthesis|Fat digestion and absorption
Acat2l1	2.90943	2.64723	3.36325	2.65074	3.21588	3.25419	4.16634	2.83767	2.94808	3.53294	2.45021	2.77573	GeneID:365096,Genbank:XM_003748697.4,RGD:1562948	acetyl-CoA acetyltransferase 2-like 1	GO:0016747	transferase activity, transferring acyl groups other than amino-acyl groups
Acbd3	19.2547	22.1511	19.4124	23.7291	22.7	23.9609	24.3198	22.9421	21.8913	19.4538	20.3602	20.3607	GeneID:289312,Genbank:NM_182843.1,RGD:727851	acyl-CoA binding domain containing 3	GO:0000139,GO:0005739,GO:0005794,GO:0006694,GO:0034237,GO:0000062	Golgi membrane|mitochondrion|Golgi apparatus|steroid biosynthetic process|protein kinase A regulatory subunit binding|fatty-acyl-CoA binding
Acbd4	12.6576	11.6074	12.3943	5.18858	4.96035	5.60808	8.1033	7.23797	10.3689	12.2553	11.7417	12.7028	GeneID:303577,Genbank:XM_008768284.2,RGD:1308404	acyl-CoA binding domain containing 4	GO:0000062,GO:0008289	fatty-acyl-CoA binding|lipid binding
Acbd5	9.80159	9.05327	9.06654	7.77118	7.75753	7.7655	7.83903	7.30544	9.67133	10.9943	10.7686	11.0473	GeneID:307170,Genbank:XM_006254345.3,RGD:1309411	acyl-CoA binding domain containing 5	GO:0005777,GO:0005778,GO:0008289,GO:0016021,GO:0016236,GO:0030242,GO:0035973,GO:0000062,GO:0005634,GO:0005654	peroxisome|peroxisomal membrane|lipid binding|integral component of membrane|macroautophagy|autophagy of peroxisome|aggrephagy|fatty-acyl-CoA binding|nucleus|nucleoplasm
Acbd6	7.62069	7.01376	6.29443	4.99823	5.0073	4.5148	4.40189	4.37852	5.44609	9.48793	11.0728	10.7079	GeneID:289125,Genbank:XM_006250033.3,RGD:1305030	acyl-CoA binding domain containing 6	GO:0000062,GO:0005737,GO:0008289	fatty-acyl-CoA binding|cytoplasm|lipid binding
Acbd7	0.0062794	0.0539926	0.0460185	0.0419917	0.0247046	0.0259329	0.0221346	0.0181307	0.0235452	0.0485695	0.0386274	0.0294287	GeneID:361277,Genbank:XM_006254269.3,RGD:1564164	acyl-CoA binding domain containing 7	GO:0000062	fatty-acyl-CoA binding
Accs	1.92437	2.11427	1.77166	3.21002	2.48326	2.62262	2.67942	2.76426	2.96562	2.43734	2.52537	2.48013	GeneID:311218,Genbank:NM_001267534.1,RGD:1309314	1-aminocyclopropane-1-carboxylate synthase homolog	GO:0042802,GO:0009058,GO:0016847,GO:0030170	identical protein binding|biosynthetic process|1-aminocyclopropane-1-carboxylate synthase activity|pyridoxal phosphate binding
Accsl	0.0557582	0.181118	0.163449	0.190576	0.122845	0.222596	0.186718	0.362234	0.0836283	0.0646912	0.137197	0.12543	GeneID:690470,Genbank:XM_008762035.2,RGD:1596039	1-aminocyclopropane-1-carboxylate synthase-like	GO:0003824,GO:0009058,GO:0030170	catalytic activity|biosynthetic process|pyridoxal phosphate binding
Acd	14.8455	14.4803	13.2986	12.2762	10.8788	11.5982	15.3822	12.5249	13.4269	13.1502	12.0663	14.8868	GeneID:307798,Genbank:XM_008772496.2,RGD:1565053	adrenocortical dysplasia homolog	GO:0044877,GO:0001501,GO:0051973,GO:0001655,GO:0060381,GO:0006886,GO:0016233,GO:0016604,GO:0030326,GO:0070182,GO:0031848,GO:0070187,GO:0032202,GO:0070198,GO:0032211,GO:0070200,GO:0032212,GO:0000723,GO:0035282,GO:0000783,GO:0042162,GO:0000784	protein-containing complex binding|skeletal system development|positive regulation of telomerase activity|urogenital system development|positive regulation of single-stranded telomeric DNA binding|intracellular protein transport|telomere capping|nuclear body|embryonic limb morphogenesis|DNA polymerase binding|protection from non-homologous end joining at telomere|shelterin complex|telomere assemb…
Ace	9.88655	11.065	8.9362	13.6875	11.0392	13.0014	14.6366	11.7833	11.0527	7.56645	6.26296	8.28734	GeneID:24310,Genbank:NM_012544.1,RGD:2493	angiotensin I converting enzyme	GO:1903597,GO:1904045,GO:2000170,GO:0003084,GO:0003779,GO:0004175,GO:0004180,GO:0005615,GO:0005737,GO:0008144,GO:0005764,GO:0008217,GO:0005768,GO:0008233,GO:0008237,GO:0010608,GO:0010629,GO:0008238,GO:0010815,GO:0014910,GO:0016021,GO:0001666,GO:0032496,GO:0019233,GO:0001822,GO:0034616,GO:0030324,GO:0035814,GO:0031100,GO:0042310,GO:0002446,GO:0042447,GO:0003081,GO:0042493,GO:0060047,GO:0042755,GO:…	negative regulation of gap junction assembly|cellular response to aldosterone|positive regulation of peptidyl-cysteine S-nitrosylation|positive regulation of systemic arterial blood pressure|actin binding|endopeptidase activity|carboxypeptidase activity|extracellular space|cytoplasm|drug binding|lysosome|regulation of blood pressure|endosome|peptidase activity|metallopeptidase activity|posttransc…	rno04924,rno04614,rno05410,rno05142	Renin secretion|Renin-angiotensin system|Hypertrophic cardiomyopathy (HCM)|Chagas disease (American trypanosomiasis)
Ace2	11.3948	11.473	13.3217	7.0487	9.67355	9.33019	5.85676	9.84801	11.5882	12.3212	13.9761	14.4736	GeneID:302668,Genbank:NM_001012006.1,RGD:728890	angiotensin I converting enzyme 2	GO:0004180,GO:0004181,GO:0005576,GO:0005615,GO:0015827,GO:0005737,GO:0016020,GO:0005886,GO:0016021,GO:0032800,GO:0046718,GO:0046813,GO:0046872,GO:0001618,GO:0003051,GO:0003081,GO:0004175,GO:0006508,GO:0008237,GO:0008241,GO:0048662,GO:0009986,GO:0060135,GO:0060452,GO:0070373,GO:1903598,GO:1903779	carboxypeptidase activity|metallocarboxypeptidase activity|extracellular region|extracellular space|tryptophan transport|cytoplasm|membrane|plasma membrane|integral component of membrane|receptor biosynthetic process|viral entry into host cell|receptor-mediated virion attachment to host cell|metal ion binding|virus receptor activity|angiotensin-mediated drinking behavior|regulation of systemic ar…	rno04614,rno04974	Renin-angiotensin system|Protein digestion and absorption
Ace3	0.00510966	0	0	0.00759319	0	0	0.00450284	0.0147533	0.022991	0	0	0.00478933	GeneID:498012,Genbank:XM_017597472.1,RGD:1561299	angiotensin I converting enzyme (peptidyl-dipeptidase A) 3	GO:0008237,GO:0008241,GO:0016021,GO:0046872,GO:0001669,GO:0004180,GO:0006508	metallopeptidase activity|peptidyl-dipeptidase activity|integral component of membrane|metal ion binding|acrosomal vesicle|carboxypeptidase activity|proteolysis	rno04924,rno04614,rno05410,rno05142	Renin secretion|Renin-angiotensin system|Hypertrophic cardiomyopathy (HCM)|Chagas disease (American trypanosomiasis)
Acer1	0.145431	0.0595463	0.085644	0.146651	0.0326949	0.0715009	0.0549257	0.202456	0.280445	0.281218	0.266254	0.428416	GeneID:301118,Genbank:NM_001106875.1,RGD:1588582	alkaline ceramidase 1	GO:0010446,GO:0016021,GO:0017040,GO:0019216,GO:0030148,GO:0030154,GO:0030216,GO:0046512,GO:0046514,GO:0071277,GO:0071633,GO:0005783,GO:0102121,GO:0006665,GO:0008544	response to alkaline pH|integral component of membrane|N-acylsphingosine amidohydrolase activity|regulation of lipid metabolic process|sphingolipid biosynthetic process|cell differentiation|keratinocyte differentiation|sphingosine biosynthetic process|ceramide catabolic process|cellular response to calcium ion|dihydroceramidase activity|endoplasmic reticulum|ceramidase activity|sphingolipid metab…	rno00600,rno04071	Sphingolipid metabolism|Sphingolipid signaling pathway
Acer2	160.501	221.149	185.682	93.1612	160.587	97.6704	57.9103	79.0305	85.3217	224.664	208.122	179.472	GeneID:313339,Genbank:XM_006238363.3,RGD:1304629	alkaline ceramidase 2	GO:0090285,GO:0005794,GO:0102121,GO:0006672,GO:0006919,GO:0008150,GO:0008284,GO:0010942,GO:0017040,GO:0030173,GO:0032526,GO:0033629,GO:0035690,GO:0001953,GO:0046512,GO:0003674,GO:0071633,GO:0005575	negative regulation of protein glycosylation in Golgi|Golgi apparatus|ceramidase activity|ceramide metabolic process|activation of cysteine-type endopeptidase activity involved in apoptotic process|biological_process|positive regulation of cell proliferation|positive regulation of cell death|N-acylsphingosine amidohydrolase activity|integral component of Golgi membrane|response to retinoic acid|n…	rno00600,rno04071	Sphingolipid metabolism|Sphingolipid signaling pathway
Acer3	24.7721	24.4238	27.4557	23.7417	24.2207	24.0348	26.7348	23.2336	23.9935	29.4711	32.5377	29.8596	GeneID:499210,Genbank:XM_008759809.2,RGD:1561254	alkaline ceramidase 3	GO:0008150,GO:0008284,GO:0030173,GO:0030176,GO:0046512,GO:0070774,GO:0071602,GO:0003674,GO:0005575,GO:0006672	biological_process|positive regulation of cell proliferation|integral component of Golgi membrane|integral component of endoplasmic reticulum membrane|sphingosine biosynthetic process|phytoceramidase activity|phytosphingosine biosynthetic process|molecular_function|cellular_component|ceramide metabolic process	rno00600	Sphingolipid metabolism
Ache	1.52645	1.48167	1.06273	1.31566	1.25874	1.28602	2.73339	1.11948	2.21617	1.79462	2.04074	2.0374	GeneID:83817,Genbank:NM_172009.1,RGD:69313	acetylcholinesterase	GO:0004104,GO:0005518,GO:0005576,GO:0005605,GO:0006581,GO:0005615,GO:0005635,GO:0007155,GO:0007416,GO:0008291,GO:0030425,GO:0009897,GO:0030673,GO:0009986,GO:0031225,GO:0031594,GO:0031623,GO:0001507,GO:0043621,GO:0033265,GO:0001919,GO:0042166,GO:0044306,GO:0002076,GO:0045202,GO:0003990,GO:0045211,GO:0045212,GO:0048237,GO:0048471,GO:0005737,GO:0005788,GO:0005791,GO:0005794,GO:0005886,GO:0016020,GO:…	cholinesterase activity|collagen binding|extracellular region|basal lamina|acetylcholine catabolic process|extracellular space|nuclear envelope|cell adhesion|synapse assembly|acetylcholine metabolic process|dendrite|external side of plasma membrane|axolemma|cell surface|anchored component of membrane|neuromuscular junction|receptor internalization|acetylcholine catabolic process in synaptic cleft…	rno00564,rno04725	Glycerophospholipid metabolism|Cholinergic synapse
Acin1	42.0854	38.789	42.8054	31.9003	31.3678	30.9065	41.4313	31.9231	39.9529	33.3438	36.5397	37.5048	GeneID:305884,Genbank:XM_006251962.3,RGD:1311945	apoptotic chromatin condensation inducer 1	GO:0005829,GO:0005886,GO:0016607,GO:0030218,GO:0030263,GO:0035145,GO:0043065,GO:0045657,GO:0048025,GO:0005634,GO:0061574,GO:0005654,GO:0005730	cytosol|plasma membrane|nuclear speck|erythrocyte differentiation|apoptotic chromosome condensation|exon-exon junction complex|positive regulation of apoptotic process|positive regulation of monocyte differentiation|negative regulation of mRNA splicing, via spliceosome|nucleus|ASAP complex|nucleoplasm|nucleolus	rno03040,rno03013,rno03015	Spliceosome|RNA transport|mRNA surveillance pathway
Ackr1	12.7925	16.0879	13.7783	17.2062	13.2677	12.8286	9.70811	14.7843	6.89576	9.36865	10.0959	11.0001	GeneID:689105,Genbank:XM_002728033.4,RGD:1596198	atypical chemokine receptor 1	GO:0008150,GO:0019957,GO:0032642,GO:0003674,GO:0005575,GO:0006954	biological_process|C-C chemokine binding|regulation of chemokine production|molecular_function|cellular_component|inflammatory response	rno05144	Malaria
Ackr2	4.44907	5.70332	5.52946	0.473661	2.88941	0.356509	1.02991	1.21749	0.652349	5.73325	6.41314	4.65563	GeneID:140473,Genbank:XM_017595421.1,RGD:620323	atypical chemokine receptor 2	GO:0043231,GO:0006954,GO:0005654,GO:0055037,GO:0007165,GO:0070098,GO:0007186,GO:0005769,GO:0005829,GO:0005884,GO:0016493,GO:0005886,GO:0019957,GO:0005887,GO:0005044,GO:0031965,GO:0006898,GO:0006935	intracellular membrane-bounded organelle|inflammatory response|nucleoplasm|recycling endosome|signal transduction|chemokine-mediated signaling pathway|G-protein coupled receptor signaling pathway|early endosome|cytosol|actin filament|C-C chemokine receptor activity|plasma membrane|C-C chemokine binding|integral component of plasma membrane|scavenger receptor activity|nuclear membrane|receptor-med…
Ackr3	41.8338	47.8209	49.1868	36.9379	67.4275	36.3741	28.7702	51.8503	22.0717	43.6806	51.8855	37.9417	GeneID:84348,Genbank:XM_006245479.3,RGD:620601	atypical chemokine receptor 3	GO:0031623,GO:0007186,GO:0005044,GO:0043231,GO:0009986,GO:0005634,GO:0048471,GO:0005737,GO:0055037,GO:0005768,GO:0005769,GO:0005886,GO:0015026,GO:0070098,GO:0016021,GO:0070374,GO:0016494,GO:0005905,GO:0019958,GO:0001525,GO:1902230,GO:0006935,GO:0001570,GO:1905322,GO:0007155	receptor internalization|G-protein coupled receptor signaling pathway|scavenger receptor activity|intracellular membrane-bounded organelle|cell surface|nucleus|perinuclear region of cytoplasm|cytoplasm|recycling endosome|endosome|early endosome|plasma membrane|coreceptor activity|chemokine-mediated signaling pathway|integral component of membrane|positive regulation of ERK1 and ERK2 cascade|C-X-C…	rno04060	Cytokine-cytokine receptor interaction
Ackr4	2.90861	2.28279	2.19426	2.23569	4.1873	2.75327	3.18188	5.20837	5.08804	3.82751	4.40347	4.14746	GeneID:685243,Genbank:XM_006243689.3,RGD:1596453	atypical chemokine receptor 4	GO:0006935,GO:0007186,GO:0016021,GO:0019956,GO:0070098,GO:0004950,GO:0005044,GO:0006898	chemotaxis|G-protein coupled receptor signaling pathway|integral component of membrane|chemokine binding|chemokine-mediated signaling pathway|chemokine receptor activity|scavenger receptor activity|receptor-mediated endocytosis
Acly	59.9278	71.3807	64.2853	61.8451	72.0588	66.1749	74.2315	63.5301	55.1791	64.3829	62.6695	61.14	GeneID:24159,Genbank:NM_001111095.1,RGD:2018	ATP citrate lyase	GO:0006633,GO:0006085,GO:0003878,GO:0005524,GO:0008610,GO:0006101,GO:0005654,GO:0005737,GO:0005829,GO:0005886,GO:0009346,GO:0006107,GO:0016829,GO:0006084,GO:0046872,GO:0006629,GO:0048037	fatty acid biosynthetic process|acetyl-CoA biosynthetic process|ATP citrate synthase activity|ATP binding|lipid biosynthetic process|citrate metabolic process|nucleoplasm|cytoplasm|cytosol|plasma membrane|citrate lyase complex|oxaloacetate metabolic process|lyase activity|acetyl-CoA metabolic process|metal ion binding|lipid metabolic process|cofactor binding	rno00020	Citrate cycle (TCA cycle)
Acmsd	0.406956	0.0971988	0.116499	0.113392	0.0600397	0.0700275	0.0224141	0.201956	0.419628	0.295096	0.15646	0.143041	GeneID:171385,Genbank:NM_134372.1,RGD:620868	aminocarboxymuconate semialdehyde decarboxylase	GO:0016831,GO:0001760,GO:0046874,GO:0005829,GO:0051259,GO:0006568,GO:1904985,GO:0006769,GO:0008270,GO:0016787	carboxy-lyase activity|aminocarboxymuconate-semialdehyde decarboxylase activity|quinolinate metabolic process|cytosol|protein complex oligomerization|tryptophan metabolic process|negative regulation of quinolinate biosynthetic process|nicotinamide metabolic process|zinc ion binding|hydrolase activity	rno00380	Tryptophan metabolism
Acnat1	0	0	0	0	0	0	0	0	0.00450998	0	0	0	GeneID:681043,Genbank:XM_008763718.2,RGD:1584701	acyl-coenzyme A amino acid N-acyltransferase 1	GO:0047617,GO:0005777,GO:0006631,GO:0006637	acyl-CoA hydrolase activity|peroxisome|fatty acid metabolic process|acyl-CoA metabolic process
Acnat2	0	0	0	0	0	0	0	0	0.00954665	0	0	0	GeneID:313220,Genbank:NM_001014063.1,RGD:1359532	acyl-coenzyme A amino acid N-acyltransferase 2	GO:0006631,GO:0006637,GO:0016410,GO:0016790,GO:0047617,GO:0005777	fatty acid metabolic process|acyl-CoA metabolic process|N-acyltransferase activity|thiolester hydrolase activity|acyl-CoA hydrolase activity|peroxisome
Aco1	38.2833	40.0076	39.0574	47.1989	42.9409	48.2173	53.6642	45.6878	61.0428	45.267	47.5171	46.6297	GeneID:50655,Genbank:NM_017321.1,RGD:2019	aconitase 1	GO:0005739,GO:0005783,GO:0005794,GO:0009791,GO:0005829,GO:0010040,GO:0010468,GO:0030350,GO:0043231,GO:0001889,GO:0003723,GO:0003994,GO:0005737,GO:0006099,GO:0006101,GO:0006417,GO:0006879,GO:0046872,GO:0048027,GO:0050892,GO:0051536,GO:0051538,GO:0051539	mitochondrion|endoplasmic reticulum|Golgi apparatus|post-embryonic development|cytosol|response to iron(II) ion|regulation of gene expression|iron-responsive element binding|intracellular membrane-bounded organelle|liver development|RNA binding|aconitate hydratase activity|cytoplasm|tricarboxylic acid cycle|citrate metabolic process|regulation of translation|cellular iron ion homeostasis|metal io…	rno00020,rno00630	Citrate cycle (TCA cycle)|Glyoxylate and dicarboxylate metabolism
Aco2	59.5222	59.3247	59.4951	51.9839	51.6971	56.7527	54.6941	53.5438	55.1417	57.5783	54.697	56.4768	GeneID:79250,Genbank:NM_024398.2,RGD:621360	aconitase 2	GO:0035900,GO:0003994,GO:0043209,GO:0005506,GO:0051538,GO:0005515,GO:0005739,GO:0006099,GO:0051539,GO:0006101,GO:0001889,GO:0006102	response to isolation stress|aconitate hydratase activity|myelin sheath|iron ion binding|3 iron, 4 sulfur cluster binding|protein binding|mitochondrion|tricarboxylic acid cycle|4 iron, 4 sulfur cluster binding|citrate metabolic process|liver development|isocitrate metabolic process	rno00020,rno00630	Citrate cycle (TCA cycle)|Glyoxylate and dicarboxylate metabolism
Acot1	1.96149	2.62049	2.13284	0.699093	1.36772	1.09765	0.224851	0.644623	1.38724	2.68278	3.22086	3.27346	GeneID:50559,Genbank:NM_031315.2,RGD:70894	acyl-CoA thioesterase 1	GO:0006631,GO:0006637,GO:0016290,GO:0047617,GO:0052689,GO:0102991,GO:0005737,GO:0005829,GO:0006629	fatty acid metabolic process|acyl-CoA metabolic process|palmitoyl-CoA hydrolase activity|acyl-CoA hydrolase activity|carboxylic ester hydrolase activity|myristoyl-CoA hydrolase activity|cytoplasm|cytosol|lipid metabolic process	rno00062,rno01040	Fatty acid elongation|Biosynthesis of unsaturated fatty acids
Acot11	7.15408	5.83832	6.08145	4.79594	4.80844	4.50188	6.01249	4.26057	5.89872	6.44229	6.02624	8.0513	GeneID:100363074,Genbank:NM_001271383.1,RGD:2324815	acyl-CoA thioesterase 11	GO:0006637,GO:0008289,GO:0009266,GO:0009409,GO:0047617,GO:0005829,GO:0006631	acyl-CoA metabolic process|lipid binding|response to temperature stimulus|response to cold|acyl-CoA hydrolase activity|cytosol|fatty acid metabolic process
Acot12	0.010341	0	0.018946	0.0192091	0.0040684	0	0.00455646	0.00746451	0	0.00499907	0	0	GeneID:170570,Genbank:XM_008760628.2,RGD:619752	acyl-CoA thioesterase 12	GO:0006637,GO:0003986,GO:0008289,GO:0005524,GO:0047617,GO:0005829,GO:0052689,GO:0006084,GO:0006090,GO:0006631	acyl-CoA metabolic process|acetyl-CoA hydrolase activity|lipid binding|ATP binding|acyl-CoA hydrolase activity|cytosol|carboxylic ester hydrolase activity|acetyl-CoA metabolic process|pyruvate metabolic process|fatty acid metabolic process	rno00620	Pyruvate metabolism
Acot13	7.9303	8.06207	8.44437	5.03624	4.93327	6.11162	7.37675	5.62651	7.54822	9.60056	8.96436	6.7343	GeneID:291135,Genbank:NM_001106111.1,RGD:1306513	acyl-CoA thioesterase 13	GO:0047617,GO:0051289,GO:0005737,GO:0005739	acyl-CoA hydrolase activity|protein homotetramerization|cytoplasm|mitochondrion
Acot2	8.89639	9.93338	10.0116	5.36137	7.037	5.63378	5.26332	5.71635	8.95797	11.5643	12.1265	10.9326	GeneID:192272,Genbank:XM_006240320.3,RGD:621055	acyl-CoA thioesterase 2	GO:0042493,GO:0005102,GO:0042760,GO:0005739,GO:0047617,GO:0005759,GO:0006631,GO:0006637,GO:0052689,GO:0009725,GO:0070849,GO:0016290,GO:0000038,GO:0102991,GO:0016790,GO:0001666,GO:0031667,GO:0001676	response to drug|signaling receptor binding|very long-chain fatty acid catabolic process|mitochondrion|acyl-CoA hydrolase activity|mitochondrial matrix|fatty acid metabolic process|acyl-CoA metabolic process|carboxylic ester hydrolase activity|response to hormone|response to epidermal growth factor|palmitoyl-CoA hydrolase activity|very long-chain fatty acid metabolic process|myristoyl-CoA hydrola…	rno00062,rno01040,rno04913	Fatty acid elongation|Biosynthesis of unsaturated fatty acids|Ovarian Steroidogenesis
Acot3	8.42333	7.85176	7.68111	4.29931	5.2479	4.22942	3.97096	4.01962	6.06722	9.88918	10.1715	8.69919	GeneID:314304,Genbank:NM_001108041.1,RGD:1564089	acyl-CoA thioesterase 3	GO:0016790,GO:0047617,GO:0006631,GO:0006637	thiolester hydrolase activity|acyl-CoA hydrolase activity|fatty acid metabolic process|acyl-CoA metabolic process	rno00062,rno01040	Fatty acid elongation|Biosynthesis of unsaturated fatty acids
Acot4	0.438853	0.335415	0.527088	0.123185	0.214859	0.268502	0.128912	0.161909	0.204776	0.612879	0.689892	0.703849	GeneID:681337,Genbank:NM_001109440.1,RGD:1596753	acyl-CoA thioesterase 4	GO:0047617,GO:0005102,GO:0005777,GO:0006104,GO:0006631,GO:0006637,GO:0019605,GO:0032788,GO:0032789,GO:0043648,GO:0000038,GO:0043649,GO:0001676,GO:0046459,GO:0004778	acyl-CoA hydrolase activity|signaling receptor binding|peroxisome|succinyl-CoA metabolic process|fatty acid metabolic process|acyl-CoA metabolic process|butyrate metabolic process|saturated monocarboxylic acid metabolic process|unsaturated monocarboxylic acid metabolic process|dicarboxylic acid metabolic process|very long-chain fatty acid metabolic process|dicarboxylic acid catabolic process|long…	rno00062,rno01040	Fatty acid elongation|Biosynthesis of unsaturated fatty acids
Acot5	0	0.0129129	0	0.0200855	0.0212701	0	0.0238218	0.0390254	0.0101359	0	0.0138572	0.0380061	GeneID:503049,Genbank:NM_001079709.1,RGD:1565917	acyl-CoA thioesterase 5	GO:0005829,GO:0006631,GO:0006637,GO:0032788,GO:0032789,GO:0047617,GO:0000038,GO:0001676,GO:0005737	cytosol|fatty acid metabolic process|acyl-CoA metabolic process|saturated monocarboxylic acid metabolic process|unsaturated monocarboxylic acid metabolic process|acyl-CoA hydrolase activity|very long-chain fatty acid metabolic process|long-chain fatty acid metabolic process|cytoplasm	rno00062,rno01040	Fatty acid elongation|Biosynthesis of unsaturated fatty acids
Acot6	0.0319143	0.0457352	0.0146177	0.0118565	0.0125558	0	0.0421863	0	0.0239332	0.015428	0.0327198	0.0448704	GeneID:299193,Genbank:NM_001305285.1,RGD:1309669	acyl-CoA thioesterase 6	GO:0006637,GO:0047617,GO:0005737,GO:0005829,GO:0006631	acyl-CoA metabolic process|acyl-CoA hydrolase activity|cytoplasm|cytosol|fatty acid metabolic process
Acot7	10.8567	12.5892	11.0336	19.972	15.0419	18.0829	14.8258	12.4132	11.4149	8.96094	11.0458	9.91716	GeneID:26759,Genbank:NM_013214.4,RGD:628856	acyl-CoA thioesterase 7	GO:1900535,GO:0042802,GO:0005829,GO:0042803,GO:0043005,GO:0006631,GO:0006637,GO:0009062,GO:0015937,GO:0044297,GO:0016290,GO:0047617,GO:0016787,GO:0051792,GO:0036042,GO:0000062,GO:0052689,GO:0036114,GO:0005654,GO:0102991,GO:0036116	palmitic acid biosynthetic process|identical protein binding|cytosol|protein homodimerization activity|neuron projection|fatty acid metabolic process|acyl-CoA metabolic process|fatty acid catabolic process|coenzyme A biosynthetic process|cell body|palmitoyl-CoA hydrolase activity|acyl-CoA hydrolase activity|hydrolase activity|medium-chain fatty acid biosynthetic process|long-chain fatty acyl-CoA …	rno00062,rno01040	Fatty acid elongation|Biosynthesis of unsaturated fatty acids
Acot8	2.74107	3.10671	2.49539	2.51739	2.49171	2.90621	3.49578	2.71596	3.16636	3.17693	3.07208	3.89374	GeneID:170588,Genbank:NM_130756.3,RGD:70368	acyl-CoA thioesterase 8	GO:0052689,GO:0016559,GO:0005777,GO:0052815,GO:0033882,GO:0005782,GO:0043649,GO:0006637,GO:0052816,GO:0045225,GO:0009062,GO:0016290,GO:0005102,GO:0047617,GO:0005739	carboxylic ester hydrolase activity|peroxisome fission|peroxisome|medium-chain acyl-CoA hydrolase activity|choloyl-CoA hydrolase activity|peroxisomal matrix|dicarboxylic acid catabolic process|acyl-CoA metabolic process|long-chain acyl-CoA hydrolase activity|negative regulation of CD4 biosynthetic process|fatty acid catabolic process|palmitoyl-CoA hydrolase activity|signaling receptor binding|acy…	rno00120,rno04146	Primary bile acid biosynthesis|Peroxisome
Acot9	21.5965	20.5438	20.5085	26.5946	25.7949	26.4409	30.53	26.721	24.6774	25.3205	25.307	21.3332	GeneID:302640,Genbank:NM_001013960.1,RGD:1359188	acyl-CoA thioesterase 9	GO:0006637,GO:0047617,GO:0003986,GO:0005739	acyl-CoA metabolic process|acyl-CoA hydrolase activity|acetyl-CoA hydrolase activity|mitochondrion
Acox1	121.009	132.404	147.584	94.4992	94.3773	97.0909	92.2536	95.3447	148.195	170.342	175.381	147.323	GeneID:50681,Genbank:NM_017340.2,RGD:619757	acyl-CoA oxidase 1	GO:0005634,GO:0005654,GO:0005730,GO:0005737,GO:0005739,GO:0006629,GO:0005777,GO:0006635,GO:0006693,GO:0007283,GO:0042803,GO:0016401,GO:0043231,GO:0047485,GO:0050660,GO:0055088,GO:0000038,GO:0071949,GO:0003995,GO:0003997,GO:0005102,GO:0005504,GO:0005778,GO:0005886,GO:0006091,GO:0016559,GO:0019395,GO:0030165,GO:0033539,GO:0033540,GO:0042632	nucleus|nucleoplasm|nucleolus|cytoplasm|mitochondrion|lipid metabolic process|peroxisome|fatty acid beta-oxidation|prostaglandin metabolic process|spermatogenesis|protein homodimerization activity|palmitoyl-CoA oxidase activity|intracellular membrane-bounded organelle|protein N-terminus binding|flavin adenine dinucleotide binding|lipid homeostasis|very long-chain fatty acid metabolic process|FAD …	rno00071,rno00592,rno01040,rno04024,rno04146,rno03320	Fatty acid degradation|alpha-Linolenic acid metabolism|Biosynthesis of unsaturated fatty acids|cAMP signaling pathway|Peroxisome|PPAR signaling pathway
Acox2	0.93677	0.912866	0.61786	0.361942	0.294838	0.373975	0.404505	0.588288	0.562002	0.769852	0.864374	1.01853	GeneID:252898,Genbank:XM_006251745.2,RGD:628684	acyl-CoA oxidase 2	GO:0050660,GO:0016401,GO:0005102,GO:0055088,GO:0033539,GO:0005504,GO:0071949,GO:0033540,GO:0005777,GO:1902884,GO:0005829,GO:0033791,GO:0006631,GO:0006635,GO:0010942,GO:0003995,GO:0043231,GO:0003997	flavin adenine dinucleotide binding|palmitoyl-CoA oxidase activity|signaling receptor binding|lipid homeostasis|fatty acid beta-oxidation using acyl-CoA dehydrogenase|fatty acid binding|FAD binding|fatty acid beta-oxidation using acyl-CoA oxidase|peroxisome|positive regulation of response to oxidative stress|cytosol|3alpha,7alpha,12alpha-trihydroxy-5beta-cholestanoyl-CoA 24-hydroxylase activity|f…	rno00120,rno04146,rno03320	Primary bile acid biosynthesis|Peroxisome|PPAR signaling pathway
Acox3	7.13355	7.35412	6.72811	6.9769	6.19574	6.58197	6.96269	6.08547	8.23589	6.9675	6.77462	7.22945	GeneID:83522,Genbank:XM_017599392.1,RGD:69245	acyl-CoA oxidase 3, pristanoyl	GO:0050660,GO:0005102,GO:0005504,GO:0055088,GO:0005739,GO:0005777,GO:0006635,GO:0071949,GO:0016402,GO:0033539,GO:0003995,GO:0033540,GO:0003997	flavin adenine dinucleotide binding|signaling receptor binding|fatty acid binding|lipid homeostasis|mitochondrion|peroxisome|fatty acid beta-oxidation|FAD binding|pristanoyl-CoA oxidase activity|fatty acid beta-oxidation using acyl-CoA dehydrogenase|acyl-CoA dehydrogenase activity|fatty acid beta-oxidation using acyl-CoA oxidase|acyl-CoA oxidase activity	rno00071,rno00592,rno01040,rno04024,rno04146,rno03320	Fatty acid degradation|alpha-Linolenic acid metabolism|Biosynthesis of unsaturated fatty acids|cAMP signaling pathway|Peroxisome|PPAR signaling pathway
Acoxl	0.0595457	0.0497774	0.0409106	0.0276524	0.00585666	0.025616	0.0459148	0	0.1228	0.0791605	0.091573	0.0558127	GeneID:296138,Genbank:XM_017591581.1,RGD:1306814	acyl-CoA oxidase-like	GO:0006635,GO:0033539,GO:0050660,GO:0055088,GO:0071949,GO:0003995,GO:0003997,GO:0005777	fatty acid beta-oxidation|fatty acid beta-oxidation using acyl-CoA dehydrogenase|flavin adenine dinucleotide binding|lipid homeostasis|FAD binding|acyl-CoA dehydrogenase activity|acyl-CoA oxidase activity|peroxisome
Acp1	8.04598	7.70095	6.89986	7.28748	6.74685	7.66036	10.778	8.53163	7.24501	6.60095	8.41465	7.59662	GeneID:24161,Genbank:NM_001135562.1,RGD:2020	acid phosphatase 1, soluble	GO:0042383,GO:0004725,GO:0004726,GO:0043005,GO:0005737,GO:0005829,GO:0007268,GO:0009898,GO:0016791,GO:0003993,GO:0017124,GO:0035335	sarcolemma|protein tyrosine phosphatase activity|non-membrane spanning protein tyrosine phosphatase activity|neuron projection|cytoplasm|cytosol|chemical synaptic transmission|cytoplasmic side of plasma membrane|phosphatase activity|acid phosphatase activity|SH3 domain binding|peptidyl-tyrosine dephosphorylation	rno00730,rno00740,rno04520	Thiamine metabolism|Riboflavin metabolism|Adherens junction
Acp2	8.46706	8.73831	8.47208	12.1534	9.97003	9.89053	11.1736	9.28114	10.5211	7.201	7.1919	7.21189	GeneID:24162,Genbank:XM_006234500.2,RGD:2021	acid phosphatase 2, lysosomal	GO:0016021,GO:0003993,GO:0016311,GO:0031410,GO:0004721,GO:0005764,GO:0043005,GO:0005765,GO:0043202,GO:0006470,GO:0048102,GO:0007040,GO:0001501,GO:0007268,GO:0010033,GO:0001784	integral component of membrane|acid phosphatase activity|dephosphorylation|cytoplasmic vesicle|phosphoprotein phosphatase activity|lysosome|neuron projection|lysosomal membrane|lysosomal lumen|protein dephosphorylation|autophagic cell death|lysosome organization|skeletal system development|chemical synaptic transmission|response to organic substance|phosphotyrosine residue binding	rno00740,rno04142	Riboflavin metabolism|Lysosome
Acp5	7.67537	7.64776	6.33016	11.336	9.18868	13.5802	25.5926	17.8277	33.0082	8.3314	6.97598	8.83827	GeneID:25732,Genbank:NM_001270889.1,RGD:2022	acid phosphatase 5, tartrate resistant	GO:0007162,GO:0008198,GO:0008199,GO:0032695,GO:0010043,GO:0032720,GO:0014070,GO:0016021,GO:0032929,GO:0033555,GO:0033591,GO:0060349,GO:0034097,GO:0070723,GO:0045019,GO:0001503,GO:0003993,GO:0005615,GO:0005764,GO:0016311,GO:0016787,GO:0030316,GO:0030335,GO:0032496,GO:0032691,GO:0045453,GO:0050728,GO:0050830	negative regulation of cell adhesion|ferrous iron binding|ferric iron binding|negative regulation of interleukin-12 production|response to zinc ion|negative regulation of tumor necrosis factor production|response to organic cyclic compound|integral component of membrane|negative regulation of superoxide anion generation|multicellular organismal response to stress|response to L-ascorbic acid|bone …	rno00740,rno04142,rno04380,rno05323	Riboflavin metabolism|Lysosome|Osteoclast differentiation|Rheumatoid arthritis
Acp6	12.974	11.5149	11.9378	12.4778	8.45681	10.1058	13.7503	11.4847	10.0605	11.6532	12.3374	14.949	GeneID:295305,Genbank:NM_001031645.1,RGD:1306336	acid phosphatase 6, lysophosphatidic	GO:0006644,GO:0016311,GO:0052642,GO:2001311,GO:0002244,GO:0005737,GO:0005739	phospholipid metabolic process|dephosphorylation|lysophosphatidic acid phosphatase activity|lysobisphosphatidic acid metabolic process|hematopoietic progenitor cell differentiation|cytoplasm|mitochondrion
Acp7	0.431878	0.412606	0.58484	0.167424	0.280722	0.348963	0.049642	0.149095	0.112652	0.871426	1.38609	0.510405	GeneID:687403,Genbank:XM_017590440.1,RGD:1585399	acid phosphatase 7, tartrate resistant	GO:0003993,GO:0016311,GO:0046872	acid phosphatase activity|dephosphorylation|metal ion binding
Acpp	1.08098	0.80999	1.27178	1.62213	1.70946	1.45891	3.05392	2.24906	2.16967	1.23981	1.68412	1.57941	GeneID:56780,Genbank:XM_017595870.1,RGD:2023	acid phosphatase, prostate	GO:0006144,GO:0006772,GO:0008253,GO:0009117,GO:0033265,GO:0042131,GO:0012506,GO:0042802,GO:0042803,GO:0045177,GO:0046085,GO:0003993,GO:0005615,GO:0005622,GO:0005771,GO:0005886,GO:0016021,GO:0016311,GO:0016791,GO:0030141,GO:0051289,GO:0030175,GO:0051930,GO:0031985,GO:0052642,GO:0060168	purine nucleobase metabolic process|thiamine metabolic process|5'-nucleotidase activity|nucleotide metabolic process|choline binding|thiamine phosphate phosphatase activity|vesicle membrane|identical protein binding|protein homodimerization activity|apical part of cell|adenosine metabolic process|acid phosphatase activity|extracellular space|intracellular|multivesicular body|plasma membrane|integ…
Acpt	0.43295	0.41363	0.274982	0.308825	0.417883	0.317869	0.345923	0.262515	0.294375	0.318132	0.331429	0.611418	GeneID:308569,Genbank:XM_006229051.3,RGD:1308270	acid phosphatase, testicular	GO:0016021,GO:0042476	integral component of membrane|odontogenesis
Acr	0.174721	0.0589144	0.0376601	0.129822	0.0404349	0.0353711	0.0452857	0.111282	0.161857	0.0695584	0.0421485	0.0674337	GeneID:24163,Genbank:XM_006242178.3,RGD:2024	acrosin	GO:0042806,GO:0007340,GO:0007190,GO:0001669,GO:0043159,GO:0007341,GO:0002077,GO:0048545,GO:0007338,GO:0003674,GO:0004040,GO:0004252,GO:0008144,GO:0008233,GO:0007339,GO:0005537,GO:0008236,GO:0032991,GO:0005798,GO:0006508	fucose binding|acrosome reaction|activation of adenylate cyclase activity|acrosomal vesicle|acrosomal matrix|penetration of zona pellucida|acrosome matrix dispersal|response to steroid hormone|single fertilization|molecular_function|amidase activity|serine-type endopeptidase activity|drug binding|peptidase activity|binding of sperm to zona pellucida|mannose binding|serine-type peptidase activity|…
Acrbp	3.92134	3.93534	3.36835	1.90209	1.83115	2.15446	3.45565	1.86464	3.39445	3.19506	4.35436	4.32991	GeneID:500316,Genbank:NM_001025049.1,RGD:1564880	acrosin binding protein	GO:0002080,GO:0005576,GO:0005634,GO:0031410,GO:0048240,GO:0001669	acrosomal membrane|extracellular region|nucleus|cytoplasmic vesicle|sperm capacitation|acrosomal vesicle
Acrv1	0	0	0.0278921	0.045247	0.0479156	0.125745	0.0804957	0.0439566	0.0456669	0	0.0624328	0	GeneID:60353,Genbank:NM_021747.1,RGD:620153	acrosomal vesicle protein 1	GO:0001669	acrosomal vesicle
Acsbg1	5.40639	4.54096	3.80265	1.29522	5.59642	2.58622	1.56632	4.51004	7.07962	4.34721	3.94874	4.44974	GeneID:171410,Genbank:XM_008766203.2,RGD:708557	acyl-CoA synthetase bubblegum family member 1	GO:0102391,GO:0005777,GO:0001552,GO:0005783,GO:0001676,GO:0005794,GO:0004467,GO:0031410,GO:0031957,GO:0005524,GO:0005737,GO:0000038,GO:0051384	decanoate-CoA ligase activity|peroxisome|ovarian follicle atresia|endoplasmic reticulum|long-chain fatty acid metabolic process|Golgi apparatus|long-chain fatty acid-CoA ligase activity|cytoplasmic vesicle|very long-chain fatty acid-CoA ligase activity|ATP binding|cytoplasm|very long-chain fatty acid metabolic process|response to glucocorticoid	rno00061,rno00071,rno04920,rno03320	Fatty acid biosynthesis|Fatty acid degradation|Adipocytokine signaling pathway|PPAR signaling pathway
Acsbg2	0.179637	0.119388	0.0643924	0.0580323	0.0307275	0.0698864	0.0137655	0.0338264	0.0117142	0.490836	0.168156	0.263544	GeneID:301120,Genbank:XM_006244311.3,RGD:1588580	acyl-CoA synthetase bubblegum family member 2	GO:0005524,GO:0005575,GO:0005737,GO:0005739,GO:0005829,GO:0006631,GO:0007275,GO:0007283,GO:0008150,GO:0016020,GO:0030154,GO:0001676,GO:0047617,GO:0003674,GO:0102391,GO:0004467	ATP binding|cellular_component|cytoplasm|mitochondrion|cytosol|fatty acid metabolic process|multicellular organism development|spermatogenesis|biological_process|membrane|cell differentiation|long-chain fatty acid metabolic process|acyl-CoA hydrolase activity|molecular_function|decanoate-CoA ligase activity|long-chain fatty acid-CoA ligase activity	rno00061,rno00071,rno04920,rno03320	Fatty acid biosynthesis|Fatty acid degradation|Adipocytokine signaling pathway|PPAR signaling pathway
Acsf2	16.9012	16.8881	18.078	16.0039	15.014	17.4274	16.3115	14.8403	17.7199	17.3355	18.6002	22.0789	GeneID:619561,Genbank:NM_001034951.1,RGD:1562656	acyl-CoA synthetase family member 2	GO:0005524,GO:0006631,GO:0016874	ATP binding|fatty acid metabolic process|ligase activity
Acsf3	7.65835	6.86586	6.54313	4.72021	5.62882	5.07494	6.75851	5.36174	6.60709	7.03313	6.68178	6.69489	GeneID:498962,Genbank:XM_574249.7,RGD:1586037	acyl-CoA synthetase family member 3	GO:0016878,GO:0031957,GO:0090409,GO:0090410,GO:0005739,GO:0006631,GO:0006633	acid-thiol ligase activity|very long-chain fatty acid-CoA ligase activity|malonyl-CoA synthetase activity|malonate catabolic process|mitochondrion|fatty acid metabolic process|fatty acid biosynthetic process	rno00280	Valine, leucine and isoleucine degradation
Acsl1	11.7406	10.6423	12.3436	8.84905	7.4475	9.54823	5.89339	10.0564	5.83861	8.91097	7.42693	10.1616	GeneID:25288,Genbank:NM_012820.1,RGD:2015	acyl-CoA synthetase long-chain family member 1	GO:0071902,GO:0010033,GO:0004467,GO:0102391,GO:0014070,GO:0005524,GO:0015908,GO:0005739,GO:0005741,GO:0005778,GO:0005783,GO:0005789,GO:0016021,GO:0005886,GO:0033211,GO:0006629,GO:0034201,GO:0006631,GO:0042178,GO:0006641,GO:0001676,GO:0042493,GO:0007584,GO:0003987,GO:0044539,GO:0008610	positive regulation of protein serine/threonine kinase activity|response to organic substance|long-chain fatty acid-CoA ligase activity|decanoate-CoA ligase activity|response to organic cyclic compound|ATP binding|fatty acid transport|mitochondrion|mitochondrial outer membrane|peroxisomal membrane|endoplasmic reticulum|endoplasmic reticulum membrane|integral component of membrane|plasma membrane|…	rno00061,rno00071,rno04146,rno04216,rno04920,rno03320,rno04714	Fatty acid biosynthesis|Fatty acid degradation|Peroxisome|Ferroptosis|Adipocytokine signaling pathway|PPAR signaling pathway|Thermogenesis
Acsl3	49.5966	57.352	55.5336	45.3141	50.2986	52.0017	57.7036	40.4234	67.9197	71.1366	84.5268	82.2141	GeneID:114024,Genbank:NM_057107.1,RGD:70552	acyl-CoA synthetase long-chain family member 3	GO:0019901,GO:0005524,GO:0019904,GO:0005575,GO:0034379,GO:0005741,GO:0005778,GO:0005783,GO:0005789,GO:0005794,GO:0042998,GO:0005811,GO:0044539,GO:0006633,GO:0048471,GO:0007420,GO:0051047,GO:0007584,GO:0001676,GO:0102391,GO:0014070,GO:0004467,GO:2001247,GO:0016021	protein kinase binding|ATP binding|protein domain specific binding|cellular_component|very-low-density lipoprotein particle assembly|mitochondrial outer membrane|peroxisomal membrane|endoplasmic reticulum|endoplasmic reticulum membrane|Golgi apparatus|positive regulation of Golgi to plasma membrane protein transport|lipid droplet|long-chain fatty acid import|fatty acid biosynthetic process|perinu…	rno00061,rno00071,rno04146,rno04216,rno04920,rno03320,rno04714	Fatty acid biosynthesis|Fatty acid degradation|Peroxisome|Ferroptosis|Adipocytokine signaling pathway|PPAR signaling pathway|Thermogenesis
Acsl4	12.9454	16.2968	13.7981	23.4773	18.8423	19.783	42.3413	23.8434	16.9557	14.4726	14.6952	13.1457	GeneID:113976,Genbank:XM_006257316.2,RGD:69401	acyl-CoA synthetase long-chain family member 4	GO:0070672,GO:0030307,GO:0005524,GO:0102391,GO:0031957,GO:0005737,GO:0031966,GO:0005739,GO:0005777,GO:0005783,GO:0005811,GO:0006629,GO:0032307,GO:0006631,GO:0043025,GO:0006641,GO:0044233,GO:0007584,GO:0047676,GO:0008610,GO:0001676,GO:0060136,GO:0015908,GO:0004467,GO:0060996,GO:0030182	response to interleukin-15|positive regulation of cell growth|ATP binding|decanoate-CoA ligase activity|very long-chain fatty acid-CoA ligase activity|cytoplasm|mitochondrial membrane|mitochondrion|peroxisome|endoplasmic reticulum|lipid droplet|lipid metabolic process|negative regulation of prostaglandin secretion|fatty acid metabolic process|neuronal cell body|triglyceride metabolic process|ER-m…	rno00061,rno00071,rno04146,rno04216,rno04920,rno03320,rno04714	Fatty acid biosynthesis|Fatty acid degradation|Peroxisome|Ferroptosis|Adipocytokine signaling pathway|PPAR signaling pathway|Thermogenesis
Acsl5	37.7999	42.9357	39.4573	48.0824	43.3517	45.0802	69.4062	50.0089	51.9327	43.4227	48.5729	45.058	GeneID:94340,Genbank:NM_053607.1,RGD:69402	acyl-CoA synthetase long-chain family member 5	GO:0032869,GO:0007584,GO:0004467,GO:0070723,GO:0008654,GO:0005524,GO:0102391,GO:0009744,GO:0005634,GO:2001236,GO:0005730,GO:0005739,GO:0009749,GO:0005741,GO:0010747,GO:0005743,GO:0010867,GO:0005783,GO:0015908,GO:0001676,GO:0016021,GO:0005789,GO:0003824,GO:0032000,GO:0006631	cellular response to insulin stimulus|response to nutrient|long-chain fatty acid-CoA ligase activity|response to cholesterol|phospholipid biosynthetic process|ATP binding|decanoate-CoA ligase activity|response to sucrose|nucleus|regulation of extrinsic apoptotic signaling pathway|nucleolus|mitochondrion|response to glucose|mitochondrial outer membrane|positive regulation of plasma membrane long-c…	rno00061,rno00071,rno04146,rno04216,rno04920,rno03320,rno04714	Fatty acid biosynthesis|Fatty acid degradation|Peroxisome|Ferroptosis|Adipocytokine signaling pathway|PPAR signaling pathway|Thermogenesis
Acsl6	0.415061	0.505115	0.176532	0.00734287	0.0349917	0.0204064	0.0348351	0.0428008	0.0815212	0.0382189	0.0253296	0.0463144	GeneID:117243,Genbank:XM_006246224.3,RGD:69403	acyl-CoA synthetase long-chain family member 6	GO:0016021,GO:0007405,GO:0001676,GO:0019899,GO:0007584,GO:0004467,GO:0032869,GO:0008654,GO:0042803,GO:0005524,GO:0005634,GO:0009629,GO:0005739,GO:0010747,GO:0005741,GO:0048545,GO:0010867,GO:0005778,GO:0048666,GO:0010976,GO:0005789,GO:0001666,GO:0102391,GO:0015908,GO:0006641,GO:0016020	integral component of membrane|neuroblast proliferation|long-chain fatty acid metabolic process|enzyme binding|response to nutrient|long-chain fatty acid-CoA ligase activity|cellular response to insulin stimulus|phospholipid biosynthetic process|protein homodimerization activity|ATP binding|nucleus|response to gravity|mitochondrion|positive regulation of plasma membrane long-chain fatty acid tran…	rno00061,rno00071,rno04146,rno04216,rno04920,rno03320,rno04714	Fatty acid biosynthesis|Fatty acid degradation|Peroxisome|Ferroptosis|Adipocytokine signaling pathway|PPAR signaling pathway|Thermogenesis
Acsm1	0.0328869	0.0104731	0.0100421	0.0162905	0.00862564	0.00754541	0.0289812	0.0791296	0.0246625	0	0	0.0205501	GeneID:361638,Genbank:XM_006230127.3,RGD:1306813	acyl-CoA synthetase medium-chain family member 1	GO:0005759,GO:0006633,GO:0006637,GO:0015645,GO:0047760,GO:0003996,GO:0004321	mitochondrial matrix|fatty acid biosynthetic process|acyl-CoA metabolic process|fatty acid ligase activity|butyrate-CoA ligase activity|acyl-CoA ligase activity|fatty-acyl-CoA synthase activity	rno00650	Butanoate metabolism
Acsm2a	0.0103794	0.0099162	0.114098	0	0.016334	0	0	0	0.0700533	0	0.0212827	0.00972869	GeneID:246263,Genbank:NM_144748.1,RGD:708383	acyl-CoA synthetase medium-chain family member 2A	GO:0005524,GO:0005575,GO:0005759,GO:0006633,GO:0006637,GO:0008150,GO:0015645,GO:0036112,GO:0046872,GO:0047760,GO:0003674,GO:0003996,GO:0004321	ATP binding|cellular_component|mitochondrial matrix|fatty acid biosynthetic process|acyl-CoA metabolic process|biological_process|fatty acid ligase activity|medium-chain fatty-acyl-CoA metabolic process|metal ion binding|butyrate-CoA ligase activity|molecular_function|acyl-CoA ligase activity|fatty-acyl-CoA synthase activity
Acsm3	1.14544	1.32422	1.03166	1.11571	0.992169	1.04017	0.9161	0.965778	1.12607	1.21913	1.60856	1.39843	GeneID:24763,Genbank:XM_006230106.3,RGD:62086	acyl-CoA synthetase medium-chain family member 3	GO:0005524,GO:0005575,GO:0005759,GO:0006633,GO:0006637,GO:0008150,GO:0015645,GO:0046872,GO:0003674,GO:0047760,GO:0003996,GO:0004321	ATP binding|cellular_component|mitochondrial matrix|fatty acid biosynthetic process|acyl-CoA metabolic process|biological_process|fatty acid ligase activity|metal ion binding|molecular_function|butyrate-CoA ligase activity|acyl-CoA ligase activity|fatty-acyl-CoA synthase activity	rno00650	Butanoate metabolism
Acsm4	0.182012	0.335787	0.235727	0.130576	0.108646	0.0863999	0.18252	0.113261	0.258868	0.273067	0.431124	0.358851	GeneID:353317,Genbank:NM_181695.1,RGD:727928	acyl-CoA synthetase medium-chain family member 4	GO:0005524,GO:0005549,GO:0005739,GO:0005759,GO:0006633,GO:0006637,GO:0007608,GO:0015645,GO:0046872,GO:0047760,GO:0003996,GO:0004321	ATP binding|odorant binding|mitochondrion|mitochondrial matrix|fatty acid biosynthetic process|acyl-CoA metabolic process|sensory perception of smell|fatty acid ligase activity|metal ion binding|butyrate-CoA ligase activity|acyl-CoA ligase activity|fatty-acyl-CoA synthase activity	rno00650	Butanoate metabolism
Acsm5	0.616548	0.0200807	0.603305	0.0104116	0.0385898	0.0192897	0.0679159	0.0252867	0.0525411	0.182896	0.689575	0.177309	GeneID:361637,Genbank:XM_017589392.1,RGD:1309578	acyl-CoA synthetase medium-chain family member 5	GO:0004321,GO:0005524,GO:0005525,GO:0005575,GO:0005759,GO:0006633,GO:0006637,GO:0008150,GO:0015645,GO:0046872,GO:0047760,GO:0003674,GO:0003824,GO:0003996	fatty-acyl-CoA synthase activity|ATP binding|GTP binding|cellular_component|mitochondrial matrix|fatty acid biosynthetic process|acyl-CoA metabolic process|biological_process|fatty acid ligase activity|metal ion binding|butyrate-CoA ligase activity|molecular_function|catalytic activity|acyl-CoA ligase activity	rno00650	Butanoate metabolism
Acss1	18.4636	13.9037	17.8971	7.29242	7.09104	7.5189	16.8024	10.4348	17.0011	16.4181	14.999	21.3307	GeneID:296259,Genbank:NM_001106524.1,RGD:1306246	acyl-CoA synthetase short-chain family member 1	GO:0005739,GO:0005759,GO:0006085,GO:0016208,GO:0019413,GO:0019427,GO:0019542,GO:0003987,GO:0005524	mitochondrion|mitochondrial matrix|acetyl-CoA biosynthetic process|AMP binding|acetate biosynthetic process|acetyl-CoA biosynthetic process from acetate|propionate biosynthetic process|acetate-CoA ligase activity|ATP binding	rno00010,rno00620,rno00640	Glycolysis / Gluconeogenesis|Pyruvate metabolism|Propanoate metabolism
Acss2	9.18616	10.6873	9.524	8.4777	9.55865	9.05296	13.4895	10.4731	10.9771	8.01001	7.14714	7.56417	GeneID:311569,Genbank:XM_006235321.3,RGD:1305489	acyl-CoA synthetase short-chain family member 2	GO:0005654,GO:0005737,GO:0005829,GO:0006085,GO:0008610,GO:0016021,GO:0016208,GO:0019413,GO:0019427,GO:0003987,GO:0019542,GO:0043231	nucleoplasm|cytoplasm|cytosol|acetyl-CoA biosynthetic process|lipid biosynthetic process|integral component of membrane|AMP binding|acetate biosynthetic process|acetyl-CoA biosynthetic process from acetate|acetate-CoA ligase activity|propionate biosynthetic process|intracellular membrane-bounded organelle	rno00010,rno00620,rno00640	Glycolysis / Gluconeogenesis|Pyruvate metabolism|Propanoate metabolism
Acss3	2.01181	1.86284	1.69604	0.86927	1.05819	1.25931	2.06194	0.889204	2.08265	1.04655	0.848201	0.84036	GeneID:314800,Genbank:XM_006241302.3,RGD:1307051	acyl-CoA synthetase short-chain family member 3	GO:0003824	catalytic activity	rno00640	Propanoate metabolism
Acta1	18.859	26.1479	23.4678	890.034	492.806	1323.59	168.169	1070.58	509.94	113.939	95.9391	104.797	GeneID:29437,Genbank:NM_019212.2,RGD:2025	actin, alpha 1, skeletal muscle	GO:0090131,GO:0030175,GO:0005575,GO:0030240,GO:0005737,GO:0005865,GO:0005884,GO:0009612,GO:0043503,GO:0009991,GO:0044297,GO:0010226,GO:0048545,GO:0010628,GO:0048741,GO:0015629,GO:0001725,GO:0030017,GO:0071417,GO:0030027,GO:0005524	mesenchyme migration|filopodium|cellular_component|skeletal muscle thin filament assembly|cytoplasm|striated muscle thin filament|actin filament|response to mechanical stimulus|skeletal muscle fiber adaptation|response to extracellular stimulus|cell body|response to lithium ion|response to steroid hormone|positive regulation of gene expression|skeletal muscle fiber development|actin cytoskeleton|…
Acta2	3037.26	2975.01	3061.47	3722.22	5089.12	4187.64	913.416	4173.46	2277.12	3848.29	3180.56	3061.91	GeneID:81633,Genbank:NM_031004.2,RGD:621676	actin, alpha 2, smooth muscle, aorta	GO:0030485,GO:0005737,GO:0044297,GO:0061041,GO:0005856,GO:0006936,GO:0008217,GO:0009615,GO:0010628,GO:0061870,GO:0014829,GO:0061874,GO:0015629,GO:0070374,GO:0072144,GO:0019901,GO:0001725,GO:0090131,GO:0030027,GO:0005524,GO:2000491,GO:0030175	smooth muscle contractile fiber|cytoplasm|cell body|regulation of wound healing|cytoskeleton|muscle contraction|regulation of blood pressure|response to virus|positive regulation of gene expression|positive regulation of hepatic stellate cell migration|vascular smooth muscle contraction|positive regulation of hepatic stellate cell contraction|actin cytoskeleton|positive regulation of ERK1 and ERK…	rno04371,rno04926,rno04270	Apelin signaling pathway|Relaxin signaling pathway|Vascular smooth muscle contraction
Actb	4405.85	4485.87	4545.12	4259.4	4248.5	4103.91	3662.49	4288.81	3622.51	4167.52	3698.1	4113.27	GeneID:81822,Genbank:NM_031144.3,RGD:628837	actin, beta	GO:0005856,GO:0005886,GO:0005925,GO:0007409,GO:0007623,GO:0009612,GO:0032091,GO:0014069,GO:0015629,GO:0032991,GO:0035267,GO:0035902,GO:0072749,GO:0036464,GO:0097433,GO:0042802,GO:0098973,GO:0098974,GO:0001725,GO:0002102,GO:0005515,GO:0005524,GO:0005634,GO:0005829,GO:0019894,GO:0019901,GO:0030424,GO:0030863,GO:0043209,GO:0030957,GO:0045121,GO:0048870,GO:0050998,GO:0060041,GO:0071257	cytoskeleton|plasma membrane|focal adhesion|axonogenesis|circadian rhythm|response to mechanical stimulus|negative regulation of protein binding|postsynaptic density|actin cytoskeleton|protein-containing complex|NuA4 histone acetyltransferase complex|response to immobilization stress|cellular response to cytochalasin B|cytoplasmic ribonucleoprotein granule|dense body|identical protein binding|str…	rno04015,rno04390,rno04145,rno04210,rno04510,rno04520,rno04530,rno04810,rno04611,rno04670,rno04921,rno04919,rno04971,rno04714,rno05205,rno05225,rno05418,rno05410,rno05412,rno05414,rno05416,rno05132,rno05100,rno05164	Rap1 signaling pathway|Hippo signaling pathway|Phagosome|Apoptosis|Focal adhesion|Adherens junction|Tight junction|Regulation of actin cytoskeleton|Platelet activation|Leukocyte transendothelial migration|Oxytocin signaling pathway|Thyroid hormone signaling pathway|Gastric acid secretion|Thermogenesis|Proteoglycans in cancer|Hepatocellular carcinoma|Fluid shear stress and atherosclerosis|Hypertro…
Actbl2	0	0.00875426	0.00839403	0	0	0	0.00807495	0.00661429	0.00687164	0.0177187	0.0187889	0	GeneID:294732,Genbank:NM_001106409.1,RGD:1309504	actin, beta-like 2	GO:0005524	ATP binding
Actc1	32.5366	36.077	61.9504	44.8202	87.7152	69.0246	5.97594	42.7608	65.5271	72.3169	90.1045	54.6693	GeneID:29275,Genbank:NM_019183.1,RGD:2026	actin, alpha, cardiac muscle 1	GO:0070252,GO:0042493,GO:0005737,GO:0090131,GO:0042643,GO:0005884,GO:0043066,GO:0010628,GO:0016887,GO:0017022,GO:0030017,GO:0030027,GO:0044297,GO:0030048,GO:0045471,GO:0030175,GO:0055003,GO:0030240,GO:0055008,GO:0031032,GO:0005515,GO:0060047,GO:0031674,GO:0005524,GO:0060048,GO:0033275	actin-mediated cell contraction|response to drug|cytoplasm|mesenchyme migration|actomyosin, actin portion|actin filament|negative regulation of apoptotic process|positive regulation of gene expression|ATPase activity|myosin binding|sarcomere|lamellipodium|cell body|actin filament-based movement|response to ethanol|filopodium|cardiac myofibril assembly|skeletal muscle thin filament assembly|cardia…	rno04260,rno04261,rno05410,rno05414	Cardiac muscle contraction|Adrenergic signaling in cardiomyocytes|Hypertrophic cardiomyopathy (HCM)|Dilated cardiomyopathy (DCM)
Actg1	225.03	252.05	191.984	358.142	332.229	325.679	458.383	345.079	313.348	193.683	191.779	221.275	GeneID:287876,Genbank:XM_017597166.1,RGD:1304556	actin, gamma 1	GO:0045214,GO:0005524,GO:0045335,GO:0005829,GO:0051592,GO:0005856,GO:0005884,GO:0005886,GO:0005925,GO:0009612,GO:0070062,GO:0015629,GO:0071346,GO:0030016,GO:0097433,GO:0031625,GO:0031941,GO:0003674,GO:0042802,GO:0005200,GO:0043209,GO:0005522	sarcomere organization|ATP binding|phagocytic vesicle|cytosol|response to calcium ion|cytoskeleton|actin filament|plasma membrane|focal adhesion|response to mechanical stimulus|extracellular exosome|actin cytoskeleton|cellular response to interferon-gamma|myofibril|dense body|ubiquitin protein ligase binding|filamentous actin|molecular_function|identical protein binding|structural constituent of …	rno04015,rno04390,rno04145,rno04210,rno04510,rno04520,rno04530,rno04810,rno04611,rno04670,rno04921,rno04919,rno04714,rno05205,rno05225,rno05418,rno05410,rno05412,rno05414,rno05416,rno05132,rno05100,rno05164	Rap1 signaling pathway|Hippo signaling pathway|Phagosome|Apoptosis|Focal adhesion|Adherens junction|Tight junction|Regulation of actin cytoskeleton|Platelet activation|Leukocyte transendothelial migration|Oxytocin signaling pathway|Thyroid hormone signaling pathway|Thermogenesis|Proteoglycans in cancer|Hepatocellular carcinoma|Fluid shear stress and atherosclerosis|Hypertrophic cardiomyopathy (HC…
Actg2	2430.97	2155.86	2529.19	5087.86	7410.39	6518.14	1122.11	6857.78	3571.47	4307.44	3263.75	4141.35	GeneID:25365,Genbank:XM_006236728.2,RGD:2027	actin, gamma 2, smooth muscle, enteric	GO:0005737,GO:0008150,GO:0010628,GO:0030027,GO:0030175,GO:0032982,GO:0044297,GO:0071944,GO:0090131,GO:0003674,GO:0005524,GO:0005575	cytoplasm|biological_process|positive regulation of gene expression|lamellipodium|filopodium|myosin filament|cell body|cell periphery|mesenchyme migration|molecular_function|ATP binding|cellular_component	rno04270	Vascular smooth muscle contraction
Actl10	0.614817	0.647847	0.3313	0.47026	0.618937	0.553871	0.573673	0.587378	0.318676	0.297216	0.287359	0.228815	GeneID:100911682,Genbank:XM_003749597.4,RGD:6491130	actin-like 10
Actl11	0.00682395	0	0.00625116	0.0152111	0	0.00469697	0	0.00492576	0.00511742	0	0	0	GeneID:316000,Genbank:NM_001024788.1,RGD:1310036	actin-like 11
Actl6a	17.32	19.0589	15.9158	18.2666	16.646	17.3411	21.3659	16.1119	18.1109	17.3746	18.2157	17.8728	GeneID:361925,Genbank:NM_001039033.1,RGD:1307747	actin-like 6A	GO:0071564,GO:0005575,GO:0005634,GO:0005654,GO:0005886,GO:0006338,GO:0007399,GO:0016514,GO:0021510,GO:0031011,GO:0035267,GO:0003407,GO:0043967,GO:0003674,GO:0043968,GO:0003682	npBAF complex|cellular_component|nucleus|nucleoplasm|plasma membrane|chromatin remodeling|nervous system development|SWI/SNF complex|spinal cord development|Ino80 complex|NuA4 histone acetyltransferase complex|neural retina development|histone H4 acetylation|molecular_function|histone H2A acetylation|chromatin binding	rno04714,rno05225	Thermogenesis|Hepatocellular carcinoma
Actl6b	0.0458659	0.0292128	0.0980373	0.0113598	0.0360894	0.0210465	0	0.0220717	0.0573263	0.0147817	0	0.0143302	GeneID:288563,Genbank:XM_006249120.2,RGD:1307763	actin-like 6B	GO:0005634,GO:0005730,GO:0006338,GO:0006351,GO:0006355,GO:0007399,GO:0016514,GO:0021510,GO:0071565,GO:0003674,GO:0005575	nucleus|nucleolus|chromatin remodeling|transcription, DNA-templated|regulation of transcription, DNA-templated|nervous system development|SWI/SNF complex|spinal cord development|nBAF complex|molecular_function|cellular_component	rno04714,rno05225	Thermogenesis|Hepatocellular carcinoma
Actl7a	1.03498	0.395516	0.479629	0.542832	0.632333	0.553143	0.708191	0.492195	0.483952	0.400264	0.536792	0.776075	GeneID:298017,Genbank:XM_008763707.2,RGD:1304697	actin-like 7a	GO:0005737,GO:0005794,GO:0005856,GO:0031514,GO:0032991,GO:0001673,GO:0005515	cytoplasm|Golgi apparatus|cytoskeleton|motile cilium|protein-containing complex|male germ cell nucleus|protein binding
Actl7b	0.0725137	0.242472	0.0498203	0.161638	0.0713214	0.0748675	0.31951	0.0916001	0.149544	0.0701093	0.09293	0.203903	GeneID:313183,Genbank:NM_001025417.1,RGD:1305655	actin-like 7b	GO:0005737,GO:0005856	cytoplasm|cytoskeleton
Actl9	0	0	0	0	0	0.0125775	0	0	0	0	0.0187344	0.0171276	GeneID:314659,Genbank:NM_001108077.1,RGD:1306886	actin-like 9
Actl9b	0	0	0	0	0	0	0	0	0	0	0	0	GeneID:292516,Genbank:NM_001013893.1,RGD:1359476	actin-like 9b	GO:0005737,GO:0005856	cytoplasm|cytoskeleton
Actn1	183.144	167.547	180.167	360.901	393.002	447.334	107.948	328.535	160.803	196.981	196.226	188.983	GeneID:81634,Genbank:NM_031005.3,RGD:70907	actinin, alpha 1	GO:0005178,GO:0005509,GO:0005515,GO:0005622,GO:0005634,GO:0005737,GO:0007015,GO:0005829,GO:0016328,GO:0005884,GO:0017166,GO:0019904,GO:0030017,GO:0030018,GO:0042803,GO:0042995,GO:0030027,GO:0043197,GO:0030168,GO:0044325,GO:0045214,GO:0048041,GO:0001725,GO:0090636,GO:0090637,GO:0048741,GO:0097433,GO:0051015,GO:1903506,GO:0001726,GO:1990357,GO:0003725,GO:0005886,GO:0005903,GO:0005911,GO:0005915,GO:…	integrin binding|calcium ion binding|protein binding|intracellular|nucleus|cytoplasm|actin filament organization|cytosol|lateral plasma membrane|actin filament|vinculin binding|protein domain specific binding|sarcomere|Z disc|protein homodimerization activity|cell projection|lamellipodium|dendritic spine|platelet activation|ion channel binding|sarcomere organization|focal adhesion assembly|stress…	rno04510,rno04520,rno04530,rno04810,rno04670,rno05203,rno05322,rno05146	Focal adhesion|Adherens junction|Tight junction|Regulation of actin cytoskeleton|Leukocyte transendothelial migration|Viral carcinogenesis|Systemic lupus erythematosus|Amoebiasis
Actn2	0.111228	0.0572195	0.203784	0.629376	1.29933	1.54885	0.173418	0.870821	0.45556	0.0744509	0.105264	0.208511	GeneID:291245,Genbank:NM_001170325.1,RGD:1308097	actinin alpha 2	GO:0030018,GO:0030035,GO:0030175,GO:0030274,GO:0030374,GO:0030375,GO:0030864,GO:0051695,GO:0031432,GO:0055013,GO:0042391,GO:0070080,GO:0042802,GO:0072659,GO:0086097,GO:1901017,GO:1901018,GO:1903506,GO:2000009,GO:2001137,GO:0005509,GO:0005515,GO:0005546,GO:0005886,GO:0005925,GO:0006936,GO:0008092,GO:0019904,GO:0030017,GO:0042803,GO:0043267,GO:0043268,GO:0044325,GO:0045214,GO:0046983,GO:0048041,GO:…	Z disc|microspike assembly|filopodium|LIM domain binding|ligand-dependent nuclear receptor transcription coactivator activity|thyroid hormone receptor coactivator activity|cortical actin cytoskeleton|actin filament uncapping|titin binding|cardiac muscle cell development|regulation of membrane potential|titin Z domain binding|identical protein binding|protein localization to plasma membrane|phosph…	rno05412	Arrhythmogenic right ventricular cardiomyopathy (ARVC)
Actn3	0.614584	0.436175	0.369969	0.123948	0.131258	0.138993	0.224376	0.0950631	0.362127	0.263148	0.279043	0.38678	GeneID:171009,Genbank:NM_133424.2,RGD:621792	actinin alpha 3	GO:1903715,GO:0048633,GO:0005903,GO:1904025,GO:0048743,GO:0005925,GO:0051015,GO:0006936,GO:0014728,GO:0014732,GO:0014883,GO:0014894,GO:0060349,GO:0030017,GO:0070885,GO:0030018,GO:0090257,GO:0031448,GO:0090324,GO:0044325,GO:0001649,GO:1900159,GO:0045820,GO:0005509,GO:1901078,GO:0048041,GO:0005622	regulation of aerobic respiration|positive regulation of skeletal muscle tissue growth|brush border|positive regulation of glucose catabolic process to lactate via pyruvate|positive regulation of skeletal muscle fiber development|focal adhesion|actin filament binding|muscle contraction|regulation of the force of skeletal muscle contraction|skeletal muscle atrophy|transition between fast and slow …	rno05412	Arrhythmogenic right ventricular cardiomyopathy (ARVC)
Actn4	79.3201	90.32	80.2502	125.919	121.162	116.08	152.124	142.99	124.741	92.1945	101.382	93.0777	GeneID:63836,Genbank:XM_008759185.1,RGD:61816	actinin alpha 4	GO:0005622,GO:0005634,GO:0005737,GO:0005829,GO:0031490,GO:0005903,GO:0032991,GO:0005911,GO:0015031,GO:0035257,GO:0035357,GO:0042803,GO:0051272,GO:0042974,GO:0070830,GO:0042981,GO:1900025,GO:0043005,GO:1901224,GO:1902396,GO:1903506,GO:0000977,GO:0001666,GO:0001725,GO:0001882,GO:0003779,GO:0005509,GO:0005515,GO:0015629,GO:0016604,GO:0030018,GO:0030050,GO:0030335,GO:0030374,GO:0044325,GO:0044877,GO:…	intracellular|nucleus|cytoplasm|cytosol|chromatin DNA binding|brush border|protein-containing complex|cell-cell junction|protein transport|nuclear hormone receptor binding|peroxisome proliferator activated receptor signaling pathway|protein homodimerization activity|positive regulation of cellular component movement|retinoic acid receptor binding|bicellular tight junction assembly|regulation of a…	rno04510,rno04520,rno04530,rno04810,rno04670,rno05203,rno05322,rno05146	Focal adhesion|Adherens junction|Tight junction|Regulation of actin cytoskeleton|Leukocyte transendothelial migration|Viral carcinogenesis|Systemic lupus erythematosus|Amoebiasis
Actr10	37.283	36.3513	34.2652	36.1383	32.3641	35.6225	39.7762	34.894	35.8207	36.9728	34.9033	36.2025	GeneID:299121,Genbank:NM_001009602.1,RGD:1306515	actin-related protein 10 homolog	GO:0007018,GO:0008150,GO:0003674,GO:0005575,GO:0005869	microtubule-based movement|biological_process|molecular_function|cellular_component|dynactin complex
Actr1a	43.2971	44.566	41.7116	52.3241	53.1814	55.0921	47.713	52.2967	47.0981	45.0758	44.2129	45.7386	GeneID:294010,Genbank:XM_006231470.3,RGD:1307025	ARP1 actin-related protein 1 homolog A, centractin alpha	GO:0005737,GO:0005813,GO:0005814,GO:0005869,GO:0007283,GO:0015630,GO:0030137,GO:0043209,GO:0099738,GO:0002177,GO:0003674,GO:0005524	cytoplasm|centrosome|centriole|dynactin complex|spermatogenesis|microtubule cytoskeleton|COPI-coated vesicle|myelin sheath|cell cortex region|manchette|molecular_function|ATP binding
Actr1b	35.7489	34.4035	33.8884	34.6505	38.8963	37.0266	27.5209	34.2575	31.7317	38.8025	37.9355	39.0515	GeneID:316333,Genbank:NM_001039028.2,RGD:1307380	ARP1 actin-related protein 1 homolog B, centractin beta	GO:0005813,GO:0005869,GO:0015630,GO:0005524,GO:0005737	centrosome|dynactin complex|microtubule cytoskeleton|ATP binding|cytoplasm
Actr2	76.9635	82.2986	79.7686	124.02	94.4593	113.11	157.86	111.956	109.576	81.5293	82.0926	82.1249	GeneID:289820,Genbank:XM_017599128.1,RGD:1310826	ARP2 actin-related protein 2 homolog (yeast)	GO:0060271,GO:0030478,GO:0005737,GO:0061003,GO:0033206,GO:0005829,GO:0061825,GO:0034314,GO:0005885,GO:0071346,GO:0005938,GO:0007163,GO:0008092,GO:0008306,GO:0035902,GO:0008356,GO:0071437,GO:0035984,GO:0014069,GO:0045471,GO:0016344,GO:0051015,GO:0016482,GO:0005200,GO:0051321,GO:0030027,GO:0005515,GO:0051653,GO:0030036,GO:0005524	cilium assembly|actin cap|cytoplasm|positive regulation of dendritic spine morphogenesis|meiotic cytokinesis|cytosol|podosome core|Arp2/3 complex-mediated actin nucleation|Arp2/3 protein complex|cellular response to interferon-gamma|cell cortex|establishment or maintenance of cell polarity|cytoskeletal protein binding|associative learning|response to immobilization stress|asymmetric cell division…	rno04530	Tight junction
Actr3	119.215	122.171	119.804	168.109	146.2	159.245	203.203	156.819	155.674	129.823	130.377	129.2	GeneID:81732,Genbank:NM_031068.1,RGD:71024	ARP3 actin-related protein 3 homolog (yeast)	GO:0005884,GO:0005885,GO:0005903,GO:0005911,GO:0030056,GO:0030517,GO:0007163,GO:0030838,GO:0031252,GO:0032092,GO:0032355,GO:0033206,GO:0051321,GO:0051491,GO:0034314,GO:0051653,GO:0051965,GO:0060076,GO:0060271,GO:0000139,GO:0071356,GO:0001726,GO:0071364,GO:0002102,GO:0071503,GO:0061003,GO:0003779,GO:0071560,GO:0005200,GO:0090314,GO:1903078,GO:0005515,GO:1904171,GO:0005524,GO:1905835,GO:0005737,GO:…	actin filament|Arp2/3 protein complex|brush border|cell-cell junction|hemidesmosome|negative regulation of axon extension|establishment or maintenance of cell polarity|positive regulation of actin filament polymerization|cell leading edge|positive regulation of protein binding|response to estradiol|meiotic cytokinesis|meiotic cell cycle|positive regulation of filopodium assembly|Arp2/3 complex-me…	rno04530	Tight junction
Actr3b	2.56615	2.29841	2.28779	1.08955	0.685075	0.646592	0.262484	0.446546	1.15121	0.553809	0.939616	1.03083	GeneID:362298,Genbank:NM_001191860.1,RGD:1565759	ARP3 actin-related protein 3 homolog B (yeast)	GO:0005524,GO:0005885,GO:0034314	ATP binding|Arp2/3 protein complex|Arp2/3 complex-mediated actin nucleation	rno04530	Tight junction
Actr5	3.81664	3.81738	3.72073	2.90587	2.63235	2.91242	4.01944	3.44203	3.74556	3.19807	3.75839	3.97486	GeneID:362258,Genbank:XM_006235422.2,RGD:1307958	ARP5 actin-related protein 5 homolog	GO:0005737,GO:0006302,GO:0008150,GO:0031011,GO:0070914,GO:0003674,GO:0005575,GO:0005634	cytoplasm|double-strand break repair|biological_process|Ino80 complex|UV-damage excision repair|molecular_function|cellular_component|nucleus
Actr6	9.64792	8.98204	8.97599	7.7889	7.6668	7.67686	7.48912	8.16935	8.67194	9.02369	9.16186	9.45355	GeneID:314718,Genbank:NM_001108081.1,RGD:1304609	ARP6 actin-related protein 6 homolog	GO:0006338,GO:0008150,GO:0003674,GO:0005575,GO:0005634	chromatin remodeling|biological_process|molecular_function|cellular_component|nucleus
Actr8	18.6622	16.9552	17.2199	13.1278	12.2754	14.9447	15.8486	12.4354	16.7569	18.7642	19.1564	20.4041	GeneID:361107,Genbank:XM_006252682.3,RGD:1311878	ARP8 actin-related protein 8 homolog	GO:0005634,GO:0005813,GO:0006281,GO:0006310,GO:0006338,GO:0006351,GO:0006355,GO:0008150,GO:0031011,GO:0003674,GO:0005524,GO:0005575	nucleus|centrosome|DNA repair|DNA recombination|chromatin remodeling|transcription, DNA-templated|regulation of transcription, DNA-templated|biological_process|Ino80 complex|molecular_function|ATP binding|cellular_component
Actrt1	0	0	0	0	0	0	0	0	0	0	0	0	GeneID:302796,Genbank:NM_001013961.1,RGD:1359559	actin-related protein T1	GO:0005737,GO:0005856	cytoplasm|cytoskeleton
Actrt2	0	0	0	0	0	0	0	0	0	0	0	0	GeneID:298671,Genbank:NM_001013937.1,RGD:1359657	actin-related protein T2
Actrt3	0	0.0862248	0.0620075	0.201179	0.124276	0.155303	1.17313	0.374596	0.69374	0.152704	0.254458	0.190337	GeneID:365763,Genbank:NM_001108942.1,RGD:1561457	actin-related protein T3	GO:0001673	male germ cell nucleus
Acvr1	5.04217	5.15293	4.68977	5.9313	5.6543	5.80738	5.57485	5.33257	5.47855	4.4491	4.66979	4.36591	GeneID:79558,Genbank:XM_006234214.3,RGD:620200	activin A receptor type 1	GO:1905007,GO:2000017,GO:2001237,GO:0001707,GO:0001755,GO:0002526,GO:0003143,GO:0004702,GO:0003148,GO:0005025,GO:0003181,GO:0005524,GO:0005887,GO:0009968,GO:0006468,GO:0010862,GO:0016361,GO:0000082,GO:0032926,GO:0018107,GO:0001569,GO:0042803,GO:0001655,GO:0045177,GO:0001701,GO:0045669,GO:0001702,GO:0048641,GO:0050431,GO:0045893,GO:0045944,GO:0051145,GO:0060037,GO:0060389,GO:0060412,GO:0060923,GO:…	positive regulation of epithelial to mesenchymal transition involved in endocardial cushion formation|positive regulation of determination of dorsal identity|negative regulation of extrinsic apoptotic signaling pathway|mesoderm formation|neural crest cell migration|acute inflammatory response|embryonic heart tube morphogenesis|signal transducer, downstream of receptor, with serine/threonine kinas…	rno04350,rno04060,rno04550,rno05418	TGF-beta signaling pathway|Cytokine-cytokine receptor interaction|Signaling pathways regulating pluripotency of stem cells|Fluid shear stress and atherosclerosis
Acvr1b	7.25896	7.35614	6.84388	7.26744	6.07607	7.16238	11.2843	7.66432	9.1341	7.50377	8.0657	8.89579	GeneID:29381,Genbank:NM_199230.1,RGD:735207	activin A receptor type 1B	GO:0005887,GO:0006355,GO:0006468,GO:0007165,GO:0007417,GO:0032924,GO:0009966,GO:0032927,GO:0009986,GO:0034711,GO:0010628,GO:0038092,GO:0043235,GO:0045648,GO:0045944,GO:0046332,GO:0046545,GO:0000082,GO:0001701,GO:0001942,GO:0004674,GO:0004675,GO:0004702,GO:0005524,GO:0005829,GO:0010629,GO:0010862,GO:0016361,GO:0017002,GO:0018107,GO:0046777,GO:0019838,GO:0046872,GO:0023014,GO:0048179,GO:0030308,GO:…	integral component of plasma membrane|regulation of transcription, DNA-templated|protein phosphorylation|signal transduction|central nervous system development|activin receptor signaling pathway|regulation of signal transduction|positive regulation of activin receptor signaling pathway|cell surface|inhibin binding|positive regulation of gene expression|nodal signaling pathway|receptor complex|pos…	rno04350,rno04060,rno04550	TGF-beta signaling pathway|Cytokine-cytokine receptor interaction|Signaling pathways regulating pluripotency of stem cells
Acvr1c	0.609951	0.367375	1.43332	0.0394094	0.0521672	0.0730145	0.128536	0.382856	0.159101	0.769209	0.557375	1.00671	GeneID:245921,Genbank:NM_139090.1,RGD:621789	activin A receptor type 1C	GO:0005886,GO:0006468,GO:0007181,GO:0007368,GO:0009749,GO:0023014,GO:0030154,GO:0009986,GO:0014070,GO:0030262,GO:0030901,GO:0046676,GO:0032868,GO:0046872,GO:0048179,GO:0033993,GO:0048185,GO:0001541,GO:0070700,GO:0001701,GO:1901164,GO:0002021,GO:0004674,GO:0004702,GO:0005524,GO:0005737,GO:0016361,GO:0019838,GO:0019915,GO:0038092,GO:0021549,GO:0038100,GO:0021766,GO:0042493,GO:0042981,GO:0043280,GO:…	plasma membrane|protein phosphorylation|transforming growth factor beta receptor complex assembly|determination of left/right symmetry|response to glucose|signal transduction by protein phosphorylation|cell differentiation|cell surface|response to organic cyclic compound|apoptotic nuclear changes|midbrain development|negative regulation of insulin secretion|response to insulin|metal ion binding|a…	rno04350,rno04550	TGF-beta signaling pathway|Signaling pathways regulating pluripotency of stem cells
Acvr2a	20.9739	18.9775	20.4765	13.787	14.7472	14.3882	12.8146	14.8318	16.0749	20.0751	20.8624	23.3171	GeneID:29263,Genbank:XM_008761703.2,RGD:70911	activin A receptor type 2A	GO:0006468,GO:0007283,GO:0007368,GO:0007498,GO:0016362,GO:0017002,GO:0008584,GO:0009952,GO:0019838,GO:0023014,GO:0030165,GO:0034673,GO:0034711,GO:0030501,GO:0042713,GO:0043084,GO:0001702,GO:0048179,GO:0048185,GO:0043235,GO:0001934,GO:0004674,GO:0004675,GO:0004702,GO:0005524,GO:0048706,GO:0005737,GO:0050999,GO:0009966,GO:0009986,GO:0010033,GO:0010862,GO:0030509,GO:0015026,GO:0016021,GO:0030510,GO:…	protein phosphorylation|spermatogenesis|determination of left/right symmetry|mesoderm development|activin receptor activity, type II|activin-activated receptor activity|male gonad development|anterior/posterior pattern specification|growth factor binding|signal transduction by protein phosphorylation|PDZ domain binding|inhibin-betaglycan-ActRII complex|inhibin binding|positive regulation of bone …	rno04350,rno04060,rno04550,rno05418	TGF-beta signaling pathway|Cytokine-cytokine receptor interaction|Signaling pathways regulating pluripotency of stem cells|Fluid shear stress and atherosclerosis
Acvr2b	4.94683	3.7983	4.32488	1.37718	1.40653	1.5166	1.76519	1.43124	2.70005	4.13071	3.59515	4.28973	GeneID:25366,Genbank:XM_006244072.3,RGD:2028	activin A receptor type 2B	GO:0001974,GO:0004674,GO:0004675,GO:0004702,GO:0004712,GO:0007507,GO:0005524,GO:0009749,GO:0005737,GO:0009791,GO:0009952,GO:0030509,GO:0009966,GO:0031016,GO:0016021,GO:0032147,GO:0032924,GO:0000122,GO:0048185,GO:0032927,GO:0001501,GO:0001702,GO:0048617,GO:0001822,GO:0048705,GO:0001946,GO:0050431,GO:0060021,GO:0005886,GO:0006355,GO:0006468,GO:0007165,GO:0007368,GO:0019838,GO:0007389,GO:0007498,GO:…	blood vessel remodeling|protein serine/threonine kinase activity|transmembrane receptor protein serine/threonine kinase activity|signal transducer, downstream of receptor, with serine/threonine kinase activity|protein serine/threonine/tyrosine kinase activity|heart development|ATP binding|response to glucose|cytoplasm|post-embryonic development|anterior/posterior pattern specification|BMP signali…	rno04350,rno04060,rno04550,rno05418	TGF-beta signaling pathway|Cytokine-cytokine receptor interaction|Signaling pathways regulating pluripotency of stem cells|Fluid shear stress and atherosclerosis
Acvrl1	10.4476	13.6868	10.542	12.5935	11.8465	10.3217	7.28542	10.9166	9.00072	7.96228	8.2307	7.67423	GeneID:25237,Genbank:XM_006242303.3,RGD:2029	activin A receptor like type 1	GO:0004675,GO:0004702,GO:0005024,GO:0005025,GO:0005524,GO:0005886,GO:0009986,GO:0010596,GO:0005887,GO:0010629,GO:0006355,GO:0010862,GO:0016361,GO:0019901,GO:0023014,GO:0045893,GO:0030308,GO:0045944,GO:0030336,GO:0046332,GO:0030425,GO:0046872,GO:0048185,GO:0048514,GO:0001525,GO:0098821,GO:0050431,GO:0001666,GO:2000279,GO:0001701,GO:0051291,GO:0001937,GO:0001938,GO:0001946,GO:0001974,GO:0003203,GO:…	transmembrane receptor protein serine/threonine kinase activity|signal transducer, downstream of receptor, with serine/threonine kinase activity|transforming growth factor beta-activated receptor activity|transforming growth factor beta receptor activity, type I|ATP binding|plasma membrane|cell surface|negative regulation of endothelial cell migration|integral component of plasma membrane|negativ…
Acy1	17.9203	20.179	21.2989	12.2682	14.0041	13.6841	19.8414	12.1727	15.1158	19.7103	17.8545	15.8207	GeneID:300981,Genbank:XM_006243715.3,RGD:2030	aminoacylase 1	GO:0006520,GO:0008237,GO:0030163,GO:0046872,GO:0004046,GO:0005737,GO:0006508	cellular amino acid metabolic process|metallopeptidase activity|protein catabolic process|metal ion binding|aminoacylase activity|cytoplasm|proteolysis	rno00220	Arginine biosynthesis
Acy3	9.91991	6.99997	7.67077	3.40255	3.38797	4.03618	3.52189	2.84189	5.35189	6.02599	5.88999	5.85307	GeneID:293653,Genbank:XM_008760099.1,RGD:1305394	aminoacylase 3	GO:0016324,GO:0016788,GO:0042802,GO:0046872,GO:0004046,GO:0005737,GO:0016020	apical plasma membrane|hydrolase activity, acting on ester bonds|identical protein binding|metal ion binding|aminoacylase activity|cytoplasm|membrane
Acyp1	3.54544	4.64816	3.7931	3.69193	3.21734	4.186	2.46302	3.04491	3.29923	3.37784	4.19211	3.4202	GeneID:299203,Genbank:XM_017594098.1,RGD:1311327	acylphosphatase 1	GO:0003998	acylphosphatase activity	rno00620	Pyruvate metabolism
Acyp2	1.22782	1.28841	1.29071	2.21345	1.45708	2.28597	1.01105	1.68539	0.618876	0.953579	1.32072	0.848986	GeneID:364224,Genbank:XM_017599325.1,RGD:1595836	acylphosphatase 2	GO:0003998,GO:0042802	acylphosphatase activity|identical protein binding	rno00620	Pyruvate metabolism
Ada	25.5414	18.021	17.1306	14.5251	12.0583	13.4555	10.5462	15.4269	11.4518	14.6945	22.5589	21.8761	GeneID:24165,Genbank:NM_130399.2,RGD:2031	adenosine deaminase	GO:0002636,GO:0002686,GO:0002906,GO:0004000,GO:0008270,GO:0005615,GO:0005737,GO:0009168,GO:0009897,GO:0009986,GO:0010460,GO:0042542,GO:0016020,GO:0043025,GO:0030054,GO:0043066,GO:0030324,GO:0043103,GO:0043278,GO:0045187,GO:0045580,GO:0001666,GO:0048566,GO:0045582,GO:0050728,GO:0045987,GO:0001701,GO:0050850,GO:0046061,GO:0001821,GO:0050862,GO:0001829,GO:0050870,GO:0001883,GO:0060169,GO:0001889,GO:…	positive regulation of germinal center formation|negative regulation of leukocyte migration|negative regulation of mature B cell apoptotic process|adenosine deaminase activity|zinc ion binding|extracellular space|cytoplasm|purine ribonucleoside monophosphate biosynthetic process|external side of plasma membrane|cell surface|positive regulation of heart rate|response to hydrogen peroxide|membrane|…	rno00230,rno05340	Purine metabolism|Primary immunodeficiency
Adad1	0.0738157	0.0705217	0.143692	0.143973	0.036301	0.12702	0.162623	0.166509	0.235262	0.223025	0.293256	0.198916	GeneID:294979,Genbank:XM_006232278.3,RGD:1359309	adenosine deaminase domain containing 1	GO:0005634,GO:0006396,GO:0006417,GO:0007275,GO:0007286,GO:0003723,GO:0004000	nucleus|RNA processing|regulation of translation|multicellular organism development|spermatid development|RNA binding|adenosine deaminase activity
Adad2	0	0	0	0	0	0.00964486	0	0	0	0	0	0	GeneID:691275,Genbank:XM_008772652.1,RGD:1586236	adenosine deaminase domain containing 2	GO:0003723,GO:0004000,GO:0006396	RNA binding|adenosine deaminase activity|RNA processing
Adal	3.4114	3.25237	3.38547	2.34992	2.27042	1.97141	2.57411	2.45221	2.69685	2.96158	3.21333	3.14424	GeneID:311352,Genbank:XM_008762166.2,RGD:1359517	adenosine deaminase-like	GO:0005829,GO:0006154,GO:0043103,GO:0046103,GO:0004000	cytosol|adenosine catabolic process|hypoxanthine salvage|inosine biosynthetic process|adenosine deaminase activity
Adam10	50.9839	48.5686	52.1213	47.1281	39.5108	44.8222	87.0319	48.1432	71.0161	53.9593	57.9137	59.2221	GeneID:29650,Genbank:XM_017595514.1,RGD:2032	ADAM metallopeptidase domain 10	GO:0005615,GO:0005634,GO:0005737,GO:0005794,GO:0007162,GO:0007219,GO:0005798,GO:0008237,GO:0016485,GO:0008284,GO:0017124,GO:0019901,GO:0030307,GO:0000139,GO:0046872,GO:0001701,GO:0051088,GO:0030335,GO:0034205,GO:0051089,GO:0004175,GO:0004222,GO:0097038,GO:0097197,GO:0005802,GO:0006468,GO:0006509,GO:0009986,GO:0010820,GO:0014069,GO:0034612,GO:0016020,GO:0042117,GO:0016021,GO:0042803,GO:0043197,GO:…	extracellular space|nucleus|cytoplasm|Golgi apparatus|negative regulation of cell adhesion|Notch signaling pathway|Golgi-associated vesicle|metallopeptidase activity|protein processing|positive regulation of cell proliferation|SH3 domain binding|protein kinase binding|positive regulation of cell growth|Golgi membrane|metal ion binding|in utero embryonic development|PMA-inducible membrane protein …	rno05010	Alzheimer's disease
Adam11	1.0618	1.40594	1.14758	0.318344	0.30414	0.480816	0.517096	0.457175	0.890555	0.675387	0.697083	0.549996	GeneID:360638,Genbank:XM_017597403.1,RGD:1307515	ADAM metallopeptidase domain 11	GO:0016021,GO:0004222,GO:0006508,GO:0007229	integral component of membrane|metalloendopeptidase activity|proteolysis|integrin-mediated signaling pathway
Adam12	4.53582	4.80067	4.73406	31.2032	18.1894	23.5544	7.5318	17.6022	14.5908	4.0529	3.92219	4.77269	GeneID:679837,Genbank:XM_017590240.1,RGD:1583652	ADAM metallopeptidase domain 12	GO:0005615,GO:0005654,GO:0005886,GO:0006508,GO:0008150,GO:0016021,GO:0017124,GO:0045766,GO:0046872,GO:0003674,GO:0004222,GO:0005575	extracellular space|nucleoplasm|plasma membrane|proteolysis|biological_process|integral component of membrane|SH3 domain binding|positive regulation of angiogenesis|metal ion binding|molecular_function|metalloendopeptidase activity|cellular_component
Adam15	18.7586	20.4724	19.0895	27.2186	24.3185	21.5906	15.111	20.9388	16.0641	15.7379	15.0987	15.6684	GeneID:57025,Genbank:XM_006232744.3,RGD:620402	ADAM metallopeptidase domain 15	GO:0070528,GO:0030308,GO:0002418,GO:0098609,GO:0030336,GO:0004222,GO:1900121,GO:0030574,GO:0005178,GO:0005615,GO:0005912,GO:0006508,GO:0006915,GO:0042246,GO:0007229,GO:0042995,GO:0008237,GO:0045087,GO:0008584,GO:0046872,GO:0009986,GO:0001525,GO:0060317,GO:0016021,GO:0001669,GO:0070062,GO:0017124,GO:0001953	protein kinase C signaling|negative regulation of cell growth|immune response to tumor cell|cell-cell adhesion|negative regulation of cell migration|metalloendopeptidase activity|negative regulation of receptor binding|collagen catabolic process|integrin binding|extracellular space|adherens junction|proteolysis|apoptotic process|tissue regeneration|integrin-mediated signaling pathway|cell project…
Adam17	22.082	24.6499	23.2076	30.7549	21.0611	26.9032	63.0323	32.4249	38.9836	20.8743	22.9797	22.7605	GeneID:57027,Genbank:NM_020306.2,RGD:620404	ADAM metallopeptidase domain 17	GO:0005112,GO:0005138,GO:0005178,GO:0005615,GO:0006509,GO:0005737,GO:0005829,GO:0007155,GO:0007173,GO:0010977,GO:0007219,GO:0015629,GO:0007220,GO:0016020,GO:0016324,GO:0017124,GO:0001666,GO:0032587,GO:0030165,GO:0001934,GO:0032722,GO:0030183,GO:0002467,GO:0002532,GO:0033025,GO:0004222,GO:0033077,GO:0033627,GO:0048536,GO:0048679,GO:0035313,GO:0048870,GO:0050830,GO:0051088,GO:0051272,GO:0071403,GO:…	Notch binding|interleukin-6 receptor binding|integrin binding|extracellular space|membrane protein ectodomain proteolysis|cytoplasm|cytosol|cell adhesion|epidermal growth factor receptor signaling pathway|negative regulation of neuron projection development|Notch signaling pathway|actin cytoskeleton|Notch receptor processing|membrane|apical plasma membrane|SH3 domain binding|response to hypoxia|r…	rno04330,rno05010	Notch signaling pathway|Alzheimer's disease
Adam18	0.0386439	0.00738389	0.0424803	0.0976254	0.0182441	0.0425582	0.497197	0.189683	0.30139	0.014945	0.0554671	0.0144885	GeneID:57029,Genbank:XM_017600383.1,RGD:620405	ADAM metallopeptidase domain 18	GO:0007283,GO:0016021,GO:0030154,GO:0004222,GO:0006508,GO:0007275	spermatogenesis|integral component of membrane|cell differentiation|metalloendopeptidase activity|proteolysis|multicellular organism development
Adam19	21.3589	22.6063	19.7752	68.1684	65.5257	62.9581	25.6106	62.2052	32.4945	18.6251	19.4256	16.8021	GeneID:303068,Genbank:NM_001160228.1,RGD:1585017	ADAM metallopeptidase domain 19	GO:0005794,GO:0006509,GO:0007507,GO:0008150,GO:0009897,GO:0016021,GO:0017124,GO:0046872,GO:0003674,GO:0004222,GO:0005575	Golgi apparatus|membrane protein ectodomain proteolysis|heart development|biological_process|external side of plasma membrane|integral component of membrane|SH3 domain binding|metal ion binding|molecular_function|metalloendopeptidase activity|cellular_component
Adam1a	1.59792	1.17432	1.21446	0.861112	0.815183	0.62849	0.920714	0.906269	0.86252	1.40912	1.45822	1.62941	GeneID:56777,Genbank:NM_020078.1,RGD:621467	ADAM metallopeptidase domain 1A	GO:0006508,GO:0007339,GO:0008237,GO:0008584,GO:0016021,GO:0045121,GO:0046872,GO:0003674,GO:0004222,GO:0005575	proteolysis|binding of sperm to zona pellucida|metallopeptidase activity|male gonad development|integral component of membrane|membrane raft|metal ion binding|molecular_function|metalloendopeptidase activity|cellular_component
Adam2	0	0	0	0.00772806	0	0	0	0.00750767	0	0	0.0106633	0.00974879	GeneID:56806,Genbank:NM_020077.1,RGD:69299	ADAM metallopeptidase domain 2	GO:0016021,GO:0006508,GO:0030534,GO:0007155,GO:0007229,GO:0007283,GO:0007338,GO:0008542,GO:0032991,GO:0008584,GO:0009986,GO:0001669,GO:0010628,GO:0003674,GO:0004222	integral component of membrane|proteolysis|adult behavior|cell adhesion|integrin-mediated signaling pathway|spermatogenesis|single fertilization|visual learning|protein-containing complex|male gonad development|cell surface|acrosomal vesicle|positive regulation of gene expression|molecular_function|metalloendopeptidase activity
Adam22	6.4322	5.57233	4.75134	1.23692	1.11809	1.06531	0.73673	1.46908	1.56462	2.7383	3.21356	1.72028	GeneID:57033,Genbank:XM_017592940.1,RGD:1585016	ADAM metallopeptidase domain 22	GO:0014037,GO:0016021,GO:0022011,GO:0030424,GO:0042063,GO:0004222,GO:0006508,GO:0008344	Schwann cell differentiation|integral component of membrane|myelination in peripheral nervous system|axon|gliogenesis|metalloendopeptidase activity|proteolysis|adult locomotory behavior
Adam23	4.38062	5.53203	4.8739	5.43192	4.4565	4.79283	1.69252	5.11184	3.60382	2.91576	2.57657	2.66583	GeneID:301460,Genbank:NM_001029899.1,RGD:1305739	ADAM metallopeptidase domain 23	GO:1990830,GO:0004222,GO:0006508,GO:0016021	cellular response to leukemia inhibitory factor|metalloendopeptidase activity|proteolysis|integral component of membrane
Adam24	0	0	0	0	0	0	0	0	0	0	0	0	GeneID:290774,Genbank:XM_017600371.1,RGD:1309066	ADAM metallopeptidase domain 24	GO:0046872,GO:0060468,GO:0004222,GO:0006508,GO:0016021	metal ion binding|prevention of polyspermy|metalloendopeptidase activity|proteolysis|integral component of membrane
Adam26a	0	0	0	0	0	0	0	0	0	0	0	0	GeneID:290763,Genbank:NM_001169119.1,RGD:1559501	a disintegrin and metallopeptidase domain 26A
Adam28	2.27042	0.329805	0.51692	1.40088	0.517136	1.79121	8.75196	2.42475	10.0415	0.474971	0.170155	0.846255	GeneID:290344,Genbank:XM_017599628.1,RGD:727820	ADAM metallopeptidase domain 28	GO:0005886,GO:0006508,GO:0008237,GO:0016021,GO:0046872,GO:0004222,GO:0005739	plasma membrane|proteolysis|metallopeptidase activity|integral component of membrane|metal ion binding|metalloendopeptidase activity|mitochondrion
Adam30	0	0.0069912	0.013407	0.0706844	0	0.0251843	0.0128974	0.0105644	0.0109755	0.00707511	0	0	GeneID:690547,Genbank:NM_001109600.1,RGD:1594713	ADAM metallopeptidase domain 30	GO:0016021,GO:0046872,GO:1990913,GO:0004222,GO:0006508,GO:0009897	integral component of membrane|metal ion binding|sperm head plasma membrane|metalloendopeptidase activity|proteolysis|external side of plasma membrane
Adam32	0.253835	0.258674	0.271283	0.106876	0.126495	0.366903	0.432466	0.152689	0.272843	0.597183	0.529158	0.642388	GeneID:361170,Genbank:XM_008771362.2,RGD:735114	ADAM metallopeptidase domain 32	GO:0004222,GO:0006508,GO:0016021	metalloendopeptidase activity|proteolysis|integral component of membrane
Adam33	15.9373	12.9231	15.4576	4.90557	10.5408	7.24977	4.48535	11.0276	9.65465	18.6228	19.543	14.3626	GeneID:311425,Genbank:XM_017592341.1,RGD:1305278	ADAM metallopeptidase domain 33	GO:0006508,GO:0008150,GO:0016021,GO:0046872,GO:0003674,GO:0004222,GO:0005575	proteolysis|biological_process|integral component of membrane|metal ion binding|molecular_function|metalloendopeptidase activity|cellular_component
Adam34	0	0	0	0	0	0	0	0	0	0	0	0	GeneID:685846,Genbank:NM_001135090.1,RGD:1589040	a disintegrin and metallopeptidase domain 34
Adam34l	0	0	0	0	0	0	0	0	0	0	0	0	GeneID:364599,Genbank:XM_006253179.3,RGD:1307052	a disintegrin and metalloprotease domain 34-like	GO:0046872,GO:0004222,GO:0006508,GO:0016021	metal ion binding|metalloendopeptidase activity|proteolysis|integral component of membrane
Adam3a	0	0	0.0092378	0.00749284	0	0.00694106	0.00888665	0.00727916	0.120998	0	0	0	GeneID:57021,Genbank:NM_020302.2,RGD:621469	ADAM metallopeptidase domain 3A	GO:0016021,GO:0004222,GO:0006508,GO:0008584	integral component of membrane|metalloendopeptidase activity|proteolysis|male gonad development
Adam4	1.4818	1.84825	1.71563	0.558154	0.72872	0.892443	1.1698	1.01019	1.38904	1.79084	2.06781	2.22804	GeneID:57022,Genbank:NM_020305.1,RGD:621470	a disintegrin and metalloprotease domain 4	GO:0016021,GO:0046872,GO:0004222,GO:0006508,GO:0007229	integral component of membrane|metal ion binding|metalloendopeptidase activity|proteolysis|integrin-mediated signaling pathway
Adam4l1	1.28763	1.42544	1.46976	0.645421	0.410092	0.541619	0.630397	0.560626	1.3488	1.12637	1.33061	1.59964	GeneID:500688,Genbank:NM_001109277.1,RGD:1597022	a disintegrin and metallopeptidase domain 4-like 1
Adam5	0	0	0	0.00662522	0	0	0.00785764	0	0.0133734	0.00862091	0	0	GeneID:498654,Genbank:XM_006253321.3,RGD:621471	a disintegrin and metallopeptidase domain 5	GO:0016021,GO:0004222,GO:0006508,GO:0008584	integral component of membrane|metalloendopeptidase activity|proteolysis|male gonad development
Adam6	0	0	0	0	0	0	0	0	0	0.00978122	0	0.00948245	GeneID:192271,Genbank:NM_138906.1,RGD:621472	a disintegrin and metallopeptidase domain 6	GO:0008584,GO:0016021,GO:0004222,GO:0006508,GO:0007229	male gonad development|integral component of membrane|metalloendopeptidase activity|proteolysis|integrin-mediated signaling pathway
Adam7	0	0	0	0	0	0.00483589	0	0	0	0	0	0	GeneID:29641,Genbank:NM_020301.1,RGD:62032	ADAM metallopeptidase domain 7	GO:0005886,GO:0006508,GO:0007229,GO:0016021,GO:0045177,GO:0046872,GO:0004175,GO:0004222	plasma membrane|proteolysis|integrin-mediated signaling pathway|integral component of membrane|apical part of cell|metal ion binding|endopeptidase activity|metalloendopeptidase activity
Adam8	2.10679	1.89604	1.5787	5.24721	2.26445	4.26335	39.4303	5.6785	13.3978	1.42178	2.10813	2.73696	GeneID:499285,Genbank:XM_006230501.3,RGD:1566394	ADAM metallopeptidase domain 8	GO:0005575,GO:0005737,GO:0005886,GO:0005887,GO:0006508,GO:0006954,GO:0008150,GO:0048247,GO:0008237,GO:0050729,GO:0008270,GO:0050839,GO:0009986,GO:0051044,GO:0051092,GO:0051897,GO:0070245,GO:0070820,GO:0071065,GO:0071133,GO:0000902,GO:0001525,GO:0002102,GO:0002523,GO:0002675,GO:0002693,GO:0003674,GO:0004222,GO:0005509,GO:0022407,GO:0032010,GO:0032127,GO:0033089,GO:0042581,GO:0043406,GO:0043524,GO:…	cellular_component|cytoplasm|plasma membrane|integral component of plasma membrane|proteolysis|inflammatory response|biological_process|lymphocyte chemotaxis|metallopeptidase activity|positive regulation of inflammatory response|zinc ion binding|cell adhesion molecule binding|cell surface|positive regulation of membrane protein ectodomain proteolysis|positive regulation of NF-kappaB transcription…
Adam9	47.3902	47.6314	49.9283	82.1978	91.4194	87.6394	85.511	86.1748	69.7228	57.2283	53.9515	53.5656	GeneID:290834,Genbank:NM_001014772.1,RGD:621473	ADAM metallopeptidase domain 9	GO:0006509,GO:0007155,GO:0007160,GO:0007179,GO:0008237,GO:0009986,GO:0042117,GO:0010042,GO:0042542,GO:0016021,GO:0043236,GO:0016323,GO:0046872,GO:0050714,GO:0051044,GO:0051088,GO:0051384,GO:0051549,GO:0051592,GO:0000186,GO:0003674,GO:0004222,GO:0005080,GO:0005178,GO:0005518,GO:0005615,GO:0005737,GO:0005886,GO:0016477,GO:0017124,GO:0030216,GO:0031233,GO:0033627,GO:0033630,GO:0033631,GO:0071222,GO:…	membrane protein ectodomain proteolysis|cell adhesion|cell-matrix adhesion|transforming growth factor beta receptor signaling pathway|metallopeptidase activity|cell surface|monocyte activation|response to manganese ion|response to hydrogen peroxide|integral component of membrane|laminin binding|basolateral plasma membrane|metal ion binding|positive regulation of protein secretion|positive regulat…
Adamdec1	0.0903769	0.079702	0.073238	0.304767	0.336418	0.504833	0.774995	2.71989	0.745529	0.21845	0.0748392	0.303005	GeneID:290338,Genbank:XM_017599627.1,RGD:1309861	ADAM-like, decysin 1	GO:0004222,GO:0006508	metalloendopeptidase activity|proteolysis
Adamts1	18.4057	26.3683	28.7293	205.296	150.749	171.613	53.655	151.891	36.7124	27.3308	29.8145	19.1849	GeneID:79252,Genbank:NM_024400.2,RGD:621241	ADAM metallopeptidase with thrombospondin type 1 motif, 1	GO:0071380,GO:0030728,GO:0001822,GO:0031012,GO:0003674,GO:0031410,GO:0004222,GO:0005578,GO:0005604,GO:0006508,GO:0044691,GO:0007229,GO:0060347,GO:0008201,GO:0001542,GO:0071305,GO:0008270,GO:0071374,GO:0010976	cellular response to prostaglandin E stimulus|ovulation|kidney development|extracellular matrix|molecular_function|cytoplasmic vesicle|metalloendopeptidase activity|proteinaceous extracellular matrix|basement membrane|proteolysis|tooth eruption|integrin-mediated signaling pathway|heart trabecula formation|heparin binding|ovulation from ovarian follicle|cellular response to vitamin D|zinc ion bind…
Adamts10	17.4747	15.9216	12.917	13.2212	14.454	12.8714	9.48272	14.5557	16.7633	14.0353	13.8604	12.5274	GeneID:314655,Genbank:NM_001271445.1,RGD:1598320	ADAM metallopeptidase with thrombospondin type 1 motif, 10	GO:0031012,GO:0046872,GO:0001527,GO:0004222,GO:0006508	extracellular matrix|metal ion binding|microfibril|metalloendopeptidase activity|proteolysis
Adamts12	5.81696	5.38897	5.30986	12.5822	10.1943	7.88637	4.33392	8.51228	7.05451	4.3402	3.44574	3.82486	GeneID:294809,Genbank:NM_001106420.3,RGD:1307323	ADAM metallopeptidase with thrombospondin type 1 motif, 12	GO:1902203,GO:0007160,GO:1902548,GO:0008150,GO:2001113,GO:0016477,GO:0030167,GO:0031012,GO:0032331,GO:0046872,GO:0050727,GO:0051603,GO:0071347,GO:0071356,GO:0003674,GO:0071773,GO:0004222,GO:1901509,GO:0005575	negative regulation of hepatocyte growth factor receptor signaling pathway|cell-matrix adhesion|negative regulation of cellular response to vascular endothelial growth factor stimulus|biological_process|negative regulation of cellular response to hepatocyte growth factor stimulus|cell migration|proteoglycan catabolic process|extracellular matrix|negative regulation of chondrocyte differentiation|…
Adamts13	0.842835	0.152624	0.126158	0.892299	0.121367	0.0644587	0.126217	0.0835042	0.14872	0.143804	0.118603	0.206535	GeneID:102554393,Genbank:XM_006233879.2,RGD:1311594	ADAM metallopeptidase with thrombospondin type 1 motif, 13	GO:0071222,GO:0005615,GO:0071346,GO:0071353,GO:0006508,GO:0008233,GO:0009636,GO:0014075,GO:0071356,GO:0034341,GO:0034612,GO:0035864,GO:0043171,GO:0004175,GO:0046872,GO:0070670,GO:0004222	cellular response to lipopolysaccharide|extracellular space|cellular response to interferon-gamma|cellular response to interleukin-4|proteolysis|peptidase activity|response to toxic substance|response to amine|cellular response to tumor necrosis factor|response to interferon-gamma|response to tumor necrosis factor|response to potassium ion|peptide catabolic process|endopeptidase activity|metal io…
Adamts14	2.10284	3.14634	1.26932	3.65782	2.77176	3.45898	1.80581	3.85286	3.07342	0.514174	0.695295	0.974072	GeneID:309837,Genbank:XM_006256449.3,RGD:1308899	ADAM metallopeptidase with thrombospondin type 1 motif, 14	GO:0005576,GO:0006508,GO:0008150,GO:0008233,GO:0008237,GO:0030199,GO:0046872,GO:0003674,GO:0004222,GO:0005575	extracellular region|proteolysis|biological_process|peptidase activity|metallopeptidase activity|collagen fibril organization|metal ion binding|molecular_function|metalloendopeptidase activity|cellular_component
Adamts15	5.56842	5.86739	5.32925	8.73157	5.86812	4.83027	3.88983	8.32071	6.7636	3.04318	3.45263	3.14094	GeneID:300474,Genbank:NM_001106810.1,RGD:1309770	ADAM metallopeptidase with thrombospondin type 1 motif, 15	GO:0005615,GO:0006508,GO:0007229,GO:0008201,GO:0008270,GO:0009986,GO:0050840,GO:0004175,GO:0004222,GO:0005578	extracellular space|proteolysis|integrin-mediated signaling pathway|heparin binding|zinc ion binding|cell surface|extracellular matrix binding|endopeptidase activity|metalloendopeptidase activity|proteinaceous extracellular matrix
Adamts16	0.0321882	0.0263587	0.0168494	0.420249	0.379908	0.167748	0.0891489	0.590822	2.11385	0.0311209	0.0235719	0.00431005	GeneID:306664,Genbank:XM_003748684.4,RGD:1310046	ADAM metallopeptidase with thrombospondin type 1 motif, 16	GO:0006508,GO:0046872,GO:0048232,GO:1902017,GO:0001658,GO:0003073,GO:0004222	proteolysis|metal ion binding|male gamete generation|regulation of cilium assembly|branching involved in ureteric bud morphogenesis|regulation of systemic arterial blood pressure|metalloendopeptidase activity
Adamts17	1.13355	1.3027	1.10236	1.13521	2.82121	2.19934	1.12922	1.69873	1.23507	0.956982	1.16637	0.850758	GeneID:293004,Genbank:XM_006229360.3,RGD:1308783	ADAM metallopeptidase with thrombospondin type 1 motif, 17	GO:0046872,GO:0003676,GO:0004222,GO:0006508	metal ion binding|nucleic acid binding|metalloendopeptidase activity|proteolysis
Adamts18	0.133018	0.139791	0.0426486	0.0197672	0.062799	0.0274672	0.0351664	0.0288052	0.0648395	0.0450127	0.068188	0.0748076	GeneID:361412,Genbank:NM_001191944.1,RGD:1560118	ADAM metallopeptidase with thrombospondin type 1 motif, 18	GO:0046872,GO:0090331,GO:0001654,GO:0004222,GO:0006508	metal ion binding|negative regulation of platelet aggregation|eye development|metalloendopeptidase activity|proteolysis
Adamts19	1.98382	1.81613	1.36633	0.583091	1.06237	0.536796	0.67008	0.584055	0.785889	0.82471	0.949484	0.758401	GeneID:361332,Genbank:XM_006254755.3,RGD:1308359	ADAM metallopeptidase with thrombospondin type 1 motif, 19	GO:0046872,GO:0004222,GO:0006508,GO:0007229	metal ion binding|metalloendopeptidase activity|proteolysis|integrin-mediated signaling pathway
Adamts2	34.2668	34.0605	30.1889	38.753	43.6884	38.6131	14.4936	42.4653	35.8998	23.1291	21.1207	20.8947	GeneID:287899,Genbank:NM_001137622.1,RGD:1565950	ADAM metallopeptidase with thrombospondin type 1 motif, 2	GO:0005578,GO:0005615,GO:0007229,GO:0007283,GO:0008150,GO:0008233,GO:0008270,GO:0016485,GO:0030199,GO:0030324,GO:0043588,GO:0003674,GO:0004222,GO:0005575	proteinaceous extracellular matrix|extracellular space|integrin-mediated signaling pathway|spermatogenesis|biological_process|peptidase activity|zinc ion binding|protein processing|collagen fibril organization|lung development|skin development|molecular_function|metalloendopeptidase activity|cellular_component
Adamts20	0.066598	0.142401	0.104585	0.202648	0.164693	0.255393	0.438769	0.370847	0.173612	0.14411	0.0910387	0.115928	GeneID:315263,Genbank:XM_008765879.2,RGD:1307725	ADAM metallopeptidase with thrombospondin type 1 motif, 20	GO:0006508,GO:0008270,GO:0009967,GO:0030198,GO:0043066,GO:0045636,GO:0046872,GO:0048070,GO:0004175,GO:0004222,GO:0005615	proteolysis|zinc ion binding|positive regulation of signal transduction|extracellular matrix organization|negative regulation of apoptotic process|positive regulation of melanocyte differentiation|metal ion binding|regulation of developmental pigmentation|endopeptidase activity|metalloendopeptidase activity|extracellular space
Adamts3	0.706858	1.00006	0.57322	1.3403	1.18836	1.67762	3.72386	1.32438	1.37012	0.291294	0.542535	0.492383	GeneID:305253,Genbank:XM_006250774.3,RGD:1310750	ADAM metallopeptidase with thrombospondin type 1, motif 3	GO:0007229,GO:0008233,GO:0010573,GO:0016485,GO:0032964,GO:0046872,GO:1900748,GO:0004175,GO:0004222,GO:0005615	integrin-mediated signaling pathway|peptidase activity|vascular endothelial growth factor production|protein processing|collagen biosynthetic process|metal ion binding|positive regulation of vascular endothelial growth factor signaling pathway|endopeptidase activity|metalloendopeptidase activity|extracellular space
Adamts4	0.829542	1.71473	1.84451	9.31279	12.3305	6.05238	6.99792	7.41414	1.99069	0.780163	0.896871	0.62203	GeneID:66015,Genbank:NM_023959.1,RGD:621242	ADAM metallopeptidase with thrombospondin type 1 motif, 4	GO:0004222,GO:0005578,GO:0005615,GO:0006508,GO:0008237,GO:0016607,GO:0042742,GO:0002020,GO:0044691,GO:0046872	metalloendopeptidase activity|proteinaceous extracellular matrix|extracellular space|proteolysis|metallopeptidase activity|nuclear speck|defense response to bacterium|protease binding|tooth eruption|metal ion binding
Adamts5	15.4483	12.0111	13.0331	10.5443	14.5182	8.59743	6.14528	9.83884	11.2119	16.5451	18.7407	12.8182	GeneID:304135,Genbank:NM_198761.1,RGD:735196	ADAM metallopeptidase with thrombospondin type 1 motif, 5	GO:0005578,GO:0005615,GO:0006508,GO:0007229,GO:0008201,GO:0008270,GO:0042742,GO:0044691,GO:0050840,GO:0003674,GO:0004222,GO:0005575	proteinaceous extracellular matrix|extracellular space|proteolysis|integrin-mediated signaling pathway|heparin binding|zinc ion binding|defense response to bacterium|tooth eruption|extracellular matrix binding|molecular_function|metalloendopeptidase activity|cellular_component
Adamts6	4.18927	4.02513	3.55883	7.17213	6.75697	7.33198	3.69438	7.03437	5.43965	3.46185	3.26409	3.97419	GeneID:361886,Genbank:XM_008760707.2,RGD:1307678	ADAM metallopeptidase with thrombospondin type 1 motif, 6	GO:0007507,GO:0008233,GO:0035904,GO:0046872,GO:0060976,GO:0003279,GO:0004222,GO:0006508	heart development|peptidase activity|aorta development|metal ion binding|coronary vasculature development|cardiac septum development|metalloendopeptidase activity|proteolysis
Adamts7	1.77774	1.62937	1.86684	3.72646	2.2381	2.39156	1.89268	3.16115	3.44239	1.67967	1.65369	1.76113	GeneID:315879,Genbank:NM_001047101.1,RGD:1306713	ADAM metallopeptidase with thrombospondin type 1 motif, 7	GO:0005615,GO:0006508,GO:0008237,GO:0009986,GO:0032331,GO:0046872,GO:0051603,GO:0071347,GO:0071356,GO:0071773,GO:0004222,GO:0005578	extracellular space|proteolysis|metallopeptidase activity|cell surface|negative regulation of chondrocyte differentiation|metal ion binding|proteolysis involved in cellular protein catabolic process|cellular response to interleukin-1|cellular response to tumor necrosis factor|cellular response to BMP stimulus|metalloendopeptidase activity|proteinaceous extracellular matrix
Adamts8	0.30369	0.277791	0.301875	7.86409	8.98376	8.12109	2.82998	9.09503	1.34223	0.574745	0.271607	0.69043	GeneID:300475,Genbank:XM_003750455.4,RGD:1308511	ADAM metallopeptidase with thrombospondin type 1 motif, 8	GO:0008270,GO:0004222,GO:0005578,GO:0006508	zinc ion binding|metalloendopeptidase activity|proteinaceous extracellular matrix|proteolysis
Adamts9	3.10094	4.52446	2.98088	8.11236	7.72139	7.22992	8.05965	7.13868	4.48754	2.94119	3.04238	2.73913	GeneID:312566,Genbank:XM_006236916.3,RGD:1306889	ADAM metallopeptidase with thrombospondin type 1 motif, 9	GO:0043231,GO:0004222,GO:0045636,GO:0005578,GO:0048070,GO:0005615,GO:0005783,GO:0006508,GO:0007229,GO:0090673,GO:0008237,GO:1903671,GO:0008270,GO:0009986,GO:0010596,GO:0003179,GO:0030198,GO:0003229,GO:0035909,GO:0004175	intracellular membrane-bounded organelle|metalloendopeptidase activity|positive regulation of melanocyte differentiation|proteinaceous extracellular matrix|regulation of developmental pigmentation|extracellular space|endoplasmic reticulum|proteolysis|integrin-mediated signaling pathway|endothelial cell-matrix adhesion|metallopeptidase activity|negative regulation of sprouting angiogenesis|zinc io…
Adamtsl1	27.287	23.7544	23.2117	7.13022	5.5172	3.656	5.02255	6.7298	11.5589	16.9362	17.8924	14.075	GeneID:362539,Genbank:XM_017593921.1,RGD:1306439	ADAMTS-like 1	GO:0003674,GO:0005575,GO:0008150	molecular_function|cellular_component|biological_process
Adamtsl2	0.313987	0.945574	0.431447	3.33213	5.16676	3.63644	1.99102	3.69533	1.6073	0.481761	0.657821	0.435056	GeneID:311827,Genbank:XM_231125.8,RGD:1305459	ADAMTS-like 2	GO:0008233,GO:0030198,GO:0030512,GO:0050436,GO:0060481,GO:0005576,GO:0005578,GO:0006508	peptidase activity|extracellular matrix organization|negative regulation of transforming growth factor beta receptor signaling pathway|microfibril binding|lobar bronchus epithelium development|extracellular region|proteinaceous extracellular matrix|proteolysis
Adamtsl3	7.6388	7.66116	7.07044	1.29439	5.42038	2.11979	1.48035	2.49749	2.14365	6.22923	6.58068	3.8035	GeneID:308787,Genbank:NM_001107533.2,RGD:1305155	ADAMTS-like 3	GO:0043231	intracellular membrane-bounded organelle
Adamtsl4	56.8275	53.9908	49.9158	12.3286	20.7187	11.6374	15.2133	19.7146	24.3404	52.4782	47.4095	45.3847	GeneID:310670,Genbank:XM_017590903.1,RGD:1561012	ADAMTS-like 4	GO:0005578,GO:0005614,GO:0005615,GO:0006508,GO:0006915,GO:0008233,GO:0030198,GO:0043065,GO:0002020,GO:0002064	proteinaceous extracellular matrix|interstitial matrix|extracellular space|proteolysis|apoptotic process|peptidase activity|extracellular matrix organization|positive regulation of apoptotic process|protease binding|epithelial cell development
Adamtsl5	6.2951	8.94236	6.01888	3.83193	5.16026	5.66358	5.56367	5.43604	6.10174	6.30521	6.56689	5.13781	GeneID:314626,Genbank:XM_006240915.3,RGD:1305607	ADAMTS-like 5	GO:0005578,GO:0008201,GO:0001527,GO:0005576	proteinaceous extracellular matrix|heparin binding|microfibril|extracellular region
Adap1	11.9948	9.97045	10.4204	2.46009	3.06985	3.30511	4.91404	3.42417	4.45038	5.54114	5.11158	5.38096	GeneID:171097,Genbank:NM_133567.2,RGD:621418	ArfGAP with dual PH domains 1	GO:0005737,GO:0005829,GO:0005886,GO:0043087,GO:0043547,GO:0046872,GO:0048016,GO:1902936,GO:0005096,GO:0005547,GO:0005634	cytoplasm|cytosol|plasma membrane|regulation of GTPase activity|positive regulation of GTPase activity|metal ion binding|inositol phosphate-mediated signaling|phosphatidylinositol bisphosphate binding|GTPase activator activity|phosphatidylinositol-3,4,5-trisphosphate binding|nucleus
Adap2	2.3977	2.21291	2.93412	4.59169	3.23929	4.34697	3.46046	3.16106	4.84465	1.80207	2.13355	2.6375	GeneID:56826,Genbank:XM_017597484.1,RGD:708487	ArfGAP with dual PH domains 2	GO:0043231,GO:0005886,GO:0005546,GO:0043325,GO:0005547,GO:0043533,GO:0007507,GO:0005737,GO:0005740,GO:0043547,GO:0016020,GO:0005829,GO:0046872,GO:0016192,GO:0005096,GO:1902936,GO:0031267,GO:0032012,GO:0005545	intracellular membrane-bounded organelle|plasma membrane|phosphatidylinositol-4,5-bisphosphate binding|phosphatidylinositol-3,4-bisphosphate binding|phosphatidylinositol-3,4,5-trisphosphate binding|inositol 1,3,4,5 tetrakisphosphate binding|heart development|cytoplasm|mitochondrial envelope|positive regulation of GTPase activity|membrane|cytosol|metal ion binding|vesicle-mediated transport|GTPase…
Adar	14.3067	15.2657	14.1533	13.3374	13.9776	12.6893	19.0743	14.09	16.0054	15.123	15.7959	16.385	GeneID:81635,Genbank:XM_006232774.3,RGD:71099	adenosine deaminase, RNA-specific	GO:0003677,GO:0003723,GO:0003726,GO:0005634,GO:0005654,GO:0008150,GO:0005730,GO:0009615,GO:0016553,GO:0016607,GO:0030218,GO:0044530,GO:0031054,GO:0035196,GO:0045070,GO:0045071,GO:0001649,GO:1900369,GO:0045087,GO:0001701,GO:0046872,GO:0002244,GO:0002566,GO:0003674,GO:0005737,GO:0006351,GO:0006355,GO:0006382,GO:0035280,GO:0006397,GO:0006606,GO:0035455,GO:0006611,GO:0043066,GO:0051607,GO:0044387,GO:…	DNA binding|RNA binding|double-stranded RNA adenosine deaminase activity|nucleus|nucleoplasm|biological_process|nucleolus|response to virus|base conversion or substitution editing|nuclear speck|erythrocyte differentiation|supraspliceosomal complex|pre-miRNA processing|production of miRNAs involved in gene silencing by miRNA|positive regulation of viral genome replication|negative regulation of vi…	rno04623,rno05162,rno05164	Cytosolic DNA-sensing pathway|Measles|Influenza A
Adarb1	44.4905	41.0196	43.934	8.16955	9.71629	10.2794	9.22757	8.86259	14.2443	24.8942	25.4958	30.0138	GeneID:25367,Genbank:XM_017601551.1,RGD:2033	adenosine deaminase, RNA-specific, B1	GO:0003726,GO:0004000,GO:0005515,GO:0005634,GO:0005654,GO:0007274,GO:0005730,GO:0007420,GO:0008285,GO:0016553,GO:0044387,GO:0016556,GO:0021610,GO:0045070,GO:0046872,GO:0003723,GO:0097049,GO:0050685,GO:0050884,GO:0003725,GO:0005829,GO:0006382,GO:0006396,GO:0021618,GO:0021965,GO:0006397,GO:0030336,GO:0051726,GO:0035264,GO:0042803,GO:0060384,GO:0060415,GO:0061744	double-stranded RNA adenosine deaminase activity|adenosine deaminase activity|protein binding|nucleus|nucleoplasm|neuromuscular synaptic transmission|nucleolus|brain development|negative regulation of cell proliferation|base conversion or substitution editing|negative regulation of protein kinase activity by regulation of protein phosphorylation|mRNA modification|facial nerve morphogenesis|positi…
Adarb2	0.0336899	0.0751018	0.115733	0.00208603	0	0.00193241	0	0.00202654	0.00421079	0.0108576	0.00575671	0.0157889	GeneID:117088,Genbank:XM_008771689.2,RGD:621519	adenosine deaminase, RNA-specific, B2	GO:0006396,GO:0006397,GO:0046872,GO:0003723,GO:0004000,GO:0005634	RNA processing|mRNA processing|metal ion binding|RNA binding|adenosine deaminase activity|nucleus
Adat1	1.58884	1.6645	1.37016	1.12355	0.810457	0.769297	1.12495	0.98078	1.03127	1.50967	1.49414	1.38139	GeneID:690810,Genbank:XM_008772535.2,RGD:1591020	adenosine deaminase, tRNA-specific 1	GO:0003723,GO:0008033,GO:0008251	RNA binding|tRNA processing|tRNA-specific adenosine deaminase activity
Adat2	3.38149	4.30745	4.18865	3.36584	3.48068	3.27899	3.26103	2.62509	4.19451	4.68814	4.97132	4.36554	GeneID:361453,Genbank:NM_001115028.1,RGD:1309642	adenosine deaminase, tRNA-specific 2
Adat3	1.76735	2.00612	1.63503	1.70324	1.33556	1.32488	1.69625	1.22521	1.78466	1.33655	1.97342	1.65656	GeneID:100125374,Genbank:XM_017594558.1,RGD:1642417	adenosine deaminase, tRNA-specific 3	GO:0046872,GO:0008033,GO:0009451,GO:0019239	metal ion binding|tRNA processing|RNA modification|deaminase activity
Adck1	1.78768	1.71798	1.98543	1.36355	1.35268	1.58618	1.34302	1.62919	1.83889	2.22296	1.85442	2.34288	GeneID:366698,Genbank:XM_017594261.1,RGD:1308263	aarF domain containing kinase 1	GO:0004672,GO:0005524,GO:0006468	protein kinase activity|ATP binding|protein phosphorylation
Adck2	8.50746	8.78131	7.69546	6.2736	6.82862	6.81698	6.86294	5.76039	8.05237	7.69493	9.16781	9.0694	GeneID:312258,Genbank:NM_001107855.1,RGD:1311058	aarF domain containing kinase 2	GO:0016301,GO:0016310	kinase activity|phosphorylation
Adck3	10.0702	7.68376	10.6224	3.42197	3.41107	3.76808	3.64161	3.33832	5.70553	9.84833	7.92891	8.91403	GeneID:360887,Genbank:XM_006250387.1,RGD:1308245	aarF domain containing kinase 3	GO:0016310,GO:0005739,GO:0031314,GO:0006468,GO:0006744,GO:0043531,GO:0016021,GO:0016301,GO:0004672,GO:0005524	phosphorylation|mitochondrion|extrinsic component of mitochondrial inner membrane|protein phosphorylation|ubiquinone biosynthetic process|ADP binding|integral component of membrane|kinase activity|protein kinase activity|ATP binding
Adck4	10.3937	10.1787	10.8489	9.69131	9.72837	9.11791	11.2247	9.88896	10.5539	10.7278	12.7106	13.0956	GeneID:308453,Genbank:XM_017589119.1,RGD:1311356	aarF domain containing kinase 4	GO:0031314,GO:0005739,GO:0031966,GO:0005829,GO:0005886,GO:0006468,GO:0006744,GO:0016021,GO:0016301,GO:0004672,GO:0021692,GO:0005524	extrinsic component of mitochondrial inner membrane|mitochondrion|mitochondrial membrane|cytosol|plasma membrane|protein phosphorylation|ubiquinone biosynthetic process|integral component of membrane|kinase activity|protein kinase activity|cerebellar Purkinje cell layer morphogenesis|ATP binding
Adck5	9.25508	8.99868	9.6102	6.74558	5.74451	7.23822	8.03373	7.76374	9.22888	9.6309	10.8719	10.2822	GeneID:362943,Genbank:NM_001135798.1,RGD:1305504	aarF domain containing kinase 5	GO:0016021	integral component of membrane
Adcy1	46.6371	42.2896	48.2764	1.43521	8.26388	5.84004	13.4444	6.66792	23.4561	30.0262	24.1839	34.2273	GeneID:305509,Genbank:XM_017599234.1,RGD:1309318	adenylate cyclase 1	GO:0042493,GO:0007616,GO:0005524,GO:0042752,GO:0007623,GO:0005634,GO:0046872,GO:0008074,GO:0005737,GO:0005886,GO:0006171,GO:0008294,GO:0006182,GO:0009190,GO:0007165,GO:0010226,GO:0007189,GO:0016021,GO:0007193,GO:0004016,GO:0019933,GO:0007409,GO:0035556,GO:0007420,GO:0004383	response to drug|long-term memory|ATP binding|regulation of circadian rhythm|circadian rhythm|nucleus|metal ion binding|guanylate cyclase complex, soluble|cytoplasm|plasma membrane|cAMP biosynthetic process|calcium- and calmodulin-responsive adenylate cyclase activity|cGMP biosynthetic process|cyclic nucleotide biosynthetic process|signal transduction|response to lithium ion|adenylate cyclase-act…	rno00230,rno04015,rno04371,rno04020,rno04072,rno04024,rno04022,rno04114,rno04540,rno04611,rno04062,rno04911,rno04923,rno04912,rno04913,rno04915,rno04914,rno04921,rno04926,rno04918,rno04916,rno04925,rno04927,rno04261,rno04270,rno04970,rno04971,rno04972,rno04976,rno04724,rno04727,rno04725,rno04720,rno04723,rno04750,rno04211,rno04213,rno04713,rno04714,rno05200,rno05032,rno05414,rno04934,rno05166,rno…	Purine metabolism|Rap1 signaling pathway|Apelin signaling pathway|Calcium signaling pathway|Phospholipase D signaling pathway|cAMP signaling pathway|cGMP - PKG signaling pathway|Oocyte meiosis|Gap junction|Platelet activation|Chemokine signaling pathway|Insulin secretion|Regulation of lipolysis in adipocyte|GnRH signaling pathway|Ovarian Steroidogenesis|Estrogen signaling pathway|Progesterone-med…
Adcy10	0.499842	0.428474	0.329301	0.386657	0.320565	0.400599	0.343937	0.457182	0.477537	0.532919	0.515968	0.269552	GeneID:59320,Genbank:XM_008769677.2,RGD:708450	adenylate cyclase 10 (soluble)	GO:0005634,GO:0005737,GO:0005739,GO:0005829,GO:0005886,GO:0006171,GO:0043025,GO:0043065,GO:0045177,GO:0007283,GO:0045178,GO:0048471,GO:0051117,GO:0071241,GO:0071890,GO:0000287,GO:0003351,GO:0004016,GO:0005524,GO:0015630,GO:0016020,GO:0030145,GO:0030424,GO:0030425,GO:0030426,GO:0031514,GO:0035556	nucleus|cytoplasm|mitochondrion|cytosol|plasma membrane|cAMP biosynthetic process|neuronal cell body|positive regulation of apoptotic process|apical part of cell|spermatogenesis|basal part of cell|perinuclear region of cytoplasm|ATPase binding|cellular response to inorganic substance|bicarbonate binding|magnesium ion binding|epithelial cilium movement|adenylate cyclase activity|ATP binding|microt…	rno00230,rno04371,rno04024,rno04713,rno04714	Purine metabolism|Apelin signaling pathway|cAMP signaling pathway|Circadian entrainment|Thermogenesis
Adcy2	0.714983	0.670657	0.672831	1.08665	1.44225	1.19005	0.555609	0.877368	0.755526	0.634716	0.333195	0.523943	GeneID:81636,Genbank:NM_031007.1,RGD:619965	adenylate cyclase 2	GO:0005737,GO:0005886,GO:0005887,GO:0019933,GO:0006171,GO:0030145,GO:0030425,GO:0006182,GO:0031683,GO:0032991,GO:0035556,GO:0045121,GO:0046982,GO:0000166,GO:0000287,GO:0004016,GO:0004383,GO:0005515,GO:0005524,GO:0005622,GO:0007165,GO:0007188,GO:0007189,GO:0008074,GO:0008179,GO:0009190,GO:1904322,GO:0016020,GO:0016021	cytoplasm|plasma membrane|integral component of plasma membrane|cAMP-mediated signaling|cAMP biosynthetic process|manganese ion binding|dendrite|cGMP biosynthetic process|G-protein beta/gamma-subunit complex binding|protein-containing complex|intracellular signal transduction|membrane raft|protein heterodimerization activity|nucleotide binding|magnesium ion binding|adenylate cyclase activity|guan…	rno00230,rno04015,rno04371,rno04020,rno04072,rno04024,rno04022,rno04114,rno04540,rno04611,rno04062,rno04911,rno04922,rno04923,rno04912,rno04913,rno04915,rno04914,rno04921,rno04926,rno04918,rno04916,rno04925,rno04927,rno04261,rno04270,rno04970,rno04971,rno04972,rno04976,rno04724,rno04727,rno04725,rno04723,rno04750,rno04211,rno04213,rno04713,rno04714,rno05200,rno05032,rno05414,rno04934,rno05166,rno…	Purine metabolism|Rap1 signaling pathway|Apelin signaling pathway|Calcium signaling pathway|Phospholipase D signaling pathway|cAMP signaling pathway|cGMP - PKG signaling pathway|Oocyte meiosis|Gap junction|Platelet activation|Chemokine signaling pathway|Insulin secretion|Glucagon signaling pathway|Regulation of lipolysis in adipocyte|GnRH signaling pathway|Ovarian Steroidogenesis|Estrogen signali…
Adcy3	10.6205	11.4787	10.4271	7.87206	8.9318	9.01197	6.25321	8.44824	8.06951	7.89298	6.52042	7.69075	GeneID:64508,Genbank:XM_006239849.3,RGD:71009	adenylate cyclase 3	GO:0005737,GO:0005794,GO:0005886,GO:0005929,GO:0007193,GO:0007338,GO:0006171,GO:0007340,GO:0007608,GO:0019933,GO:0030317,GO:0008074,GO:0035556,GO:0045121,GO:0046872,GO:0004016,GO:1904322,GO:0004383,GO:0005516,GO:0005524,GO:0005622,GO:0005634,GO:0006182,GO:0007143,GO:0007165,GO:0007189,GO:0008294,GO:0008355,GO:0009190,GO:0016020,GO:0016021	cytoplasm|Golgi apparatus|plasma membrane|cilium|adenylate cyclase-inhibiting G-protein coupled receptor signaling pathway|single fertilization|cAMP biosynthetic process|acrosome reaction|sensory perception of smell|cAMP-mediated signaling|flagellated sperm motility|guanylate cyclase complex, soluble|intracellular signal transduction|membrane raft|metal ion binding|adenylate cyclase activity|cell…	rno00230,rno04015,rno04371,rno04020,rno04072,rno04024,rno04022,rno04114,rno04540,rno04611,rno04062,rno04911,rno04923,rno04912,rno04913,rno04915,rno04914,rno04921,rno04926,rno04918,rno04916,rno04925,rno04927,rno04261,rno04270,rno04970,rno04971,rno04972,rno04976,rno04962,rno04724,rno04727,rno04725,rno04723,rno04740,rno04750,rno04211,rno04213,rno04713,rno04714,rno05200,rno05032,rno05414,rno04934,rno…	Purine metabolism|Rap1 signaling pathway|Apelin signaling pathway|Calcium signaling pathway|Phospholipase D signaling pathway|cAMP signaling pathway|cGMP - PKG signaling pathway|Oocyte meiosis|Gap junction|Platelet activation|Chemokine signaling pathway|Insulin secretion|Regulation of lipolysis in adipocyte|GnRH signaling pathway|Ovarian Steroidogenesis|Estrogen signaling pathway|Progesterone-med…
Adcy4	5.28913	7.33719	4.95973	9.41767	7.31053	6.74943	8.44036	6.79678	5.61037	3.76241	3.71816	3.36479	GeneID:54223,Genbank:XM_017599787.1,RGD:2034	adenylate cyclase 4	GO:0031683,GO:0007165,GO:0004383,GO:0032991,GO:0007188,GO:0005080,GO:0035556,GO:0005524,GO:0005622,GO:0005737,GO:0008074,GO:0046872,GO:0009190,GO:0005886,GO:0016020,GO:0016021,GO:0006171,GO:0004016,GO:0030425,GO:0006182	G-protein beta/gamma-subunit complex binding|signal transduction|guanylate cyclase activity|protein-containing complex|adenylate cyclase-modulating G-protein coupled receptor signaling pathway|protein kinase C binding|intracellular signal transduction|ATP binding|intracellular|cytoplasm|guanylate cyclase complex, soluble|metal ion binding|cyclic nucleotide biosynthetic process|plasma membrane|mem…	rno00230,rno04015,rno04371,rno04020,rno04072,rno04024,rno04022,rno04114,rno04540,rno04611,rno04062,rno04911,rno04923,rno04912,rno04913,rno04915,rno04914,rno04921,rno04926,rno04918,rno04916,rno04925,rno04927,rno04261,rno04270,rno04970,rno04971,rno04972,rno04976,rno04724,rno04727,rno04725,rno04723,rno04742,rno04750,rno04211,rno04213,rno04713,rno04714,rno05200,rno05032,rno05414,rno04934,rno05166,rno…	Purine metabolism|Rap1 signaling pathway|Apelin signaling pathway|Calcium signaling pathway|Phospholipase D signaling pathway|cAMP signaling pathway|cGMP - PKG signaling pathway|Oocyte meiosis|Gap junction|Platelet activation|Chemokine signaling pathway|Insulin secretion|Regulation of lipolysis in adipocyte|GnRH signaling pathway|Ovarian Steroidogenesis|Estrogen signaling pathway|Progesterone-med…
Adcy5	27.0542	24.7887	27.8431	8.8932	13.2697	10.7981	7.71781	12.3494	13.6239	24.1651	20.6263	22.569	GeneID:64532,Genbank:NM_022600.1,RGD:71014	adenylate cyclase 5	GO:0005886,GO:0005929,GO:0007195,GO:0006171,GO:0007204,GO:0007420,GO:0007507,GO:0019933,GO:0007568,GO:0042383,GO:0007626,GO:0043278,GO:0045111,GO:0045121,GO:0046872,GO:0001973,GO:0046982,GO:0004016,GO:0050885,GO:0004383,GO:0005524,GO:0005768,GO:0006182,GO:0007165,GO:0007189,GO:0008074,GO:0007191,GO:0008179,GO:0007193,GO:0008294,GO:0009190,GO:0010977,GO:0016020,GO:0016021,GO:0061178,GO:0097110,GO:…	plasma membrane|cilium|adenylate cyclase-inhibiting dopamine receptor signaling pathway|cAMP biosynthetic process|positive regulation of cytosolic calcium ion concentration|brain development|heart development|cAMP-mediated signaling|aging|sarcolemma|locomotory behavior|response to morphine|intermediate filament cytoskeleton|membrane raft|metal ion binding|adenosine receptor signaling pathway|prot…	rno00230,rno04015,rno04371,rno04072,rno04024,rno04022,rno04114,rno04540,rno04611,rno04062,rno04911,rno04923,rno04912,rno04913,rno04915,rno04914,rno04921,rno04926,rno04918,rno04916,rno04924,rno04925,rno04927,rno04261,rno04270,rno04970,rno04971,rno04972,rno04976,rno04724,rno04727,rno04725,rno04728,rno04726,rno04723,rno04750,rno04211,rno04213,rno04713,rno04714,rno05200,rno05012,rno05030,rno05031,rno…	Purine metabolism|Rap1 signaling pathway|Apelin signaling pathway|Phospholipase D signaling pathway|cAMP signaling pathway|cGMP - PKG signaling pathway|Oocyte meiosis|Gap junction|Platelet activation|Chemokine signaling pathway|Insulin secretion|Regulation of lipolysis in adipocyte|GnRH signaling pathway|Ovarian Steroidogenesis|Estrogen signaling pathway|Progesterone-mediated oocyte maturation|Ox…
Adcy6	19.1097	18.5473	18.2428	9.8731	10.075	11.0475	14.984	12.2786	15.8224	15.5882	15.2517	17.0152	GeneID:25289,Genbank:XM_017594670.1,RGD:2035	adenylate cyclase 6	GO:0005080,GO:0005102,GO:0005524,GO:0005622,GO:0005768,GO:0005886,GO:0007189,GO:0007193,GO:0007212,GO:0008074,GO:0008294,GO:0035811,GO:0042383,GO:0009190,GO:0045121,GO:0046872,GO:0071380,GO:0000149,GO:0071870,GO:0003091,GO:0072660,GO:0004016,GO:0004383,GO:0005929,GO:0006171,GO:0006182,GO:0010977,GO:0007165,GO:0016020,GO:0016021,GO:0019901,GO:0019933,GO:0031226,GO:0097110,GO:0097746,GO:0031528,GO:…	protein kinase C binding|signaling receptor binding|ATP binding|intracellular|endosome|plasma membrane|adenylate cyclase-activating G-protein coupled receptor signaling pathway|adenylate cyclase-inhibiting G-protein coupled receptor signaling pathway|dopamine receptor signaling pathway|guanylate cyclase complex, soluble|calcium- and calmodulin-responsive adenylate cyclase activity|negative regula…	rno00230,rno04015,rno04371,rno04072,rno04024,rno04022,rno04114,rno04540,rno04611,rno04062,rno04911,rno04923,rno04912,rno04913,rno04915,rno04914,rno04921,rno04926,rno04918,rno04916,rno04924,rno04925,rno04927,rno04261,rno04270,rno04970,rno04971,rno04972,rno04976,rno04962,rno04961,rno04724,rno04727,rno04725,rno04723,rno04742,rno04750,rno04211,rno04213,rno04713,rno04714,rno05200,rno05032,rno05414,rno…	Purine metabolism|Rap1 signaling pathway|Apelin signaling pathway|Phospholipase D signaling pathway|cAMP signaling pathway|cGMP - PKG signaling pathway|Oocyte meiosis|Gap junction|Platelet activation|Chemokine signaling pathway|Insulin secretion|Regulation of lipolysis in adipocyte|GnRH signaling pathway|Ovarian Steroidogenesis|Estrogen signaling pathway|Progesterone-mediated oocyte maturation|Ox…
Adcy7	1.19069	1.33321	1.31488	7.01173	6.91191	6.76108	2.97538	6.64825	4.33823	2.34799	1.76888	2.28985	GeneID:84420,Genbank:XM_017601388.1,RGD:619966	adenylate cyclase 7	GO:0046872,GO:0004383,GO:0060135,GO:0005524,GO:0071361,GO:0005886,GO:0006171,GO:0006182,GO:0007165,GO:0007189,GO:0008074,GO:0009190,GO:0004016,GO:0016020,GO:0016021	metal ion binding|guanylate cyclase activity|maternal process involved in female pregnancy|ATP binding|cellular response to ethanol|plasma membrane|cAMP biosynthetic process|cGMP biosynthetic process|signal transduction|adenylate cyclase-activating G-protein coupled receptor signaling pathway|guanylate cyclase complex, soluble|cyclic nucleotide biosynthetic process|adenylate cyclase activity|memb…	rno00230,rno04015,rno04371,rno04020,rno04072,rno04024,rno04022,rno04114,rno04540,rno04611,rno04062,rno04911,rno04923,rno04912,rno04913,rno04915,rno04914,rno04921,rno04926,rno04918,rno04916,rno04925,rno04927,rno04261,rno04270,rno04970,rno04971,rno04972,rno04976,rno04724,rno04727,rno04725,rno04723,rno04750,rno04211,rno04213,rno04713,rno04714,rno05200,rno05032,rno05414,rno04934,rno05166,rno01522	Purine metabolism|Rap1 signaling pathway|Apelin signaling pathway|Calcium signaling pathway|Phospholipase D signaling pathway|cAMP signaling pathway|cGMP - PKG signaling pathway|Oocyte meiosis|Gap junction|Platelet activation|Chemokine signaling pathway|Insulin secretion|Regulation of lipolysis in adipocyte|GnRH signaling pathway|Ovarian Steroidogenesis|Estrogen signaling pathway|Progesterone-med…
Adcy8	0	0.00927935	0	0.0216505	0.0343911	0.0100281	1.23254	0.0350551	0.15296	0	0.0149369	0.00455194	GeneID:29241,Genbank:XM_006241704.3,RGD:2036	adenylate cyclase 8	GO:0047485,GO:0008294,GO:0007165,GO:0004383,GO:0071277,GO:0009190,GO:0007189,GO:0005515,GO:0014070,GO:0005516,GO:0016020,GO:0005524,GO:0005622,GO:0005886,GO:0007193,GO:0016021,GO:0007616,GO:0006171,GO:0019933,GO:0008022,GO:0004016,GO:0035556,GO:0008074,GO:0046872,GO:0006182	protein N-terminus binding|calcium- and calmodulin-responsive adenylate cyclase activity|signal transduction|guanylate cyclase activity|cellular response to calcium ion|cyclic nucleotide biosynthetic process|adenylate cyclase-activating G-protein coupled receptor signaling pathway|protein binding|response to organic cyclic compound|calmodulin binding|membrane|ATP binding|intracellular|plasma memb…	rno00230,rno04015,rno04371,rno04020,rno04072,rno04024,rno04022,rno04114,rno04540,rno04611,rno04062,rno04911,rno04923,rno04912,rno04913,rno04915,rno04914,rno04921,rno04926,rno04918,rno04916,rno04925,rno04927,rno04261,rno04270,rno04970,rno04971,rno04972,rno04976,rno04724,rno04727,rno04725,rno04720,rno04723,rno04742,rno04750,rno04211,rno04213,rno04713,rno04714,rno05200,rno05032,rno05414,rno04934,rno…	Purine metabolism|Rap1 signaling pathway|Apelin signaling pathway|Calcium signaling pathway|Phospholipase D signaling pathway|cAMP signaling pathway|cGMP - PKG signaling pathway|Oocyte meiosis|Gap junction|Platelet activation|Chemokine signaling pathway|Insulin secretion|Regulation of lipolysis in adipocyte|GnRH signaling pathway|Ovarian Steroidogenesis|Estrogen signaling pathway|Progesterone-med…
Adcy9	13.2979	12.531	13.3528	4.64494	5.61735	4.8313	3.13505	4.07211	4.90908	9.48369	8.45423	8.91453	GeneID:302950,Genbank:XM_008767525.2,RGD:1304747	adenylate cyclase 9	GO:0030424,GO:0004016,GO:0030425,GO:0004383,GO:0071880,GO:0005886,GO:0005887,GO:0006171,GO:0006182,GO:0007165,GO:0007189,GO:0008074,GO:0009190,GO:0000166,GO:0016020,GO:0016021	axon|adenylate cyclase activity|dendrite|guanylate cyclase activity|adenylate cyclase-activating adrenergic receptor signaling pathway|plasma membrane|integral component of plasma membrane|cAMP biosynthetic process|cGMP biosynthetic process|signal transduction|adenylate cyclase-activating G-protein coupled receptor signaling pathway|guanylate cyclase complex, soluble|cyclic nucleotide biosyntheti…	rno00230,rno04015,rno04371,rno04020,rno04072,rno04024,rno04022,rno04114,rno04540,rno04611,rno04062,rno04911,rno04923,rno04912,rno04913,rno04915,rno04914,rno04921,rno04926,rno04918,rno04916,rno04925,rno04927,rno04261,rno04270,rno04970,rno04971,rno04972,rno04976,rno04962,rno04961,rno04724,rno04727,rno04725,rno04723,rno04750,rno04211,rno04213,rno04713,rno04714,rno05200,rno05032,rno05414,rno04934,rno…	Purine metabolism|Rap1 signaling pathway|Apelin signaling pathway|Calcium signaling pathway|Phospholipase D signaling pathway|cAMP signaling pathway|cGMP - PKG signaling pathway|Oocyte meiosis|Gap junction|Platelet activation|Chemokine signaling pathway|Insulin secretion|Regulation of lipolysis in adipocyte|GnRH signaling pathway|Ovarian Steroidogenesis|Estrogen signaling pathway|Progesterone-med…
Adcyap1	0.0328368	0.0156857	0.0100269	0	0.00430626	0.00753393	0.00482286	0	0.0205208	0.00529134	0.00561095	0.0102594	GeneID:24166,Genbank:XM_008767418.2,RGD:2037	adenylate cyclase activating polypeptide 1	GO:0005184,GO:0005576,GO:0005615,GO:0005829,GO:0007189,GO:0016521,GO:0007204,GO:0019233,GO:0007218,GO:0019933,GO:0021983,GO:0030073,GO:0045471,GO:0031175,GO:0045786,GO:0045860,GO:0031858,GO:0045944,GO:0046034,GO:0001541,GO:0051428,GO:0001662,GO:0001821,GO:0051968,GO:0001932,GO:0002865,GO:0002878,GO:0005057,GO:0005102,GO:0005179,GO:0008277,GO:0008284,GO:0010469,GO:0010628,GO:0010656,GO:0032755,GO:…	neuropeptide hormone activity|extracellular region|extracellular space|cytosol|adenylate cyclase-activating G-protein coupled receptor signaling pathway|pituitary adenylate cyclase activating polypeptide activity|positive regulation of cytosolic calcium ion concentration|sensory perception of pain|neuropeptide signaling pathway|cAMP-mediated signaling|pituitary gland development|insulin secretion…	rno04911,rno04924	Insulin secretion|Renin secretion
Adcyap1r1	1.06299	1.30676	1.71718	0.721887	0.557609	0.296338	0.315609	0.863563	1.01145	0.884084	1.17967	1.26419	GeneID:24167,Genbank:XM_017592431.1,RGD:2038	adenylate cyclase activating polypeptide 1 receptor type 1	GO:0043235,GO:0019933,GO:0005737,GO:0043950,GO:0030154,GO:0005768,GO:0045471,GO:0030306,GO:0005791,GO:0046545,GO:0005901,GO:0005923,GO:0007166,GO:0007186,GO:0032355,GO:0007202,GO:0051057,GO:0033555,GO:0007283,GO:0060548,GO:0042493,GO:0008179,GO:0060732,GO:0042923,GO:0009986,GO:0000139,GO:0043005,GO:0010524,GO:0001634,GO:0043231,GO:0016021,GO:0004999	receptor complex|cAMP-mediated signaling|cytoplasm|positive regulation of cAMP-mediated signaling|cell differentiation|endosome|response to ethanol|ADP-ribosylation factor binding|rough endoplasmic reticulum|development of primary female sexual characteristics|caveola|bicellular tight junction|cell surface receptor signaling pathway|G-protein coupled receptor signaling pathway|response to estradi…	rno04024,rno04080,rno04911,rno04924,rno04713	cAMP signaling pathway|Neuroactive ligand-receptor interaction|Insulin secretion|Renin secretion|Circadian entrainment
Add1	54.6172	56.4526	57.9537	48.6168	54.5174	49.8917	42.9686	50.1595	50.4503	60.5736	62.2628	62.3366	GeneID:24170,Genbank:XM_006251161.1,RGD:2041	adducin 1	GO:0005654,GO:0005737,GO:0005856,GO:0005886,GO:0016604,GO:0005913,GO:0020027,GO:0030218,GO:0030425,GO:0045296,GO:0030507,GO:0045766,GO:0045807,GO:0030837,GO:0046982,GO:0048471,GO:0048873,GO:0000902,GO:1903393,GO:0051015,GO:0001701,GO:0005198,GO:0005515,GO:0005516,GO:0005634,GO:0006811,GO:0006884,GO:0007010,GO:0008134,GO:0008290,GO:0032092,GO:0014069,GO:0035264,GO:0016020,GO:0042608,GO:0042803,GO:…	nucleoplasm|cytoplasm|cytoskeleton|plasma membrane|nuclear body|cell-cell adherens junction|hemoglobin metabolic process|erythrocyte differentiation|dendrite|cadherin binding|spectrin binding|positive regulation of angiogenesis|positive regulation of endocytosis|negative regulation of actin filament polymerization|protein heterodimerization activity|perinuclear region of cytoplasm|homeostasis of …
Add2	0.0507131	0.051	0.0806873	0.144774	0.224719	0.101044	0.037634	0.0423864	0.0580469	0.0412897	0.0383107	0.157612	GeneID:24171,Genbank:XM_017592433.1,RGD:2042	adducin 2	GO:0014069,GO:0016020,GO:0019901,GO:0030097,GO:0050900,GO:0030507,GO:0050901,GO:0031410,GO:0051015,GO:0051016,GO:0051017,GO:0065003,GO:0003779,GO:0005198,GO:0005200,GO:0005516,GO:0005856,GO:0006811,GO:0008290,GO:0032092,GO:0042803,GO:0044853,GO:0046982	postsynaptic density|membrane|protein kinase binding|hemopoiesis|leukocyte migration|spectrin binding|leukocyte tethering or rolling|cytoplasmic vesicle|actin filament binding|barbed-end actin filament capping|actin filament bundle assembly|protein-containing complex assembly|actin binding|structural molecule activity|structural constituent of cytoskeleton|calmodulin binding|cytoskeleton|ion tran…
Add3	32.5512	34.055	36.5536	20.5249	25.4727	19.1933	25.6513	21.8753	22.1157	27.9379	31.8933	27.6313	GeneID:25230,Genbank:XM_006231600.3,RGD:2043	adducin 3	GO:0042493,GO:0005903,GO:0005080,GO:0045907,GO:0005198,GO:0005911,GO:0005515,GO:0005516,GO:0005654,GO:0005737,GO:0005938,GO:0005856,GO:0014069,GO:0000794,GO:0005886,GO:0016020,GO:0003779	response to drug|brush border|protein kinase C binding|positive regulation of vasoconstriction|structural molecule activity|cell-cell junction|protein binding|calmodulin binding|nucleoplasm|cytoplasm|cell cortex|cytoskeleton|postsynaptic density|condensed nuclear chromosome|plasma membrane|membrane|actin binding
Adgb	0.0239448	0.0869299	0.0570309	0.434114	0.0829	0.181295	1.418	0.318029	0.380682	0.027781	0.0785575	0.0628424	GeneID:292477,Genbank:XM_017590413.1,RGD:1564259	androglobin	GO:0005737,GO:0006508,GO:0004198,GO:0005622	cytoplasm|proteolysis|calcium-dependent cysteine-type endopeptidase activity|intracellular
Adgra1	0.0241886	0.103992	0.077554	0.0404387	0.00951637	0.0332984	0.026645	0.0174602	0.0272093	0.0350799	0.0371988	0.119029	GeneID:309097,Genbank:XM_017590242.1,RGD:1308241	adhesion G protein-coupled receptor A1
Adgra2	56.7265	52.2551	58.7444	31.9139	37.5768	37.6416	19.7606	35.9724	36.9416	41.893	34.3173	36.3136	GeneID:100363275,Genbank:XM_017600376.1,RGD:2323365	adhesion G protein-coupled receptor A2	GO:0007166,GO:0007186,GO:0007417,GO:0009986,GO:0010595,GO:0016021,GO:0043542,GO:0045765,GO:0050920,GO:0090210,GO:1900747,GO:0001525,GO:0002040,GO:0004930	cell surface receptor signaling pathway|G-protein coupled receptor signaling pathway|central nervous system development|cell surface|positive regulation of endothelial cell migration|integral component of membrane|endothelial cell migration|regulation of angiogenesis|regulation of chemotaxis|regulation of establishment of blood-brain barrier|negative regulation of vascular endothelial growth fact…
Adgra3	16.0855	15.8632	16.0312	13.1037	10.1384	13.7738	7.2668	11.1728	11.1788	16.9199	16.1108	17.1102	GeneID:305408,Genbank:XM_003751373.3,RGD:1304914	adhesion G protein-coupled receptor A3	GO:0009897,GO:0016021,GO:0004930,GO:0007166,GO:0007186	external side of plasma membrane|integral component of membrane|G-protein coupled receptor activity|cell surface receptor signaling pathway|G-protein coupled receptor signaling pathway
Adgrb1	0.221429	0.216147	0.149927	0.0214601	0.0378763	0.0165664	0.00424201	0.0312722	0.0613679	0.0511948	0.0296111	0.049631	GeneID:362931,Genbank:NM_001170597.2,RGD:1305608	adhesion G protein-coupled receptor B1	GO:0043652,GO:0016021,GO:0004930,GO:0045087,GO:0016525,GO:0005515,GO:0045211,GO:0030165,GO:0005615,GO:0048167,GO:0005886,GO:0005925,GO:0006910,GO:0006911,GO:0030425,GO:0007166,GO:0048471,GO:0031397,GO:0007186,GO:0050829,GO:0038023,GO:0007399,GO:0051965,GO:0042177,GO:0007517,GO:0001530,GO:1901741,GO:0043197,GO:0010596,GO:0001786,GO:1903428,GO:0043277,GO:0014069,GO:0001891	engulfment of apoptotic cell|integral component of membrane|G-protein coupled receptor activity|innate immune response|negative regulation of angiogenesis|protein binding|postsynaptic membrane|PDZ domain binding|extracellular space|regulation of synaptic plasticity|plasma membrane|focal adhesion|phagocytosis, recognition|phagocytosis, engulfment|dendrite|cell surface receptor signaling pathway|pe…	rno04115	p53 signaling pathway
Adgrb2	1.59696	0.924926	0.895154	0.480682	1.24588	0.996439	0.530231	0.747812	1.06867	0.765443	0.793124	0.992243	GeneID:313058,Genbank:XM_006238935.3,RGD:1309431	adhesion G protein-coupled receptor B2	GO:0005813,GO:0005886,GO:0007166,GO:0007186,GO:0007422,GO:0016021,GO:0016525,GO:0033173,GO:0051965,GO:0004930,GO:0005622	centrosome|plasma membrane|cell surface receptor signaling pathway|G-protein coupled receptor signaling pathway|peripheral nervous system development|integral component of membrane|negative regulation of angiogenesis|calcineurin-NFAT signaling cascade|positive regulation of synapse assembly|G-protein coupled receptor activity|intracellular
Adgrb3	0.349373	0.207596	0.273211	0.0886412	0.288312	0.337252	0.127658	0.233736	0.319514	0.181252	0.248986	0.167729	GeneID:301309,Genbank:NM_001106898.1,RGD:1309703	adhesion G protein-coupled receptor B3	GO:0007166,GO:0007186,GO:0007520,GO:0016021,GO:0016322,GO:0016525,GO:0043083,GO:0043547,GO:0048814,GO:0051965,GO:0061743,GO:0004930,GO:0098794,GO:0005096,GO:0099558,GO:0005886	cell surface receptor signaling pathway|G-protein coupled receptor signaling pathway|myoblast fusion|integral component of membrane|neuron remodeling|negative regulation of angiogenesis|synaptic cleft|positive regulation of GTPase activity|regulation of dendrite morphogenesis|positive regulation of synapse assembly|motor learning|G-protein coupled receptor activity|postsynapse|GTPase activator ac…
Adgrd1	137.954	105.933	118.315	25.2797	34.2659	22.349	18.7162	30.7003	27.9176	58.029	53.9197	57.1041	GeneID:689257,Genbank:XM_017598511.1,RGD:1594795	adhesion G protein-coupled receptor D1	GO:0007166,GO:0007186,GO:0007189,GO:0016021,GO:0004930,GO:0005622,GO:0005886	cell surface receptor signaling pathway|G-protein coupled receptor signaling pathway|adenylate cyclase-activating G-protein coupled receptor signaling pathway|integral component of membrane|G-protein coupled receptor activity|intracellular|plasma membrane
Adgre1	6.24486	6.67504	4.71531	17.5841	10.2045	13.0228	22.2853	12.6027	21.7697	4.31911	5.53086	9.09155	GeneID:316137,Genbank:XM_006244280.3,RGD:1359214	adhesion G protein-coupled receptor E1	GO:0005886,GO:0007166,GO:0007186,GO:0009897,GO:0016021,GO:0071944,GO:0002250,GO:0004930,GO:0005509	plasma membrane|cell surface receptor signaling pathway|G-protein coupled receptor signaling pathway|external side of plasma membrane|integral component of membrane|cell periphery|adaptive immune response|G-protein coupled receptor activity|calcium ion binding
Adgre4	0.293934	0.702044	0.544935	1.3	0.517629	1.08866	1.3198	0.833533	1.59023	0.446581	0.473556	0.4395	GeneID:450235,Genbank:XM_017596590.1,RGD:1359641	adhesion G protein-coupled receptor E4	GO:0007186,GO:0009986,GO:0016021,GO:0004930,GO:0005509,GO:0007166	G-protein coupled receptor signaling pathway|cell surface|integral component of membrane|G-protein coupled receptor activity|calcium ion binding|cell surface receptor signaling pathway
Adgre5	27.1103	25.0294	26.192	17.349	14.5699	15.6687	29.2005	16.4868	17.983	18.3215	13.9518	18.3316	GeneID:361383,Genbank:XM_006255280.1,RGD:1305595	adhesion G protein-coupled receptor E5	GO:0005575,GO:0007166,GO:0007186,GO:0008150,GO:0016021,GO:0051965,GO:0003674,GO:0004930,GO:0005509	cellular_component|cell surface receptor signaling pathway|G-protein coupled receptor signaling pathway|biological_process|integral component of membrane|positive regulation of synapse assembly|molecular_function|G-protein coupled receptor activity|calcium ion binding
Adgrf1	0	0.0280818	0	0.0582401	0	0	2.72842	0.813326	0.668629	0.0189459	0	0	GeneID:301266,Genbank:XM_017596745.1,RGD:1310285	adhesion G protein-coupled receptor F1	GO:0007416,GO:0007613,GO:0031175,GO:0032793,GO:0004930,GO:0005886,GO:0007189	synapse assembly|memory|neuron projection development|positive regulation of CREB transcription factor activity|G-protein coupled receptor activity|plasma membrane|adenylate cyclase-activating G-protein coupled receptor signaling pathway
Adgrf2	0	0.00562073	0	0	0	0.00404949	0.0155537	0	0.0132359	0.0227528	0.0120635	0.00551444	GeneID:301269,Genbank:XM_017596753.1,RGD:1306718	adhesion G protein-coupled receptor F2	GO:0016021,GO:0004930,GO:0007166,GO:0007186	integral component of membrane|G-protein coupled receptor activity|cell surface receptor signaling pathway|G-protein coupled receptor signaling pathway
Adgrf3	0	0.0106658	0.0204538	0.00829511	0	0.0384212	0.00983816	0.0564099	0.0125581	0	0.0228916	0.00523206	GeneID:298857,Genbank:XM_006239800.3,RGD:1305868	adhesion G protein-coupled receptor F3	GO:0016021,GO:0004930,GO:0007166,GO:0007186	integral component of membrane|G-protein coupled receptor activity|cell surface receptor signaling pathway|G-protein coupled receptor signaling pathway
Adgrf4	1.22751	1.16492	0.682183	0.845186	0.624592	0.687189	4.0529	1.55947	6.27192	3.34681	4.13626	0.866755	GeneID:501106,Genbank:XM_006244640.2,RGD:1565216	adhesion G protein-coupled receptor F4	GO:0016021,GO:0004930,GO:0007166,GO:0007186	integral component of membrane|G-protein coupled receptor activity|cell surface receptor signaling pathway|G-protein coupled receptor signaling pathway
Adgrf5	21.2313	19.1572	17.9262	12.1578	10.3911	9.73798	9.08723	13.2443	12.9457	15.9321	14.5133	17.2652	GeneID:245977,Genbank:XM_008766833.2,RGD:621679	adhesion G protein-coupled receptor F5	GO:0043129,GO:0006112,GO:0007166,GO:0045177,GO:0007186,GO:0009986,GO:0016021,GO:0019216,GO:0031410,GO:0045444,GO:0042593,GO:0071073,GO:0004930,GO:0043031,GO:0005886	surfactant homeostasis|energy reserve metabolic process|cell surface receptor signaling pathway|apical part of cell|G-protein coupled receptor signaling pathway|cell surface|integral component of membrane|regulation of lipid metabolic process|cytoplasmic vesicle|fat cell differentiation|glucose homeostasis|positive regulation of phospholipid biosynthetic process|G-protein coupled receptor activit…
Adgrg1	14.5697	14.5037	13.8434	13.418	12.6831	13.9171	17.8905	13.6325	16.2341	15.6664	17.2897	18.4123	GeneID:260326,Genbank:NM_152242.2,RGD:628617	adhesion G protein-coupled receptor G1	GO:0005622,GO:0005886,GO:0007155,GO:0007166,GO:0007186,GO:0016021,GO:0007266,GO:0016477,GO:0021796,GO:0021801,GO:0070528,GO:0021819,GO:0072520,GO:0097451,GO:0001525,GO:2000179,GO:0004930,GO:0005518,GO:0007420,GO:0008201,GO:0008285,GO:0035025,GO:0010573,GO:0045121,GO:0045785,GO:2001223,GO:0050840	intracellular|plasma membrane|cell adhesion|cell surface receptor signaling pathway|G-protein coupled receptor signaling pathway|integral component of membrane|Rho protein signal transduction|cell migration|cerebral cortex regionalization|cerebral cortex radial glia guided migration|protein kinase C signaling|layer formation in cerebral cortex|seminiferous tubule development|glial limiting end-fo…
Adgrg2	1.45192	1.18896	1.23029	1.20595	1.9707	2.12365	0.329011	1.86402	1.04605	1.36367	1.72248	1.25397	GeneID:266735,Genbank:XM_017601927.1,RGD:628618	adhesion G protein-coupled receptor G2	GO:0005886,GO:0007166,GO:0007186,GO:0016021,GO:0016324,GO:0004930,GO:0005829	plasma membrane|cell surface receptor signaling pathway|G-protein coupled receptor signaling pathway|integral component of membrane|apical plasma membrane|G-protein coupled receptor activity|cytosol
Adgrg3	1.29499	1.19647	0.712751	0.922612	0.65834	0.902355	1.7705	0.911689	1.25888	0.834701	1.07088	1.05396	GeneID:291854,Genbank:XM_006255127.3,RGD:1305674	adhesion G protein-coupled receptor G3	GO:0007186,GO:0016021,GO:0030183,GO:0030334,GO:0032792,GO:1901223,GO:0004930,GO:0005886,GO:0007166	G-protein coupled receptor signaling pathway|integral component of membrane|B cell differentiation|regulation of cell migration|negative regulation of CREB transcription factor activity|negative regulation of NIK/NF-kappaB signaling|G-protein coupled receptor activity|plasma membrane|cell surface receptor signaling pathway
Adgrg5	0.818874	0.766033	0.515721	2.80137	2.63101	2.5892	6.87047	5.22131	4.91272	0.56905	0.314829	0.759543	GeneID:307645,Genbank:NM_001107410.1,RGD:1305559	adhesion G protein-coupled receptor G5	GO:0016021,GO:0004930,GO:0007166,GO:0007186	integral component of membrane|G-protein coupled receptor activity|cell surface receptor signaling pathway|G-protein coupled receptor signaling pathway
Adgrg6	15.795	13.4863	16.0868	12.7971	9.95801	10.7892	27.627	13.7435	18.2021	10.7816	16.0446	15.7992	GeneID:308376,Genbank:XM_218313.9,RGD:1308551	adhesion G protein-coupled receptor G6	GO:0007005,GO:0007166,GO:0007189,GO:0014037,GO:0016021,GO:0019933,GO:0022011,GO:0042552,GO:0043236,GO:0060347,GO:0004930,GO:0005622,GO:0005886	mitochondrion organization|cell surface receptor signaling pathway|adenylate cyclase-activating G-protein coupled receptor signaling pathway|Schwann cell differentiation|integral component of membrane|cAMP-mediated signaling|myelination in peripheral nervous system|myelination|laminin binding|heart trabecula formation|G-protein coupled receptor activity|intracellular|plasma membrane
Adgrg7	0	0	0	0	0	0	0	0	0	0	0	0	GeneID:304014,Genbank:XM_003751038.4,RGD:1307217	adhesion G protein-coupled receptor G7	GO:0016021,GO:0004930,GO:0007166,GO:0007186	integral component of membrane|G-protein coupled receptor activity|cell surface receptor signaling pathway|G-protein coupled receptor signaling pathway
Adgrl1	22.9591	22.1766	21.2558	11.1431	12.4446	11.5618	8.12091	13.9472	14.344	17.9464	15.8718	16.919	GeneID:65096,Genbank:NM_022962.1,RGD:620768	adhesion G protein-coupled receptor L1	GO:0051965,GO:0030424,GO:0005622,GO:0030426,GO:0005886,GO:0090129,GO:0007157,GO:0007166,GO:0007186,GO:0007420,GO:0014069,GO:0035584,GO:0015643,GO:0042734,GO:0016021,GO:0016079,GO:0043005,GO:0016524,GO:0004930,GO:0045202,GO:0030054,GO:0050839,GO:0030246,GO:0005515	positive regulation of synapse assembly|axon|intracellular|growth cone|plasma membrane|positive regulation of synapse maturation|heterophilic cell-cell adhesion via plasma membrane cell adhesion molecules|cell surface receptor signaling pathway|G-protein coupled receptor signaling pathway|brain development|postsynaptic density|calcium-mediated signaling using intracellular calcium source|toxic su…
Adgrl2	12.7911	12.0061	11.4346	24.3197	24.6457	34.8471	14.1683	28.3099	21.7064	15.6264	17.2424	15.1531	GeneID:171447,Genbank:NM_001302210.1,RGD:620835	adhesion G protein-coupled receptor L2	GO:0007186,GO:0007420,GO:0016021,GO:0030165,GO:0030246,GO:0043005,GO:0051965,GO:0004930,GO:0007166	G-protein coupled receptor signaling pathway|brain development|integral component of membrane|PDZ domain binding|carbohydrate binding|neuron projection|positive regulation of synapse assembly|G-protein coupled receptor activity|cell surface receptor signaling pathway
Adgrl3	1.2041	1.48277	1.01125	1.1559	0.967506	1.48705	1.60529	1.31229	1.42892	0.847151	0.756382	0.571989	GeneID:170641,Genbank:XM_008769984.2,RGD:620836	adhesion G protein-coupled receptor L3	GO:0098742,GO:0030424,GO:0007186,GO:0004930,GO:0031987,GO:0007416,GO:0005509,GO:0042220,GO:0005575,GO:0005887,GO:0007420,GO:0051965,GO:0016021,GO:0005911,GO:0030246,GO:0001764,GO:0007166	cell-cell adhesion via plasma-membrane adhesion molecules|axon|G-protein coupled receptor signaling pathway|G-protein coupled receptor activity|locomotion involved in locomotory behavior|synapse assembly|calcium ion binding|response to cocaine|cellular_component|integral component of plasma membrane|brain development|positive regulation of synapse assembly|integral component of membrane|cell-cell…
Adgrl4	12.8259	12.8979	10.9292	23.7252	13.1398	14.1193	8.93069	18.2493	13.7272	9.33656	8.7379	8.88354	GeneID:64124,Genbank:NM_022294.1,RGD:621136	adhesion G protein-coupled receptor L4	GO:0007166,GO:0007186,GO:0016021,GO:0031410,GO:0046983,GO:0004930,GO:0005509,GO:0005886	cell surface receptor signaling pathway|G-protein coupled receptor signaling pathway|integral component of membrane|cytoplasmic vesicle|protein dimerization activity|G-protein coupled receptor activity|calcium ion binding|plasma membrane
Adgrv1	0.156543	0.08336	0.0717017	0.0476703	0.0161542	0.0353278	0.0723684	0.0287127	0.0750558	0.0781575	0.064461	0.0865945	GeneID:100362255,Genbank:XM_017591161.1,RGD:1562101	adhesion G protein-coupled receptor V1	GO:0050910,GO:0032420,GO:0005509,GO:0050953,GO:0043235,GO:0005737,GO:0060122,GO:0045184,GO:0005886,GO:0071277,GO:0007166,GO:0007186,GO:0007601,GO:0007605,GO:0045202,GO:0009986,GO:1990075,GO:0045494,GO:0010739,GO:1990696,GO:0048471,GO:0016021,GO:0048496,GO:0017022,GO:0002141,GO:0048839,GO:0032391,GO:0002142,GO:0050877,GO:0004930	detection of mechanical stimulus involved in sensory perception of sound|stereocilium|calcium ion binding|sensory perception of light stimulus|receptor complex|cytoplasm|inner ear receptor cell stereocilium organization|establishment of protein localization|plasma membrane|cellular response to calcium ion|cell surface receptor signaling pathway|G-protein coupled receptor signaling pathway|visual …
Adh1	35.8883	39.3619	33.7189	10.0075	12.1446	11.5641	12.508	14.6033	19.7929	14.9092	14.4232	22.6347	GeneID:24172,Genbank:NM_019286.4,RGD:2044	alcohol dehydrogenase 1 (class I)	GO:0042803,GO:0008270,GO:0004022,GO:0046186,GO:0016491,GO:0004024,GO:0048149,GO:0031100,GO:0004745,GO:0048545,GO:0005622,GO:0005654,GO:0005739,GO:0005829,GO:0032526,GO:0051287,GO:0032570,GO:0005886,GO:0055114,GO:0033574,GO:0006068,GO:0035276,GO:0006069,GO:0001523,GO:0042572,GO:0042573,GO:0008144	protein homodimerization activity|zinc ion binding|alcohol dehydrogenase (NAD) activity|acetaldehyde biosynthetic process|oxidoreductase activity|alcohol dehydrogenase activity, zinc-dependent|behavioral response to ethanol|animal organ regeneration|retinol dehydrogenase activity|response to steroid hormone|intracellular|nucleoplasm|mitochondrion|cytosol|response to retinoic acid|NAD binding|resp…	rno00010,rno00071,rno00350,rno00830,rno00980,rno00982,rno05204	Glycolysis / Gluconeogenesis|Fatty acid degradation|Tyrosine metabolism|Retinol metabolism|Metabolism of xenobiotics by cytochrome P450|Drug metabolism - cytochrome P450|Chemical carcinogenesis
Adh4	0.302014	0.234436	0.12104	0.0280504	0.0445572	0.0259847	0.0499025	0.136252	0.169864	0.20075	0.193523	0.442313	GeneID:29646,Genbank:NM_017270.2,RGD:71028	alcohol dehydrogenase 4 (class II), pi polypeptide	GO:0035276,GO:0006069,GO:0004022,GO:0042572,GO:0006081,GO:0004024,GO:0042698,GO:0007568,GO:0046164,GO:0004032,GO:0004745,GO:0005503,GO:0005634,GO:0008270,GO:0005737,GO:0051287,GO:0005829,GO:0016620,GO:0006066,GO:0051903,GO:0019115,GO:0006067,GO:0001523,GO:1901661,GO:0019841,GO:0003960	ethanol binding|ethanol oxidation|alcohol dehydrogenase (NAD) activity|retinol metabolic process|cellular aldehyde metabolic process|alcohol dehydrogenase activity, zinc-dependent|ovulation cycle|aging|alcohol catabolic process|alditol:NADP+ 1-oxidoreductase activity|retinol dehydrogenase activity|all-trans retinal binding|nucleus|zinc ion binding|cytoplasm|NAD binding|cytosol|oxidoreductase acti…	rno00010,rno00071,rno00350,rno00830,rno00980,rno00982,rno05204	Glycolysis / Gluconeogenesis|Fatty acid degradation|Tyrosine metabolism|Retinol metabolism|Metabolism of xenobiotics by cytochrome P450|Drug metabolism - cytochrome P450|Chemical carcinogenesis
Adh5	41.2835	41.0022	41.294	35.5577	30.3553	34.2013	38.1565	32.7091	43.9067	38.4051	38.9566	40.397	GeneID:100145871,Genbank:NM_001126120.1,RGD:2292706	alcohol dehydrogenase 5 (class III), chi polypeptide	GO:0042803,GO:0004022,GO:0045777,GO:0005504,GO:0046294,GO:0005634,GO:0005737,GO:0005739,GO:0006068,GO:0006069,GO:0051409,GO:0007568,GO:0051775,GO:0008270,GO:0051903,GO:0018119,GO:0001523,GO:0018467,GO:0003016,GO:0032496	protein homodimerization activity|alcohol dehydrogenase (NAD) activity|positive regulation of blood pressure|fatty acid binding|formaldehyde catabolic process|nucleus|cytoplasm|mitochondrion|ethanol catabolic process|ethanol oxidation|response to nitrosative stress|aging|response to redox state|zinc ion binding|S-(hydroxymethyl)glutathione dehydrogenase activity|peptidyl-cysteine S-nitrosylation|…	rno00010,rno00071,rno00350,rno00830,rno00980,rno00982,rno05204	Glycolysis / Gluconeogenesis|Fatty acid degradation|Tyrosine metabolism|Retinol metabolism|Metabolism of xenobiotics by cytochrome P450|Drug metabolism - cytochrome P450|Chemical carcinogenesis
Adh6	0.025857	0.0123516	0.00394776	0	0.00339091	0	0	0	0	0	0.00883654	0.00403933	GeneID:310903,Genbank:XM_006233374.1,RGD:1306313	alcohol dehydrogenase 6 (class V)	GO:0005575,GO:0005737,GO:0006069,GO:0008150,GO:0008270,GO:0016491,GO:0045471,GO:0055114,GO:0003674,GO:0004022,GO:0004024	cellular_component|cytoplasm|ethanol oxidation|biological_process|zinc ion binding|oxidoreductase activity|response to ethanol|oxidation-reduction process|molecular_function|alcohol dehydrogenase (NAD) activity|alcohol dehydrogenase activity, zinc-dependent	rno00010,rno00071,rno00350,rno00830,rno00980,rno00982,rno05204	Glycolysis / Gluconeogenesis|Fatty acid degradation|Tyrosine metabolism|Retinol metabolism|Metabolism of xenobiotics by cytochrome P450|Drug metabolism - cytochrome P450|Chemical carcinogenesis
Adh6a	0.310869	0.419289	0.351781	0.203809	0.20144	0.251733	0.467327	0.211196	0.49368	0.10608	0.0562439	0.2571	GeneID:295498,Genbank:XM_006233371.3,RGD:1310029	alcohol dehydrogenase 6A (class V)	GO:0008270,GO:0016491,GO:0055114,GO:0003674,GO:0005575,GO:0008150	zinc ion binding|oxidoreductase activity|oxidation-reduction process|molecular_function|cellular_component|biological_process
Adh7	9.08354	6.63062	5.48055	22.8297	10.3263	36.6975	2.09764	22.8369	21.3112	5.83727	9.09777	8.82183	GeneID:171178,Genbank:XM_008761493.2,RGD:621638	alcohol dehydrogenase 7 (class IV), mu or sigma polypeptide	GO:0004745,GO:0005576,GO:0005622,GO:0005737,GO:0005829,GO:0019841,GO:0005886,GO:0006067,GO:0035276,GO:0042572,GO:0042573,GO:0001523,GO:0004022,GO:0004024,GO:0004031,GO:0006068,GO:0006069,GO:0008270,GO:0009617,GO:0042803,GO:0010430,GO:0045471,GO:0048019,GO:0051287,GO:0055114,GO:1900116	retinol dehydrogenase activity|extracellular region|intracellular|cytoplasm|cytosol|retinol binding|plasma membrane|ethanol metabolic process|ethanol binding|retinol metabolic process|retinoic acid metabolic process|retinoid metabolic process|alcohol dehydrogenase (NAD) activity|alcohol dehydrogenase activity, zinc-dependent|aldehyde oxidase activity|ethanol catabolic process|ethanol oxidation|zi…	rno00010,rno00071,rno00350,rno00830,rno00980,rno00982,rno05204	Glycolysis / Gluconeogenesis|Fatty acid degradation|Tyrosine metabolism|Retinol metabolism|Metabolism of xenobiotics by cytochrome P450|Drug metabolism - cytochrome P450|Chemical carcinogenesis
Adhfe1	0.318219	0.509967	0.536	0.198308	0.169619	0.402737	0.352796	0.26675	0.3926	0.426765	0.410445	0.567675	GeneID:362474,Genbank:XM_008763508.2,RGD:1308863	alcohol dehydrogenase, iron containing, 1	GO:0005739,GO:0005829,GO:0006539,GO:0008150,GO:0046872,GO:0047988,GO:0055114,GO:0003674,GO:0004022,GO:0005575	mitochondrion|cytosol|glutamate catabolic process via 2-oxoglutarate|biological_process|metal ion binding|hydroxyacid-oxoacid transhydrogenase activity|oxidation-reduction process|molecular_function|alcohol dehydrogenase (NAD) activity|cellular_component
Adi1	20.6525	22.4322	18.989	12.7617	13.3941	12.9923	13.1153	11.2118	14.9003	19.3027	18.8037	16.2598	GeneID:298934,Genbank:NM_199097.1,RGD:727828	acireductone dioxygenase 1	GO:0005737,GO:0005886,GO:0006555,GO:0010309,GO:0016491,GO:0019509,GO:0046872,GO:0005634,GO:0055114	cytoplasm|plasma membrane|methionine metabolic process|acireductone dioxygenase [iron(II)-requiring] activity|oxidoreductase activity|L-methionine salvage from methylthioadenosine|metal ion binding|nucleus|oxidation-reduction process	rno00270	Cysteine and methionine metabolism
Adig	0	0	0	0	0.059768	0	0.0669381	0	0	0	0	0.071197	GeneID:100361007,Genbank:XM_002729246.4,RGD:2320953	adipogenin	GO:0007283,GO:0016021,GO:0045600,GO:0050872,GO:0050873,GO:0005634,GO:0005737,GO:0005811	spermatogenesis|integral component of membrane|positive regulation of fat cell differentiation|white fat cell differentiation|brown fat cell differentiation|nucleus|cytoplasm|lipid droplet
Adipoq	2.03204	2.15168	8.01986	2.27736	0.359753	0.128211	3.1636	14.3746	1.06671	0.0163722	0.138889	5.98378	GeneID:246253,Genbank:NM_144744.3,RGD:628748	adiponectin, C1Q and collagen domain containing	GO:0050805,GO:0050873,GO:0005615,GO:0051260,GO:0005783,GO:0071944,GO:0051384,GO:0006006,GO:0072659,GO:0051899,GO:0060081,GO:0006635,GO:0090317,GO:0010739,GO:0007584,GO:1900121,GO:0010745,GO:0007623,GO:2000584,GO:1904706,GO:0010804,GO:2000590,GO:1904753,GO:0010875,GO:0031953,GO:0032270,GO:0010906,GO:0032720,GO:0032757,GO:0001666,GO:0034612,GO:0032869,GO:0001934,GO:0035690,GO:0005102,GO:0042493,GO:…	negative regulation of synaptic transmission|brown fat cell differentiation|extracellular space|protein homooligomerization|endoplasmic reticulum|cell periphery|response to glucocorticoid|glucose metabolic process|protein localization to plasma membrane|membrane depolarization|membrane hyperpolarization|fatty acid beta-oxidation|negative regulation of intracellular protein transport|positive regu…	rno04152,rno04920,rno03320,rno04211,rno04930,rno04932	AMPK signaling pathway|Adipocytokine signaling pathway|PPAR signaling pathway|Longevity regulating pathway - mammal|Type II diabetes mellitus|Non-alcoholic fatty liver disease (NAFLD)
Adipor1	110.874	112.55	116.661	113.804	117.621	133.202	129.279	119.356	140.736	137.535	148.259	134.11	GeneID:289036,Genbank:XM_006249852.3,RGD:1303151	adiponectin receptor 1	GO:0046982,GO:0033211,GO:0009755,GO:0055100,GO:0038023,GO:0010633,GO:0097003,GO:0010719,GO:1901223,GO:0010906,GO:0016021,GO:0019216,GO:0019395,GO:0042562,GO:0019901,GO:0042593,GO:0030308,GO:0042802,GO:0031226,GO:0046426,GO:0033210,GO:0005886,GO:0046427,GO:0046628	protein heterodimerization activity|adiponectin-activated signaling pathway|hormone-mediated signaling pathway|adiponectin binding|signaling receptor activity|negative regulation of epithelial cell migration|adipokinetic hormone receptor activity|negative regulation of epithelial to mesenchymal transition|negative regulation of NIK/NF-kappaB signaling|regulation of glucose metabolic process|integ…	rno04152,rno04920,rno04211,rno04932	AMPK signaling pathway|Adipocytokine signaling pathway|Longevity regulating pathway - mammal|Non-alcoholic fatty liver disease (NAFLD)
Adipor2	40.7887	37.8971	38.2398	37.5548	36.7764	35.6054	46.5786	37.0532	37.4929	40.1469	50.3392	42.0387	GeneID:312670,Genbank:XM_006237183.2,RGD:1307891	adiponectin receptor 2	GO:0046982,GO:0007565,GO:0055100,GO:0007584,GO:0061042,GO:0016021,GO:0030308,GO:0031226,GO:0033211,GO:0097003,GO:0038023,GO:0042562,GO:0042593,GO:0005886,GO:0042802,GO:0046326,GO:0007507	protein heterodimerization activity|female pregnancy|adiponectin binding|response to nutrient|vascular wound healing|integral component of membrane|negative regulation of cell growth|intrinsic component of plasma membrane|adiponectin-activated signaling pathway|adipokinetic hormone receptor activity|signaling receptor activity|hormone binding|glucose homeostasis|plasma membrane|identical protein …	rno04152,rno04920,rno04211,rno04932	AMPK signaling pathway|Adipocytokine signaling pathway|Longevity regulating pathway - mammal|Non-alcoholic fatty liver disease (NAFLD)
Adk	19.7549	23.2135	22.0323	15.7971	16.3101	15.3753	14.8009	12.6202	12.6245	17.4308	19.6547	14.9154	GeneID:25368,Genbank:NM_012895.3,RGD:2046	adenosine kinase	GO:0046872,GO:0019200,GO:0006166,GO:0004001,GO:0032922,GO:0005524,GO:0042102,GO:0006167,GO:0005634,GO:0005654,GO:0006169,GO:0005737,GO:0044209,GO:0006175,GO:0044342,GO:0005829,GO:0046085,GO:0010613,GO:0046835,GO:0016310	metal ion binding|carbohydrate kinase activity|purine ribonucleoside salvage|adenosine kinase activity|circadian regulation of gene expression|ATP binding|positive regulation of T cell proliferation|AMP biosynthetic process|nucleus|nucleoplasm|adenosine salvage|cytoplasm|AMP salvage|dATP biosynthetic process|type B pancreatic cell proliferation|cytosol|adenosine metabolic process|positive regulat…	rno00230	Purine metabolism
Adm	2.68741	4.50754	3.85502	3.44144	2.35935	3.71141	3.72371	3.38696	3.79091	3.61756	3.21592	3.36937	GeneID:25026,Genbank:XM_008759687.2,RGD:2047	adrenomedullin	GO:0005615,GO:0005737,GO:0007189,GO:0007204,GO:0007507,GO:0007565,GO:0007568,GO:0031623,GO:0008209,GO:0031700,GO:0008284,GO:0008285,GO:0032496,GO:0032868,GO:0035809,GO:0042475,GO:0097755,GO:0042594,GO:1990410,GO:0043065,GO:2001214,GO:0043116,GO:0001570,GO:0001666,GO:0001843,GO:0002026,GO:0002031,GO:0003073,GO:0005179,GO:0005515,GO:0009409,GO:0009611,GO:0010033,GO:0010460,GO:0010469,GO:0019933,GO:…	extracellular space|cytoplasm|adenylate cyclase-activating G-protein coupled receptor signaling pathway|positive regulation of cytosolic calcium ion concentration|heart development|female pregnancy|aging|receptor internalization|androgen metabolic process|adrenomedullin receptor binding|positive regulation of cell proliferation|negative regulation of cell proliferation|response to lipopolysacchar…	rno04270	Vascular smooth muscle contraction
Adm2	0	0	0	0.0182355	0	0.0337852	0.216277	0.0354309	0.0920237	0	0	0	GeneID:399475,Genbank:NM_201426.1,RGD:1302971	adrenomedullin 2	GO:0005622,GO:0006468,GO:0007189,GO:0007586,GO:0007631,GO:0010469,GO:0010628,GO:0044877,GO:0045766,GO:0045776,GO:0001525,GO:0005179,GO:0005576	intracellular|protein phosphorylation|adenylate cyclase-activating G-protein coupled receptor signaling pathway|digestion|feeding behavior|regulation of signaling receptor activity|positive regulation of gene expression|protein-containing complex binding|positive regulation of angiogenesis|negative regulation of blood pressure|angiogenesis|hormone activity|extracellular region
Adnp	48.615	49.634	52.9419	40.1046	38.4916	40.959	47.5968	40.1818	51.6442	51.1417	50.8416	50.5911	GeneID:64622,Genbank:NM_022681.2,RGD:71030	activity-dependent neuroprotector homeobox	GO:0043524,GO:0030425,GO:0005615,GO:0044849,GO:0030828,GO:0045773,GO:0031668,GO:0005634,GO:0048487,GO:0005737,GO:0006351,GO:0006355,GO:0007614,GO:0032091,GO:0009743,GO:0050731,GO:0032147,GO:0010035,GO:0050805,GO:0033484,GO:0010629,GO:0051965,GO:0042277,GO:0010835,GO:0003677,GO:0043025,GO:0010976,GO:0003682,GO:0030424,GO:0005507	negative regulation of neuron apoptotic process|dendrite|extracellular space|estrous cycle|positive regulation of cGMP biosynthetic process|positive regulation of axon extension|cellular response to extracellular stimulus|nucleus|beta-tubulin binding|cytoplasm|transcription, DNA-templated|regulation of transcription, DNA-templated|short-term memory|negative regulation of protein binding|response …
Adnp2	10.8901	11.8593	11.3768	9.4016	9.57861	9.12614	10.8704	9.29365	10.5412	10.2217	11.9827	10.5165	GeneID:307236,Genbank:NM_001127373.1,RGD:1308279	ADNP homeobox 2	GO:0034599,GO:0060548,GO:0071300,GO:0003677,GO:0030182,GO:0030307	cellular response to oxidative stress|negative regulation of cell death|cellular response to retinoic acid|DNA binding|neuron differentiation|positive regulation of cell growth
Ado	6.14315	6.13861	6.58199	6.93546	6.33677	7.41085	6.67612	6.73768	5.71382	4.99502	6.63203	6.14461	GeneID:309732,Genbank:NM_001107626.3,RGD:1308233	2-aminoethanethiol dioxygenase			rno00430	Taurine and hypotaurine metabolism
Adora1	0.125276	0.0854894	0.327886	0.305843	0.563272	0.35723	2.32624	0.904282	1.09381	0.285501	0.128438	0.27678	GeneID:29290,Genbank:XM_006249861.3,RGD:2048	adenosine A1 receptor	GO:0002674,GO:0002686,GO:0002793,GO:0003093,GO:0004629,GO:0005515,GO:0005783,GO:0030673,GO:0005886,GO:0031072,GO:0031683,GO:0006612,GO:0032229,GO:0032244,GO:0032279,GO:0045202,GO:0032795,GO:0045211,GO:0032900,GO:0045741,GO:0035307,GO:0045776,GO:0045777,GO:0045822,GO:0046888,GO:0000186,GO:0060087,GO:0046982,GO:0001609,GO:0070256,GO:0048167,GO:0097746,GO:0048786,GO:0001659,GO:0097756,GO:0001664,GO:…	negative regulation of acute inflammatory response|negative regulation of leukocyte migration|positive regulation of peptide secretion|regulation of glomerular filtration|phospholipase C activity|protein binding|endoplasmic reticulum|axolemma|plasma membrane|heat shock protein binding|G-protein beta/gamma-subunit complex binding|protein targeting to membrane|negative regulation of synaptic transm…	rno04071,rno04024,rno04022,rno04080,rno04923,rno04924,rno05032	Sphingolipid signaling pathway|cAMP signaling pathway|cGMP - PKG signaling pathway|Neuroactive ligand-receptor interaction|Regulation of lipolysis in adipocyte|Renin secretion|Morphine addiction
Adora2a	0.0906584	0.173226	0.169558	0.631513	0.514201	0.512206	1.2816	0.602597	0.515565	0.186261	0.16653	0.138084	GeneID:25369,Genbank:XM_017601552.1,RGD:2049	adenosine A2a receptor	GO:0005882,GO:0005886,GO:0005887,GO:0006355,GO:0006469,GO:0007186,GO:0016020,GO:0007189,GO:0019899,GO:0030424,GO:0007205,GO:0030425,GO:0030673,GO:0031000,GO:0031802,GO:0043025,GO:0032230,GO:0043116,GO:0032279,GO:0043154,GO:0035249,GO:0043279,GO:0043524,GO:0045211,GO:0045938,GO:0000139,GO:0051968,GO:0046636,GO:0001609,GO:0060079,GO:0046982,GO:0060080,GO:0048143,GO:0060134,GO:0001963,GO:0099055,GO:…	intermediate filament|plasma membrane|integral component of plasma membrane|regulation of transcription, DNA-templated|negative regulation of protein kinase activity|G-protein coupled receptor signaling pathway|membrane|adenylate cyclase-activating G-protein coupled receptor signaling pathway|enzyme binding|axon|protein kinase C-activating G-protein coupled receptor signaling pathway|dendrite|axo…	rno04015,rno04020,rno04024,rno04080,rno04270,rno05012,rno05034	Rap1 signaling pathway|Calcium signaling pathway|cAMP signaling pathway|Neuroactive ligand-receptor interaction|Vascular smooth muscle contraction|Parkinson's disease|Alcoholism
Adora2b	12.3441	11.728	14.4136	5.76931	3.97983	5.52322	5.90287	7.76578	7.01203	7.20319	4.90531	8.80263	GeneID:29316,Genbank:NM_017161.1,RGD:2050	adenosine A2B receptor	GO:0045765,GO:0032722,GO:0010575,GO:0002882,GO:0060087,GO:0010701,GO:0032755,GO:0010893,GO:0004930,GO:0097755,GO:0005622,GO:0005886,GO:0016021,GO:0007189,GO:0032966,GO:0030828,GO:0033605,GO:0031284,GO:0008284,GO:0043306,GO:0008285,GO:0001609,GO:0031668,GO:0009986,GO:0043950,GO:0001973	regulation of angiogenesis|positive regulation of chemokine production|positive regulation of vascular endothelial growth factor production|positive regulation of chronic inflammatory response to non-antigenic stimulus|relaxation of vascular smooth muscle|positive regulation of norepinephrine secretion|positive regulation of interleukin-6 production|positive regulation of steroid biosynthetic pro…	rno04015,rno04020,rno04080,rno04270,rno05034	Rap1 signaling pathway|Calcium signaling pathway|Neuroactive ligand-receptor interaction|Vascular smooth muscle contraction|Alcoholism
Adora3	0	0	0	0	0	0	0	0	0	0	0	0.00835758	GeneID:25370,Genbank:XM_006233067.3,RGD:2051	adenosine A3 receptor	GO:0032088,GO:0001973,GO:0042629,GO:0042734,GO:0002553,GO:0002687,GO:0005886,GO:0005887,GO:0043306,GO:0007186,GO:0050729,GO:0008285,GO:0050850,GO:0014061,GO:0070257,GO:0014068,GO:0001609,GO:0016021,GO:0030336	negative regulation of NF-kappaB transcription factor activity|adenosine receptor signaling pathway|mast cell granule|presynaptic membrane|histamine secretion by mast cell|positive regulation of leukocyte migration|plasma membrane|integral component of plasma membrane|positive regulation of mast cell degranulation|G-protein coupled receptor signaling pathway|positive regulation of inflammatory re…	rno04071,rno04022,rno04080	Sphingolipid signaling pathway|cGMP - PKG signaling pathway|Neuroactive ligand-receptor interaction
Adpgk	8.60802	9.87601	8.44873	13.4772	12.2991	10.0777	12.1744	10.5617	9.08501	8.27615	8.90409	9.62622	GeneID:315722,Genbank:XM_006243170.3,RGD:1306103	ADP-dependent glucokinase	GO:0043843,GO:0005783,GO:0006006,GO:0016310	ADP-specific glucokinase activity|endoplasmic reticulum|glucose metabolic process|phosphorylation	rno00010	Glycolysis / Gluconeogenesis
Adprh	11.3983	12.0807	11.4204	13.0397	12.4398	12.9093	13.7148	13.1327	12.0409	11.219	11.5736	11.146	GeneID:25371,Genbank:NM_183325.2,RGD:2052	ADP-ribosylarginine hydrolase	GO:0017137,GO:0003875,GO:0030955,GO:0005096,GO:0005622,GO:0006464,GO:0031338,GO:0051725,GO:0090630,GO:0006886,GO:0000287,GO:0012505	Rab GTPase binding|ADP-ribosylarginine hydrolase activity|potassium ion binding|GTPase activator activity|intracellular|cellular protein modification process|regulation of vesicle fusion|protein de-ADP-ribosylation|activation of GTPase activity|intracellular protein transport|magnesium ion binding|endomembrane system
Adprhl1	0.127949	0.0733436	0.119814	1.78941	3.62211	3.54817	0.0626411	2.27611	0.187639	0.109961	0.119518	0.19988	GeneID:290880,Genbank:XM_006253439.3,RGD:1305641	ADP-ribosylhydrolase like 1	GO:0005622,GO:0005769,GO:0006886,GO:0012505,GO:0017137,GO:0031338,GO:0051725,GO:0090630,GO:0000287,GO:0003875,GO:0005096	intracellular|early endosome|intracellular protein transport|endomembrane system|Rab GTPase binding|regulation of vesicle fusion|protein de-ADP-ribosylation|activation of GTPase activity|magnesium ion binding|ADP-ribosylarginine hydrolase activity|GTPase activator activity
Adprhl2	11.1241	10.8876	10.2596	12.0725	10.4179	11.558	14.4515	11.3573	12.0826	11.0914	11.4669	11.1067	GeneID:362600,Genbank:NM_001108680.1,RGD:1309068	ADP-ribosylhydrolase like 2	GO:0005737,GO:0005739,GO:0016604,GO:0016787,GO:0071451,GO:0005634,GO:0005654	cytoplasm|mitochondrion|nuclear body|hydrolase activity|cellular response to superoxide|nucleus|nucleoplasm
Adprm	9.76498	9.32922	9.51852	9.3689	7.62386	8.91388	13.1168	9.25228	10.8067	9.3862	8.98115	8.63741	GeneID:287406,Genbank:XM_006246603.3,RGD:1309906	ADP-ribose/CDP-alcohol diphosphatase, manganese-dependent	GO:0046872,GO:0047631,GO:0047734	metal ion binding|ADP-ribose diphosphatase activity|CDP-glycerol diphosphatase activity	rno00564,rno00230	Glycerophospholipid metabolism|Purine metabolism
Adra1a	2.08295	3.40346	3.01821	0.213349	0.352301	0.0971439	0.197282	0.168622	0.288322	0.856373	1.02286	0.807406	GeneID:29412,Genbank:XM_006252107.3,RGD:2055	adrenoceptor alpha 1A	GO:0004937,GO:0005575,GO:0005634,GO:0005737,GO:0005886,GO:0010460,GO:0005887,GO:0010507,GO:0005901,GO:0010613,GO:0007188,GO:0016020,GO:0030018,GO:0030315,GO:0045987,GO:0031965,GO:0032230,GO:0046982,GO:0060073,GO:0060402,GO:0001985,GO:0060452,GO:0001994,GO:0061049,GO:0070374,GO:0001996,GO:0001997,GO:0003084,GO:0004935,GO:0007200,GO:0007202,GO:0007204,GO:0007267,GO:0007512,GO:0035024,GO:0007568,GO:…	alpha1-adrenergic receptor activity|cellular_component|nucleus|cytoplasm|plasma membrane|positive regulation of heart rate|integral component of plasma membrane|negative regulation of autophagy|caveola|positive regulation of cardiac muscle hypertrophy|adenylate cyclase-modulating G-protein coupled receptor signaling pathway|membrane|Z disc|T-tubule|positive regulation of smooth muscle contraction…	rno04020,rno04022,rno04152,rno04080,rno04261,rno04270,rno04970	Calcium signaling pathway|cGMP - PKG signaling pathway|AMPK signaling pathway|Neuroactive ligand-receptor interaction|Adrenergic signaling in cardiomyocytes|Vascular smooth muscle contraction|Salivary secretion
Adra1b	0.302649	0.250591	0.323453	0.0524709	0.0555656	0	0.0266706	0.0728208	0.0302616	0.107292	0.227545	0.141838	GeneID:24173,Genbank:NM_016991.2,RGD:2054	adrenoceptor alpha 1B	GO:0004937,GO:0005515,GO:0005634,GO:0005737,GO:0008542,GO:0009725,GO:0005886,GO:0014704,GO:0016020,GO:0016021,GO:0019229,GO:0043627,GO:0030315,GO:0045818,GO:0031965,GO:0045819,GO:0045907,GO:0045987,GO:0046982,GO:0001974,GO:0001975,GO:0048148,GO:0001987,GO:0048545,GO:0001994,GO:0001996,GO:0001997,GO:0004935,GO:0005887,GO:0005901,GO:0007188,GO:0007200,GO:0007204,GO:0007267,GO:0007512,GO:0035024,GO:…	alpha1-adrenergic receptor activity|protein binding|nucleus|cytoplasm|visual learning|response to hormone|plasma membrane|intercalated disc|membrane|integral component of membrane|regulation of vasoconstriction|response to estrogen|T-tubule|negative regulation of glycogen catabolic process|nuclear membrane|positive regulation of glycogen catabolic process|positive regulation of vasoconstriction|p…	rno04020,rno04022,rno04080,rno04261,rno04270,rno04970	Calcium signaling pathway|cGMP - PKG signaling pathway|Neuroactive ligand-receptor interaction|Adrenergic signaling in cardiomyocytes|Vascular smooth muscle contraction|Salivary secretion
Adra1d	1.24748	1.12651	1.57327	7.65653	6.64246	10.2274	1.05416	6.81526	2.76809	2.49485	2.33894	2.9232	GeneID:29413,Genbank:NM_024483.1,RGD:62064	adrenoceptor alpha 1D	GO:0005829,GO:0005886,GO:0005887,GO:0007188,GO:0007194,GO:0007195,GO:0007200,GO:0048148,GO:0007204,GO:0048149,GO:0007267,GO:0051481,GO:0007568,GO:0051482,GO:0051967,GO:0060073,GO:0060158,GO:0071875,GO:0071880,GO:1901386,GO:0001591,GO:0001963,GO:0001986,GO:0001994,GO:0004935,GO:0004937,GO:0007610,GO:0009636,GO:0014059,GO:0016021,GO:0030672,GO:0035240,GO:0042493,GO:0043266,GO:0045907,GO:0045987	cytosol|plasma membrane|integral component of plasma membrane|adenylate cyclase-modulating G-protein coupled receptor signaling pathway|negative regulation of adenylate cyclase activity|adenylate cyclase-inhibiting dopamine receptor signaling pathway|phospholipase C-activating G-protein coupled receptor signaling pathway|behavioral response to cocaine|positive regulation of cytosolic calcium ion …	rno04020,rno04022,rno04080,rno04261,rno04270,rno04970	Calcium signaling pathway|cGMP - PKG signaling pathway|Neuroactive ligand-receptor interaction|Adrenergic signaling in cardiomyocytes|Vascular smooth muscle contraction|Salivary secretion
Adra2a	2.14856	2.34469	1.99292	1.98385	2.29184	1.23136	1.60028	2.77735	2.43372	1.75572	2.02767	1.82006	GeneID:25083,Genbank:NM_012739.3,RGD:2056	adrenoceptor alpha 2A	GO:0005737,GO:0005886,GO:0005887,GO:0006260,GO:0030335,GO:0006940,GO:0031696,GO:0007165,GO:0007186,GO:0031996,GO:0032147,GO:0032148,GO:0043235,GO:0032795,GO:0043406,GO:0043410,GO:0045202,GO:0045741,GO:0001819,GO:0061179,GO:0045955,GO:0046676,GO:0002526,GO:0046982,GO:0004935,GO:0070473,GO:0071875,GO:0004938,GO:0071880,GO:0071881,GO:0071882,GO:0007188,GO:0007267,GO:0007565,GO:0007610,GO:0019229,GO:…	cytoplasm|plasma membrane|integral component of plasma membrane|DNA replication|positive regulation of cell migration|regulation of smooth muscle contraction|alpha-2C adrenergic receptor binding|signal transduction|G-protein coupled receptor signaling pathway|thioesterase binding|activation of protein kinase activity|activation of protein kinase B activity|receptor complex|heterotrimeric G-protei…	rno04022,rno04080	cGMP - PKG signaling pathway|Neuroactive ligand-receptor interaction
Adra2b	0.111996	0.0475547	0.0341983	0.503916	0.303536	0.299784	0.0657968	0.130246	0.0793219	0.0962509	0.0956855	0.0641512	GeneID:24174,Genbank:NM_138505.2,RGD:2057	adrenoceptor alpha 2B	GO:0071880,GO:0030168,GO:0003056,GO:0032148,GO:0004935,GO:0035625,GO:0004938,GO:0005622,GO:0005887,GO:0043410,GO:0007186,GO:0045666,GO:0007188,GO:0045777,GO:0007267,GO:0051379,GO:0007565,GO:0000165,GO:0070474,GO:0007610,GO:0000187,GO:0071875,GO:0016021,GO:0001525	adenylate cyclase-activating adrenergic receptor signaling pathway|platelet activation|regulation of vascular smooth muscle contraction|activation of protein kinase B activity|adrenergic receptor activity|epidermal growth factor-activated receptor transactivation by G-protein coupled receptor signaling pathway|alpha2-adrenergic receptor activity|intracellular|integral component of plasma membrane…	rno04022,rno04080	cGMP - PKG signaling pathway|Neuroactive ligand-receptor interaction
Adra2c	0.147772	0.183531	0.0406105	0.0109798	0	0.0508563	0	0.0213334	0.0110817	0.528628	0.303004	0.193912	GeneID:24175,Genbank:NM_138506.1,RGD:2058	adrenoceptor alpha 2C	GO:0070473,GO:0035625,GO:0004938,GO:0071875,GO:0042803,GO:0005737,GO:0071880,GO:0043410,GO:0005887,GO:0007186,GO:0007188,GO:0007267,GO:0043679,GO:0007565,GO:0045666,GO:0007610,GO:0045907,GO:0030168,GO:0046982,GO:0030424,GO:0004930,GO:0051379,GO:0031694,GO:0004935,GO:0051930,GO:0032148	negative regulation of uterine smooth muscle contraction|epidermal growth factor-activated receptor transactivation by G-protein coupled receptor signaling pathway|alpha2-adrenergic receptor activity|adrenergic receptor signaling pathway|protein homodimerization activity|cytoplasm|adenylate cyclase-activating adrenergic receptor signaling pathway|positive regulation of MAPK cascade|integral compo…	rno04022,rno04080	cGMP - PKG signaling pathway|Neuroactive ligand-receptor interaction
Adrb1	3.99004	2.00902	3.07886	1.28203	1.99404	1.78143	1.90064	1.05086	2.42612	2.10264	2.5429	3.55459	GeneID:24925,Genbank:NM_012701.1,RGD:2059	adrenoceptor beta 1	GO:0002025,GO:0003061,GO:0003084,GO:0004935,GO:0004940,GO:0005769,GO:0005886,GO:0005057,GO:0005887,GO:0005980,GO:0006915,GO:0016020,GO:0007186,GO:0016021,GO:0007188,GO:0019233,GO:0007189,GO:0030165,GO:0030819,GO:0001659,GO:0043231,GO:0031649,GO:0001996,GO:0043547,GO:0031694,GO:0001997,GO:0043950,GO:0002024,GO:0060080,GO:0045762,GO:0061051,GO:0045986,GO:0071880,GO:0046878,GO:0086004,GO:0098794,GO:…	norepinephrine-epinephrine-mediated vasodilation involved in regulation of systemic arterial blood pressure|positive regulation of the force of heart contraction by norepinephrine|positive regulation of systemic arterial blood pressure|adrenergic receptor activity|beta1-adrenergic receptor activity|early endosome|plasma membrane|signal transducer activity, downstream of receptor|integral componen…	rno04020,rno04024,rno04022,rno04080,rno04540,rno04923,rno04924,rno04261,rno04970,rno05414	Calcium signaling pathway|cAMP signaling pathway|cGMP - PKG signaling pathway|Neuroactive ligand-receptor interaction|Gap junction|Regulation of lipolysis in adipocyte|Renin secretion|Adrenergic signaling in cardiomyocytes|Salivary secretion|Dilated cardiomyopathy (DCM)
Adrb2	4.95473	4.54522	4.84369	2.68327	2.76394	3.9618	1.88989	3.30959	3.32745	3.84904	4.5238	3.16539	GeneID:24176,Genbank:NM_012492.2,RGD:2060	adrenoceptor beta 2	GO:0045944,GO:0045986,GO:0002025,GO:0048633,GO:0050728,GO:0002028,GO:0061885,GO:0050873,GO:0071456,GO:0002032,GO:0071548,GO:0051379,GO:0071867,GO:0005769,GO:0002086,GO:0071875,GO:0005886,GO:0003059,GO:0004935,GO:0071880,GO:0005887,GO:1904646,GO:0071902,GO:2000969,GO:0090331,GO:0005901,GO:0007610,GO:0008144,GO:0006898,GO:0008179,GO:0008284,GO:0008306,GO:0009409,GO:0001540,GO:0030279,GO:0030424,GO:…	positive regulation of transcription by RNA polymerase II|negative regulation of smooth muscle contraction|norepinephrine-epinephrine-mediated vasodilation involved in regulation of systemic arterial blood pressure|positive regulation of skeletal muscle tissue growth|negative regulation of inflammatory response|regulation of sodium ion transport|positive regulation of mini excitatory postsynaptic…	rno04020,rno04024,rno04022,rno04080,rno04923,rno04924,rno04261,rno04970	Calcium signaling pathway|cAMP signaling pathway|cGMP - PKG signaling pathway|Neuroactive ligand-receptor interaction|Regulation of lipolysis in adipocyte|Renin secretion|Adrenergic signaling in cardiomyocytes|Salivary secretion
Adrb3	5.94511	5.92055	5.34349	0.145627	0.315776	0.154175	0.468802	0.363791	1.17583	3.78988	3.58821	2.41442	GeneID:25645,Genbank:XM_008771315.2,RGD:2061	adrenoceptor beta 3	GO:0005887,GO:0006898,GO:0007188,GO:0007189,GO:0007190,GO:0042803,GO:0007267,GO:0007568,GO:0043235,GO:0007610,GO:0043410,GO:0046677,GO:0050873,GO:0051379,GO:0001659,GO:0002024,GO:0002025,GO:0002032,GO:0004935,GO:0004939,GO:0005634,GO:0009409,GO:0015052,GO:0016020,GO:0031649,GO:0051380,GO:0031699,GO:0040015,GO:0042755,GO:0071880	integral component of plasma membrane|receptor-mediated endocytosis|adenylate cyclase-modulating G-protein coupled receptor signaling pathway|adenylate cyclase-activating G-protein coupled receptor signaling pathway|activation of adenylate cyclase activity|protein homodimerization activity|cell-cell signaling|aging|receptor complex|behavior|positive regulation of MAPK cascade|response to antibiot…	rno04020,rno04022,rno04080,rno04923,rno04924,rno04970,rno04714	Calcium signaling pathway|cGMP - PKG signaling pathway|Neuroactive ligand-receptor interaction|Regulation of lipolysis in adipocyte|Renin secretion|Salivary secretion|Thermogenesis
Adrm1	33.3156	31.6438	30.6482	37.1314	32.0473	35.8514	45.2955	36.3394	39.2323	33.4197	33.5607	33.4221	GeneID:65138,Genbank:NM_031708.1,RGD:69248	adhesion regulating molecule 1	GO:0061133,GO:0042699,GO:0002020,GO:0043130,GO:0005654,GO:0043248,GO:0070628,GO:0005829,GO:0005886,GO:0006368,GO:0048477,GO:0006511,GO:0072520,GO:0048538,GO:0007286,GO:0060009,GO:0008541,GO:0000502,GO:0060399,GO:0010950,GO:0060612,GO:0033081,GO:0001541	endopeptidase activator activity|follicle-stimulating hormone signaling pathway|protease binding|ubiquitin binding|nucleoplasm|proteasome assembly|proteasome binding|cytosol|plasma membrane|transcription elongation from RNA polymerase II promoter|oogenesis|ubiquitin-dependent protein catabolic process|seminiferous tubule development|thymus development|spermatid development|Sertoli cell developmen…	rno03050,rno05169	Proteasome|Epstein-Barr virus infection
Adsl	26.4446	26.805	24.8512	19.5818	18.4225	19.8268	28.1922	20.5505	23.7782	22.1005	25.6573	25.4517	GeneID:315150,Genbank:NM_001130503.1,RGD:1307617	adenylosuccinate lyase	GO:0014850,GO:0004018,GO:0042594,GO:0044208,GO:0005829,GO:0006163,GO:0006167,GO:0051262,GO:0006189,GO:0070626,GO:0007584,GO:0001666,GO:0009060,GO:0009156	response to muscle activity|N6-(1,2-dicarboxyethyl)AMP AMP-lyase (fumarate-forming) activity|response to starvation|'de novo' AMP biosynthetic process|cytosol|purine nucleotide metabolic process|AMP biosynthetic process|protein tetramerization|'de novo' IMP biosynthetic process|(S)-2-(5-amino-1-(5-phospho-D-ribosyl)imidazole-4-carboxamido)succinate AMP-lyase (fumarate-forming) activity|response t…	rno00230,rno00250	Purine metabolism|Alanine, aspartate and glutamate metabolism
Adss	42.3574	39.5955	42.8811	70.0266	56.6378	71.7028	82.6247	62.0735	64.9498	51.0785	49.0391	46.9991	GeneID:289276,Genbank:NM_001105975.1,RGD:1310508	adenylosuccinate synthase	GO:0046040,GO:0004019,GO:0005525,GO:0060359,GO:0005737,GO:0005829,GO:0005886,GO:0071257,GO:0006164,GO:0006167,GO:0006531,GO:0014074,GO:0000287,GO:0044208	IMP metabolic process|adenylosuccinate synthase activity|GTP binding|response to ammonium ion|cytoplasm|cytosol|plasma membrane|cellular response to electrical stimulus|purine nucleotide biosynthetic process|AMP biosynthetic process|aspartate metabolic process|response to purine-containing compound|magnesium ion binding|'de novo' AMP biosynthetic process	rno00230,rno00250	Purine metabolism|Alanine, aspartate and glutamate metabolism
Adssl1	2.97968	4.70442	4.0495	1.51756	2.05836	2.62866	2.26831	2.10035	2.81151	4.69326	5.26359	4.13032	GeneID:684425,Genbank:XM_003750237.3,RGD:1590342	adenylosuccinate synthase like 1	GO:0042803,GO:0004019,GO:0044208,GO:0005525,GO:0005737,GO:0006163,GO:0006167,GO:0046040,GO:0006531,GO:0006541,GO:0051015,GO:0009168,GO:0071257,GO:0014850,GO:0000287,GO:0035690,GO:0003924,GO:0042594	protein homodimerization activity|adenylosuccinate synthase activity|'de novo' AMP biosynthetic process|GTP binding|cytoplasm|purine nucleotide metabolic process|AMP biosynthetic process|IMP metabolic process|aspartate metabolic process|glutamine metabolic process|actin filament binding|purine ribonucleoside monophosphate biosynthetic process|cellular response to electrical stimulus|response to m…	rno00230,rno00250	Purine metabolism|Alanine, aspartate and glutamate metabolism
Adtrp	0.409105	0.449475	0.262336	0.227981	0.482854	0.366066	0.18026	0.177183	0.536892	0.237324	0.524288	0.153383	GeneID:361228,Genbank:XM_006253833.3,RGD:1305679	androgen-dependent TFPI-regulating protein	GO:0071383,GO:0009986,GO:0010628,GO:0012505,GO:0016020,GO:0016021,GO:0016787,GO:0030195,GO:0042758,GO:0005901	cellular response to steroid hormone stimulus|cell surface|positive regulation of gene expression|endomembrane system|membrane|integral component of membrane|hydrolase activity|negative regulation of blood coagulation|long-chain fatty acid catabolic process|caveola
Aebp1	135.813	125.49	135.357	70.6346	79.0579	60.0302	59.647	76.746	117.928	157.485	157.956	124.044	GeneID:305494,Genbank:XM_006251316.3,RGD:1306922	AE binding protein 1	GO:0005615,GO:0000977,GO:0006351,GO:0001227,GO:0006355,GO:0003714,GO:0004180,GO:0004181,GO:0006508,GO:0006518,GO:0004185,GO:0008270,GO:0005516,GO:0016485,GO:0005576,GO:0000122,GO:0031012	extracellular space|RNA polymerase II regulatory region sequence-specific DNA binding|transcription, DNA-templated|transcriptional repressor activity, RNA polymerase II transcription regulatory region sequence-specific DNA binding|regulation of transcription, DNA-templated|transcription corepressor activity|carboxypeptidase activity|metallocarboxypeptidase activity|proteolysis|peptide metabolic p…
Aebp2	11.7439	10.8553	10.8358	9.77039	8.57087	9.41903	14.1313	9.74601	12.434	11.9946	11.7762	12.6767	GeneID:297705,Genbank:XM_017592596.1,RGD:1307233	AE binding protein 2	GO:0003677,GO:0003714,GO:0005634,GO:0006355,GO:0035098,GO:0000122,GO:0000978,GO:0001078	DNA binding|transcription corepressor activity|nucleus|regulation of transcription, DNA-templated|ESC/E(Z) complex|negative regulation of transcription by RNA polymerase II|RNA polymerase II proximal promoter sequence-specific DNA binding|transcriptional repressor activity, RNA polymerase II proximal promoter sequence-specific DNA binding
Aen	8.50058	8.13115	7.4072	7.59477	7.78167	6.82141	11.127	10.0945	6.85675	9.07066	8.53447	9.45433	GeneID:361594,Genbank:XM_006229399.3,RGD:1305051	apoptosis enhancing nuclease	GO:0005634,GO:0005654,GO:0005730,GO:0010212,GO:0031965,GO:0042771,GO:0003676,GO:0090305,GO:0004527	nucleus|nucleoplasm|nucleolus|response to ionizing radiation|nuclear membrane|intrinsic apoptotic signaling pathway in response to DNA damage by p53 class mediator|nucleic acid binding|nucleic acid phosphodiester bond hydrolysis|exonuclease activity
Aes	173.961	178.183	190.404	126.608	151.528	136.636	140.914	132.623	157.276	194.895	204.307	187.799	GeneID:29466,Genbank:NM_019220.1,RGD:2731	amino-terminal enhancer of split	GO:0090090,GO:0032091,GO:0001501,GO:2000210,GO:0040008,GO:0003714,GO:0005634,GO:0006351,GO:0045892,GO:0006357,GO:0060761,GO:0010629,GO:0016055,GO:0070555,GO:0031668,GO:0000122	negative regulation of canonical Wnt signaling pathway|negative regulation of protein binding|skeletal system development|positive regulation of anoikis|regulation of growth|transcription corepressor activity|nucleus|transcription, DNA-templated|negative regulation of transcription, DNA-templated|regulation of transcription by RNA polymerase II|negative regulation of response to cytokine stimulus…
Afap1	31.3083	30.5631	29.8868	18.451	25.5422	19.4079	18.6841	23.2595	23.0386	31.1213	31.343	27.4139	GeneID:140935,Genbank:XM_008770246.2,RGD:619959	actin filament associated protein 1	GO:0071260,GO:0005829,GO:0005884,GO:0005925,GO:0007165,GO:0009966,GO:0015629,GO:0017124,GO:0003779,GO:0042169,GO:0005515,GO:0051493,GO:0005737	cellular response to mechanical stimulus|cytosol|actin filament|focal adhesion|signal transduction|regulation of signal transduction|actin cytoskeleton|SH3 domain binding|actin binding|SH2 domain binding|protein binding|regulation of cytoskeleton organization|cytoplasm
Afap1l1	1.93167	2.42029	1.92908	2.47841	1.78156	1.71829	2.17202	2.71632	2.71118	1.52574	1.83975	1.39009	GeneID:291565,Genbank:XM_006254794.3,RGD:1311580	actin filament associated protein 1-like 1	GO:0071437,GO:0002102,GO:0005737,GO:0030054	invadopodium|podosome|cytoplasm|cell junction
Afap1l2	6.9822	6.87851	6.33546	5.2969	3.98644	4.89706	4.48135	3.69804	4.22151	3.1924	3.71502	3.61809	GeneID:292130,Genbank:XM_008760580.2,RGD:1310668	actin filament associated protein 1-like 2	GO:0005886,GO:0006954,GO:0007346,GO:0017124,GO:0030296,GO:0032675,GO:0032757,GO:0035591,GO:0042169,GO:0045742,GO:0005737,GO:0045893,GO:0005829,GO:0061098	plasma membrane|inflammatory response|regulation of mitotic cell cycle|SH3 domain binding|protein tyrosine kinase activator activity|regulation of interleukin-6 production|positive regulation of interleukin-8 production|signaling adaptor activity|SH2 domain binding|positive regulation of epidermal growth factor receptor signaling pathway|cytoplasm|positive regulation of transcription, DNA-templat…
Afdn	24.2992	23.6457	24.6272	16.4515	17.864	15.3283	19.1296	17.8756	17.6605	24.1274	29.2306	29.8876	GeneID:26955,Genbank:NM_013217.2,RGD:708561	afadin, adherens junction formation factor	GO:0005913,GO:0007155,GO:0007165,GO:0016607,GO:0045177,GO:0017016,GO:0021537,GO:0045296,GO:0021987,GO:0048854,GO:0048872,GO:0050839,GO:0005515,GO:0005654,GO:0005737,GO:0005829,GO:0005886,GO:0005911,GO:0005912,GO:0030054,GO:0030274,GO:0032880,GO:0034332,GO:0034334,GO:0060019,GO:0043296,GO:0060563,GO:0043547,GO:0070445,GO:0090557,GO:1902414	cell-cell adherens junction|cell adhesion|signal transduction|nuclear speck|apical part of cell|Ras GTPase binding|telencephalon development|cadherin binding|cerebral cortex development|brain morphogenesis|homeostasis of number of cells|cell adhesion molecule binding|protein binding|nucleoplasm|cytoplasm|cytosol|plasma membrane|cell-cell junction|adherens junction|cell junction|LIM domain binding…	rno04014,rno04015,rno04024,rno04520,rno04530,rno04670	Ras signaling pathway|Rap1 signaling pathway|cAMP signaling pathway|Adherens junction|Tight junction|Leukocyte transendothelial migration
Aff1	34.3777	33.0073	35.3343	27.229	27.1691	28.7677	35.3962	26.8609	28.8638	33.2433	33.0836	35.5272	GeneID:305152,Genbank:XM_006250632.3,RGD:1307940	AF4/FMR2 family, member 1	GO:0005575,GO:0005634,GO:0008023,GO:0008150,GO:0032783,GO:0045893,GO:0003674,GO:0003690,GO:0003700	cellular_component|nucleus|transcription elongation factor complex|biological_process|ELL-EAF complex|positive regulation of transcription, DNA-templated|molecular_function|double-stranded DNA binding|DNA binding transcription factor activity	rno05202	Transcriptional misregulation in cancers
Aff2	6.44879	6.34492	4.36875	1.08428	1.60752	1.18395	1.26683	0.914407	1.90695	1.90621	2.35559	1.98767	GeneID:293922,Genbank:XM_006229539.2,RGD:1565592	AF4/FMR2 family, member 2	GO:0016607,GO:0003690,GO:0032783,GO:0003700,GO:0005575,GO:0005634,GO:0007611,GO:0035063,GO:0008023,GO:0043484,GO:0008150,GO:0002151,GO:0010468,GO:0010629,GO:0003674	nuclear speck|double-stranded DNA binding|ELL-EAF complex|DNA binding transcription factor activity|cellular_component|nucleus|learning or memory|nuclear speck organization|transcription elongation factor complex|regulation of RNA splicing|biological_process|G-quadruplex RNA binding|regulation of gene expression|negative regulation of gene expression|molecular_function
Aff3	1.96299	2.70325	2.74219	1.92364	2.15771	1.94318	0.857429	2.19766	1.84729	2.04611	1.9536	1.6743	GeneID:363220,Genbank:XM_017596512.1,RGD:1308527	AF4/FMR2 family, member 3	GO:0005634,GO:0005654,GO:0005829,GO:0008023,GO:0016604,GO:0032783,GO:0034612,GO:0035116,GO:0003690,GO:0003700	nucleus|nucleoplasm|cytosol|transcription elongation factor complex|nuclear body|ELL-EAF complex|response to tumor necrosis factor|embryonic hindlimb morphogenesis|double-stranded DNA binding|DNA binding transcription factor activity
Aff4	31.657	31.7952	30.9978	28.3483	28.1118	28.3108	33.8538	29.7875	32.0766	32.4545	32.8186	32.9869	GeneID:303132,Genbank:XM_006246263.3,RGD:1311694	AF4/FMR2 family, member 4	GO:0003690,GO:0003700,GO:0005575,GO:0005634,GO:0007286,GO:0008023,GO:0008150,GO:0032783,GO:0035327,GO:0001650,GO:0003674	double-stranded DNA binding|DNA binding transcription factor activity|cellular_component|nucleus|spermatid development|transcription elongation factor complex|biological_process|ELL-EAF complex|transcriptionally active chromatin|fibrillar center|molecular_function
Afg3l1	22.6161	26.055	23.3616	22.0197	23.0414	24.7449	19.62	24.0557	22.8424	28.0692	29.5585	25.5152	GeneID:361436,Genbank:NM_001108456.3,RGD:1309722	AFG3(ATPase family gene 3)-like 1 (S. cerevisiae)	GO:0005745,GO:0008053,GO:0008270,GO:0021675,GO:0034982,GO:0042407,GO:0004222,GO:0005524,GO:0005743	m-AAA complex|mitochondrial fusion|zinc ion binding|nerve development|mitochondrial protein processing|cristae formation|metalloendopeptidase activity|ATP binding|mitochondrial inner membrane
Afg3l2	18.8239	18.0073	17.7241	17.5289	16.1328	18.1945	25.3445	19.6484	22.6919	20.5123	20.1388	20.4616	GeneID:307350,Genbank:NM_001134864.1,RGD:1305259	AFG3 like matrix AAA peptidase subunit 2	GO:0042407,GO:0008270,GO:0005739,GO:0016485,GO:0042552,GO:0016540,GO:0005743,GO:0048747,GO:0005745,GO:0006508,GO:0007005,GO:0021675,GO:0007409,GO:0051560,GO:0007528,GO:0060013,GO:0034982,GO:0008053,GO:0003674,GO:0036444,GO:0008150,GO:0004222,GO:0040014,GO:0008237,GO:0005524	cristae formation|zinc ion binding|mitochondrion|protein processing|myelination|protein autoprocessing|mitochondrial inner membrane|muscle fiber development|m-AAA complex|proteolysis|mitochondrion organization|nerve development|axonogenesis|mitochondrial calcium ion homeostasis|neuromuscular junction development|righting reflex|mitochondrial protein processing|mitochondrial fusion|molecular_funct…
Afm	0	0	0.0342068	0.184969	0.0783513	0.0257021	0.0877508	0.125786	0.0373372	0.0240687	0.0893286	0.0116667	GeneID:282708,Genbank:XM_008770001.2,RGD:628614	afamin	GO:0008431,GO:0050821,GO:0051180,GO:0071693,GO:0005615	vitamin E binding|protein stabilization|vitamin transport|protein transport within extracellular region|extracellular space
Afmid	3.84637	4.42896	3.1535	3.1717	1.59632	2.66643	3.30868	3.86979	3.60042	3.87859	5.03519	4.5173	GeneID:688283,Genbank:XM_017597530.1,RGD:1591143	arylformamidase	GO:0005737,GO:0005829,GO:0009056,GO:0016787,GO:0019441,GO:0034354,GO:0004061,GO:0005634	cytoplasm|cytosol|catabolic process|hydrolase activity|tryptophan catabolic process to kynurenine|'de novo' NAD biosynthetic process from tryptophan|arylformamidase activity|nucleus	rno00630,rno00380	Glyoxylate and dicarboxylate metabolism|Tryptophan metabolism
Afp	0	0	0	0	0	0.017454	0	0	0	0	0	0	GeneID:24177,Genbank:NM_012493.2,RGD:2065	alpha-fetoprotein	GO:0042448,GO:0003674,GO:0046872,GO:0005615,GO:0060395,GO:0005737,GO:0010033,GO:0019953,GO:0031016,GO:0001542,GO:0031100,GO:0001889	progesterone metabolic process|molecular_function|metal ion binding|extracellular space|SMAD protein signal transduction|cytoplasm|response to organic substance|sexual reproduction|pancreas development|ovulation from ovarian follicle|animal organ regeneration|liver development	rno04390	Hippo signaling pathway
Aftph	41.5692	42.0965	44.4471	28.0991	28.3856	30.076	39.8208	29.1229	38.2821	49.2091	54.6484	50.289	GeneID:305544,Genbank:NM_001305127.1,RGD:1311920	aftiphilin	GO:0005794,GO:0005829,GO:0030121,GO:0030276,GO:0043231,GO:0046907,GO:0005634,GO:0005737	Golgi apparatus|cytosol|AP-1 adaptor complex|clathrin binding|intracellular membrane-bounded organelle|intracellular transport|nucleus|cytoplasm
Aga	32.1306	29.9892	31.9386	25.9621	26.7761	25.318	27.9466	23.2067	34.0497	29.4496	33.4478	31.5047	GeneID:290923,Genbank:XM_006253111.3,RGD:1309646	aspartylglucosaminidase	GO:0005764,GO:0005783,GO:0006508,GO:0006517,GO:0008150,GO:0008233,GO:0043621,GO:0051604,GO:0003948,GO:0005615	lysosome|endoplasmic reticulum|proteolysis|protein deglycosylation|biological_process|peptidase activity|protein self-association|protein maturation|N4-(beta-N-acetylglucosaminyl)-L-asparaginase activity|extracellular space	rno00511,rno04142	Other glycan degradation|Lysosome
Agap1	18.2462	17.2386	17.693	9.4737	9.2634	9.63586	11.3396	9.70866	12.5541	14.6703	14.7836	14.6865	GeneID:316611,Genbank:XM_017596490.1,RGD:1309244	ArfGAP with GTPase domain, ankyrin repeat and PH domain 1	GO:0046872,GO:0005525,GO:0005543,GO:0005634,GO:0005737,GO:0005829,GO:0007165,GO:0016020,GO:0016192,GO:0031267,GO:0032012,GO:0003924,GO:0043231,GO:0005096,GO:0043547	metal ion binding|GTP binding|phospholipid binding|nucleus|cytoplasm|cytosol|signal transduction|membrane|vesicle-mediated transport|small GTPase binding|regulation of ARF protein signal transduction|GTPase activity|intracellular membrane-bounded organelle|GTPase activator activity|positive regulation of GTPase activity	rno04144	Endocytosis
Agap2	1.97003	1.46344	1.467	0.450394	0.618756	0.673764	1.52312	0.813016	1.47737	1.25925	1.08336	1.12481	GeneID:65218,Genbank:XM_008765421.2,RGD:628844	ArfGAP with GTPase domain, ankyrin repeat and PH domain 2	GO:2001240,GO:0043066,GO:0016020,GO:0005515,GO:0043231,GO:0016192,GO:0005525,GO:0043524,GO:0019901,GO:0005634,GO:0005730,GO:0030295,GO:0005737,GO:0043547,GO:0031267,GO:0005739,GO:0045944,GO:0032012,GO:0046427,GO:0032147,GO:0005829,GO:0003924,GO:0046872,GO:0033601,GO:0005096,GO:0060749,GO:0042177,GO:0014068	negative regulation of extrinsic apoptotic signaling pathway in absence of ligand|negative regulation of apoptotic process|membrane|protein binding|intracellular membrane-bounded organelle|vesicle-mediated transport|GTP binding|negative regulation of neuron apoptotic process|protein kinase binding|nucleus|nucleolus|protein kinase activator activity|cytoplasm|positive regulation of GTPase activity…	rno04068,rno04144	FoxO signaling pathway|Endocytosis
Agap3	13.7894	13.7166	12.6356	9.4474	9.96923	9.67128	11.8421	9.98313	12.2406	13.0833	14.6191	14.3801	GeneID:362300,Genbank:NM_001108616.1,RGD:1310751	ArfGAP with GTPase domain, ankyrin repeat and PH domain 3	GO:0032012,GO:0005096,GO:0034614,GO:0005525,GO:0043161,GO:0005634,GO:0005737,GO:0005829,GO:0007165,GO:0043231,GO:0016020,GO:0043547,GO:0046872,GO:0016192,GO:0000060,GO:0071944,GO:0031267,GO:0003924,GO:0031593	regulation of ARF protein signal transduction|GTPase activator activity|cellular response to reactive oxygen species|GTP binding|proteasome-mediated ubiquitin-dependent protein catabolic process|nucleus|cytoplasm|cytosol|signal transduction|intracellular membrane-bounded organelle|membrane|positive regulation of GTPase activity|metal ion binding|vesicle-mediated transport|protein import into nucl…	rno04144	Endocytosis
Agbl1	0.22518	0.208804	0.206278	0	0	0.00911721	0.0116728	0.014342	0.00496667	0.0448233	0.0475307	0.0372464	GeneID:308724,Genbank:XM_008759580.2,RGD:1560280	ATP/GTP binding protein-like 1	GO:0015631,GO:0035609,GO:0035610,GO:0004181,GO:0006508,GO:0008270	tubulin binding|C-terminal protein deglutamylation|protein side chain deglutamylation|metallocarboxypeptidase activity|proteolysis|zinc ion binding
Agbl2	3.25864	4.08964	3.98241	2.81195	5.05234	2.94641	4.84264	4.26069	2.86581	4.42514	4.65447	4.38022	GeneID:366124,Genbank:XM_008762016.2,RGD:1306827	ATP/GTP binding protein-like 2	GO:0006508,GO:0008270,GO:0035610,GO:0036064,GO:0004181,GO:0005814,GO:0005829	proteolysis|zinc ion binding|protein side chain deglutamylation|ciliary basal body|metallocarboxypeptidase activity|centriole|cytosol
Agbl3	1.4369	1.62191	1.34798	1.54216	1.41118	1.9048	0.776168	3.13659	1.27312	1.61566	1.7187	1.7783	GeneID:500076,Genbank:XM_017592971.1,RGD:1561995	ATP/GTP binding protein-like 3	GO:0035610,GO:0004181,GO:0006508,GO:0008270	protein side chain deglutamylation|metallocarboxypeptidase activity|proteolysis|zinc ion binding
Agbl4	0.0373043	0.285117	0.239211	0	0	0.0256768	0	0	0	0.288539	0.0382459	0.139863	GeneID:362562,Genbank:NM_001100981.1,RGD:1564161	ATP/GTP binding protein-like 4
Agbl5	3.53821	3.53396	3.53587	1.89583	2.03843	1.99856	2.74262	2.18063	3.03149	3.75709	3.9974	3.66678	GeneID:362710,Genbank:XM_006239807.3,RGD:1598311	ATP/GTP binding protein-like 5	GO:0035611,GO:0005634,GO:0005737,GO:0045171,GO:0005829,GO:0006508,GO:0008270,GO:0015630,GO:0015631,GO:0051607,GO:0030496,GO:0072686,GO:0004181,GO:0035608	protein branching point deglutamylation|nucleus|cytoplasm|intercellular bridge|cytosol|proteolysis|zinc ion binding|microtubule cytoskeleton|tubulin binding|defense response to virus|midbody|mitotic spindle|metallocarboxypeptidase activity|protein deglutamylation
Ager	4.13171	3.7271	2.6803	2.79327	3.20916	1.86744	4.09421	3.87842	4.36177	3.49752	3.41789	3.15799	GeneID:81722,Genbank:NM_053336.2,RGD:69258	advanced glycosylation end product-specific receptor	GO:0090647,GO:0150003,GO:1900271,GO:0001937,GO:1900272,GO:0005515,GO:0005576,GO:1900453,GO:1904599,GO:0005615,GO:1904604,GO:1900744,GO:0005737,GO:1900745,GO:0005829,GO:1904645,GO:0009925,GO:0005886,GO:1904646,GO:0009986,GO:0010255,GO:0006954,GO:2000353,GO:2000379,GO:0010508,GO:2000514,GO:0010596,GO:0010628,GO:0030424,GO:0010718,GO:0031175,GO:0010763,GO:0014002,GO:0032693,GO:0001650,GO:0043025,GO:…	modulation of age-related behavioral decline|regulation of spontaneous synaptic transmission|regulation of long-term synaptic potentiation|negative regulation of endothelial cell proliferation|negative regulation of long-term synaptic potentiation|protein binding|extracellular region|negative regulation of long term synaptic depression|advanced glycation end-product binding|extracellular space|ne…	rno04933	AGE-RAGE signaling pathway in diabetic complications
Agfg1	40.0748	37.7833	36.2569	42.3398	42.9964	44.2492	53.417	46.522	41.1296	38.1619	36.9809	37.352	GeneID:363266,Genbank:NM_001135596.1,RGD:1560041	ArfGAP with FG repeats 1	GO:0043547,GO:0031410,GO:0005096,GO:0045109,GO:0032012,GO:0042995,GO:0005634,GO:0046872,GO:0005737,GO:0005829,GO:0007275,GO:0007289,GO:0043025,GO:0016020,GO:0016192,GO:0043231,GO:0031267,GO:0001675,GO:0003677	positive regulation of GTPase activity|cytoplasmic vesicle|GTPase activator activity|intermediate filament organization|regulation of ARF protein signal transduction|cell projection|nucleus|metal ion binding|cytoplasm|cytosol|multicellular organism development|spermatid nucleus differentiation|neuronal cell body|membrane|vesicle-mediated transport|intracellular membrane-bounded organelle|small GT…	rno05164	Influenza A
Agfg2	7.35642	7.30656	7.45323	4.94515	4.78439	5.04721	6.35784	5.90708	5.86521	6.70128	7.86511	7.61873	GeneID:304375,Genbank:XM_006249142.3,RGD:1306590	ArfGAP with FG repeats 2	GO:0005737,GO:0005829,GO:0016020,GO:0016192,GO:0031267,GO:0032012,GO:0043231,GO:0043547,GO:0046872,GO:0005096,GO:0005634	cytoplasm|cytosol|membrane|vesicle-mediated transport|small GTPase binding|regulation of ARF protein signal transduction|intracellular membrane-bounded organelle|positive regulation of GTPase activity|metal ion binding|GTPase activator activity|nucleus
Aggf1	8.46725	8.39152	9.27741	8.37674	6.91747	7.90135	10.5968	7.47017	8.94658	8.55339	8.50265	9.60375	GeneID:310005,Genbank:XM_017591362.1,RGD:1310888	angiogenic factor with G patch and FHA domains 1	GO:0003676,GO:0003723,GO:0005575,GO:0005576,GO:0005737,GO:0006397,GO:0007155,GO:0008150,GO:0016607,GO:0043484,GO:0045766,GO:0001570,GO:0001938,GO:0048471,GO:0003674	nucleic acid binding|RNA binding|cellular_component|extracellular region|cytoplasm|mRNA processing|cell adhesion|biological_process|nuclear speck|regulation of RNA splicing|positive regulation of angiogenesis|vasculogenesis|positive regulation of endothelial cell proliferation|perinuclear region of cytoplasm|molecular_function
Agk	5.46186	6.32269	5.59505	6.64138	5.70928	5.9657	7.94005	6.75128	7.42056	5.31159	5.4771	5.85187	GeneID:502749,Genbank:XM_006236363.3,RGD:1562046	acylglycerol kinase	GO:0005739,GO:0005743,GO:0005758,GO:0016020,GO:0031305,GO:0042721,GO:0043231,GO:0045039,GO:0046513,GO:0046834,GO:0001727,GO:0001729,GO:0003951	mitochondrion|mitochondrial inner membrane|mitochondrial intermembrane space|membrane|integral component of mitochondrial inner membrane|mitochondrial inner membrane protein insertion complex|intracellular membrane-bounded organelle|protein import into mitochondrial inner membrane|ceramide biosynthetic process|lipid phosphorylation|lipid kinase activity|ceramide kinase activity|NAD+ kinase activi…	rno00561	Glycerolipid metabolism
Agl	19.7165	17.3722	19.914	9.06104	9.8479	8.29786	7.94213	8.37924	11.4879	15.353	13.5459	14.398	GeneID:362029,Genbank:NM_001108564.1,RGD:1306376	amylo-alpha-1, 6-glucosidase, 4-alpha-glucanotransferase	GO:0007584,GO:0004134,GO:0009725,GO:0016234,GO:0004135,GO:0005634,GO:0016529,GO:0005737,GO:0030246,GO:0005977,GO:0030247,GO:0005978,GO:0031593,GO:0005980,GO:0004133,GO:0051384	response to nutrient|4-alpha-glucanotransferase activity|response to hormone|inclusion body|amylo-alpha-1,6-glucosidase activity|nucleus|sarcoplasmic reticulum|cytoplasm|carbohydrate binding|glycogen metabolic process|polysaccharide binding|glycogen biosynthetic process|polyubiquitin modification-dependent protein binding|glycogen catabolic process|glycogen debranching enzyme activity|response to…	rno00500	Starch and sucrose metabolism
Agmat	0.536353	0.337118	0.530122	0.503398	0.344286	0.378891	0.858244	0.264898	0.931462	0.7915	0.448596	0.542418	GeneID:298607,Genbank:XM_008764233.2,RGD:1308424	agmatinase	GO:0033388,GO:0046872,GO:0005739,GO:0008295,GO:0008783	putrescine biosynthetic process from arginine|metal ion binding|mitochondrion|spermidine biosynthetic process|agmatinase activity	rno00330	Arginine and proline metabolism
Agmo	3.08624	3.24566	2.76144	1.11991	1.4401	1.20211	0.463828	0.863471	1.48913	2.96078	2.64905	2.70215	GeneID:362732,Genbank:NM_001135899.1,RGD:1312038	alkylglycerol monooxygenase	GO:0055114,GO:0005783,GO:0005789,GO:0006643,GO:0008610,GO:0016021,GO:0046485,GO:0050479,GO:0005506	oxidation-reduction process|endoplasmic reticulum|endoplasmic reticulum membrane|membrane lipid metabolic process|lipid biosynthetic process|integral component of membrane|ether lipid metabolic process|glyceryl-ether monooxygenase activity|iron ion binding
Ago1	16.6292	15.9192	17.2532	12.5728	12.839	12.8481	14.8998	12.9531	17.0284	18.0052	16.9319	18.1819	GeneID:313594,Genbank:XM_008764025.2,RGD:1304619	argonaute 1, RISC catalytic component	GO:0035278,GO:0010501,GO:0000993,GO:0035279,GO:0010586,GO:0001047,GO:0035280,GO:0010628,GO:0003674,GO:0044212,GO:0003723,GO:0003725,GO:0003727,GO:0004521,GO:0016442,GO:0005575,GO:0045944,GO:0016525,GO:0005634,GO:0070578,GO:0031054,GO:0005737,GO:0090625,GO:0035068,GO:0005829,GO:0000932,GO:1901224,GO:0035196,GO:0005844,GO:0000956,GO:0035198,GO:0008150,GO:0000978	miRNA mediated inhibition of translation|RNA secondary structure unwinding|RNA polymerase II core binding|mRNA cleavage involved in gene silencing by miRNA|miRNA metabolic process|core promoter binding|miRNA loading onto RISC involved in gene silencing by miRNA|positive regulation of gene expression|molecular_function|transcription regulatory region DNA binding|RNA binding|double-stranded RNA bin…
Ago2	38.3252	37.089	38.406	32.1707	33.5858	31.1477	38.7724	33.1074	31.6229	33.047	33.5468	35.0653	GeneID:59117,Genbank:NM_021597.1,RGD:621255	argonaute 2, RISC catalytic component	GO:1905618,GO:0003674,GO:0003723,GO:0003725,GO:0003727,GO:0003729,GO:0005844,GO:0003743,GO:0005845,GO:0004521,GO:0005515,GO:0006351,GO:0006413,GO:0030054,GO:0008022,GO:0030154,GO:0030425,GO:0008150,GO:0031047,GO:0031054,GO:0000340,GO:0035198,GO:0035278,GO:0035068,GO:0000932,GO:0035279,GO:0000993,GO:0001047,GO:0070062,GO:0035280,GO:0070551,GO:0045766,GO:0070578,GO:0090502,GO:0090624,GO:0090625,GO:…	positive regulation of miRNA mediated inhibition of translation|molecular_function|RNA binding|double-stranded RNA binding|single-stranded RNA binding|mRNA binding|polysome|translation initiation factor activity|mRNA cap binding complex|endoribonuclease activity|protein binding|transcription, DNA-templated|translational initiation|cell junction|protein C-terminus binding|cell differentiation|dend…
Ago3	6.65062	6.15816	6.14725	3.04792	3.05741	3.40997	2.94061	3.27621	3.67899	5.21768	5.45558	5.531	GeneID:313593,Genbank:XM_008764024.2,RGD:1309163	argonaute 3, RISC catalytic component	GO:0090625,GO:0035068,GO:0003723,GO:1901224,GO:0035196,GO:0003725,GO:0035198,GO:0003727,GO:0005575,GO:0005654,GO:0005737,GO:0035278,GO:0006402,GO:0035279,GO:0008150,GO:0035280,GO:0010501,GO:0036464,GO:0010628,GO:0000794,GO:0070578,GO:0016442,GO:0000932,GO:0072091,GO:0031054,GO:0003674	mRNA cleavage involved in gene silencing by siRNA|micro-ribonucleoprotein complex|RNA binding|positive regulation of NIK/NF-kappaB signaling|production of miRNAs involved in gene silencing by miRNA|double-stranded RNA binding|miRNA binding|single-stranded RNA binding|cellular_component|nucleoplasm|cytoplasm|miRNA mediated inhibition of translation|mRNA catabolic process|mRNA cleavage involved in …
Ago4	1.70455	1.95486	1.71143	0.856687	0.761611	1.07283	1.35159	1.09426	1.80133	1.4588	1.38639	1.57434	GeneID:298533,Genbank:XM_006238862.2,RGD:1304583	argonaute 4, RISC catalytic component	GO:0035068,GO:0008150,GO:0003725,GO:0035196,GO:0008584,GO:0003727,GO:0035198,GO:0010501,GO:0003743,GO:0035278,GO:0005575,GO:0005634,GO:0005654,GO:0005737,GO:0010586,GO:0005829,GO:0035279,GO:0016442,GO:0035280,GO:0016604,GO:0006402,GO:0043066,GO:0006413,GO:0000932,GO:0070578,GO:0022604,GO:0007130,GO:0003674,GO:0090625,GO:0031054,GO:0007140,GO:0003723	micro-ribonucleoprotein complex|biological_process|double-stranded RNA binding|production of miRNAs involved in gene silencing by miRNA|male gonad development|single-stranded RNA binding|miRNA binding|RNA secondary structure unwinding|translation initiation factor activity|miRNA mediated inhibition of translation|cellular_component|nucleus|nucleoplasm|cytoplasm|miRNA metabolic process|cytosol|mRN…
Agpat1	21.3838	25.7103	22.1462	23.1969	24.3234	25.5622	21.3043	19.4053	21.8421	20.3688	21.1126	19.3629	GeneID:406165,Genbank:XM_006255975.1,RGD:1303287	1-acylglycerol-3-phosphate O-acyltransferase 1	GO:0005783,GO:0006654,GO:0016021,GO:0016411,GO:0046474,GO:0001819,GO:0003841	endoplasmic reticulum|phosphatidic acid biosynthetic process|integral component of membrane|acylglycerol O-acyltransferase activity|glycerophospholipid biosynthetic process|positive regulation of cytokine production|1-acylglycerol-3-phosphate O-acyltransferase activity	rno00561,rno00564,rno04072,rno04975	Glycerolipid metabolism|Glycerophospholipid metabolism|Phospholipase D signaling pathway|Fat digestion and absorption
Agpat2	14.0493	15.7504	14.2479	18.0837	14.3923	15.0126	24.3904	18.4801	20.643	16.143	18.8145	18.9491	GeneID:311821,Genbank:NM_001107821.2,RGD:1309229	1-acylglycerol-3-phosphate O-acyltransferase 2	GO:0005575,GO:0005783,GO:0006654,GO:0008544,GO:0016021,GO:0016411,GO:0042493,GO:0046474,GO:0001819,GO:0003674,GO:0003841	cellular_component|endoplasmic reticulum|phosphatidic acid biosynthetic process|epidermis development|integral component of membrane|acylglycerol O-acyltransferase activity|response to drug|glycerophospholipid biosynthetic process|positive regulation of cytokine production|molecular_function|1-acylglycerol-3-phosphate O-acyltransferase activity	rno00561,rno00564,rno04072,rno04975	Glycerolipid metabolism|Glycerophospholipid metabolism|Phospholipase D signaling pathway|Fat digestion and absorption
Agpat3	6.436	6.14516	6.75049	4.71985	4.6716	5.02759	5.71194	4.88489	5.73181	5.45306	5.46227	5.84334	GeneID:294324,Genbank:XM_006256243.3,RGD:1305787	1-acylglycerol-3-phosphate O-acyltransferase 3	GO:0005783,GO:0016021,GO:0042171	endoplasmic reticulum|integral component of membrane|lysophosphatidic acid acyltransferase activity	rno00561,rno00564,rno04072	Glycerolipid metabolism|Glycerophospholipid metabolism|Phospholipase D signaling pathway
Agpat4	8.29232	7.59351	6.45734	3.46424	3.19106	3.08178	3.86409	3.21587	4.09854	4.2287	4.43481	4.58857	GeneID:170919,Genbank:XM_006227857.3,RGD:619916	1-acylglycerol-3-phosphate O-acyltransferase 4	GO:0016021,GO:0016024,GO:0016746,GO:0042171,GO:0003841,GO:0005741,GO:0006644	integral component of membrane|CDP-diacylglycerol biosynthetic process|transferase activity, transferring acyl groups|lysophosphatidic acid acyltransferase activity|1-acylglycerol-3-phosphate O-acyltransferase activity|mitochondrial outer membrane|phospholipid metabolic process	rno00561,rno00564,rno04072	Glycerolipid metabolism|Glycerophospholipid metabolism|Phospholipase D signaling pathway
Agpat5	8.49034	9.28947	8.73779	11.2428	8.42004	8.78412	9.05761	10.1656	8.26267	9.21363	7.91906	8.36259	GeneID:306582,Genbank:XM_017600149.1,RGD:1306405	1-acylglycerol-3-phosphate O-acyltransferase 5	GO:0006639,GO:0016021,GO:0002244,GO:0003841,GO:0005739	acylglycerol metabolic process|integral component of membrane|hematopoietic progenitor cell differentiation|1-acylglycerol-3-phosphate O-acyltransferase activity|mitochondrion	rno00561,rno00564,rno04072	Glycerolipid metabolism|Glycerophospholipid metabolism|Phospholipase D signaling pathway
Agps	26.3708	29.7198	27.3063	37.0763	31.0816	34.6636	51.0915	35.0632	35.0793	29.1488	33.0763	33.0858	GeneID:84114,Genbank:NM_053350.2,RGD:620364	alkylglycerone phosphate synthase	GO:0071949,GO:0005777,GO:0008609,GO:0008610,GO:0008611,GO:0016614,GO:0005730,GO:0050660,GO:0055114,GO:0005739	FAD binding|peroxisome|alkylglycerone-phosphate synthase activity|lipid biosynthetic process|ether lipid biosynthetic process|oxidoreductase activity, acting on CH-OH group of donors|nucleolus|flavin adenine dinucleotide binding|oxidation-reduction process|mitochondrion	rno00565,rno04146	Ether lipid metabolism|Peroxisome
Agr2	0.56347	0.572896	0.629826	0.925686	0.325405	1.17419	2.24587	1.21273	1.37234	0.514798	0.847989	0.857631	GeneID:298961,Genbank:NM_001106725.1,RGD:1304606	anterior gradient 2, protein disulphide isomerase family member	GO:0048639,GO:0005154,GO:0060480,GO:0005575,GO:0060548,GO:0005615,GO:0005783,GO:0008150,GO:0010628,GO:0010811,GO:0070254,GO:0030154,GO:1903078,GO:0034976,GO:1903896,GO:0042803,GO:0002162,GO:1903899,GO:0045742,GO:0048546,GO:0003674	positive regulation of developmental growth|epidermal growth factor receptor binding|lung goblet cell differentiation|cellular_component|negative regulation of cell death|extracellular space|endoplasmic reticulum|biological_process|positive regulation of gene expression|positive regulation of cell-substrate adhesion|mucus secretion|cell differentiation|positive regulation of protein localization …
Agr3	0.918648	0.74263	1.2731	0.192522	0.185342	0.178344	0.311365	0.374063	0.141315	0.660447	0.579591	0.574038	GeneID:298959,Genbank:NM_001106724.1,RGD:1565406	anterior gradient 3, protein disulphide isomerase family member	GO:0005783,GO:0030154,GO:0043231,GO:0060548,GO:0002162	endoplasmic reticulum|cell differentiation|intracellular membrane-bounded organelle|negative regulation of cell death|dystroglycan binding
Agrn	28.3672	32.8646	25.0655	27.0672	28.395	26.424	53.0892	33.2177	34.2422	27.7851	27.4028	25.5285	GeneID:25592,Genbank:XM_017593169.1,RGD:2067	agrin	GO:0005578,GO:0005604,GO:0005605,GO:0005615,GO:0016021,GO:0005829,GO:0030054,GO:0030548,GO:0005886,GO:0031012,GO:0032092,GO:0033691,GO:0043395,GO:0035374,GO:0043525,GO:0043547,GO:0036122,GO:0044295,GO:0044325,GO:0045202,GO:0001932,GO:0071340,GO:0045213,GO:0001934,GO:0086036,GO:0045887,GO:0099601,GO:0002162,GO:1902667,GO:0005509,GO:1903277,GO:1903407,GO:2000541,GO:0005515,GO:0005576,GO:0007009,GO:…	proteinaceous extracellular matrix|basement membrane|basal lamina|extracellular space|integral component of membrane|cytosol|cell junction|acetylcholine receptor regulator activity|plasma membrane|extracellular matrix|positive regulation of protein binding|sialic acid binding|heparan sulfate proteoglycan binding|chondroitin sulfate binding|positive regulation of neuron apoptotic process|positive …	rno04512	ECM-receptor interaction
Agrp	0.148886	0.160022	0.204583	0.193595	0.117151	0.166529	0.147605	0.161207	0.181436	0.359874	0.133564	0.261661	GeneID:25582,Genbank:XM_008772474.2,RGD:2068	agouti related neuropeptide	GO:0043025,GO:0005615,GO:0048571,GO:0060135,GO:0005796,GO:0007218,GO:0007623,GO:0007631,GO:0060259,GO:0008343,GO:2000253,GO:0009755,GO:0010469,GO:0005179,GO:0032868,GO:0005184,GO:0042755	neuronal cell body|extracellular space|long-day photoperiodism|maternal process involved in female pregnancy|Golgi lumen|neuropeptide signaling pathway|circadian rhythm|feeding behavior|regulation of feeding behavior|adult feeding behavior|positive regulation of feeding behavior|hormone-mediated signaling pathway|regulation of signaling receptor activity|hormone activity|response to insulin|neuro…	rno04920	Adipocytokine signaling pathway
Agt	1.05256	0.82878	0.752293	0.644567	0.700785	0.589138	0.570803	0.918405	0.685245	0.469687	0.865671	1.09499	GeneID:24179,Genbank:XM_008772597.2,RGD:2069	angiotensinogen	GO:0070471,GO:0071260,GO:0090190,GO:0097755,GO:0002018,GO:1900020,GO:0002019,GO:1901201,GO:0002027,GO:1903598,GO:0002035,GO:1903779,GO:0003014,GO:1904385,GO:0003051,GO:1904707,GO:0007186,GO:0003331,GO:0004867,GO:0007202,GO:0005179,GO:0007204,GO:0007250,GO:0007565,GO:0007568,GO:0010666,GO:0007588,GO:0010873,GO:0008065,GO:0010951,GO:0008217,GO:0010976,GO:0014061,GO:0014068,GO:0001543,GO:0032930,GO:…	uterine smooth muscle contraction|cellular response to mechanical stimulus|positive regulation of branching involved in ureteric bud morphogenesis|positive regulation of blood vessel diameter|renin-angiotensin regulation of aldosterone production|positive regulation of protein kinase C activity|regulation of renal output by angiotensin|regulation of extracellular matrix assembly|regulation of hea…	rno04924,rno04614,rno04270,rno05410	Renin secretion|Renin-angiotensin system|Vascular smooth muscle contraction|Hypertrophic cardiomyopathy (HCM)
Agtpbp1	22.383	20.7862	23.2696	9.37696	10.6101	10.1605	9.9656	9.95473	10.5847	18.9445	16.8105	17.9867	GeneID:290986,Genbank:XM_008771436.2,RGD:1306307	ATP/GTP binding protein 1	GO:0035610,GO:0005730,GO:0042133,GO:0043231,GO:0005737,GO:0005739,GO:0005829,GO:0006508,GO:0007005,GO:0050905,GO:0007628,GO:0060041,GO:0008270,GO:0015631,GO:0021702,GO:0001754,GO:0021772,GO:0004181,GO:0035609,GO:0005634	protein side chain deglutamylation|nucleolus|neurotransmitter metabolic process|intracellular membrane-bounded organelle|cytoplasm|mitochondrion|cytosol|proteolysis|mitochondrion organization|neuromuscular process|adult walking behavior|retina development in camera-type eye|zinc ion binding|tubulin binding|cerebellar Purkinje cell differentiation|eye photoreceptor cell differentiation|olfactory b…
Agtr1a	9.7617	9.33603	9.62945	12.2151	6.10706	7.73012	3.80085	5.9108	4.5548	3.78729	4.44329	3.62279	GeneID:24180,Genbank:XM_008771594.2,RGD:2070	angiotensin II receptor, type 1a	GO:0002001,GO:0002018,GO:0002019,GO:0002035,GO:0007200,GO:0007204,GO:0004945,GO:0005515,GO:0007266,GO:0007507,GO:0007568,GO:0019722,GO:0008217,GO:0019901,GO:0008284,GO:0030425,GO:0031410,GO:0031711,GO:0031748,GO:0031968,GO:0001568,GO:0042976,GO:0031983,GO:0043524,GO:0032270,GO:0001596,GO:0043621,GO:0032430,GO:0043627,GO:0001822,GO:0045777,GO:0001921,GO:0001965,GO:0046982,GO:0001991,GO:0050715,GO:…	renin secretion into blood stream|renin-angiotensin regulation of aldosterone production|regulation of renal output by angiotensin|brain renin-angiotensin system|phospholipase C-activating G-protein coupled receptor signaling pathway|positive regulation of cytosolic calcium ion concentration|angiotensin type II receptor activity|protein binding|Rho protein signal transduction|heart development|ag…	rno04371,rno04020,rno04072,rno04022,rno04080,rno04924,rno04614,rno04925,rno04927,rno04261,rno04270,rno05200,rno04933,rno04934	Apelin signaling pathway|Calcium signaling pathway|Phospholipase D signaling pathway|cGMP - PKG signaling pathway|Neuroactive ligand-receptor interaction|Renin secretion|Renin-angiotensin system|Aldosterone synthesis and secretion|Cortisol synthesis and secretion|Adrenergic signaling in cardiomyocytes|Vascular smooth muscle contraction|Pathways in cancer|AGE-RAGE signaling pathway in diabetic com…
Agtr1b	0.261927	0.0879216	0.142668	0.215658	0.033421	0.00487259	0.0062384	0.0306597	0.0424701	0.00684438	0	0.0199059	GeneID:81638,Genbank:NM_031009.2,RGD:2071	angiotensin II receptor, type 1b	GO:0042756,GO:0016021,GO:0001666,GO:0043524,GO:0016323,GO:0001822,GO:0043621,GO:0017046,GO:0001991,GO:0043627,GO:0001999,GO:0002019,GO:0002035,GO:0004945,GO:0019229,GO:0006954,GO:0045777,GO:0031983,GO:0007186,GO:0071549,GO:0035094,GO:0007204,GO:0086097,GO:0035902,GO:0007584,GO:0001568,GO:0090190,GO:0038166,GO:0009651,GO:0001596,GO:1990776,GO:0042493,GO:0012506	drinking behavior|integral component of membrane|response to hypoxia|negative regulation of neuron apoptotic process|basolateral plasma membrane|kidney development|protein self-association|peptide hormone binding|regulation of systemic arterial blood pressure by circulatory renin-angiotensin|response to estrogen|renal response to blood flow involved in circulatory renin-angiotensin regulation of …	rno04371,rno04020,rno04072,rno04022,rno04080,rno04924,rno04614,rno04925,rno04927,rno04261,rno04270,rno05200,rno04933,rno04934	Apelin signaling pathway|Calcium signaling pathway|Phospholipase D signaling pathway|cGMP - PKG signaling pathway|Neuroactive ligand-receptor interaction|Renin secretion|Renin-angiotensin system|Aldosterone synthesis and secretion|Cortisol synthesis and secretion|Adrenergic signaling in cardiomyocytes|Vascular smooth muscle contraction|Pathways in cancer|AGE-RAGE signaling pathway in diabetic com…
Agtr2	0.446989	1.29694	0.62937	0.43053	0.990003	1.77192	3.66186	1.85226	2.93616	0.0480186	0.178217	0.395691	GeneID:24182,Genbank:XM_006257432.3,RGD:2072	angiotensin II receptor, type 2	GO:0005886,GO:0006883,GO:0006954,GO:0007166,GO:0007199,GO:0008134,GO:0035815,GO:0008284,GO:0035932,GO:0010243,GO:0038166,GO:0010459,GO:0042306,GO:0042311,GO:0042416,GO:0043524,GO:2001238,GO:0045893,GO:0048147,GO:0048471,GO:0001822,GO:0001965,GO:0001991,GO:0002018,GO:0002033,GO:0002035,GO:0004945,GO:0005515,GO:0010700,GO:0016021,GO:0017046,GO:0021695,GO:0030182,GO:0032304,GO:0032516,GO:0050715,GO:…	plasma membrane|cellular sodium ion homeostasis|inflammatory response|cell surface receptor signaling pathway|G-protein coupled receptor signaling pathway coupled to cGMP nucleotide second messenger|transcription factor binding|positive regulation of renal sodium excretion|positive regulation of cell proliferation|aldosterone secretion|response to organonitrogen compound|angiotensin-activated sig…	rno04080,rno04614,rno04261	Neuroactive ligand-receptor interaction|Renin-angiotensin system|Adrenergic signaling in cardiomyocytes
Agtrap	15.8942	15.8717	16.2381	14.3079	13.5098	14.3714	19.5541	15.6823	18.579	17.3512	17.9951	17.2558	GeneID:298646,Genbank:NM_001007654.1,RGD:1359346	angiotensin II receptor-associated protein	GO:0043231,GO:0004945,GO:0005575,GO:0005654,GO:0005789,GO:0005829,GO:0005886,GO:0005938,GO:0008217,GO:0016021,GO:0000139,GO:0030659,GO:0001666,GO:0038166,GO:0003674	intracellular membrane-bounded organelle|angiotensin type II receptor activity|cellular_component|nucleoplasm|endoplasmic reticulum membrane|cytosol|plasma membrane|cell cortex|regulation of blood pressure|integral component of membrane|Golgi membrane|cytoplasmic vesicle membrane|response to hypoxia|angiotensin-activated signaling pathway|molecular_function
Agxt	0	0	0	0.0547706	0	0	0	0.0319252	0	0	0	0.0138184	GeneID:24792,Genbank:NM_030656.2,RGD:2073	alanine-glyoxylate aminotransferase	GO:0046487,GO:0030170,GO:0008453,GO:0005102,GO:0046724,GO:0042802,GO:0008483,GO:0005739,GO:0051384,GO:0042803,GO:0009436,GO:0051591,GO:0005759,GO:0005777,GO:0016597,GO:0042853,GO:0005782,GO:0042866,GO:0019265,GO:0007219,GO:0043231,GO:0003824,GO:0043621,GO:0004760,GO:0019448	glyoxylate metabolic process|pyridoxal phosphate binding|alanine-glyoxylate transaminase activity|signaling receptor binding|oxalic acid secretion|identical protein binding|transaminase activity|mitochondrion|response to glucocorticoid|protein homodimerization activity|glyoxylate catabolic process|response to cAMP|mitochondrial matrix|peroxisome|amino acid binding|L-alanine catabolic process|pero…	rno00630,rno00250,rno00260,rno04146	Glyoxylate and dicarboxylate metabolism|Alanine, aspartate and glutamate metabolism|Glycine, serine and threonine metabolism|Peroxisome
Agxt2	0.0223925	0.0320899	0.0205129	0	0	0.0308258	0	0	0	0.010825	0.0114789	0	GeneID:83784,Genbank:XM_006232069.3,RGD:621767	alanine-glyoxylate aminotransferase 2	GO:0045429,GO:0005759,GO:0047305,GO:0008453,GO:0009436,GO:0016223,GO:0019265,GO:0019481,GO:0030170,GO:0005739,GO:0042802	positive regulation of nitric oxide biosynthetic process|mitochondrial matrix|(R)-3-amino-2-methylpropionate-pyruvate transaminase activity|alanine-glyoxylate transaminase activity|glyoxylate catabolic process|beta-alanine-pyruvate transaminase activity|glycine biosynthetic process, by transamination of glyoxylate|L-alanine catabolic process, by transamination|pyridoxal phosphate binding|mitochon…	rno00250,rno00260,rno00270,rno00280	Alanine, aspartate and glutamate metabolism|Glycine, serine and threonine metabolism|Cysteine and methionine metabolism|Valine, leucine and isoleucine degradation
Ahctf1	21.0644	20.6525	20.0753	17.3279	16.2042	15.8119	21.7428	17.0098	17.6291	19.5356	19.9716	21.3673	GeneID:360886,Genbank:XM_008769858.1,RGD:1561291	AT hook containing transcription factor 1	GO:0005634,GO:0005643,GO:0005737,GO:0006355,GO:0016363,GO:0031080,GO:0031965,GO:0032465,GO:0034399,GO:0000777,GO:0051292,GO:0000785,GO:0003700	nucleus|nuclear pore|cytoplasm|regulation of transcription, DNA-templated|nuclear matrix|nuclear pore outer ring|nuclear membrane|regulation of cytokinesis|nuclear periphery|condensed chromosome kinetochore|nuclear pore complex assembly|chromatin|DNA binding transcription factor activity
Ahcy	23.3561	22.1241	22.7371	32.071	27.0001	32.9979	42.313	29.6156	29.7535	19.294	17.9147	19.6934	GeneID:29443,Genbank:NM_017201.1,RGD:69260	adenosylhomocysteinase	GO:0098604,GO:0030554,GO:0004013,GO:0033353,GO:0042470,GO:0005507,GO:0005634,GO:0005829,GO:0042745,GO:0042802,GO:0043005,GO:0006730,GO:0043621,GO:0007584,GO:0001666,GO:0051287,GO:0019510,GO:0002439,GO:0071268	adenosylselenohomocysteinase activity|adenyl nucleotide binding|adenosylhomocysteinase activity|S-adenosylmethionine cycle|melanosome|copper ion binding|nucleus|cytosol|circadian sleep/wake cycle|identical protein binding|neuron projection|one-carbon metabolic process|protein self-association|response to nutrient|response to hypoxia|NAD binding|S-adenosylhomocysteine catabolic process|chronic inf…	rno00270	Cysteine and methionine metabolism
Ahcyl1	42.2573	40.753	42.2582	44.525	41.3328	42.9194	47.2049	42.8553	43.5575	41.8527	42.8352	40.6916	GeneID:362013,Genbank:XM_008761405.2,RGD:1309768	adenosylhomocysteinase-like 1	GO:0033353,GO:0004013,GO:0038166,GO:0005737,GO:0005783,GO:0005829,GO:0006378,GO:0042045,GO:0006611,GO:0042802,GO:0006730,GO:0043231,GO:0010765,GO:0044070,GO:0016324,GO:0003723,GO:0051592,GO:0031440,GO:0032412	S-adenosylmethionine cycle|adenosylhomocysteinase activity|angiotensin-activated signaling pathway|cytoplasm|endoplasmic reticulum|cytosol|mRNA polyadenylation|epithelial fluid transport|protein export from nucleus|identical protein binding|one-carbon metabolic process|intracellular membrane-bounded organelle|positive regulation of sodium ion transport|regulation of anion transport|apical plasma …	rno00270	Cysteine and methionine metabolism
Ahcyl2	8.06625	7.98619	8.06884	6.49098	6.70316	7.50574	9.0832	5.45722	7.40151	8.04158	9.4284	9.75385	GeneID:312192,Genbank:NM_001173510.2,RGD:1564895	adenosylhomocysteinase-like 2	GO:0005829,GO:0006730,GO:0033353,GO:0043005,GO:0043231,GO:0004013	cytosol|one-carbon metabolic process|S-adenosylmethionine cycle|neuron projection|intracellular membrane-bounded organelle|adenosylhomocysteinase activity	rno00270	Cysteine and methionine metabolism
Ahdc1	11.3142	11.4282	10.3705	9.37912	8.83814	8.46548	9.01323	9.54858	10.6562	9.10424	8.52034	9.22789	GeneID:362617,Genbank:XM_017593519.1,RGD:1310031	AT hook, DNA binding motif, containing 1
Ahi1	11.6643	12.3002	10.5016	8.59535	9.28522	8.16102	9.51604	7.77735	8.2603	10.4482	11.3751	10.1816	GeneID:308923,Genbank:NM_001002277.1,RGD:1303040	Abelson helper integration site 1	GO:0005813,GO:0005814,GO:0005911,GO:0010842,GO:0010976,GO:0005912,GO:0016192,GO:0021510,GO:0030862,GO:0036064,GO:0030902,GO:0032094,GO:0039008,GO:0039023,GO:0042462,GO:0001738,GO:0060041,GO:0042802,GO:0060271,GO:0001750,GO:0043066,GO:0001947,GO:0065001,GO:0002092,GO:0070121,GO:0005515,GO:0070986,GO:0005737,GO:0071599,GO:0005929,GO:0006903,GO:0007169,GO:0007417,GO:0033365,GO:0034613,GO:0010628,GO:…	centrosome|centriole|cell-cell junction|retina layer formation|positive regulation of neuron projection development|adherens junction|vesicle-mediated transport|spinal cord development|positive regulation of polarized epithelial cell differentiation|ciliary basal body|hindbrain development|response to food|pronephric nephron tubule morphogenesis|pronephric duct morphogenesis|eye photoreceptor cel…
Ahnak	226.686	233.245	232.672	112.841	145.969	110.137	98.4355	124.387	105.816	229.434	242.756	211.073	GeneID:191572,Genbank:XM_017588766.1,RGD:619779	AHNAK nucleoprotein	GO:0051259,GO:0043484,GO:0005737,GO:0070062,GO:0005829,GO:0097493,GO:0044291,GO:0005886,GO:0015629,GO:0030315,GO:1901385,GO:0044548,GO:0031982,GO:0045121,GO:0042383,GO:0005634,GO:0045296,GO:0043034	protein complex oligomerization|regulation of RNA splicing|cytoplasm|extracellular exosome|cytosol|structural molecule activity conferring elasticity|cell-cell contact zone|plasma membrane|actin cytoskeleton|T-tubule|regulation of voltage-gated calcium channel activity|S100 protein binding|vesicle|membrane raft|sarcolemma|nucleus|cadherin binding|costamere
Ahnak2	12.6586	16.0664	9.95724	8.98892	11.0159	10.1972	4.65032	8.93006	10.3971	15.6811	14.1351	16.8497	GeneID:314478,Genbank:XM_017594522.1,RGD:1309696	AHNAK nucleoprotein 2	GO:0043484,GO:0005829,GO:0005886,GO:0008366,GO:0019226,GO:0021675,GO:0030018,GO:0030315,GO:0030659,GO:0032287,GO:0001778,GO:0032290,GO:0003723,GO:0043034,GO:0005737	regulation of RNA splicing|cytosol|plasma membrane|axon ensheathment|transmission of nerve impulse|nerve development|Z disc|T-tubule|cytoplasmic vesicle membrane|peripheral nervous system myelin maintenance|plasma membrane repair|peripheral nervous system myelin formation|RNA binding|costamere|cytoplasm
Ahr	48.0596	49.8408	49.9815	38.5523	33.4613	39.7673	41.829	28.7521	41.5089	44.5987	39.6157	35.499	GeneID:25690,Genbank:XM_017594050.1,RGD:2074	aryl hydrocarbon receptor	GO:0001974,GO:0002260,GO:0002376,GO:0003085,GO:0003214,GO:0003243,GO:0003677,GO:0005634,GO:0005737,GO:0003700,GO:0005829,GO:0006351,GO:0009410,GO:0006355,GO:0009636,GO:0010468,GO:0014070,GO:0017025,GO:0019933,GO:0000122,GO:0043010,GO:0030522,GO:0000902,GO:0043029,GO:0030850,GO:0001094,GO:0043565,GO:0030888,GO:0001223,GO:0044212,GO:0001541,GO:0045793,GO:0001568,GO:0045892,GO:0001569,GO:0001782,GO:…	blood vessel remodeling|lymphocyte homeostasis|immune system process|negative regulation of systemic arterial blood pressure|cardiac left ventricle morphogenesis|circumferential growth involved in left ventricle morphogenesis|DNA binding|nucleus|cytoplasm|DNA binding transcription factor activity|cytosol|transcription, DNA-templated|response to xenobiotic stimulus|regulation of transcription, DNA…	rno04659,rno04934	Th17 cell differentiation|Cushing's syndrome
Ahrr	10.6268	5.40687	5.63647	2.48718	5.00181	4.33849	1.96656	6.25359	6.18312	10.1137	8.84364	7.93934	GeneID:498999,Genbank:NM_001024285.1,RGD:1559857	aryl-hydrocarbon receptor repressor	GO:0046983,GO:0003677,GO:0005634,GO:0005654,GO:0005829,GO:0006351,GO:0009410,GO:0033235,GO:0034753,GO:0045892,GO:0000122,GO:0045944,GO:0001191	protein dimerization activity|DNA binding|nucleus|nucleoplasm|cytosol|transcription, DNA-templated|response to xenobiotic stimulus|positive regulation of protein sumoylation|nuclear aryl hydrocarbon receptor complex|negative regulation of transcription, DNA-templated|negative regulation of transcription by RNA polymerase II|positive regulation of transcription by RNA polymerase II|transcriptional…
Ahsa1	47.2507	45.293	41.6214	35.5893	32.7692	34.0117	43.6287	34.2439	36.1446	35.381	37.1944	39.213	GeneID:681996,Genbank:XM_017594356.1,RGD:1589285	activator of Hsp90 ATPase activity 1	GO:0032781,GO:0045296,GO:0051087,GO:0001671,GO:0005829	positive regulation of ATPase activity|cadherin binding|chaperone binding|ATPase activator activity|cytosol
Ahsa2	8.84558	8.34472	7.17657	5.80793	4.65541	5.02611	7.21805	5.11057	7.00176	6.05951	5.85609	7.23343	GeneID:305577,Genbank:NM_001107241.1,RGD:1307171	AHA1, activator of heat shock protein ATPase 2	GO:0001671,GO:0032781,GO:0051087	ATPase activator activity|positive regulation of ATPase activity|chaperone binding
Ahsg	0	0	0	0	0	0	0.0159411	0	0	0	0	0	GeneID:25373,Genbank:NM_012898.4,RGD:2075	alpha-2-HS-glycoprotein	GO:0065003,GO:0032869,GO:0030294,GO:0005576,GO:0072562,GO:0032991,GO:0030308,GO:0045780,GO:0030502,GO:0005615,GO:0046627,GO:0005794,GO:0006953,GO:0008584,GO:0050727,GO:0010951,GO:0031012,GO:0050766,GO:0016021,GO:0001503,GO:0019210,GO:0004866,GO:0061099,GO:0031100,GO:0021987,GO:0004869	protein-containing complex assembly|cellular response to insulin stimulus|receptor signaling protein tyrosine kinase inhibitor activity|extracellular region|blood microparticle|protein-containing complex|negative regulation of cell growth|positive regulation of bone resorption|negative regulation of bone mineralization|extracellular space|negative regulation of insulin receptor signaling pathway|…
Ahsp	11.0758	3.75751	10.5602	19.6166	15.7224	11.8553	1.5537	28.0962	6.20402	28.6726	4.91291	6.99156	GeneID:293522,Genbank:NM_001106299.1,RGD:1306725	alpha hemoglobin stabilizing protein	GO:0005737,GO:0006457,GO:0008150,GO:0030218,GO:0030492,GO:0050821,GO:0003674,GO:0005575	cytoplasm|protein folding|biological_process|erythrocyte differentiation|hemoglobin binding|protein stabilization|molecular_function|cellular_component
Aicda	0.020072	0	0.0275809	0	0.0315872	0.0345393	0.0176883	0.0579548	0	0.0194065	0.0102893	0.0188137	GeneID:399679,Genbank:NM_001100779.1,RGD:1303222	activation-induced cytidine deaminase	GO:0070383,GO:0016446,GO:0003723,GO:0071222,GO:0016554,GO:0004126,GO:0080111,GO:0031625,GO:0005575,GO:0005634,GO:0005737,GO:0042742,GO:0090310,GO:0042802,GO:0008150,GO:0097752,GO:0045190,GO:0008270,GO:0045869,GO:0009972,GO:0000178,GO:0047844,GO:0010529,GO:0000932,GO:0051607,GO:0016445,GO:0003674	DNA cytosine deamination|somatic hypermutation of immunoglobulin genes|RNA binding|cellular response to lipopolysaccharide|cytidine to uridine editing|cytidine deaminase activity|DNA demethylation|ubiquitin protein ligase binding|cellular_component|nucleus|cytoplasm|defense response to bacterium|negative regulation of methylation-dependent chromatin silencing|identical protein binding|biological_…	rno04672,rno05340	Intestinal immune network for IgA production|Primary immunodeficiency
Aida	30.9442	34.1447	34.0489	41.8277	38.0725	37.4466	33.3761	35.4223	31.6108	32.6727	34.8294	35.2617	GeneID:682999,Genbank:NM_001127600.1,RGD:1592746	axin interactor, dorsalization associated	GO:0030178,GO:0035091,GO:0035556,GO:0043496,GO:0043508,GO:0046329,GO:0048264,GO:0005737,GO:0016020,GO:0019904	negative regulation of Wnt signaling pathway|phosphatidylinositol binding|intracellular signal transduction|regulation of protein homodimerization activity|negative regulation of JUN kinase activity|negative regulation of JNK cascade|determination of ventral identity|cytoplasm|membrane|protein domain specific binding
Aif1	6.97276	9.48979	6.20778	23.228	14.495	18.1174	24.2801	16.9918	17.4791	5.72428	6.34429	5.54943	GeneID:29427,Genbank:XM_006256063.3,RGD:61924	allograft inflammatory factor 1	GO:0005737,GO:0005829,GO:0005884,GO:0030335,GO:0006911,GO:0031668,GO:0032587,GO:0006954,GO:0032870,GO:0034097,GO:0048662,GO:0042102,GO:0048678,GO:0051015,GO:0042116,GO:0051017,GO:0051384,GO:0001726,GO:1900087,GO:0051602,GO:0001891,GO:2000406,GO:0071315,GO:0071346,GO:0001934,GO:0005509,GO:0005634,GO:0010629,GO:0014739,GO:0016601,GO:0030027,GO:0042995,GO:0030041,GO:0043066,GO:0043204,GO:0045429,GO:…	cytoplasm|cytosol|actin filament|positive regulation of cell migration|phagocytosis, engulfment|cellular response to extracellular stimulus|ruffle membrane|inflammatory response|cellular response to hormone stimulus|response to cytokine|negative regulation of smooth muscle cell proliferation|positive regulation of T cell proliferation|response to axon injury|actin filament binding|macrophage acti…
Aif1l	6.15976	5.48524	5.55256	5.74696	4.30467	5.62296	2.94903	7.79144	4.47171	3.62406	3.65796	3.67481	GeneID:362107,Genbank:NM_001108578.1,RGD:1305081	allograft inflammatory factor 1-like	GO:0005925,GO:0015629,GO:0032991,GO:0051015,GO:0005509,GO:0005884	focal adhesion|actin cytoskeleton|protein-containing complex|actin filament binding|calcium ion binding|actin filament
Aifm1	13.9221	15.3737	16.4857	17.9663	15.3364	18.5846	31.5801	21.2823	24.3159	15.7447	15.6576	16.0208	GeneID:83533,Genbank:NM_031356.1,RGD:620817	apoptosis inducing factor, mitochondria associated 1	GO:0005739,GO:0005743,GO:0005758,GO:0005829,GO:0048471,GO:0006915,GO:0050660,GO:0006919,GO:0051402,GO:0055114,GO:0070059,GO:0070301,GO:0071392,GO:0071732,GO:0071949,GO:0002931,GO:0003674,GO:0003677,GO:0005634,GO:0005737,GO:0009636,GO:0010942,GO:0016021,GO:0016174,GO:0016491,GO:0016651,GO:0030182,GO:0090650,GO:0032981,GO:1902065,GO:0043525,GO:1902510,GO:0046983,GO:1904045	mitochondrion|mitochondrial inner membrane|mitochondrial intermembrane space|cytosol|perinuclear region of cytoplasm|apoptotic process|flavin adenine dinucleotide binding|activation of cysteine-type endopeptidase activity involved in apoptotic process|neuron apoptotic process|oxidation-reduction process|intrinsic apoptotic signaling pathway in response to endoplasmic reticulum stress|cellular res…	rno04210,rno04217	Apoptosis|Necroptosis
Aifm2	3.04569	3.05016	3.65887	4.33746	4.38831	4.5973	4.3085	4.12698	4.22244	3.91335	3.50604	4.10058	GeneID:361843,Genbank:XM_006256452.2,RGD:1304964	apoptosis inducing factor, mitochondria associated 2	GO:0050660,GO:0005737,GO:0005739,GO:0005741,GO:0005811,GO:0005829,GO:0008637,GO:0022904,GO:0043065,GO:0003677,GO:0004174	flavin adenine dinucleotide binding|cytoplasm|mitochondrion|mitochondrial outer membrane|lipid droplet|cytosol|apoptotic mitochondrial changes|respiratory electron transport chain|positive regulation of apoptotic process|DNA binding|electron-transferring-flavoprotein dehydrogenase activity
Aifm3	1.25964	1.45961	1.02824	0.25947	0.314026	0.304745	0.719883	0.558156	0.968013	0.747607	0.82473	0.865049	GeneID:303786,Genbank:XM_017597951.1,RGD:1306028	apoptosis inducing factor, mitochondria associated 3	GO:0005783,GO:0005829,GO:0016491,GO:0050660,GO:0051537,GO:0055114,GO:0097194,GO:0005634,GO:0005739,GO:0005743	endoplasmic reticulum|cytosol|oxidoreductase activity|flavin adenine dinucleotide binding|2 iron, 2 sulfur cluster binding|oxidation-reduction process|execution phase of apoptosis|nucleus|mitochondrion|mitochondrial inner membrane
Aig1	0.98059	1.04516	0.938675	1.39792	1.18958	1.39903	2.70898	1.6142	1.8455	1.00492	1.07854	1.15923	GeneID:292486,Genbank:NM_001134425.1,RGD:1562920	androgen-induced 1	GO:0016787,GO:0042758,GO:0012505,GO:0016020,GO:0016021	hydrolase activity|long-chain fatty acid catabolic process|endomembrane system|membrane|integral component of membrane
Aim1	4.26198	4.36747	3.93157	8.73559	9.58528	5.8594	12.9729	8.46225	5.58137	6.23688	8.0013	9.10101	GeneID:309866,Genbank:XM_017601841.1,RGD:1308629	absent in melanoma 1	GO:0003674,GO:0005575,GO:0008150	molecular_function|cellular_component|biological_process
Aim1l	2.36863	2.53758	2.03258	3.05058	3.11581	3.12134	7.493	4.5126	3.24893	2.44668	2.38691	2.37574	GeneID:298543,Genbank:XM_008764189.2,RGD:1308621	absent in melanoma 1-like
Aim2	0.0835833	0.251712	0.186425	0.448232	0.391744	0.252636	0.384297	0.373804	0.324305	0.101893	0.122951	0.115812	GeneID:304987,Genbank:XM_006250336.3,RGD:1307283	absent in melanoma 2	GO:0035458,GO:0003690,GO:0035690,GO:0005575,GO:0042802,GO:0005654,GO:0005737,GO:0005739,GO:0050702,GO:0005829,GO:0050718,GO:0008150,GO:0051092,GO:0032088,GO:0070269,GO:0032461,GO:0002218,GO:0097169,GO:0032731,GO:0002230,GO:2001056,GO:0033209,GO:0003674	cellular response to interferon-beta|double-stranded DNA binding|cellular response to drug|cellular_component|identical protein binding|nucleoplasm|cytoplasm|mitochondrion|interleukin-1 beta secretion|cytosol|positive regulation of interleukin-1 beta secretion|biological_process|positive regulation of NF-kappaB transcription factor activity|negative regulation of NF-kappaB transcription factor ac…	rno04621,rno04623	NOD-like receptor signaling pathway|Cytosolic DNA-sensing pathway
Aimp1	13.9174	15.6494	16.9113	16.151	16.0876	15.4884	19.3662	16.2256	17.09	15.3055	16.4261	14.9949	GeneID:114632,Genbank:NM_053757.1,RGD:620466	aminoacyl tRNA synthetase complex-interacting multifunctional protein 1	GO:0017102,GO:0005125,GO:0042803,GO:0048514,GO:0005615,GO:0005829,GO:0006418,GO:0006954,GO:0050900,GO:0007267,GO:0051020,GO:0009986,GO:0051607,GO:0010469,GO:0070094,GO:0016525,GO:0000049,GO:0017101,GO:0001937	methionyl glutamyl tRNA synthetase complex|cytokine activity|protein homodimerization activity|blood vessel morphogenesis|extracellular space|cytosol|tRNA aminoacylation for protein translation|inflammatory response|leukocyte migration|cell-cell signaling|GTPase binding|cell surface|defense response to virus|regulation of signaling receptor activity|positive regulation of glucagon secretion|negat…
Aimp2	17.7529	18.9295	17.2657	18.6777	19.1712	21.0701	24.3655	21.3371	21.7488	18.0152	18.4651	17.7869	GeneID:288480,Genbank:XM_006248863.3,RGD:1560787	aminoacyl tRNA synthetase complex-interacting multifunctional protein 2	GO:0006915,GO:0008285,GO:0017101,GO:0031398,GO:0032947,GO:0060510,GO:0065003,GO:1901216,GO:1903632,GO:0005634,GO:0005829,GO:0006412	apoptotic process|negative regulation of cell proliferation|aminoacyl-tRNA synthetase multienzyme complex|positive regulation of protein ubiquitination|protein-containing complex scaffold activity|Type II pneumocyte differentiation|protein-containing complex assembly|positive regulation of neuron death|positive regulation of aminoacyl-tRNA ligase activity|nucleus|cytosol|translation
Aip	16.4102	15.3024	15.8429	12.5948	12.9123	13.0961	12.8269	13.8847	14.8026	16.353	16.4215	15.1627	GeneID:282827,Genbank:NM_172327.2,RGD:628619	aryl-hydrocarbon receptor-interacting protein	GO:0051082,GO:0005829,GO:0051344,GO:0005886,GO:1903506,GO:0006626,GO:0006805,GO:0010738,GO:0016020,GO:0017162,GO:0022417,GO:0034751,GO:0003712,GO:0036004,GO:0005515	unfolded protein binding|cytosol|negative regulation of cyclic-nucleotide phosphodiesterase activity|plasma membrane|regulation of nucleic acid-templated transcription|protein targeting to mitochondrion|xenobiotic metabolic process|regulation of protein kinase A signaling|membrane|aryl hydrocarbon receptor binding|protein maturation by protein folding|aryl hydrocarbon receptor complex|transcripti…	rno04934	Cushing's syndrome
Aipl1	0.0604571	0.0577592	0.110765	0.0898421	0.0237852	0.0728228	0.119874	0.0981901	0.090676	0.116905	0.0619831	0.0991673	GeneID:59110,Genbank:XM_017597500.1,RGD:70906	aryl hydrocarbon receptor-interacting protein-like 1	GO:0043066,GO:0003674,GO:0005575,GO:0005634,GO:0005654,GO:0005737,GO:0005829,GO:0007601,GO:0007603,GO:0008150,GO:0001895,GO:0018343,GO:0001917,GO:0030823,GO:0001918	negative regulation of apoptotic process|molecular_function|cellular_component|nucleus|nucleoplasm|cytoplasm|cytosol|visual perception|phototransduction, visible light|biological_process|retina homeostasis|protein farnesylation|photoreceptor inner segment|regulation of cGMP metabolic process|farnesylated protein binding	rno04934	Cushing's syndrome
Aire	0.0127496	0.0121806	0.0467175	0.00947323	0.0100319	0.0087756	0	0	0.00956115	0	0.0130714	0	GeneID:294328,Genbank:XM_006256247.2,RGD:1311139	autoimmune regulator	GO:0044212,GO:0006955,GO:0002509,GO:0045060,GO:0006959,GO:0003674,GO:0045182,GO:0008150,GO:0003682,GO:0045893,GO:0003712,GO:0005575,GO:0005622,GO:0008270,GO:0005634,GO:0045944,GO:0016604,GO:0032602,GO:0005737,GO:0097536,GO:0042393,GO:0006355,GO:0000977,GO:2000410,GO:0042802,GO:0006417,GO:0002458	transcription regulatory region DNA binding|immune response|central tolerance induction to self antigen|negative thymic T cell selection|humoral immune response|molecular_function|translation regulator activity|biological_process|chromatin binding|positive regulation of transcription, DNA-templated|transcription cofactor activity|cellular_component|intracellular|zinc ion binding|nucleus|positive …	rno04120,rno05340	Ubiquitin mediated proteolysis|Primary immunodeficiency
Ajap1	0.28269	0.200056	0.335691	0.225605	0.255387	0.245024	0.138399	0.136037	0.0549617	0.0809828	0.15028	0.0294409	GeneID:687031,Genbank:NM_001101014.1,RGD:1590138	adherens junction associated protein 1	GO:0044214,GO:0005913,GO:0044291,GO:0007155,GO:0008013,GO:0009898,GO:0009986,GO:0044877,GO:0016323,GO:0061045,GO:0016324,GO:0030860,GO:0001953	spanning component of plasma membrane|cell-cell adherens junction|cell-cell contact zone|cell adhesion|beta-catenin binding|cytoplasmic side of plasma membrane|cell surface|protein-containing complex binding|basolateral plasma membrane|negative regulation of wound healing|apical plasma membrane|regulation of polarized epithelial cell differentiation|negative regulation of cell-matrix adhesion
Ajuba	10.1609	12.3557	9.84297	13.7574	16.0637	13.0069	29.024	19.0023	13.1494	14.5817	13.6823	7.0353	GeneID:85265,Genbank:NM_053503.1,RGD:620407	ajuba LIM protein	GO:0003714,GO:0005634,GO:0005667,GO:0005794,GO:0030032,GO:0005815,GO:0030334,GO:0005829,GO:0031328,GO:0005886,GO:0031334,GO:0033673,GO:0033674,GO:0034613,GO:0051015,GO:0035195,GO:1900037,GO:0035313,GO:2000637,GO:0035329,GO:0000122,GO:0000932,GO:0001666,GO:0003682,GO:0005911,GO:0005912,GO:0005925,GO:0006351,GO:0006355,GO:0035331,GO:0007010,GO:0016339,GO:0030027,GO:0043087,GO:0043123,GO:0043406,GO:…	transcription corepressor activity|nucleus|transcription factor complex|Golgi apparatus|lamellipodium assembly|microtubule organizing center|regulation of cell migration|cytosol|positive regulation of cellular biosynthetic process|plasma membrane|positive regulation of protein complex assembly|negative regulation of kinase activity|positive regulation of kinase activity|cellular protein localizat…	rno04390,rno04392	Hippo signaling pathway|Hippo signaling pathway - multiple species
Ak1	7.0623	7.47691	7.14469	3.24605	5.05081	4.75034	2.98779	3.34695	4.85397	5.14377	5.31707	5.27555	GeneID:24183,Genbank:NM_024349.3,RGD:2076	adenylate kinase 1	GO:0033574,GO:0010828,GO:0004550,GO:0036126,GO:0014042,GO:0042493,GO:0014823,GO:0005524,GO:0043005,GO:0005737,GO:0005829,GO:0005886,GO:0006165,GO:0016776,GO:0046033,GO:0021549,GO:0006172,GO:0046034,GO:0021772,GO:0007050,GO:0046083,GO:0030017,GO:0007517,GO:0001520,GO:0046103,GO:0030182,GO:0009142,GO:0004017,GO:0048471,GO:0032355	response to testosterone|positive regulation of glucose transmembrane transport|nucleoside diphosphate kinase activity|sperm flagellum|positive regulation of neuron maturation|response to drug|response to activity|ATP binding|neuron projection|cytoplasm|cytosol|plasma membrane|nucleoside diphosphate phosphorylation|phosphotransferase activity, phosphate group as acceptor|AMP metabolic process|cer…	rno00230,rno00730	Purine metabolism|Thiamine metabolism
Ak2	15.0292	15.9076	15.8147	31.4358	24.509	25.7539	36.4069	28.5526	23.788	16.7968	16.107	16.603	GeneID:24184,Genbank:NM_001033967.2,RGD:2077	adenylate kinase 2	GO:0046939,GO:0007420,GO:0004017,GO:0097066,GO:0019205,GO:0097226,GO:0036126,GO:0005524,GO:0005634,GO:0005737,GO:0005739,GO:0005743,GO:0046033,GO:0005758,GO:0046034,GO:0005829,GO:0006119,GO:0001889,GO:0046060,GO:0006172,GO:0046083	nucleotide phosphorylation|brain development|adenylate kinase activity|response to thyroid hormone|nucleobase-containing compound kinase activity|sperm mitochondrial sheath|sperm flagellum|ATP binding|nucleus|cytoplasm|mitochondrion|mitochondrial inner membrane|AMP metabolic process|mitochondrial intermembrane space|ATP metabolic process|cytosol|oxidative phosphorylation|liver development|dATP me…	rno00230,rno00730	Purine metabolism|Thiamine metabolism
Ak3	76.8752	73.4902	79.3262	65.4394	65.2501	68.6714	74.2535	62.06	83.1971	76.4452	88.1211	80.0497	GeneID:26956,Genbank:NM_013218.1,RGD:619885	adenylate kinase 3	GO:0046041,GO:0021549,GO:0004017,GO:0021772,GO:0005524,GO:0046051,GO:0042594,GO:0005525,GO:0005739,GO:0005758,GO:0005759,GO:0042802,GO:0046060,GO:0046033,GO:0046899,GO:0006172,GO:0046034,GO:0001889,GO:0046939,GO:0046039,GO:0006756,GO:0051260,GO:0007517	ITP metabolic process|cerebellum development|adenylate kinase activity|olfactory bulb development|ATP binding|UTP metabolic process|response to starvation|GTP binding|mitochondrion|mitochondrial intermembrane space|mitochondrial matrix|identical protein binding|dATP metabolic process|AMP metabolic process|nucleoside triphosphate adenylate kinase activity|ADP biosynthetic process|ATP metabolic pro…	rno00230	Purine metabolism
Ak4	3.07919	2.06152	2.93508	3.57762	4.42006	4.89759	3.67738	3.32541	3.27649	3.82768	3.31536	5.63858	GeneID:29223,Genbank:XM_017593196.1,RGD:2078	adenylate kinase 4	GO:0042493,GO:0004017,GO:0046033,GO:0004550,GO:0046034,GO:0005524,GO:0005525,GO:0005575,GO:0005739,GO:0046039,GO:0005759,GO:0046899,GO:0006165,GO:0007420,GO:0001889,GO:0009142,GO:0003674	response to drug|adenylate kinase activity|AMP metabolic process|nucleoside diphosphate kinase activity|ATP metabolic process|ATP binding|GTP binding|cellular_component|mitochondrion|GTP metabolic process|mitochondrial matrix|nucleoside triphosphate adenylate kinase activity|nucleoside diphosphate phosphorylation|brain development|liver development|nucleoside triphosphate biosynthetic process|mol…	rno00230,rno00730	Purine metabolism|Thiamine metabolism
Ak5	0.155115	0.181125	0.221037	0.115254	0.162736	0.023726	0.106317	0.0622042	0.103399	0.0999813	0.12369	0.242318	GeneID:301115,Genbank:XM_017596708.1,RGD:1588584	adenylate kinase 5			rno00230,rno00730	Purine metabolism|Thiamine metabolism
Ak6	6.86738	6.92951	6.26738	7.07105	6.82024	7.3824	7.5931	6.55378	5.96009	5.02327	5.88045	6.41275	GeneID:102238592,Genbank:NM_001012463.3,RGD:7387335	adenylate kinase 6	GO:0015937,GO:0004017,GO:0046939,GO:0004140,GO:0005524,GO:0005634,GO:0005654,GO:0005730,GO:0005737,GO:0005829,GO:0015030	coenzyme A biosynthetic process|adenylate kinase activity|nucleotide phosphorylation|dephospho-CoA kinase activity|ATP binding|nucleus|nucleoplasm|nucleolus|cytoplasm|cytosol|Cajal body	rno00230,rno03008	Purine metabolism|Ribosome biogenesis in eukaryotes
Ak7	0.0224758	0.0214728	0.0343154	0.0612335	0.005895	0.041254	0.033011	0.0324476	0.0449468	0.0289741	0.0384052	0.0772448	GeneID:314416,Genbank:XM_008764806.2,RGD:1309600	adenylate kinase 7	GO:0004127,GO:0004550,GO:0005524,GO:0006165,GO:0007283,GO:0007420,GO:0009142,GO:0009165,GO:0019206,GO:0035082,GO:0002437,GO:0003351,GO:0004017	cytidylate kinase activity|nucleoside diphosphate kinase activity|ATP binding|nucleoside diphosphate phosphorylation|spermatogenesis|brain development|nucleoside triphosphate biosynthetic process|nucleotide biosynthetic process|nucleoside kinase activity|axoneme assembly|inflammatory response to antigenic stimulus|epithelial cilium movement|adenylate kinase activity	rno00230,rno00730	Purine metabolism|Thiamine metabolism
Ak8	0.057066	0.0272597	0	0	0.0336766	0.0687381	0	0.0720864	0.0213975	0.0137935	0	0.0133721	GeneID:311833,Genbank:NM_001004266.1,RGD:1303144	adenylate kinase 8	GO:0036126,GO:0004127,GO:0004550,GO:0005524,GO:0005829,GO:0005930,GO:0006165,GO:0009142,GO:0009165,GO:0004017,GO:0019206,GO:0021591	sperm flagellum|cytidylate kinase activity|nucleoside diphosphate kinase activity|ATP binding|cytosol|axoneme|nucleoside diphosphate phosphorylation|nucleoside triphosphate biosynthetic process|nucleotide biosynthetic process|adenylate kinase activity|nucleoside kinase activity|ventricular system development	rno00230,rno00730	Purine metabolism|Thiamine metabolism
Ak9	0.0309151	0.121834	0.0389402	0.00287134	0	0.0398983	0.0681092	0.00836836	0.0898375	0.0261538	0.0316955	0.0398434	GeneID:294521,Genbank:XM_017601822.1,RGD:1559879	adenylate kinase 9	GO:0061566,GO:0005654,GO:0061567,GO:0061568,GO:0005737,GO:0006174,GO:0006186,GO:0006756,GO:0006757,GO:0061569,GO:0019206,GO:0061570,GO:0031965,GO:0061571,GO:0050145,GO:0004550,GO:0061508,GO:0005524,GO:0061565,GO:0005634	CMP phosphorylation|nucleoplasm|dCMP phosphorylation|GDP phosphorylation|cytoplasm|dADP phosphorylation|dGDP phosphorylation|AMP phosphorylation|ATP generation from ADP|UDP phosphorylation|nucleoside kinase activity|dCDP phosphorylation|nuclear membrane|TDP phosphorylation|nucleoside phosphate kinase activity|nucleoside diphosphate kinase activity|CDP phosphorylation|ATP binding|dAMP phosphorylat…	rno00230,rno00240	Purine metabolism|Pyrimidine metabolism
Akain1	0	0	0	0	0	0.00625246	0	0	0	0	0	0	GeneID:100362606,Genbank:XM_017596880.1,RGD:2324352	A kinase (PRKA) anchor inhibitor 1	GO:0008104,GO:0010738,GO:0031333,GO:0034237,GO:0051018,GO:0005829	protein localization|regulation of protein kinase A signaling|negative regulation of protein complex assembly|protein kinase A regulatory subunit binding|protein kinase A binding|cytosol
Akap1	45.7415	37.0388	44.2529	16.2541	15.3659	15.4448	29.6087	22.7528	33.7392	33.7133	31.0266	37.2126	GeneID:114124,Genbank:XM_006247068.1,RGD:620826	A-kinase anchoring protein 1	GO:0042308,GO:0019904,GO:0005741,GO:0045211,GO:0030061,GO:0005743,GO:0048487,GO:0030346,GO:0005759,GO:0071320,GO:0005811,GO:0008017,GO:0010614,GO:0010738,GO:0031594,GO:0071375,GO:0032947,GO:0016021,GO:0034237,GO:0016301,GO:0016310,GO:0003723,GO:0019901,GO:0005739,GO:0035308,GO:0019903	negative regulation of protein import into nucleus|protein domain specific binding|mitochondrial outer membrane|postsynaptic membrane|mitochondrial crista|mitochondrial inner membrane|beta-tubulin binding|protein phosphatase 2B binding|mitochondrial matrix|cellular response to cAMP|lipid droplet|microtubule binding|negative regulation of cardiac muscle hypertrophy|regulation of protein kinase A s…
Akap10	12.7062	12.741	12.6765	9.28619	8.96936	9.41727	13.2839	9.53415	11.7838	12.8939	13.192	14.2534	GeneID:360540,Genbank:NM_001114606.1,RGD:1308869	A-kinase anchoring protein 10	GO:0005739,GO:0005829,GO:0005886,GO:0008104,GO:0008150,GO:0032991,GO:0003674,GO:0051018,GO:0005575	mitochondrion|cytosol|plasma membrane|protein localization|biological_process|protein-containing complex|molecular_function|protein kinase A binding|cellular_component
Akap11	29.1857	27.652	29.4504	17.4096	18.0767	17.7701	18.8353	18.235	22.742	28.2864	28.8288	28.7333	GeneID:498549,Genbank:XM_006252344.2,RGD:2079	A-kinase anchoring protein 11	GO:0032947,GO:0005737,GO:0032991,GO:0005777,GO:0034236,GO:0005829,GO:0005886,GO:0034237,GO:0006928,GO:0042325,GO:0010738,GO:0051018,GO:0016301,GO:0005730,GO:0016310,GO:0019207	protein-containing complex scaffold activity|cytoplasm|protein-containing complex|peroxisome|protein kinase A catalytic subunit binding|cytosol|plasma membrane|protein kinase A regulatory subunit binding|movement of cell or subcellular component|regulation of phosphorylation|regulation of protein kinase A signaling|protein kinase A binding|kinase activity|nucleolus|phosphorylation|kinase regulato…
Akap12	48.1071	66.2876	60.7471	36.6076	54.3156	51.5597	22.7826	51.431	31.2819	43.0644	44.4548	28.9703	GeneID:83425,Genbank:NM_057103.2,RGD:70988	A-kinase anchoring protein 12	GO:0005886,GO:0006605,GO:0007165,GO:0007193,GO:0008179,GO:0010738,GO:0051018,GO:0090036,GO:0005829,GO:0005856	plasma membrane|protein targeting|signal transduction|adenylate cyclase-inhibiting G-protein coupled receptor signaling pathway|adenylate cyclase binding|regulation of protein kinase A signaling|protein kinase A binding|regulation of protein kinase C signaling|cytosol|cytoskeleton
Akap13	29.9631	31.6259	28.1424	25.3556	24.5829	25.8212	36.4794	25.8617	30.0886	24.7551	24.5981	26.3348	GeneID:293024,Genbank:NM_001106271.2,RGD:727893	A-kinase anchoring protein 13	GO:0005884,GO:0005938,GO:0006468,GO:0007186,GO:0035025,GO:0007507,GO:0043123,GO:0008104,GO:0043406,GO:0045859,GO:0046872,GO:0086023,GO:0048471,GO:0051018,GO:1900169,GO:0004691,GO:0005078,GO:0005089,GO:0005634,GO:0005829,GO:0010611,GO:0015629,GO:0017048,GO:0030864,GO:0032947,GO:0051168,GO:0055007,GO:0060297,GO:0060348,GO:0071875	actin filament|cell cortex|protein phosphorylation|G-protein coupled receptor signaling pathway|positive regulation of Rho protein signal transduction|heart development|positive regulation of I-kappaB kinase/NF-kappaB signaling|protein localization|positive regulation of MAP kinase activity|regulation of protein kinase activity|metal ion binding|adenylate cyclase-activating adrenergic receptor si…
Akap14	0.231137	0.220823	0.311377	0.111126	0.288852	0.12166	0.323504	0.117772	0.2651	0.26291	0.250911	0.254879	GeneID:60332,Genbank:NM_021703.1,RGD:708510	A-kinase anchoring protein 14	GO:0034237,GO:0035686,GO:0051018,GO:0005930,GO:0005952,GO:0007283	protein kinase A regulatory subunit binding|sperm fibrous sheath|protein kinase A binding|axoneme|cAMP-dependent protein kinase complex|spermatogenesis
Akap17a	8.99971	9.99117	9.85294	6.60545	7.01354	6.92841	8.96027	7.3904	8.40106	8.51939	8.88931	8.71474	GeneID:288526,Genbank:NM_001127246.1,RGD:1564640	A-kinase anchoring protein 17A	GO:0043484,GO:0051018,GO:0005634,GO:0005829,GO:0016607	regulation of RNA splicing|protein kinase A binding|nucleus|cytosol|nuclear speck
Akap17b	3.28936	3.42992	3.37597	1.12586	0.949614	1.23424	1.26484	1.06902	1.96998	3.00729	2.50197	2.45153	GeneID:313434,Genbank:XM_017602375.1,RGD:1566363	A kinase (PRKA) anchor protein 17B	GO:0003723	RNA binding
Akap2	28.5544	29.4683	31.7971	91.0461	87.9963	94.3194	21.0299	82.7341	31.8286	30.9693	30.9962	30.4814	GeneID:298024,Genbank:XM_006238186.3,RGD:1305135	A-kinase anchoring protein 2	GO:0007178,GO:0008104,GO:0019904,GO:0023052,GO:0032991,GO:0051018,GO:0051291,GO:0007015	transmembrane receptor protein serine/threonine kinase signaling pathway|protein localization|protein domain specific binding|signaling|protein-containing complex|protein kinase A binding|protein heterooligomerization|actin filament organization
Akap3	0.0564583	0.0539388	0.0452543	0.0734122	0.033318	0.0291454	0.0497533	0.0560361	0.0793859	0.075056	0.115767	0.125682	GeneID:312720,Genbank:XM_008763290.1,RGD:1359735	A-kinase anchoring protein 3	GO:0097228,GO:0005737,GO:0006928,GO:0007178,GO:0008104,GO:0008150,GO:0010738,GO:0016301,GO:0016310,GO:0031514,GO:0035686,GO:0001669,GO:0051018,GO:0003674,GO:0005575	sperm principal piece|cytoplasm|movement of cell or subcellular component|transmembrane receptor protein serine/threonine kinase signaling pathway|protein localization|biological_process|regulation of protein kinase A signaling|kinase activity|phosphorylation|motile cilium|sperm fibrous sheath|acrosomal vesicle|protein kinase A binding|molecular_function|cellular_component
Akap4	0	0	0	0	0	0.00670476	0.00858413	0.00703136	0	0	0	0	GeneID:79254,Genbank:NM_024402.1,RGD:620828	A-kinase anchoring protein 4	GO:0048471,GO:0031514,GO:0005929,GO:0051018,GO:0035686,GO:0006928,GO:0007178,GO:0008104,GO:0008150,GO:0010738,GO:0030018,GO:0044458,GO:0097228,GO:0030317,GO:0045184,GO:0003674,GO:0005575,GO:0005737	perinuclear region of cytoplasm|motile cilium|cilium|protein kinase A binding|sperm fibrous sheath|movement of cell or subcellular component|transmembrane receptor protein serine/threonine kinase signaling pathway|protein localization|biological_process|regulation of protein kinase A signaling|Z disc|motile cilium assembly|sperm principal piece|flagellated sperm motility|establishment of protein …
Akap5	8.14166	7.09227	9.33778	1.78088	3.6324	2.343	2.44912	1.58872	4.64389	6.61836	5.756	6.60851	GeneID:171026,Genbank:NM_133515.2,RGD:620829	A-kinase anchoring protein 5	GO:0005886,GO:0006605,GO:0007165,GO:0007193,GO:0007194,GO:0008179,GO:0019904,GO:0021510,GO:0009898,GO:0021766,GO:0010524,GO:0030346,GO:0030425,GO:0031527,GO:0043197,GO:0031698,GO:0043198,GO:0032279,GO:0043267,GO:0032590,GO:0043271,GO:0043624,GO:0044877,GO:0001664,GO:0045296,GO:0001934,GO:0045762,GO:0003779,GO:0048471,GO:0005515,GO:0005516,GO:0005622,GO:0005737,GO:0005856,GO:0010738,GO:0014069,GO:…	plasma membrane|protein targeting|signal transduction|adenylate cyclase-inhibiting G-protein coupled receptor signaling pathway|negative regulation of adenylate cyclase activity|adenylate cyclase binding|protein domain specific binding|spinal cord development|cytoplasmic side of plasma membrane|hippocampus development|positive regulation of calcium ion transport into cytosol|protein phosphatase 2…
Akap6	16.6783	17.5551	20.9694	4.99259	6.90165	6.70693	6.15856	6.24159	8.84952	18.6277	14.2626	15.9296	GeneID:64553,Genbank:XM_017594343.1,RGD:69412	A-kinase anchoring protein 6	GO:0007194,GO:0008179,GO:0010738,GO:0010880,GO:0014701,GO:0031965,GO:0032516,GO:0014704,GO:0032947,GO:0016301,GO:0032991,GO:0034237,GO:0048471,GO:0034629,GO:0034704,GO:0051018,GO:0051281,GO:0051721,GO:0060306,GO:0001934,GO:2000481,GO:0005515,GO:0060316,GO:0005634,GO:0061051,GO:0005635,GO:0005640,GO:0005737,GO:0005901,GO:0016310,GO:0016529,GO:0019899,GO:0030307,GO:0030315,GO:0042383,GO:0043495,GO:…	negative regulation of adenylate cyclase activity|adenylate cyclase binding|regulation of protein kinase A signaling|regulation of release of sequestered calcium ion into cytosol by sarcoplasmic reticulum|junctional sarcoplasmic reticulum membrane|nuclear membrane|positive regulation of phosphoprotein phosphatase activity|intercalated disc|protein-containing complex scaffold activity|kinase activ…
Akap7	8.13191	8.83669	11.37	5.60052	5.10762	5.12262	5.42701	5.33783	7.11466	7.72434	8.67845	8.82561	GeneID:361458,Genbank:NM_001001801.3,RGD:1303071	A-kinase anchoring protein 7	GO:0071320,GO:0032991,GO:0016328,GO:0005737,GO:1901381,GO:0034237,GO:0016529,GO:0005829,GO:1902261,GO:0019901,GO:0008022,GO:0008104,GO:0010738,GO:0019904,GO:0051018,GO:0030315,GO:0016020,GO:0032947,GO:0016208,GO:0005515,GO:0060306,GO:0016324,GO:0005634,GO:0070382	cellular response to cAMP|protein-containing complex|lateral plasma membrane|cytoplasm|positive regulation of potassium ion transmembrane transport|protein kinase A regulatory subunit binding|sarcoplasmic reticulum|cytosol|positive regulation of delayed rectifier potassium channel activity|protein kinase binding|protein C-terminus binding|protein localization|regulation of protein kinase A signal…
Akap8	27.7864	28.9661	27.5055	19.9229	19.5509	18.8044	30.2601	22.4338	25.6559	28.257	29.1916	30.3113	GeneID:116633,Genbank:XM_017594573.1,RGD:620832	A-kinase anchoring protein 8	GO:0034237,GO:0015031,GO:0003677,GO:0016363,GO:0003690,GO:0042826,GO:0005515,GO:0044839,GO:0005634,GO:0005654,GO:0005730,GO:0005739,GO:0045087,GO:0017151,GO:0005794,GO:0051059,GO:0031065,GO:0006351,GO:0071222,GO:0032720,GO:0006355,GO:0000278,GO:0071380,GO:0033127,GO:0007076,GO:0000793,GO:0008270,GO:0001939	protein kinase A regulatory subunit binding|protein transport|DNA binding|nuclear matrix|double-stranded DNA binding|histone deacetylase binding|protein binding|cell cycle G2/M phase transition|nucleus|nucleoplasm|nucleolus|mitochondrion|innate immune response|DEAD/H-box RNA helicase binding|Golgi apparatus|NF-kappaB binding|positive regulation of histone deacetylation|transcription, DNA-template…
Akap8l	19.6085	18.4918	19.4323	8.27428	9.63914	10.4285	11.1716	9.78975	15.1848	15.7336	16.9757	17.5791	GeneID:299569,Genbank:XM_006241054.2,RGD:1359200	A-kinase anchoring protein 8 like	GO:0033127,GO:0005521,GO:0034237,GO:0005634,GO:0042826,GO:0005737,GO:0006397,GO:0007076,GO:0010793,GO:0016301,GO:0044839,GO:0016310,GO:0045944,GO:0016363,GO:0051081,GO:0016607,GO:0000278,GO:0017151,GO:0000785,GO:0031065,GO:0003677	regulation of histone phosphorylation|lamin binding|protein kinase A regulatory subunit binding|nucleus|histone deacetylase binding|cytoplasm|mRNA processing|mitotic chromosome condensation|regulation of mRNA export from nucleus|kinase activity|cell cycle G2/M phase transition|phosphorylation|positive regulation of transcription by RNA polymerase II|nuclear matrix|nuclear envelope disassembly|nuc…	rno05169	Epstein-Barr virus infection
Akap9	14.014	15.2185	14.9185	11.8767	11.3199	12.3611	13.8313	11.4969	14.0598	13.1636	14.351	14.1409	GeneID:246150,Genbank:NM_001037093.2,RGD:620833	A-kinase anchoring protein 9	GO:1903358,GO:0051661,GO:0033138,GO:0005794,GO:0060009,GO:0034237,GO:0005795,GO:0060306,GO:0005801,GO:0060307,GO:0005813,GO:0007020,GO:0007165,GO:0007194,GO:0036064,GO:0007283,GO:0071320,GO:0043025,GO:0008076,GO:0086091,GO:0043231,GO:0015459,GO:0097060,GO:0044307,GO:0031116,GO:0000242,GO:0098909,GO:0044325,GO:0005515,GO:1901018,GO:0051602,GO:0032947,GO:0005737	regulation of Golgi organization|maintenance of centrosome location|positive regulation of peptidyl-serine phosphorylation|Golgi apparatus|Sertoli cell development|protein kinase A regulatory subunit binding|Golgi stack|regulation of membrane repolarization|cis-Golgi network|regulation of ventricular cardiac muscle cell membrane repolarization|centrosome|microtubule nucleation|signal transduction…
Akip1	5.77732	5.24179	6.05794	5.06663	5.89914	5.63555	4.20531	5.28933	5.33164	7.57648	9.32553	6.74337	GeneID:361624,Genbank:XM_006229987.2,RGD:1306959	A-kinase interacting protein 1	GO:1901222,GO:0005654,GO:0034446	regulation of NIK/NF-kappaB signaling|nucleoplasm|substrate adhesion-dependent cell spreading
Akirin1	30.4518	32.5091	32.2491	32.8425	33.4091	35.6719	48.9948	36.2439	35.0677	34.3268	32.7578	35.0946	GeneID:595134,Genbank:NM_001030054.1,RGD:1585989	akirin 1	GO:0031965,GO:0005634,GO:0005654	nuclear membrane|nucleus|nucleoplasm
Akirin2	27.0296	26.1366	26.0703	26.7002	22.6406	25.5283	32.5337	27.302	27.2627	27.4647	27.7118	28.0763	GeneID:297968,Genbank:XM_008763614.2,RGD:1307791	akirin 2	GO:0045087,GO:0005634,GO:0045892,GO:0005654,GO:0045944,GO:0006351,GO:0008284,GO:0009792,GO:0010629,GO:0010950,GO:0017053,GO:0019899,GO:0000122,GO:0032496,GO:0005515,GO:0032755	innate immune response|nucleus|negative regulation of transcription, DNA-templated|nucleoplasm|positive regulation of transcription by RNA polymerase II|transcription, DNA-templated|positive regulation of cell proliferation|embryo development ending in birth or egg hatching|negative regulation of gene expression|positive regulation of endopeptidase activity|transcriptional repressor complex|enzym…
Akna	3.10154	3.05264	3.22432	4.57424	3.26181	3.74686	8.20846	4.56696	5.54003	2.70757	2.12675	2.71581	GeneID:362530,Genbank:XM_006238257.3,RGD:1308202	AT-hook transcription factor	GO:0001650,GO:0005654,GO:0005813,GO:0005829,GO:0006366,GO:0043231,GO:0045944,GO:0000978,GO:0001077	fibrillar center|nucleoplasm|centrosome|cytosol|transcription by RNA polymerase II|intracellular membrane-bounded organelle|positive regulation of transcription by RNA polymerase II|RNA polymerase II proximal promoter sequence-specific DNA binding|transcriptional activator activity, RNA polymerase II proximal promoter sequence-specific DNA binding
Aknad1	0.030564	0.0792574	0.0919952	0.0583966	0.0755831	0.132235	0.0692595	0.0504278	0.15717	0.0633227	0.0581945	0.0982215	GeneID:691416,Genbank:XM_008761422.2,RGD:1583957	AKNA domain containing 1
Akp3	0	0	0	0	0	0	0	0	0	0	0	0	GeneID:64621,Genbank:NM_022680.1,RGD:621650	alkaline phosphatase 3, intestine, not Mn requiring	GO:0005886,GO:0006793,GO:0008270,GO:0009897,GO:0016021,GO:0016311,GO:0031225,GO:0046872,GO:0000287,GO:0004035	plasma membrane|phosphorus metabolic process|zinc ion binding|external side of plasma membrane|integral component of membrane|dephosphorylation|anchored component of membrane|metal ion binding|magnesium ion binding|alkaline phosphatase activity	rno00730,rno00790	Thiamine metabolism|Folate biosynthesis
Akr1a1	190.869	204.696	193.769	283.258	249.92	288.936	259.409	273.159	238.981	206.048	201.888	197.634	GeneID:78959,Genbank:NM_031000.3,RGD:68346	aldo-keto reductase family 1 member A1	GO:0047939,GO:0005575,GO:0055114,GO:0005829,GO:0008106,GO:0008150,GO:0016324,GO:0016491,GO:0019853,GO:0042840,GO:0003674,GO:0046185,GO:0004032	L-glucuronate reductase activity|cellular_component|oxidation-reduction process|cytosol|alcohol dehydrogenase (NADP+) activity|biological_process|apical plasma membrane|oxidoreductase activity|L-ascorbic acid biosynthetic process|D-glucuronate catabolic process|molecular_function|aldehyde catabolic process|alditol:NADP+ 1-oxidoreductase activity	rno00010,rno00040,rno00561	Glycolysis / Gluconeogenesis|Pentose and glucuronate interconversions|Glycerolipid metabolism
Akr1b1	68.3575	81.7281	70.4235	106.305	74.2658	144.583	65.2939	98.8757	105.91	86.1636	84.1959	64.9182	GeneID:24192,Genbank:NM_012498.1,RGD:2092	aldo-keto reductase family 1 member B	GO:0005829,GO:0005996,GO:0006061,GO:0008106,GO:0009414,GO:0010033,GO:0046427,GO:0016491,GO:0048471,GO:0018931,GO:0048661,GO:0031098,GO:0055114,GO:0060135,GO:0070301,GO:0071475,GO:0072001,GO:0001894,GO:0003091,GO:0004032,GO:0005615,GO:0005654,GO:0032838,GO:0033010,GO:0035809,GO:0042415,GO:0042629,GO:0043066,GO:0043220,GO:0072061,GO:0043795,GO:0097066,GO:0044597,GO:0097238,GO:0044598,GO:0097454,GO:…	cytosol|monosaccharide metabolic process|sorbitol biosynthetic process|alcohol dehydrogenase (NADP+) activity|response to water deprivation|response to organic substance|positive regulation of JAK-STAT cascade|oxidoreductase activity|perinuclear region of cytoplasm|naphthalene metabolic process|positive regulation of smooth muscle cell proliferation|stress-activated protein kinase signaling casca…	rno00040,rno00051,rno00052,rno00561,rno00790	Pentose and glucuronate interconversions|Fructose and mannose metabolism|Galactose metabolism|Glycerolipid metabolism|Folate biosynthesis
Akr1b10	2.14414	0.964977	1.68821	0.447662	0.278861	1.39045	0.327931	1.08724	1.10296	1.09649	0.545024	0.747418	GeneID:296972,Genbank:NM_001013084.1,RGD:1308277	aldo-keto reductase family 1 member B10	GO:0016488,GO:0016918,GO:0019751,GO:0042572,GO:0042574,GO:0044597,GO:0044598,GO:0045550,GO:0047718,GO:0052650,GO:0055114,GO:0001758,GO:0070401,GO:0004032,GO:0070402,GO:0005829	farnesol catabolic process|retinal binding|polyol metabolic process|retinol metabolic process|retinal metabolic process|daunorubicin metabolic process|doxorubicin metabolic process|geranylgeranyl reductase activity|indanol dehydrogenase activity|NADP-retinol dehydrogenase activity|oxidation-reduction process|retinal dehydrogenase activity|NADP+ binding|alditol:NADP+ 1-oxidoreductase activity|NADP…	rno00040,rno00051,rno00052,rno00561,rno00790	Pentose and glucuronate interconversions|Fructose and mannose metabolism|Galactose metabolism|Glycerolipid metabolism|Folate biosynthesis
Akr1b7	0.0255444	0.00610112	0.0175502	0.00474502	0	0.00439559	0.0112554	0.0322679	0.0239453	0.0308717	0.0392837	0.0119715	GeneID:116463,Genbank:XM_006236250.3,RGD:620257	aldo-keto reductase family 1, member B7	GO:0004303,GO:0005739,GO:0005829,GO:0008106,GO:0016491,GO:0016616,GO:0055114,GO:0004032,GO:0004033	estradiol 17-beta-dehydrogenase activity|mitochondrion|cytosol|alcohol dehydrogenase (NADP+) activity|oxidoreductase activity|oxidoreductase activity, acting on the CH-OH group of donors, NAD or NADP as acceptor|oxidation-reduction process|alditol:NADP+ 1-oxidoreductase activity|aldo-keto reductase (NADP) activity	rno00040,rno00051,rno00052,rno00561,rno00790	Pentose and glucuronate interconversions|Fructose and mannose metabolism|Galactose metabolism|Glycerolipid metabolism|Folate biosynthesis
Akr1b8	9.3317	10.8049	9.05946	289.99	27.2555	514.09	309.922	513.762	655.324	16.1322	23.2422	13.9519	GeneID:286921,Genbank:NM_173136.1,RGD:708475	aldo-keto reductase family 1, member B8	GO:0008106,GO:0016491,GO:0055114,GO:0004032,GO:0005739,GO:0005829	alcohol dehydrogenase (NADP+) activity|oxidoreductase activity|oxidation-reduction process|alditol:NADP+ 1-oxidoreductase activity|mitochondrion|cytosol	rno00040,rno00051,rno00052,rno00561,rno00790	Pentose and glucuronate interconversions|Fructose and mannose metabolism|Galactose metabolism|Glycerolipid metabolism|Folate biosynthesis
Akr1c1	0	0	0	0.0152235	0	0	0	0	0	0	0	0	GeneID:307092,Genbank:XM_006254188.3,RGD:1306847	aldo-keto reductase family 1, member C1	GO:0047023,GO:0032052,GO:0005496,GO:0042448,GO:0005575,GO:0047045,GO:0042493,GO:0005634,GO:0047086,GO:0005737,GO:0005829,GO:0006693,GO:0008106,GO:0043627,GO:0008202,GO:0048025,GO:0044597,GO:0055114,GO:0008207,GO:0071395,GO:0044598,GO:0016229,GO:0001758,GO:0016491,GO:0004032,GO:0047006,GO:0016655,GO:0004303	androsterone dehydrogenase activity|bile acid binding|steroid binding|progesterone metabolic process|cellular_component|testosterone 17-beta-dehydrogenase (NADP+) activity|response to drug|nucleus|ketosteroid monooxygenase activity|cytoplasm|cytosol|prostaglandin metabolic process|alcohol dehydrogenase (NADP+) activity|response to estrogen|steroid metabolic process|negative regulation of mRNA spl…	rno00140,rno00980	Steroid hormone biosynthesis|Metabolism of xenobiotics by cytochrome P450
Akr1c12	0.434463	0.503389	0.516547	0.206053	0.167291	0.165428	0.081461	0.113434	0.256491	0.41112	0.217976	0.199281	GeneID:361266,Genbank:XM_017600632.1,RGD:1308232	aldo-keto reductase family 1, member C12	GO:0055114,GO:0006693,GO:0008106,GO:0008202,GO:0008207,GO:0016229,GO:0016491,GO:0032052,GO:0042448,GO:0044597,GO:0044598,GO:0004032,GO:0047023,GO:0005496,GO:0047086,GO:0005829	oxidation-reduction process|prostaglandin metabolic process|alcohol dehydrogenase (NADP+) activity|steroid metabolic process|C21-steroid hormone metabolic process|steroid dehydrogenase activity|oxidoreductase activity|bile acid binding|progesterone metabolic process|daunorubicin metabolic process|doxorubicin metabolic process|alditol:NADP+ 1-oxidoreductase activity|androsterone dehydrogenase acti…
Akr1c12l1	0.0207246	0	0	0	0	0	0	0	0	0	0	0	GeneID:498790,Genbank:NM_001135744.1,RGD:1559604	aldo-keto reductase family 1, member C12-like 1	GO:0055114,GO:0006693,GO:0008106,GO:0008202,GO:0008207,GO:0016229,GO:0016491,GO:0032052,GO:0042448,GO:0044597,GO:0044598,GO:0004032,GO:0047023,GO:0005496,GO:0047086,GO:0005829	oxidation-reduction process|prostaglandin metabolic process|alcohol dehydrogenase (NADP+) activity|steroid metabolic process|C21-steroid hormone metabolic process|steroid dehydrogenase activity|oxidoreductase activity|bile acid binding|progesterone metabolic process|daunorubicin metabolic process|doxorubicin metabolic process|alditol:NADP+ 1-oxidoreductase activity|androsterone dehydrogenase acti…
Akr1c13	0.0620716	0	0.0189538	0	0.113962	0.0142414	0.0364667	0.0896109	0.0155162	0	0.0212128	0.0193934	GeneID:364773,Genbank:NM_001014240.3,RGD:1359406	aldo-keto reductase family 1, member C13	GO:0055114,GO:0006693,GO:0008106,GO:0008202,GO:0008207,GO:0016229,GO:0016491,GO:0032052,GO:0042448,GO:0044597,GO:0044598,GO:0004032,GO:0047023,GO:0005496,GO:0047086,GO:0005829	oxidation-reduction process|prostaglandin metabolic process|alcohol dehydrogenase (NADP+) activity|steroid metabolic process|C21-steroid hormone metabolic process|steroid dehydrogenase activity|oxidoreductase activity|bile acid binding|progesterone metabolic process|daunorubicin metabolic process|doxorubicin metabolic process|alditol:NADP+ 1-oxidoreductase activity|androsterone dehydrogenase acti…
Akr1c14	12.1823	27.1223	19.669	6.70799	6.82974	4.41718	1.74452	7.91425	8.18955	9.51734	6.2449	7.63618	GeneID:191574,Genbank:NM_138547.3,RGD:708361	aldo-keto reductase family 1, member C14	GO:0044598,GO:0005829,GO:0047023,GO:0006693,GO:0047042,GO:0008106,GO:0008202,GO:0008207,GO:0016229,GO:0047086,GO:0055114,GO:0016491,GO:0021766,GO:0032052,GO:0004032,GO:0042448,GO:0005496,GO:0044597,GO:0005737	doxorubicin metabolic process|cytosol|androsterone dehydrogenase activity|prostaglandin metabolic process|androsterone dehydrogenase (B-specific) activity|alcohol dehydrogenase (NADP+) activity|steroid metabolic process|C21-steroid hormone metabolic process|steroid dehydrogenase activity|ketosteroid monooxygenase activity|oxidation-reduction process|oxidoreductase activity|hippocampus development…
Akr1c19	1.55061	1.45346	1.53659	0.304339	0.283921	0.194664	0.240635	0.288621	0.351044	1.44262	1.35979	0.923231	GeneID:307096,Genbank:XM_008771867.2,RGD:1562954	aldo-keto reductase family 1, member C19	GO:0055114,GO:0006693,GO:0008106,GO:0008202,GO:0008207,GO:0016229,GO:0016491,GO:0032052,GO:0042448,GO:0044597,GO:0044598,GO:0004032,GO:0047023,GO:0005496,GO:0047086,GO:0005829	oxidation-reduction process|prostaglandin metabolic process|alcohol dehydrogenase (NADP+) activity|steroid metabolic process|C21-steroid hormone metabolic process|steroid dehydrogenase activity|oxidoreductase activity|bile acid binding|progesterone metabolic process|daunorubicin metabolic process|doxorubicin metabolic process|alditol:NADP+ 1-oxidoreductase activity|androsterone dehydrogenase acti…
Akr1c2	0	0	0	0	0	0	0	0	0	0	0	0	GeneID:291283,Genbank:NM_001013057.1,RGD:1311841	aldo-keto reductase family 1, member C2	GO:0008202,GO:0008284,GO:0016229,GO:0016491,GO:0016655,GO:0018636,GO:0047115,GO:0030855,GO:0051897,GO:0031406,GO:0055114,GO:0032052,GO:0070401,GO:0070402,GO:0071395,GO:0071799,GO:0004032,GO:0005496,GO:0005737,GO:0005829,GO:0006693,GO:0007186,GO:0007586,GO:0008106,GO:0033764,GO:0042448,GO:0044597,GO:0044598,GO:0047023,GO:0047024,GO:0072555,GO:0047086,GO:0072582,GO:1902121	steroid metabolic process|positive regulation of cell proliferation|steroid dehydrogenase activity|oxidoreductase activity|oxidoreductase activity, acting on NAD(P)H, quinone or similar compound as acceptor|phenanthrene 9,10-monooxygenase activity|trans-1,2-dihydrobenzene-1,2-diol dehydrogenase activity|epithelial cell differentiation|positive regulation of protein kinase B signaling|carboxylic a…
Akr1c3	0.020862	0.159448	0.0191108	0.0620037	0.0164152	0	0.0183844	0.301178	0.078224	0.463915	0.406382	0.684394	GeneID:171516,Genbank:NM_138510.1,RGD:708428	aldo-keto reductase family 1, member C3	GO:0005634,GO:0005737,GO:0005829,GO:0006693,GO:0010942,GO:0016229,GO:0006709,GO:0016488,GO:0007186,GO:0016491,GO:0016655,GO:0018636,GO:0030216,GO:0047006,GO:0032052,GO:0034614,GO:0047020,GO:0035410,GO:0047023,GO:0047086,GO:0000060,GO:0071560,GO:0047787,GO:0001758,GO:0071799,GO:0048385,GO:0004032,GO:0097211,GO:0050810,GO:1900053,GO:1904322,GO:0004033,GO:1990646,GO:0004745,GO:2000224,GO:0005496,GO:…	nucleus|cytoplasm|cytosol|prostaglandin metabolic process|positive regulation of cell death|steroid dehydrogenase activity|progesterone catabolic process|farnesol catabolic process|G-protein coupled receptor signaling pathway|oxidoreductase activity|oxidoreductase activity, acting on NAD(P)H, quinone or similar compound as acceptor|phenanthrene 9,10-monooxygenase activity|keratinocyte differentia…	rno00140	Steroid hormone biosynthesis
Akr1cl	17.7926	24.4817	22.7656	3.46315	2.86088	2.58247	1.9429	3.55983	3.39377	5.59085	5.35354	8.01229	GeneID:361267,Genbank:NM_001109900.1,RGD:1307514	aldo-keto reductase family 1, member C-like	GO:0008202,GO:0016229,GO:0016491,GO:0047086,GO:0055114,GO:0004032,GO:0005829,GO:0008106	steroid metabolic process|steroid dehydrogenase activity|oxidoreductase activity|ketosteroid monooxygenase activity|oxidation-reduction process|alditol:NADP+ 1-oxidoreductase activity|cytosol|alcohol dehydrogenase (NADP+) activity
Akr1d1	0.0365675	0.0139743	0.0602966	0	0.0057546	0.00503393	0.0193349	0.0105583	0.0274227	0	0.0374905	0.0342751	GeneID:192242,Genbank:NM_138884.1,RGD:620752	aldo-keto reductase family 1, member D1	GO:0055114,GO:0008209,GO:0005829,GO:0016229,GO:0006699,GO:0016491,GO:0006707,GO:0007586,GO:0008106,GO:0030573,GO:0008202,GO:0047086,GO:0008207,GO:0047568,GO:0004032,GO:0047787	oxidation-reduction process|androgen metabolic process|cytosol|steroid dehydrogenase activity|bile acid biosynthetic process|oxidoreductase activity|cholesterol catabolic process|digestion|alcohol dehydrogenase (NADP+) activity|bile acid catabolic process|steroid metabolic process|ketosteroid monooxygenase activity|C21-steroid hormone metabolic process|3-oxo-5-beta-steroid 4-dehydrogenase activit…	rno00120,rno00140	Primary bile acid biosynthesis|Steroid hormone biosynthesis
Akr1e2	3.40275	3.19819	2.6622	2.33699	2.40246	2.59534	2.5448	1.92515	3.18629	2.70307	3.65836	4.05144	GeneID:307091,Genbank:XM_008771865.2,RGD:1309599	aldo-keto reductase family 1, member E2	GO:0005794,GO:0005829,GO:0008106,GO:0016491,GO:0050571,GO:0055114,GO:0004032,GO:0005654	Golgi apparatus|cytosol|alcohol dehydrogenase (NADP+) activity|oxidoreductase activity|1,5-anhydro-D-fructose reductase activity|oxidation-reduction process|alditol:NADP+ 1-oxidoreductase activity|nucleoplasm
Akr7a2	39.7083	38.0526	36.1708	29.0821	26.6942	36.9401	33.3654	35.4441	54.4282	36.8419	43.0613	37.6564	GeneID:171445,Genbank:NM_134407.1,RGD:620311	aldo-keto reductase family 7, member A2	GO:0005739,GO:0005794,GO:0005795,GO:0005829,GO:0019119,GO:0044597,GO:0044598,GO:0055114,GO:0004032,GO:0004033	mitochondrion|Golgi apparatus|Golgi stack|cytosol|phenanthrene-9,10-epoxide hydrolase activity|daunorubicin metabolic process|doxorubicin metabolic process|oxidation-reduction process|alditol:NADP+ 1-oxidoreductase activity|aldo-keto reductase (NADP) activity	rno00980	Metabolism of xenobiotics by cytochrome P450
Akr7a3	0.167497	0.426727	0.289827	4.36973	0.366096	6.64835	1.11524	4.21825	4.35446	0.791722	0.801382	0.767539	GeneID:26760,Genbank:XM_017593183.1,RGD:628635	aldo-keto reductase family 7 member A3	GO:0005829,GO:0042802,GO:0046222,GO:0046223,GO:0055114,GO:0004032,GO:0004033,GO:0005737	cytosol|identical protein binding|aflatoxin metabolic process|aflatoxin catabolic process|oxidation-reduction process|alditol:NADP+ 1-oxidoreductase activity|aldo-keto reductase (NADP) activity|cytoplasm	rno00980	Metabolism of xenobiotics by cytochrome P450
Akt1	42.2619	42.3791	43.2902	54.5557	50.7269	53.2028	53.7692	51.7536	49.9546	44.2524	44.6915	44.5898	GeneID:24185,Genbank:XM_006240631.2,RGD:2081	AKT serine/threonine kinase 1	GO:0032794,GO:0032869,GO:0032880,GO:0004674,GO:0032991,GO:0042981,GO:0033138,GO:0004712,GO:0034405,GO:0005080,GO:0043065,GO:0034614,GO:0005515,GO:0043066,GO:0005829,GO:0005524,GO:0005886,GO:0043154,GO:0005547,GO:0005911,GO:0046622,GO:0043325,GO:0005977,GO:0046889,GO:0043491,GO:0005978,GO:0048009,GO:0043536,GO:0005979,GO:0007173,GO:0006006,GO:0048661,GO:0007249,GO:0006412,GO:0051000,GO:0007281,GO:…	GTPase activating protein binding|cellular response to insulin stimulus|regulation of protein localization|protein serine/threonine kinase activity|protein-containing complex|regulation of apoptotic process|positive regulation of peptidyl-serine phosphorylation|protein serine/threonine/tyrosine kinase activity|response to fluid shear stress|protein kinase C binding|positive regulation of apoptoti…	rno04014,rno04015,rno04010,rno04012,rno04370,rno04371,rno04630,rno04668,rno04066,rno04068,rno04072,rno04071,rno04024,rno04022,rno04151,rno04152,rno04150,rno04140,rno04210,rno04218,rno04510,rno04550,rno04611,rno04620,rno04625,rno04660,rno04662,rno04664,rno04666,rno04062,rno04910,rno04922,rno04923,rno04920,rno04915,rno04914,rno04917,rno04926,rno04919,rno04261,rno04973,rno04725,rno04728,rno04722,rno…	Ras signaling pathway|Rap1 signaling pathway|MAPK signaling pathway|ErbB signaling pathway|VEGF signaling pathway|Apelin signaling pathway|Jak-STAT signaling pathway|TNF signaling pathway|HIF-1 signaling pathway|FoxO signaling pathway|Phospholipase D signaling pathway|Sphingolipid signaling pathway|cAMP signaling pathway|cGMP - PKG signaling pathway|PI3K-Akt signaling pathway|AMPK signaling pathw…
Akt1s1	13.0572	13.6061	12.7022	11.8554	11.8121	11.38	11.6763	11.9691	12.9475	11.7864	11.7776	11.2097	GeneID:292887,Genbank:XM_008759335.2,RGD:1312049	AKT1 substrate 1	GO:0045792,GO:0005737,GO:0048011,GO:0005829,GO:0006469,GO:0008150,GO:0031931,GO:0032007,GO:0032991,GO:0038202,GO:0005515,GO:0042981,GO:0005634,GO:0043523	negative regulation of cell size|cytoplasm|neurotrophin TRK receptor signaling pathway|cytosol|negative regulation of protein kinase activity|biological_process|TORC1 complex|negative regulation of TOR signaling|protein-containing complex|TORC1 signaling|protein binding|regulation of apoptotic process|nucleus|regulation of neuron apoptotic process	rno04152,rno04150,rno04140,rno04211,rno04213,rno04714	AMPK signaling pathway|mTOR signaling pathway|Autophagy - animal|Longevity regulating pathway - mammal|Longevity regulating pathway - multiple species|Thermogenesis
Akt2	19.7555	19.4079	18.1086	16.3217	17.889	17.1734	18.8146	16.2181	17.2899	16.7879	17.33	17.3653	GeneID:25233,Genbank:XM_008759109.2,RGD:2082	AKT serine/threonine kinase 2	GO:2001275,GO:0005080,GO:0005515,GO:0005524,GO:0005634,GO:0006006,GO:0005654,GO:0006417,GO:0005769,GO:0006468,GO:0005829,GO:0006970,GO:0014850,GO:0008284,GO:0018105,GO:0030335,GO:0008286,GO:0031340,GO:0001934,GO:0032869,GO:0031667,GO:0032870,GO:0031982,GO:0004672,GO:0032991,GO:0004674,GO:0033119,GO:0033138,GO:0046326,GO:0035556,GO:0046872,GO:0043066,GO:0050927,GO:0065002,GO:0071407,GO:0071486,GO:…	positive regulation of glucose import in response to insulin stimulus|protein kinase C binding|protein binding|ATP binding|nucleus|glucose metabolic process|nucleoplasm|regulation of translation|early endosome|protein phosphorylation|cytosol|response to osmotic stress|response to muscle activity|positive regulation of cell proliferation|peptidyl-serine phosphorylation|positive regulation of cell …	rno04014,rno04015,rno04010,rno04012,rno04370,rno04371,rno04630,rno04668,rno04066,rno04068,rno04072,rno04071,rno04024,rno04022,rno04151,rno04152,rno04150,rno04140,rno04210,rno04218,rno04510,rno04550,rno04611,rno04620,rno04625,rno04660,rno04662,rno04664,rno04666,rno04062,rno04910,rno04922,rno04923,rno04920,rno04915,rno04914,rno04917,rno04926,rno04919,rno04261,rno04973,rno04725,rno04728,rno04722,rno…	Ras signaling pathway|Rap1 signaling pathway|MAPK signaling pathway|ErbB signaling pathway|VEGF signaling pathway|Apelin signaling pathway|Jak-STAT signaling pathway|TNF signaling pathway|HIF-1 signaling pathway|FoxO signaling pathway|Phospholipase D signaling pathway|Sphingolipid signaling pathway|cAMP signaling pathway|cGMP - PKG signaling pathway|PI3K-Akt signaling pathway|AMPK signaling pathw…
Akt3	29.4816	28.0163	33.8664	27.7798	37.5435	32.1945	17.3714	35.3214	27.1496	40.9125	36.3137	33.8684	GeneID:29414,Genbank:NM_031575.1,RGD:62390	AKT serine/threonine kinase 3	GO:0005524,GO:0005622,GO:0005654,GO:0005829,GO:0006468,GO:0048854,GO:0007165,GO:0048873,GO:0010765,GO:0090050,GO:1905564,GO:1905653,GO:0000002,GO:0001938,GO:0004674,GO:0005080,GO:0016020,GO:0018105,GO:0032008,GO:0032869,GO:0035556,GO:0043536,GO:2000773,GO:0045766,GO:0045793	ATP binding|intracellular|nucleoplasm|cytosol|protein phosphorylation|brain morphogenesis|signal transduction|homeostasis of number of cells within a tissue|positive regulation of sodium ion transport|positive regulation of cell migration involved in sprouting angiogenesis|positive regulation of vascular endothelial cell proliferation|positive regulation of artery morphogenesis|mitochondrial geno…	rno04014,rno04015,rno04010,rno04012,rno04370,rno04371,rno04630,rno04668,rno04066,rno04068,rno04072,rno04071,rno04024,rno04022,rno04151,rno04152,rno04150,rno04140,rno04210,rno04218,rno04510,rno04550,rno04611,rno04620,rno04625,rno04660,rno04662,rno04664,rno04666,rno04062,rno04910,rno04922,rno04923,rno04920,rno04915,rno04914,rno04917,rno04926,rno04919,rno04261,rno04973,rno04725,rno04728,rno04722,rno…	Ras signaling pathway|Rap1 signaling pathway|MAPK signaling pathway|ErbB signaling pathway|VEGF signaling pathway|Apelin signaling pathway|Jak-STAT signaling pathway|TNF signaling pathway|HIF-1 signaling pathway|FoxO signaling pathway|Phospholipase D signaling pathway|Sphingolipid signaling pathway|cAMP signaling pathway|cGMP - PKG signaling pathway|PI3K-Akt signaling pathway|AMPK signaling pathw…
Aktip	46.5936	49.9519	48.7084	28.84	33.0555	31.5007	39.9193	34.5421	43.4516	53.472	58.7824	53.0194	GeneID:291906,Genbank:XM_017601205.1,RGD:1311170	AKT interacting protein	GO:0045022,GO:0005886,GO:0006915,GO:0061630,GO:0007032,GO:0007040,GO:0008333,GO:0070695,GO:0015031,GO:0016567,GO:0030897,GO:0001934,GO:0031625,GO:0005737,GO:0032092,GO:0005829	early endosome to late endosome transport|plasma membrane|apoptotic process|ubiquitin protein ligase activity|endosome organization|lysosome organization|endosome to lysosome transport|FHF complex|protein transport|protein ubiquitination|HOPS complex|positive regulation of protein phosphorylation|ubiquitin protein ligase binding|cytoplasm|positive regulation of protein binding|cytosol
Alad	13.6958	15.2995	14.5502	11.4219	11.553	11.9637	15.9248	13.233	16.8148	17.7936	17.3082	18.1972	GeneID:25374,Genbank:XM_006238235.1,RGD:2083	aminolevulinate dehydratase	GO:0006782,GO:0006783,GO:0006979,GO:0007584,GO:0010212,GO:0008270,GO:0010266,GO:0010269,GO:0010288,GO:0014070,GO:0014823,GO:0031667,GO:0046689,GO:0032025,GO:0051260,GO:0032496,GO:0051384,GO:0033197,GO:0051597,GO:0070541,GO:0070542,GO:0071284,GO:0001666,GO:0071353,GO:0004655,GO:1901799,GO:1904854,GO:0005615,GO:0005829,GO:0005839,GO:0009635,GO:0009636,GO:0009725,GO:0010033,GO:0010035,GO:0010038,GO:…	protoporphyrinogen IX biosynthetic process|heme biosynthetic process|response to oxidative stress|response to nutrient|response to ionizing radiation|zinc ion binding|response to vitamin B1|response to selenium ion|response to lead ion|response to organic cyclic compound|response to activity|response to nutrient levels|response to mercury ion|response to cobalt ion|protein homooligomerization|res…	rno00860	Porphyrin and chlorophyll metabolism
Alas1	14.9683	14.153	13.4728	17.7931	13.8216	15.9929	54.5081	16.5151	20.6355	12.6716	11.8075	12.8181	GeneID:65155,Genbank:NM_024484.2,RGD:68392	5'-aminolevulinate synthase 1	GO:0070541,GO:0031667,GO:0005654,GO:0071407,GO:0032025,GO:0032869,GO:0005739,GO:0005759,GO:0005829,GO:0034698,GO:0006782,GO:0042493,GO:0009635,GO:0042802,GO:0010033,GO:0010045,GO:0001666,GO:0045471,GO:0014070,GO:0003870,GO:0051591,GO:0030170	response to platinum ion|response to nutrient levels|nucleoplasm|cellular response to organic cyclic compound|response to cobalt ion|cellular response to insulin stimulus|mitochondrion|mitochondrial matrix|cytosol|response to gonadotropin|protoporphyrinogen IX biosynthetic process|response to drug|response to herbicide|identical protein binding|response to organic substance|response to nickel cat…	rno00260,rno00860	Glycine, serine and threonine metabolism|Porphyrin and chlorophyll metabolism
Alas2	4.55875	4.39374	4.40947	6.0871	11.1937	4.42063	2.45768	3.19388	5.53024	2.68344	4.63258	7.94268	GeneID:25748,Genbank:NM_013197.1,RGD:2084	5'-aminolevulinate synthase 2	GO:0070542,GO:0030218,GO:0006783,GO:0001666,GO:0097421,GO:0003870,GO:1901423,GO:0032025,GO:0006879,GO:0042493,GO:0005739,GO:0042541,GO:0007595,GO:0005743,GO:0010288,GO:0016594,GO:0050662,GO:0030170,GO:0005759,GO:0060135,GO:0006782	response to fatty acid|erythrocyte differentiation|heme biosynthetic process|response to hypoxia|liver regeneration|5-aminolevulinate synthase activity|response to benzene|response to cobalt ion|cellular iron ion homeostasis|response to drug|mitochondrion|hemoglobin biosynthetic process|lactation|mitochondrial inner membrane|response to lead ion|glycine binding|coenzyme binding|pyridoxal phosphat…	rno00260,rno00860	Glycine, serine and threonine metabolism|Porphyrin and chlorophyll metabolism
Alb	0	0	0	0	0	0.00866158	0	0.109002	0	0	0.0129015	0.04718	GeneID:24186,Genbank:NM_134326.2,RGD:2085	albumin	GO:0005615,GO:0005737,GO:0005783,GO:0005794,GO:0019825,GO:0007584,GO:0008144,GO:0019836,GO:0019899,GO:0030170,GO:0046010,GO:0046689,GO:0051087,GO:0032991,GO:0051659,GO:0003677,GO:0070062,GO:0070541,GO:0005504,GO:0005576,GO:0005604,GO:0008270,GO:0009267,GO:0010033,GO:0015643,GO:0042311,GO:0042802,GO:0043066,GO:0043209	extracellular space|cytoplasm|endoplasmic reticulum|Golgi apparatus|oxygen binding|response to nutrient|drug binding|hemolysis by symbiont of host erythrocytes|enzyme binding|pyridoxal phosphate binding|positive regulation of circadian sleep/wake cycle, non-REM sleep|response to mercury ion|chaperone binding|protein-containing complex|maintenance of mitochondrion location|DNA binding|extracellula…	rno04918	Thyroid hormone synthesis
Alcam	57.3464	72.2637	67.4516	36.775	58.1023	44.2272	58.9165	42.1669	48.076	75.5514	72.8238	61.3935	GeneID:79559,Genbank:XM_017598077.1,RGD:619972	activated leukocyte cell adhesion molecule	GO:0042101,GO:0005887,GO:0007155,GO:0042802,GO:0007157,GO:0007411,GO:0008045,GO:0009897,GO:0043025,GO:0030424,GO:0048846,GO:1990138,GO:0030425,GO:0031226,GO:0001772,GO:0031290,GO:0002250	T cell receptor complex|integral component of plasma membrane|cell adhesion|identical protein binding|heterophilic cell-cell adhesion via plasma membrane cell adhesion molecules|axon guidance|motor neuron axon guidance|external side of plasma membrane|neuronal cell body|axon|axon extension involved in axon guidance|neuron projection extension|dendrite|intrinsic component of plasma membrane|immuno…	rno04514	Cell adhesion molecules (CAMs)
Aldh16a1	11.4063	12.4541	11.8839	16.3417	12.8286	14.7602	21.952	16.1746	17.7491	14.9189	15.0355	13.4928	GeneID:361571,Genbank:XM_006229100.1,RGD:1566295	aldehyde dehydrogenase 16 family, member A1	GO:0004029,GO:0016491,GO:0055114	aldehyde dehydrogenase (NAD) activity|oxidoreductase activity|oxidation-reduction process
Aldh18a1	0.460271	0.31796	1.14166	1.45215	1.6158	2.10555	0.811219	1.26251	0.281444	0.205389	0.130677	0.30531	GeneID:361755,Genbank:XM_006231346.2,RGD:1311431	aldehyde dehydrogenase 18 family, member A1	GO:0042802,GO:0005524,GO:0055114,GO:0005739,GO:0055129,GO:0005829,GO:0006536,GO:0006561,GO:0006592,GO:0009266,GO:0016310,GO:0017084,GO:0004349,GO:0019240,GO:0004350,GO:0031966	identical protein binding|ATP binding|oxidation-reduction process|mitochondrion|L-proline biosynthetic process|cytosol|glutamate metabolic process|proline biosynthetic process|ornithine biosynthetic process|response to temperature stimulus|phosphorylation|delta1-pyrroline-5-carboxylate synthetase activity|glutamate 5-kinase activity|citrulline biosynthetic process|glutamate-5-semialdehyde dehydro…	rno00330	Arginine and proline metabolism
Aldh1a1	25.9281	16.9941	17.5763	53.0464	11.3204	84.8495	5.4731	33.436	78.9697	14.1782	20.722	14.8529	GeneID:24188,Genbank:NM_022407.3,RGD:2087	aldehyde dehydrogenase 1 family, member A1	GO:0004028,GO:0004029,GO:0042493,GO:0005634,GO:0042572,GO:0005737,GO:0005829,GO:0042573,GO:0042802,GO:0042904,GO:0042905,GO:0043065,GO:0001523,GO:0001758,GO:0001822,GO:0001889,GO:0002072,GO:0002138,GO:0006979,GO:0007494,GO:0014070,GO:0018479,GO:0032355,GO:0044849,GO:0032526,GO:0045471,GO:0048048,GO:0051287,GO:0051289,GO:0055114	3-chloroallyl aldehyde dehydrogenase activity|aldehyde dehydrogenase (NAD) activity|response to drug|nucleus|retinol metabolic process|cytoplasm|cytosol|retinoic acid metabolic process|identical protein binding|9-cis-retinoic acid biosynthetic process|9-cis-retinoic acid metabolic process|positive regulation of apoptotic process|retinoid metabolic process|retinal dehydrogenase activity|kidney dev…	rno00830	Retinol metabolism
Aldh1a2	12.7585	15.4803	13.25	60.6145	40.8358	52.6133	29.7646	32.2698	18.4036	8.0609	10.5266	8.004	GeneID:116676,Genbank:NM_053896.2,RGD:620250	aldehyde dehydrogenase 1 family, member A2	GO:0002138,GO:0003007,GO:0004028,GO:0004029,GO:0005737,GO:0005829,GO:0030324,GO:0007494,GO:0030326,GO:0008284,GO:0030900,GO:0008285,GO:0030902,GO:0031016,GO:0031076,GO:0032355,GO:0048471,GO:0033189,GO:0048566,GO:0034097,GO:0048738,GO:0035115,GO:0055114,GO:0060324,GO:0071300,GO:0001568,GO:0001758,GO:0001822,GO:0001889,GO:0001936,GO:0009855,GO:0009952,GO:0009954,GO:0010628,GO:0014032,GO:0016331,GO:…	retinoic acid biosynthetic process|heart morphogenesis|3-chloroallyl aldehyde dehydrogenase activity|aldehyde dehydrogenase (NAD) activity|cytoplasm|cytosol|lung development|midgut development|embryonic limb morphogenesis|positive regulation of cell proliferation|forebrain development|negative regulation of cell proliferation|hindbrain development|pancreas development|embryonic camera-type eye de…	rno00830	Retinol metabolism
Aldh1a3	2.83607	2.86613	2.3277	35.5678	13.1958	21.4165	342.139	95.9924	104.682	4.64402	4.53796	3.81071	GeneID:266603,Genbank:NM_153300.1,RGD:628662	aldehyde dehydrogenase 1 family, member A3	GO:0002138,GO:0004028,GO:0004029,GO:0007626,GO:0021768,GO:0004030,GO:0021983,GO:0031076,GO:0042472,GO:0051289,GO:0042493,GO:0042572,GO:0042573,GO:0055114,GO:0060013,GO:0060166,GO:0001758,GO:0060324,GO:0001822,GO:0002072,GO:0005634,GO:0005737,GO:0005829,GO:0042574,GO:0005886,GO:0042803,GO:0043065,GO:0043584,GO:0070324,GO:0048048,GO:0050885,GO:0070384,GO:0070403	retinoic acid biosynthetic process|3-chloroallyl aldehyde dehydrogenase activity|aldehyde dehydrogenase (NAD) activity|locomotory behavior|nucleus accumbens development|aldehyde dehydrogenase [NAD(P)+] activity|pituitary gland development|embryonic camera-type eye development|inner ear morphogenesis|protein homotetramerization|response to drug|retinol metabolic process|retinoic acid metabolic pro…	rno00010,rno00340,rno00350,rno00360,rno00410,rno00980,rno00982,rno05204	Glycolysis / Gluconeogenesis|Histidine metabolism|Tyrosine metabolism|Phenylalanine metabolism|beta-Alanine metabolism|Metabolism of xenobiotics by cytochrome P450|Drug metabolism - cytochrome P450|Chemical carcinogenesis
Aldh1a7	0	0.0359592	0	0.475431	0.029616	1.16582	0.0995066	0.54338	1.9476	0.254736	0.154356	0.176396	GeneID:29651,Genbank:XM_017590530.1,RGD:620252	aldehyde dehydrogenase family 1, subfamily A7	GO:0004028,GO:0004029,GO:0005829,GO:0006068,GO:0018479,GO:0035106,GO:0042802,GO:0051287,GO:0051289,GO:0001758,GO:0055114	3-chloroallyl aldehyde dehydrogenase activity|aldehyde dehydrogenase (NAD) activity|cytosol|ethanol catabolic process|benzaldehyde dehydrogenase (NAD+) activity|operant conditioning|identical protein binding|NAD binding|protein homotetramerization|retinal dehydrogenase activity|oxidation-reduction process	rno00830	Retinol metabolism
Aldh1b1	2.64755	1.34683	2.30983	0.791987	1.92089	1.60933	1.02011	1.82009	1.59867	2.08327	1.70383	1.86924	GeneID:298079,Genbank:NM_001011975.1,RGD:1306737	aldehyde dehydrogenase 1 family, member B1	GO:0005654,GO:0005739,GO:0005759,GO:0006068,GO:0008150,GO:0016620,GO:0043231,GO:0055114,GO:0003674,GO:0004029,GO:0005575	nucleoplasm|mitochondrion|mitochondrial matrix|ethanol catabolic process|biological_process|oxidoreductase activity, acting on the aldehyde or oxo group of donors, NAD or NADP as acceptor|intracellular membrane-bounded organelle|oxidation-reduction process|molecular_function|aldehyde dehydrogenase (NAD) activity|cellular_component	rno00010,rno00053,rno00620,rno00071,rno00561,rno00280,rno00310,rno00330,rno00340,rno00380,rno00410	Glycolysis / Gluconeogenesis|Ascorbate and aldarate metabolism|Pyruvate metabolism|Fatty acid degradation|Glycerolipid metabolism|Valine, leucine and isoleucine degradation|Lysine degradation|Arginine and proline metabolism|Histidine metabolism|Tryptophan metabolism|beta-Alanine metabolism
Aldh1l1	1.05627	1.23148	1.25461	1.36348	1.38051	3.48115	1.61712	2.5652	2.21524	1.92998	1.18388	1.87103	GeneID:64392,Genbank:NM_022547.1,RGD:621294	aldehyde dehydrogenase 1 family, member L1	GO:0033721,GO:0005737,GO:0044877,GO:0005739,GO:0046654,GO:0005829,GO:0006730,GO:0009058,GO:0055114,GO:0009258,GO:0016155,GO:0016620,GO:0004029,GO:0016742,GO:0032991,GO:0004030	aldehyde dehydrogenase (NADP+) activity|cytoplasm|protein-containing complex binding|mitochondrion|tetrahydrofolate biosynthetic process|cytosol|one-carbon metabolic process|biosynthetic process|oxidation-reduction process|10-formyltetrahydrofolate catabolic process|formyltetrahydrofolate dehydrogenase activity|oxidoreductase activity, acting on the aldehyde or oxo group of donors, NAD or NADP as…	rno00670	One carbon pool by folate
Aldh1l2	3.92759	5.14781	2.39365	21.3988	14.8071	14.2039	4.65539	8.83323	5.02053	1.39655	1.69721	1.99281	GeneID:299699,Genbank:NM_001191778.1,RGD:1309458	aldehyde dehydrogenase 1 family, member L2	GO:0005634,GO:0005739,GO:0006730,GO:0009058,GO:0009258,GO:0016021,GO:0016155,GO:0016742,GO:0055114,GO:0004029	nucleus|mitochondrion|one-carbon metabolic process|biosynthetic process|10-formyltetrahydrofolate catabolic process|integral component of membrane|formyltetrahydrofolate dehydrogenase activity|hydroxymethyl-, formyl- and related transferase activity|oxidation-reduction process|aldehyde dehydrogenase (NAD) activity	rno00670	One carbon pool by folate
Aldh2	152.019	134.113	152.304	92.6236	75.8888	103.804	102.851	114.107	132.174	151.611	127.994	143.366	GeneID:29539,Genbank:XM_006249385.3,RGD:69219	aldehyde dehydrogenase 2 family (mitochondrial)	GO:0035094,GO:0004029,GO:0042802,GO:0043066,GO:0005515,GO:0005739,GO:0005759,GO:0055093,GO:0006068,GO:0055114,GO:0032355,GO:0070404,GO:0032496,GO:0071398,GO:0032570,GO:0001889,GO:0032870,GO:0033574	response to nicotine|aldehyde dehydrogenase (NAD) activity|identical protein binding|negative regulation of apoptotic process|protein binding|mitochondrion|mitochondrial matrix|response to hyperoxia|ethanol catabolic process|oxidation-reduction process|response to estradiol|NADH binding|response to lipopolysaccharide|cellular response to fatty acid|response to progesterone|liver development|cellu…	rno00010,rno00053,rno00620,rno00071,rno00561,rno00280,rno00310,rno00330,rno00340,rno00380,rno00410	Glycolysis / Gluconeogenesis|Ascorbate and aldarate metabolism|Pyruvate metabolism|Fatty acid degradation|Glycerolipid metabolism|Valine, leucine and isoleucine degradation|Lysine degradation|Arginine and proline metabolism|Histidine metabolism|Tryptophan metabolism|beta-Alanine metabolism
Aldh3a1	39.0112	31.0282	17.4312	62.3363	12.2922	113.733	1.6691	70.7012	9.60129	17.5174	31.506	6.34428	GeneID:25375,Genbank:NM_031972.1,RGD:2088	aldehyde dehydrogenase 3 family, member A1	GO:0042493,GO:0007584,GO:0004028,GO:0008106,GO:0004029,GO:0051384,GO:0051591,GO:0004030,GO:0005737,GO:0005783,GO:0008284,GO:0005829,GO:0055114,GO:0014070,GO:0005886,GO:0016021,GO:0006081,GO:0001666,GO:0016620,GO:0018479,GO:0007568	response to drug|response to nutrient|3-chloroallyl aldehyde dehydrogenase activity|alcohol dehydrogenase (NADP+) activity|aldehyde dehydrogenase (NAD) activity|response to glucocorticoid|response to cAMP|aldehyde dehydrogenase [NAD(P)+] activity|cytoplasm|endoplasmic reticulum|positive regulation of cell proliferation|cytosol|oxidation-reduction process|response to organic cyclic compound|plasma…	rno00010,rno00340,rno00350,rno00360,rno00410,rno00980,rno00982,rno05204	Glycolysis / Gluconeogenesis|Histidine metabolism|Tyrosine metabolism|Phenylalanine metabolism|beta-Alanine metabolism|Metabolism of xenobiotics by cytochrome P450|Drug metabolism - cytochrome P450|Chemical carcinogenesis
Aldh3a2	38.2784	35.078	39.3322	18.5171	23.1033	21.1212	15.999	20.5625	24.5666	34.964	35.9628	35.5242	GeneID:65183,Genbank:XM_006246529.2,RGD:61866	aldehyde dehydrogenase 3 family, member A2	GO:0043231,GO:0007422,GO:0004029,GO:0046292,GO:0008544,GO:0004030,GO:0046577,GO:0005634,GO:0005777,GO:0005783,GO:0005829,GO:0016021,GO:0006081,GO:0050061,GO:0052814,GO:0033306,GO:0006714,GO:0000302,GO:0055114,GO:0007417,GO:0004028,GO:0042406	intracellular membrane-bounded organelle|peripheral nervous system development|aldehyde dehydrogenase (NAD) activity|formaldehyde metabolic process|epidermis development|aldehyde dehydrogenase [NAD(P)+] activity|long-chain-alcohol oxidase activity|nucleus|peroxisome|endoplasmic reticulum|cytosol|integral component of membrane|cellular aldehyde metabolic process|long-chain-aldehyde dehydrogenase a…	rno00010,rno00053,rno00620,rno00071,rno00561,rno00280,rno00310,rno00330,rno00340,rno00380,rno00410	Glycolysis / Gluconeogenesis|Ascorbate and aldarate metabolism|Pyruvate metabolism|Fatty acid degradation|Glycerolipid metabolism|Valine, leucine and isoleucine degradation|Lysine degradation|Arginine and proline metabolism|Histidine metabolism|Tryptophan metabolism|beta-Alanine metabolism
Aldh3b1	1.24383	1.37882	1.05244	1.5803	1.25513	1.59463	1.80733	1.9259	1.65905	1.39537	1.89823	1.43284	GeneID:309147,Genbank:XM_008760134.1,RGD:1359546	aldehyde dehydrogenase 3 family, member B1	GO:0055114,GO:0004030,GO:0005737,GO:0005829,GO:0005886,GO:0006068,GO:0034599,GO:0046185,GO:0004028,GO:0004029	oxidation-reduction process|aldehyde dehydrogenase [NAD(P)+] activity|cytoplasm|cytosol|plasma membrane|ethanol catabolic process|cellular response to oxidative stress|aldehyde catabolic process|3-chloroallyl aldehyde dehydrogenase activity|aldehyde dehydrogenase (NAD) activity	rno00010,rno00340,rno00350,rno00360,rno00410,rno00980,rno00982,rno05204	Glycolysis / Gluconeogenesis|Histidine metabolism|Tyrosine metabolism|Phenylalanine metabolism|beta-Alanine metabolism|Metabolism of xenobiotics by cytochrome P450|Drug metabolism - cytochrome P450|Chemical carcinogenesis
Aldh3b2	16.2956	18.2428	13.5774	12.2788	9.95975	8.02364	4.02804	6.37432	9.22866	30.5822	20.4226	29.3311	GeneID:688800,Genbank:XM_008760187.1,RGD:1584166	aldehyde dehydrogenase 3 family, member B2	GO:0004029,GO:0004030,GO:0005811	aldehyde dehydrogenase (NAD) activity|aldehyde dehydrogenase [NAD(P)+] activity|lipid droplet	rno00010,rno00340,rno00350,rno00360,rno00410,rno00980,rno00982,rno05204	Glycolysis / Gluconeogenesis|Histidine metabolism|Tyrosine metabolism|Phenylalanine metabolism|beta-Alanine metabolism|Metabolism of xenobiotics by cytochrome P450|Drug metabolism - cytochrome P450|Chemical carcinogenesis
Aldh4a1	39.4717	42.2717	47.2656	26.4725	26.9163	35.3485	52.1726	38.0493	58.1482	41.4757	48.5222	45.2932	GeneID:641316,Genbank:NM_001134698.1,RGD:1624206	aldehyde dehydrogenase 4 family, member A1	GO:0005759,GO:0010133,GO:0016021,GO:0016620,GO:0042802,GO:0055114,GO:0003842,GO:0004029	mitochondrial matrix|proline catabolic process to glutamate|integral component of membrane|oxidoreductase activity, acting on the aldehyde or oxo group of donors, NAD or NADP as acceptor|identical protein binding|oxidation-reduction process|1-pyrroline-5-carboxylate dehydrogenase activity|aldehyde dehydrogenase (NAD) activity	rno00250,rno00330	Alanine, aspartate and glutamate metabolism|Arginine and proline metabolism
[truncated: 22,030 more rows]

## Sheet: SSCI-1 vs. sham
gene_id	BaseMean	lfcSE	stat	FoldChange	log2FoldChange	pValue	qValue	Regulation	Expression_NC1	Expression_NC2	Expression_NC3	Expression_SCI1	Expression_SCI2	Expression_SCI3	Dbxref	product	GO_id	GO_term	pathway	pathway_description
[truncated: 3,255 more rows]

## Sheet: SSCI-2 vs. sham
gene_id	BaseMean	lfcSE	stat	FoldChange	log2FoldChange	pValue	qValue	Regulation	Expression_NC1	Expression_NC2	Expression_NC3	Expression_SCI4	Expression_SCI5	Expression_SCI6	Dbxref	product	GO_id	GO_term	pathway	pathway_description
[truncated: 3,449 more rows]

## Sheet: SSCI-3 vs. sham
gene_id	BaseMean	lfcSE	stat	FoldChange	log2FoldChange	pValue	qValue	Regulation	Expression_NC1	Expression_NC2	Expression_NC3	Expression_SCI7	Expression_SCI8	Expression_SCI9	Dbxref	product	GO_id	GO_term	pathway	pathway_description
[truncated: 884 more rows]

[truncated: 3 more sheets: SSCI-3 vs. SSCI-2, SSCI-3 vs. SSCI-1, SSCI-2 vs. SSCI-1]
