# Supplementary material for: Expression profiles of circular RNAs and interaction networks of competing endogenous RNAs in neurogenic bladder of rats following suprasacral spinal cord injury
Source: PeerJ. 2023 Sep 18;11:e16042. doi: 10.7717/peerj.16042 (PMC10512963; doi:10.7717/peerj.16042)
Supplement: Supplemental Information 12 [file peerj-11-16042-s012.xlsx]

## Sheet: circRNA annotation
id	genomic_length	circRNA_length	type	best-transcript	transcript_position	gene	Dbxref	product	GO_id	GO_term	pathway	pathway_description	circAtlas_id	circAtlas_data	CIRCpedia_id	transcript_CIRCpedia	genesymbol_CIRCpedia
circRNA_0001|Chr1:1399137_1474869_-	75733	72717	sense-overlapping	XM_008758633.2	Chr1:1470754_1489340_-	Raet1d	GeneID:502217,Genbank:XM_008758633.2,RGD:1565376	retinoic acid early transcript delta, transcript variant X1	GO:0046703,GO:0001913,GO:0005886,GO:0042267	natural killer cell lectin-like receptor binding|T cell mediated cytotoxicity|plasma membrane|natural killer cell mediated cytotoxicity	rno04650	Natural killer cell mediated cytotoxicity
circRNA_0002|Chr1:1399137_1474886_-	75750	72734	sense-overlapping	XM_008758633.2	Chr1:1470754_1489340_-	Raet1d	GeneID:502217,Genbank:XM_008758633.2,RGD:1565376	retinoic acid early transcript delta, transcript variant X1	GO:0046703,GO:0001913,GO:0005886,GO:0042267	natural killer cell lectin-like receptor binding|T cell mediated cytotoxicity|plasma membrane|natural killer cell mediated cytotoxicity	rno04650	Natural killer cell mediated cytotoxicity
circRNA_0003|Chr1:1742558_1750895_-	8338	449	sense-overlapping	NM_013073.3	Chr1:1734863_1767759_-	Pcmt1	GeneID:25604,Genbank:NM_013073.3,RGD:3268	protein-L-isoaspartate (D-aspartate) O-methyltransferase 1	GO:0071456,GO:0010667,GO:0004719,GO:0016323,GO:0005515,GO:0031526,GO:0005615,GO:0005737,GO:0005829,GO:0043005,GO:0043204,GO:0006479,GO:0045296,GO:0045471,GO:0046498,GO:0007568,GO:0046500,GO:0008757	cellular response to hypoxia|negative regulation of cardiac muscle cell apoptotic process|protein-L-isoaspartate (D-aspartate) O-methyltransferase activity|basolateral plasma membrane|protein binding|brush border membrane|extracellular space|cytoplasm|cytosol|neuron projection|perikaryon|protein methylation|cadherin binding|response to ethanol|S-adenosylhomocysteine metabolic process|aging|S-aden…			rno-Pcmt1_0003	http://159.226.67.237:8080/new/circ_detail.php?ID=rno-Pcmt1_0003	RNO_CIRCpedia_1574	NM_013073	Pcmt1
circRNA_0004|Chr1:1802693_1807003_+	4311	2097	sense-overlapping	NM_001134543.2	Chr1:1784078_1817310_+	Lats1	GeneID:308265,Genbank:NM_001134543.2,RGD:1564085	large tumor suppressor kinase 1	GO:0043254,GO:0030331,GO:0000819,GO:0045736,GO:0030833,GO:0000922,GO:0046620,GO:0033138,GO:0051220,GO:0001827,GO:0001828,GO:0004674,GO:0033146,GO:0005524,GO:0060644,GO:0034613,GO:0006468,GO:0090090,GO:0035329,GO:0009755,GO:2000058,GO:0018105,GO:0000082,GO:0035556,GO:0019901,GO:0000086,GO:0043065,GO:0030216,GO:0000287	regulation of protein complex assembly|estrogen receptor binding|sister chromatid segregation|negative regulation of cyclin-dependent protein serine/threonine kinase activity|regulation of actin filament polymerization|spindle pole|regulation of organ growth|positive regulation of peptidyl-serine phosphorylation|cytoplasmic sequestering of protein|inner cell mass cell fate commitment|inner cell m…	rno04390,rno04392	Hippo signaling pathway|Hippo signaling pathway - multiple species	rno-Lats1_0001	http://159.226.67.237:8080/new/circ_detail.php?ID=rno-Lats1_0001	RNO_CIRCpedia_1577	NM_001134543	Lats1
circRNA_0005|Chr1:1841452_1846589_+	5138	514	sense-overlapping	NM_001004217.4	Chr1:1826170_1867786_+	Katna1	GeneID:292464,Genbank:NM_001004217.4,RGD:1303062	katanin catalytic subunit A1	GO:0005634,GO:0005737,GO:0005811,GO:0005813,GO:0016887,GO:0005819,GO:0030424,GO:0005874,GO:0030426,GO:0030496,GO:0097431,GO:0031122,GO:0000278,GO:0000922,GO:0001578,GO:0001764,GO:0005524,GO:0005886,GO:0008017,GO:0008104,GO:0008568,GO:0031463,GO:0043025,GO:0010977,GO:0046982,GO:0051013,GO:0051301,GO:0070840	nucleus|cytoplasm|lipid droplet|centrosome|ATPase activity|spindle|axon|microtubule|growth cone|midbody|mitotic spindle pole|cytoplasmic microtubule organization|mitotic cell cycle|spindle pole|microtubule bundle formation|neuron migration|ATP binding|plasma membrane|microtubule binding|protein localization|microtubule-severing ATPase activity|Cul3-RING ubiquitin ligase complex|neuronal cell body…			rno-Katna1_0001	http://159.226.67.237:8080/new/circ_detail.php?ID=rno-Katna1_0001	RNO_CIRCpedia_5052	ENSRNOT00000020417.6	Katna1
circRNA_0006|Chr1:2375315_2377265_-	1951	256	sense-overlapping	XM_017589330.1	Chr1:2330631_2627654_-	Ust	GeneID:361450,Genbank:XM_017589330.1,RGD:1304743	uronyl-2-sulfotransferase, transcript variant X1	GO:0030010,GO:0050770,GO:0008146,GO:0016021	establishment of cell polarity|regulation of axonogenesis|sulfotransferase activity|integral component of membrane	rno00532	Glycosaminoglycan biosynthesis - chondroitin sulfate / dermatan sulfate	rno-Ust_0002	http://159.226.67.237:8080/new/circ_detail.php?ID=rno-Ust_0002	RNO_CIRCpedia_5054	ENSRNOT00000022003.5	Ust
circRNA_0007|Chr1:2839790_2849731_-	9942	343	sense-overlapping	XM_003748645.4	Chr1:2782905_2950749_-	Sash1	GeneID:365037,Genbank:XM_003748645.4,RGD:1566017	SAM and SH3 domain containing 1, transcript variant X1	GO:1901224,GO:0010595,GO:1902498,GO:0016020,GO:0019901,GO:0031435,GO:0031666,GO:0032947,GO:0043507,GO:0045766,GO:1900044,GO:0000209,GO:1900745,GO:0008022,GO:0009966	positive regulation of NIK/NF-kappaB signaling|positive regulation of endothelial cell migration|regulation of protein autoubiquitination|membrane|protein kinase binding|mitogen-activated protein kinase kinase kinase binding|positive regulation of lipopolysaccharide-mediated signaling pathway|protein-containing complex scaffold activity|positive regulation of JUN kinase activity|positive regulati…			rno-Sash1_0001	http://159.226.67.237:8080/new/circ_detail.php?ID=rno-Sash1_0001
circRNA_0008|Chr1:2876047_2910994_-	34948	230	sense-overlapping	XM_003748645.4	Chr1:2782905_2950749_-	Sash1	GeneID:365037,Genbank:XM_003748645.4,RGD:1566017	SAM and SH3 domain containing 1, transcript variant X1	GO:1901224,GO:0010595,GO:1902498,GO:0016020,GO:0019901,GO:0031435,GO:0031666,GO:0032947,GO:0043507,GO:0045766,GO:1900044,GO:0000209,GO:1900745,GO:0008022,GO:0009966	positive regulation of NIK/NF-kappaB signaling|positive regulation of endothelial cell migration|regulation of protein autoubiquitination|membrane|protein kinase binding|mitogen-activated protein kinase kinase kinase binding|positive regulation of lipopolysaccharide-mediated signaling pathway|protein-containing complex scaffold activity|positive regulation of JUN kinase activity|positive regulati…			rno-RF00340_0001	http://159.226.67.237:8080/new/circ_detail.php?ID=rno-RF00340_0001
circRNA_0009|Chr1:3941650_3949063_-	7414	407	sense-overlapping	XM_006227623.3	Chr1:3858917_4011684_-	Stxbp5	GeneID:81022,Genbank:XM_006227623.3,RGD:708517	syntaxin binding protein 5, transcript variant X1	GO:0030054,GO:0005829,GO:0030141,GO:0005886,GO:0030659,GO:0005892,GO:0006887,GO:0008021,GO:0015031,GO:0017075,GO:0043547,GO:0045921,GO:0017137,GO:0017157,GO:0050708,GO:0005096,GO:0019905,GO:0005737	cell junction|cytosol|secretory granule|plasma membrane|cytoplasmic vesicle membrane|acetylcholine-gated channel complex|exocytosis|synaptic vesicle|protein transport|syntaxin-1 binding|positive regulation of GTPase activity|positive regulation of exocytosis|Rab GTPase binding|regulation of exocytosis|regulation of protein secretion|GTPase activator activity|syntaxin binding|cytoplasm			rno-Stxbp5_0001	http://159.226.67.237:8080/new/circ_detail.php?ID=rno-Stxbp5_0001
circRNA_0010|Chr1:6534185_6575208_-	41024	686	sense-overlapping	XM_008758599.2	Chr1:6451809_6626093_-	Utrn	GeneID:25600,Genbank:XM_008758599.2,RGD:3947	utrophin, transcript variant X8	GO:0030864,GO:0005654,GO:0031527,GO:0031594,GO:0005737,GO:0005886,GO:0007528,GO:0008270,GO:0014894,GO:0016010,GO:0042383,GO:0017166,GO:0045202,GO:0019901,GO:0045211,GO:0030054,GO:0001954,GO:0051015,GO:0030175,GO:0003779,GO:0070938,GO:0030426,GO:0005178	cortical actin cytoskeleton|nucleoplasm|filopodium membrane|neuromuscular junction|cytoplasm|plasma membrane|neuromuscular junction development|zinc ion binding|response to denervation involved in regulation of muscle adaptation|dystrophin-associated glycoprotein complex|sarcolemma|vinculin binding|synapse|protein kinase binding|postsynaptic membrane|cell junction|positive regulation of cell-matr…			rno-Utrn_0012	http://159.226.67.237:8080/new/circ_detail.php?ID=rno-Utrn_0012
circRNA_0011|Chr1:6601452_6613874_-	12423	330	sense-overlapping	XM_008758599.2	Chr1:6451809_6626093_-	Utrn	GeneID:25600,Genbank:XM_008758599.2,RGD:3947	utrophin, transcript variant X8	GO:0030864,GO:0005654,GO:0031527,GO:0031594,GO:0005737,GO:0005886,GO:0007528,GO:0008270,GO:0014894,GO:0016010,GO:0042383,GO:0017166,GO:0045202,GO:0019901,GO:0045211,GO:0030054,GO:0001954,GO:0051015,GO:0030175,GO:0003779,GO:0070938,GO:0030426,GO:0005178	cortical actin cytoskeleton|nucleoplasm|filopodium membrane|neuromuscular junction|cytoplasm|plasma membrane|neuromuscular junction development|zinc ion binding|response to denervation involved in regulation of muscle adaptation|dystrophin-associated glycoprotein complex|sarcolemma|vinculin binding|synapse|protein kinase binding|postsynaptic membrane|cell junction|positive regulation of cell-matr…			rno-Utrn_0002	http://159.226.67.237:8080/new/circ_detail.php?ID=rno-Utrn_0002
circRNA_0012|Chr1:6702976_6754239_-	51264	1923	sense-overlapping	XM_017588826.1	Chr1:6451809_6832770_-	Utrn	GeneID:25600,Genbank:XM_017588826.1,RGD:3947	utrophin, transcript variant X6	GO:0030864,GO:0005654,GO:0031527,GO:0031594,GO:0005737,GO:0005886,GO:0007528,GO:0008270,GO:0014894,GO:0016010,GO:0042383,GO:0017166,GO:0045202,GO:0019901,GO:0045211,GO:0030054,GO:0001954,GO:0051015,GO:0030175,GO:0003779,GO:0070938,GO:0030426,GO:0005178	cortical actin cytoskeleton|nucleoplasm|filopodium membrane|neuromuscular junction|cytoplasm|plasma membrane|neuromuscular junction development|zinc ion binding|response to denervation involved in regulation of muscle adaptation|dystrophin-associated glycoprotein complex|sarcolemma|vinculin binding|synapse|protein kinase binding|postsynaptic membrane|cell junction|positive regulation of cell-matr…			rno-Utrn_0013	http://159.226.67.237:8080/new/circ_detail.php?ID=rno-Utrn_0013
circRNA_0013|Chr1:6800132_6819230_-	19099	1452	sense-overlapping	XM_017588826.1	Chr1:6451809_6832770_-	Utrn	GeneID:25600,Genbank:XM_017588826.1,RGD:3947	utrophin, transcript variant X6	GO:0030864,GO:0005654,GO:0031527,GO:0031594,GO:0005737,GO:0005886,GO:0007528,GO:0008270,GO:0014894,GO:0016010,GO:0042383,GO:0017166,GO:0045202,GO:0019901,GO:0045211,GO:0030054,GO:0001954,GO:0051015,GO:0030175,GO:0003779,GO:0070938,GO:0030426,GO:0005178	cortical actin cytoskeleton|nucleoplasm|filopodium membrane|neuromuscular junction|cytoplasm|plasma membrane|neuromuscular junction development|zinc ion binding|response to denervation involved in regulation of muscle adaptation|dystrophin-associated glycoprotein complex|sarcolemma|vinculin binding|synapse|protein kinase binding|postsynaptic membrane|cell junction|positive regulation of cell-matr…			rno-Utrn_0022	http://159.226.67.237:8080/new/circ_detail.php?ID=rno-Utrn_0022
circRNA_0014|Chr1:6804365_6816920_-	12556	805	sense-overlapping	XM_017588826.1	Chr1:6451809_6832770_-	Utrn	GeneID:25600,Genbank:XM_017588826.1,RGD:3947	utrophin, transcript variant X6	GO:0030864,GO:0005654,GO:0031527,GO:0031594,GO:0005737,GO:0005886,GO:0007528,GO:0008270,GO:0014894,GO:0016010,GO:0042383,GO:0017166,GO:0045202,GO:0019901,GO:0045211,GO:0030054,GO:0001954,GO:0051015,GO:0030175,GO:0003779,GO:0070938,GO:0030426,GO:0005178	cortical actin cytoskeleton|nucleoplasm|filopodium membrane|neuromuscular junction|cytoplasm|plasma membrane|neuromuscular junction development|zinc ion binding|response to denervation involved in regulation of muscle adaptation|dystrophin-associated glycoprotein complex|sarcolemma|vinculin binding|synapse|protein kinase binding|postsynaptic membrane|cell junction|positive regulation of cell-matr…			rno-Utrn_0028	http://159.226.67.237:8080/new/circ_detail.php?ID=rno-Utrn_0028	RNO_CIRCpedia_1584	ENSRNOT00000086574.1	Utrn
circRNA_0015|Chr1:6804365_6824947_-	20583	1315	sense-overlapping	XM_017588826.1	Chr1:6451809_6832770_-	Utrn	GeneID:25600,Genbank:XM_017588826.1,RGD:3947	utrophin, transcript variant X6	GO:0030864,GO:0005654,GO:0031527,GO:0031594,GO:0005737,GO:0005886,GO:0007528,GO:0008270,GO:0014894,GO:0016010,GO:0042383,GO:0017166,GO:0045202,GO:0019901,GO:0045211,GO:0030054,GO:0001954,GO:0051015,GO:0030175,GO:0003779,GO:0070938,GO:0030426,GO:0005178	cortical actin cytoskeleton|nucleoplasm|filopodium membrane|neuromuscular junction|cytoplasm|plasma membrane|neuromuscular junction development|zinc ion binding|response to denervation involved in regulation of muscle adaptation|dystrophin-associated glycoprotein complex|sarcolemma|vinculin binding|synapse|protein kinase binding|postsynaptic membrane|cell junction|positive regulation of cell-matr…			rno-Utrn_0024	http://159.226.67.237:8080/new/circ_detail.php?ID=rno-Utrn_0024	RNO_CIRCpedia_1585	ENSRNOT00000086574.1	Utrn
circRNA_0016|Chr1:6810305_6829781_-	19477	1429	sense-overlapping	XM_017588826.1	Chr1:6451809_6832770_-	Utrn	GeneID:25600,Genbank:XM_017588826.1,RGD:3947	utrophin, transcript variant X6	GO:0030864,GO:0005654,GO:0031527,GO:0031594,GO:0005737,GO:0005886,GO:0007528,GO:0008270,GO:0014894,GO:0016010,GO:0042383,GO:0017166,GO:0045202,GO:0019901,GO:0045211,GO:0030054,GO:0001954,GO:0051015,GO:0030175,GO:0003779,GO:0070938,GO:0030426,GO:0005178	cortical actin cytoskeleton|nucleoplasm|filopodium membrane|neuromuscular junction|cytoplasm|plasma membrane|neuromuscular junction development|zinc ion binding|response to denervation involved in regulation of muscle adaptation|dystrophin-associated glycoprotein complex|sarcolemma|vinculin binding|synapse|protein kinase binding|postsynaptic membrane|cell junction|positive regulation of cell-matr…			rno-Utrn_0016	http://159.226.67.237:8080/new/circ_detail.php?ID=rno-Utrn_0016
circRNA_0017|Chr1:6837861_6841171_-	3311	344	sense-overlapping	XM_006227637.3	Chr1:6451809_6905681_-	Utrn	GeneID:25600,Genbank:XM_006227637.3,RGD:3947	utrophin, transcript variant X1	GO:0030864,GO:0005654,GO:0031527,GO:0031594,GO:0005737,GO:0005886,GO:0007528,GO:0008270,GO:0014894,GO:0016010,GO:0042383,GO:0017166,GO:0045202,GO:0019901,GO:0045211,GO:0030054,GO:0001954,GO:0051015,GO:0030175,GO:0003779,GO:0070938,GO:0030426,GO:0005178	cortical actin cytoskeleton|nucleoplasm|filopodium membrane|neuromuscular junction|cytoplasm|plasma membrane|neuromuscular junction development|zinc ion binding|response to denervation involved in regulation of muscle adaptation|dystrophin-associated glycoprotein complex|sarcolemma|vinculin binding|synapse|protein kinase binding|postsynaptic membrane|cell junction|positive regulation of cell-matr…			rno-Utrn_0033	http://159.226.67.237:8080/new/circ_detail.php?ID=rno-Utrn_0033
circRNA_0018|Chr1:7392046_7443859_-	51814	1204	sense-overlapping	XM_017589099.1	Chr1:7352050_7481719_-	Phactr2	GeneID:308291,Genbank:XM_017589099.1,RGD:1303141	phosphatase and actin regulator 2, transcript variant X3	GO:0003779,GO:0004864,GO:0032515	actin binding|protein phosphatase inhibitor activity|negative regulation of phosphoprotein phosphatase activity			rno-Phactr2_0007	http://159.226.67.237:8080/new/circ_detail.php?ID=rno-Phactr2_0007
circRNA_0019|Chr1:7730011_7740859_+	10849	426	sense-overlapping	NM_001115028.1	Chr1:7726447_7743112_+	Adat2	GeneID:361453,Genbank:NM_001115028.1,RGD:1309642	adenosine deaminase, tRNA-specific 2
circRNA_0020|Chr1:8155769_8159996_+	4228	4228	intronic	NM_024137.1	Chr1:8129354_8333890_+	Hivep2	GeneID:29721,Genbank:NM_024137.1,RGD:61988	human immunodeficiency virus type I enhancer binding protein 2	GO:0003700,GO:0005634,GO:0005654,GO:0006355,GO:0006366,GO:0007165,GO:0007275,GO:0043565,GO:0044212,GO:0045944,GO:0000978,GO:0046872,GO:0001077,GO:0003676	DNA binding transcription factor activity|nucleus|nucleoplasm|regulation of transcription, DNA-templated|transcription by RNA polymerase II|signal transduction|multicellular organism development|sequence-specific DNA binding|transcription regulatory region DNA binding|positive regulation of transcription by RNA polymerase II|RNA polymerase II proximal promoter sequence-specific DNA binding|metal …			rno-intergenic_000351	http://159.226.67.237:8080/new/circ_detail.php?ID=rno-intergenic_000351
circRNA_0021|Chr1:8654486_8656474_-	1989	966	sense-overlapping	XM_218313.9	Chr1:8593342_8751539_-	Adgrg6	GeneID:308376,Genbank:XM_218313.9,RGD:1308551	adhesion G protein-coupled receptor G6, transcript variant X1	GO:0007005,GO:0007166,GO:0007189,GO:0014037,GO:0016021,GO:0019933,GO:0022011,GO:0042552,GO:0043236,GO:0060347,GO:0004930,GO:0005622,GO:0005886	mitochondrion organization|cell surface receptor signaling pathway|adenylate cyclase-activating G-protein coupled receptor signaling pathway|Schwann cell differentiation|integral component of membrane|cAMP-mediated signaling|myelination in peripheral nervous system|myelination|laminin binding|heart trabecula formation|G-protein coupled receptor activity|intracellular|plasma membrane
circRNA_0022|Chr1:8846801_8860029_-	13229	408	sense-overlapping	XM_006227646.2	Chr1:8830405_8878191_-	Vta1	GeneID:292640,Genbank:XM_006227646.2,RGD:1305031	vesicle trafficking 1, transcript variant X1	GO:0005829,GO:0008022,GO:0043231,GO:0046755,GO:0071985,GO:0005654,GO:0005737	cytosol|protein C-terminus binding|intracellular membrane-bounded organelle|viral budding|multivesicular body sorting pathway|nucleoplasm|cytoplasm	rno04144	Endocytosis	rno-Vta1_0001	http://159.226.67.237:8080/new/circ_detail.php?ID=rno-Vta1_0001	RNO_CIRCpedia_1587	ENSRNOT00000075850.2	Vta1
circRNA_0023|Chr1:11910012_11910514_+	503	503	antisense	NM_001025002.1	Chr1:11907746_11914539_-	LOC310926	GeneID:310926,Genbank:NM_001025002.1,RGD:1560890	hypothetical protein LOC310926
circRNA_0024|Chr1:12086530_12134025_+	47496	5633	sense-overlapping	NM_001170534.2	Chr1:12006663_12128849_+	Mcc	GeneID:307449,Genbank:NM_001170534.2,RGD:1561988	mutated in colorectal cancers	GO:0005737,GO:0005829,GO:0005886,GO:0010633,GO:0045184,GO:0050680,GO:0090090,GO:0005509,GO:0005634,GO:0005654	cytoplasm|cytosol|plasma membrane|negative regulation of epithelial cell migration|establishment of protein localization|negative regulation of epithelial cell proliferation|negative regulation of canonical Wnt signaling pathway|calcium ion binding|nucleus|nucleoplasm			rno-AABR07000411_0002	http://159.226.67.237:8080/new/circ_detail.php?ID=rno-AABR07000411_0002
circRNA_0025|Chr1:12086530_12158667_+	72138	30275	sense-overlapping	NM_001170534.2	Chr1:12006663_12128849_+	Mcc	GeneID:307449,Genbank:NM_001170534.2,RGD:1561988	mutated in colorectal cancers	GO:0005737,GO:0005829,GO:0005886,GO:0010633,GO:0045184,GO:0050680,GO:0090090,GO:0005509,GO:0005634,GO:0005654	cytoplasm|cytosol|plasma membrane|negative regulation of epithelial cell migration|establishment of protein localization|negative regulation of epithelial cell proliferation|negative regulation of canonical Wnt signaling pathway|calcium ion binding|nucleus|nucleoplasm			rno-Mcc_0003	http://159.226.67.237:8080/new/circ_detail.php?ID=rno-Mcc_0003
circRNA_0026|Chr1:12128638_12134025_+	5388	5388	sense-overlapping	NM_001170534.2	Chr1:12006663_12128849_+	Mcc	GeneID:307449,Genbank:NM_001170534.2,RGD:1561988	mutated in colorectal cancers	GO:0005737,GO:0005829,GO:0005886,GO:0010633,GO:0045184,GO:0050680,GO:0090090,GO:0005509,GO:0005634,GO:0005654	cytoplasm|cytosol|plasma membrane|negative regulation of epithelial cell migration|establishment of protein localization|negative regulation of epithelial cell proliferation|negative regulation of canonical Wnt signaling pathway|calcium ion binding|nucleus|nucleoplasm			rno-AABR07000411_0001	http://159.226.67.237:8080/new/circ_detail.php?ID=rno-AABR07000411_0001
circRNA_0027|Chr1:12128638_12158667_+	30030	30030	sense-overlapping	NM_001170534.2	Chr1:12006663_12128849_+	Mcc	GeneID:307449,Genbank:NM_001170534.2,RGD:1561988	mutated in colorectal cancers	GO:0005737,GO:0005829,GO:0005886,GO:0010633,GO:0045184,GO:0050680,GO:0090090,GO:0005509,GO:0005634,GO:0005654	cytoplasm|cytosol|plasma membrane|negative regulation of epithelial cell migration|establishment of protein localization|negative regulation of epithelial cell proliferation|negative regulation of canonical Wnt signaling pathway|calcium ion binding|nucleus|nucleoplasm			rno-Mcc_0002	http://159.226.67.237:8080/new/circ_detail.php?ID=rno-Mcc_0002
circRNA_0028|Chr1:13262070_13268495_+	6426	982	sense-overlapping	NM_001106264.1	Chr1:13262049_13298347_+	Reps1	GeneID:292944,Genbank:NM_001106264.1,RGD:1307131	RALBP1 associated Eps domain containing 1	GO:0005886,GO:0005905,GO:0017124	plasma membrane|clathrin-coated pit|SH3 domain binding			rno-Reps1_0001	http://159.226.67.237:8080/new/circ_detail.php?ID=rno-Reps1_0001	RNO_CIRCpedia_1588	ENSRNOT00000089607.1	Reps1
circRNA_0029|Chr1:13696687_13704515_+	7829	3847	sense-overlapping	XM_017589823.1	Chr1:13472694_13705364_+	Nhsl1	GeneID:308631,Genbank:XM_017589823.1,RGD:1308124	NHS-like 1, transcript variant X1	GO:0016020,GO:0030154,GO:0097475	membrane|cell differentiation|motor neuron migration			rno-Nhsl1_0005	http://159.226.67.237:8080/new/circ_detail.php?ID=rno-Nhsl1_0005
circRNA_0030|Chr1:13696687_13704603_+	7917	3935	sense-overlapping	XM_017589823.1	Chr1:13472694_13705364_+	Nhsl1	GeneID:308631,Genbank:XM_017589823.1,RGD:1308124	NHS-like 1, transcript variant X1	GO:0016020,GO:0030154,GO:0097475	membrane|cell differentiation|motor neuron migration
circRNA_0031|Chr1:13696687_13704812_+	8126	4144	sense-overlapping	XM_017589823.1	Chr1:13472694_13705364_+	Nhsl1	GeneID:308631,Genbank:XM_017589823.1,RGD:1308124	NHS-like 1, transcript variant X1	GO:0016020,GO:0030154,GO:0097475	membrane|cell differentiation|motor neuron migration			rno-Nhsl1_0006	http://159.226.67.237:8080/new/circ_detail.php?ID=rno-Nhsl1_0006
circRNA_0032|Chr1:15474913_15494771_+	19859	805	sense-overlapping	NM_001277694.1	Chr1:15412603_15613752_+	Map3k5	GeneID:365057,Genbank:NM_001277694.1,RGD:1306565	mitogen-activated protein kinase kinase kinase 5	GO:0004709,GO:0005515,GO:0005524,GO:0005622,GO:0005737,GO:0034198,GO:0005829,GO:0034976,GO:0006468,GO:0007254,GO:0038066,GO:0042060,GO:0042802,GO:0042803,GO:1900745,GO:0043065,GO:1901216,GO:0043280,GO:1902170,GO:0043507,GO:1902911,GO:1904707,GO:1990604,GO:0000165,GO:0000186,GO:0000187,GO:0000287,GO:0001934,GO:0002931,GO:0004672,GO:0008631,GO:0009897,GO:0010666,GO:0010941,GO:0019901,GO:0019903,GO:…	MAP kinase kinase kinase activity|protein binding|ATP binding|intracellular|cytoplasm|cellular response to amino acid starvation|cytosol|response to endoplasmic reticulum stress|protein phosphorylation|JNK cascade|p38MAPK cascade|wound healing|identical protein binding|protein homodimerization activity|positive regulation of p38MAPK cascade|positive regulation of apoptotic process|positive regula…	rno04141,rno04010,rno04668,rno04071,rno04210,rno04530,rno04722,rno04714,rno05014,rno05418,rno04932,rno01524	Protein processing in endoplasmic reticulum|MAPK signaling pathway|TNF signaling pathway|Sphingolipid signaling pathway|Apoptosis|Tight junction|Neurotrophin signaling pathway|Thermogenesis|Amyotrophic lateral sclerosis (ALS)|Fluid shear stress and atherosclerosis|Non-alcoholic fatty liver disease (NAFLD)|Platinum drug resistance	rno-Map3k5_0003	http://159.226.67.237:8080/new/circ_detail.php?ID=rno-Map3k5_0003	RNO_CIRCpedia_5058	ENSRNOT00000051496.6	Map3k5
circRNA_0033|Chr1:15474913_15526167_+	51255	1232	sense-overlapping	NM_001277694.1	Chr1:15412603_15613752_+	Map3k5	GeneID:365057,Genbank:NM_001277694.1,RGD:1306565	mitogen-activated protein kinase kinase kinase 5	GO:0004709,GO:0005515,GO:0005524,GO:0005622,GO:0005737,GO:0034198,GO:0005829,GO:0034976,GO:0006468,GO:0007254,GO:0038066,GO:0042060,GO:0042802,GO:0042803,GO:1900745,GO:0043065,GO:1901216,GO:0043280,GO:1902170,GO:0043507,GO:1902911,GO:1904707,GO:1990604,GO:0000165,GO:0000186,GO:0000187,GO:0000287,GO:0001934,GO:0002931,GO:0004672,GO:0008631,GO:0009897,GO:0010666,GO:0010941,GO:0019901,GO:0019903,GO:…	MAP kinase kinase kinase activity|protein binding|ATP binding|intracellular|cytoplasm|cellular response to amino acid starvation|cytosol|response to endoplasmic reticulum stress|protein phosphorylation|JNK cascade|p38MAPK cascade|wound healing|identical protein binding|protein homodimerization activity|positive regulation of p38MAPK cascade|positive regulation of apoptotic process|positive regula…	rno04141,rno04010,rno04668,rno04071,rno04210,rno04530,rno04722,rno04714,rno05014,rno05418,rno04932,rno01524	Protein processing in endoplasmic reticulum|MAPK signaling pathway|TNF signaling pathway|Sphingolipid signaling pathway|Apoptosis|Tight junction|Neurotrophin signaling pathway|Thermogenesis|Amyotrophic lateral sclerosis (ALS)|Fluid shear stress and atherosclerosis|Non-alcoholic fatty liver disease (NAFLD)|Platinum drug resistance	rno-Map3k5_0016	http://159.226.67.237:8080/new/circ_detail.php?ID=rno-Map3k5_0016
circRNA_0034|Chr1:15488392_15494771_+	6380	641	sense-overlapping	NM_001277694.1	Chr1:15412603_15613752_+	Map3k5	GeneID:365057,Genbank:NM_001277694.1,RGD:1306565	mitogen-activated protein kinase kinase kinase 5	GO:0004709,GO:0005515,GO:0005524,GO:0005622,GO:0005737,GO:0034198,GO:0005829,GO:0034976,GO:0006468,GO:0007254,GO:0038066,GO:0042060,GO:0042802,GO:0042803,GO:1900745,GO:0043065,GO:1901216,GO:0043280,GO:1902170,GO:0043507,GO:1902911,GO:1904707,GO:1990604,GO:0000165,GO:0000186,GO:0000187,GO:0000287,GO:0001934,GO:0002931,GO:0004672,GO:0008631,GO:0009897,GO:0010666,GO:0010941,GO:0019901,GO:0019903,GO:…	MAP kinase kinase kinase activity|protein binding|ATP binding|intracellular|cytoplasm|cellular response to amino acid starvation|cytosol|response to endoplasmic reticulum stress|protein phosphorylation|JNK cascade|p38MAPK cascade|wound healing|identical protein binding|protein homodimerization activity|positive regulation of p38MAPK cascade|positive regulation of apoptotic process|positive regula…	rno04141,rno04010,rno04668,rno04071,rno04210,rno04530,rno04722,rno04714,rno05014,rno05418,rno04932,rno01524	Protein processing in endoplasmic reticulum|MAPK signaling pathway|TNF signaling pathway|Sphingolipid signaling pathway|Apoptosis|Tight junction|Neurotrophin signaling pathway|Thermogenesis|Amyotrophic lateral sclerosis (ALS)|Fluid shear stress and atherosclerosis|Non-alcoholic fatty liver disease (NAFLD)|Platinum drug resistance	rno-Map3k5_0002	http://159.226.67.237:8080/new/circ_detail.php?ID=rno-Map3k5_0002	RNO_CIRCpedia_1591	ENSRNOT00000051496.6	Map3k5
circRNA_0035|Chr1:15488392_15526167_+	37776	1068	sense-overlapping	NM_001277694.1	Chr1:15412603_15613752_+	Map3k5	GeneID:365057,Genbank:NM_001277694.1,RGD:1306565	mitogen-activated protein kinase kinase kinase 5	GO:0004709,GO:0005515,GO:0005524,GO:0005622,GO:0005737,GO:0034198,GO:0005829,GO:0034976,GO:0006468,GO:0007254,GO:0038066,GO:0042060,GO:0042802,GO:0042803,GO:1900745,GO:0043065,GO:1901216,GO:0043280,GO:1902170,GO:0043507,GO:1902911,GO:1904707,GO:1990604,GO:0000165,GO:0000186,GO:0000187,GO:0000287,GO:0001934,GO:0002931,GO:0004672,GO:0008631,GO:0009897,GO:0010666,GO:0010941,GO:0019901,GO:0019903,GO:…	MAP kinase kinase kinase activity|protein binding|ATP binding|intracellular|cytoplasm|cellular response to amino acid starvation|cytosol|response to endoplasmic reticulum stress|protein phosphorylation|JNK cascade|p38MAPK cascade|wound healing|identical protein binding|protein homodimerization activity|positive regulation of p38MAPK cascade|positive regulation of apoptotic process|positive regula…	rno04141,rno04010,rno04668,rno04071,rno04210,rno04530,rno04722,rno04714,rno05014,rno05418,rno04932,rno01524	Protein processing in endoplasmic reticulum|MAPK signaling pathway|TNF signaling pathway|Sphingolipid signaling pathway|Apoptosis|Tight junction|Neurotrophin signaling pathway|Thermogenesis|Amyotrophic lateral sclerosis (ALS)|Fluid shear stress and atherosclerosis|Non-alcoholic fatty liver disease (NAFLD)|Platinum drug resistance	rno-Map3k5_0009	http://159.226.67.237:8080/new/circ_detail.php?ID=rno-Map3k5_0009
circRNA_0036|Chr1:15488392_15535314_+	46923	1176	sense-overlapping	NM_001277694.1	Chr1:15412603_15613752_+	Map3k5	GeneID:365057,Genbank:NM_001277694.1,RGD:1306565	mitogen-activated protein kinase kinase kinase 5	GO:0004709,GO:0005515,GO:0005524,GO:0005622,GO:0005737,GO:0034198,GO:0005829,GO:0034976,GO:0006468,GO:0007254,GO:0038066,GO:0042060,GO:0042802,GO:0042803,GO:1900745,GO:0043065,GO:1901216,GO:0043280,GO:1902170,GO:0043507,GO:1902911,GO:1904707,GO:1990604,GO:0000165,GO:0000186,GO:0000187,GO:0000287,GO:0001934,GO:0002931,GO:0004672,GO:0008631,GO:0009897,GO:0010666,GO:0010941,GO:0019901,GO:0019903,GO:…	MAP kinase kinase kinase activity|protein binding|ATP binding|intracellular|cytoplasm|cellular response to amino acid starvation|cytosol|response to endoplasmic reticulum stress|protein phosphorylation|JNK cascade|p38MAPK cascade|wound healing|identical protein binding|protein homodimerization activity|positive regulation of p38MAPK cascade|positive regulation of apoptotic process|positive regula…	rno04141,rno04010,rno04668,rno04071,rno04210,rno04530,rno04722,rno04714,rno05014,rno05418,rno04932,rno01524	Protein processing in endoplasmic reticulum|MAPK signaling pathway|TNF signaling pathway|Sphingolipid signaling pathway|Apoptosis|Tight junction|Neurotrophin signaling pathway|Thermogenesis|Amyotrophic lateral sclerosis (ALS)|Fluid shear stress and atherosclerosis|Non-alcoholic fatty liver disease (NAFLD)|Platinum drug resistance	rno-Map3k5_0001	http://159.226.67.237:8080/new/circ_detail.php?ID=rno-Map3k5_0001
circRNA_0037|Chr1:15488392_15567557_+	79166	59739	sense-overlapping	NM_001277694.1	Chr1:15412603_15613752_+	Map3k5	GeneID:365057,Genbank:NM_001277694.1,RGD:1306565	mitogen-activated protein kinase kinase kinase 5	GO:0004709,GO:0005515,GO:0005524,GO:0005622,GO:0005737,GO:0034198,GO:0005829,GO:0034976,GO:0006468,GO:0007254,GO:0038066,GO:0042060,GO:0042802,GO:0042803,GO:1900745,GO:0043065,GO:1901216,GO:0043280,GO:1902170,GO:0043507,GO:1902911,GO:1904707,GO:1990604,GO:0000165,GO:0000186,GO:0000187,GO:0000287,GO:0001934,GO:0002931,GO:0004672,GO:0008631,GO:0009897,GO:0010666,GO:0010941,GO:0019901,GO:0019903,GO:…	MAP kinase kinase kinase activity|protein binding|ATP binding|intracellular|cytoplasm|cellular response to amino acid starvation|cytosol|response to endoplasmic reticulum stress|protein phosphorylation|JNK cascade|p38MAPK cascade|wound healing|identical protein binding|protein homodimerization activity|positive regulation of p38MAPK cascade|positive regulation of apoptotic process|positive regula…	rno04141,rno04010,rno04668,rno04071,rno04210,rno04530,rno04722,rno04714,rno05014,rno05418,rno04932,rno01524	Protein processing in endoplasmic reticulum|MAPK signaling pathway|TNF signaling pathway|Sphingolipid signaling pathway|Apoptosis|Tight junction|Neurotrophin signaling pathway|Thermogenesis|Amyotrophic lateral sclerosis (ALS)|Fluid shear stress and atherosclerosis|Non-alcoholic fatty liver disease (NAFLD)|Platinum drug resistance	rno-Map3k5_0020	http://159.226.67.237:8080/new/circ_detail.php?ID=rno-Map3k5_0020	RNO_CIRCpedia_5059	ENSRNOT00000051496.6	Map3k5
circRNA_0038|Chr1:15545013_15551204_+	6192	225	sense-overlapping	NM_001277694.1	Chr1:15412603_15613752_+	Map3k5	GeneID:365057,Genbank:NM_001277694.1,RGD:1306565	mitogen-activated protein kinase kinase kinase 5	GO:0004709,GO:0005515,GO:0005524,GO:0005622,GO:0005737,GO:0034198,GO:0005829,GO:0034976,GO:0006468,GO:0007254,GO:0038066,GO:0042060,GO:0042802,GO:0042803,GO:1900745,GO:0043065,GO:1901216,GO:0043280,GO:1902170,GO:0043507,GO:1902911,GO:1904707,GO:1990604,GO:0000165,GO:0000186,GO:0000187,GO:0000287,GO:0001934,GO:0002931,GO:0004672,GO:0008631,GO:0009897,GO:0010666,GO:0010941,GO:0019901,GO:0019903,GO:…	MAP kinase kinase kinase activity|protein binding|ATP binding|intracellular|cytoplasm|cellular response to amino acid starvation|cytosol|response to endoplasmic reticulum stress|protein phosphorylation|JNK cascade|p38MAPK cascade|wound healing|identical protein binding|protein homodimerization activity|positive regulation of p38MAPK cascade|positive regulation of apoptotic process|positive regula…	rno04141,rno04010,rno04668,rno04071,rno04210,rno04530,rno04722,rno04714,rno05014,rno05418,rno04932,rno01524	Protein processing in endoplasmic reticulum|MAPK signaling pathway|TNF signaling pathway|Sphingolipid signaling pathway|Apoptosis|Tight junction|Neurotrophin signaling pathway|Thermogenesis|Amyotrophic lateral sclerosis (ALS)|Fluid shear stress and atherosclerosis|Non-alcoholic fatty liver disease (NAFLD)|Platinum drug resistance	rno-Map3k5_0013	http://159.226.67.237:8080/new/circ_detail.php?ID=rno-Map3k5_0013
circRNA_0039|Chr1:16827565_16830659_+	3095	309	sense-overlapping	NM_001011934.1	Chr1:16819170_16896221_+	Hbs1l	GeneID:293408,Genbank:NM_001011934.1,RGD:1308509	HBS1-like translational GTPase	GO:0003924,GO:0005525,GO:0005575,GO:0005622,GO:0006412,GO:0006414,GO:0008150,GO:0003674,GO:0003746	GTPase activity|GTP binding|cellular_component|intracellular|translation|translational elongation|biological_process|molecular_function|translation elongation factor activity	rno03015,rno05134	mRNA surveillance pathway|Legionellosis	rno-Hbs1l_0010	http://159.226.67.237:8080/new/circ_detail.php?ID=rno-Hbs1l_0010
circRNA_0040|Chr1:16859047_16875754_+	16708	1173	sense-overlapping	NM_001011934.1	Chr1:16819170_16896221_+	Hbs1l	GeneID:293408,Genbank:NM_001011934.1,RGD:1308509	HBS1-like translational GTPase	GO:0003924,GO:0005525,GO:0005575,GO:0005622,GO:0006412,GO:0006414,GO:0008150,GO:0003674,GO:0003746	GTPase activity|GTP binding|cellular_component|intracellular|translation|translational elongation|biological_process|molecular_function|translation elongation factor activity	rno03015,rno05134	mRNA surveillance pathway|Legionellosis	rno-Hbs1l_0004	http://159.226.67.237:8080/new/circ_detail.php?ID=rno-Hbs1l_0004
circRNA_0041|Chr1:16859047_16879498_+	20452	1373	sense-overlapping	NM_001011934.1	Chr1:16819170_16896221_+	Hbs1l	GeneID:293408,Genbank:NM_001011934.1,RGD:1308509	HBS1-like translational GTPase	GO:0003924,GO:0005525,GO:0005575,GO:0005622,GO:0006412,GO:0006414,GO:0008150,GO:0003674,GO:0003746	GTPase activity|GTP binding|cellular_component|intracellular|translation|translational elongation|biological_process|molecular_function|translation elongation factor activity	rno03015,rno05134	mRNA surveillance pathway|Legionellosis	rno-Hbs1l_0001	http://159.226.67.237:8080/new/circ_detail.php?ID=rno-Hbs1l_0001
circRNA_0042|Chr1:17549813_17560520_-	10708	721	sense-overlapping	XM_008758616.1	Chr1:17445052_18058252_-	Ptprk	GeneID:360302,Genbank:XM_008758616.1,RGD:619706	protein tyrosine phosphatase, receptor type, K, transcript variant X11	GO:0034644,GO:0019901,GO:0005886,GO:0035335,GO:0030054,GO:0005911,GO:0043025,GO:0030336,GO:0006470,GO:0043231,GO:0007155,GO:0007165,GO:0007179,GO:0030424,GO:0008013,GO:0030425,GO:0008285,GO:0045295,GO:0031175,GO:0009986,GO:0045786,GO:0031256,GO:0010839,GO:0001750,GO:0045892,GO:0034394,GO:0016021,GO:0004725,GO:0048041,GO:0034614,GO:0016477	cellular response to UV|protein kinase binding|plasma membrane|peptidyl-tyrosine dephosphorylation|cell junction|cell-cell junction|neuronal cell body|negative regulation of cell migration|protein dephosphorylation|intracellular membrane-bounded organelle|cell adhesion|signal transduction|transforming growth factor beta receptor signaling pathway|axon|beta-catenin binding|dendrite|negative regula…			rno-Ptprk_0022	http://159.226.67.237:8080/new/circ_detail.php?ID=rno-Ptprk_0022	RNO_CIRCpedia_1597	NM_001029902	Ptprk
circRNA_0043|Chr1:17740072_17769428_-	29357	469	sense-overlapping	XM_008758616.1	Chr1:17445052_18058252_-	Ptprk	GeneID:360302,Genbank:XM_008758616.1,RGD:619706	protein tyrosine phosphatase, receptor type, K, transcript variant X11	GO:0034644,GO:0019901,GO:0005886,GO:0035335,GO:0030054,GO:0005911,GO:0043025,GO:0030336,GO:0006470,GO:0043231,GO:0007155,GO:0007165,GO:0007179,GO:0030424,GO:0008013,GO:0030425,GO:0008285,GO:0045295,GO:0031175,GO:0009986,GO:0045786,GO:0031256,GO:0010839,GO:0001750,GO:0045892,GO:0034394,GO:0016021,GO:0004725,GO:0048041,GO:0034614,GO:0016477	cellular response to UV|protein kinase binding|plasma membrane|peptidyl-tyrosine dephosphorylation|cell junction|cell-cell junction|neuronal cell body|negative regulation of cell migration|protein dephosphorylation|intracellular membrane-bounded organelle|cell adhesion|signal transduction|transforming growth factor beta receptor signaling pathway|axon|beta-catenin binding|dendrite|negative regula…			rno-Ptprk_0009	http://159.226.67.237:8080/new/circ_detail.php?ID=rno-Ptprk_0009	RNO_CIRCpedia_1598	NM_001029902	Ptprk
circRNA_0044|Chr1:18644225_18655979_+	11755	284	sense-overlapping	XM_017590488.1	Chr1:18491264_19143486_+	Lama2	GeneID:309368,Genbank:XM_017590488.1,RGD:1308889	laminin subunit alpha 2, transcript variant X1	GO:0005605,GO:0005615,GO:0007155,GO:0007411,GO:0014037,GO:0030155,GO:0030334,GO:0031012,GO:0032224,GO:0042383,GO:0003674,GO:0043197,GO:0005102,GO:0045995,GO:0005604	basal lamina|extracellular space|cell adhesion|axon guidance|Schwann cell differentiation|regulation of cell adhesion|regulation of cell migration|extracellular matrix|positive regulation of synaptic transmission, cholinergic|sarcolemma|molecular_function|dendritic spine|signaling receptor binding|regulation of embryonic development|basement membrane	rno04151,rno04512,rno04510,rno05200,rno05222,rno05410,rno05412,rno05414,rno05416,rno05165,rno05146,rno05145	PI3K-Akt signaling pathway|ECM-receptor interaction|Focal adhesion|Pathways in cancer|Small cell lung cancer|Hypertrophic cardiomyopathy (HCM)|Arrhythmogenic right ventricular cardiomyopathy (ARVC)|Dilated cardiomyopathy (DCM)|Viral myocarditis|Human papillomavirus infection|Amoebiasis|Toxoplasmosis	rno-Lama2_0001	http://159.226.67.237:8080/new/circ_detail.php?ID=rno-Lama2_0001
circRNA_0045|Chr1:18644225_18694013_+	49789	527	sense-overlapping	XM_017590488.1	Chr1:18491264_19143486_+	Lama2	GeneID:309368,Genbank:XM_017590488.1,RGD:1308889	laminin subunit alpha 2, transcript variant X1	GO:0005605,GO:0005615,GO:0007155,GO:0007411,GO:0014037,GO:0030155,GO:0030334,GO:0031012,GO:0032224,GO:0042383,GO:0003674,GO:0043197,GO:0005102,GO:0045995,GO:0005604	basal lamina|extracellular space|cell adhesion|axon guidance|Schwann cell differentiation|regulation of cell adhesion|regulation of cell migration|extracellular matrix|positive regulation of synaptic transmission, cholinergic|sarcolemma|molecular_function|dendritic spine|signaling receptor binding|regulation of embryonic development|basement membrane	rno04151,rno04512,rno04510,rno05200,rno05222,rno05410,rno05412,rno05414,rno05416,rno05165,rno05146,rno05145	PI3K-Akt signaling pathway|ECM-receptor interaction|Focal adhesion|Pathways in cancer|Small cell lung cancer|Hypertrophic cardiomyopathy (HCM)|Arrhythmogenic right ventricular cardiomyopathy (ARVC)|Dilated cardiomyopathy (DCM)|Viral myocarditis|Human papillomavirus infection|Amoebiasis|Toxoplasmosis	rno-Lama2_0002	http://159.226.67.237:8080/new/circ_detail.php?ID=rno-Lama2_0002
circRNA_0046|Chr1:20001797_20064171_+	62375	1611	sense-overlapping	XM_006227695.3	Chr1:19998778_20097298_+	L3mbtl3	GeneID:309550,Genbank:XM_006227695.3,RGD:1305474	l(3)mbt-like 3 (Drosophila), transcript variant X2	GO:0005730,GO:0006355,GO:0008270,GO:0030099,GO:0030225,GO:0030851,GO:0043249,GO:0003700,GO:0005634	nucleolus|regulation of transcription, DNA-templated|zinc ion binding|myeloid cell differentiation|macrophage differentiation|granulocyte differentiation|erythrocyte maturation|DNA binding transcription factor activity|nucleus
circRNA_0047|Chr1:20001797_20081200_+	79404	42819	sense-overlapping	XM_006227695.3	Chr1:19998778_20097298_+	L3mbtl3	GeneID:309550,Genbank:XM_006227695.3,RGD:1305474	l(3)mbt-like 3 (Drosophila), transcript variant X2	GO:0005730,GO:0006355,GO:0008270,GO:0030099,GO:0030225,GO:0030851,GO:0043249,GO:0003700,GO:0005634	nucleolus|regulation of transcription, DNA-templated|zinc ion binding|myeloid cell differentiation|macrophage differentiation|granulocyte differentiation|erythrocyte maturation|DNA binding transcription factor activity|nucleus			rno-L3mbtl3_0004	http://159.226.67.237:8080/new/circ_detail.php?ID=rno-L3mbtl3_0004
circRNA_0048|Chr1:20022792_20047889_+	25098	1256	sense-overlapping	XM_006227696.3	Chr1:19998776_20097298_+	L3mbtl3	GeneID:309550,Genbank:XM_006227696.3,RGD:1305474	l(3)mbt-like 3 (Drosophila), transcript variant X3	GO:0005730,GO:0006355,GO:0008270,GO:0030099,GO:0030225,GO:0030851,GO:0043249,GO:0003700,GO:0005634	nucleolus|regulation of transcription, DNA-templated|zinc ion binding|myeloid cell differentiation|macrophage differentiation|granulocyte differentiation|erythrocyte maturation|DNA binding transcription factor activity|nucleus			rno-L3mbtl3_0001	http://159.226.67.237:8080/new/circ_detail.php?ID=rno-L3mbtl3_0001
circRNA_0049|Chr1:20022792_20072803_+	50012	21674	sense-overlapping	XM_006227696.3	Chr1:19998776_20097298_+	L3mbtl3	GeneID:309550,Genbank:XM_006227696.3,RGD:1305474	l(3)mbt-like 3 (Drosophila), transcript variant X3	GO:0005730,GO:0006355,GO:0008270,GO:0030099,GO:0030225,GO:0030851,GO:0043249,GO:0003700,GO:0005634	nucleolus|regulation of transcription, DNA-templated|zinc ion binding|myeloid cell differentiation|macrophage differentiation|granulocyte differentiation|erythrocyte maturation|DNA binding transcription factor activity|nucleus			rno-L3mbtl3_0007	http://159.226.67.237:8080/new/circ_detail.php?ID=rno-L3mbtl3_0007
circRNA_0050|Chr1:20022792_20081200_+	58409	1898	sense-overlapping	XM_006227696.3	Chr1:19998776_20097298_+	L3mbtl3	GeneID:309550,Genbank:XM_006227696.3,RGD:1305474	l(3)mbt-like 3 (Drosophila), transcript variant X3	GO:0005730,GO:0006355,GO:0008270,GO:0030099,GO:0030225,GO:0030851,GO:0043249,GO:0003700,GO:0005634	nucleolus|regulation of transcription, DNA-templated|zinc ion binding|myeloid cell differentiation|macrophage differentiation|granulocyte differentiation|erythrocyte maturation|DNA binding transcription factor activity|nucleus			rno-L3mbtl3_0006	http://159.226.67.237:8080/new/circ_detail.php?ID=rno-L3mbtl3_0006
circRNA_0051|Chr1:20945434_20962540_-	17107	809	sense-overlapping	XM_017589845.1	Chr1:20881820_20966788_-	Epb41l2	GeneID:309557,Genbank:XM_017589845.1,RGD:1563977	erythrocyte membrane protein band 4.1-like 2, transcript variant X6	GO:0099738,GO:0005634,GO:1904778,GO:0005654,GO:0005856,GO:0005886,GO:0008180,GO:0030054,GO:0030507,GO:0030866,GO:0003779,GO:0031032,GO:0005198,GO:0042731,GO:0005200	cell cortex region|nucleus|positive regulation of protein localization to cell cortex|nucleoplasm|cytoskeleton|plasma membrane|COP9 signalosome|cell junction|spectrin binding|cortical actin cytoskeleton organization|actin binding|actomyosin structure organization|structural molecule activity|PH domain binding|structural constituent of cytoskeleton			rno-Epb41l2_0006	http://159.226.67.237:8080/new/circ_detail.php?ID=rno-Epb41l2_0006
circRNA_0052|Chr1:20961258_20962540_-	1283	704	sense-overlapping	XM_017589845.1	Chr1:20881820_20966788_-	Epb41l2	GeneID:309557,Genbank:XM_017589845.1,RGD:1563977	erythrocyte membrane protein band 4.1-like 2, transcript variant X6	GO:0099738,GO:0005634,GO:1904778,GO:0005654,GO:0005856,GO:0005886,GO:0008180,GO:0030054,GO:0030507,GO:0030866,GO:0003779,GO:0031032,GO:0005198,GO:0042731,GO:0005200	cell cortex region|nucleus|positive regulation of protein localization to cell cortex|nucleoplasm|cytoskeleton|plasma membrane|COP9 signalosome|cell junction|spectrin binding|cortical actin cytoskeleton organization|actin binding|actomyosin structure organization|structural molecule activity|PH domain binding|structural constituent of cytoskeleton			rno-Epb41l2_0005	http://159.226.67.237:8080/new/circ_detail.php?ID=rno-Epb41l2_0005
circRNA_0053|Chr1:21142145_21149467_+	7323	287	sense-overlapping	NM_001001801.3	Chr1:21129213_21263850_+	Akap7	GeneID:361458,Genbank:NM_001001801.3,RGD:1303071	A-kinase anchoring protein 7	GO:0071320,GO:0032991,GO:0016328,GO:0005737,GO:1901381,GO:0034237,GO:0016529,GO:0005829,GO:1902261,GO:0019901,GO:0008022,GO:0008104,GO:0010738,GO:0019904,GO:0051018,GO:0030315,GO:0016020,GO:0032947,GO:0016208,GO:0005515,GO:0060306,GO:0016324,GO:0005634,GO:0070382	cellular response to cAMP|protein-containing complex|lateral plasma membrane|cytoplasm|positive regulation of potassium ion transmembrane transport|protein kinase A regulatory subunit binding|sarcoplasmic reticulum|cytosol|positive regulation of delayed rectifier potassium channel activity|protein kinase binding|protein C-terminus binding|protein localization|regulation of protein kinase A signal…			rno-Akap7_0001	http://159.226.67.237:8080/new/circ_detail.php?ID=rno-Akap7_0001	RNO_CIRCpedia_1602	ENSRNOT00000017617.7	Akap7
circRNA_0054|Chr1:21142145_21164430_+	22286	585	sense-overlapping	NM_001001801.3	Chr1:21129213_21263850_+	Akap7	GeneID:361458,Genbank:NM_001001801.3,RGD:1303071	A-kinase anchoring protein 7	GO:0071320,GO:0032991,GO:0016328,GO:0005737,GO:1901381,GO:0034237,GO:0016529,GO:0005829,GO:1902261,GO:0019901,GO:0008022,GO:0008104,GO:0010738,GO:0019904,GO:0051018,GO:0030315,GO:0016020,GO:0032947,GO:0016208,GO:0005515,GO:0060306,GO:0016324,GO:0005634,GO:0070382	cellular response to cAMP|protein-containing complex|lateral plasma membrane|cytoplasm|positive regulation of potassium ion transmembrane transport|protein kinase A regulatory subunit binding|sarcoplasmic reticulum|cytosol|positive regulation of delayed rectifier potassium channel activity|protein kinase binding|protein C-terminus binding|protein localization|regulation of protein kinase A signal…			rno-Akap7_0002	http://159.226.67.237:8080/new/circ_detail.php?ID=rno-Akap7_0002	RNO_CIRCpedia_1603	ENSRNOT00000017617.7	Akap7
circRNA_0055|Chr1:21142145_21211619_+	69475	846	sense-overlapping	NM_001001801.3	Chr1:21129213_21263850_+	Akap7	GeneID:361458,Genbank:NM_001001801.3,RGD:1303071	A-kinase anchoring protein 7	GO:0071320,GO:0032991,GO:0016328,GO:0005737,GO:1901381,GO:0034237,GO:0016529,GO:0005829,GO:1902261,GO:0019901,GO:0008022,GO:0008104,GO:0010738,GO:0019904,GO:0051018,GO:0030315,GO:0016020,GO:0032947,GO:0016208,GO:0005515,GO:0060306,GO:0016324,GO:0005634,GO:0070382	cellular response to cAMP|protein-containing complex|lateral plasma membrane|cytoplasm|positive regulation of potassium ion transmembrane transport|protein kinase A regulatory subunit binding|sarcoplasmic reticulum|cytosol|positive regulation of delayed rectifier potassium channel activity|protein kinase binding|protein C-terminus binding|protein localization|regulation of protein kinase A signal…			rno-Akap7_0008	http://159.226.67.237:8080/new/circ_detail.php?ID=rno-Akap7_0008	RNO_CIRCpedia_1604	ENSRNOT00000017617.7	Akap7
circRNA_0056|Chr1:21149313_21164430_+	15118	453	sense-overlapping	NM_001001801.3	Chr1:21129213_21263850_+	Akap7	GeneID:361458,Genbank:NM_001001801.3,RGD:1303071	A-kinase anchoring protein 7	GO:0071320,GO:0032991,GO:0016328,GO:0005737,GO:1901381,GO:0034237,GO:0016529,GO:0005829,GO:1902261,GO:0019901,GO:0008022,GO:0008104,GO:0010738,GO:0019904,GO:0051018,GO:0030315,GO:0016020,GO:0032947,GO:0016208,GO:0005515,GO:0060306,GO:0016324,GO:0005634,GO:0070382	cellular response to cAMP|protein-containing complex|lateral plasma membrane|cytoplasm|positive regulation of potassium ion transmembrane transport|protein kinase A regulatory subunit binding|sarcoplasmic reticulum|cytosol|positive regulation of delayed rectifier potassium channel activity|protein kinase binding|protein C-terminus binding|protein localization|regulation of protein kinase A signal…			rno-Akap7_0003	http://159.226.67.237:8080/new/circ_detail.php?ID=rno-Akap7_0003	RNO_CIRCpedia_1605	ENSRNOT00000017617.7	Akap7
circRNA_0057|Chr1:21149313_21211619_+	62307	714	sense-overlapping	NM_001001801.3	Chr1:21129213_21263850_+	Akap7	GeneID:361458,Genbank:NM_001001801.3,RGD:1303071	A-kinase anchoring protein 7	GO:0071320,GO:0032991,GO:0016328,GO:0005737,GO:1901381,GO:0034237,GO:0016529,GO:0005829,GO:1902261,GO:0019901,GO:0008022,GO:0008104,GO:0010738,GO:0019904,GO:0051018,GO:0030315,GO:0016020,GO:0032947,GO:0016208,GO:0005515,GO:0060306,GO:0016324,GO:0005634,GO:0070382	cellular response to cAMP|protein-containing complex|lateral plasma membrane|cytoplasm|positive regulation of potassium ion transmembrane transport|protein kinase A regulatory subunit binding|sarcoplasmic reticulum|cytosol|positive regulation of delayed rectifier potassium channel activity|protein kinase binding|protein C-terminus binding|protein localization|regulation of protein kinase A signal…			rno-Akap7_0005	http://159.226.67.237:8080/new/circ_detail.php?ID=rno-Akap7_0005	RNO_CIRCpedia_6499	ENSRNOT00000017617.7	Akap7
circRNA_0058|Chr1:21155741_21211619_+	55879	5723	sense-overlapping	NM_001001801.3	Chr1:21129213_21263850_+	Akap7	GeneID:361458,Genbank:NM_001001801.3,RGD:1303071	A-kinase anchoring protein 7	GO:0071320,GO:0032991,GO:0016328,GO:0005737,GO:1901381,GO:0034237,GO:0016529,GO:0005829,GO:1902261,GO:0019901,GO:0008022,GO:0008104,GO:0010738,GO:0019904,GO:0051018,GO:0030315,GO:0016020,GO:0032947,GO:0016208,GO:0005515,GO:0060306,GO:0016324,GO:0005634,GO:0070382	cellular response to cAMP|protein-containing complex|lateral plasma membrane|cytoplasm|positive regulation of potassium ion transmembrane transport|protein kinase A regulatory subunit binding|sarcoplasmic reticulum|cytosol|positive regulation of delayed rectifier potassium channel activity|protein kinase binding|protein C-terminus binding|protein localization|regulation of protein kinase A signal…			rno-Akap7_0012	http://159.226.67.237:8080/new/circ_detail.php?ID=rno-Akap7_0012
circRNA_0059|Chr1:21160905_21190087_+	29183	411	sense-overlapping	NM_001001801.3	Chr1:21129213_21263850_+	Akap7	GeneID:361458,Genbank:NM_001001801.3,RGD:1303071	A-kinase anchoring protein 7	GO:0071320,GO:0032991,GO:0016328,GO:0005737,GO:1901381,GO:0034237,GO:0016529,GO:0005829,GO:1902261,GO:0019901,GO:0008022,GO:0008104,GO:0010738,GO:0019904,GO:0051018,GO:0030315,GO:0016020,GO:0032947,GO:0016208,GO:0005515,GO:0060306,GO:0016324,GO:0005634,GO:0070382	cellular response to cAMP|protein-containing complex|lateral plasma membrane|cytoplasm|positive regulation of potassium ion transmembrane transport|protein kinase A regulatory subunit binding|sarcoplasmic reticulum|cytosol|positive regulation of delayed rectifier potassium channel activity|protein kinase binding|protein C-terminus binding|protein localization|regulation of protein kinase A signal…			rno-Akap7_0010	http://159.226.67.237:8080/new/circ_detail.php?ID=rno-Akap7_0010
circRNA_0060|Chr1:21160905_21211619_+	50715	559	sense-overlapping	NM_001001801.3	Chr1:21129213_21263850_+	Akap7	GeneID:361458,Genbank:NM_001001801.3,RGD:1303071	A-kinase anchoring protein 7	GO:0071320,GO:0032991,GO:0016328,GO:0005737,GO:1901381,GO:0034237,GO:0016529,GO:0005829,GO:1902261,GO:0019901,GO:0008022,GO:0008104,GO:0010738,GO:0019904,GO:0051018,GO:0030315,GO:0016020,GO:0032947,GO:0016208,GO:0005515,GO:0060306,GO:0016324,GO:0005634,GO:0070382	cellular response to cAMP|protein-containing complex|lateral plasma membrane|cytoplasm|positive regulation of potassium ion transmembrane transport|protein kinase A regulatory subunit binding|sarcoplasmic reticulum|cytosol|positive regulation of delayed rectifier potassium channel activity|protein kinase binding|protein C-terminus binding|protein localization|regulation of protein kinase A signal…			rno-Akap7_0004	http://159.226.67.237:8080/new/circ_detail.php?ID=rno-Akap7_0004	RNO_CIRCpedia_6500	ENSRNOT00000017617.7	Akap7
circRNA_0061|Chr1:21189975_21211619_+	21645	261	sense-overlapping	NM_001001801.3	Chr1:21129213_21263850_+	Akap7	GeneID:361458,Genbank:NM_001001801.3,RGD:1303071	A-kinase anchoring protein 7	GO:0071320,GO:0032991,GO:0016328,GO:0005737,GO:1901381,GO:0034237,GO:0016529,GO:0005829,GO:1902261,GO:0019901,GO:0008022,GO:0008104,GO:0010738,GO:0019904,GO:0051018,GO:0030315,GO:0016020,GO:0032947,GO:0016208,GO:0005515,GO:0060306,GO:0016324,GO:0005634,GO:0070382	cellular response to cAMP|protein-containing complex|lateral plasma membrane|cytoplasm|positive regulation of potassium ion transmembrane transport|protein kinase A regulatory subunit binding|sarcoplasmic reticulum|cytosol|positive regulation of delayed rectifier potassium channel activity|protein kinase binding|protein C-terminus binding|protein localization|regulation of protein kinase A signal…			rno-Akap7_0006	http://159.226.67.237:8080/new/circ_detail.php?ID=rno-Akap7_0006	RNO_CIRCpedia_1606	ENSRNOT00000017617.7	Akap7
circRNA_0062|Chr1:21647066_21662702_+	15637	692	sense-overlapping	NM_019370.2	Chr1:21613148_21684483_+	Enpp3	GeneID:54410,Genbank:NM_019370.2,RGD:708511	ectonucleotide pyrophosphatase/phosphodiesterase 3	GO:0051150,GO:0005044,GO:0090305,GO:0006796,GO:0006898,GO:0006955,GO:0009143,GO:0009986,GO:0016021,GO:0030247,GO:0030505,GO:0035529,GO:0046872,GO:0003676,GO:0047429,GO:0004528,GO:0048471,GO:0004551	regulation of smooth muscle cell differentiation|scavenger receptor activity|nucleic acid phosphodiester bond hydrolysis|phosphate-containing compound metabolic process|receptor-mediated endocytosis|immune response|nucleoside triphosphate catabolic process|cell surface|integral component of membrane|polysaccharide binding|inorganic diphosphate transport|NADH pyrophosphatase activity|metal ion bin…	rno00500,rno00230,rno00240,rno00740,rno00760,rno00770	Starch and sucrose metabolism|Purine metabolism|Pyrimidine metabolism|Riboflavin metabolism|Nicotinate and nicotinamide metabolism|Pantothenate and CoA biosynthesis
circRNA_0063|Chr1:21647066_21669779_+	22714	1078	sense-overlapping	NM_019370.2	Chr1:21613148_21684483_+	Enpp3	GeneID:54410,Genbank:NM_019370.2,RGD:708511	ectonucleotide pyrophosphatase/phosphodiesterase 3	GO:0051150,GO:0005044,GO:0090305,GO:0006796,GO:0006898,GO:0006955,GO:0009143,GO:0009986,GO:0016021,GO:0030247,GO:0030505,GO:0035529,GO:0046872,GO:0003676,GO:0047429,GO:0004528,GO:0048471,GO:0004551	regulation of smooth muscle cell differentiation|scavenger receptor activity|nucleic acid phosphodiester bond hydrolysis|phosphate-containing compound metabolic process|receptor-mediated endocytosis|immune response|nucleoside triphosphate catabolic process|cell surface|integral component of membrane|polysaccharide binding|inorganic diphosphate transport|NADH pyrophosphatase activity|metal ion bin…	rno00500,rno00230,rno00240,rno00740,rno00760,rno00770	Starch and sucrose metabolism|Purine metabolism|Pyrimidine metabolism|Riboflavin metabolism|Nicotinate and nicotinamide metabolism|Pantothenate and CoA biosynthesis
circRNA_0064|Chr1:21794126_21799214_+	5089	450	sense-overlapping	XM_006227692.3	Chr1:21748201_21813205_+	Enpp1	GeneID:85496,Genbank:XM_006227692.3,RGD:628825	ectonucleotide pyrophosphatase/phosphodiesterase 1, transcript variant X1	GO:0004551,GO:0005044,GO:0005158,GO:0005509,GO:0005524,GO:0008270,GO:0005615,GO:0009143,GO:0009612,GO:0009986,GO:0030505,GO:0016021,GO:0030643,GO:0030730,GO:0031214,GO:0001889,GO:0045599,GO:0031953,GO:0003676,GO:0004527,GO:0045719,GO:0032869,GO:0004528,GO:0046034,GO:0046325,GO:0090305,GO:0046627,GO:0097440,GO:0097441,GO:0005886,GO:0005887,GO:0006091,GO:0016323,GO:0006796,GO:0021549,GO:0006898,GO:…	nucleotide diphosphatase activity|scavenger receptor activity|insulin receptor binding|calcium ion binding|ATP binding|zinc ion binding|extracellular space|nucleoside triphosphate catabolic process|response to mechanical stimulus|cell surface|inorganic diphosphate transport|integral component of membrane|cellular phosphate ion homeostasis|sequestering of triglyceride|biomineral tissue development…	rno00500,rno00230,rno00240,rno00740,rno00760,rno00770	Starch and sucrose metabolism|Purine metabolism|Pyrimidine metabolism|Riboflavin metabolism|Nicotinate and nicotinamide metabolism|Pantothenate and CoA biosynthesis	rno-Enpp1_0002	http://159.226.67.237:8080/new/circ_detail.php?ID=rno-Enpp1_0002
circRNA_0065|Chr1:22707360_22707595_-	236	144	sense-overlapping	XM_006227717.3	Chr1:22705980_22748567_-	Slc18b1	GeneID:309570,Genbank:XM_006227717.3,RGD:1306962	solute carrier family 18 member B1, transcript variant X2	GO:0005887,GO:0022857,GO:0055085	integral component of plasma membrane|transmembrane transporter activity|transmembrane transport			rno-Slc18b1_0002	http://159.226.67.237:8080/new/circ_detail.php?ID=rno-Slc18b1_0002	RNO_CIRCpedia_9385	ENSRNOT00000021944.7	Slc18b1
circRNA_0066|Chr1:22735614_22738713_-	3100	318	sense-overlapping	XM_006227717.3	Chr1:22705980_22748567_-	Slc18b1	GeneID:309570,Genbank:XM_006227717.3,RGD:1306962	solute carrier family 18 member B1, transcript variant X2	GO:0005887,GO:0022857,GO:0055085	integral component of plasma membrane|transmembrane transporter activity|transmembrane transport			rno-Slc18b1_0001	http://159.226.67.237:8080/new/circ_detail.php?ID=rno-Slc18b1_0001	RNO_CIRCpedia_1608	ENSRNOT00000021944.7	Slc18b1
circRNA_0067|Chr1:23409410_23430444_+	21035	887	sense-overlapping	XM_008758600.1	Chr1:23260940_23459246_+	Eya4	GeneID:292172,Genbank:XM_008758600.1,RGD:1307099	EYA transcriptional coactivator and phosphatase 4, transcript variant X1	GO:0006355,GO:0007605,GO:0008134,GO:0016576,GO:0030154,GO:0035335,GO:0042474,GO:0045739,GO:0046872,GO:0048839,GO:0048856,GO:0004725,GO:2001240,GO:0005575,GO:0005634	regulation of transcription, DNA-templated|sensory perception of sound|transcription factor binding|histone dephosphorylation|cell differentiation|peptidyl-tyrosine dephosphorylation|middle ear morphogenesis|positive regulation of DNA repair|metal ion binding|inner ear development|anatomical structure development|protein tyrosine phosphatase activity|negative regulation of extrinsic apoptotic sig…			rno-Eya4_0006	http://159.226.67.237:8080/new/circ_detail.php?ID=rno-Eya4_0006
circRNA_0068|Chr1:23418770_23441794_+	23025	914	sense-overlapping	NM_001271317.1	Chr1:23237617_23611580_+	Eya4	GeneID:292172,Genbank:NM_001271317.1,RGD:1307099	EYA transcriptional coactivator and phosphatase 4	GO:0006355,GO:0007605,GO:0008134,GO:0016576,GO:0030154,GO:0035335,GO:0042474,GO:0045739,GO:0046872,GO:0048839,GO:0048856,GO:0004725,GO:2001240,GO:0005575,GO:0005634	regulation of transcription, DNA-templated|sensory perception of sound|transcription factor binding|histone dephosphorylation|cell differentiation|peptidyl-tyrosine dephosphorylation|middle ear morphogenesis|positive regulation of DNA repair|metal ion binding|inner ear development|anatomical structure development|protein tyrosine phosphatase activity|negative regulation of extrinsic apoptotic sig…
circRNA_0069|Chr1:23418785_23441794_+	23010	899	sense-overlapping	NM_001271317.1	Chr1:23237617_23611580_+	Eya4	GeneID:292172,Genbank:NM_001271317.1,RGD:1307099	EYA transcriptional coactivator and phosphatase 4	GO:0006355,GO:0007605,GO:0008134,GO:0016576,GO:0030154,GO:0035335,GO:0042474,GO:0045739,GO:0046872,GO:0048839,GO:0048856,GO:0004725,GO:2001240,GO:0005575,GO:0005634	regulation of transcription, DNA-templated|sensory perception of sound|transcription factor binding|histone dephosphorylation|cell differentiation|peptidyl-tyrosine dephosphorylation|middle ear morphogenesis|positive regulation of DNA repair|metal ion binding|inner ear development|anatomical structure development|protein tyrosine phosphatase activity|negative regulation of extrinsic apoptotic sig…
circRNA_0070|Chr1:23995884_24002194_+	6311	828	sense-overlapping	XM_006227722.3	Chr1:23977154_24002512_+	Tbpl1	GeneID:689030,Genbank:XM_006227722.3,RGD:1597456	TATA-box binding protein like 1, transcript variant X2	GO:0005634,GO:0005672,GO:0005737,GO:0006235,GO:0006352,GO:0006366,GO:0007283,GO:0007289,GO:0045944,GO:0000978,GO:0001077,GO:0001675	nucleus|transcription factor TFIIA complex|cytoplasm|dTTP biosynthetic process|DNA-templated transcription, initiation|transcription by RNA polymerase II|spermatogenesis|spermatid nucleus differentiation|positive regulation of transcription by RNA polymerase II|RNA polymerase II proximal promoter sequence-specific DNA binding|transcriptional activator activity, RNA polymerase II proximal promoter…	rno03022,rno05203,rno05016,rno05166,rno05168,rno05169,rno05165	Basal transcription factors|Viral carcinogenesis|Huntington's disease|HTLV-I infection|Herpes simplex infection|Epstein-Barr virus infection|Human papillomavirus infection	rno-Tbpl1_0002	http://159.226.67.237:8080/new/circ_detail.php?ID=rno-Tbpl1_0002
circRNA_0071|Chr1:25767968_25787662_-	19695	405	sense-overlapping	NM_021666.2	Chr1:25403390_25787664_-	Trdn	GeneID:59299,Genbank:NM_021666.2,RGD:619856	triadin	GO:0005891,GO:0006874,GO:0006936,GO:0010649,GO:0010880,GO:0030674,GO:0031122,GO:0014070,GO:0034704,GO:0014701,GO:0042383,GO:0043231,GO:0044325,GO:0051280,GO:0051281,GO:0060047,GO:0005102,GO:0005515,GO:0005783,GO:0005829,GO:0005886,GO:0014808,GO:0014902,GO:0016021,GO:0016529,GO:0030314,GO:0060316,GO:0086036,GO:0090158,GO:1901846	voltage-gated calcium channel complex|cellular calcium ion homeostasis|muscle contraction|regulation of cell communication by electrical coupling|regulation of release of sequestered calcium ion into cytosol by sarcoplasmic reticulum|protein binding, bridging|cytoplasmic microtubule organization|response to organic cyclic compound|calcium channel complex|junctional sarcoplasmic reticulum membrane…			rno-Trdn_0005	http://159.226.67.237:8080/new/circ_detail.php?ID=rno-Trdn_0005
circRNA_0072|Chr1:28253104_28262294_-	9191	9191	intergenic										rno-intergenic_000826	http://159.226.67.237:8080/new/circ_detail.php?ID=rno-intergenic_000826
circRNA_0073|Chr1:28362167_28375861_+	13695	399	sense-overlapping	NM_001106204.1	Chr1:28301960_28391582_+	Rnf217	GeneID:292188,Genbank:NM_001106204.1,RGD:1306836	ring finger protein 217	GO:0005737,GO:0031624,GO:0032436,GO:0061630,GO:0000151,GO:0000209,GO:0004842	cytoplasm|ubiquitin conjugating enzyme binding|positive regulation of proteasomal ubiquitin-dependent protein catabolic process|ubiquitin protein ligase activity|ubiquitin ligase complex|protein polyubiquitination|ubiquitin-protein transferase activity			rno-Rnf217_0001	http://159.226.67.237:8080/new/circ_detail.php?ID=rno-Rnf217_0001	RNO_CIRCpedia_1611	ENSRNOT00000017831.5	Rnf217
circRNA_0074|Chr1:28362167_28391305_+	29139	1231	sense-overlapping	NM_001106204.1	Chr1:28301960_28391582_+	Rnf217	GeneID:292188,Genbank:NM_001106204.1,RGD:1306836	ring finger protein 217	GO:0005737,GO:0031624,GO:0032436,GO:0061630,GO:0000151,GO:0000209,GO:0004842	cytoplasm|ubiquitin conjugating enzyme binding|positive regulation of proteasomal ubiquitin-dependent protein catabolic process|ubiquitin protein ligase activity|ubiquitin ligase complex|protein polyubiquitination|ubiquitin-protein transferase activity			rno-Rnf217_0004	http://159.226.67.237:8080/new/circ_detail.php?ID=rno-Rnf217_0004
circRNA_0075|Chr1:29249555_29265220_+	15666	15666	sense-overlapping	XM_006227758.3	Chr1:29225727_29386642_+	Ncoa7	GeneID:498995,Genbank:XM_006227758.3,RGD:1566426	nuclear receptor coactivator 7, transcript variant X1	GO:0035257,GO:0045944,GO:1900408,GO:1902083,GO:1903204,GO:0005622,GO:0030374	nuclear hormone receptor binding|positive regulation of transcription by RNA polymerase II|negative regulation of cellular response to oxidative stress|negative regulation of peptidyl-cysteine S-nitrosylation|negative regulation of oxidative stress-induced neuron death|intracellular|ligand-dependent nuclear receptor transcription coactivator activity			rno-Ncoa7_0010	http://159.226.67.237:8080/new/circ_detail.php?ID=rno-Ncoa7_0010
circRNA_0076|Chr1:29457380_29462756_+	5377	451	sense-overlapping	XM_006227751.3	Chr1:29432109_29480829_+	Trmt11	GeneID:378794,Genbank:XM_006227751.3,RGD:727798	tRNA methyltransferase 11 homolog, transcript variant X4	GO:0008168,GO:0030488,GO:0032259,GO:0000049,GO:0003676,GO:0004809	methyltransferase activity|tRNA methylation|methylation|tRNA binding|nucleic acid binding|tRNA (guanine-N2-)-methyltransferase activity			rno-Trmt11_0009	http://159.226.67.237:8080/new/circ_detail.php?ID=rno-Trmt11_0009
circRNA_0077|Chr1:29457380_29471715_+	14336	572	sense-overlapping	XM_006227751.3	Chr1:29432109_29480829_+	Trmt11	GeneID:378794,Genbank:XM_006227751.3,RGD:727798	tRNA methyltransferase 11 homolog, transcript variant X4	GO:0008168,GO:0030488,GO:0032259,GO:0000049,GO:0003676,GO:0004809	methyltransferase activity|tRNA methylation|methylation|tRNA binding|nucleic acid binding|tRNA (guanine-N2-)-methyltransferase activity			rno-Trmt11_0001	http://159.226.67.237:8080/new/circ_detail.php?ID=rno-Trmt11_0001	RNO_CIRCpedia_1613	NM_198051	Trmt11
circRNA_0078|Chr1:31567990_31569600_+	1611	150	sense-overlapping	NM_130428.1	Chr1:31545631_31570601_+	Sdha	GeneID:157074,Genbank:NM_130428.1,RGD:621557	succinate dehydrogenase complex flavoprotein subunit A	GO:0022904,GO:0007399,GO:0005730,GO:0008177,GO:0043209,GO:0005739,GO:0045282,GO:0005743,GO:0005749,GO:0006099,GO:0050660,GO:0009055,GO:0006105,GO:0055114,GO:0009061,GO:0000104,GO:0016491,GO:0006121	respiratory electron transport chain|nervous system development|nucleolus|succinate dehydrogenase (ubiquinone) activity|myelin sheath|mitochondrion|plasma membrane succinate dehydrogenase complex|mitochondrial inner membrane|mitochondrial respiratory chain complex II, succinate dehydrogenase complex (ubiquinone)|tricarboxylic acid cycle|flavin adenine dinucleotide binding|electron transfer activi…	rno00020,rno00190,rno04714,rno05010,rno05012,rno05016,rno04932	Citrate cycle (TCA cycle)|Oxidative phosphorylation|Thermogenesis|Alzheimer's disease|Parkinson's disease|Huntington's disease|Non-alcoholic fatty liver disease (NAFLD)
circRNA_0079|Chr1:31714405_31718649_+	4245	926	sense-overlapping	NM_001024964.1	Chr1:31700953_31731700_+	Exoc3	GeneID:252881,Genbank:NM_001024964.1,RGD:621790	exocyst complex component 3	GO:0005794,GO:0006887,GO:0015031,GO:0030426,GO:0030496,GO:0045296,GO:0048471,GO:0051601,GO:0000145,GO:0000149,GO:0005515	Golgi apparatus|exocytosis|protein transport|growth cone|midbody|cadherin binding|perinuclear region of cytoplasm|exocyst localization|exocyst|SNARE binding|protein binding			rno-Exoc3_0001	http://159.226.67.237:8080/new/circ_detail.php?ID=rno-Exoc3_0001
circRNA_0080|Chr1:31950617_31954909_-	4293	341	sense-overlapping	NM_001107453.1	Chr1:31939612_31967859_-	Brd9	GeneID:308067,Genbank:NM_001107453.1,RGD:1307359	bromodomain containing 9	GO:0070577,GO:0003674,GO:0005575,GO:0008150	lysine-acetylated histone binding|molecular_function|cellular_component|biological_process			rno-Brd9_0002	http://159.226.67.237:8080/new/circ_detail.php?ID=rno-Brd9_0002	RNO_CIRCpedia_8387	ENSRNOT00000021000.7	Brd9
circRNA_0081|Chr1:31950617_31962264_-	11648	773	sense-overlapping	NM_001107453.1	Chr1:31939612_31967859_-	Brd9	GeneID:308067,Genbank:NM_001107453.1,RGD:1307359	bromodomain containing 9	GO:0070577,GO:0003674,GO:0005575,GO:0008150	lysine-acetylated histone binding|molecular_function|cellular_component|biological_process			rno-Brd9_0003	http://159.226.67.237:8080/new/circ_detail.php?ID=rno-Brd9_0003
circRNA_0082|Chr1:31950617_31962268_-	11652	777	sense-overlapping	NM_001107453.1	Chr1:31939612_31967859_-	Brd9	GeneID:308067,Genbank:NM_001107453.1,RGD:1307359	bromodomain containing 9	GO:0070577,GO:0003674,GO:0005575,GO:0008150	lysine-acetylated histone binding|molecular_function|cellular_component|biological_process			rno-Brd9_0004	http://159.226.67.237:8080/new/circ_detail.php?ID=rno-Brd9_0004
circRNA_0083|Chr1:36417425_36419485_+	2061	292	sense-overlapping	XM_006227782.3	Chr1:36400056_36431254_+	Papd7	GeneID:306672,Genbank:XM_006227782.3,RGD:1307356	PAP associated domain containing 7, transcript variant X2	GO:0005794,GO:0016779,GO:0031965,GO:0042493,GO:0005634,GO:0005654	Golgi apparatus|nucleotidyltransferase activity|nuclear membrane|response to drug|nucleus|nucleoplasm	rno03018	RNA degradation	rno-Papd7_0001	http://159.226.67.237:8080/new/circ_detail.php?ID=rno-Papd7_0001	RNO_CIRCpedia_1616	NM_001107333	Papd7
circRNA_0084|Chr1:36417425_36422602_+	5178	529	sense-overlapping	XM_006227782.3	Chr1:36400056_36431254_+	Papd7	GeneID:306672,Genbank:XM_006227782.3,RGD:1307356	PAP associated domain containing 7, transcript variant X2	GO:0005794,GO:0016779,GO:0031965,GO:0042493,GO:0005634,GO:0005654	Golgi apparatus|nucleotidyltransferase activity|nuclear membrane|response to drug|nucleus|nucleoplasm	rno03018	RNA degradation
circRNA_0085|Chr1:37059608_37059805_+	198	198	exonic	NM_031007.1	Chr1:37043071_37698390_+	Adcy2	GeneID:81636,Genbank:NM_031007.1,RGD:619965	adenylate cyclase 2	GO:0005737,GO:0005886,GO:0005887,GO:0019933,GO:0006171,GO:0030145,GO:0030425,GO:0006182,GO:0031683,GO:0032991,GO:0035556,GO:0045121,GO:0046982,GO:0000166,GO:0000287,GO:0004016,GO:0004383,GO:0005515,GO:0005524,GO:0005622,GO:0007165,GO:0007188,GO:0007189,GO:0008074,GO:0008179,GO:0009190,GO:1904322,GO:0016020,GO:0016021	cytoplasm|plasma membrane|integral component of plasma membrane|cAMP-mediated signaling|cAMP biosynthetic process|manganese ion binding|dendrite|cGMP biosynthetic process|G-protein beta/gamma-subunit complex binding|protein-containing complex|intracellular signal transduction|membrane raft|protein heterodimerization activity|nucleotide binding|magnesium ion binding|adenylate cyclase activity|guan…	rno00230,rno04015,rno04371,rno04020,rno04072,rno04024,rno04022,rno04114,rno04540,rno04611,rno04062,rno04911,rno04922,rno04923,rno04912,rno04913,rno04915,rno04914,rno04921,rno04926,rno04918,rno04916,rno04925,rno04927,rno04261,rno04270,rno04970,rno04971,rno04972,rno04976,rno04724,rno04727,rno04725,rno04723,rno04750,rno04211,rno04213,rno04713,rno04714,rno05200,rno05032,rno05414,rno04934,rno05166,rno…	Purine metabolism|Rap1 signaling pathway|Apelin signaling pathway|Calcium signaling pathway|Phospholipase D signaling pathway|cAMP signaling pathway|cGMP - PKG signaling pathway|Oocyte meiosis|Gap junction|Platelet activation|Chemokine signaling pathway|Insulin secretion|Glucagon signaling pathway|Regulation of lipolysis in adipocyte|GnRH signaling pathway|Ovarian Steroidogenesis|Estrogen signali…	rno-AABR07001068_0002	http://159.226.67.237:8080/new/circ_detail.php?ID=rno-AABR07001068_0002
circRNA_0086|Chr1:37811063_37811741_-	679	223	sense-overlapping	NM_001139491.1	Chr1:37802591_37818879_-	LOC680200	GeneID:680200,Genbank:NM_001139491.1,RGD:1594231	similar to zinc finger protein 455	GO:0005634,GO:0006355,GO:0046872,GO:0003676,GO:0003700,GO:0005622	nucleus|regulation of transcription, DNA-templated|metal ion binding|nucleic acid binding|DNA binding transcription factor activity|intracellular			rno-LOC680200_0001	http://159.226.67.237:8080/new/circ_detail.php?ID=rno-LOC680200_0001	RNO_CIRCpedia_1620	NM_001139491	LOC680200
circRNA_0087|Chr1:37988341_37990001_-	1661	223	sense-overlapping	XM_017590418.1	Chr1:37977333_38009465_-	Zfp748	GeneID:680258,Genbank:XM_017590418.1,RGD:1594173	zinc finger protein 748, transcript variant X1					rno-AABR07001100_0001	http://159.226.67.237:8080/new/circ_detail.php?ID=rno-AABR07001100_0001
circRNA_0088|Chr1:40432571_40459139_+	26569	1928	sense-overlapping	XM_017589700.1	Chr1:40286908_40521395_+	Plekhg1	GeneID:679812,Genbank:XM_017589700.1,RGD:1583676	pleckstrin homology and RhoGEF domain containing G1, transcript variant X3	GO:0005654,GO:0035023,GO:0005089,GO:0005634	nucleoplasm|regulation of Rho protein signal transduction|Rho guanyl-nucleotide exchange factor activity|nucleus			rno-Plekhg1_0003	http://159.226.67.237:8080/new/circ_detail.php?ID=rno-Plekhg1_0003
circRNA_0089|Chr1:40899152_40903958_+	4807	4807	exonic	NM_057103.2	Chr1:40816130_40906582_+	Akap12	GeneID:83425,Genbank:NM_057103.2,RGD:70988	A-kinase anchoring protein 12, transcript variant 1	GO:0005886,GO:0006605,GO:0007165,GO:0007193,GO:0008179,GO:0010738,GO:0051018,GO:0090036,GO:0005829,GO:0005856	plasma membrane|protein targeting|signal transduction|adenylate cyclase-inhibiting G-protein coupled receptor signaling pathway|adenylate cyclase binding|regulation of protein kinase A signaling|protein kinase A binding|regulation of protein kinase C signaling|cytosol|cytoskeleton
circRNA_0090|Chr1:40899152_40906428_+	7277	5654	sense-overlapping	NM_057103.2	Chr1:40816130_40906582_+	Akap12	GeneID:83425,Genbank:NM_057103.2,RGD:70988	A-kinase anchoring protein 12, transcript variant 1	GO:0005886,GO:0006605,GO:0007165,GO:0007193,GO:0008179,GO:0010738,GO:0051018,GO:0090036,GO:0005829,GO:0005856	plasma membrane|protein targeting|signal transduction|adenylate cyclase-inhibiting G-protein coupled receptor signaling pathway|adenylate cyclase binding|regulation of protein kinase A signaling|protein kinase A binding|regulation of protein kinase C signaling|cytosol|cytoskeleton
circRNA_0091|Chr1:41072514_41075117_+	2604	331	sense-overlapping	XM_017589887.1	Chr1:41033284_41126116_+	Ccdc170	GeneID:292266,Genbank:XM_017589887.1,RGD:1310945	coiled-coil domain containing 170, transcript variant X3					rno-Ccdc170_0001	http://159.226.67.237:8080/new/circ_detail.php?ID=rno-Ccdc170_0001
circRNA_0092|Chr1:42970702_42981490_-	10789	10789	intergenic
circRNA_0093|Chr1:43594671_43617390_-	22720	679	sense-overlapping	XM_017589334.1	Chr1:43563457_43637729_-	Ipcef1	GeneID:361474,Genbank:XM_017589334.1,RGD:735159	interaction protein for cytohesin exchange factors 1, transcript variant X2	GO:0019904,GO:0005515,GO:0005829,GO:0005886	protein domain specific binding|protein binding|cytosol|plasma membrane			rno-Ipcef1_0009	http://159.226.67.237:8080/new/circ_detail.php?ID=rno-Ipcef1_0009
circRNA_0094|Chr1:43637223_43638071_-	849	210	sense-overlapping	XM_017589339.1	Chr1:43563457_43641485_-	Ipcef1	GeneID:361474,Genbank:XM_017589339.1,RGD:735159	interaction protein for cytohesin exchange factors 1, transcript variant X7	GO:0019904,GO:0005515,GO:0005829,GO:0005886	protein domain specific binding|protein binding|cytosol|plasma membrane			rno-Ipcef1_0004	http://159.226.67.237:8080/new/circ_detail.php?ID=rno-Ipcef1_0004
circRNA_0095|Chr1:43797777_43806044_-	8268	640	sense-overlapping	XM_006227875.3	Chr1:43789797_43863444_-	Cnksr3	GeneID:308113,Genbank:XM_006227875.3,RGD:1307544	Cnksr family member 3, transcript variant X1	GO:0007165,GO:0007265,GO:0009966,GO:0010765,GO:0016020,GO:0016324,GO:0019887,GO:0033137,GO:0070373,GO:0005737,GO:0005886,GO:2000651,GO:0005938	signal transduction|Ras protein signal transduction|regulation of signal transduction|positive regulation of sodium ion transport|membrane|apical plasma membrane|protein kinase regulator activity|negative regulation of peptidyl-serine phosphorylation|negative regulation of ERK1 and ERK2 cascade|cytoplasm|plasma membrane|positive regulation of sodium ion transmembrane transporter activity|cell cor…			rno-Cnksr3_0005	http://159.226.67.237:8080/new/circ_detail.php?ID=rno-Cnksr3_0005
circRNA_0096|Chr1:44056456_44061740_+	5285	447	sense-overlapping	XM_006227858.3	Chr1:44017801_44120619_+	Scaf8	GeneID:245926,Genbank:XM_006227858.3,RGD:708362	SR-related CTD-associated factor 8, transcript variant X1	GO:0005681,GO:0006366,GO:0006397,GO:0008380,GO:0016363,GO:0019904,GO:0043175,GO:0070063,GO:0003723,GO:0005654	spliceosomal complex|transcription by RNA polymerase II|mRNA processing|RNA splicing|nuclear matrix|protein domain specific binding|RNA polymerase core enzyme binding|RNA polymerase binding|RNA binding|nucleoplasm			rno-Scaf8_0006	http://159.226.67.237:8080/new/circ_detail.php?ID=rno-Scaf8_0006	RNO_CIRCpedia_6505	ENSRNOT00000065733.3	Scaf8
circRNA_0097|Chr1:44366948_44372134_+	5187	700	sense-overlapping	XM_006227902.3	Chr1:44232520_44433450_+	Tiam2	GeneID:100362710,Genbank:XM_006227902.3,RGD:2324148	T-cell lymphoma invasion and metastasis 2, transcript variant X2	GO:0005096,GO:0005737,GO:0016020,GO:0035023,GO:0035556,GO:0043547,GO:0005057,GO:0005085,GO:0005089	GTPase activator activity|cytoplasm|membrane|regulation of Rho protein signal transduction|intracellular signal transduction|positive regulation of GTPase activity|signal transducer activity, downstream of receptor|guanyl-nucleotide exchange factor activity|Rho guanyl-nucleotide exchange factor activity			rno-Tiam2_0005	http://159.226.67.237:8080/new/circ_detail.php?ID=rno-Tiam2_0005	RNO_CIRCpedia_1627	ENSRNOT00000065386.3	Tiam2
circRNA_0098|Chr1:45923228_46014665_+	91438	456	sense-overlapping	XM_017590420.1	Chr1:45923119_46232301_+	Arid1b	GeneID:282546,Genbank:XM_017590420.1,RGD:708504	AT-rich interaction domain 1B, transcript variant X1	GO:0007270,GO:0003700,GO:0008150,GO:0005575,GO:0016514,GO:0005634,GO:0005654,GO:0005737,GO:0060996,GO:0005829,GO:0071565,GO:0097026,GO:0005886,GO:1904385,GO:0002931,GO:0006338,GO:0003674,GO:0006355,GO:0003677	neuron-neuron synaptic transmission|DNA binding transcription factor activity|biological_process|cellular_component|SWI/SNF complex|nucleus|nucleoplasm|cytoplasm|dendritic spine development|cytosol|nBAF complex|dendritic cell dendrite assembly|plasma membrane|cellular response to angiotensin|response to ischemia|chromatin remodeling|molecular_function|regulation of transcription, DNA-templated|DN…	rno04714,rno05225	Thermogenesis|Hepatocellular carcinoma	rno-Arid1b_0001	http://159.226.67.237:8080/new/circ_detail.php?ID=rno-Arid1b_0001
circRNA_0099|Chr1:46877133_46894154_+	17022	469	sense-overlapping	NM_032071.2	Chr1:46835922_46932544_+	Synj2	GeneID:84018,Genbank:NM_032071.2,RGD:69436	synaptojanin 2, transcript variant 3	GO:0046856,GO:0005515,GO:0005737,GO:0048312,GO:0005881,GO:0007420,GO:0017124,GO:0030165,GO:0048471,GO:0031315,GO:0052744,GO:0032587,GO:0034595,GO:0043679,GO:0003723,GO:0045121,GO:0004439,GO:0046855,GO:0004445	phosphatidylinositol dephosphorylation|protein binding|cytoplasm|intracellular distribution of mitochondria|cytoplasmic microtubule|brain development|SH3 domain binding|PDZ domain binding|perinuclear region of cytoplasm|extrinsic component of mitochondrial outer membrane|phosphatidylinositol monophosphate phosphatase activity|ruffle membrane|phosphatidylinositol phosphate 5-phosphatase activity|a…	rno00562,rno04070	Inositol phosphate metabolism|Phosphatidylinositol signaling system			RNO_CIRCpedia_9402	NM_032071	Synj2
circRNA_0100|Chr1:46923563_46929519_+	5957	371	sense-overlapping	NM_032071.2	Chr1:46835922_46932544_+	Synj2	GeneID:84018,Genbank:NM_032071.2,RGD:69436	synaptojanin 2, transcript variant 3	GO:0046856,GO:0005515,GO:0005737,GO:0048312,GO:0005881,GO:0007420,GO:0017124,GO:0030165,GO:0048471,GO:0031315,GO:0052744,GO:0032587,GO:0034595,GO:0043679,GO:0003723,GO:0045121,GO:0004439,GO:0046855,GO:0004445	phosphatidylinositol dephosphorylation|protein binding|cytoplasm|intracellular distribution of mitochondria|cytoplasmic microtubule|brain development|SH3 domain binding|PDZ domain binding|perinuclear region of cytoplasm|extrinsic component of mitochondrial outer membrane|phosphatidylinositol monophosphate phosphatase activity|ruffle membrane|phosphatidylinositol phosphate 5-phosphatase activity|a…	rno00562,rno04070	Inositol phosphate metabolism|Phosphatidylinositol signaling system	rno-Synj2_0001	http://159.226.67.237:8080/new/circ_detail.php?ID=rno-Synj2_0001
circRNA_0101|Chr1:46959021_46968866_-	9846	887	sense-overlapping	XM_574308.7	Chr1:46934499_46978263_-	Serac1	GeneID:499015,Genbank:XM_574308.7,RGD:1565064	serine active site containing 1, transcript variant X3	GO:0030198,GO:0032367,GO:0036148,GO:0044233,GO:0005578,GO:0005739,GO:0005783	extracellular matrix organization|intracellular cholesterol transport|phosphatidylglycerol acyl-chain remodeling|ER-mitochondrion membrane contact site|proteinaceous extracellular matrix|mitochondrion|endoplasmic reticulum			rno-Serac1_0001	http://159.226.67.237:8080/new/circ_detail.php?ID=rno-Serac1_0001	RNO_CIRCpedia_1630	ENSRNOT00000060527.5	Serac1
circRNA_0102|Chr1:47030544_47032563_+	2020	2020	exonic	XM_008758737.2	Chr1:47002928_47128114_+	Tulp4	GeneID:499016,Genbank:XM_008758737.2,RGD:1564487	tubby like protein 4, transcript variant X3	GO:0035091,GO:0061512,GO:0005737,GO:0005929,GO:0016567	phosphatidylinositol binding|protein localization to cilium|cytoplasm|cilium|protein ubiquitination			rno-Tulp4_0001	http://159.226.67.237:8080/new/circ_detail.php?ID=rno-Tulp4_0001
circRNA_0103|Chr1:47030544_47077979_+	47436	2311	sense-overlapping	XM_008758737.2	Chr1:47002928_47128114_+	Tulp4	GeneID:499016,Genbank:XM_008758737.2,RGD:1564487	tubby like protein 4, transcript variant X3	GO:0035091,GO:0061512,GO:0005737,GO:0005929,GO:0016567	phosphatidylinositol binding|protein localization to cilium|cytoplasm|cilium|protein ubiquitination			rno-RF00001_0003	http://159.226.67.237:8080/new/circ_detail.php?ID=rno-RF00001_0003
circRNA_0104|Chr1:47181478_47185812_+	4335	269	sense-overlapping	NM_001130939.1	Chr1:47162394_47202554_+	Tmem181	GeneID:502228,Genbank:NM_001130939.1,RGD:1566403	transmembrane protein 181	GO:0016021,GO:0009405,GO:0015643	integral component of membrane|pathogenesis|toxic substance binding			rno-Tmem181_0002	http://159.226.67.237:8080/new/circ_detail.php?ID=rno-Tmem181_0002
circRNA_0105|Chr1:47915029_47916946_-	1918	1367	sense-overlapping	NM_017051.2	Chr1:47914757_47921587_-	Sod2	GeneID:24787,Genbank:NM_017051.2,RGD:3732	superoxide dismutase 2, mitochondrial	GO:0003069,GO:0003677,GO:0004784,GO:0005737,GO:0007507,GO:0005739,GO:0007568,GO:0007605,GO:0007626,GO:0008217,GO:0008285,GO:0019430,GO:0008630,GO:0008631,GO:0019825,GO:0008637,GO:0019899,GO:0022904,GO:0030097,GO:0030145,GO:0000302,GO:0042542,GO:0000303,GO:0042554,GO:0001306,GO:0042645,GO:0030335,GO:0001315,GO:0042743,GO:0042802,GO:0001666,GO:0001836,GO:0043066,GO:0001889,GO:0051289,GO:0043209,GO:…	acetylcholine-mediated vasodilation involved in regulation of systemic arterial blood pressure|DNA binding|superoxide dismutase activity|cytoplasm|heart development|mitochondrion|aging|sensory perception of sound|locomotory behavior|regulation of blood pressure|negative regulation of cell proliferation|removal of superoxide radicals|intrinsic apoptotic signaling pathway in response to DNA damage|…	rno04068,rno04146,rno04211,rno04213,rno05016	FoxO signaling pathway|Peroxisome|Longevity regulating pathway - mammal|Longevity regulating pathway - multiple species|Huntington's disease	rno-Sod2_0003	http://159.226.67.237:8080/new/circ_detail.php?ID=rno-Sod2_0003
circRNA_0106|Chr1:47955268_47955414_+	147	147	intronic	NM_001113543.1	Chr1:47942500_47959697_+	Wtap	GeneID:499020,Genbank:NM_001113543.1,RGD:1563824	Wilms tumor 1 associated protein, transcript variant 2	GO:0005634,GO:0005654,GO:0016607,GO:0031965,GO:0036396,GO:0080009,GO:0000381	nucleus|nucleoplasm|nuclear speck|nuclear membrane|RNA N6-methyladenosine methyltransferase complex|mRNA methylation|regulation of alternative mRNA splicing, via spliceosome
circRNA_0107|Chr1:47984746_48022341_+	37596	24571	sense-overlapping	XM_003748697.4	Chr1:48008574_48025730_+	Acat2l1	GeneID:365096,Genbank:XM_003748697.4,RGD:1562948	acetyl-CoA acetyltransferase 2-like 1	GO:0016747	transferase activity, transferring acyl groups other than amino-acyl groups
circRNA_0108|Chr1:48206909_48211406_+	4498	351	sense-overlapping	NM_012756.2	Chr1:48176095_48264482_+	Igf2r	GeneID:25151,Genbank:NM_012756.2,RGD:2871	insulin-like growth factor 2 receptor	GO:0005641,GO:0005768,GO:0005769,GO:0005770,GO:0005794,GO:0030118,GO:0005802,GO:0030139,GO:0030140,GO:0031100,GO:0031995,GO:0032526,GO:0042802,GO:0042981,GO:0043065,GO:0048009,GO:0001889,GO:0001965,GO:0001972,GO:0004930,GO:0005010,GO:0005520,GO:0005537,GO:0005615,GO:0005634,GO:0005886,GO:0007041,GO:0007186,GO:0007283,GO:0009791,GO:0009986,GO:0015031,GO:0048471,GO:0016020,GO:0051219,GO:0016021,GO:…	nuclear envelope lumen|endosome|early endosome|late endosome|Golgi apparatus|clathrin coat|trans-Golgi network|endocytic vesicle|trans-Golgi network transport vesicle|animal organ regeneration|insulin-like growth factor II binding|response to retinoic acid|identical protein binding|regulation of apoptotic process|positive regulation of apoptotic process|insulin-like growth factor receptor signali…	rno04144,rno04142	Endocytosis|Lysosome	rno-Igf2r_0003	http://159.226.67.237:8080/new/circ_detail.php?ID=rno-Igf2r_0003
circRNA_0109|Chr1:48661472_48670160_+	8689	1549	sense-overlapping	XM_006227872.3	Chr1:48625714_48711642_+	Map3k4	GeneID:308106,Genbank:XM_006227872.3,RGD:1311192	mitogen activated protein kinase kinase kinase 4, transcript variant X1	GO:1900745,GO:0023014,GO:0003674,GO:1904355,GO:0031098,GO:0004672,GO:0032147,GO:0004674,GO:0004709,GO:0005524,GO:0005575,GO:0005737,GO:0032212,GO:0035556,GO:0007346,GO:0042981,GO:0008150,GO:0043507,GO:0010225,GO:0000165,GO:0051973,GO:0010468,GO:0000186,GO:0060718,GO:0019100,GO:0001890	positive regulation of p38MAPK cascade|signal transduction by protein phosphorylation|molecular_function|positive regulation of telomere capping|stress-activated protein kinase signaling cascade|protein kinase activity|activation of protein kinase activity|protein serine/threonine kinase activity|MAP kinase kinase kinase activity|ATP binding|cellular_component|cytoplasm|positive regulation of tel…	rno04010,rno04912	MAPK signaling pathway|GnRH signaling pathway	rno-Map3k4_0004	http://159.226.67.237:8080/new/circ_detail.php?ID=rno-Map3k4_0004
circRNA_0110|Chr1:48792572_48797638_-	5067	353	sense-overlapping	XM_006227856.3	Chr1:48716094_48798471_-	Agpat4	GeneID:170919,Genbank:XM_006227856.3,RGD:619916	1-acylglycerol-3-phosphate O-acyltransferase 4, transcript variant X1	GO:0016021,GO:0016024,GO:0016746,GO:0042171,GO:0003841,GO:0005741,GO:0006644	integral component of membrane|CDP-diacylglycerol biosynthetic process|transferase activity, transferring acyl groups|lysophosphatidic acid acyltransferase activity|1-acylglycerol-3-phosphate O-acyltransferase activity|mitochondrial outer membrane|phospholipid metabolic process	rno00561,rno00564,rno04072	Glycerolipid metabolism|Glycerophospholipid metabolism|Phospholipase D signaling pathway	rno-Agpat4_0003	http://159.226.67.237:8080/new/circ_detail.php?ID=rno-Agpat4_0003
circRNA_0111|Chr1:52414237_52444705_-	30469	329	sense-overlapping	NM_022236.1	Chr1:52360296_52544448_-	Pde10a	GeneID:63885,Genbank:NM_022236.1,RGD:68434	phosphodiesterase 10A	GO:0043204,GO:0004118,GO:0043949,GO:0046069,GO:0005737,GO:0006198,GO:0007165,GO:0008144,GO:0010738,GO:0046872,GO:0016020,GO:0047555,GO:0030552,GO:0004112,GO:0030553,GO:0004114,GO:0043025	perikaryon|cGMP-stimulated cyclic-nucleotide phosphodiesterase activity|regulation of cAMP-mediated signaling|cGMP catabolic process|cytoplasm|cAMP catabolic process|signal transduction|drug binding|regulation of protein kinase A signaling|metal ion binding|membrane|3',5'-cyclic-GMP phosphodiesterase activity|cAMP binding|cyclic-nucleotide phosphodiesterase activity|cGMP binding|3',5'-cyclic-nucl…	rno00230,rno05032	Purine metabolism|Morphine addiction	rno-Pde10a_0001	http://159.226.67.237:8080/new/circ_detail.php?ID=rno-Pde10a_0001	RNO_CIRCpedia_1635	NM_022236	Pde10a
circRNA_0112|Chr1:53132723_53136708_-	3986	409	sense-overlapping	XM_008758774.2	Chr1:53122330_53152872_-	Fgfr1op	GeneID:683722,Genbank:XM_008758774.2,RGD:1583370	Fgfr1 oncogene partner, transcript variant X1	GO:0006469,GO:0008284,GO:0019901,GO:0030030,GO:0030292,GO:0030307,GO:0030335,GO:0034453,GO:0042803,GO:0042995,GO:0048471,GO:0005634,GO:0061099,GO:0005813,GO:0005814	negative regulation of protein kinase activity|positive regulation of cell proliferation|protein kinase binding|cell projection organization|protein tyrosine kinase inhibitor activity|positive regulation of cell growth|positive regulation of cell migration|microtubule anchoring|protein homodimerization activity|cell projection|perinuclear region of cytoplasm|nucleus|negative regulation of protein…			rno-Fgfr1op_0001	http://159.226.67.237:8080/new/circ_detail.php?ID=rno-Fgfr1op_0001
circRNA_0113|Chr1:53433883_53441132_+	7250	306	sense-overlapping	XM_017588698.1	Chr1:53219346_53499445_+	Rps6ka2	GeneID:117269,Genbank:XM_017588698.1,RGD:620676	ribosomal protein S6 kinase polypeptide 2, transcript variant X2	GO:0035556,GO:0005840,GO:0004672,GO:0043065,GO:0006468,GO:0004674,GO:0045786,GO:0045835,GO:0004711,GO:0004712,GO:0005524,GO:0007507,GO:0005634,GO:0060047,GO:0008285,GO:0070613,GO:0010628,GO:0005654,GO:0071322,GO:0010659,GO:0005737,GO:0000287,GO:0018105,GO:0001556,GO:0033554,GO:0005819,GO:0002035	intracellular signal transduction|ribosome|protein kinase activity|positive regulation of apoptotic process|protein phosphorylation|protein serine/threonine kinase activity|negative regulation of cell cycle|negative regulation of meiotic nuclear division|ribosomal protein S6 kinase activity|protein serine/threonine/tyrosine kinase activity|ATP binding|heart development|nucleus|heart contraction|n…	rno04010,rno04150,rno04114,rno04914,rno04720,rno04722,rno04714,rno04931	MAPK signaling pathway|mTOR signaling pathway|Oocyte meiosis|Progesterone-mediated oocyte maturation|Long-term potentiation|Neurotrophin signaling pathway|Thermogenesis|Insulin resistance	rno-Rps6ka2_0003	http://159.226.67.237:8080/new/circ_detail.php?ID=rno-Rps6ka2_0003
circRNA_0114|Chr1:53788308_53802658_-	14351	801	sense-overlapping	NM_013217.2	Chr1:53713873_53861918_-	Afdn	GeneID:26955,Genbank:NM_013217.2,RGD:708561	afadin, adherens junction formation factor	GO:0005913,GO:0007155,GO:0007165,GO:0016607,GO:0045177,GO:0017016,GO:0021537,GO:0045296,GO:0021987,GO:0048854,GO:0048872,GO:0050839,GO:0005515,GO:0005654,GO:0005737,GO:0005829,GO:0005886,GO:0005911,GO:0005912,GO:0030054,GO:0030274,GO:0032880,GO:0034332,GO:0034334,GO:0060019,GO:0043296,GO:0060563,GO:0043547,GO:0070445,GO:0090557,GO:1902414	cell-cell adherens junction|cell adhesion|signal transduction|nuclear speck|apical part of cell|Ras GTPase binding|telencephalon development|cadherin binding|cerebral cortex development|brain morphogenesis|homeostasis of number of cells|cell adhesion molecule binding|protein binding|nucleoplasm|cytoplasm|cytosol|plasma membrane|cell-cell junction|adherens junction|cell junction|LIM domain binding…	rno04014,rno04015,rno04024,rno04520,rno04530,rno04670	Ras signaling pathway|Rap1 signaling pathway|cAMP signaling pathway|Adherens junction|Tight junction|Leukocyte transendothelial migration	rno-Afdn_0001	http://159.226.67.237:8080/new/circ_detail.php?ID=rno-Afdn_0001	RNO_CIRCpedia_6507	NM_013217	Afdn
circRNA_0115|Chr1:56366809_56370833_+	4025	419	sense-overlapping	XM_006227958.2	Chr1:56242289_56374106_+	Smoc2	GeneID:292401,Genbank:XM_006227958.2,RGD:1306681	SPARC related modular calcium binding 2, transcript variant X1	GO:0005604,GO:0005614,GO:0007165,GO:0008201,GO:0010811,GO:0030198,GO:0005509,GO:0005539,GO:0005578	basement membrane|interstitial matrix|signal transduction|heparin binding|positive regulation of cell-substrate adhesion|extracellular matrix organization|calcium ion binding|glycosaminoglycan binding|proteinaceous extracellular matrix			rno-Smoc2_0002	http://159.226.67.237:8080/new/circ_detail.php?ID=rno-Smoc2_0002
circRNA_0116|Chr1:57709952_57712920_+	2969	381	sense-overlapping	NM_001107465.1	Chr1:57692828_57756762_+	Chd1	GeneID:308215,Genbank:NM_001107465.1,RGD:1306794	chromodomain helicase DNA binding protein 1	GO:0005524,GO:0005575,GO:0005634,GO:0005737,GO:0006338,GO:0008150,GO:0016569,GO:0035064,GO:0043923,GO:0001650,GO:0003674	ATP binding|cellular_component|nucleus|cytoplasm|chromatin remodeling|biological_process|covalent chromatin modification|methylated histone binding|positive regulation by host of viral transcription|fibrillar center|molecular_function			rno-Chd1_0002	http://159.226.67.237:8080/new/circ_detail.php?ID=rno-Chd1_0002	RNO_CIRCpedia_7544	NM_001107465	Chd1
circRNA_0117|Chr1:57742000_57744248_+	2249	393	sense-overlapping	NM_001107465.1	Chr1:57692828_57756762_+	Chd1	GeneID:308215,Genbank:NM_001107465.1,RGD:1306794	chromodomain helicase DNA binding protein 1	GO:0005524,GO:0005575,GO:0005634,GO:0005737,GO:0006338,GO:0008150,GO:0016569,GO:0035064,GO:0043923,GO:0001650,GO:0003674	ATP binding|cellular_component|nucleus|cytoplasm|chromatin remodeling|biological_process|covalent chromatin modification|methylated histone binding|positive regulation by host of viral transcription|fibrillar center|molecular_function			rno-Chd1_0005	http://159.226.67.237:8080/new/circ_detail.php?ID=rno-Chd1_0005	RNO_CIRCpedia_5074	NM_001107465	Chd1
circRNA_0118|Chr1:61388743_61406321_+	17579	1958	sense-overlapping	XM_017589343.1	Chr1:61389594_61426289_+	Zfp52	GeneID:361487,Genbank:XM_017589343.1,RGD:1359149	zinc finger protein 52, transcript variant X1	GO:0046872,GO:0003676,GO:0005622,GO:0006355	metal ion binding|nucleic acid binding|intracellular|regulation of transcription, DNA-templated			rno-Zfp52_0001	http://159.226.67.237:8080/new/circ_detail.php?ID=rno-Zfp52_0001
circRNA_0119|Chr1:62534465_62541278_-	6814	6814	intergenic
circRNA_0120|Chr1:62837077_62851744_+	14668	1598	sense-overlapping	NM_001099655.1	Chr1:62837021_62855155_+	Vom2r16	GeneID:690691,Genbank:NM_001099655.1,RGD:1593384	vomeronasal 2 receptor, 16	GO:0005887,GO:0007186,GO:0016021,GO:0004930,GO:0005886	integral component of plasma membrane|G-protein coupled receptor signaling pathway|integral component of membrane|G-protein coupled receptor activity|plasma membrane
circRNA_0121|Chr1:63714184_63760774_+	46591	43533	sense-overlapping	XM_017589919.1	Chr1:63711363_63721987_+	RGD1562625	GeneID:502291,Genbank:XM_017589919.1,RGD:1562625	similar to killer activatory receptor-like protein p91D, transcript variant X3
circRNA_0122|Chr1:63736954_63760774_+	23821	20634	sense-overlapping	NM_031713.1	Chr1:63734135_63741986_+	Pirb	GeneID:65146,Genbank:NM_031713.1,RGD:70895	paired Ig-like receptor B	GO:0106003,GO:0042102,GO:0002666,GO:0042130,GO:0002767,GO:0042288,GO:0002774,GO:0005615,GO:0005737,GO:0005886,GO:0007165,GO:0042803,GO:0008157,GO:0044877,GO:0009986,GO:0045591,GO:0016021,GO:0050839,GO:0023029,GO:0001540,GO:0051926,GO:0032396,GO:0002578,GO:0071222,GO:0034113,GO:0002645	amyloid-beta complex|positive regulation of T cell proliferation|positive regulation of T cell tolerance induction|negative regulation of T cell proliferation|immune response-inhibiting cell surface receptor signaling pathway|MHC class I protein binding|Fc receptor mediated inhibitory signaling pathway|extracellular space|cytoplasm|plasma membrane|signal transduction|protein homodimerization acti…	rno04662,rno04380	B cell receptor signaling pathway|Osteoclast differentiation
circRNA_0123|Chr1:63778610_63845033_+	66424	65050	sense-overlapping	NM_001037357.2	Chr1:63759638_63849063_+	Lilrb3l	GeneID:361493,Genbank:NM_001037357.2,RGD:1307219	leukocyte immunoglobulin-like receptor, subfamily B (with TM and ITIM domains), member 3-like			rno04380	Osteoclast differentiation
circRNA_0124|Chr1:63778610_63845185_+	66576	65202	sense-overlapping	NM_001037357.2	Chr1:63759638_63849063_+	Lilrb3l	GeneID:361493,Genbank:NM_001037357.2,RGD:1307219	leukocyte immunoglobulin-like receptor, subfamily B (with TM and ITIM domains), member 3-like			rno04380	Osteoclast differentiation
circRNA_0125|Chr1:63842808_63920657_+	77850	73780	sense-overlapping	XM_006228033.2	Chr1:63842340_63848880_+	Lilrb3l	GeneID:361493,Genbank:XM_006228033.2,RGD:1307219	leukocyte immunoglobulin-like receptor, subfamily B (with TM and ITIM domains), member 3-like, transcript variant X3			rno04380	Osteoclast differentiation	rno-Lilrb3a_0007	http://159.226.67.237:8080/new/circ_detail.php?ID=rno-Lilrb3a_0007
circRNA_0126|Chr1:64133551_64133941_-	391	299	sense-overlapping	NM_001107471.2	Chr1:64130823_64147066_-	Cnot3	GeneID:308311,Genbank:NM_001107471.2,RGD:1304771	CCR4-NOT transcription complex, subunit 3	GO:0001829,GO:0003674,GO:0005575,GO:0005634,GO:0006355,GO:0008150,GO:0017148,GO:0030014,GO:0030015,GO:2000036,GO:0000288,GO:0000932	trophectodermal cell differentiation|molecular_function|cellular_component|nucleus|regulation of transcription, DNA-templated|biological_process|negative regulation of translation|CCR4-NOT complex|CCR4-NOT core complex|regulation of stem cell population maintenance|nuclear-transcribed mRNA catabolic process, deadenylation-dependent decay|P-body	rno03018	RNA degradation	rno-Cnot3_0004	http://159.226.67.237:8080/new/circ_detail.php?ID=rno-Cnot3_0004
circRNA_0127|Chr1:64721466_64732312_+	10847	10847	sense-overlapping	XM_017589927.1	Chr1:64721939_64749676_+	LOC103691005	GeneID:103691005,Genbank:XM_017589927.1,RGD:9163837	zinc finger protein 679-like, transcript variant X2	GO:0046872,GO:0003676,GO:0005622,GO:0006355	metal ion binding|nucleic acid binding|intracellular|regulation of transcription, DNA-templated
circRNA_0128|Chr1:65115127_65166133_-	51007	51007	antisense										rno-Vom2r80_0001	http://159.226.67.237:8080/new/circ_detail.php?ID=rno-Vom2r80_0001
circRNA_0129|Chr1:65850468_65852263_+	1796	1796	exonic	XM_008758843.2	Chr1:65845274_65858966_+	Zscan18	GeneID:499083,Genbank:XM_008758843.2,RGD:1560671	zinc finger and SCAN domain containing 18, transcript variant X1					rno-AABR07002068_0001	http://159.226.67.237:8080/new/circ_detail.php?ID=rno-AABR07002068_0001
circRNA_0130|Chr1:72302573_72308741_-	6169	580	sense-overlapping	NM_057136.1	Chr1:72294153_72310217_-	Epn1	GeneID:117277,Genbank:NM_057136.1,RGD:619772	Epsin 1	GO:0098890,GO:0031234,GO:0005634,GO:1903671,GO:0035615,GO:0005829,GO:0043195,GO:1905445,GO:0005905,GO:0006897,GO:0006898,GO:0044325,GO:0007219,GO:0048568,GO:0007565,GO:0098793,GO:0001701,GO:0098794,GO:0008134,GO:0098888,GO:0008289,GO:0005515	extrinsic component of postsynaptic membrane|extrinsic component of cytoplasmic side of plasma membrane|nucleus|negative regulation of sprouting angiogenesis|clathrin adaptor activity|cytosol|terminal bouton|positive regulation of clathrin coat assembly|clathrin-coated pit|endocytosis|receptor-mediated endocytosis|ion channel binding|Notch signaling pathway|embryonic organ development|female preg…	rno04144	Endocytosis	rno-Epn1_0002	http://159.226.67.237:8080/new/circ_detail.php?ID=rno-Epn1_0002
circRNA_0131|Chr1:72317544_72321634_-	4091	219	sense-overlapping	XM_003748763.4	Chr1:72312260_72329828_-	U2af2	GeneID:308335,Genbank:XM_003748763.4,RGD:1310690	U2 small nuclear RNA auxiliary factor 2, transcript variant X1	GO:0031397,GO:0003674,GO:0033120,GO:0003723,GO:0048025,GO:0005575,GO:0005634,GO:0005681,GO:0008150,GO:0008187,GO:0070742,GO:0008380,GO:0071004,GO:0016607,GO:0089701,GO:0019899,GO:0000243,GO:0030628,GO:0000398,GO:0000974	negative regulation of protein ubiquitination|molecular_function|positive regulation of RNA splicing|RNA binding|negative regulation of mRNA splicing, via spliceosome|cellular_component|nucleus|spliceosomal complex|biological_process|poly-pyrimidine tract binding|C2H2 zinc finger domain binding|RNA splicing|U2-type prespliceosome|nuclear speck|U2AF|enzyme binding|commitment complex|pre-mRNA 3'-sp…	rno03040	Spliceosome	rno-U2af2_0001	http://159.226.67.237:8080/new/circ_detail.php?ID=rno-U2af2_0001	RNO_CIRCpedia_5076	ENSRNOT00000021391.6	U2af2
circRNA_0132|Chr1:72358337_72360751_+	2415	2415	sense-overlapping	NM_001134544.1	Chr1:72356880_72361358_+	Zfp865	GeneID:308337,Genbank:NM_001134544.1,RGD:1565545	zinc finger protein 865	GO:0002244,GO:0003676	hematopoietic progenitor cell differentiation|nucleic acid binding			rno-Zfp865_0001	http://159.226.67.237:8080/new/circ_detail.php?ID=rno-Zfp865_0001
circRNA_0133|Chr1:72537392_72539371_+	1980	540	sense-overlapping	NM_001008367.1	Chr1:72524569_72545330_+	Isoc2b	GeneID:361501,Genbank:NM_001008367.1,RGD:1309062	isochorismatase domain containing 2b	GO:0005737,GO:0031648,GO:0003824,GO:0005634	cytoplasm|protein destabilization|catalytic activity|nucleus			rno-Isoc2b_0001	http://159.226.67.237:8080/new/circ_detail.php?ID=rno-Isoc2b_0001	RNO_CIRCpedia_1648	ENSRNOT00000022620.3	Isoc2b
circRNA_0134|Chr1:72957031_72960329_+	3299	1886	sense-overlapping	NM_001108468.1	Chr1:72956017_72983811_+	Rdh13	GeneID:361504,Genbank:NM_001108468.1,RGD:1304959	retinol dehydrogenase 13 (all-trans/9-cis)	GO:0042462,GO:0055114,GO:0009644,GO:0010842,GO:0016491	eye photoreceptor cell development|oxidation-reduction process|response to high light intensity|retina layer formation|oxidoreductase activity			rno-Rdh13_0003	http://159.226.67.237:8080/new/circ_detail.php?ID=rno-Rdh13_0003
circRNA_0135|Chr1:72975360_72980019_+	4660	420	sense-overlapping	NM_001108468.1	Chr1:72956017_72983811_+	Rdh13	GeneID:361504,Genbank:NM_001108468.1,RGD:1304959	retinol dehydrogenase 13 (all-trans/9-cis)	GO:0042462,GO:0055114,GO:0009644,GO:0010842,GO:0016491	eye photoreceptor cell development|oxidation-reduction process|response to high light intensity|retina layer formation|oxidoreductase activity			rno-Rdh13_0005	http://159.226.67.237:8080/new/circ_detail.php?ID=rno-Rdh13_0005
circRNA_0136|Chr1:73736838_73737496_-	659	263	sense-overlapping	XM_006228216.3	Chr1:73734614_73753157_-	Ttyh1	GeneID:292597,Genbank:XM_006228216.3,RGD:1310103	tweety family member 1, transcript variant X3	GO:0005886,GO:0006821,GO:0030868,GO:0031527,GO:0031589,GO:0032433,GO:0034707,GO:0046847,GO:0072320,GO:0000278,GO:0098609,GO:0005229,GO:1902476,GO:0005509	plasma membrane|chloride transport|smooth endoplasmic reticulum membrane|filopodium membrane|cell-substrate adhesion|filopodium tip|chloride channel complex|filopodium assembly|volume-sensitive chloride channel activity|mitotic cell cycle|cell-cell adhesion|intracellular calcium activated chloride channel activity|chloride transmembrane transport|calcium ion binding			rno-Ttyh1_0002	http://159.226.67.237:8080/new/circ_detail.php?ID=rno-Ttyh1_0002
circRNA_0137|Chr1:77847267_77855727_-	8461	1775	sense-overlapping	NM_001024897.1	Chr1:77847599_77865870_-	Ehd2	GeneID:361512,Genbank:NM_001024897.1,RGD:1560856	EH-domain containing 2	GO:0055038,GO:0019904,GO:0005829,GO:0072659,GO:0030866,GO:0032456,GO:0005886,GO:0097320,GO:0005901,GO:0006897,GO:0015630,GO:0042802,GO:1901741,GO:0045171,GO:0016020,GO:0016787,GO:0005509,GO:2001137,GO:0048471,GO:0019898,GO:0005524,GO:0005525	recycling endosome membrane|protein domain specific binding|cytosol|protein localization to plasma membrane|cortical actin cytoskeleton organization|endocytic recycling|plasma membrane|plasma membrane tubulation|caveola|endocytosis|microtubule cytoskeleton|identical protein binding|positive regulation of myoblast fusion|intercellular bridge|membrane|hydrolase activity|calcium ion binding|positive…	rno04144	Endocytosis
circRNA_0138|Chr1:77872644_77874388_-	1745	409	sense-overlapping	NM_001106226.2	Chr1:77869020_77893509_-	Gltscr1	GeneID:292622,Genbank:NM_001106226.2,RGD:1306385	glioma tumor suppressor candidate region gene 1					rno-Bicra_0001	http://159.226.67.237:8080/new/circ_detail.php?ID=rno-Bicra_0001	RNO_CIRCpedia_1650	NM_001106226	Bicra
circRNA_0139|Chr1:78018827_78020623_+	1797	1797	intergenic										rno-Kptn_0001	http://159.226.67.237:8080/new/circ_detail.php?ID=rno-Kptn_0001
circRNA_0140|Chr1:78369712_78370333_+	622	331	sense-overlapping	XM_006228486.3	Chr1:78352833_78390906_+	Zc3h4	GeneID:678741,Genbank:XM_006228486.3,RGD:1596943	zinc finger CCCH-type containing 4, transcript variant X5	GO:0005654,GO:0005829,GO:0006357,GO:0045892,GO:0046872,GO:0001162,GO:0003700,GO:0005634	nucleoplasm|cytosol|regulation of transcription by RNA polymerase II|negative regulation of transcription, DNA-templated|metal ion binding|RNA polymerase II intronic transcription regulatory region sequence-specific DNA binding|DNA binding transcription factor activity|nucleus			rno-Zc3h4_0001	http://159.226.67.237:8080/new/circ_detail.php?ID=rno-Zc3h4_0001	RNO_CIRCpedia_1654	ENSRNOT00000020509.6	Zc3h4
circRNA_0141|Chr1:78518319_78522187_-	3869	3869	exonic	NM_001271132.1	Chr1:78456409_78573374_-	Arhgap35	GeneID:306400,Genbank:NM_001271132.1,RGD:1308738	Rho GTPase activating protein 35	GO:0005096,GO:0005525,GO:0005543,GO:0007413,GO:0005634,GO:0008064,GO:0005737,GO:0008360,GO:0030900,GO:0010976,GO:0030950,GO:0031668,GO:0000122,GO:0043116,GO:0043547,GO:0032794,GO:0000977,GO:0032956,GO:0044319,GO:0001227,GO:0001843,GO:0044877,GO:0045724,GO:0003924,GO:0005829,GO:0005886,GO:0006351,GO:0007165,GO:0007411,GO:0015629,GO:0016477,GO:0021955,GO:0030879,GO:0035024,GO:0036064,GO:0043010,GO:…	GTPase activator activity|GTP binding|phospholipid binding|axonal fasciculation|nucleus|regulation of actin polymerization or depolymerization|cytoplasm|regulation of cell shape|forebrain development|positive regulation of neuron projection development|establishment or maintenance of actin cytoskeleton polarity|cellular response to extracellular stimulus|negative regulation of transcription by RN…	rno04510,rno04810,rno04611,rno04670	Focal adhesion|Regulation of actin cytoskeleton|Platelet activation|Leukocyte transendothelial migration	rno-Arhgap35_0001	http://159.226.67.237:8080/new/circ_detail.php?ID=rno-Arhgap35_0001	RNO_CIRCpedia_1655	NM_001271132	Arhgap35
circRNA_0142|Chr1:79807301_79810373_-	3073	397	sense-overlapping	NM_001106229.1	Chr1:79796557_79816536_-	Ccdc61	GeneID:292680,Genbank:NM_001106229.1,RGD:1307390	coiled-coil domain containing 61	GO:0005813	centrosome			rno-Ccdc61_0001	http://159.226.67.237:8080/new/circ_detail.php?ID=rno-Ccdc61_0001	RNO_CIRCpedia_6513	ENSRNOT00000018495.6	Ccdc61
circRNA_0143|Chr1:80051932_80052296_-	365	253	sense-overlapping	XM_006228402.3	Chr1:80046975_80057022_-	Qpctl	GeneID:292687,Genbank:XM_006228402.3,RGD:1308128	glutaminyl-peptide cyclotransferase-like, transcript variant X1	GO:0016021,GO:0016603,GO:0017186,GO:0005794,GO:0008270	integral component of membrane|glutaminyl-peptide cyclotransferase activity|peptidyl-pyroglutamic acid biosynthetic process, using glutaminyl-peptide cyclotransferase|Golgi apparatus|zinc ion binding			rno-Qpctl_0001	http://159.226.67.237:8080/new/circ_detail.php?ID=rno-Qpctl_0001
circRNA_0144|Chr1:80097757_80106150_+	8394	512	sense-overlapping	NM_138921.1	Chr1:80087684_80118784_+	Eml2	GeneID:192360,Genbank:NM_138921.1,RGD:621066	echinoderm microtubule associated protein like 2	GO:0072686,GO:0005737,GO:0005874,GO:0008017,GO:0008022,GO:0010968,GO:0015630,GO:0015631,GO:0000226,GO:0031115,GO:0003824,GO:0005102	mitotic spindle|cytoplasm|microtubule|microtubule binding|protein C-terminus binding|regulation of microtubule nucleation|microtubule cytoskeleton|tubulin binding|microtubule cytoskeleton organization|negative regulation of microtubule polymerization|catalytic activity|signaling receptor binding			rno-Eml2_0006	http://159.226.67.237:8080/new/circ_detail.php?ID=rno-Eml2_0006	RNO_CIRCpedia_9412	NM_138921	Eml2
circRNA_0145|Chr1:80443035_80446422_-	3388	785	sense-overlapping	NM_001107482.1	Chr1:80439718_80471527_-	Ppp1r37	GeneID:308398,Genbank:NM_001107482.1,RGD:1595870	protein phosphatase 1, regulatory subunit 37	GO:0032515,GO:0004864,GO:0010923	negative regulation of phosphoprotein phosphatase activity|protein phosphatase inhibitor activity|negative regulation of phosphatase activity			rno-Ppp1r37_0001	http://159.226.67.237:8080/new/circ_detail.php?ID=rno-Ppp1r37_0001
circRNA_0146|Chr1:80558031_80561322_-	3292	401	sense-overlapping	NM_001106232.1	Chr1:80549051_80580665_-	Clptm1	GeneID:292696,Genbank:NM_001106232.1,RGD:1310959	cleft lip and palate associated transmembrane protein 1	GO:0005887,GO:0009897,GO:0033081	integral component of plasma membrane|external side of plasma membrane|regulation of T cell differentiation in thymus			rno-Clptm1_0001	http://159.226.67.237:8080/new/circ_detail.php?ID=rno-Clptm1_0001	RNO_CIRCpedia_6514	ENSRNOT00000024779.6	Clptm1
circRNA_0147|Chr1:80560365_80561322_-	958	283	sense-overlapping	NM_001106232.1	Chr1:80549051_80580665_-	Clptm1	GeneID:292696,Genbank:NM_001106232.1,RGD:1310959	cleft lip and palate associated transmembrane protein 1	GO:0005887,GO:0009897,GO:0033081	integral component of plasma membrane|external side of plasma membrane|regulation of T cell differentiation in thymus			rno-Clptm1_0002	http://159.226.67.237:8080/new/circ_detail.php?ID=rno-Clptm1_0002
circRNA_0148|Chr1:80655201_80655563_-	363	363	exonic	NM_001012064.1	Chr1:80631449_80666585_-	Nectin2	GeneID:308417,Genbank:NM_001012064.1,RGD:1309505	nectin cell adhesion molecule 2	GO:0005913,GO:0005915,GO:0007010,GO:0007156,GO:0007157,GO:0007286,GO:0042802,GO:0007289,GO:0042803,GO:0008037,GO:0008150,GO:0043296,GO:0044291,GO:0044406,GO:0044782,GO:0045954,GO:0046596,GO:0046814,GO:0001675,GO:0002860,GO:0002891,GO:0003674,GO:0005102,GO:0005886,GO:0005887,GO:0005911,GO:0009566,GO:0009986,GO:0016021,GO:0019064,GO:0030382,GO:0032990,GO:0033005,GO:0046982,GO:0038023,GO:0050839,GO:…	cell-cell adherens junction|zonula adherens|cytoskeleton organization|homophilic cell adhesion via plasma membrane adhesion molecules|heterophilic cell-cell adhesion via plasma membrane cell adhesion molecules|spermatid development|identical protein binding|spermatid nucleus differentiation|protein homodimerization activity|cell recognition|biological_process|apical junction complex|cell-cell con…	rno04514,rno04520,rno05168	Cell adhesion molecules (CAMs)|Adherens junction|Herpes simplex infection	rno-Nectin2_0001	http://159.226.67.237:8080/new/circ_detail.php?ID=rno-Nectin2_0001
circRNA_0149|Chr1:80828696_80831295_-	2600	415	sense-overlapping	NM_017076.2	Chr1:80820306_80835712_-	PVR	GeneID:25066,Genbank:NM_017076.2,RGD:3813	poliovirus receptor	GO:0045954,GO:0005102,GO:0046718,GO:0005886,GO:0050839,GO:0005913,GO:0007156,GO:0007157,GO:0008037,GO:0009986,GO:0016021,GO:0060370,GO:0016477,GO:0042271,GO:0098609,GO:0001618,GO:0042803,GO:0002860,GO:0045503	positive regulation of natural killer cell mediated cytotoxicity|signaling receptor binding|viral entry into host cell|plasma membrane|cell adhesion molecule binding|cell-cell adherens junction|homophilic cell adhesion via plasma membrane adhesion molecules|heterophilic cell-cell adhesion via plasma membrane cell adhesion molecules|cell recognition|cell surface|integral component of membrane|susc…	rno04514	Cell adhesion molecules (CAMs)	rno-PVR_0001	http://159.226.67.237:8080/new/circ_detail.php?ID=rno-PVR_0001
circRNA_0150|Chr1:81437928_81438850_+	923	416	sense-overlapping	XM_017589798.1	Chr1:81412635_81441676_+	Xrcc1	GeneID:84495,Genbank:XM_017589798.1,RGD:619823	X-ray repair cross complementing 1, transcript variant X3	GO:0070522,GO:0010836,GO:0001666,GO:1903518,GO:0019899,GO:0005515,GO:1904877,GO:0021587,GO:0005634,GO:1905765,GO:0005730,GO:0006281,GO:0021766,GO:0006284,GO:1990414,GO:0032356,GO:1990599,GO:0033194,GO:0042493,GO:0006303,GO:0000012,GO:0050882,GO:0006974,GO:0000784,GO:0061819,GO:0010033,GO:0000790	ERCC4-ERCC1 complex|negative regulation of protein ADP-ribosylation|response to hypoxia|positive regulation of single strand break repair|enzyme binding|protein binding|positive regulation of DNA ligase activity|cerebellum morphogenesis|nucleus|negative regulation of protection from non-homologous end joining at telomere|nucleolus|DNA repair|hippocampus development|base-excision repair|replicatio…	rno03410	Base excision repair	rno-Xrcc1_0001	http://159.226.67.237:8080/new/circ_detail.php?ID=rno-Xrcc1_0001	RNO_CIRCpedia_1660	ENSRNOT00000027057.5	Xrcc1
circRNA_0151|Chr1:81460742_81465116_-	4375	4375	antisense	NM_001106234.1	Chr1:81457008_81472061_+	Ethe1	GeneID:292710,Genbank:NM_001106234.1,RGD:1311034	ETHE1, persulfide dioxygenase	GO:0005737,GO:0005739,GO:0006749,GO:0016788,GO:0050313,GO:0055114,GO:0070813,GO:0005506,GO:0005654	cytoplasm|mitochondrion|glutathione metabolic process|hydrolase activity, acting on ester bonds|sulfur dioxygenase activity|oxidation-reduction process|hydrogen sulfide metabolic process|iron ion binding|nucleoplasm	rno00920	Sulfur metabolism
circRNA_0152|Chr1:81783691_81788403_+	4713	1042	sense-overlapping	NM_021694.3	Chr1:81769212_81797237_+	Arhgef1	GeneID:60323,Genbank:NM_021694.3,RGD:620951	Rho guanine nucleotide exchange factor 1	GO:0005737,GO:0005829,GO:0005886,GO:0007186,GO:0016020,GO:0035023,GO:0043547,GO:0060548,GO:0001664,GO:0005089,GO:0005096	cytoplasm|cytosol|plasma membrane|G-protein coupled receptor signaling pathway|membrane|regulation of Rho protein signal transduction|positive regulation of GTPase activity|negative regulation of cell death|G-protein coupled receptor binding|Rho guanyl-nucleotide exchange factor activity|GTPase activator activity	rno04810,rno04611,rno04270,rno05200,rno05205	Regulation of actin cytoskeleton|Platelet activation|Vascular smooth muscle contraction|Pathways in cancer|Proteoglycans in cancer	rno-Arhgef1_0005	http://159.226.67.237:8080/new/circ_detail.php?ID=rno-Arhgef1_0005
circRNA_0153|Chr1:82155654_82156692_+	1039	533	sense-overlapping	XM_008758934.2	Chr1:82135440_82163007_+	Cic	GeneID:308435,Genbank:XM_008758934.2,RGD:1310706	capicua transcriptional repressor, transcript variant X2	GO:0003682,GO:0005634,GO:0005654,GO:0007420,GO:0007612,GO:0007613,GO:0032991,GO:0035176,GO:0043231,GO:0045892,GO:0000122,GO:0048286,GO:0003677	chromatin binding|nucleus|nucleoplasm|brain development|learning|memory|protein-containing complex|social behavior|intracellular membrane-bounded organelle|negative regulation of transcription, DNA-templated|negative regulation of transcription by RNA polymerase II|lung alveolus development|DNA binding			rno-Cic_0002	http://159.226.67.237:8080/new/circ_detail.php?ID=rno-Cic_0002
circRNA_0154|Chr1:82603116_82606631_+	3516	1595	antisense	NM_001107495.1	Chr1:82595211_82610350_-	Cyp2s1	GeneID:308445,Genbank:NM_001107495.1,RGD:1306078	cytochrome P450, family 2, subfamily s, polypeptide 1	GO:0042738,GO:0005783,GO:0043231,GO:0006082,GO:0006805,GO:0008150,GO:0008392,GO:0008395,GO:0055114,GO:0016021,GO:0016712,GO:0019373,GO:0003674,GO:0020037,GO:0005506,GO:0005737	exogenous drug catabolic process|endoplasmic reticulum|intracellular membrane-bounded organelle|organic acid metabolic process|xenobiotic metabolic process|biological_process|arachidonic acid epoxygenase activity|steroid hydroxylase activity|oxidation-reduction process|integral component of membrane|oxidoreductase activity, acting on paired donors, with incorporation or reduction of molecular oxy…	rno00830,rno00980	Retinol metabolism|Metabolism of xenobiotics by cytochrome P450	rno-Cyp2s1_0002	http://159.226.67.237:8080/new/circ_detail.php?ID=rno-Cyp2s1_0002
circRNA_0155|Chr1:83970562_83971110_-	549	190	sense-overlapping	XM_006228574.3	Chr1:83969456_83976452_-	Egln2	GeneID:308457,Genbank:XM_006228574.3,RGD:631376	egl-9 family hypoxia-inducible factor 2, transcript variant X1	GO:0005634,GO:0005654,GO:0016706,GO:0018401,GO:0019826,GO:0031418,GO:0031545,GO:0043523,GO:0045454,GO:0001666,GO:0045732,GO:0005506,GO:0055114	nucleus|nucleoplasm|oxidoreductase activity, acting on paired donors, with incorporation or reduction of molecular oxygen, 2-oxoglutarate as one donor, and incorporation of one atom each of oxygen into both donors|peptidyl-proline hydroxylation to 4-hydroxy-L-proline|oxygen sensor activity|L-ascorbic acid binding|peptidyl-proline 4-dioxygenase activity|regulation of neuron apoptotic process|cell …	rno04066,rno05200,rno05211	HIF-1 signaling pathway|Pathways in cancer|Renal cell carcinoma
circRNA_0156|Chr1:84060848_84061187_+	340	250	sense-overlapping	XM_017589119.1	Chr1:84043487_84067065_+	Adck4	GeneID:308453,Genbank:XM_017589119.1,RGD:1311356	aarF domain containing kinase 4, transcript variant X1	GO:0031314,GO:0005739,GO:0031966,GO:0005829,GO:0005886,GO:0006468,GO:0006744,GO:0016021,GO:0016301,GO:0004672,GO:0021692,GO:0005524	extrinsic component of mitochondrial inner membrane|mitochondrion|mitochondrial membrane|cytosol|plasma membrane|protein phosphorylation|ubiquinone biosynthetic process|integral component of membrane|kinase activity|protein kinase activity|cerebellar Purkinje cell layer morphogenesis|ATP binding			rno-Coq8b_0001	http://159.226.67.237:8080/new/circ_detail.php?ID=rno-Coq8b_0001	RNO_CIRCpedia_1661	NM_001012065	Coq8b
circRNA_0157|Chr1:84418344_84431239_+	12896	505	sense-overlapping	XM_008759108.2	Chr1:84413060_84451223_+	Akt2	GeneID:25233,Genbank:XM_008759108.2,RGD:2082	AKT serine/threonine kinase 2, transcript variant X1	GO:2001275,GO:0005080,GO:0005515,GO:0005524,GO:0005634,GO:0006006,GO:0005654,GO:0006417,GO:0005769,GO:0006468,GO:0005829,GO:0006970,GO:0014850,GO:0008284,GO:0018105,GO:0030335,GO:0008286,GO:0031340,GO:0001934,GO:0032869,GO:0031667,GO:0032870,GO:0031982,GO:0004672,GO:0032991,GO:0004674,GO:0033119,GO:0033138,GO:0046326,GO:0035556,GO:0046872,GO:0043066,GO:0050927,GO:0065002,GO:0071407,GO:0071486,GO:…	positive regulation of glucose import in response to insulin stimulus|protein kinase C binding|protein binding|ATP binding|nucleus|glucose metabolic process|nucleoplasm|regulation of translation|early endosome|protein phosphorylation|cytosol|response to osmotic stress|response to muscle activity|positive regulation of cell proliferation|peptidyl-serine phosphorylation|positive regulation of cell …	rno04014,rno04015,rno04010,rno04012,rno04370,rno04371,rno04630,rno04668,rno04066,rno04068,rno04072,rno04071,rno04024,rno04022,rno04151,rno04152,rno04150,rno04140,rno04210,rno04218,rno04510,rno04550,rno04611,rno04620,rno04625,rno04660,rno04662,rno04664,rno04666,rno04062,rno04910,rno04922,rno04923,rno04920,rno04915,rno04914,rno04917,rno04926,rno04919,rno04261,rno04973,rno04725,rno04728,rno04722,rno…	Ras signaling pathway|Rap1 signaling pathway|MAPK signaling pathway|ErbB signaling pathway|VEGF signaling pathway|Apelin signaling pathway|Jak-STAT signaling pathway|TNF signaling pathway|HIF-1 signaling pathway|FoxO signaling pathway|Phospholipase D signaling pathway|Sphingolipid signaling pathway|cAMP signaling pathway|cGMP - PKG signaling pathway|PI3K-Akt signaling pathway|AMPK signaling pathw…	rno-Akt2_0001	http://159.226.67.237:8080/new/circ_detail.php?ID=rno-Akt2_0001	RNO_CIRCpedia_1664	NM_017093	Akt2
circRNA_0158|Chr1:84542396_84615182_+	72787	64408	sense-overlapping	XM_017590023.1	Chr1:84576110_84656464_+	LOC100910046	GeneID:100910046,Genbank:XM_017590023.1,RGD:6500398	zinc finger protein 60-like, transcript variant X4
circRNA_0159|Chr1:84542396_84642306_+	99911	91532	sense-overlapping	XM_017590023.1	Chr1:84576110_84656464_+	LOC100910046	GeneID:100910046,Genbank:XM_017590023.1,RGD:6500398	zinc finger protein 60-like, transcript variant X4
circRNA_0160|Chr1:84640085_84679646_+	39562	38065	sense-overlapping	XM_006228592.3	Chr1:84676591_84700075_+	Zfp780b	GeneID:499110,Genbank:XM_006228592.3,RGD:1592570	zinc finger protein 780B
circRNA_0161|Chr1:86877736_86888952_+	11217	11217	sense-overlapping	NM_001110491.1	Chr1:86872808_86878709_+	Fbxo27	GeneID:499114,Genbank:NM_001110491.1,RGD:1563982	F-box protein 27	GO:0004842,GO:0019005	ubiquitin-protein transferase activity|SCF ubiquitin ligase complex
circRNA_0162|Chr1:86959822_86961809_+	1988	275	sense-overlapping	XM_006228672.3	Chr1:86948866_86971954_+	Sirt2	GeneID:361532,Genbank:XM_006228672.3,RGD:621481	sirtuin 2, transcript variant X1	GO:0090042,GO:0097386,GO:0097456,GO:1900119,GO:2000777,GO:1900195,GO:0043130,GO:0043161,GO:0005634,GO:0043204,GO:0005694,GO:0043491,GO:0043209,GO:0005720,GO:0044224,GO:0005730,GO:0044242,GO:0005819,GO:0005829,GO:0005737,GO:0045598,GO:0046970,GO:0045599,GO:0005874,GO:0048012,GO:0005886,GO:0008285,GO:0006351,GO:0048471,GO:0010507,GO:0006476,GO:0061428,GO:0048487,GO:0010801,GO:0048715,GO:0000122,GO:…	tubulin deacetylation|glial cell projection|terminal loop|positive regulation of execution phase of apoptosis|positive regulation of proteasomal ubiquitin-dependent protein catabolic process involved in cellular response to hypoxia|positive regulation of oocyte maturation|ubiquitin binding|proteasome-mediated ubiquitin-dependent protein catabolic process|nucleus|perikaryon|chromosome|protein kina…			rno-Sirt2_0001	http://159.226.67.237:8080/new/circ_detail.php?ID=rno-Sirt2_0001
circRNA_0163|Chr1:87010380_87010777_+	398	294	sense-overlapping	NM_022594.1	Chr1:87009798_87015996_+	Ech1	GeneID:64526,Genbank:NM_022594.1,RGD:69353	enoyl-CoA hydratase 1	GO:0005777,GO:0006635,GO:0016853,GO:0051750,GO:0005102,GO:0005739	peroxisome|fatty acid beta-oxidation|isomerase activity|delta3,5-delta2,4-dienoyl-CoA isomerase activity|signaling receptor binding|mitochondrion	rno04146	Peroxisome	rno-Ech1_0001	http://159.226.67.237:8080/new/circ_detail.php?ID=rno-Ech1_0001
circRNA_0164|Chr1:87096526_87098627_-	2102	247	sense-overlapping	NM_031675.2	Chr1:87078012_87147308_-	Actn4	GeneID:63836,Genbank:NM_031675.2,RGD:61816	actinin alpha 4	GO:0005622,GO:0005634,GO:0005737,GO:0005829,GO:0031490,GO:0005903,GO:0032991,GO:0005911,GO:0015031,GO:0035257,GO:0035357,GO:0042803,GO:0051272,GO:0042974,GO:0070830,GO:0042981,GO:1900025,GO:0043005,GO:1901224,GO:1902396,GO:1903506,GO:0000977,GO:0001666,GO:0001725,GO:0001882,GO:0003779,GO:0005509,GO:0005515,GO:0015629,GO:0016604,GO:0030018,GO:0030050,GO:0030335,GO:0030374,GO:0044325,GO:0044877,GO:…	intracellular|nucleus|cytoplasm|cytosol|chromatin DNA binding|brush border|protein-containing complex|cell-cell junction|protein transport|nuclear hormone receptor binding|peroxisome proliferator activated receptor signaling pathway|protein homodimerization activity|positive regulation of cellular component movement|retinoic acid receptor binding|bicellular tight junction assembly|regulation of a…	rno04510,rno04520,rno04530,rno04810,rno04670,rno05203,rno05322,rno05146	Focal adhesion|Adherens junction|Tight junction|Regulation of actin cytoskeleton|Leukocyte transendothelial migration|Viral carcinogenesis|Systemic lupus erythematosus|Amoebiasis	rno-Actn4_0002	http://159.226.67.237:8080/new/circ_detail.php?ID=rno-Actn4_0002
circRNA_0165|Chr1:87947015_87947368_+	354	148	sense-overlapping	XM_006228716.3	Chr1:87937126_87959514_+	Map4k1	GeneID:292763,Genbank:XM_006228716.3,RGD:1305463	mitogen activated protein kinase kinase kinase kinase 1, transcript variant X1	GO:0018105,GO:0004674,GO:0023014,GO:0031098,GO:0005524,GO:0005575,GO:0005737,GO:0006468,GO:0007257,GO:0032147,GO:0035556,GO:0007346,GO:0042981,GO:0008150,GO:0046777,GO:0008283,GO:0000165,GO:1904628,GO:0008349,GO:0000185,GO:0003674	peptidyl-serine phosphorylation|protein serine/threonine kinase activity|signal transduction by protein phosphorylation|stress-activated protein kinase signaling cascade|ATP binding|cellular_component|cytoplasm|protein phosphorylation|activation of JUN kinase activity|activation of protein kinase activity|intracellular signal transduction|regulation of mitotic cell cycle|regulation of apoptotic p…	rno04010	MAPK signaling pathway	rno-Map4k1_0001	http://159.226.67.237:8080/new/circ_detail.php?ID=rno-Map4k1_0001
circRNA_0166|Chr1:87998985_87999475_-	491	300	sense-overlapping	XM_017590442.1	Chr1:87959596_88066252_-	Ryr1	GeneID:114207,Genbank:XM_017590442.1,RGD:1586637	ryanodine receptor 1, transcript variant X1	GO:0005219,GO:0005245,GO:0005262,GO:0005938,GO:0005509,GO:0006816,GO:0006936,GO:0030314,GO:0014802,GO:0030315,GO:0014808,GO:0030659,GO:0031000,GO:0031234,GO:0031301,GO:0001666,GO:0043931,GO:0031674,GO:0002020,GO:0032991,GO:0048741,GO:0003151,GO:0048763,GO:0071318,GO:1990425,GO:0051209,GO:0005515,GO:0005516,GO:0005524,GO:0005623,GO:0005737,GO:0005790,GO:0005886,GO:0016020,GO:0016021,GO:0016529,GO:…	ryanodine-sensitive calcium-release channel activity|voltage-gated calcium channel activity|calcium channel activity|cell cortex|calcium ion binding|calcium ion transport|muscle contraction|junctional membrane complex|terminal cisterna|T-tubule|release of sequestered calcium ion into cytosol by sarcoplasmic reticulum|cytoplasmic vesicle membrane|response to caffeine|extrinsic component of cytopla…	rno04371,rno04020,rno04921,rno04730,rno04713	Apelin signaling pathway|Calcium signaling pathway|Oxytocin signaling pathway|Long-term depression|Circadian entrainment	rno-Ryr1_0001	http://159.226.67.237:8080/new/circ_detail.php?ID=rno-Ryr1_0001
circRNA_0167|Chr1:88145614_88147210_-	1597	349	sense-overlapping	XM_008759124.2	Chr1:88131282_88162608_-	Catsperg1	GeneID:292767,Genbank:XM_008759124.2,RGD:1310942	catsper channel auxiliary subunit gamma 1, transcript variant X1	GO:0036128,GO:0097228	CatSper complex|sperm principal piece			rno-Catsperg_0003	http://159.226.67.237:8080/new/circ_detail.php?ID=rno-Catsperg_0003
circRNA_0168|Chr1:88586283_88592011_+	5729	1647	sense-overlapping	NM_144749.1	Chr1:88582641_88603219_+	Zfp382	GeneID:246264,Genbank:NM_144749.1,RGD:708385	zinc finger protein 382	GO:0001558,GO:0003676,GO:0003700,GO:0005622,GO:0005634,GO:0005654,GO:0006351,GO:0006355,GO:0043565,GO:0044212,GO:0045892,GO:0000122,GO:0045944,GO:0046872,GO:0001227	regulation of cell growth|nucleic acid binding|DNA binding transcription factor activity|intracellular|nucleus|nucleoplasm|transcription, DNA-templated|regulation of transcription, DNA-templated|sequence-specific DNA binding|transcription regulatory region DNA binding|negative regulation of transcription, DNA-templated|negative regulation of transcription by RNA polymerase II|positive regulation …			rno-Zfp382_0004	http://159.226.67.237:8080/new/circ_detail.php?ID=rno-Zfp382_0004
circRNA_0169|Chr1:88586311_88592011_+	5701	1619	sense-overlapping	NM_144749.1	Chr1:88582641_88603219_+	Zfp382	GeneID:246264,Genbank:NM_144749.1,RGD:708385	zinc finger protein 382	GO:0001558,GO:0003676,GO:0003700,GO:0005622,GO:0005634,GO:0005654,GO:0006351,GO:0006355,GO:0043565,GO:0044212,GO:0045892,GO:0000122,GO:0045944,GO:0046872,GO:0001227	regulation of cell growth|nucleic acid binding|DNA binding transcription factor activity|intracellular|nucleus|nucleoplasm|transcription, DNA-templated|regulation of transcription, DNA-templated|sequence-specific DNA binding|transcription regulatory region DNA binding|negative regulation of transcription, DNA-templated|negative regulation of transcription by RNA polymerase II|positive regulation …			rno-Zfp382_0002	http://159.226.67.237:8080/new/circ_detail.php?ID=rno-Zfp382_0002
circRNA_0170|Chr1:89001745_89004978_-	3234	491	sense-overlapping	NM_001127579.1	Chr1:88994552_89007041_-	Proser3	GeneID:361541,Genbank:NM_001127579.1,RGD:1565712	proline and serine rich 3					rno-Proser3_0003	http://159.226.67.237:8080/new/circ_detail.php?ID=rno-Proser3_0003
circRNA_0171|Chr1:89004403_89005893_-	1491	1174	sense-overlapping	NM_001127579.1	Chr1:88994552_89007041_-	Proser3	GeneID:361541,Genbank:NM_001127579.1,RGD:1565712	proline and serine rich 3					rno-Proser3_0001	http://159.226.67.237:8080/new/circ_detail.php?ID=rno-Proser3_0001
circRNA_0172|Chr1:89060770_89060964_+	195	195	antisense	NM_001108911.1	Chr1:89060581_89068348_-	Upk1a	GeneID:365227,Genbank:NM_001108911.1,RGD:1309849	uroplakin 1A	GO:0016021,GO:0016324,GO:0030855,GO:0120001,GO:0009986	integral component of membrane|apical plasma membrane|epithelial cell differentiation|apical plasma membrane urothelial plaque|cell surface
circRNA_0173|Chr1:89063951_89069613_+	5663	3166	antisense	XM_008759176.2	Chr1:89060582_89071579_-	Upk1a	GeneID:365227,Genbank:XM_008759176.2,RGD:1309849	uroplakin 1A, transcript variant X2	GO:0016021,GO:0016324,GO:0030855,GO:0120001,GO:0009986	integral component of membrane|apical plasma membrane|epithelial cell differentiation|apical plasma membrane urothelial plaque|cell surface
circRNA_0174|Chr1:89066078_89066445_-	368	368	intronic	NM_001108911.1	Chr1:89060581_89068348_-	Upk1a	GeneID:365227,Genbank:NM_001108911.1,RGD:1309849	uroplakin 1A	GO:0016021,GO:0016324,GO:0030855,GO:0120001,GO:0009986	integral component of membrane|apical plasma membrane|epithelial cell differentiation|apical plasma membrane urothelial plaque|cell surface
circRNA_0175|Chr1:89869828_89871257_-	1430	1430	intergenic										rno-AABR07002938_0001	http://159.226.67.237:8080/new/circ_detail.php?ID=rno-AABR07002938_0001
circRNA_0176|Chr1:90118871_90150334_-	31464	1588	sense-overlapping	XM_006228852.3	Chr1:90097333_90176119_-	RGD1308428	GeneID:308509,Genbank:XM_006228852.3,RGD:1308428	similar to RIKEN cDNA 4931406P16, transcript variant X9					rno-RGD1308428_0009	http://159.226.67.237:8080/new/circ_detail.php?ID=rno-RGD1308428_0009
circRNA_0177|Chr1:90151106_90151515_+	410	410	antisense	XM_006228848.3	Chr1:90097333_90151545_-	RGD1308428	GeneID:308509,Genbank:XM_006228848.3,RGD:1308428	similar to RIKEN cDNA 4931406P16, transcript variant X2
circRNA_0178|Chr1:91553353_91558124_-	4772	582	sense-overlapping	NM_001106246.1	Chr1:91529096_91578022_-	Gpatch1	GeneID:292810,Genbank:NM_001106246.1,RGD:1308935	G patch domain containing 1	GO:0006397,GO:0071013,GO:0003676,GO:0003723,GO:0005634	mRNA processing|catalytic step 2 spliceosome|nucleic acid binding|RNA binding|nucleus			rno-Gpatch1_0003	http://159.226.67.237:8080/new/circ_detail.php?ID=rno-Gpatch1_0003
circRNA_0179|Chr1:91560398_91562180_-	1783	391	sense-overlapping	NM_001106246.1	Chr1:91529096_91578022_-	Gpatch1	GeneID:292810,Genbank:NM_001106246.1,RGD:1308935	G patch domain containing 1	GO:0006397,GO:0071013,GO:0003676,GO:0003723,GO:0005634	mRNA processing|catalytic step 2 spliceosome|nucleic acid binding|RNA binding|nucleus			rno-Gpatch1_0008	http://159.226.67.237:8080/new/circ_detail.php?ID=rno-Gpatch1_0008	RNO_CIRCpedia_9417	NM_001106246	Gpatch1
circRNA_0180|Chr1:91671407_91673515_+	2109	340	sense-overlapping	XM_006228883.3	Chr1:91663723_91699362_+	Cep89	GeneID:292811,Genbank:XM_006228883.3,RGD:1311730	centrosomal protein 89, transcript variant X5	GO:0005829,GO:0005886,GO:0007005,GO:0007268,GO:0031514,GO:0060271,GO:0097539,GO:0097730,GO:1905515,GO:0000922,GO:0005813,GO:0005814	cytosol|plasma membrane|mitochondrion organization|chemical synaptic transmission|motile cilium|cilium assembly|ciliary transition fiber|non-motile cilium|non-motile cilium assembly|spindle pole|centrosome|centriole			rno-Cep89_0003	http://159.226.67.237:8080/new/circ_detail.php?ID=rno-Cep89_0003	RNO_CIRCpedia_1672	ENSRNOT00000089587.1	Cep89
circRNA_0181|Chr1:91873487_91879026_+	5540	746	sense-overlapping	XM_017589356.1	Chr1:91857048_91905128_+	Ankrd27	GeneID:361555,Genbank:XM_017589356.1,RGD:1307106	ankyrin repeat domain 27, transcript variant X2	GO:0048812,GO:0030133,GO:0005085,GO:0035544,GO:0005764,GO:0050775,GO:0035646,GO:0005769,GO:0097422,GO:0005770,GO:0005829,GO:0042470,GO:0005886,GO:0043005,GO:1990126,GO:0010976,GO:0043547,GO:0017137,GO:0000149,GO:0045022	neuron projection morphogenesis|transport vesicle|guanyl-nucleotide exchange factor activity|negative regulation of SNARE complex assembly|lysosome|positive regulation of dendrite morphogenesis|endosome to melanosome transport|early endosome|tubular endosome|late endosome|cytosol|melanosome|plasma membrane|neuron projection|retrograde transport, endosome to plasma membrane|positive regulation of …			rno-Ankrd27_0001	http://159.226.67.237:8080/new/circ_detail.php?ID=rno-Ankrd27_0001	RNO_CIRCpedia_1673	ENSRNOT00000077993.1	Ankrd27
circRNA_0182|Chr1:91883192_91887419_+	4228	513	sense-overlapping	XM_017589356.1	Chr1:91857048_91905128_+	Ankrd27	GeneID:361555,Genbank:XM_017589356.1,RGD:1307106	ankyrin repeat domain 27, transcript variant X2	GO:0048812,GO:0030133,GO:0005085,GO:0035544,GO:0005764,GO:0050775,GO:0035646,GO:0005769,GO:0097422,GO:0005770,GO:0005829,GO:0042470,GO:0005886,GO:0043005,GO:1990126,GO:0010976,GO:0043547,GO:0017137,GO:0000149,GO:0045022	neuron projection morphogenesis|transport vesicle|guanyl-nucleotide exchange factor activity|negative regulation of SNARE complex assembly|lysosome|positive regulation of dendrite morphogenesis|endosome to melanosome transport|early endosome|tubular endosome|late endosome|cytosol|melanosome|plasma membrane|neuron projection|retrograde transport, endosome to plasma membrane|positive regulation of …			rno-Ankrd27_0002	http://159.226.67.237:8080/new/circ_detail.php?ID=rno-Ankrd27_0002	RNO_CIRCpedia_9419	ENSRNOT00000077993.1	Ankrd27
circRNA_0183|Chr1:91889856_91900326_+	10471	864	sense-overlapping	XM_017589356.1	Chr1:91857048_91905128_+	Ankrd27	GeneID:361555,Genbank:XM_017589356.1,RGD:1307106	ankyrin repeat domain 27, transcript variant X2	GO:0048812,GO:0030133,GO:0005085,GO:0035544,GO:0005764,GO:0050775,GO:0035646,GO:0005769,GO:0097422,GO:0005770,GO:0005829,GO:0042470,GO:0005886,GO:0043005,GO:1990126,GO:0010976,GO:0043547,GO:0017137,GO:0000149,GO:0045022	neuron projection morphogenesis|transport vesicle|guanyl-nucleotide exchange factor activity|negative regulation of SNARE complex assembly|lysosome|positive regulation of dendrite morphogenesis|endosome to melanosome transport|early endosome|tubular endosome|late endosome|cytosol|melanosome|plasma membrane|neuron projection|retrograde transport, endosome to plasma membrane|positive regulation of …
circRNA_0184|Chr1:92039556_92043956_-	4401	359	sense-overlapping	NM_001135835.2	Chr1:92002927_92069160_-	Dpy19l3	GeneID:308519,Genbank:NM_001135835.2,RGD:1308334	dpy-19-like 3 (C. elegans)	GO:0018406,GO:0000030,GO:0005637,GO:0016021	protein C-linked glycosylation via 2'-alpha-mannosyl-L-tryptophan|mannosyltransferase activity|nuclear inner membrane|integral component of membrane			rno-Dpy19l3_0003	http://159.226.67.237:8080/new/circ_detail.php?ID=rno-Dpy19l3_0003	RNO_CIRCpedia_1676	NM_001135835	Dpy19l3
circRNA_0185|Chr1:93851663_93853240_-	1578	1578	exonic	XM_008759274.2	Chr1:93689114_94094518_-	Zfp536	GeneID:292820,Genbank:XM_008759274.2,RGD:1563363	zinc finger protein 536, transcript variant X10	GO:0001078,GO:0003700,GO:0005634,GO:0006355,GO:0006366,GO:0007165,GO:0007275,GO:0043565,GO:0044212,GO:0044323,GO:0000122,GO:0045665,GO:0048387,GO:0000978	transcriptional repressor activity, RNA polymerase II proximal promoter sequence-specific DNA binding|DNA binding transcription factor activity|nucleus|regulation of transcription, DNA-templated|transcription by RNA polymerase II|signal transduction|multicellular organism development|sequence-specific DNA binding|transcription regulatory region DNA binding|retinoic acid-responsive element binding…			rno-Zfp536_0001	http://159.226.67.237:8080/new/circ_detail.php?ID=rno-Zfp536_0001
circRNA_0186|Chr1:94027353_94093275_-	65923	261	sense-overlapping	XM_017590071.1	Chr1:93689114_94151710_-	Zfp536	GeneID:292820,Genbank:XM_017590071.1,RGD:1563363	zinc finger protein 536, transcript variant X6	GO:0001078,GO:0003700,GO:0005634,GO:0006355,GO:0006366,GO:0007165,GO:0007275,GO:0043565,GO:0044212,GO:0044323,GO:0000122,GO:0045665,GO:0048387,GO:0000978	transcriptional repressor activity, RNA polymerase II proximal promoter sequence-specific DNA binding|DNA binding transcription factor activity|nucleus|regulation of transcription, DNA-templated|transcription by RNA polymerase II|signal transduction|multicellular organism development|sequence-specific DNA binding|transcription regulatory region DNA binding|retinoic acid-responsive element binding…			rno-AABR07003030_0002	http://159.226.67.237:8080/new/circ_detail.php?ID=rno-AABR07003030_0002
circRNA_0187|Chr1:94356152_94368553_-	12402	365	sense-overlapping	XM_017589128.1	Chr1:94346513_94404362_-	Uri1	GeneID:308537,Genbank:XM_017589128.1,RGD:1310358	URI1, prefoldin-like chaperone, transcript variant X1	GO:0010923,GO:0001106,GO:0001558,GO:0019212,GO:0003682,GO:0005634,GO:0005654,GO:0005665,GO:0051219,GO:0071363,GO:0005737,GO:0071383,GO:0005829,GO:2001243,GO:0000122,GO:0006357,GO:0009615	negative regulation of phosphatase activity|RNA polymerase II transcription corepressor activity|regulation of cell growth|phosphatase inhibitor activity|chromatin binding|nucleus|nucleoplasm|DNA-directed RNA polymerase II, core complex|phosphoprotein binding|cellular response to growth factor stimulus|cytoplasm|cellular response to steroid hormone stimulus|cytosol|negative regulation of intrinsi…			rno-Uri1_0003	http://159.226.67.237:8080/new/circ_detail.php?ID=rno-Uri1_0003
circRNA_0188|Chr1:94367453_94368553_-	1101	215	sense-overlapping	XM_017589128.1	Chr1:94346513_94404362_-	Uri1	GeneID:308537,Genbank:XM_017589128.1,RGD:1310358	URI1, prefoldin-like chaperone, transcript variant X1	GO:0010923,GO:0001106,GO:0001558,GO:0019212,GO:0003682,GO:0005634,GO:0005654,GO:0005665,GO:0051219,GO:0071363,GO:0005737,GO:0071383,GO:0005829,GO:2001243,GO:0000122,GO:0006357,GO:0009615	negative regulation of phosphatase activity|RNA polymerase II transcription corepressor activity|regulation of cell growth|phosphatase inhibitor activity|chromatin binding|nucleus|nucleoplasm|DNA-directed RNA polymerase II, core complex|phosphoprotein binding|cellular response to growth factor stimulus|cytoplasm|cellular response to steroid hormone stimulus|cytosol|negative regulation of intrinsi…			rno-Uri1_0005	http://159.226.67.237:8080/new/circ_detail.php?ID=rno-Uri1_0005	RNO_CIRCpedia_9421	NM_001107507	Uri1
circRNA_0189|Chr1:94367453_94381994_-	14542	250	sense-overlapping	NM_001107507.1	Chr1:94346514_94404211_-	Uri1	GeneID:308537,Genbank:NM_001107507.1,RGD:1310358	URI1, prefoldin-like chaperone	GO:0010923,GO:0001106,GO:0001558,GO:0019212,GO:0003682,GO:0005634,GO:0005654,GO:0005665,GO:0051219,GO:0071363,GO:0005737,GO:0071383,GO:0005829,GO:2001243,GO:0000122,GO:0006357,GO:0009615	negative regulation of phosphatase activity|RNA polymerase II transcription corepressor activity|regulation of cell growth|phosphatase inhibitor activity|chromatin binding|nucleus|nucleoplasm|DNA-directed RNA polymerase II, core complex|phosphoprotein binding|cellular response to growth factor stimulus|cytoplasm|cellular response to steroid hormone stimulus|cytosol|negative regulation of intrinsi…			rno-Uri1_0001	http://159.226.67.237:8080/new/circ_detail.php?ID=rno-Uri1_0001
circRNA_0190|Chr1:99510577_99533851_+	23275	12984	sense-overlapping	XM_006229045.3	Chr1:99521177_99539232_+	Zfp819	GeneID:308561,Genbank:XM_006229045.3,RGD:1309564	zinc finger protein 819, transcript variant X3	GO:0005634,GO:0043065,GO:0043565,GO:0045892,GO:0046872,GO:0003676,GO:0003700	nucleus|positive regulation of apoptotic process|sequence-specific DNA binding|negative regulation of transcription, DNA-templated|metal ion binding|nucleic acid binding|DNA binding transcription factor activity
circRNA_0191|Chr1:99532444_99539093_+	6650	2115	sense-overlapping	XM_006229045.3	Chr1:99521177_99539232_+	Zfp819	GeneID:308561,Genbank:XM_006229045.3,RGD:1309564	zinc finger protein 819, transcript variant X3	GO:0005634,GO:0043065,GO:0043565,GO:0045892,GO:0046872,GO:0003676,GO:0003700	nucleus|positive regulation of apoptotic process|sequence-specific DNA binding|negative regulation of transcription, DNA-templated|metal ion binding|nucleic acid binding|DNA binding transcription factor activity			rno-Zfp819_0001	http://159.226.67.237:8080/new/circ_detail.php?ID=rno-Zfp819_0001
circRNA_0192|Chr1:100516688_100517438_-	751	277	sense-overlapping	NM_001106257.1	Chr1:100506704_100530183_-	Mybpc2	GeneID:292879,Genbank:NM_001106257.1,RGD:1311596	myosin binding protein C, fast-type	GO:0006941,GO:0007015,GO:0008307,GO:0030018,GO:0031430,GO:0045214,GO:0051015,GO:0051371,GO:0071688,GO:0097493,GO:0005859,GO:0005865,GO:0006936	striated muscle contraction|actin filament organization|structural constituent of muscle|Z disc|M band|sarcomere organization|actin filament binding|muscle alpha-actinin binding|striated muscle myosin thick filament assembly|structural molecule activity conferring elasticity|muscle myosin complex|striated muscle thin filament|muscle contraction			rno-Mybpc2_0001	http://159.226.67.237:8080/new/circ_detail.php?ID=rno-Mybpc2_0001
circRNA_0193|Chr1:100913425_100914082_-	658	406	sense-overlapping	XM_006229064.3	Chr1:100896582_100926443_-	Ap2a1	GeneID:308578,Genbank:XM_006229064.3,RGD:1306254	adaptor-related protein complex 2, alpha 1 subunit, transcript variant X1	GO:0048260,GO:0008022,GO:0050750,GO:0008565,GO:0072583,GO:0010976,GO:0016323,GO:0016324,GO:0019901,GO:0030117,GO:1900126,GO:0030131,GO:0030136,GO:0032433,GO:0032991,GO:0005515,GO:0035615,GO:0005905,GO:0044877,GO:0006886	positive regulation of receptor-mediated endocytosis|protein C-terminus binding|low-density lipoprotein particle receptor binding|protein transporter activity|clathrin-dependent endocytosis|positive regulation of neuron projection development|basolateral plasma membrane|apical plasma membrane|protein kinase binding|membrane coat|negative regulation of hyaluronan biosynthetic process|clathrin adap…	rno04144,rno04961,rno04721,rno05016	Endocytosis|Endocrine and other factor-regulated calcium reabsorption|Synaptic vesicle cycle|Huntington's disease	rno-Ap2a1_0001	http://159.226.67.237:8080/new/circ_detail.php?ID=rno-Ap2a1_0001	RNO_CIRCpedia_8395	NM_001107511	Ap2a1
circRNA_0194|Chr1:100977936_100978286_-	351	351	exonic	XM_006229146.3	Chr1:100971132_100980384_-	Prmt1	GeneID:60421,Genbank:XM_006229146.3,RGD:62020	protein arginine methyltransferase 1, transcript variant X3	GO:0006479,GO:0008170,GO:0008276,GO:0008284,GO:0019919,GO:0008327,GO:0008469,GO:0030519,GO:0031175,GO:0032991,GO:0034709,GO:0044020,GO:0034969,GO:0045648,GO:0035241,GO:0045653,GO:0046985,GO:0001701,GO:0048273,GO:0005515,GO:0097421,GO:0005634,GO:1900745,GO:0005654,GO:0005829,GO:0006355,GO:0008757,GO:0016020,GO:0016274,GO:0016275,GO:0016571,GO:0035242,GO:0018216,GO:0019899,GO:0035247,GO:0042054,GO:…	protein methylation|N-methyltransferase activity|protein methyltransferase activity|positive regulation of cell proliferation|peptidyl-arginine methylation, to asymmetrical-dimethyl arginine|methyl-CpG binding|histone-arginine N-methyltransferase activity|snoRNP binding|neuron projection development|protein-containing complex|methylosome|histone methyltransferase activity (H4-R3 specific)|histone…	rno04068,rno04922	FoxO signaling pathway|Glucagon signaling pathway	rno-Prmt1_0002	http://159.226.67.237:8080/new/circ_detail.php?ID=rno-Prmt1_0002
circRNA_0195|Chr1:100994983_100995166_-	184	184	antisense	XM_006229021.1	Chr1:100992244_100997202_+	Irf3	GeneID:292892,Genbank:XM_006229021.1,RGD:1549774	interferon regulatory factor 3, transcript variant X1	GO:0045944,GO:0032728,GO:0001078,GO:0050689,GO:0042802,GO:0003674,GO:0050715,GO:0042803,GO:0005575,GO:0051607,GO:0005634,GO:0005737,GO:0005829,GO:0043123,GO:0006366,GO:0060340,GO:0043330,GO:0009617,GO:0071222,GO:0043565,GO:0019904,GO:0071359,GO:0044212,GO:0031663,GO:0000122,GO:0097300,GO:0045351,GO:0032496,GO:0000978,GO:0045358,GO:0032727,GO:0001077	positive regulation of transcription by RNA polymerase II|positive regulation of interferon-beta production|transcriptional repressor activity, RNA polymerase II proximal promoter sequence-specific DNA binding|negative regulation of defense response to virus by host|identical protein binding|molecular_function|positive regulation of cytokine secretion|protein homodimerization activity|cellular_co…	rno04620,rno04621,rno04622,rno04623,rno05203,rno05133,rno05162,rno05164,rno05161,rno05160,rno05168,rno05167,rno05169,rno05165	Toll-like receptor signaling pathway|NOD-like receptor signaling pathway|RIG-I-like receptor signaling pathway|Cytosolic DNA-sensing pathway|Viral carcinogenesis|Pertussis|Measles|Influenza A|Hepatitis B|Hepatitis C|Herpes simplex infection|Kaposi's sarcoma-associated herpesvirus infection|Epstein-Barr virus infection|Human papillomavirus infection
circRNA_0196|Chr1:101028250_101029473_-	1224	733	sense-overlapping	XM_008759481.2	Chr1:101022373_101046228_-	Prr12	GeneID:361569,Genbank:XM_008759481.2,RGD:1309896	proline rich 12, transcript variant X1					rno-Prr12_0001	http://159.226.67.237:8080/new/circ_detail.php?ID=rno-Prr12_0001	RNO_CIRCpedia_1677	ENSRNOT00000091711.1	Prr12
circRNA_0197|Chr1:101120457_101136933_+	16477	14601	antisense	XM_017589309.1	Chr1:101120325_101123399_-	Rpl13a	GeneID:317646,Genbank:XM_017589309.1,RGD:628697	ribosomal protein L13A, transcript variant X1	GO:0097452,GO:0022625,GO:0003735,GO:0032496,GO:0042592,GO:0005125,GO:1901194,GO:0005840,GO:0006412,GO:0048246,GO:0010469,GO:0060425,GO:0015934,GO:0071320,GO:0016021,GO:0071346,GO:0017148,GO:0003674,GO:0071480,GO:0003729,GO:0071493	GAIT complex|cytosolic large ribosomal subunit|structural constituent of ribosome|response to lipopolysaccharide|homeostatic process|cytokine activity|negative regulation of formation of translation preinitiation complex|ribosome|translation|macrophage chemotaxis|regulation of signaling receptor activity|lung morphogenesis|large ribosomal subunit|cellular response to cAMP|integral component of me…	rno03010	Ribosome
circRNA_0198|Chr1:101139122_101144853_-	5732	2054	sense-overlapping	XM_006229099.2	Chr1:101138237_101151034_-	Aldh16a1	GeneID:361571,Genbank:XM_006229099.2,RGD:1566295	aldehyde dehydrogenase 16 family, member A1, transcript variant X1	GO:0004029,GO:0016491,GO:0055114	aldehyde dehydrogenase (NAD) activity|oxidoreductase activity|oxidation-reduction process			rno-Aldh16a1_0002	http://159.226.67.237:8080/new/circ_detail.php?ID=rno-Aldh16a1_0002
circRNA_0199|Chr1:101490358_101491796_-	1439	241	sense-overlapping	XM_006229164.3	Chr1:101480160_101500731_-	Nucb1	GeneID:84595,Genbank:XM_006229164.3,RGD:620030	nucleobindin 1, transcript variant X4	GO:0072718,GO:0005515,GO:0090498,GO:0005576,GO:0098547,GO:0005615,GO:0005634,GO:0005737,GO:0005769,GO:0005791,GO:1903533,GO:0005793,GO:0005794,GO:0005798,GO:0005801,GO:0001965,GO:0005802,GO:0003677,GO:0032580,GO:0005509	response to cisplatin|protein binding|extrinsic component of Golgi membrane|extracellular region|lumenal side of Golgi membrane|extracellular space|nucleus|cytoplasm|early endosome|rough endoplasmic reticulum|regulation of protein targeting|endoplasmic reticulum-Golgi intermediate compartment|Golgi apparatus|Golgi-associated vesicle|cis-Golgi network|G-protein alpha-subunit binding|trans-Golgi ne…			rno-Nucb1_0002	http://159.226.67.237:8080/new/circ_detail.php?ID=rno-Nucb1_0002	RNO_CIRCpedia_1678	ENSRNOT00000028390.5	Nucb1
circRNA_0200|Chr1:102519276_102519677_-	402	402	intronic	XM_006229229.3	Chr1:102461327_102664977_-	Sergef	GeneID:365243,Genbank:XM_006229229.3,RGD:1563497	secretion regulating guanine nucleotide exchange factor, transcript variant X4	GO:0005737,GO:0005829,GO:0016235,GO:0043231,GO:0050709,GO:0005634,GO:0005654	cytoplasm|cytosol|aggresome|intracellular membrane-bounded organelle|negative regulation of protein secretion|nucleus|nucleoplasm
circRNA_0201|Chr1:102613968_102660697_-	46730	1032	sense-overlapping	XM_006229227.3	Chr1:102461327_102664978_-	Sergef	GeneID:365243,Genbank:XM_006229227.3,RGD:1563497	secretion regulating guanine nucleotide exchange factor, transcript variant X1	GO:0005737,GO:0005829,GO:0016235,GO:0043231,GO:0050709,GO:0005634,GO:0005654	cytoplasm|cytosol|aggresome|intracellular membrane-bounded organelle|negative regulation of protein secretion|nucleus|nucleoplasm			rno-Sergef_0003	http://159.226.67.237:8080/new/circ_detail.php?ID=rno-Sergef_0003	RNO_CIRCpedia_1682	ENSRNOT00000015352.6	Sergef
circRNA_0202|Chr1:102638885_102660697_-	21813	784	sense-overlapping	XM_344891.8	Chr1:102461327_102664977_-	Sergef	GeneID:365243,Genbank:XM_344891.8,RGD:1563497	secretion regulating guanine nucleotide exchange factor, transcript variant X3	GO:0005737,GO:0005829,GO:0016235,GO:0043231,GO:0050709,GO:0005634,GO:0005654	cytoplasm|cytosol|aggresome|intracellular membrane-bounded organelle|negative regulation of protein secretion|nucleus|nucleoplasm			rno-Sergef_0008	http://159.226.67.237:8080/new/circ_detail.php?ID=rno-Sergef_0008	RNO_CIRCpedia_1685	ENSRNOT00000015352.6	Sergef
circRNA_0203|Chr1:102658895_102660697_-	1803	292	sense-overlapping	XM_006229229.3	Chr1:102461327_102664977_-	Sergef	GeneID:365243,Genbank:XM_006229229.3,RGD:1563497	secretion regulating guanine nucleotide exchange factor, transcript variant X4	GO:0005737,GO:0005829,GO:0016235,GO:0043231,GO:0050709,GO:0005634,GO:0005654	cytoplasm|cytosol|aggresome|intracellular membrane-bounded organelle|negative regulation of protein secretion|nucleus|nucleoplasm			rno-Sergef_0011	http://159.226.67.237:8080/new/circ_detail.php?ID=rno-Sergef_0011	RNO_CIRCpedia_1690	ENSRNOT00000015352.6	Sergef
circRNA_0204|Chr1:102817129_102818162_-	1034	234	sense-overlapping	NM_001135612.1	Chr1:102810114_102849430_-	Hps5	GeneID:308598,Genbank:NM_001135612.1,RGD:1311916	Hermansky-Pudlak syndrome 5	GO:0043473,GO:0006996,GO:0007596,GO:0031084	pigmentation|organelle organization|blood coagulation|BLOC-2 complex			rno-Hps5_0006	http://159.226.67.237:8080/new/circ_detail.php?ID=rno-Hps5_0006
circRNA_0205|Chr1:104785950_104787042_+	1093	1093	exonic	XM_017588749.1	Chr1:104575765_104941554_+	Nav2	GeneID:171563,Genbank:XM_017588749.1,RGD:619778	neuron navigator 2, transcript variant X12	GO:0005654,GO:0007399,GO:0007605,GO:0007608,GO:0007626,GO:0008201,GO:0021554,GO:0021563,GO:0021564,GO:0003025,GO:0005578,GO:0005614	nucleoplasm|nervous system development|sensory perception of sound|sensory perception of smell|locomotory behavior|heparin binding|optic nerve development|glossopharyngeal nerve development|vagus nerve development|regulation of systemic arterial blood pressure by baroreceptor feedback|proteinaceous extracellular matrix|interstitial matrix			rno-Nav2_0012	http://159.226.67.237:8080/new/circ_detail.php?ID=rno-Nav2_0012	RNO_CIRCpedia_8397	NM_138529	Nav2
circRNA_0206|Chr1:104792188_104821976_+	29789	735	sense-overlapping	XM_017588749.1	Chr1:104575765_104941554_+	Nav2	GeneID:171563,Genbank:XM_017588749.1,RGD:619778	neuron navigator 2, transcript variant X12	GO:0005654,GO:0007399,GO:0007605,GO:0007608,GO:0007626,GO:0008201,GO:0021554,GO:0021563,GO:0021564,GO:0003025,GO:0005578,GO:0005614	nucleoplasm|nervous system development|sensory perception of sound|sensory perception of smell|locomotory behavior|heparin binding|optic nerve development|glossopharyngeal nerve development|vagus nerve development|regulation of systemic arterial blood pressure by baroreceptor feedback|proteinaceous extracellular matrix|interstitial matrix			rno-Nav2_0001	http://159.226.67.237:8080/new/circ_detail.php?ID=rno-Nav2_0001	RNO_CIRCpedia_1694	NM_138529	Nav2
circRNA_0207|Chr1:104793271_104795565_+	2295	499	sense-overlapping	XM_017588749.1	Chr1:104575765_104941554_+	Nav2	GeneID:171563,Genbank:XM_017588749.1,RGD:619778	neuron navigator 2, transcript variant X12	GO:0005654,GO:0007399,GO:0007605,GO:0007608,GO:0007626,GO:0008201,GO:0021554,GO:0021563,GO:0021564,GO:0003025,GO:0005578,GO:0005614	nucleoplasm|nervous system development|sensory perception of sound|sensory perception of smell|locomotory behavior|heparin binding|optic nerve development|glossopharyngeal nerve development|vagus nerve development|regulation of systemic arterial blood pressure by baroreceptor feedback|proteinaceous extracellular matrix|interstitial matrix			rno-Nav2_0015	http://159.226.67.237:8080/new/circ_detail.php?ID=rno-Nav2_0015	RNO_CIRCpedia_1695	NM_138529	Nav2
circRNA_0208|Chr1:105134109_105142233_+	8125	222	sense-overlapping	NM_053557.1	Chr1:105113595_105200253_+	Prmt3	GeneID:89820,Genbank:NM_053557.1,RGD:620413	protein arginine methyltransferase 3	GO:0060997,GO:0019919,GO:0005829,GO:0072341,GO:0031397,GO:0005840,GO:0006355,GO:0006479,GO:0008168,GO:0008469,GO:0034969,GO:0008757,GO:0016274,GO:0035242,GO:0005737,GO:0035246,GO:0018216,GO:0046872	dendritic spine morphogenesis|peptidyl-arginine methylation, to asymmetrical-dimethyl arginine|cytosol|modified amino acid binding|negative regulation of protein ubiquitination|ribosome|regulation of transcription, DNA-templated|protein methylation|methyltransferase activity|histone-arginine N-methyltransferase activity|histone arginine methylation|S-adenosylmethionine-dependent methyltransferase…			rno-Prmt3_0007	http://159.226.67.237:8080/new/circ_detail.php?ID=rno-Prmt3_0007	RNO_CIRCpedia_5085	NM_053557	Prmt3
circRNA_0209|Chr1:105587865_105611701_+	23837	412	sense-overlapping	XM_017589771.1	Chr1:105348577_106218970_+	Nell1	GeneID:81733,Genbank:XM_017589771.1,RGD:620998	neural EGFL like 1, transcript variant X1	GO:1903363,GO:0043065,GO:0005635,GO:0045667,GO:0045669,GO:0005737,GO:0008201,GO:0010468,GO:0030154,GO:0045778,GO:0030501,GO:0048471,GO:0033689,GO:0005080,GO:0070207,GO:0005509,GO:0042802,GO:0005615	negative regulation of cellular protein catabolic process|positive regulation of apoptotic process|nuclear envelope|regulation of osteoblast differentiation|positive regulation of osteoblast differentiation|cytoplasm|heparin binding|regulation of gene expression|cell differentiation|positive regulation of ossification|positive regulation of bone mineralization|perinuclear region of cytoplasm|nega…			rno-Nell1_0002	http://159.226.67.237:8080/new/circ_detail.php?ID=rno-Nell1_0002
circRNA_0210|Chr1:107253894_107272253_+	18360	556	sense-overlapping	XM_017589558.1	Chr1:107234389_107363624_+	Gas2	GeneID:499156,Genbank:XM_017589558.1,RGD:1563167	growth arrest-specific 2, transcript variant X1	GO:0005856,GO:0006915,GO:0008017	cytoskeleton|apoptotic process|microtubule binding			rno-Gas2_0009	http://159.226.67.237:8080/new/circ_detail.php?ID=rno-Gas2_0009
circRNA_0211|Chr1:114304821_114311513_+	6693	459	sense-overlapping	XM_006229288.2	Chr1:114258773_114347138_+	Cyfip1	GeneID:308666,Genbank:XM_006229288.2,RGD:1310332	cytoplasmic FMR1 interacting protein 1, transcript variant X1	GO:0030027,GO:0030031,GO:0030032,GO:0031175,GO:0031209,GO:0048365,GO:0032433,GO:0048471,GO:0032869,GO:0048675,GO:0043005,GO:0050772,GO:0050890,GO:0051388,GO:0051602,GO:0060076,GO:0090724,GO:0090725,GO:0000340,GO:0000902,GO:0005737,GO:0005845,GO:0006417,GO:0007411,GO:0016601,GO:0043025,GO:0043195,GO:0043197,GO:0044294,GO:0044295,GO:0044877,GO:0097484,GO:0099563,GO:0045202,GO:0045773,GO:1900006,GO:…	lamellipodium|cell projection assembly|lamellipodium assembly|neuron projection development|SCAR complex|Rac GTPase binding|filopodium tip|perinuclear region of cytoplasm|cellular response to insulin stimulus|axon extension|neuron projection|positive regulation of axonogenesis|cognition|positive regulation of neurotrophin TRK receptor signaling pathway|response to electrical stimulus|excitatory s…	rno03013,rno04810	RNA transport|Regulation of actin cytoskeleton	rno-Cyfip1_0001	http://159.226.67.237:8080/new/circ_detail.php?ID=rno-Cyfip1_0001	RNO_CIRCpedia_1700	ENSRNOT00000088459.1	Cyfip1
circRNA_0212|Chr1:114562502_114599418_+	36917	19735	sense-overlapping	XM_006229300.3	Chr1:114453033_114653787_+	Herc2	GeneID:308669,Genbank:XM_006229300.3,RGD:1307989	HECT and RLD domain containing E3 ubiquitin protein ligase 2, transcript variant X1	GO:0005737,GO:0006974,GO:0007283,GO:0008270,GO:0016567,GO:0031625,GO:0032183,GO:0043161,GO:0004842,GO:0061630,GO:0005634	cytoplasm|cellular response to DNA damage stimulus|spermatogenesis|zinc ion binding|protein ubiquitination|ubiquitin protein ligase binding|SUMO binding|proteasome-mediated ubiquitin-dependent protein catabolic process|ubiquitin-protein transferase activity|ubiquitin protein ligase activity|nucleus	rno04120	Ubiquitin mediated proteolysis	rno-Herc2_0002	http://159.226.67.237:8080/new/circ_detail.php?ID=rno-Herc2_0002
circRNA_0213|Chr1:114562507_114599418_+	36912	19730	sense-overlapping	XM_006229300.3	Chr1:114453033_114653787_+	Herc2	GeneID:308669,Genbank:XM_006229300.3,RGD:1307989	HECT and RLD domain containing E3 ubiquitin protein ligase 2, transcript variant X1	GO:0005737,GO:0006974,GO:0007283,GO:0008270,GO:0016567,GO:0031625,GO:0032183,GO:0043161,GO:0004842,GO:0061630,GO:0005634	cytoplasm|cellular response to DNA damage stimulus|spermatogenesis|zinc ion binding|protein ubiquitination|ubiquitin protein ligase binding|SUMO binding|proteasome-mediated ubiquitin-dependent protein catabolic process|ubiquitin-protein transferase activity|ubiquitin protein ligase activity|nucleus	rno04120	Ubiquitin mediated proteolysis
circRNA_0214|Chr1:114597220_114599418_+	2199	500	sense-overlapping	XM_006229300.3	Chr1:114453033_114653787_+	Herc2	GeneID:308669,Genbank:XM_006229300.3,RGD:1307989	HECT and RLD domain containing E3 ubiquitin protein ligase 2, transcript variant X1	GO:0005737,GO:0006974,GO:0007283,GO:0008270,GO:0016567,GO:0031625,GO:0032183,GO:0043161,GO:0004842,GO:0061630,GO:0005634	cytoplasm|cellular response to DNA damage stimulus|spermatogenesis|zinc ion binding|protein ubiquitination|ubiquitin protein ligase binding|SUMO binding|proteasome-mediated ubiquitin-dependent protein catabolic process|ubiquitin-protein transferase activity|ubiquitin protein ligase activity|nucleus	rno04120	Ubiquitin mediated proteolysis	rno-Herc2_0015	http://159.226.67.237:8080/new/circ_detail.php?ID=rno-Herc2_0015	RNO_CIRCpedia_1704	ENSRNOT00000090796.1	Herc2
circRNA_0215|Chr1:116604549_116610544_+	5996	221	sense-overlapping	XM_008759400.2	Chr1:116586901_116675617_+	Ube3a	GeneID:361585,Genbank:XM_008759400.2,RGD:1306361	ubiquitin protein ligase E3A, transcript variant X5	GO:0060736,GO:0032570,GO:0003713,GO:0061002,GO:0035037,GO:0004842,GO:0061630,GO:0042220,GO:0005575,GO:0005634,GO:0005737,GO:0005829,GO:0006511,GO:0042542,GO:0008150,GO:0070936,GO:0042752,GO:0014068,GO:1990416,GO:0043161,GO:0016567,GO:2000058,GO:0045944,GO:0000209,GO:0050847,GO:0030521,GO:0001541,GO:0051865,GO:0031398,GO:0003674	prostate gland growth|response to progesterone|transcription coactivator activity|negative regulation of dendritic spine morphogenesis|sperm entry|ubiquitin-protein transferase activity|ubiquitin protein ligase activity|response to cocaine|cellular_component|nucleus|cytoplasm|cytosol|ubiquitin-dependent protein catabolic process|response to hydrogen peroxide|biological_process|protein K48-linked …	rno04120,rno05203,rno05165	Ubiquitin mediated proteolysis|Viral carcinogenesis|Human papillomavirus infection	rno-Ube3a_0005	http://159.226.67.237:8080/new/circ_detail.php?ID=rno-Ube3a_0005
circRNA_0216|Chr1:116643750_116660509_+	16760	2277	sense-overlapping	XM_006229310.3	Chr1:116586901_116675617_+	Ube3a	GeneID:361585,Genbank:XM_006229310.3,RGD:1306361	ubiquitin protein ligase E3A, transcript variant X3	GO:0060736,GO:0032570,GO:0003713,GO:0061002,GO:0035037,GO:0004842,GO:0061630,GO:0042220,GO:0005575,GO:0005634,GO:0005737,GO:0005829,GO:0006511,GO:0042542,GO:0008150,GO:0070936,GO:0042752,GO:0014068,GO:1990416,GO:0043161,GO:0016567,GO:2000058,GO:0045944,GO:0000209,GO:0050847,GO:0030521,GO:0001541,GO:0051865,GO:0031398,GO:0003674	prostate gland growth|response to progesterone|transcription coactivator activity|negative regulation of dendritic spine morphogenesis|sperm entry|ubiquitin-protein transferase activity|ubiquitin protein ligase activity|response to cocaine|cellular_component|nucleus|cytoplasm|cytosol|ubiquitin-dependent protein catabolic process|response to hydrogen peroxide|biological_process|protein K48-linked …	rno04120,rno05203,rno05165	Ubiquitin mediated proteolysis|Viral carcinogenesis|Human papillomavirus infection	rno-Ube3a_0002	http://159.226.67.237:8080/new/circ_detail.php?ID=rno-Ube3a_0002
circRNA_0217|Chr1:122605870_122678378_-	72509	72509	intergenic										rno-AABR07004022_0001	http://159.226.67.237:8080/new/circ_detail.php?ID=rno-AABR07004022_0001
circRNA_0218|Chr1:122613645_122680102_-	66458	66458	intergenic										rno-AABR07004022_0002	http://159.226.67.237:8080/new/circ_detail.php?ID=rno-AABR07004022_0002
circRNA_0219|Chr1:125135342_125151462_+	16121	625	sense-overlapping	NM_001100846.1	Chr1:125124743_125175857_+	Mtmr10	GeneID:309255,Genbank:NM_001100846.1,RGD:1305958	myotubularin related protein 10	GO:0005737	cytoplasm			rno-Mtmr10_0003	http://159.226.67.237:8080/new/circ_detail.php?ID=rno-Mtmr10_0003	RNO_CIRCpedia_5097	NM_001100846	Mtmr10
circRNA_0220|Chr1:126149975_126164946_-	14972	2161	sense-overlapping	NM_001106266.1	Chr1:126146489_126211439_-	Tjp1	GeneID:292994,Genbank:NM_001106266.1,RGD:1306305	tight junction protein 1	GO:0005911,GO:0005912,GO:0005913,GO:0005921,GO:0005923,GO:0032496,GO:0007605,GO:0032991,GO:0008022,GO:0009986,GO:0042493,GO:0043116,GO:0043296,GO:0045177,GO:0045296,GO:0045471,GO:0046581,GO:0001825,GO:0005515,GO:0005524,GO:0005634,GO:0005737,GO:0005829,GO:0005886,GO:0014704,GO:0016020,GO:0016301,GO:0016310,GO:0016323,GO:0016324,GO:0016327,GO:0070160,GO:0019904,GO:0070830,GO:0030054,GO:0071000,GO:…	cell-cell junction|adherens junction|cell-cell adherens junction|gap junction|bicellular tight junction|response to lipopolysaccharide|sensory perception of sound|protein-containing complex|protein C-terminus binding|cell surface|response to drug|negative regulation of vascular permeability|apical junction complex|apical part of cell|cadherin binding|response to ethanol|intercellular canaliculus|…	rno04520,rno04530,rno04540,rno05132	Adherens junction|Tight junction|Gap junction|Salmonella infection
circRNA_0221|Chr1:126149996_126164946_-	14951	2140	sense-overlapping	NM_001106266.1	Chr1:126146489_126211439_-	Tjp1	GeneID:292994,Genbank:NM_001106266.1,RGD:1306305	tight junction protein 1	GO:0005911,GO:0005912,GO:0005913,GO:0005921,GO:0005923,GO:0032496,GO:0007605,GO:0032991,GO:0008022,GO:0009986,GO:0042493,GO:0043116,GO:0043296,GO:0045177,GO:0045296,GO:0045471,GO:0046581,GO:0001825,GO:0005515,GO:0005524,GO:0005634,GO:0005737,GO:0005829,GO:0005886,GO:0014704,GO:0016020,GO:0016301,GO:0016310,GO:0016323,GO:0016324,GO:0016327,GO:0070160,GO:0019904,GO:0070830,GO:0030054,GO:0071000,GO:…	cell-cell junction|adherens junction|cell-cell adherens junction|gap junction|bicellular tight junction|response to lipopolysaccharide|sensory perception of sound|protein-containing complex|protein C-terminus binding|cell surface|response to drug|negative regulation of vascular permeability|apical junction complex|apical part of cell|cadherin binding|response to ethanol|intercellular canaliculus|…	rno04520,rno04530,rno04540,rno05132	Adherens junction|Tight junction|Gap junction|Salmonella infection
circRNA_0222|Chr1:126188351_126195625_-	7275	926	sense-overlapping	NM_001106266.1	Chr1:126146489_126211439_-	Tjp1	GeneID:292994,Genbank:NM_001106266.1,RGD:1306305	tight junction protein 1	GO:0005911,GO:0005912,GO:0005913,GO:0005921,GO:0005923,GO:0032496,GO:0007605,GO:0032991,GO:0008022,GO:0009986,GO:0042493,GO:0043116,GO:0043296,GO:0045177,GO:0045296,GO:0045471,GO:0046581,GO:0001825,GO:0005515,GO:0005524,GO:0005634,GO:0005737,GO:0005829,GO:0005886,GO:0014704,GO:0016020,GO:0016301,GO:0016310,GO:0016323,GO:0016324,GO:0016327,GO:0070160,GO:0019904,GO:0070830,GO:0030054,GO:0071000,GO:…	cell-cell junction|adherens junction|cell-cell adherens junction|gap junction|bicellular tight junction|response to lipopolysaccharide|sensory perception of sound|protein-containing complex|protein C-terminus binding|cell surface|response to drug|negative regulation of vascular permeability|apical junction complex|apical part of cell|cadherin binding|response to ethanol|intercellular canaliculus|…	rno04520,rno04530,rno04540,rno05132	Adherens junction|Tight junction|Gap junction|Salmonella infection	rno-Tjp1_0002	http://159.226.67.237:8080/new/circ_detail.php?ID=rno-Tjp1_0002	RNO_CIRCpedia_1706	NM_001106266	Tjp1
circRNA_0223|Chr1:126192619_126195625_-	3007	505	sense-overlapping	NM_001106266.1	Chr1:126146489_126211439_-	Tjp1	GeneID:292994,Genbank:NM_001106266.1,RGD:1306305	tight junction protein 1	GO:0005911,GO:0005912,GO:0005913,GO:0005921,GO:0005923,GO:0032496,GO:0007605,GO:0032991,GO:0008022,GO:0009986,GO:0042493,GO:0043116,GO:0043296,GO:0045177,GO:0045296,GO:0045471,GO:0046581,GO:0001825,GO:0005515,GO:0005524,GO:0005634,GO:0005737,GO:0005829,GO:0005886,GO:0014704,GO:0016020,GO:0016301,GO:0016310,GO:0016323,GO:0016324,GO:0016327,GO:0070160,GO:0019904,GO:0070830,GO:0030054,GO:0071000,GO:…	cell-cell junction|adherens junction|cell-cell adherens junction|gap junction|bicellular tight junction|response to lipopolysaccharide|sensory perception of sound|protein-containing complex|protein C-terminus binding|cell surface|response to drug|negative regulation of vascular permeability|apical junction complex|apical part of cell|cadherin binding|response to ethanol|intercellular canaliculus|…	rno04520,rno04530,rno04540,rno05132	Adherens junction|Tight junction|Gap junction|Salmonella infection	rno-Tjp1_0004	http://159.226.67.237:8080/new/circ_detail.php?ID=rno-Tjp1_0004	RNO_CIRCpedia_7557	NM_001106266	Tjp1
circRNA_0224|Chr1:126573474_126583015_+	9542	9542	sense-overlapping	NM_001106267.1	Chr1:126573474_126595778_+	Tm2d3	GeneID:292995,Genbank:NM_001106267.1,RGD:1564929	TM2 domain containing 3					rno-intergenic_000861	http://159.226.67.237:8080/new/circ_detail.php?ID=rno-intergenic_000861
circRNA_0225|Chr1:127025462_127025957_+	496	496	exonic	NM_001106268.1	Chr1:127010587_127071570_+	Chsy1	GeneID:292999,Genbank:NM_001106268.1,RGD:1311904	chondroitin sulfate synthase 1	GO:0005576,GO:0009954,GO:0016757,GO:0030206,GO:0030279,GO:0031667,GO:0032580,GO:0045880,GO:0047238,GO:0051216,GO:0051923,GO:0002063,GO:0060349,GO:0003674,GO:0005575	extracellular region|proximal/distal pattern formation|transferase activity, transferring glycosyl groups|chondroitin sulfate biosynthetic process|negative regulation of ossification|response to nutrient levels|Golgi cisterna membrane|positive regulation of smoothened signaling pathway|glucuronosyl-N-acetylgalactosaminyl-proteoglycan 4-beta-N-acetylgalactosaminyltransferase activity|cartilage dev…	rno00532	Glycosaminoglycan biosynthesis - chondroitin sulfate / dermatan sulfate	rno-Chsy1_0001	http://159.226.67.237:8080/new/circ_detail.php?ID=rno-Chsy1_0001	RNO_CIRCpedia_1708	ENSRNOT00000016939.6	Chsy1
circRNA_0226|Chr1:127238866_127255047_-	16182	665	sense-overlapping	XM_017589156.1	Chr1:127166866_127264631_-	Lrrk1	GeneID:308703,Genbank:XM_017589156.1,RGD:1308000	leucine-rich repeat kinase 1, transcript variant X2	GO:1902533,GO:0005737,GO:0005739,GO:0005829,GO:0006468,GO:0035556,GO:0036035,GO:0042802,GO:0045453,GO:0050731,GO:0004674,GO:0050732,GO:0004871,GO:0090263,GO:0005524	positive regulation of intracellular signal transduction|cytoplasm|mitochondrion|cytosol|protein phosphorylation|intracellular signal transduction|osteoclast development|identical protein binding|bone resorption|positive regulation of peptidyl-tyrosine phosphorylation|protein serine/threonine kinase activity|negative regulation of peptidyl-tyrosine phosphorylation|signal transducer activity|posit…			rno-Lrrk1_0002	http://159.226.67.237:8080/new/circ_detail.php?ID=rno-Lrrk1_0002
circRNA_0227|Chr1:127301950_127302108_+	159	159	intergenic										rno-Aldh1a3_0001	http://159.226.67.237:8080/new/circ_detail.php?ID=rno-Aldh1a3_0001
circRNA_0228|Chr1:127706620_127739030_+	32411	846	sense-overlapping	NM_001127561.1	Chr1:127706618_127781041_+	Cers3	GeneID:499174,Genbank:NM_001127561.1,RGD:1564356	ceramide synthase 3	GO:0006629,GO:0016021,GO:0016410,GO:0030148,GO:0030216,GO:0046513,GO:0050291,GO:0003677,GO:0005634,GO:0005783	lipid metabolic process|integral component of membrane|N-acyltransferase activity|sphingolipid biosynthetic process|keratinocyte differentiation|ceramide biosynthetic process|sphingosine N-acyltransferase activity|DNA binding|nucleus|endoplasmic reticulum	rno00600,rno04071	Sphingolipid metabolism|Sphingolipid signaling pathway
circRNA_0229|Chr1:127814440_127858479_+	44040	336	sense-overlapping	XM_006229360.3	Chr1:127802872_128126764_+	Adamts17	GeneID:293004,Genbank:XM_006229360.3,RGD:1308783	ADAM metallopeptidase with thrombospondin type 1 motif, 17, transcript variant X1	GO:0046872,GO:0003676,GO:0004222,GO:0006508	metal ion binding|nucleic acid binding|metalloendopeptidase activity|proteolysis			rno-Adamts17_0006	http://159.226.67.237:8080/new/circ_detail.php?ID=rno-Adamts17_0006
circRNA_0230|Chr1:127814440_127887913_+	73474	622	sense-overlapping	XM_006229360.3	Chr1:127802872_128126764_+	Adamts17	GeneID:293004,Genbank:XM_006229360.3,RGD:1308783	ADAM metallopeptidase with thrombospondin type 1 motif, 17, transcript variant X1	GO:0046872,GO:0003676,GO:0004222,GO:0006508	metal ion binding|nucleic acid binding|metalloendopeptidase activity|proteolysis			rno-Adamts17_0001	http://159.226.67.237:8080/new/circ_detail.php?ID=rno-Adamts17_0001	RNO_CIRCpedia_6525	ENSRNOT00000055877.3	Adamts17
circRNA_0231|Chr1:127881908_127887913_+	6006	286	sense-overlapping	XM_006229360.3	Chr1:127802872_128126764_+	Adamts17	GeneID:293004,Genbank:XM_006229360.3,RGD:1308783	ADAM metallopeptidase with thrombospondin type 1 motif, 17, transcript variant X1	GO:0046872,GO:0003676,GO:0004222,GO:0006508	metal ion binding|nucleic acid binding|metalloendopeptidase activity|proteolysis			rno-Adamts17_0005	http://159.226.67.237:8080/new/circ_detail.php?ID=rno-Adamts17_0005
circRNA_0232|Chr1:128239552_128242835_-	3284	418	sense-overlapping	XM_008759542.2	Chr1:128207715_128341678_-	Mef2a	GeneID:309957,Genbank:XM_008759542.2,RGD:1359360	myocyte enhancer factor 2a, transcript variant X3	GO:0000790,GO:0000976,GO:0000977,GO:0000978,GO:0001205,GO:0003677,GO:0003682,GO:0000981,GO:0003700,GO:0003705,GO:0005829,GO:0006351,GO:0005515,GO:0005634,GO:0006355,GO:0006366,GO:0006915,GO:0007275,GO:0000002,GO:0042826,GO:0007507,GO:0000122,GO:0008134,GO:0043565,GO:0000165,GO:0046983,GO:0044212,GO:0048311,GO:0045893,GO:0048813,GO:0055005,GO:0061337,GO:0070375,GO:0071277,GO:0071333,GO:0000982,GO:…	nuclear chromatin|transcription regulatory region sequence-specific DNA binding|RNA polymerase II regulatory region sequence-specific DNA binding|RNA polymerase II proximal promoter sequence-specific DNA binding|transcriptional activator activity, RNA polymerase II distal enhancer sequence-specific DNA binding|DNA binding|chromatin binding|RNA polymerase II transcription factor activity, sequence…	rno04371,rno04022,rno05418	Apelin signaling pathway|cGMP - PKG signaling pathway|Fluid shear stress and atherosclerosis	rno-Mef2a_0002	http://159.226.67.237:8080/new/circ_detail.php?ID=rno-Mef2a_0002
circRNA_0233|Chr1:128239552_128243030_-	3479	613	sense-overlapping	XM_008759542.2	Chr1:128207715_128341678_-	Mef2a	GeneID:309957,Genbank:XM_008759542.2,RGD:1359360	myocyte enhancer factor 2a, transcript variant X3	GO:0000790,GO:0000976,GO:0000977,GO:0000978,GO:0001205,GO:0003677,GO:0003682,GO:0000981,GO:0003700,GO:0003705,GO:0005829,GO:0006351,GO:0005515,GO:0005634,GO:0006355,GO:0006366,GO:0006915,GO:0007275,GO:0000002,GO:0042826,GO:0007507,GO:0000122,GO:0008134,GO:0043565,GO:0000165,GO:0046983,GO:0044212,GO:0048311,GO:0045893,GO:0048813,GO:0055005,GO:0061337,GO:0070375,GO:0071277,GO:0071333,GO:0000982,GO:…	nuclear chromatin|transcription regulatory region sequence-specific DNA binding|RNA polymerase II regulatory region sequence-specific DNA binding|RNA polymerase II proximal promoter sequence-specific DNA binding|transcriptional activator activity, RNA polymerase II distal enhancer sequence-specific DNA binding|DNA binding|chromatin binding|RNA polymerase II transcription factor activity, sequence…	rno04371,rno04022,rno05418	Apelin signaling pathway|cGMP - PKG signaling pathway|Fluid shear stress and atherosclerosis	rno-Mef2a_0001	http://159.226.67.237:8080/new/circ_detail.php?ID=rno-Mef2a_0001	RNO_CIRCpedia_1711	ENSRNOT00000070864.3	Mef2a
circRNA_0234|Chr1:128267052_128287291_-	20240	476	sense-overlapping	XM_008759542.2	Chr1:128207715_128341678_-	Mef2a	GeneID:309957,Genbank:XM_008759542.2,RGD:1359360	myocyte enhancer factor 2a, transcript variant X3	GO:0000790,GO:0000976,GO:0000977,GO:0000978,GO:0001205,GO:0003677,GO:0003682,GO:0000981,GO:0003700,GO:0003705,GO:0005829,GO:0006351,GO:0005515,GO:0005634,GO:0006355,GO:0006366,GO:0006915,GO:0007275,GO:0000002,GO:0042826,GO:0007507,GO:0000122,GO:0008134,GO:0043565,GO:0000165,GO:0046983,GO:0044212,GO:0048311,GO:0045893,GO:0048813,GO:0055005,GO:0061337,GO:0070375,GO:0071277,GO:0071333,GO:0000982,GO:…	nuclear chromatin|transcription regulatory region sequence-specific DNA binding|RNA polymerase II regulatory region sequence-specific DNA binding|RNA polymerase II proximal promoter sequence-specific DNA binding|transcriptional activator activity, RNA polymerase II distal enhancer sequence-specific DNA binding|DNA binding|chromatin binding|RNA polymerase II transcription factor activity, sequence…	rno04371,rno04022,rno05418	Apelin signaling pathway|cGMP - PKG signaling pathway|Fluid shear stress and atherosclerosis	rno-Mef2a_0010	http://159.226.67.237:8080/new/circ_detail.php?ID=rno-Mef2a_0010	RNO_CIRCpedia_1712	NM_001014035	Mef2a
circRNA_0235|Chr1:128501692_128526855_-	25164	646	sense-overlapping	XM_006229346.3	Chr1:128486164_128604041_-	Lrrc28	GeneID:361588,Genbank:XM_006229346.3,RGD:1307209	leucine rich repeat containing 28, transcript variant X1	GO:0005886,GO:0007165	plasma membrane|signal transduction			rno-Lrrc28_0003	http://159.226.67.237:8080/new/circ_detail.php?ID=rno-Lrrc28_0003	RNO_CIRCpedia_1713	NM_001108486	Lrrc28
circRNA_0236|Chr1:128513529_128542649_-	29121	16104	sense-overlapping	XM_006229346.3	Chr1:128486164_128604041_-	Lrrc28	GeneID:361588,Genbank:XM_006229346.3,RGD:1307209	leucine rich repeat containing 28, transcript variant X1	GO:0005886,GO:0007165	plasma membrane|signal transduction
circRNA_0237|Chr1:128513529_128576607_-	63079	486	sense-overlapping	XM_006229346.3	Chr1:128486164_128604041_-	Lrrc28	GeneID:361588,Genbank:XM_006229346.3,RGD:1307209	leucine rich repeat containing 28, transcript variant X1	GO:0005886,GO:0007165	plasma membrane|signal transduction			rno-Lrrc28_0011	http://159.226.67.237:8080/new/circ_detail.php?ID=rno-Lrrc28_0011
circRNA_0238|Chr1:128542589_128576607_-	34019	33121	sense-overlapping	XM_006229346.3	Chr1:128486164_128604041_-	Lrrc28	GeneID:361588,Genbank:XM_006229346.3,RGD:1307209	leucine rich repeat containing 28, transcript variant X1	GO:0005886,GO:0007165	plasma membrane|signal transduction			rno-Lrrc28_0016	http://159.226.67.237:8080/new/circ_detail.php?ID=rno-Lrrc28_0016
circRNA_0239|Chr1:128575534_128576607_-	1074	176	sense-overlapping	XM_006229346.3	Chr1:128486164_128604041_-	Lrrc28	GeneID:361588,Genbank:XM_006229346.3,RGD:1307209	leucine rich repeat containing 28, transcript variant X1	GO:0005886,GO:0007165	plasma membrane|signal transduction			rno-Lrrc28_0002	http://159.226.67.237:8080/new/circ_detail.php?ID=rno-Lrrc28_0002
circRNA_0240|Chr1:128621052_128628362_+	7311	601	sense-overlapping	XM_017589157.1	Chr1:128604324_128687900_+	Ttc23	GeneID:308708,Genbank:XM_017589157.1,RGD:1310409	tetratricopeptide repeat domain 23, transcript variant X3
circRNA_0241|Chr1:128621052_128637195_+	16144	779	sense-overlapping	XM_017589157.1	Chr1:128604324_128687900_+	Ttc23	GeneID:308708,Genbank:XM_017589157.1,RGD:1310409	tetratricopeptide repeat domain 23, transcript variant X3					rno-Ttc23_0004	http://159.226.67.237:8080/new/circ_detail.php?ID=rno-Ttc23_0004
circRNA_0242|Chr1:128978104_128978649_+	546	546	exonic	NM_052807.2	Chr1:128924921_129207054_+	Igf1r	GeneID:25718,Genbank:NM_052807.2,RGD:2869	insulin-like growth factor 1 receptor	GO:0045471,GO:0045740,GO:0045840,GO:0004888,GO:0045893,GO:0005010,GO:0046328,GO:0051262,GO:0051291,GO:0046777,GO:0051389,GO:0005887,GO:0005158,GO:0005901,GO:0051446,GO:0006468,GO:0005515,GO:0051897,GO:0006955,GO:0090398,GO:0051898,GO:0097062,GO:0060740,GO:0007275,GO:0097242,GO:0070374,GO:0007409,GO:0021766,GO:0007420,GO:1902065,GO:0030010,GO:0007568,GO:1903944,GO:0030154,GO:0008286,GO:1904045,GO:…	response to ethanol|positive regulation of DNA replication|positive regulation of mitotic nuclear division|transmembrane signaling receptor activity|positive regulation of transcription, DNA-templated|insulin-like growth factor-activated receptor activity|regulation of JNK cascade|protein tetramerization|protein heterooligomerization|protein autophosphorylation|inactivation of MAPKK activity|inte…	rno04014,rno04015,rno04010,rno04066,rno04068,rno04151,rno04152,rno04150,rno04144,rno04140,rno04114,rno04510,rno04520,rno04550,rno04913,rno04914,rno04730,rno04211,rno04213,rno05200,rno05202,rno05205,rno05225,rno05214,rno05218,rno05215,rno05224,rno01521,rno01522	Ras signaling pathway|Rap1 signaling pathway|MAPK signaling pathway|HIF-1 signaling pathway|FoxO signaling pathway|PI3K-Akt signaling pathway|AMPK signaling pathway|mTOR signaling pathway|Endocytosis|Autophagy - animal|Oocyte meiosis|Focal adhesion|Adherens junction|Signaling pathways regulating pluripotency of stem cells|Ovarian Steroidogenesis|Progesterone-mediated oocyte maturation|Long-term d…	rno-Igf1r_0001	http://159.226.67.237:8080/new/circ_detail.php?ID=rno-Igf1r_0001	RNO_CIRCpedia_1716	NM_052807	Igf1r
circRNA_0243|Chr1:133353419_133411282_-	57864	572	sense-overlapping	XM_008759526.2	Chr1:133324881_133462445_-	Mctp2	GeneID:308742,Genbank:XM_008759526.2,RGD:1562967	multiple C2 domains, transmembrane 2, transcript variant X8	GO:0005654,GO:0005783,GO:0005829,GO:0016021,GO:0005509,GO:0005543,GO:0005544	nucleoplasm|endoplasmic reticulum|cytosol|integral component of membrane|calcium ion binding|phospholipid binding|calcium-dependent phospholipid binding			rno-Mctp2_0007	http://159.226.67.237:8080/new/circ_detail.php?ID=rno-Mctp2_0007
circRNA_0244|Chr1:133353419_133451349_-	97931	1059	sense-overlapping	XM_008759526.2	Chr1:133324881_133462445_-	Mctp2	GeneID:308742,Genbank:XM_008759526.2,RGD:1562967	multiple C2 domains, transmembrane 2, transcript variant X8	GO:0005654,GO:0005783,GO:0005829,GO:0016021,GO:0005509,GO:0005543,GO:0005544	nucleoplasm|endoplasmic reticulum|cytosol|integral component of membrane|calcium ion binding|phospholipid binding|calcium-dependent phospholipid binding			rno-Mctp2_0008	http://159.226.67.237:8080/new/circ_detail.php?ID=rno-Mctp2_0008
circRNA_0245|Chr1:133407797_133411282_-	3486	297	sense-overlapping	XM_008759526.2	Chr1:133324881_133462445_-	Mctp2	GeneID:308742,Genbank:XM_008759526.2,RGD:1562967	multiple C2 domains, transmembrane 2, transcript variant X8	GO:0005654,GO:0005783,GO:0005829,GO:0016021,GO:0005509,GO:0005543,GO:0005544	nucleoplasm|endoplasmic reticulum|cytosol|integral component of membrane|calcium ion binding|phospholipid binding|calcium-dependent phospholipid binding			rno-Mctp2_0003	http://159.226.67.237:8080/new/circ_detail.php?ID=rno-Mctp2_0003
circRNA_0246|Chr1:133407797_133433545_-	25749	503	sense-overlapping	XM_008759526.2	Chr1:133324881_133462445_-	Mctp2	GeneID:308742,Genbank:XM_008759526.2,RGD:1562967	multiple C2 domains, transmembrane 2, transcript variant X8	GO:0005654,GO:0005783,GO:0005829,GO:0016021,GO:0005509,GO:0005543,GO:0005544	nucleoplasm|endoplasmic reticulum|cytosol|integral component of membrane|calcium ion binding|phospholipid binding|calcium-dependent phospholipid binding			rno-Mctp2_0002	http://159.226.67.237:8080/new/circ_detail.php?ID=rno-Mctp2_0002
circRNA_0247|Chr1:133407797_133451349_-	43553	784	sense-overlapping	XM_008759526.2	Chr1:133324881_133462445_-	Mctp2	GeneID:308742,Genbank:XM_008759526.2,RGD:1562967	multiple C2 domains, transmembrane 2, transcript variant X8	GO:0005654,GO:0005783,GO:0005829,GO:0016021,GO:0005509,GO:0005543,GO:0005544	nucleoplasm|endoplasmic reticulum|cytosol|integral component of membrane|calcium ion binding|phospholipid binding|calcium-dependent phospholipid binding			rno-Mctp2_0001	http://159.226.67.237:8080/new/circ_detail.php?ID=rno-Mctp2_0001
circRNA_0248|Chr1:133407797_133462521_-	54725	1080	sense-overlapping	XM_008759525.2	Chr1:133324881_133463068_-	Mctp2	GeneID:308742,Genbank:XM_008759525.2,RGD:1562967	multiple C2 domains, transmembrane 2, transcript variant X6	GO:0005654,GO:0005783,GO:0005829,GO:0016021,GO:0005509,GO:0005543,GO:0005544	nucleoplasm|endoplasmic reticulum|cytosol|integral component of membrane|calcium ion binding|phospholipid binding|calcium-dependent phospholipid binding			rno-Mctp2_0005	http://159.226.67.237:8080/new/circ_detail.php?ID=rno-Mctp2_0005
circRNA_0249|Chr1:133448752_133462521_-	13770	577	sense-overlapping	XM_008759525.2	Chr1:133324881_133463068_-	Mctp2	GeneID:308742,Genbank:XM_008759525.2,RGD:1562967	multiple C2 domains, transmembrane 2, transcript variant X6	GO:0005654,GO:0005783,GO:0005829,GO:0016021,GO:0005509,GO:0005543,GO:0005544	nucleoplasm|endoplasmic reticulum|cytosol|integral component of membrane|calcium ion binding|phospholipid binding|calcium-dependent phospholipid binding
circRNA_0250|Chr1:133473455_133478761_-	5307	368	sense-overlapping	XM_017589161.1	Chr1:133324881_133554578_-	Mctp2	GeneID:308742,Genbank:XM_017589161.1,RGD:1562967	multiple C2 domains, transmembrane 2, transcript variant X3	GO:0005654,GO:0005783,GO:0005829,GO:0016021,GO:0005509,GO:0005543,GO:0005544	nucleoplasm|endoplasmic reticulum|cytosol|integral component of membrane|calcium ion binding|phospholipid binding|calcium-dependent phospholipid binding			rno-Mctp2_0004	http://159.226.67.237:8080/new/circ_detail.php?ID=rno-Mctp2_0004
circRNA_0251|Chr1:134794264_134848903_-	54640	30459	sense-overlapping	XM_006229369.3	Chr1:134757934_134870382_-	Chd2	GeneID:308738,Genbank:XM_006229369.3,RGD:1310056	chromodomain helicase DNA binding protein 2, transcript variant X1	GO:0005634,GO:0005654,GO:0005730,GO:0006974,GO:0007517,GO:0042393,GO:0043231,GO:0060218,GO:0001046,GO:0004386,GO:0005524	nucleus|nucleoplasm|nucleolus|cellular response to DNA damage stimulus|muscle organ development|histone binding|intracellular membrane-bounded organelle|hematopoietic stem cell differentiation|core promoter sequence-specific DNA binding|helicase activity|ATP binding			rno-Chd2_0013	http://159.226.67.237:8080/new/circ_detail.php?ID=rno-Chd2_0013
circRNA_0252|Chr1:134799596_134811320_-	11725	908	sense-overlapping	XM_006229369.3	Chr1:134757934_134870382_-	Chd2	GeneID:308738,Genbank:XM_006229369.3,RGD:1310056	chromodomain helicase DNA binding protein 2, transcript variant X1	GO:0005634,GO:0005654,GO:0005730,GO:0006974,GO:0007517,GO:0042393,GO:0043231,GO:0060218,GO:0001046,GO:0004386,GO:0005524	nucleus|nucleoplasm|nucleolus|cellular response to DNA damage stimulus|muscle organ development|histone binding|intracellular membrane-bounded organelle|hematopoietic stem cell differentiation|core promoter sequence-specific DNA binding|helicase activity|ATP binding					RNO_CIRCpedia_7561	ENSRNOT00000076300.2	Chd2
circRNA_0253|Chr1:134817263_134823065_-	5803	470	sense-overlapping	XM_006229369.3	Chr1:134757934_134870382_-	Chd2	GeneID:308738,Genbank:XM_006229369.3,RGD:1310056	chromodomain helicase DNA binding protein 2, transcript variant X1	GO:0005634,GO:0005654,GO:0005730,GO:0006974,GO:0007517,GO:0042393,GO:0043231,GO:0060218,GO:0001046,GO:0004386,GO:0005524	nucleus|nucleoplasm|nucleolus|cellular response to DNA damage stimulus|muscle organ development|histone binding|intracellular membrane-bounded organelle|hematopoietic stem cell differentiation|core promoter sequence-specific DNA binding|helicase activity|ATP binding			rno-Chd2_0011	http://159.226.67.237:8080/new/circ_detail.php?ID=rno-Chd2_0011
circRNA_0254|Chr1:134822116_134848903_-	26788	1938	sense-overlapping	XM_006229369.3	Chr1:134757934_134870382_-	Chd2	GeneID:308738,Genbank:XM_006229369.3,RGD:1310056	chromodomain helicase DNA binding protein 2, transcript variant X1	GO:0005634,GO:0005654,GO:0005730,GO:0006974,GO:0007517,GO:0042393,GO:0043231,GO:0060218,GO:0001046,GO:0004386,GO:0005524	nucleus|nucleoplasm|nucleolus|cellular response to DNA damage stimulus|muscle organ development|histone binding|intracellular membrane-bounded organelle|hematopoietic stem cell differentiation|core promoter sequence-specific DNA binding|helicase activity|ATP binding			rno-Chd2_0009	http://159.226.67.237:8080/new/circ_detail.php?ID=rno-Chd2_0009	RNO_CIRCpedia_7562	ENSRNOT00000076300.2	Chd2
circRNA_0255|Chr1:134843160_134848903_-	5744	381	sense-overlapping	XM_006229369.3	Chr1:134757934_134870382_-	Chd2	GeneID:308738,Genbank:XM_006229369.3,RGD:1310056	chromodomain helicase DNA binding protein 2, transcript variant X1	GO:0005634,GO:0005654,GO:0005730,GO:0006974,GO:0007517,GO:0042393,GO:0043231,GO:0060218,GO:0001046,GO:0004386,GO:0005524	nucleus|nucleoplasm|nucleolus|cellular response to DNA damage stimulus|muscle organ development|histone binding|intracellular membrane-bounded organelle|hematopoietic stem cell differentiation|core promoter sequence-specific DNA binding|helicase activity|ATP binding			rno-Chd2_0001	http://159.226.67.237:8080/new/circ_detail.php?ID=rno-Chd2_0001	RNO_CIRCpedia_6527	ENSRNOT00000076300.2	Chd2
circRNA_0256|Chr1:135860270_135871550_-	11281	363	sense-overlapping	XM_006229378.3	Chr1:135790854_136073640_-	Slco3a1	GeneID:140915,Genbank:XM_006229378.3,RGD:620227	solute carrier organic anion transporter family, member 3a1, transcript variant X1	GO:0006811,GO:0015347,GO:0015732,GO:0016021,GO:0043252,GO:0055085,GO:0005215,GO:0005886,GO:0005887	ion transport|sodium-independent organic anion transmembrane transporter activity|prostaglandin transport|integral component of membrane|sodium-independent organic anion transport|transmembrane transport|transporter activity|plasma membrane|integral component of plasma membrane			rno-Slco3a1_0003	http://159.226.67.237:8080/new/circ_detail.php?ID=rno-Slco3a1_0003
circRNA_0257|Chr1:137173179_137179777_+	6599	3189	sense-overlapping	NM_001106271.2	Chr1:137089558_137315272_+	Akap13	GeneID:293024,Genbank:NM_001106271.2,RGD:727893	A-kinase anchoring protein 13	GO:0005884,GO:0005938,GO:0006468,GO:0007186,GO:0035025,GO:0007507,GO:0043123,GO:0008104,GO:0043406,GO:0045859,GO:0046872,GO:0086023,GO:0048471,GO:0051018,GO:1900169,GO:0004691,GO:0005078,GO:0005089,GO:0005634,GO:0005829,GO:0010611,GO:0015629,GO:0017048,GO:0030864,GO:0032947,GO:0051168,GO:0055007,GO:0060297,GO:0060348,GO:0071875	actin filament|cell cortex|protein phosphorylation|G-protein coupled receptor signaling pathway|positive regulation of Rho protein signal transduction|heart development|positive regulation of I-kappaB kinase/NF-kappaB signaling|protein localization|positive regulation of MAP kinase activity|regulation of protein kinase activity|metal ion binding|adenylate cyclase-activating adrenergic receptor si…			rno-Akap13_0016	http://159.226.67.237:8080/new/circ_detail.php?ID=rno-Akap13_0016
circRNA_0258|Chr1:137247124_137264458_+	17335	602	sense-overlapping	NM_001106271.2	Chr1:137089558_137315272_+	Akap13	GeneID:293024,Genbank:NM_001106271.2,RGD:727893	A-kinase anchoring protein 13	GO:0005884,GO:0005938,GO:0006468,GO:0007186,GO:0035025,GO:0007507,GO:0043123,GO:0008104,GO:0043406,GO:0045859,GO:0046872,GO:0086023,GO:0048471,GO:0051018,GO:1900169,GO:0004691,GO:0005078,GO:0005089,GO:0005634,GO:0005829,GO:0010611,GO:0015629,GO:0017048,GO:0030864,GO:0032947,GO:0051168,GO:0055007,GO:0060297,GO:0060348,GO:0071875	actin filament|cell cortex|protein phosphorylation|G-protein coupled receptor signaling pathway|positive regulation of Rho protein signal transduction|heart development|positive regulation of I-kappaB kinase/NF-kappaB signaling|protein localization|positive regulation of MAP kinase activity|regulation of protein kinase activity|metal ion binding|adenylate cyclase-activating adrenergic receptor si…			rno-Akap13_0001	http://159.226.67.237:8080/new/circ_detail.php?ID=rno-Akap13_0001
circRNA_0259|Chr1:139943398_139956356_-	12959	548	sense-overlapping	NM_001270655.1	Chr1:139890537_140262503_-	Ntrk3	GeneID:29613,Genbank:NM_001270655.1,RGD:3214	neurotrophic receptor tyrosine kinase 3, transcript variant 2	GO:0004871,GO:0004888,GO:0005004,GO:0005030,GO:0005515,GO:0008284,GO:0005524,GO:0009968,GO:0005737,GO:0010628,GO:0016020,GO:0018108,GO:0019056,GO:0030154,GO:0043410,GO:0030335,GO:0045471,GO:0030424,GO:0046777,GO:0031434,GO:0048013,GO:0048665,GO:0048678,GO:0048691,GO:0000139,GO:0048712,GO:0000187,GO:0050927,GO:0001764,GO:0051412,GO:0001933,GO:0002039,GO:0004675,GO:0004709,GO:0004713,GO:0004714,GO:…	signal transducer activity|transmembrane signaling receptor activity|GPI-linked ephrin receptor activity|neurotrophin receptor activity|protein binding|positive regulation of cell proliferation|ATP binding|negative regulation of signal transduction|cytoplasm|positive regulation of gene expression|membrane|peptidyl-tyrosine phosphorylation|modulation by virus of host transcription|cell differentia…	rno04722,rno05230	Neurotrophin signaling pathway|Central carbon metabolism in cancer	rno-Ntrk3_0002	http://159.226.67.237:8080/new/circ_detail.php?ID=rno-Ntrk3_0002	RNO_CIRCpedia_1729	NM_001270655	Ntrk3
circRNA_0260|Chr1:140826373_140835144_-	8772	2237	sense-overlapping	NM_001008559.1	Chr1:140827279_140835151_-	Hapln3	GeneID:308773,Genbank:NM_001008559.1,RGD:1308098	hyaluronan and proteoglycan link protein 3	GO:0005578,GO:0007155,GO:0007417,GO:0001501,GO:0005201,GO:0005540	proteinaceous extracellular matrix|cell adhesion|central nervous system development|skeletal system development|extracellular matrix structural constituent|hyaluronic acid binding
circRNA_0261|Chr1:141024396_141026781_+	2386	301	sense-overlapping	NM_001106275.1	Chr1:140998240_141087405_+	Abhd2	GeneID:293050,Genbank:NM_001106275.1,RGD:1311389	abhydrolase domain containing 2	GO:0046464,GO:0009611,GO:0047372,GO:0016298,GO:0016788,GO:0030336,GO:0032570,GO:0034338,GO:0036126,GO:0048240,GO:0042562,GO:0051792,GO:0043401,GO:0051793,GO:0001669,GO:0097524,GO:0044255,GO:0003707,GO:0007340	acylglycerol catabolic process|response to wounding|acylglycerol lipase activity|lipase activity|hydrolase activity, acting on ester bonds|negative regulation of cell migration|response to progesterone|short-chain carboxylesterase activity|sperm flagellum|sperm capacitation|hormone binding|medium-chain fatty acid biosynthetic process|steroid hormone mediated signaling pathway|medium-chain fatty a…			rno-Abhd2_0002	http://159.226.67.237:8080/new/circ_detail.php?ID=rno-Abhd2_0002	RNO_CIRCpedia_1733	NM_001106275	Abhd2
circRNA_0262|Chr1:141053114_141055207_+	2094	344	sense-overlapping	NM_001106275.1	Chr1:140998240_141087405_+	Abhd2	GeneID:293050,Genbank:NM_001106275.1,RGD:1311389	abhydrolase domain containing 2	GO:0046464,GO:0009611,GO:0047372,GO:0016298,GO:0016788,GO:0030336,GO:0032570,GO:0034338,GO:0036126,GO:0048240,GO:0042562,GO:0051792,GO:0043401,GO:0051793,GO:0001669,GO:0097524,GO:0044255,GO:0003707,GO:0007340	acylglycerol catabolic process|response to wounding|acylglycerol lipase activity|lipase activity|hydrolase activity, acting on ester bonds|negative regulation of cell migration|response to progesterone|short-chain carboxylesterase activity|sperm flagellum|sperm capacitation|hormone binding|medium-chain fatty acid biosynthetic process|steroid hormone mediated signaling pathway|medium-chain fatty a…			rno-Abhd2_0003	http://159.226.67.237:8080/new/circ_detail.php?ID=rno-Abhd2_0003	RNO_CIRCpedia_1734	NM_001106275	Abhd2
circRNA_0263|Chr1:141127539_141127840_+	302	215	sense-overlapping	XM_017590455.1	Chr1:141116565_141172997_+	Fanci	GeneID:100360594,Genbank:XM_017590455.1,RGD:2321863	Fanconi anemia, complementation group I, transcript variant X1	GO:0005654,GO:0005829,GO:0006281,GO:0007095,GO:0008150,GO:0031398,GO:0070182,GO:0003674,GO:0005575	nucleoplasm|cytosol|DNA repair|mitotic G2 DNA damage checkpoint|biological_process|positive regulation of protein ubiquitination|DNA polymerase binding|molecular_function|cellular_component	rno03460	Fanconi anemia pathway	rno-Fanci_0001	http://159.226.67.237:8080/new/circ_detail.php?ID=rno-Fanci_0001
circRNA_0264|Chr1:141447858_141450862_+	3005	192	antisense	XM_006229414.3	Chr1:141434183_141452589_-	Kif7	GeneID:293047,Genbank:XM_006229414.3,RGD:1310310	kinesin family member 7, transcript variant X3	GO:0035904,GO:0003777,GO:0036064,GO:0005524,GO:0042802,GO:0005575,GO:0005871,GO:0005874,GO:0005929,GO:0045879,GO:0007018,GO:0045880,GO:0008017,GO:0060976,GO:0008150,GO:0003279,GO:0008574,GO:0003674,GO:0016887	aorta development|microtubule motor activity|ciliary basal body|ATP binding|identical protein binding|cellular_component|kinesin complex|microtubule|cilium|negative regulation of smoothened signaling pathway|microtubule-based movement|positive regulation of smoothened signaling pathway|microtubule binding|coronary vasculature development|biological_process|cardiac septum development|ATP-dependent…	rno04340,rno05200,rno05217	Hedgehog signaling pathway|Pathways in cancer|Basal cell carcinoma
circRNA_0265|Chr1:141641684_141655417_-	13734	276	sense-overlapping	NM_001115039.1	Chr1:141612961_141655417_-	Ap3s2	GeneID:683402,Genbank:NM_001115039.1,RGD:1586888	adaptor-related protein complex 3, sigma 2 subunit	GO:0030123,GO:0043231,GO:0048490,GO:1904115,GO:0006886,GO:0008089,GO:0008565	AP-3 adaptor complex|intracellular membrane-bounded organelle|anterograde synaptic vesicle transport|axon cytoplasm|intracellular protein transport|anterograde axonal transport|protein transporter activity	rno04142	Lysosome	rno-Ap3s2_0001	http://159.226.67.237:8080/new/circ_detail.php?ID=rno-Ap3s2_0001
circRNA_0266|Chr1:141759827_141763820_-	3994	3994	antisense	XM_008759508.2	Chr1:141763621_141870127_+	Zfp710	GeneID:293044,Genbank:XM_008759508.2,RGD:1306491	zinc finger protein 710, transcript variant X2	GO:0003676,GO:0005634	nucleic acid binding|nucleus
circRNA_0267|Chr1:141877382_141880461_-	3080	760	sense-overlapping	NM_001014161.1	Chr1:141874354_141893674_-	Idh2	GeneID:361596,Genbank:NM_001014161.1,RGD:1597139	isocitrate dehydrogenase (NADP(+)) 2, mitochondrial	GO:0006741,GO:0004450,GO:0051287,GO:0060253,GO:0005575,GO:0005739,GO:0005777,GO:1903976,GO:0005829,GO:1904465,GO:0006097,GO:0006099,GO:0006102,GO:0000287,GO:0006103,GO:0004448	NADP biosynthetic process|isocitrate dehydrogenase (NADP+) activity|NAD binding|negative regulation of glial cell proliferation|cellular_component|mitochondrion|peroxisome|negative regulation of glial cell migration|cytosol|negative regulation of matrix metallopeptidase secretion|glyoxylate cycle|tricarboxylic acid cycle|isocitrate metabolic process|magnesium ion binding|2-oxoglutarate metabolic …	rno00020,rno00480,rno04146	Citrate cycle (TCA cycle)|Glutathione metabolism|Peroxisome	rno-Idh2_0003	http://159.226.67.237:8080/new/circ_detail.php?ID=rno-Idh2_0003	RNO_CIRCpedia_1736	ENSRNOT00000085988.1	Idh2
circRNA_0268|Chr1:142003533_142005043_+	1511	477	sense-overlapping	NM_001170462.1	Chr1:141986145_142014400_+	Sema4b	GeneID:293042,Genbank:NM_001170462.1,RGD:1307872	semaphorin 4B	GO:0005886,GO:0016020,GO:0030215,GO:0030335,GO:0038191,GO:0045202,GO:0045499,GO:0048843,GO:0050919,GO:0071526,GO:0001755,GO:0005615	plasma membrane|membrane|semaphorin receptor binding|positive regulation of cell migration|neuropilin binding|synapse|chemorepellent activity|negative regulation of axon extension involved in axon guidance|negative chemotaxis|semaphorin-plexin signaling pathway|neural crest cell migration|extracellular space	rno04360	Axon guidance
circRNA_0269|Chr1:142160925_142161359_-	435	317	sense-overlapping	XM_017589165.1	Chr1:142141695_142163518_-	Man2a2	GeneID:308757,Genbank:XM_017589165.1,RGD:1310238	mannosidase, alpha, class 2A, member 2, transcript variant X3	GO:0006013,GO:0006491,GO:0006517,GO:0015923,GO:0016021,GO:0016799,GO:0030246,GO:0046872,GO:0000139,GO:0004559	mannose metabolic process|N-glycan processing|protein deglycosylation|mannosidase activity|integral component of membrane|hydrolase activity, hydrolyzing N-glycosyl compounds|carbohydrate binding|metal ion binding|Golgi membrane|alpha-mannosidase activity	rno00510	N-Glycan biosynthesis	rno-Man2a2_0003	http://159.226.67.237:8080/new/circ_detail.php?ID=rno-Man2a2_0003	RNO_CIRCpedia_1738	NM_001107527	Man2a2
circRNA_0270|Chr1:142191060_142191760_-	701	262	sense-overlapping	XM_008759556.1	Chr1:142185092_142197296_-	Furin	GeneID:54281,Genbank:XM_008759556.1,RGD:3274	furin (paired basic amino acid cleaving enzyme), transcript variant X2	GO:0004867,GO:0005615,GO:0005783,GO:0005789,GO:0005802,GO:0016021,GO:0005886,GO:0016485,GO:0006465,GO:0016486,GO:0019058,GO:0032911,GO:0030140,GO:0032940,GO:0042176,GO:0042277,GO:0000139,GO:0043043,GO:0002020,GO:0045121,GO:0004175,GO:0004252,GO:0007568,GO:0008233,GO:0008283,GO:0009966,GO:0009986,GO:0030335,GO:0030511,GO:0010008,GO:0031638,GO:0010951,GO:0031985,GO:0032804,GO:0032902,GO:0045714,GO:…	serine-type endopeptidase inhibitor activity|extracellular space|endoplasmic reticulum|endoplasmic reticulum membrane|trans-Golgi network|integral component of membrane|plasma membrane|protein processing|signal peptide processing|peptide hormone processing|viral life cycle|negative regulation of transforming growth factor beta1 production|trans-Golgi network transport vesicle|secretion by cell|re…	rno05164	Influenza A	rno-Furin_0001	http://159.226.67.237:8080/new/circ_detail.php?ID=rno-Furin_0001	RNO_CIRCpedia_9438	NM_019331	Furin
circRNA_0271|Chr1:142556681_142565170_-	8490	691	sense-overlapping	NM_001108489.1	Chr1:142525041_142615673_-	Iqgap1	GeneID:361598,Genbank:NM_001108489.1,RGD:1311884	IQ motif containing GTPase activating protein 1	GO:0005886,GO:0005911,GO:0005925,GO:0007173,GO:0007346,GO:0008543,GO:0032991,GO:0015629,GO:0035305,GO:0015630,GO:0036120,GO:0016020,GO:0036464,GO:0043005,GO:0043087,GO:0071277,GO:0043406,GO:0071364,GO:0043539,GO:1900006,GO:0044344,GO:1900086,GO:1903829,GO:1904754,GO:1990138,GO:0001726,GO:1990776,GO:0001817,GO:0005515,GO:0005516,GO:0005547,GO:0005634,GO:0005737,GO:0005874,GO:0016328,GO:0017048,GO:…	plasma membrane|cell-cell junction|focal adhesion|epidermal growth factor receptor signaling pathway|regulation of mitotic cell cycle|fibroblast growth factor receptor signaling pathway|protein-containing complex|actin cytoskeleton|negative regulation of dephosphorylation|microtubule cytoskeleton|cellular response to platelet-derived growth factor stimulus|membrane|cytoplasmic ribonucleoprotein g…	rno04520,rno04810,rno05205	Adherens junction|Regulation of actin cytoskeleton|Proteoglycans in cancer	rno-Iqgap1_0011	http://159.226.67.237:8080/new/circ_detail.php?ID=rno-Iqgap1_0011	RNO_CIRCpedia_5106	NM_001108489	Iqgap1
circRNA_0272|Chr1:142573744_142576627_-	2884	446	sense-overlapping	NM_001108489.1	Chr1:142525041_142615673_-	Iqgap1	GeneID:361598,Genbank:NM_001108489.1,RGD:1311884	IQ motif containing GTPase activating protein 1	GO:0005886,GO:0005911,GO:0005925,GO:0007173,GO:0007346,GO:0008543,GO:0032991,GO:0015629,GO:0035305,GO:0015630,GO:0036120,GO:0016020,GO:0036464,GO:0043005,GO:0043087,GO:0071277,GO:0043406,GO:0071364,GO:0043539,GO:1900006,GO:0044344,GO:1900086,GO:1903829,GO:1904754,GO:1990138,GO:0001726,GO:1990776,GO:0001817,GO:0005515,GO:0005516,GO:0005547,GO:0005634,GO:0005737,GO:0005874,GO:0016328,GO:0017048,GO:…	plasma membrane|cell-cell junction|focal adhesion|epidermal growth factor receptor signaling pathway|regulation of mitotic cell cycle|fibroblast growth factor receptor signaling pathway|protein-containing complex|actin cytoskeleton|negative regulation of dephosphorylation|microtubule cytoskeleton|cellular response to platelet-derived growth factor stimulus|membrane|cytoplasmic ribonucleoprotein g…	rno04520,rno04810,rno05205	Adherens junction|Regulation of actin cytoskeleton|Proteoglycans in cancer	rno-Iqgap1_0002	http://159.226.67.237:8080/new/circ_detail.php?ID=rno-Iqgap1_0002
circRNA_0273|Chr1:142733786_142740091_-	6306	343	sense-overlapping	XM_008759558.1	Chr1:142733423_142751227_-	Sec11a	GeneID:65166,Genbank:XM_008759558.1,RGD:69360	SEC11 homolog A, signal peptidase complex subunit, transcript variant X1	GO:0006465,GO:0008233,GO:0008236,GO:0016021,GO:0031090,GO:0005787	signal peptide processing|peptidase activity|serine-type peptidase activity|integral component of membrane|organelle membrane|signal peptidase complex	rno03060	Protein export	rno-Sec11a_0002	http://159.226.67.237:8080/new/circ_detail.php?ID=rno-Sec11a_0002
circRNA_0274|Chr1:142733786_142745035_-	11250	493	sense-overlapping	XM_008759558.1	Chr1:142733423_142751227_-	Sec11a	GeneID:65166,Genbank:XM_008759558.1,RGD:69360	SEC11 homolog A, signal peptidase complex subunit, transcript variant X1	GO:0006465,GO:0008233,GO:0008236,GO:0016021,GO:0031090,GO:0005787	signal peptide processing|peptidase activity|serine-type peptidase activity|integral component of membrane|organelle membrane|signal peptidase complex	rno03060	Protein export	rno-Sec11a_0003	http://159.226.67.237:8080/new/circ_detail.php?ID=rno-Sec11a_0003
circRNA_0275|Chr1:142849916_142852148_+	2233	2233	exonic	XM_006229425.3	Chr1:142833999_142867706_+	Zfp592	GeneID:293038,Genbank:XM_006229425.3,RGD:1308705	zinc finger protein 592, transcript variant X2	GO:0003676	nucleic acid binding			rno-Zfp592_0001	http://159.226.67.237:8080/new/circ_detail.php?ID=rno-Zfp592_0001	RNO_CIRCpedia_1740	ENSRNOT00000091569.1	Zfp592
circRNA_0276|Chr1:142849916_142856237_+	6322	2412	sense-overlapping	XM_006229425.3	Chr1:142833999_142867706_+	Zfp592	GeneID:293038,Genbank:XM_006229425.3,RGD:1308705	zinc finger protein 592, transcript variant X2	GO:0003676	nucleic acid binding			rno-Zfp592_0002	http://159.226.67.237:8080/new/circ_detail.php?ID=rno-Zfp592_0002	RNO_CIRCpedia_1741	ENSRNOT00000091569.1	Zfp592
circRNA_0277|Chr1:143107055_143109260_+	2206	248	sense-overlapping	XM_006229439.3	Chr1:143036083_143160395_+	Pde8a	GeneID:308776,Genbank:XM_006229439.3,RGD:735125	phosphodiesterase 8A, transcript variant X2	GO:0005575,GO:0007165,GO:0008150,GO:0019900,GO:0046872,GO:0060548,GO:0070374,GO:0071364,GO:1903206,GO:0001934,GO:0003674,GO:0004115	cellular_component|signal transduction|biological_process|kinase binding|metal ion binding|negative regulation of cell death|positive regulation of ERK1 and ERK2 cascade|cellular response to epidermal growth factor stimulus|negative regulation of hydrogen peroxide-induced cell death|positive regulation of protein phosphorylation|molecular_function|3',5'-cyclic-AMP phosphodiesterase activity	rno00230,rno04927,rno05032,rno04934	Purine metabolism|Cortisol synthesis and secretion|Morphine addiction|Cushing's syndrome	rno-Pde8a_0001	http://159.226.67.237:8080/new/circ_detail.php?ID=rno-Pde8a_0001
circRNA_0278|Chr1:143107055_143128651_+	21597	666	sense-overlapping	XM_006229438.3	Chr1:143036086_143160395_+	Pde8a	GeneID:308776,Genbank:XM_006229438.3,RGD:735125	phosphodiesterase 8A, transcript variant X1	GO:0005575,GO:0007165,GO:0008150,GO:0019900,GO:0046872,GO:0060548,GO:0070374,GO:0071364,GO:1903206,GO:0001934,GO:0003674,GO:0004115	cellular_component|signal transduction|biological_process|kinase binding|metal ion binding|negative regulation of cell death|positive regulation of ERK1 and ERK2 cascade|cellular response to epidermal growth factor stimulus|negative regulation of hydrogen peroxide-induced cell death|positive regulation of protein phosphorylation|molecular_function|3',5'-cyclic-AMP phosphodiesterase activity	rno00230,rno04927,rno05032,rno04934	Purine metabolism|Cortisol synthesis and secretion|Morphine addiction|Cushing's syndrome	rno-Pde8a_0007	http://159.226.67.237:8080/new/circ_detail.php?ID=rno-Pde8a_0007
circRNA_0279|Chr1:143143055_143143524_+	470	233	sense-overlapping	XM_006229439.3	Chr1:143036083_143160395_+	Pde8a	GeneID:308776,Genbank:XM_006229439.3,RGD:735125	phosphodiesterase 8A, transcript variant X2	GO:0005575,GO:0007165,GO:0008150,GO:0019900,GO:0046872,GO:0060548,GO:0070374,GO:0071364,GO:1903206,GO:0001934,GO:0003674,GO:0004115	cellular_component|signal transduction|biological_process|kinase binding|metal ion binding|negative regulation of cell death|positive regulation of ERK1 and ERK2 cascade|cellular response to epidermal growth factor stimulus|negative regulation of hydrogen peroxide-induced cell death|positive regulation of protein phosphorylation|molecular_function|3',5'-cyclic-AMP phosphodiesterase activity	rno00230,rno04927,rno05032,rno04934	Purine metabolism|Cortisol synthesis and secretion|Morphine addiction|Cushing's syndrome	rno-Pde8a_0005	http://159.226.67.237:8080/new/circ_detail.php?ID=rno-Pde8a_0005
circRNA_0280|Chr1:143417972_143419383_+	1412	336	sense-overlapping	NM_001130728.1	Chr1:143401986_143430356_+	Whamm	GeneID:293057,Genbank:NM_001130728.1,RGD:1563506	WAS protein homolog associated with actin, golgi membranes and microtubules	GO:0048041,GO:0005829,GO:0051127,GO:0071933,GO:0006888,GO:0007015,GO:0007050,GO:0008017,GO:0017049,GO:0090527,GO:0097320,GO:0030032,GO:0033116,GO:0000139,GO:0003779,GO:0034314,GO:0005737	focal adhesion assembly|cytosol|positive regulation of actin nucleation|Arp2/3 complex binding|ER to Golgi vesicle-mediated transport|actin filament organization|cell cycle arrest|microtubule binding|GTP-Rho binding|actin filament reorganization|plasma membrane tubulation|lamellipodium assembly|endoplasmic reticulum-Golgi intermediate compartment membrane|Golgi membrane|actin binding|Arp2/3 compl…	rno04530	Tight junction	rno-Whamm_0001	http://159.226.67.237:8080/new/circ_detail.php?ID=rno-Whamm_0001
circRNA_0281|Chr1:143703224_143723739_-	20516	2168	sense-overlapping	NM_145785.1	Chr1:143702864_143751789_-	Hdgfrp3	GeneID:252941,Genbank:NM_145785.1,RGD:628773	hepatoma-derived growth factor, related protein 3	GO:0031175,GO:0005654,GO:0046785,GO:0005737,GO:0005829,GO:0007026,GO:0008017,GO:0008083,GO:0010469,GO:0005576,GO:0015631,GO:0005634	neuron projection development|nucleoplasm|microtubule polymerization|cytoplasm|cytosol|negative regulation of microtubule depolymerization|microtubule binding|growth factor activity|regulation of signaling receptor activity|extracellular region|tubulin binding|nucleus
circRNA_0282|Chr1:143712491_143718900_-	6410	442	sense-overlapping	NM_145785.1	Chr1:143702864_143751789_-	Hdgfrp3	GeneID:252941,Genbank:NM_145785.1,RGD:628773	hepatoma-derived growth factor, related protein 3	GO:0031175,GO:0005654,GO:0046785,GO:0005737,GO:0005829,GO:0007026,GO:0008017,GO:0008083,GO:0010469,GO:0005576,GO:0015631,GO:0005634	neuron projection development|nucleoplasm|microtubule polymerization|cytoplasm|cytosol|negative regulation of microtubule depolymerization|microtubule binding|growth factor activity|regulation of signaling receptor activity|extracellular region|tubulin binding|nucleus			rno-Hdgfl3_0002	http://159.226.67.237:8080/new/circ_detail.php?ID=rno-Hdgfl3_0002	RNO_CIRCpedia_1742	ENSRNOT00000026754.7	Hdgfrp3
circRNA_0283|Chr1:143712491_143723739_-	11249	519	sense-overlapping	NM_145785.1	Chr1:143702864_143751789_-	Hdgfrp3	GeneID:252941,Genbank:NM_145785.1,RGD:628773	hepatoma-derived growth factor, related protein 3	GO:0031175,GO:0005654,GO:0046785,GO:0005737,GO:0005829,GO:0007026,GO:0008017,GO:0008083,GO:0010469,GO:0005576,GO:0015631,GO:0005634	neuron projection development|nucleoplasm|microtubule polymerization|cytoplasm|cytosol|negative regulation of microtubule depolymerization|microtubule binding|growth factor activity|regulation of signaling receptor activity|extracellular region|tubulin binding|nucleus			rno-Hdgfl3_0001	http://159.226.67.237:8080/new/circ_detail.php?ID=rno-Hdgfl3_0001	RNO_CIRCpedia_1743	ENSRNOT00000026754.7	Hdgfrp3
circRNA_0284|Chr1:144634000_144639565_+	5566	561	sense-overlapping	NM_001107534.1	Chr1:144601425_144740634_+	Efl1	GeneID:308789,Genbank:NM_001107534.1,RGD:1306521	elongation factor like GTPase 1	GO:0042256,GO:0043022,GO:0046039,GO:0003924,GO:0005525,GO:0006414	mature ribosome assembly|ribosome binding|GTP metabolic process|GTPase activity|GTP binding|translational elongation	rno03008	Ribosome biogenesis in eukaryotes	rno-Efl1_0006	http://159.226.67.237:8080/new/circ_detail.php?ID=rno-Efl1_0006
circRNA_0285|Chr1:148425541_148428477_-	2937	426	sense-overlapping	XM_006229645.3	Chr1:148425046_148443505_-	Vbp1	GeneID:681825,Genbank:XM_006229645.3,RGD:1590535	VHL binding protein 1, transcript variant X1	GO:0006457,GO:0007017,GO:0007021,GO:0015631,GO:0016272,GO:0043231,GO:0005737,GO:0005829,GO:0005844	protein folding|microtubule-based process|tubulin complex assembly|tubulin binding|prefoldin complex|intracellular membrane-bounded organelle|cytoplasm|cytosol|polysome			rno-Vbp1_0001	http://159.226.67.237:8080/new/circ_detail.php?ID=rno-Vbp1_0001
circRNA_0286|Chr1:150380670_150382015_-	1346	313	sense-overlapping	NM_057185.2	Chr1:150323768_150395415_-	Folh1	GeneID:85309,Genbank:NM_057185.2,RGD:70963	folate hydrolase 1	GO:0016805,GO:0005886,GO:0035609,GO:0005887,GO:0006508,GO:0006760,GO:0043065,GO:0046872,GO:0008233,GO:1904492,GO:0009986,GO:0004180,GO:1904493,GO:0016021,GO:0004181	dipeptidase activity|plasma membrane|C-terminal protein deglutamylation|integral component of plasma membrane|proteolysis|folic acid-containing compound metabolic process|positive regulation of apoptotic process|metal ion binding|peptidase activity|Ac-Asp-Glu binding|cell surface|carboxypeptidase activity|tetrahydrofolyl-poly(glutamate) polymer binding|integral component of membrane|metallocarbox…	rno00250,rno04977	Alanine, aspartate and glutamate metabolism|Vitamin digestion and absorption	rno-Folh1_0002	http://159.226.67.237:8080/new/circ_detail.php?ID=rno-Folh1_0002
circRNA_0287|Chr1:154147196_154152113_-	4918	493	sense-overlapping	XM_008759638.1	Chr1:154147098_154165450_-	Hikeshi	GeneID:293103,Genbank:XM_008759638.1,RGD:1359455	Hikeshi, heat shock protein nuclear import factor, transcript variant X3	GO:0034605,GO:0008565,GO:0005634,GO:0015031,GO:0005737,GO:0005829,GO:0006606,GO:0030324,GO:0030544,GO:0007030,GO:0005622	cellular response to heat|protein transporter activity|nucleus|protein transport|cytoplasm|cytosol|protein import into nucleus|lung development|Hsp70 protein binding|Golgi organization|intracellular			rno-Hikeshi_0002	http://159.226.67.237:8080/new/circ_detail.php?ID=rno-Hikeshi_0002
circRNA_0288|Chr1:154405931_154406882_+	952	219	sense-overlapping	XM_006229671.3	Chr1:154377229_154458966_+	Picalm	GeneID:89816,Genbank:XM_006229671.3,RGD:621054	phosphatidylinositol binding clathrin assembly protein, transcript variant X3	GO:0072583,GO:0090647,GO:0005769,GO:0097418,GO:0005794,GO:0005886,GO:1901216,GO:0097494,GO:0005905,GO:1902003,GO:1902004,GO:0097753,GO:0006897,GO:0010629,GO:0006898,GO:1902803,GO:0007409,GO:1902959,GO:0014069,GO:2000809,GO:0016050,GO:1902961,GO:0016188,GO:0030132,GO:0030136,GO:0016192,GO:0016197,GO:0030276,GO:0000149,GO:0035615,GO:0005515,GO:0031224,GO:0005545,GO:0042734,GO:0031623,GO:0042802,GO:…	clathrin-dependent endocytosis|modulation of age-related behavioral decline|early endosome|neurofibrillary tangle|Golgi apparatus|plasma membrane|positive regulation of neuron death|regulation of vesicle size|clathrin-coated pit|regulation of amyloid-beta formation|positive regulation of amyloid-beta formation|membrane bending|endocytosis|negative regulation of gene expression|receptor-mediated e…			rno-Picalm_0015	http://159.226.67.237:8080/new/circ_detail.php?ID=rno-Picalm_0015	RNO_CIRCpedia_9443	ENSRNOT00000092945.1	Picalm
circRNA_0289|Chr1:154405931_154411147_+	5217	322	sense-overlapping	XM_006229671.3	Chr1:154377229_154458966_+	Picalm	GeneID:89816,Genbank:XM_006229671.3,RGD:621054	phosphatidylinositol binding clathrin assembly protein, transcript variant X3	GO:0072583,GO:0090647,GO:0005769,GO:0097418,GO:0005794,GO:0005886,GO:1901216,GO:0097494,GO:0005905,GO:1902003,GO:1902004,GO:0097753,GO:0006897,GO:0010629,GO:0006898,GO:1902803,GO:0007409,GO:1902959,GO:0014069,GO:2000809,GO:0016050,GO:1902961,GO:0016188,GO:0030132,GO:0030136,GO:0016192,GO:0016197,GO:0030276,GO:0000149,GO:0035615,GO:0005515,GO:0031224,GO:0005545,GO:0042734,GO:0031623,GO:0042802,GO:…	clathrin-dependent endocytosis|modulation of age-related behavioral decline|early endosome|neurofibrillary tangle|Golgi apparatus|plasma membrane|positive regulation of neuron death|regulation of vesicle size|clathrin-coated pit|regulation of amyloid-beta formation|positive regulation of amyloid-beta formation|membrane bending|endocytosis|negative regulation of gene expression|receptor-mediated e…			rno-Picalm_0006	http://159.226.67.237:8080/new/circ_detail.php?ID=rno-Picalm_0006	RNO_CIRCpedia_7566	ENSRNOT00000092945.1	Picalm
circRNA_0290|Chr1:154405931_154425509_+	19579	1128	sense-overlapping	XM_006229671.3	Chr1:154377229_154458966_+	Picalm	GeneID:89816,Genbank:XM_006229671.3,RGD:621054	phosphatidylinositol binding clathrin assembly protein, transcript variant X3	GO:0072583,GO:0090647,GO:0005769,GO:0097418,GO:0005794,GO:0005886,GO:1901216,GO:0097494,GO:0005905,GO:1902003,GO:1902004,GO:0097753,GO:0006897,GO:0010629,GO:0006898,GO:1902803,GO:0007409,GO:1902959,GO:0014069,GO:2000809,GO:0016050,GO:1902961,GO:0016188,GO:0030132,GO:0030136,GO:0016192,GO:0016197,GO:0030276,GO:0000149,GO:0035615,GO:0005515,GO:0031224,GO:0005545,GO:0042734,GO:0031623,GO:0042802,GO:…	clathrin-dependent endocytosis|modulation of age-related behavioral decline|early endosome|neurofibrillary tangle|Golgi apparatus|plasma membrane|positive regulation of neuron death|regulation of vesicle size|clathrin-coated pit|regulation of amyloid-beta formation|positive regulation of amyloid-beta formation|membrane bending|endocytosis|negative regulation of gene expression|receptor-mediated e…			rno-Picalm_0003	http://159.226.67.237:8080/new/circ_detail.php?ID=rno-Picalm_0003	RNO_CIRCpedia_1759	ENSRNOT00000092945.1	Picalm
circRNA_0291|Chr1:154405931_154447475_+	41545	1817	sense-overlapping	XM_006229671.3	Chr1:154377229_154458966_+	Picalm	GeneID:89816,Genbank:XM_006229671.3,RGD:621054	phosphatidylinositol binding clathrin assembly protein, transcript variant X3	GO:0072583,GO:0090647,GO:0005769,GO:0097418,GO:0005794,GO:0005886,GO:1901216,GO:0097494,GO:0005905,GO:1902003,GO:1902004,GO:0097753,GO:0006897,GO:0010629,GO:0006898,GO:1902803,GO:0007409,GO:1902959,GO:0014069,GO:2000809,GO:0016050,GO:1902961,GO:0016188,GO:0030132,GO:0030136,GO:0016192,GO:0016197,GO:0030276,GO:0000149,GO:0035615,GO:0005515,GO:0031224,GO:0005545,GO:0042734,GO:0031623,GO:0042802,GO:…	clathrin-dependent endocytosis|modulation of age-related behavioral decline|early endosome|neurofibrillary tangle|Golgi apparatus|plasma membrane|positive regulation of neuron death|regulation of vesicle size|clathrin-coated pit|regulation of amyloid-beta formation|positive regulation of amyloid-beta formation|membrane bending|endocytosis|negative regulation of gene expression|receptor-mediated e…			rno-Picalm_0002	http://159.226.67.237:8080/new/circ_detail.php?ID=rno-Picalm_0002	RNO_CIRCpedia_5111	ENSRNOT00000092945.1	Picalm
circRNA_0292|Chr1:154406807_154418787_+	11981	492	sense-overlapping	XM_006229671.3	Chr1:154377229_154458966_+	Picalm	GeneID:89816,Genbank:XM_006229671.3,RGD:621054	phosphatidylinositol binding clathrin assembly protein, transcript variant X3	GO:0072583,GO:0090647,GO:0005769,GO:0097418,GO:0005794,GO:0005886,GO:1901216,GO:0097494,GO:0005905,GO:1902003,GO:1902004,GO:0097753,GO:0006897,GO:0010629,GO:0006898,GO:1902803,GO:0007409,GO:1902959,GO:0014069,GO:2000809,GO:0016050,GO:1902961,GO:0016188,GO:0030132,GO:0030136,GO:0016192,GO:0016197,GO:0030276,GO:0000149,GO:0035615,GO:0005515,GO:0031224,GO:0005545,GO:0042734,GO:0031623,GO:0042802,GO:…	clathrin-dependent endocytosis|modulation of age-related behavioral decline|early endosome|neurofibrillary tangle|Golgi apparatus|plasma membrane|positive regulation of neuron death|regulation of vesicle size|clathrin-coated pit|regulation of amyloid-beta formation|positive regulation of amyloid-beta formation|membrane bending|endocytosis|negative regulation of gene expression|receptor-mediated e…			rno-Picalm_0025	http://159.226.67.237:8080/new/circ_detail.php?ID=rno-Picalm_0025	RNO_CIRCpedia_5112	ENSRNOT00000092945.1	Picalm
circRNA_0293|Chr1:154411045_154425509_+	14465	909	sense-overlapping	XM_006229671.3	Chr1:154377229_154458966_+	Picalm	GeneID:89816,Genbank:XM_006229671.3,RGD:621054	phosphatidylinositol binding clathrin assembly protein, transcript variant X3	GO:0072583,GO:0090647,GO:0005769,GO:0097418,GO:0005794,GO:0005886,GO:1901216,GO:0097494,GO:0005905,GO:1902003,GO:1902004,GO:0097753,GO:0006897,GO:0010629,GO:0006898,GO:1902803,GO:0007409,GO:1902959,GO:0014069,GO:2000809,GO:0016050,GO:1902961,GO:0016188,GO:0030132,GO:0030136,GO:0016192,GO:0016197,GO:0030276,GO:0000149,GO:0035615,GO:0005515,GO:0031224,GO:0005545,GO:0042734,GO:0031623,GO:0042802,GO:…	clathrin-dependent endocytosis|modulation of age-related behavioral decline|early endosome|neurofibrillary tangle|Golgi apparatus|plasma membrane|positive regulation of neuron death|regulation of vesicle size|clathrin-coated pit|regulation of amyloid-beta formation|positive regulation of amyloid-beta formation|membrane bending|endocytosis|negative regulation of gene expression|receptor-mediated e…			rno-Picalm_0017	http://159.226.67.237:8080/new/circ_detail.php?ID=rno-Picalm_0017
circRNA_0294|Chr1:154439745_154442136_+	2392	371	sense-overlapping	XM_006229671.3	Chr1:154377229_154458966_+	Picalm	GeneID:89816,Genbank:XM_006229671.3,RGD:621054	phosphatidylinositol binding clathrin assembly protein, transcript variant X3	GO:0072583,GO:0090647,GO:0005769,GO:0097418,GO:0005794,GO:0005886,GO:1901216,GO:0097494,GO:0005905,GO:1902003,GO:1902004,GO:0097753,GO:0006897,GO:0010629,GO:0006898,GO:1902803,GO:0007409,GO:1902959,GO:0014069,GO:2000809,GO:0016050,GO:1902961,GO:0016188,GO:0030132,GO:0030136,GO:0016192,GO:0016197,GO:0030276,GO:0000149,GO:0035615,GO:0005515,GO:0031224,GO:0005545,GO:0042734,GO:0031623,GO:0042802,GO:…	clathrin-dependent endocytosis|modulation of age-related behavioral decline|early endosome|neurofibrillary tangle|Golgi apparatus|plasma membrane|positive regulation of neuron death|regulation of vesicle size|clathrin-coated pit|regulation of amyloid-beta formation|positive regulation of amyloid-beta formation|membrane bending|endocytosis|negative regulation of gene expression|receptor-mediated e…			rno-Picalm_0016	http://159.226.67.237:8080/new/circ_detail.php?ID=rno-Picalm_0016
circRNA_0295|Chr1:154439745_154446214_+	6470	455	sense-overlapping	XM_006229671.3	Chr1:154377229_154458966_+	Picalm	GeneID:89816,Genbank:XM_006229671.3,RGD:621054	phosphatidylinositol binding clathrin assembly protein, transcript variant X3	GO:0072583,GO:0090647,GO:0005769,GO:0097418,GO:0005794,GO:0005886,GO:1901216,GO:0097494,GO:0005905,GO:1902003,GO:1902004,GO:0097753,GO:0006897,GO:0010629,GO:0006898,GO:1902803,GO:0007409,GO:1902959,GO:0014069,GO:2000809,GO:0016050,GO:1902961,GO:0016188,GO:0030132,GO:0030136,GO:0016192,GO:0016197,GO:0030276,GO:0000149,GO:0035615,GO:0005515,GO:0031224,GO:0005545,GO:0042734,GO:0031623,GO:0042802,GO:…	clathrin-dependent endocytosis|modulation of age-related behavioral decline|early endosome|neurofibrillary tangle|Golgi apparatus|plasma membrane|positive regulation of neuron death|regulation of vesicle size|clathrin-coated pit|regulation of amyloid-beta formation|positive regulation of amyloid-beta formation|membrane bending|endocytosis|negative regulation of gene expression|receptor-mediated e…			rno-Picalm_0033	http://159.226.67.237:8080/new/circ_detail.php?ID=rno-Picalm_0033
circRNA_0296|Chr1:154439745_154447475_+	7731	560	sense-overlapping	XM_006229671.3	Chr1:154377229_154458966_+	Picalm	GeneID:89816,Genbank:XM_006229671.3,RGD:621054	phosphatidylinositol binding clathrin assembly protein, transcript variant X3	GO:0072583,GO:0090647,GO:0005769,GO:0097418,GO:0005794,GO:0005886,GO:1901216,GO:0097494,GO:0005905,GO:1902003,GO:1902004,GO:0097753,GO:0006897,GO:0010629,GO:0006898,GO:1902803,GO:0007409,GO:1902959,GO:0014069,GO:2000809,GO:0016050,GO:1902961,GO:0016188,GO:0030132,GO:0030136,GO:0016192,GO:0016197,GO:0030276,GO:0000149,GO:0035615,GO:0005515,GO:0031224,GO:0005545,GO:0042734,GO:0031623,GO:0042802,GO:…	clathrin-dependent endocytosis|modulation of age-related behavioral decline|early endosome|neurofibrillary tangle|Golgi apparatus|plasma membrane|positive regulation of neuron death|regulation of vesicle size|clathrin-coated pit|regulation of amyloid-beta formation|positive regulation of amyloid-beta formation|membrane bending|endocytosis|negative regulation of gene expression|receptor-mediated e…			rno-Picalm_0001	http://159.226.67.237:8080/new/circ_detail.php?ID=rno-Picalm_0001	RNO_CIRCpedia_5113	ENSRNOT00000092945.1	Picalm
circRNA_0297|Chr1:157422218_157440238_-	18021	878	sense-overlapping	XM_017588945.1	Chr1:157419117_157461584_-	Ankrd42	GeneID:293117,Genbank:XM_017588945.1,RGD:1310789	ankyrin repeat domain 42, transcript variant X1	GO:0051092,GO:1900017,GO:0005634,GO:0051059,GO:0051091	positive regulation of NF-kappaB transcription factor activity|positive regulation of cytokine production involved in inflammatory response|nucleus|NF-kappaB binding|positive regulation of DNA binding transcription factor activity			rno-Ankrd42_0005	http://159.226.67.237:8080/new/circ_detail.php?ID=rno-Ankrd42_0005	RNO_CIRCpedia_1767	NM_001135013	Ankrd42
circRNA_0298|Chr1:157468625_157490006_-	21382	4871	sense-overlapping	XM_008759657.2	Chr1:157463014_157494134_-	Pcf11	GeneID:361605,Genbank:XM_008759657.2,RGD:1563397	PCF11 cleavage and polyadenylation factor subunit, transcript variant X1	GO:0005575,GO:0005654,GO:0005737,GO:0005739,GO:0005849,GO:0006369,GO:0006378,GO:0006379,GO:0008150,GO:0000993,GO:0003674,GO:0003729	cellular_component|nucleoplasm|cytoplasm|mitochondrion|mRNA cleavage factor complex|termination of RNA polymerase II transcription|mRNA polyadenylation|mRNA cleavage|biological_process|RNA polymerase II core binding|molecular_function|mRNA binding	rno03015	mRNA surveillance pathway	rno-Pcf11_0001	http://159.226.67.237:8080/new/circ_detail.php?ID=rno-Pcf11_0001
circRNA_0299|Chr1:157470071_157490006_-	19936	4641	sense-overlapping	XM_008759657.2	Chr1:157463014_157494134_-	Pcf11	GeneID:361605,Genbank:XM_008759657.2,RGD:1563397	PCF11 cleavage and polyadenylation factor subunit, transcript variant X1	GO:0005575,GO:0005654,GO:0005737,GO:0005739,GO:0005849,GO:0006369,GO:0006378,GO:0006379,GO:0008150,GO:0000993,GO:0003674,GO:0003729	cellular_component|nucleoplasm|cytoplasm|mitochondrion|mRNA cleavage factor complex|termination of RNA polymerase II transcription|mRNA polyadenylation|mRNA cleavage|biological_process|RNA polymerase II core binding|molecular_function|mRNA binding	rno03015	mRNA surveillance pathway	rno-Pcf11_0006	http://159.226.67.237:8080/new/circ_detail.php?ID=rno-Pcf11_0006	RNO_CIRCpedia_1772	ENSRNOT00000013552.7	Pcf11
circRNA_0300|Chr1:161928871_161932898_+	4028	372	sense-overlapping	XM_017588948.1	Chr1:161922132_162035817_+	Nars2	GeneID:293128,Genbank:XM_017588948.1,RGD:1305145	asparaginyl-tRNA synthetase 2 (mitochondrial)(putative), transcript variant X1	GO:0005524,GO:0005654,GO:0005739,GO:0005829,GO:0006418,GO:0006421,GO:0003676,GO:0004812,GO:0004816	ATP binding|nucleoplasm|mitochondrion|cytosol|tRNA aminoacylation for protein translation|asparaginyl-tRNA aminoacylation|nucleic acid binding|aminoacyl-tRNA ligase activity|asparagine-tRNA ligase activity	rno00970	Aminoacyl-tRNA biosynthesis	rno-Nars2_0002	http://159.226.67.237:8080/new/circ_detail.php?ID=rno-Nars2_0002	RNO_CIRCpedia_1777	ENSRNOT00000078300.1	Nars2
circRNA_0301|Chr1:161988635_162006381_+	17747	472	sense-overlapping	NM_001034921.1	Chr1:161922193_162006950_+	Nars2	GeneID:293128,Genbank:NM_001034921.1,RGD:1305145	asparaginyl-tRNA synthetase 2 (mitochondrial)(putative)	GO:0005524,GO:0005654,GO:0005739,GO:0005829,GO:0006418,GO:0006421,GO:0003676,GO:0004812,GO:0004816	ATP binding|nucleoplasm|mitochondrion|cytosol|tRNA aminoacylation for protein translation|asparaginyl-tRNA aminoacylation|nucleic acid binding|aminoacyl-tRNA ligase activity|asparagine-tRNA ligase activity	rno00970	Aminoacyl-tRNA biosynthesis	rno-Nars2_0001	http://159.226.67.237:8080/new/circ_detail.php?ID=rno-Nars2_0001	RNO_CIRCpedia_1778	ENSRNOT00000078300.1	Nars2
circRNA_0302|Chr1:162451867_162454337_+	2471	313	sense-overlapping	NM_001191629.1	Chr1:162447692_162511350_+	Ints4	GeneID:308837,Genbank:NM_001191629.1,RGD:1305036	integrator complex subunit 4	GO:0032039,GO:0005634,GO:0016180	integrator complex|nucleus|snRNA processing			rno-Ints4_0009	http://159.226.67.237:8080/new/circ_detail.php?ID=rno-Ints4_0009	RNO_CIRCpedia_7570	ENSRNOT00000016770.6	Ints4
circRNA_0303|Chr1:162498952_162503301_+	4350	576	sense-overlapping	NM_001191629.1	Chr1:162447692_162511350_+	Ints4	GeneID:308837,Genbank:NM_001191629.1,RGD:1305036	integrator complex subunit 4	GO:0032039,GO:0005634,GO:0016180	integrator complex|nucleus|snRNA processing			rno-Ints4_0010	http://159.226.67.237:8080/new/circ_detail.php?ID=rno-Ints4_0010
circRNA_0304|Chr1:162639900_162643789_+	3890	1982	sense-overlapping	XM_218939.9	Chr1:162549222_162671962_+	Rsf1	GeneID:308839,Genbank:XM_218939.9,RGD:1311245	remodeling and spacing factor 1, transcript variant X2	GO:0006334,GO:0006338,GO:0006352,GO:0016584,GO:0016887,GO:0031213,GO:0042393,GO:0043392,GO:0045892,GO:0045893,GO:0046872,GO:0005634,GO:0050434,GO:0005654	nucleosome assembly|chromatin remodeling|DNA-templated transcription, initiation|nucleosome positioning|ATPase activity|RSF complex|histone binding|negative regulation of DNA binding|negative regulation of transcription, DNA-templated|positive regulation of transcription, DNA-templated|metal ion binding|nucleus|positive regulation of viral transcription|nucleoplasm			rno-Rsf1_0012	http://159.226.67.237:8080/new/circ_detail.php?ID=rno-Rsf1_0012	RNO_CIRCpedia_1779	ENSRNOT00000037050.5	Rsf1
circRNA_0305|Chr1:162684057_162691242_+	7186	518	sense-overlapping	XM_006229792.2	Chr1:162676246_162696549_+	Clns1a	GeneID:65160,Genbank:XM_006229792.2,RGD:61884	chloride nucleotide-sensitive channel 1A, transcript variant X1	GO:0034715,GO:0006884,GO:0005229,GO:0045794,GO:0005267,GO:0046982,GO:0016020,GO:0005634,GO:0005654,GO:0005829,GO:0032991,GO:0071805,GO:0034709,GO:1902476,GO:0005856,GO:1990935,GO:0005886,GO:0000387,GO:0006821	pICln-Sm protein complex|cell volume homeostasis|intracellular calcium activated chloride channel activity|negative regulation of cell volume|potassium channel activity|protein heterodimerization activity|membrane|nucleus|nucleoplasm|cytosol|protein-containing complex|potassium ion transmembrane transport|methylosome|chloride transmembrane transport|cytoskeleton|splicing factor binding|plasma mem…	rno03013	RNA transport	rno-Clns1a_0001	http://159.226.67.237:8080/new/circ_detail.php?ID=rno-Clns1a_0001	RNO_CIRCpedia_1782	ENSRNOT00000017702.6	Clns1a
circRNA_0306|Chr1:162684057_162696070_+	12014	770	sense-overlapping	XM_006229792.2	Chr1:162676246_162696549_+	Clns1a	GeneID:65160,Genbank:XM_006229792.2,RGD:61884	chloride nucleotide-sensitive channel 1A, transcript variant X1	GO:0034715,GO:0006884,GO:0005229,GO:0045794,GO:0005267,GO:0046982,GO:0016020,GO:0005634,GO:0005654,GO:0005829,GO:0032991,GO:0071805,GO:0034709,GO:1902476,GO:0005856,GO:1990935,GO:0005886,GO:0000387,GO:0006821	pICln-Sm protein complex|cell volume homeostasis|intracellular calcium activated chloride channel activity|negative regulation of cell volume|potassium channel activity|protein heterodimerization activity|membrane|nucleus|nucleoplasm|cytosol|protein-containing complex|potassium ion transmembrane transport|methylosome|chloride transmembrane transport|cytoskeleton|splicing factor binding|plasma mem…	rno03013	RNA transport	rno-Clns1a_0002	http://159.226.67.237:8080/new/circ_detail.php?ID=rno-Clns1a_0002
circRNA_0307|Chr1:162688794_162693133_+	4340	474	sense-overlapping	XM_006229792.2	Chr1:162676246_162696549_+	Clns1a	GeneID:65160,Genbank:XM_006229792.2,RGD:61884	chloride nucleotide-sensitive channel 1A, transcript variant X1	GO:0034715,GO:0006884,GO:0005229,GO:0045794,GO:0005267,GO:0046982,GO:0016020,GO:0005634,GO:0005654,GO:0005829,GO:0032991,GO:0071805,GO:0034709,GO:1902476,GO:0005856,GO:1990935,GO:0005886,GO:0000387,GO:0006821	pICln-Sm protein complex|cell volume homeostasis|intracellular calcium activated chloride channel activity|negative regulation of cell volume|potassium channel activity|protein heterodimerization activity|membrane|nucleus|nucleoplasm|cytosol|protein-containing complex|potassium ion transmembrane transport|methylosome|chloride transmembrane transport|cytoskeleton|splicing factor binding|plasma mem…	rno03013	RNA transport	rno-Clns1a_0004	http://159.226.67.237:8080/new/circ_detail.php?ID=rno-Clns1a_0004
circRNA_0308|Chr1:162688794_162696070_+	7277	633	sense-overlapping	XM_006229792.2	Chr1:162676246_162696549_+	Clns1a	GeneID:65160,Genbank:XM_006229792.2,RGD:61884	chloride nucleotide-sensitive channel 1A, transcript variant X1	GO:0034715,GO:0006884,GO:0005229,GO:0045794,GO:0005267,GO:0046982,GO:0016020,GO:0005634,GO:0005654,GO:0005829,GO:0032991,GO:0071805,GO:0034709,GO:1902476,GO:0005856,GO:1990935,GO:0005886,GO:0000387,GO:0006821	pICln-Sm protein complex|cell volume homeostasis|intracellular calcium activated chloride channel activity|negative regulation of cell volume|potassium channel activity|protein heterodimerization activity|membrane|nucleus|nucleoplasm|cytosol|protein-containing complex|potassium ion transmembrane transport|methylosome|chloride transmembrane transport|cytoskeleton|splicing factor binding|plasma mem…	rno03013	RNA transport	rno-Clns1a_0003	http://159.226.67.237:8080/new/circ_detail.php?ID=rno-Clns1a_0003
circRNA_0309|Chr1:162830920_162843974_+	13055	501	sense-overlapping	NM_017198.1	Chr1:162768156_162882685_+	Pak1	GeneID:29431,Genbank:NM_017198.1,RGD:3250	p21 (RAC1) activated kinase 1	GO:0061535,GO:0071407,GO:0071437,GO:0004672,GO:0090314,GO:0098597,GO:0098793,GO:0004674,GO:1900271,GO:1904707,GO:1904754,GO:0004709,GO:0005911,GO:0005515,GO:0005518,GO:0005925,GO:0006468,GO:0006887,GO:0016477,GO:0006915,GO:0019901,GO:0007264,GO:0021549,GO:0007266,GO:0021764,GO:0023014,GO:0030010,GO:0030018,GO:0000165,GO:0031965,GO:0030027,GO:0000186,GO:0032147,GO:0030036,GO:0000910,GO:0032587,GO:…	glutamate secretion, neurotransmission|cellular response to organic cyclic compound|invadopodium|protein kinase activity|positive regulation of protein targeting to membrane|observational learning|presynapse|protein serine/threonine kinase activity|regulation of long-term synaptic potentiation|positive regulation of vascular smooth muscle cell proliferation|positive regulation of vascular associa…	rno04014,rno04010,rno04012,rno04392,rno04024,rno04510,rno04810,rno04625,rno04650,rno04660,rno04666,rno04062,rno04360,rno05205,rno05211	Ras signaling pathway|MAPK signaling pathway|ErbB signaling pathway|Hippo signaling pathway - multiple species|cAMP signaling pathway|Focal adhesion|Regulation of actin cytoskeleton|C-type lectin receptor signaling pathway|Natural killer cell mediated cytotoxicity|T cell receptor signaling pathway|Fc gamma R-mediated phagocytosis|Chemokine signaling pathway|Axon guidance|Proteoglycans in cancer|R…	rno-Pak1_0001	http://159.226.67.237:8080/new/circ_detail.php?ID=rno-Pak1_0001
circRNA_0310|Chr1:163182618_163216364_-	33747	394	sense-overlapping	XM_008759809.2	Chr1:163160987_163263621_-	Acer3	GeneID:499210,Genbank:XM_008759809.2,RGD:1561254	alkaline ceramidase 3, transcript variant X1	GO:0008150,GO:0008284,GO:0030173,GO:0030176,GO:0046512,GO:0070774,GO:0071602,GO:0003674,GO:0005575,GO:0006672	biological_process|positive regulation of cell proliferation|integral component of Golgi membrane|integral component of endoplasmic reticulum membrane|sphingosine biosynthetic process|phytoceramidase activity|phytosphingosine biosynthetic process|molecular_function|cellular_component|ceramide metabolic process	rno00600	Sphingolipid metabolism	rno-Acer3_0004	http://159.226.67.237:8080/new/circ_detail.php?ID=rno-Acer3_0004	RNO_CIRCpedia_5120	ENSRNOT00000019987.7	Acer3
circRNA_0311|Chr1:163203870_163216364_-	12495	335	sense-overlapping	XM_008759809.2	Chr1:163160987_163263621_-	Acer3	GeneID:499210,Genbank:XM_008759809.2,RGD:1561254	alkaline ceramidase 3, transcript variant X1	GO:0008150,GO:0008284,GO:0030173,GO:0030176,GO:0046512,GO:0070774,GO:0071602,GO:0003674,GO:0005575,GO:0006672	biological_process|positive regulation of cell proliferation|integral component of Golgi membrane|integral component of endoplasmic reticulum membrane|sphingosine biosynthetic process|phytoceramidase activity|phytosphingosine biosynthetic process|molecular_function|cellular_component|ceramide metabolic process	rno00600	Sphingolipid metabolism	rno-Acer3_0001	http://159.226.67.237:8080/new/circ_detail.php?ID=rno-Acer3_0001
circRNA_0312|Chr1:163564635_163578540_-	13906	831	sense-overlapping	XM_006229811.3	Chr1:163541071_163618575_-	Emsy	GeneID:361607,Genbank:XM_006229811.3,RGD:1310712	EMSY BRCA2-interacting transcriptional repressor, transcript variant X9	GO:0042803,GO:0005654,GO:0006355	protein homodimerization activity|nucleoplasm|regulation of transcription, DNA-templated
circRNA_0313|Chr1:163594856_163604876_-	10021	806	sense-overlapping	XM_006229811.3	Chr1:163541071_163618575_-	Emsy	GeneID:361607,Genbank:XM_006229811.3,RGD:1310712	EMSY BRCA2-interacting transcriptional repressor, transcript variant X9	GO:0042803,GO:0005654,GO:0006355	protein homodimerization activity|nucleoplasm|regulation of transcription, DNA-templated			rno-Emsy_0001	http://159.226.67.237:8080/new/circ_detail.php?ID=rno-Emsy_0001	RNO_CIRCpedia_1783	ENSRNOT00000043788.6	Emsy
circRNA_0314|Chr1:163938955_163976846_-	37892	633	sense-overlapping	XM_006229763.2	Chr1:163844804_164101566_-	Uvrag	GeneID:308846,Genbank:XM_006229763.2,RGD:1589754	UV radiation resistance associated gene, transcript variant X1	GO:0045335,GO:0007098,GO:0003674,GO:0046718,GO:0008150,GO:0005575,GO:0051684,GO:0017124,GO:0005764,GO:0060627,GO:0005768,GO:0005769,GO:0005770,GO:0005783,GO:0030496,GO:0005813,GO:0070418,GO:0032465,GO:0006281,GO:0071900,GO:0032801,GO:0006890,GO:0097680,GO:0032991,GO:0006914,GO:0000149,GO:0035493,GO:0007051,GO:0007059,GO:0000323	phagocytic vesicle|centrosome cycle|molecular_function|viral entry into host cell|biological_process|cellular_component|maintenance of Golgi location|SH3 domain binding|lysosome|regulation of vesicle-mediated transport|endosome|early endosome|late endosome|endoplasmic reticulum|midbody|centrosome|DNA-dependent protein kinase complex|regulation of cytokinesis|DNA repair|regulation of protein serin…	rno04140	Autophagy - animal	rno-Uvrag_0001	http://159.226.67.237:8080/new/circ_detail.php?ID=rno-Uvrag_0001	RNO_CIRCpedia_5122	ENSRNOT00000022176.7	Uvrag
circRNA_0315|Chr1:163965001_163976846_-	11846	233	sense-overlapping	XM_006229763.2	Chr1:163844804_164101566_-	Uvrag	GeneID:308846,Genbank:XM_006229763.2,RGD:1589754	UV radiation resistance associated gene, transcript variant X1	GO:0045335,GO:0007098,GO:0003674,GO:0046718,GO:0008150,GO:0005575,GO:0051684,GO:0017124,GO:0005764,GO:0060627,GO:0005768,GO:0005769,GO:0005770,GO:0005783,GO:0030496,GO:0005813,GO:0070418,GO:0032465,GO:0006281,GO:0071900,GO:0032801,GO:0006890,GO:0097680,GO:0032991,GO:0006914,GO:0000149,GO:0035493,GO:0007051,GO:0007059,GO:0000323	phagocytic vesicle|centrosome cycle|molecular_function|viral entry into host cell|biological_process|cellular_component|maintenance of Golgi location|SH3 domain binding|lysosome|regulation of vesicle-mediated transport|endosome|early endosome|late endosome|endoplasmic reticulum|midbody|centrosome|DNA-dependent protein kinase complex|regulation of cytokinesis|DNA repair|regulation of protein serin…	rno04140	Autophagy - animal	rno-Uvrag_0004	http://159.226.67.237:8080/new/circ_detail.php?ID=rno-Uvrag_0004	RNO_CIRCpedia_1784	ENSRNOT00000022176.7	Uvrag
circRNA_0316|Chr1:163965001_164064815_-	99815	588	sense-overlapping	XM_006229763.2	Chr1:163844804_164101566_-	Uvrag	GeneID:308846,Genbank:XM_006229763.2,RGD:1589754	UV radiation resistance associated gene, transcript variant X1	GO:0045335,GO:0007098,GO:0003674,GO:0046718,GO:0008150,GO:0005575,GO:0051684,GO:0017124,GO:0005764,GO:0060627,GO:0005768,GO:0005769,GO:0005770,GO:0005783,GO:0030496,GO:0005813,GO:0070418,GO:0032465,GO:0006281,GO:0071900,GO:0032801,GO:0006890,GO:0097680,GO:0032991,GO:0006914,GO:0000149,GO:0035493,GO:0007051,GO:0007059,GO:0000323	phagocytic vesicle|centrosome cycle|molecular_function|viral entry into host cell|biological_process|cellular_component|maintenance of Golgi location|SH3 domain binding|lysosome|regulation of vesicle-mediated transport|endosome|early endosome|late endosome|endoplasmic reticulum|midbody|centrosome|DNA-dependent protein kinase complex|regulation of cytokinesis|DNA repair|regulation of protein serin…	rno04140	Autophagy - animal	rno-Uvrag_0022	http://159.226.67.237:8080/new/circ_detail.php?ID=rno-Uvrag_0022
circRNA_0317|Chr1:164025518_164055455_-	29938	320	sense-overlapping	XM_006229763.2	Chr1:163844804_164101566_-	Uvrag	GeneID:308846,Genbank:XM_006229763.2,RGD:1589754	UV radiation resistance associated gene, transcript variant X1	GO:0045335,GO:0007098,GO:0003674,GO:0046718,GO:0008150,GO:0005575,GO:0051684,GO:0017124,GO:0005764,GO:0060627,GO:0005768,GO:0005769,GO:0005770,GO:0005783,GO:0030496,GO:0005813,GO:0070418,GO:0032465,GO:0006281,GO:0071900,GO:0032801,GO:0006890,GO:0097680,GO:0032991,GO:0006914,GO:0000149,GO:0035493,GO:0007051,GO:0007059,GO:0000323	phagocytic vesicle|centrosome cycle|molecular_function|viral entry into host cell|biological_process|cellular_component|maintenance of Golgi location|SH3 domain binding|lysosome|regulation of vesicle-mediated transport|endosome|early endosome|late endosome|endoplasmic reticulum|midbody|centrosome|DNA-dependent protein kinase complex|regulation of cytokinesis|DNA repair|regulation of protein serin…	rno04140	Autophagy - animal	rno-Uvrag_0005	http://159.226.67.237:8080/new/circ_detail.php?ID=rno-Uvrag_0005	RNO_CIRCpedia_1785	ENSRNOT00000022176.7	Uvrag
circRNA_0318|Chr1:164025518_164064815_-	39298	355	sense-overlapping	XM_006229763.2	Chr1:163844804_164101566_-	Uvrag	GeneID:308846,Genbank:XM_006229763.2,RGD:1589754	UV radiation resistance associated gene, transcript variant X1	GO:0045335,GO:0007098,GO:0003674,GO:0046718,GO:0008150,GO:0005575,GO:0051684,GO:0017124,GO:0005764,GO:0060627,GO:0005768,GO:0005769,GO:0005770,GO:0005783,GO:0030496,GO:0005813,GO:0070418,GO:0032465,GO:0006281,GO:0071900,GO:0032801,GO:0006890,GO:0097680,GO:0032991,GO:0006914,GO:0000149,GO:0035493,GO:0007051,GO:0007059,GO:0000323	phagocytic vesicle|centrosome cycle|molecular_function|viral entry into host cell|biological_process|cellular_component|maintenance of Golgi location|SH3 domain binding|lysosome|regulation of vesicle-mediated transport|endosome|early endosome|late endosome|endoplasmic reticulum|midbody|centrosome|DNA-dependent protein kinase complex|regulation of cytokinesis|DNA repair|regulation of protein serin…	rno04140	Autophagy - animal	rno-Uvrag_0002	http://159.226.67.237:8080/new/circ_detail.php?ID=rno-Uvrag_0002
circRNA_0319|Chr1:164046102_164055455_-	9354	237	sense-overlapping	XM_006229763.2	Chr1:163844804_164101566_-	Uvrag	GeneID:308846,Genbank:XM_006229763.2,RGD:1589754	UV radiation resistance associated gene, transcript variant X1	GO:0045335,GO:0007098,GO:0003674,GO:0046718,GO:0008150,GO:0005575,GO:0051684,GO:0017124,GO:0005764,GO:0060627,GO:0005768,GO:0005769,GO:0005770,GO:0005783,GO:0030496,GO:0005813,GO:0070418,GO:0032465,GO:0006281,GO:0071900,GO:0032801,GO:0006890,GO:0097680,GO:0032991,GO:0006914,GO:0000149,GO:0035493,GO:0007051,GO:0007059,GO:0000323	phagocytic vesicle|centrosome cycle|molecular_function|viral entry into host cell|biological_process|cellular_component|maintenance of Golgi location|SH3 domain binding|lysosome|regulation of vesicle-mediated transport|endosome|early endosome|late endosome|endoplasmic reticulum|midbody|centrosome|DNA-dependent protein kinase complex|regulation of cytokinesis|DNA repair|regulation of protein serin…	rno04140	Autophagy - animal	rno-Uvrag_0018	http://159.226.67.237:8080/new/circ_detail.php?ID=rno-Uvrag_0018
circRNA_0320|Chr1:164046102_164064815_-	18714	272	sense-overlapping	XM_006229763.2	Chr1:163844804_164101566_-	Uvrag	GeneID:308846,Genbank:XM_006229763.2,RGD:1589754	UV radiation resistance associated gene, transcript variant X1	GO:0045335,GO:0007098,GO:0003674,GO:0046718,GO:0008150,GO:0005575,GO:0051684,GO:0017124,GO:0005764,GO:0060627,GO:0005768,GO:0005769,GO:0005770,GO:0005783,GO:0030496,GO:0005813,GO:0070418,GO:0032465,GO:0006281,GO:0071900,GO:0032801,GO:0006890,GO:0097680,GO:0032991,GO:0006914,GO:0000149,GO:0035493,GO:0007051,GO:0007059,GO:0000323	phagocytic vesicle|centrosome cycle|molecular_function|viral entry into host cell|biological_process|cellular_component|maintenance of Golgi location|SH3 domain binding|lysosome|regulation of vesicle-mediated transport|endosome|early endosome|late endosome|endoplasmic reticulum|midbody|centrosome|DNA-dependent protein kinase complex|regulation of cytokinesis|DNA repair|regulation of protein serin…	rno04140	Autophagy - animal	rno-Uvrag_0003	http://159.226.67.237:8080/new/circ_detail.php?ID=rno-Uvrag_0003
circRNA_0321|Chr1:164055294_164064815_-	9522	197	sense-overlapping	XM_006229763.2	Chr1:163844804_164101566_-	Uvrag	GeneID:308846,Genbank:XM_006229763.2,RGD:1589754	UV radiation resistance associated gene, transcript variant X1	GO:0045335,GO:0007098,GO:0003674,GO:0046718,GO:0008150,GO:0005575,GO:0051684,GO:0017124,GO:0005764,GO:0060627,GO:0005768,GO:0005769,GO:0005770,GO:0005783,GO:0030496,GO:0005813,GO:0070418,GO:0032465,GO:0006281,GO:0071900,GO:0032801,GO:0006890,GO:0097680,GO:0032991,GO:0006914,GO:0000149,GO:0035493,GO:0007051,GO:0007059,GO:0000323	phagocytic vesicle|centrosome cycle|molecular_function|viral entry into host cell|biological_process|cellular_component|maintenance of Golgi location|SH3 domain binding|lysosome|regulation of vesicle-mediated transport|endosome|early endosome|late endosome|endoplasmic reticulum|midbody|centrosome|DNA-dependent protein kinase complex|regulation of cytokinesis|DNA repair|regulation of protein serin…	rno04140	Autophagy - animal	rno-Uvrag_0016	http://159.226.67.237:8080/new/circ_detail.php?ID=rno-Uvrag_0016
circRNA_0322|Chr1:164561999_164565992_+	3994	317	sense-overlapping	XM_006229740.3	Chr1:164502099_164573947_+	Arrb1	GeneID:25387,Genbank:XM_006229740.3,RGD:2156	arrestin, beta 1, transcript variant X7	GO:0004402,GO:0005096,GO:0005102,GO:0005159,GO:0005515,GO:0005622,GO:0005634,GO:0006897,GO:0006915,GO:0005654,GO:0007186,GO:0005737,GO:0007188,GO:0007602,GO:0008134,GO:0008277,GO:0031397,GO:0031398,GO:0031410,GO:0008284,GO:0031434,GO:0031625,GO:0031691,GO:0031692,GO:0000187,GO:0035615,GO:0031701,GO:0000785,GO:0035774,GO:0031762,GO:0001933,GO:0042493,GO:0031896,GO:0001934,GO:0042699,GO:0042981,GO:…	histone acetyltransferase activity|GTPase activator activity|signaling receptor binding|insulin-like growth factor receptor binding|protein binding|intracellular|nucleus|endocytosis|apoptotic process|nucleoplasm|G-protein coupled receptor signaling pathway|cytoplasm|adenylate cyclase-modulating G-protein coupled receptor signaling pathway|phototransduction|transcription factor binding|regulation …	rno04010,rno04340,rno04144,rno04062,rno04926,rno04740,rno05032	MAPK signaling pathway|Hedgehog signaling pathway|Endocytosis|Chemokine signaling pathway|Relaxin signaling pathway|Olfactory transduction|Morphine addiction	rno-Arrb1_0001	http://159.226.67.237:8080/new/circ_detail.php?ID=rno-Arrb1_0001
circRNA_0323|Chr1:164647412_164656574_-	9163	962	sense-overlapping	XM_006229723.3	Chr1:164623313_164661301_-	Slco2b1	GeneID:140860,Genbank:XM_006229723.3,RGD:621391	solute carrier organic anion transporter family, member 2b1, transcript variant X3	GO:0055085,GO:0005887,GO:0071718,GO:0006811,GO:0008514,GO:0015125,GO:0015347,GO:0015721,GO:0016021,GO:0001889,GO:0016324,GO:0005215,GO:0043252,GO:0005886	transmembrane transport|integral component of plasma membrane|sodium-independent icosanoid transport|ion transport|organic anion transmembrane transporter activity|bile acid transmembrane transporter activity|sodium-independent organic anion transmembrane transporter activity|bile acid and bile salt transport|integral component of membrane|liver development|apical plasma membrane|transporter acti…			rno-Slco2b1_0001	http://159.226.67.237:8080/new/circ_detail.php?ID=rno-Slco2b1_0001
circRNA_0324|Chr1:164931730_164947123_-	15394	340	sense-overlapping	XM_017590193.1	Chr1:164917069_164977164_-	Rnf169	GeneID:685009,Genbank:XM_017590193.1,RGD:1583288	ring finger protein 169, transcript variant X2	GO:0016607,GO:0031491,GO:0035861,GO:0070530,GO:2000780,GO:0005634,GO:0005654,GO:0006974	nuclear speck|nucleosome binding|site of double-strand break|K63-linked polyubiquitin modification-dependent protein binding|negative regulation of double-strand break repair|nucleus|nucleoplasm|cellular response to DNA damage stimulus			rno-Rnf169_0001	http://159.226.67.237:8080/new/circ_detail.php?ID=rno-Rnf169_0001	RNO_CIRCpedia_1787	ENSRNOT00000029629.4	Rnf169
circRNA_0325|Chr1:164931730_164958663_-	26934	11880	sense-overlapping	XM_017590193.1	Chr1:164917069_164977164_-	Rnf169	GeneID:685009,Genbank:XM_017590193.1,RGD:1583288	ring finger protein 169, transcript variant X2	GO:0016607,GO:0031491,GO:0035861,GO:0070530,GO:2000780,GO:0005634,GO:0005654,GO:0006974	nuclear speck|nucleosome binding|site of double-strand break|K63-linked polyubiquitin modification-dependent protein binding|negative regulation of double-strand break repair|nucleus|nucleoplasm|cellular response to DNA damage stimulus			rno-Rnf169_0002	http://159.226.67.237:8080/new/circ_detail.php?ID=rno-Rnf169_0002
circRNA_0326|Chr1:164945808_164947123_-	1316	1316	sense-overlapping	XM_017590193.1	Chr1:164917069_164977164_-	Rnf169	GeneID:685009,Genbank:XM_017590193.1,RGD:1583288	ring finger protein 169, transcript variant X2	GO:0016607,GO:0031491,GO:0035861,GO:0070530,GO:2000780,GO:0005634,GO:0005654,GO:0006974	nuclear speck|nucleosome binding|site of double-strand break|K63-linked polyubiquitin modification-dependent protein binding|negative regulation of double-strand break repair|nucleus|nucleoplasm|cellular response to DNA damage stimulus			rno-Rnf169_0003	http://159.226.67.237:8080/new/circ_detail.php?ID=rno-Rnf169_0003
circRNA_0327|Chr1:165366392_165367044_-	653	187	sense-overlapping	NM_001191838.1	Chr1:165335242_165382216_-	Ppme1	GeneID:361613,Genbank:NM_001191838.1,RGD:1309683	protein phosphatase methylesterase 1	GO:0019888,GO:0019901,GO:0019903,GO:0043666,GO:0045296,GO:0051721,GO:0051722,GO:0051723,GO:0002028,GO:0006482	protein phosphatase regulator activity|protein kinase binding|protein phosphatase binding|regulation of phosphoprotein phosphatase activity|cadherin binding|protein phosphatase 2A binding|protein C-terminal methylesterase activity|protein methylesterase activity|regulation of sodium ion transport|protein demethylation			rno-Ppme1_0001	http://159.226.67.237:8080/new/circ_detail.php?ID=rno-Ppme1_0001	RNO_CIRCpedia_6543	NM_001191838	Ppme1
circRNA_0328|Chr1:165414771_165415667_+	897	281	sense-overlapping	XM_017588953.1	Chr1:165382279_165463751_+	C2cd3	GeneID:293148,Genbank:XM_017588953.1,RGD:1307366	C2 calcium-dependent domain containing 3, transcript variant X5	GO:0061511,GO:0005814,GO:0071539,GO:0007389,GO:1905515,GO:0007420,GO:0008589,GO:0016485,GO:0021915,GO:0021997,GO:0030162,GO:0030326,GO:0034451,GO:0036064,GO:0001701,GO:0042733,GO:0001947,GO:0060271,GO:0005813	centriole elongation|centriole|protein localization to centrosome|pattern specification process|non-motile cilium assembly|brain development|regulation of smoothened signaling pathway|protein processing|neural tube development|neural plate axis specification|regulation of proteolysis|embryonic limb morphogenesis|centriolar satellite|ciliary basal body|in utero embryonic development|embryonic digi…			rno-C2cd3_0003	http://159.226.67.237:8080/new/circ_detail.php?ID=rno-C2cd3_0003	RNO_CIRCpedia_1789	NM_001191602	C2cd3
circRNA_0329|Chr1:165512525_165512691_-	167	167	antisense	NM_019354.3	Chr1:165506375_165512744_+	Ucp2	GeneID:54315,Genbank:NM_019354.3,RGD:3932	uncoupling protein 2	GO:0071333,GO:0017077,GO:0003674,GO:0097421,GO:0022857,GO:0005737,GO:1902600,GO:0032869,GO:0005739,GO:1990542,GO:0005743,GO:0006839,GO:0032870,GO:0007565,GO:1990845,GO:0034198,GO:0007568,GO:0043066,GO:0009409,GO:0051881,GO:0009749,GO:0000303,GO:0061179,GO:0010942,GO:0001666,GO:0070542,GO:0016021	cellular response to glucose stimulus|oxidative phosphorylation uncoupler activity|molecular_function|liver regeneration|transmembrane transporter activity|cytoplasm|proton transmembrane transport|cellular response to insulin stimulus|mitochondrion|mitochondrial transmembrane transport|mitochondrial inner membrane|mitochondrial transport|cellular response to hormone stimulus|female pregnancy|adap…
circRNA_0330|Chr1:165588317_165597908_-	9592	177	sense-overlapping	NM_001106282.1	Chr1:165563788_165606375_-	Mrpl48	GeneID:293149,Genbank:NM_001106282.1,RGD:1307576	mitochondrial ribosomal protein L48	GO:0005761,GO:0005762	mitochondrial ribosome|mitochondrial large ribosomal subunit			rno-Mrpl48_0001	http://159.226.67.237:8080/new/circ_detail.php?ID=rno-Mrpl48_0001
circRNA_0331|Chr1:165646261_165654319_+	8059	425	sense-overlapping	XM_006229794.2	Chr1:165624973_165664068_+	Rab6a	GeneID:84379,Genbank:XM_006229794.2,RGD:619737	RAB6A, member RAS oncogene family, transcript variant X1	GO:0005525,GO:0005794,GO:0018125,GO:0019882,GO:0019904,GO:0005802,GO:0031410,GO:0031489,GO:0032482,GO:0032781,GO:0034067,GO:0000139,GO:0001671,GO:0003924,GO:0005829,GO:0006886,GO:0006890,GO:0006891,GO:0012505,GO:0034498,GO:0015031,GO:0042147,GO:0016020,GO:0048193,GO:0051117,GO:0070381	GTP binding|Golgi apparatus|peptidyl-cysteine methylation|antigen processing and presentation|protein domain specific binding|trans-Golgi network|cytoplasmic vesicle|myosin V binding|Rab protein signal transduction|positive regulation of ATPase activity|protein localization to Golgi apparatus|Golgi membrane|ATPase activator activity|GTPase activity|cytosol|intracellular protein transport|retrogra…			rno-Rab6a_0001	http://159.226.67.237:8080/new/circ_detail.php?ID=rno-Rab6a_0001	RNO_CIRCpedia_1790	ENSRNOT00000025104.6	Rab6a
circRNA_0332|Chr1:166208849_166259335_+	50487	684	sense-overlapping	XM_017589187.1	Chr1:166140025_166395726_+	Fchsd2	GeneID:308864,Genbank:XM_017589187.1,RGD:1304812	FCH and double SH3 domains 2, transcript variant X4	GO:0055037,GO:0007274,GO:0030833,GO:0031594	recycling endosome|neuromuscular synaptic transmission|regulation of actin filament polymerization|neuromuscular junction			rno-Fchsd2_0014	http://159.226.67.237:8080/new/circ_detail.php?ID=rno-Fchsd2_0014
circRNA_0333|Chr1:166231693_166259335_+	27643	540	sense-overlapping	XM_017589187.1	Chr1:166140025_166395726_+	Fchsd2	GeneID:308864,Genbank:XM_017589187.1,RGD:1304812	FCH and double SH3 domains 2, transcript variant X4	GO:0055037,GO:0007274,GO:0030833,GO:0031594	recycling endosome|neuromuscular synaptic transmission|regulation of actin filament polymerization|neuromuscular junction			rno-Fchsd2_0001	http://159.226.67.237:8080/new/circ_detail.php?ID=rno-Fchsd2_0001	RNO_CIRCpedia_9453	ENSRNOT00000091822.1	Fchsd2
circRNA_0334|Chr1:166351174_166368428_+	17255	384	sense-overlapping	XM_017589187.1	Chr1:166140025_166395726_+	Fchsd2	GeneID:308864,Genbank:XM_017589187.1,RGD:1304812	FCH and double SH3 domains 2, transcript variant X4	GO:0055037,GO:0007274,GO:0030833,GO:0031594	recycling endosome|neuromuscular synaptic transmission|regulation of actin filament polymerization|neuromuscular junction			rno-Fchsd2_0010	http://159.226.67.237:8080/new/circ_detail.php?ID=rno-Fchsd2_0010	RNO_CIRCpedia_1792	ENSRNOT00000091822.1	Fchsd2
circRNA_0335|Chr1:166351174_166378796_+	27623	519	sense-overlapping	XM_017589187.1	Chr1:166140025_166395726_+	Fchsd2	GeneID:308864,Genbank:XM_017589187.1,RGD:1304812	FCH and double SH3 domains 2, transcript variant X4	GO:0055037,GO:0007274,GO:0030833,GO:0031594	recycling endosome|neuromuscular synaptic transmission|regulation of actin filament polymerization|neuromuscular junction			rno-Fchsd2_0002	http://159.226.67.237:8080/new/circ_detail.php?ID=rno-Fchsd2_0002	RNO_CIRCpedia_1793	ENSRNOT00000091822.1	Fchsd2
circRNA_0336|Chr1:166378662_166385907_+	7246	831	sense-overlapping	XM_017589187.1	Chr1:166140025_166395726_+	Fchsd2	GeneID:308864,Genbank:XM_017589187.1,RGD:1304812	FCH and double SH3 domains 2, transcript variant X4	GO:0055037,GO:0007274,GO:0030833,GO:0031594	recycling endosome|neuromuscular synaptic transmission|regulation of actin filament polymerization|neuromuscular junction			rno-Fchsd2_0011	http://159.226.67.237:8080/new/circ_detail.php?ID=rno-Fchsd2_0011
circRNA_0337|Chr1:166595442_166609825_+	14384	345	sense-overlapping	NM_001143847.1	Chr1:166534643_166626147_+	Pde2a	GeneID:81743,Genbank:NM_001143847.1,RGD:620965	phosphodiesterase 2A, transcript variant 1	GO:0071320,GO:0071321,GO:0004118,GO:0071560,GO:0097011,GO:0005515,GO:0005634,GO:0097457,GO:1904613,GO:0005794,GO:0005737,GO:0005829,GO:0005886,GO:0010821,GO:0019933,GO:0019934,GO:0030224,GO:0000122,GO:0033159,GO:0030424,GO:0035690,GO:0030425,GO:0030552,GO:0003170,GO:0003279,GO:0035904,GO:0003281,GO:0036004,GO:0004112,GO:0036006,GO:0043951,GO:0004114,GO:0045121,GO:0042734,GO:0046069,GO:0046872,GO:…	cellular response to cAMP|cellular response to cGMP|cGMP-stimulated cyclic-nucleotide phosphodiesterase activity|cellular response to transforming growth factor beta stimulus|cellular response to granulocyte macrophage colony-stimulating factor stimulus|protein binding|nucleus|hippocampal mossy fiber|cellular response to 2,3,7,8-tetrachlorodibenzodioxine|Golgi apparatus|cytoplasm|cytosol|plasma m…	rno00230,rno04022,rno04925,rno04740,rno05032	Purine metabolism|cGMP - PKG signaling pathway|Aldosterone synthesis and secretion|Olfactory transduction|Morphine addiction
circRNA_0338|Chr1:167111033_167119075_-	8043	384	sense-overlapping	XM_006229879.3	Chr1:167095916_167165255_-	Rnf121	GeneID:308871,Genbank:XM_006229879.3,RGD:1307857	ring finger protein 121, transcript variant X2	GO:0016567,GO:0030433,GO:0030968,GO:0061630,GO:0000139,GO:0005789,GO:0016021	protein ubiquitination|ubiquitin-dependent ERAD pathway|endoplasmic reticulum unfolded protein response|ubiquitin protein ligase activity|Golgi membrane|endoplasmic reticulum membrane|integral component of membrane			rno-Rnf121_0001	http://159.226.67.237:8080/new/circ_detail.php?ID=rno-Rnf121_0001
circRNA_0339|Chr1:167260358_167276543_-	16186	556	sense-overlapping	XM_006229892.3	Chr1:167213866_167308680_-	Nup98	GeneID:81738,Genbank:XM_006229892.3,RGD:71033	nucleoporin 98, transcript variant X1	GO:0005643,GO:0005654,GO:0006260,GO:0017056,GO:0006366,GO:0031080,GO:0006405,GO:0006508,GO:0031965,GO:0034398,GO:0051028,GO:0034399,GO:0051292,GO:1990841,GO:0000776,GO:0000973,GO:0001105,GO:0003723,GO:0003729,GO:0005515,GO:0005634,GO:0005635,GO:0006606,GO:0006913,GO:0008139,GO:0008236,GO:0016604,GO:0042277,GO:0042405,GO:0043231,GO:0044614,GO:0044615,GO:0045944,GO:0048026	nuclear pore|nucleoplasm|DNA replication|structural constituent of nuclear pore|transcription by RNA polymerase II|nuclear pore outer ring|RNA export from nucleus|proteolysis|nuclear membrane|telomere tethering at nuclear periphery|mRNA transport|nuclear periphery|nuclear pore complex assembly|promoter-specific chromatin binding|kinetochore|posttranscriptional tethering of RNA polymerase II gene …	rno03013,rno05164	RNA transport|Influenza A	rno-Nup98_0001	http://159.226.67.237:8080/new/circ_detail.php?ID=rno-Nup98_0001
circRNA_0340|Chr1:167289654_167293396_-	3743	523	sense-overlapping	XM_006229892.3	Chr1:167213866_167308680_-	Nup98	GeneID:81738,Genbank:XM_006229892.3,RGD:71033	nucleoporin 98, transcript variant X1	GO:0005643,GO:0005654,GO:0006260,GO:0017056,GO:0006366,GO:0031080,GO:0006405,GO:0006508,GO:0031965,GO:0034398,GO:0051028,GO:0034399,GO:0051292,GO:1990841,GO:0000776,GO:0000973,GO:0001105,GO:0003723,GO:0003729,GO:0005515,GO:0005634,GO:0005635,GO:0006606,GO:0006913,GO:0008139,GO:0008236,GO:0016604,GO:0042277,GO:0042405,GO:0043231,GO:0044614,GO:0044615,GO:0045944,GO:0048026	nuclear pore|nucleoplasm|DNA replication|structural constituent of nuclear pore|transcription by RNA polymerase II|nuclear pore outer ring|RNA export from nucleus|proteolysis|nuclear membrane|telomere tethering at nuclear periphery|mRNA transport|nuclear periphery|nuclear pore complex assembly|promoter-specific chromatin binding|kinetochore|posttranscriptional tethering of RNA polymerase II gene …	rno03013,rno05164	RNA transport|Influenza A
circRNA_0341|Chr1:167506836_167514018_+	7183	406	sense-overlapping	NM_001108496.2	Chr1:167373894_167533412_+	Stim1	GeneID:361618,Genbank:NM_001108496.2,RGD:1306831	stromal interaction molecule 1	GO:0005246,GO:0005509,GO:0005513,GO:0005783,GO:0030176,GO:0030426,GO:0005874,GO:0032237,GO:0070588,GO:2001256,GO:0032541,GO:0032991,GO:0002020,GO:0002115,GO:0005886,GO:0005887,GO:0006812,GO:0006874,GO:0033017,GO:0014902,GO:0015279,GO:0042802,GO:0045766,GO:0051010,GO:0051924,GO:0070166	calcium channel regulator activity|calcium ion binding|detection of calcium ion|endoplasmic reticulum|integral component of endoplasmic reticulum membrane|growth cone|microtubule|activation of store-operated calcium channel activity|calcium ion transmembrane transport|regulation of store-operated calcium entry|cortical endoplasmic reticulum|protein-containing complex|protease binding|store-operat…	rno04020,rno04611	Calcium signaling pathway|Platelet activation	rno-Stim1_0002	http://159.226.67.237:8080/new/circ_detail.php?ID=rno-Stim1_0002
circRNA_0342|Chr1:168958579_168964665_+	6087	5972	sense-overlapping	NM_001111269.1	Chr1:168964202_168965568_+	LOC689064	GeneID:689064,Genbank:NM_001111269.1,RGD:1597422	beta-globin	GO:0015671,GO:0019825,GO:0020037,GO:0005344,GO:0005506,GO:0005833	oxygen transport|oxygen binding|heme binding|oxygen carrier activity|iron ion binding|hemoglobin complex
circRNA_0343|Chr1:169524500_169526378_-	1879	148	sense-overlapping	XM_006229917.3	Chr1:169521655_169540238_-	Trim30	GeneID:499223,Genbank:XM_006229917.3,RGD:1563970	tripartite motif-containing 30, transcript variant X1					rno-Trim5_0001	http://159.226.67.237:8080/new/circ_detail.php?ID=rno-Trim5_0001
circRNA_0344|Chr1:169534353_169534828_-	476	476	exonic	XM_006229917.3	Chr1:169521655_169540238_-	Trim30	GeneID:499223,Genbank:XM_006229917.3,RGD:1563970	tripartite motif-containing 30, transcript variant X1
circRNA_0345|Chr1:170450030_170450980_-	951	565	sense-overlapping	NM_031786.1	Chr1:170441662_170464341_-	Trim3	GeneID:83616,Genbank:NM_031786.1,RGD:70074	tripartite motif-containing 3	GO:0005737,GO:0005769,GO:0005794,GO:0008270,GO:0015031,GO:0016567,GO:0030425,GO:0061630,GO:0004842,GO:0005515	cytoplasm|early endosome|Golgi apparatus|zinc ion binding|protein transport|protein ubiquitination|dendrite|ubiquitin protein ligase activity|ubiquitin-protein transferase activity|protein binding
circRNA_0346|Chr1:174165890_174174250_-	8361	1388	sense-overlapping	XM_008759737.2	Chr1:174137124_174189094_-	St5	GeneID:308944,Genbank:XM_008759737.2,RGD:1308995	suppression of tumorigenicity 5, transcript variant X1	GO:0017112,GO:0070374	Rab guanyl-nucleotide exchange factor activity|positive regulation of ERK1 and ERK2 cascade			rno-St5_0001	http://159.226.67.237:8080/new/circ_detail.php?ID=rno-St5_0001
circRNA_0347|Chr1:174540211_174556451_-	16241	1487	sense-overlapping	NM_001107546.2	Chr1:174524047_174588529_-	Dennd5a	GeneID:308942,Genbank:NM_001107546.2,RGD:1306759	DENN domain containing 5A	GO:0005802,GO:0005829,GO:0010977,GO:0016020,GO:0017112,GO:0017137,GO:0030904,GO:0042147,GO:0050982,GO:0070588,GO:0000139,GO:0005262,GO:0005794	trans-Golgi network|cytosol|negative regulation of neuron projection development|membrane|Rab guanyl-nucleotide exchange factor activity|Rab GTPase binding|retromer complex|retrograde transport, endosome to Golgi|detection of mechanical stimulus|calcium ion transmembrane transport|Golgi membrane|calcium channel activity|Golgi apparatus					RNO_CIRCpedia_6545	ENSRNOT00000017485.6	Dennd5a
circRNA_0348|Chr1:174609600_174613577_-	3978	467	sense-overlapping	NM_001012358.1	Chr1:174605833_174620064_-	Tmem41b	GeneID:361626,Genbank:NM_001012358.1,RGD:1310870	transmembrane protein 41B	GO:0007399,GO:0016021	nervous system development|integral component of membrane			rno-Tmem41b_0001	http://159.226.67.237:8080/new/circ_detail.php?ID=rno-Tmem41b_0001	RNO_CIRCpedia_1801	NM_001012358	Tmem41b
circRNA_0349|Chr1:174666652_174668450_+	1799	313	sense-overlapping	NM_001107545.1	Chr1:174655939_174696173_+	Ipo7	GeneID:308939,Genbank:NM_001107545.1,RGD:1310849	importin 7	GO:0005829,GO:0006606,GO:0007165,GO:0008536,GO:0008565,GO:0042393,GO:0045087,GO:0046332,GO:0005635,GO:0005654	cytosol|protein import into nucleus|signal transduction|Ran GTPase binding|protein transporter activity|histone binding|innate immune response|SMAD binding|nuclear envelope|nucleoplasm			rno-Ipo7_0004	http://159.226.67.237:8080/new/circ_detail.php?ID=rno-Ipo7_0004	RNO_CIRCpedia_7574	NM_001107545	Ipo7
circRNA_0350|Chr1:174770215_174778064_+	7850	889	sense-overlapping	XM_006229974.3	Chr1:174765228_174790882_+	Wee1	GeneID:308937,Genbank:XM_006229974.3,RGD:1307895	WEE1 G2 checkpoint kinase, transcript variant X1	GO:0004672,GO:0004715,GO:0005524,GO:0005730,GO:0005737,GO:0006468,GO:0018108,GO:0030010,GO:0048812,GO:0051301,GO:0000226,GO:0000278,GO:0000287	protein kinase activity|non-membrane spanning protein tyrosine kinase activity|ATP binding|nucleolus|cytoplasm|protein phosphorylation|peptidyl-tyrosine phosphorylation|establishment of cell polarity|neuron projection morphogenesis|cell division|microtubule cytoskeleton organization|mitotic cell cycle|magnesium ion binding	rno04110	Cell cycle
circRNA_0351|Chr1:174772242_174776864_+	4623	365	sense-overlapping	XM_006229974.3	Chr1:174765228_174790882_+	Wee1	GeneID:308937,Genbank:XM_006229974.3,RGD:1307895	WEE1 G2 checkpoint kinase, transcript variant X1	GO:0004672,GO:0004715,GO:0005524,GO:0005730,GO:0005737,GO:0006468,GO:0018108,GO:0030010,GO:0048812,GO:0051301,GO:0000226,GO:0000278,GO:0000287	protein kinase activity|non-membrane spanning protein tyrosine kinase activity|ATP binding|nucleolus|cytoplasm|protein phosphorylation|peptidyl-tyrosine phosphorylation|establishment of cell polarity|neuron projection morphogenesis|cell division|microtubule cytoskeleton organization|mitotic cell cycle|magnesium ion binding	rno04110	Cell cycle	rno-Wee1_0006	http://159.226.67.237:8080/new/circ_detail.php?ID=rno-Wee1_0006
circRNA_0352|Chr1:174970502_174971441_-	940	288	sense-overlapping	XM_008759803.2	Chr1:174948361_175364128_-	Sbf2	GeneID:691042,Genbank:XM_008759803.2,RGD:1588657	SET binding factor 2, transcript variant X6	GO:0019208,GO:0019902,GO:0035091,GO:0042803,GO:0043087,GO:0051262,GO:0005774,GO:0016020,GO:0017112	phosphatase regulator activity|phosphatase binding|phosphatidylinositol binding|protein homodimerization activity|regulation of GTPase activity|protein tetramerization|vacuolar membrane|membrane|Rab guanyl-nucleotide exchange factor activity			rno-Sbf2_0017	http://159.226.67.237:8080/new/circ_detail.php?ID=rno-Sbf2_0017
circRNA_0353|Chr1:175005900_175011736_-	5837	646	sense-overlapping	XM_008759803.2	Chr1:174948361_175364128_-	Sbf2	GeneID:691042,Genbank:XM_008759803.2,RGD:1588657	SET binding factor 2, transcript variant X6	GO:0019208,GO:0019902,GO:0035091,GO:0042803,GO:0043087,GO:0051262,GO:0005774,GO:0016020,GO:0017112	phosphatase regulator activity|phosphatase binding|phosphatidylinositol binding|protein homodimerization activity|regulation of GTPase activity|protein tetramerization|vacuolar membrane|membrane|Rab guanyl-nucleotide exchange factor activity			rno-Sbf2_0010	http://159.226.67.237:8080/new/circ_detail.php?ID=rno-Sbf2_0010
circRNA_0354|Chr1:175005900_175019571_-	13672	1324	sense-overlapping	XM_008759803.2	Chr1:174948361_175364128_-	Sbf2	GeneID:691042,Genbank:XM_008759803.2,RGD:1588657	SET binding factor 2, transcript variant X6	GO:0019208,GO:0019902,GO:0035091,GO:0042803,GO:0043087,GO:0051262,GO:0005774,GO:0016020,GO:0017112	phosphatase regulator activity|phosphatase binding|phosphatidylinositol binding|protein homodimerization activity|regulation of GTPase activity|protein tetramerization|vacuolar membrane|membrane|Rab guanyl-nucleotide exchange factor activity
circRNA_0355|Chr1:175171303_175202232_-	30930	329	sense-overlapping	XM_008759803.2	Chr1:174948361_175364128_-	Sbf2	GeneID:691042,Genbank:XM_008759803.2,RGD:1588657	SET binding factor 2, transcript variant X6	GO:0019208,GO:0019902,GO:0035091,GO:0042803,GO:0043087,GO:0051262,GO:0005774,GO:0016020,GO:0017112	phosphatase regulator activity|phosphatase binding|phosphatidylinositol binding|protein homodimerization activity|regulation of GTPase activity|protein tetramerization|vacuolar membrane|membrane|Rab guanyl-nucleotide exchange factor activity			rno-Sbf2_0024	http://159.226.67.237:8080/new/circ_detail.php?ID=rno-Sbf2_0024
circRNA_0356|Chr1:175171303_175218889_-	47587	954	sense-overlapping	XM_008759803.2	Chr1:174948361_175364128_-	Sbf2	GeneID:691042,Genbank:XM_008759803.2,RGD:1588657	SET binding factor 2, transcript variant X6	GO:0019208,GO:0019902,GO:0035091,GO:0042803,GO:0043087,GO:0051262,GO:0005774,GO:0016020,GO:0017112	phosphatase regulator activity|phosphatase binding|phosphatidylinositol binding|protein homodimerization activity|regulation of GTPase activity|protein tetramerization|vacuolar membrane|membrane|Rab guanyl-nucleotide exchange factor activity			rno-Sbf2_0016	http://159.226.67.237:8080/new/circ_detail.php?ID=rno-Sbf2_0016
circRNA_0357|Chr1:175200414_175218889_-	18476	885	sense-overlapping	XM_008759803.2	Chr1:174948361_175364128_-	Sbf2	GeneID:691042,Genbank:XM_008759803.2,RGD:1588657	SET binding factor 2, transcript variant X6	GO:0019208,GO:0019902,GO:0035091,GO:0042803,GO:0043087,GO:0051262,GO:0005774,GO:0016020,GO:0017112	phosphatase regulator activity|phosphatase binding|phosphatidylinositol binding|protein homodimerization activity|regulation of GTPase activity|protein tetramerization|vacuolar membrane|membrane|Rab guanyl-nucleotide exchange factor activity			rno-Sbf2_0008	http://159.226.67.237:8080/new/circ_detail.php?ID=rno-Sbf2_0008	RNO_CIRCpedia_1806	NM_001134970	Sbf2
circRNA_0358|Chr1:175208193_175284224_-	76032	1562	sense-overlapping	XM_008759803.2	Chr1:174948361_175364128_-	Sbf2	GeneID:691042,Genbank:XM_008759803.2,RGD:1588657	SET binding factor 2, transcript variant X6	GO:0019208,GO:0019902,GO:0035091,GO:0042803,GO:0043087,GO:0051262,GO:0005774,GO:0016020,GO:0017112	phosphatase regulator activity|phosphatase binding|phosphatidylinositol binding|protein homodimerization activity|regulation of GTPase activity|protein tetramerization|vacuolar membrane|membrane|Rab guanyl-nucleotide exchange factor activity			rno-Sbf2_0011	http://159.226.67.237:8080/new/circ_detail.php?ID=rno-Sbf2_0011
circRNA_0359|Chr1:175225210_175230218_-	5009	356	sense-overlapping	XM_008759803.2	Chr1:174948361_175364128_-	Sbf2	GeneID:691042,Genbank:XM_008759803.2,RGD:1588657	SET binding factor 2, transcript variant X6	GO:0019208,GO:0019902,GO:0035091,GO:0042803,GO:0043087,GO:0051262,GO:0005774,GO:0016020,GO:0017112	phosphatase regulator activity|phosphatase binding|phosphatidylinositol binding|protein homodimerization activity|regulation of GTPase activity|protein tetramerization|vacuolar membrane|membrane|Rab guanyl-nucleotide exchange factor activity			rno-Sbf2_0003	http://159.226.67.237:8080/new/circ_detail.php?ID=rno-Sbf2_0003
circRNA_0360|Chr1:175225210_175284224_-	59015	937	sense-overlapping	XM_008759803.2	Chr1:174948361_175364128_-	Sbf2	GeneID:691042,Genbank:XM_008759803.2,RGD:1588657	SET binding factor 2, transcript variant X6	GO:0019208,GO:0019902,GO:0035091,GO:0042803,GO:0043087,GO:0051262,GO:0005774,GO:0016020,GO:0017112	phosphatase regulator activity|phosphatase binding|phosphatidylinositol binding|protein homodimerization activity|regulation of GTPase activity|protein tetramerization|vacuolar membrane|membrane|Rab guanyl-nucleotide exchange factor activity			rno-Sbf2_0022	http://159.226.67.237:8080/new/circ_detail.php?ID=rno-Sbf2_0022
circRNA_0361|Chr1:175252582_175284224_-	31643	581	sense-overlapping	XM_008759803.2	Chr1:174948361_175364128_-	Sbf2	GeneID:691042,Genbank:XM_008759803.2,RGD:1588657	SET binding factor 2, transcript variant X6	GO:0019208,GO:0019902,GO:0035091,GO:0042803,GO:0043087,GO:0051262,GO:0005774,GO:0016020,GO:0017112	phosphatase regulator activity|phosphatase binding|phosphatidylinositol binding|protein homodimerization activity|regulation of GTPase activity|protein tetramerization|vacuolar membrane|membrane|Rab guanyl-nucleotide exchange factor activity			rno-Sbf2_0023	http://159.226.67.237:8080/new/circ_detail.php?ID=rno-Sbf2_0023
circRNA_0362|Chr1:175646900_175650721_-	3822	301	sense-overlapping	XM_006230050.3	Chr1:175631656_175657414_-	rnf141	GeneID:308900,Genbank:XM_006230050.3,RGD:1303154	ring finger protein 141, transcript variant X1	GO:0006355,GO:0016020,GO:0046872,GO:0051865,GO:0003677,GO:0004842	regulation of transcription, DNA-templated|membrane|metal ion binding|protein autoubiquitination|DNA binding|ubiquitin-protein transferase activity			rno-rnf141_0001	http://159.226.67.237:8080/new/circ_detail.php?ID=rno-rnf141_0001
circRNA_0363|Chr1:175714102_175714982_-	881	273	sense-overlapping	NM_001105211.1	Chr1:175681960_175762294_-	Mrvi1	GeneID:308899,Genbank:NM_001105211.1,RGD:1309828	murine retrovirus integration site 1 homolog, transcript variant 1	GO:0045986,GO:0060087,GO:0005622,GO:0016021,GO:0019934	negative regulation of smooth muscle contraction|relaxation of vascular smooth muscle|intracellular|integral component of membrane|cGMP-mediated signaling	rno04022,rno04270	cGMP - PKG signaling pathway|Vascular smooth muscle contraction	rno-Mrvi1_0001	http://159.226.67.237:8080/new/circ_detail.php?ID=rno-Mrvi1_0001	RNO_CIRCpedia_1809	NM_001105211	Mrvi1
circRNA_0364|Chr1:176334639_176340157_-	5519	234	sense-overlapping	NM_001079884.1	Chr1:176296186_176607466_-	Galnt18	GeneID:293181,Genbank:NM_001079884.1,RGD:1309623	polypeptide N-acetylgalactosaminyltransferase 18	GO:0005794,GO:0006493,GO:0009312,GO:0016020,GO:0016021,GO:0016266,GO:0018242,GO:0018243,GO:0030246,GO:0000139,GO:0004653	Golgi apparatus|protein O-linked glycosylation|oligosaccharide biosynthetic process|membrane|integral component of membrane|O-glycan processing|protein O-linked glycosylation via serine|protein O-linked glycosylation via threonine|carbohydrate binding|Golgi membrane|polypeptide N-acetylgalactosaminyltransferase activity	rno00512	Mucin type O-glycan biosynthesis	rno-Galnt18_0009	http://159.226.67.237:8080/new/circ_detail.php?ID=rno-Galnt18_0009	RNO_CIRCpedia_1810	NM_001079884	Galnt18
circRNA_0365|Chr1:176334639_176346651_-	12013	420	sense-overlapping	NM_001079884.1	Chr1:176296186_176607466_-	Galnt18	GeneID:293181,Genbank:NM_001079884.1,RGD:1309623	polypeptide N-acetylgalactosaminyltransferase 18	GO:0005794,GO:0006493,GO:0009312,GO:0016020,GO:0016021,GO:0016266,GO:0018242,GO:0018243,GO:0030246,GO:0000139,GO:0004653	Golgi apparatus|protein O-linked glycosylation|oligosaccharide biosynthetic process|membrane|integral component of membrane|O-glycan processing|protein O-linked glycosylation via serine|protein O-linked glycosylation via threonine|carbohydrate binding|Golgi membrane|polypeptide N-acetylgalactosaminyltransferase activity	rno00512	Mucin type O-glycan biosynthesis	rno-Galnt18_0003	http://159.226.67.237:8080/new/circ_detail.php?ID=rno-Galnt18_0003	RNO_CIRCpedia_1811	NM_001079884	Galnt18
circRNA_0366|Chr1:176374378_176382073_-	7696	497	sense-overlapping	NM_001079884.1	Chr1:176296186_176607466_-	Galnt18	GeneID:293181,Genbank:NM_001079884.1,RGD:1309623	polypeptide N-acetylgalactosaminyltransferase 18	GO:0005794,GO:0006493,GO:0009312,GO:0016020,GO:0016021,GO:0016266,GO:0018242,GO:0018243,GO:0030246,GO:0000139,GO:0004653	Golgi apparatus|protein O-linked glycosylation|oligosaccharide biosynthetic process|membrane|integral component of membrane|O-glycan processing|protein O-linked glycosylation via serine|protein O-linked glycosylation via threonine|carbohydrate binding|Golgi membrane|polypeptide N-acetylgalactosaminyltransferase activity	rno00512	Mucin type O-glycan biosynthesis	rno-Galnt18_0002	http://159.226.67.237:8080/new/circ_detail.php?ID=rno-Galnt18_0002	RNO_CIRCpedia_1812	NM_001079884	Galnt18
circRNA_0367|Chr1:177129021_177130995_+	1975	258	sense-overlapping	XM_006230065.3	Chr1:177048607_177173729_+	Mical2	GeneID:365352,Genbank:XM_006230065.3,RGD:1311773	microtubule associated monooxygenase, calponin and LIM domain containing 2, transcript variant X7	GO:0030042,GO:0005634,GO:0043914,GO:0007010,GO:0007507,GO:0010735,GO:0046872,GO:0016491,GO:0055114,GO:0016709,GO:0071949,GO:0001947,GO:0019417,GO:0003779	actin filament depolymerization|nucleus|NADPH:sulfur oxidoreductase activity|cytoskeleton organization|heart development|positive regulation of transcription via serum response element binding|metal ion binding|oxidoreductase activity|oxidation-reduction process|oxidoreductase activity, acting on paired donors, with incorporation or reduction of molecular oxygen, NAD(P)H as one donor, and incorpo…			rno-Mical2_0006	http://159.226.67.237:8080/new/circ_detail.php?ID=rno-Mical2_0006	RNO_CIRCpedia_9461	ENSRNOT00000081595.1	Mical2
circRNA_0368|Chr1:177360220_177364974_+	4755	264	sense-overlapping	NM_020656.2	Chr1:177249302_177405143_+	Parva	GeneID:57341,Genbank:NM_020656.2,RGD:71021	parvin, alpha	GO:0005634,GO:0005737,GO:0005829,GO:0005856,GO:0015629,GO:0005886,GO:0005925,GO:0019904,GO:0030018,GO:0030027,GO:0030031,GO:0051291,GO:0030036,GO:0060271,GO:0031532,GO:0070252,GO:0002040,GO:0071670,GO:0003148,GO:0003779,GO:0007155,GO:0007163,GO:0032991,GO:0034113,GO:0008360,GO:0034446,GO:0045296	nucleus|cytoplasm|cytosol|cytoskeleton|actin cytoskeleton|plasma membrane|focal adhesion|protein domain specific binding|Z disc|lamellipodium|cell projection assembly|protein heterooligomerization|actin cytoskeleton organization|cilium assembly|actin cytoskeleton reorganization|actin-mediated cell contraction|sprouting angiogenesis|smooth muscle cell chemotaxis|outflow tract septum morphogenesis|…	rno04510	Focal adhesion	rno-Parva_0001	http://159.226.67.237:8080/new/circ_detail.php?ID=rno-Parva_0001
circRNA_0369|Chr1:177360220_177377649_+	17430	405	sense-overlapping	NM_020656.2	Chr1:177249302_177405143_+	Parva	GeneID:57341,Genbank:NM_020656.2,RGD:71021	parvin, alpha	GO:0005634,GO:0005737,GO:0005829,GO:0005856,GO:0015629,GO:0005886,GO:0005925,GO:0019904,GO:0030018,GO:0030027,GO:0030031,GO:0051291,GO:0030036,GO:0060271,GO:0031532,GO:0070252,GO:0002040,GO:0071670,GO:0003148,GO:0003779,GO:0007155,GO:0007163,GO:0032991,GO:0034113,GO:0008360,GO:0034446,GO:0045296	nucleus|cytoplasm|cytosol|cytoskeleton|actin cytoskeleton|plasma membrane|focal adhesion|protein domain specific binding|Z disc|lamellipodium|cell projection assembly|protein heterooligomerization|actin cytoskeleton organization|cilium assembly|actin cytoskeleton reorganization|actin-mediated cell contraction|sprouting angiogenesis|smooth muscle cell chemotaxis|outflow tract septum morphogenesis|…	rno04510	Focal adhesion	rno-Parva_0003	http://159.226.67.237:8080/new/circ_detail.php?ID=rno-Parva_0003
circRNA_0370|Chr1:177389638_177397572_+	7935	385	sense-overlapping	NM_020656.2	Chr1:177249302_177405143_+	Parva	GeneID:57341,Genbank:NM_020656.2,RGD:71021	parvin, alpha	GO:0005634,GO:0005737,GO:0005829,GO:0005856,GO:0015629,GO:0005886,GO:0005925,GO:0019904,GO:0030018,GO:0030027,GO:0030031,GO:0051291,GO:0030036,GO:0060271,GO:0031532,GO:0070252,GO:0002040,GO:0071670,GO:0003148,GO:0003779,GO:0007155,GO:0007163,GO:0032991,GO:0034113,GO:0008360,GO:0034446,GO:0045296	nucleus|cytoplasm|cytosol|cytoskeleton|actin cytoskeleton|plasma membrane|focal adhesion|protein domain specific binding|Z disc|lamellipodium|cell projection assembly|protein heterooligomerization|actin cytoskeleton organization|cilium assembly|actin cytoskeleton reorganization|actin-mediated cell contraction|sprouting angiogenesis|smooth muscle cell chemotaxis|outflow tract septum morphogenesis|…	rno04510	Focal adhesion	rno-Parva_0002	http://159.226.67.237:8080/new/circ_detail.php?ID=rno-Parva_0002
circRNA_0371|Chr1:177391988_177397572_+	5585	326	sense-overlapping	NM_020656.2	Chr1:177249302_177405143_+	Parva	GeneID:57341,Genbank:NM_020656.2,RGD:71021	parvin, alpha	GO:0005634,GO:0005737,GO:0005829,GO:0005856,GO:0015629,GO:0005886,GO:0005925,GO:0019904,GO:0030018,GO:0030027,GO:0030031,GO:0051291,GO:0030036,GO:0060271,GO:0031532,GO:0070252,GO:0002040,GO:0071670,GO:0003148,GO:0003779,GO:0007155,GO:0007163,GO:0032991,GO:0034113,GO:0008360,GO:0034446,GO:0045296	nucleus|cytoplasm|cytosol|cytoskeleton|actin cytoskeleton|plasma membrane|focal adhesion|protein domain specific binding|Z disc|lamellipodium|cell projection assembly|protein heterooligomerization|actin cytoskeleton organization|cilium assembly|actin cytoskeleton reorganization|actin-mediated cell contraction|sprouting angiogenesis|smooth muscle cell chemotaxis|outflow tract septum morphogenesis|…	rno04510	Focal adhesion	rno-Parva_0005	http://159.226.67.237:8080/new/circ_detail.php?ID=rno-Parva_0005
circRNA_0372|Chr1:177393806_177397572_+	3767	244	sense-overlapping	NM_020656.2	Chr1:177249302_177405143_+	Parva	GeneID:57341,Genbank:NM_020656.2,RGD:71021	parvin, alpha	GO:0005634,GO:0005737,GO:0005829,GO:0005856,GO:0015629,GO:0005886,GO:0005925,GO:0019904,GO:0030018,GO:0030027,GO:0030031,GO:0051291,GO:0030036,GO:0060271,GO:0031532,GO:0070252,GO:0002040,GO:0071670,GO:0003148,GO:0003779,GO:0007155,GO:0007163,GO:0032991,GO:0034113,GO:0008360,GO:0034446,GO:0045296	nucleus|cytoplasm|cytosol|cytoskeleton|actin cytoskeleton|plasma membrane|focal adhesion|protein domain specific binding|Z disc|lamellipodium|cell projection assembly|protein heterooligomerization|actin cytoskeleton organization|cilium assembly|actin cytoskeleton reorganization|actin-mediated cell contraction|sprouting angiogenesis|smooth muscle cell chemotaxis|outflow tract septum morphogenesis|…	rno04510	Focal adhesion
circRNA_0373|Chr1:177521072_177569872_+	48801	48801	sense-overlapping	XM_006230052.2	Chr1:177495500_177714795_+	Tead1	GeneID:361630,Genbank:XM_006230052.2,RGD:1549742	TEA domain transcription factor 1, transcript variant X1	GO:0003700,GO:0005634,GO:0005654,GO:0005667,GO:0045944,GO:0046982,GO:0006355,GO:0048339,GO:0006366,GO:0048368,GO:0048568,GO:0065003,GO:0071148,GO:0071300,GO:0071902,GO:1902459,GO:0000978,GO:0000982,GO:0000987,GO:0001077,GO:0001085,GO:0001134,GO:0001223,GO:0003143,GO:0003677,GO:0007507,GO:0014883,GO:0030903,GO:0035329,GO:0042127,GO:0043565,GO:1902895,GO:0044212,GO:0045893	DNA binding transcription factor activity|nucleus|nucleoplasm|transcription factor complex|positive regulation of transcription by RNA polymerase II|protein heterodimerization activity|regulation of transcription, DNA-templated|paraxial mesoderm development|transcription by RNA polymerase II|lateral mesoderm development|embryonic organ development|protein-containing complex assembly|TEAD-1-YAP co…	rno04390,rno04392	Hippo signaling pathway|Hippo signaling pathway - multiple species	rno-Tead1_0010	http://159.226.67.237:8080/new/circ_detail.php?ID=rno-Tead1_0010
circRNA_0374|Chr1:177569617_177569872_+	256	256	exonic	XM_006230052.2	Chr1:177495500_177714795_+	Tead1	GeneID:361630,Genbank:XM_006230052.2,RGD:1549742	TEA domain transcription factor 1, transcript variant X1	GO:0003700,GO:0005634,GO:0005654,GO:0005667,GO:0045944,GO:0046982,GO:0006355,GO:0048339,GO:0006366,GO:0048368,GO:0048568,GO:0065003,GO:0071148,GO:0071300,GO:0071902,GO:1902459,GO:0000978,GO:0000982,GO:0000987,GO:0001077,GO:0001085,GO:0001134,GO:0001223,GO:0003143,GO:0003677,GO:0007507,GO:0014883,GO:0030903,GO:0035329,GO:0042127,GO:0043565,GO:1902895,GO:0044212,GO:0045893	DNA binding transcription factor activity|nucleus|nucleoplasm|transcription factor complex|positive regulation of transcription by RNA polymerase II|protein heterodimerization activity|regulation of transcription, DNA-templated|paraxial mesoderm development|transcription by RNA polymerase II|lateral mesoderm development|embryonic organ development|protein-containing complex assembly|TEAD-1-YAP co…	rno04390,rno04392	Hippo signaling pathway|Hippo signaling pathway - multiple species	rno-Tead1_0005	http://159.226.67.237:8080/new/circ_detail.php?ID=rno-Tead1_0005	RNO_CIRCpedia_1817	ENSRNOT00000021020.4	Tead1
circRNA_0375|Chr1:177651557_177654228_+	2672	191	sense-overlapping	XM_006230052.2	Chr1:177495500_177714795_+	Tead1	GeneID:361630,Genbank:XM_006230052.2,RGD:1549742	TEA domain transcription factor 1, transcript variant X1	GO:0003700,GO:0005634,GO:0005654,GO:0005667,GO:0045944,GO:0046982,GO:0006355,GO:0048339,GO:0006366,GO:0048368,GO:0048568,GO:0065003,GO:0071148,GO:0071300,GO:0071902,GO:1902459,GO:0000978,GO:0000982,GO:0000987,GO:0001077,GO:0001085,GO:0001134,GO:0001223,GO:0003143,GO:0003677,GO:0007507,GO:0014883,GO:0030903,GO:0035329,GO:0042127,GO:0043565,GO:1902895,GO:0044212,GO:0045893	DNA binding transcription factor activity|nucleus|nucleoplasm|transcription factor complex|positive regulation of transcription by RNA polymerase II|protein heterodimerization activity|regulation of transcription, DNA-templated|paraxial mesoderm development|transcription by RNA polymerase II|lateral mesoderm development|embryonic organ development|protein-containing complex assembly|TEAD-1-YAP co…	rno04390,rno04392	Hippo signaling pathway|Hippo signaling pathway - multiple species	rno-Tead1_0006	http://159.226.67.237:8080/new/circ_detail.php?ID=rno-Tead1_0006
circRNA_0376|Chr1:178364154_178409492_+	45339	1539	sense-overlapping	XM_006230020.3	Chr1:178351674_178409668_+	Far1	GeneID:293173,Genbank:XM_006230020.3,RGD:1306647	fatty acyl CoA reductase 1, transcript variant X3	GO:0102965,GO:0035336,GO:0005779,GO:0043231,GO:0046474,GO:0006629,GO:0008611,GO:0010025,GO:0055114,GO:0080019,GO:0016021,GO:0005777	alcohol-forming fatty acyl-CoA reductase activity|long-chain fatty-acyl-CoA metabolic process|integral component of peroxisomal membrane|intracellular membrane-bounded organelle|glycerophospholipid biosynthetic process|lipid metabolic process|ether lipid biosynthetic process|wax biosynthetic process|oxidation-reduction process|fatty-acyl-CoA reductase (alcohol-forming) activity|integral component…	rno04146	Peroxisome	rno-Far1_0007	http://159.226.67.237:8080/new/circ_detail.php?ID=rno-Far1_0007
circRNA_0377|Chr1:178927608_178927790_+	183	183	exonic	XM_017589664.1	Chr1:178568777_178935715_+	Spon1	GeneID:64456,Genbank:XM_017589664.1,RGD:619918	spondin 1, transcript variant X1	GO:0007155,GO:0031012,GO:0046872,GO:0005578,GO:0005615	cell adhesion|extracellular matrix|metal ion binding|proteinaceous extracellular matrix|extracellular space			rno-Spon1_0003	http://159.226.67.237:8080/new/circ_detail.php?ID=rno-Spon1_0003
circRNA_0378|Chr1:178941217_178955232_-	14016	1184	sense-overlapping	NM_001013434.1	Chr1:178940515_179010257_-	Rras2	GeneID:365355,Genbank:NM_001013434.1,RGD:1310793	related RAS viral (r-ras) oncogene homolog 2	GO:0005575,GO:0005622,GO:0007265,GO:0008150,GO:0009987,GO:0030335,GO:1901214,GO:0003674,GO:0003924,GO:0005525	cellular_component|intracellular|Ras protein signal transduction|biological_process|cellular process|positive regulation of cell migration|regulation of neuron death|molecular_function|GTPase activity|GTP binding	rno04014,rno04010,rno04371,rno04072,rno04024,rno04140,rno04137,rno04218,rno04810,rno04625,rno05205,rno05166	Ras signaling pathway|MAPK signaling pathway|Apelin signaling pathway|Phospholipase D signaling pathway|cAMP signaling pathway|Autophagy - animal|Mitophagy - animal|Cellular senescence|Regulation of actin cytoskeleton|C-type lectin receptor signaling pathway|Proteoglycans in cancer|HTLV-I infection	rno-Rras2_0003	http://159.226.67.237:8080/new/circ_detail.php?ID=rno-Rras2_0003
circRNA_0379|Chr1:178953396_178955232_-	1837	300	sense-overlapping	NM_001013434.1	Chr1:178940515_179010257_-	Rras2	GeneID:365355,Genbank:NM_001013434.1,RGD:1310793	related RAS viral (r-ras) oncogene homolog 2	GO:0005575,GO:0005622,GO:0007265,GO:0008150,GO:0009987,GO:0030335,GO:1901214,GO:0003674,GO:0003924,GO:0005525	cellular_component|intracellular|Ras protein signal transduction|biological_process|cellular process|positive regulation of cell migration|regulation of neuron death|molecular_function|GTPase activity|GTP binding	rno04014,rno04010,rno04371,rno04072,rno04024,rno04140,rno04137,rno04218,rno04810,rno04625,rno05205,rno05166	Ras signaling pathway|MAPK signaling pathway|Apelin signaling pathway|Phospholipase D signaling pathway|cAMP signaling pathway|Autophagy - animal|Mitophagy - animal|Cellular senescence|Regulation of actin cytoskeleton|C-type lectin receptor signaling pathway|Proteoglycans in cancer|HTLV-I infection	rno-Rras2_0001	http://159.226.67.237:8080/new/circ_detail.php?ID=rno-Rras2_0001	RNO_CIRCpedia_7575	NM_001013434	Rras2
circRNA_0380|Chr1:184008119_184017761_+	9643	547	sense-overlapping	NM_017229.1	Chr1:183892841_184078071_+	Pde3b	GeneID:29516,Genbank:NM_017229.1,RGD:61943	phosphodiesterase 3B	GO:0050995,GO:0032045,GO:0016020,GO:0004115,GO:0032869,GO:0016021,GO:0051219,GO:0016101,GO:0004119,GO:0042593,GO:0005783,GO:0005794,GO:0006198,GO:0016525,GO:0043422,GO:0007162,GO:0046676,GO:0030552,GO:0001525,GO:0046872,GO:0031018,GO:0007165,GO:0004114,GO:0050796,GO:0008144	negative regulation of lipid catabolic process|guanyl-nucleotide exchange factor complex|membrane|3',5'-cyclic-AMP phosphodiesterase activity|cellular response to insulin stimulus|integral component of membrane|phosphoprotein binding|diterpenoid metabolic process|cGMP-inhibited cyclic-nucleotide phosphodiesterase activity|glucose homeostasis|endoplasmic reticulum|Golgi apparatus|cAMP catabolic pr…	rno00230,rno04371,rno04024,rno04022,rno04910,rno04922,rno04923,rno04914,rno04924,rno05032	Purine metabolism|Apelin signaling pathway|cAMP signaling pathway|cGMP - PKG signaling pathway|Insulin signaling pathway|Glucagon signaling pathway|Regulation of lipolysis in adipocyte|Progesterone-mediated oocyte maturation|Renin secretion|Morphine addiction	rno-Pde3b_0012	http://159.226.67.237:8080/new/circ_detail.php?ID=rno-Pde3b_0012	RNO_CIRCpedia_1821	ENSRNOT00000015498.4	Pde3b
circRNA_0381|Chr1:184008119_184042715_+	34597	832	sense-overlapping	NM_017229.1	Chr1:183892841_184078071_+	Pde3b	GeneID:29516,Genbank:NM_017229.1,RGD:61943	phosphodiesterase 3B	GO:0050995,GO:0032045,GO:0016020,GO:0004115,GO:0032869,GO:0016021,GO:0051219,GO:0016101,GO:0004119,GO:0042593,GO:0005783,GO:0005794,GO:0006198,GO:0016525,GO:0043422,GO:0007162,GO:0046676,GO:0030552,GO:0001525,GO:0046872,GO:0031018,GO:0007165,GO:0004114,GO:0050796,GO:0008144	negative regulation of lipid catabolic process|guanyl-nucleotide exchange factor complex|membrane|3',5'-cyclic-AMP phosphodiesterase activity|cellular response to insulin stimulus|integral component of membrane|phosphoprotein binding|diterpenoid metabolic process|cGMP-inhibited cyclic-nucleotide phosphodiesterase activity|glucose homeostasis|endoplasmic reticulum|Golgi apparatus|cAMP catabolic pr…	rno00230,rno04371,rno04024,rno04022,rno04910,rno04922,rno04923,rno04914,rno04924,rno05032	Purine metabolism|Apelin signaling pathway|cAMP signaling pathway|cGMP - PKG signaling pathway|Insulin signaling pathway|Glucagon signaling pathway|Regulation of lipolysis in adipocyte|Progesterone-mediated oocyte maturation|Renin secretion|Morphine addiction	rno-Pde3b_0003	http://159.226.67.237:8080/new/circ_detail.php?ID=rno-Pde3b_0003
circRNA_0382|Chr1:184008119_184055555_+	47437	1336	sense-overlapping	NM_017229.1	Chr1:183892841_184078071_+	Pde3b	GeneID:29516,Genbank:NM_017229.1,RGD:61943	phosphodiesterase 3B	GO:0050995,GO:0032045,GO:0016020,GO:0004115,GO:0032869,GO:0016021,GO:0051219,GO:0016101,GO:0004119,GO:0042593,GO:0005783,GO:0005794,GO:0006198,GO:0016525,GO:0043422,GO:0007162,GO:0046676,GO:0030552,GO:0001525,GO:0046872,GO:0031018,GO:0007165,GO:0004114,GO:0050796,GO:0008144	negative regulation of lipid catabolic process|guanyl-nucleotide exchange factor complex|membrane|3',5'-cyclic-AMP phosphodiesterase activity|cellular response to insulin stimulus|integral component of membrane|phosphoprotein binding|diterpenoid metabolic process|cGMP-inhibited cyclic-nucleotide phosphodiesterase activity|glucose homeostasis|endoplasmic reticulum|Golgi apparatus|cAMP catabolic pr…	rno00230,rno04371,rno04024,rno04022,rno04910,rno04922,rno04923,rno04914,rno04924,rno05032	Purine metabolism|Apelin signaling pathway|cAMP signaling pathway|cGMP - PKG signaling pathway|Insulin signaling pathway|Glucagon signaling pathway|Regulation of lipolysis in adipocyte|Progesterone-mediated oocyte maturation|Renin secretion|Morphine addiction	rno-Pde3b_0014	http://159.226.67.237:8080/new/circ_detail.php?ID=rno-Pde3b_0014
circRNA_0383|Chr1:184008119_184061174_+	53056	1536	sense-overlapping	NM_017229.1	Chr1:183892841_184078071_+	Pde3b	GeneID:29516,Genbank:NM_017229.1,RGD:61943	phosphodiesterase 3B	GO:0050995,GO:0032045,GO:0016020,GO:0004115,GO:0032869,GO:0016021,GO:0051219,GO:0016101,GO:0004119,GO:0042593,GO:0005783,GO:0005794,GO:0006198,GO:0016525,GO:0043422,GO:0007162,GO:0046676,GO:0030552,GO:0001525,GO:0046872,GO:0031018,GO:0007165,GO:0004114,GO:0050796,GO:0008144	negative regulation of lipid catabolic process|guanyl-nucleotide exchange factor complex|membrane|3',5'-cyclic-AMP phosphodiesterase activity|cellular response to insulin stimulus|integral component of membrane|phosphoprotein binding|diterpenoid metabolic process|cGMP-inhibited cyclic-nucleotide phosphodiesterase activity|glucose homeostasis|endoplasmic reticulum|Golgi apparatus|cAMP catabolic pr…	rno00230,rno04371,rno04024,rno04022,rno04910,rno04922,rno04923,rno04914,rno04924,rno05032	Purine metabolism|Apelin signaling pathway|cAMP signaling pathway|cGMP - PKG signaling pathway|Insulin signaling pathway|Glucagon signaling pathway|Regulation of lipolysis in adipocyte|Progesterone-mediated oocyte maturation|Renin secretion|Morphine addiction	rno-Pde3b_0005	http://159.226.67.237:8080/new/circ_detail.php?ID=rno-Pde3b_0005	RNO_CIRCpedia_6548	ENSRNOT00000015498.4	Pde3b
circRNA_0384|Chr1:184041764_184055555_+	13792	789	sense-overlapping	NM_017229.1	Chr1:183892841_184078071_+	Pde3b	GeneID:29516,Genbank:NM_017229.1,RGD:61943	phosphodiesterase 3B	GO:0050995,GO:0032045,GO:0016020,GO:0004115,GO:0032869,GO:0016021,GO:0051219,GO:0016101,GO:0004119,GO:0042593,GO:0005783,GO:0005794,GO:0006198,GO:0016525,GO:0043422,GO:0007162,GO:0046676,GO:0030552,GO:0001525,GO:0046872,GO:0031018,GO:0007165,GO:0004114,GO:0050796,GO:0008144	negative regulation of lipid catabolic process|guanyl-nucleotide exchange factor complex|membrane|3',5'-cyclic-AMP phosphodiesterase activity|cellular response to insulin stimulus|integral component of membrane|phosphoprotein binding|diterpenoid metabolic process|cGMP-inhibited cyclic-nucleotide phosphodiesterase activity|glucose homeostasis|endoplasmic reticulum|Golgi apparatus|cAMP catabolic pr…	rno00230,rno04371,rno04024,rno04022,rno04910,rno04922,rno04923,rno04914,rno04924,rno05032	Purine metabolism|Apelin signaling pathway|cAMP signaling pathway|cGMP - PKG signaling pathway|Insulin signaling pathway|Glucagon signaling pathway|Regulation of lipolysis in adipocyte|Progesterone-mediated oocyte maturation|Renin secretion|Morphine addiction	rno-Pde3b_0015	http://159.226.67.237:8080/new/circ_detail.php?ID=rno-Pde3b_0015	RNO_CIRCpedia_1822	ENSRNOT00000015498.4	Pde3b
circRNA_0385|Chr1:184041764_184061174_+	19411	989	sense-overlapping	NM_017229.1	Chr1:183892841_184078071_+	Pde3b	GeneID:29516,Genbank:NM_017229.1,RGD:61943	phosphodiesterase 3B	GO:0050995,GO:0032045,GO:0016020,GO:0004115,GO:0032869,GO:0016021,GO:0051219,GO:0016101,GO:0004119,GO:0042593,GO:0005783,GO:0005794,GO:0006198,GO:0016525,GO:0043422,GO:0007162,GO:0046676,GO:0030552,GO:0001525,GO:0046872,GO:0031018,GO:0007165,GO:0004114,GO:0050796,GO:0008144	negative regulation of lipid catabolic process|guanyl-nucleotide exchange factor complex|membrane|3',5'-cyclic-AMP phosphodiesterase activity|cellular response to insulin stimulus|integral component of membrane|phosphoprotein binding|diterpenoid metabolic process|cGMP-inhibited cyclic-nucleotide phosphodiesterase activity|glucose homeostasis|endoplasmic reticulum|Golgi apparatus|cAMP catabolic pr…	rno00230,rno04371,rno04024,rno04022,rno04910,rno04922,rno04923,rno04914,rno04924,rno05032	Purine metabolism|Apelin signaling pathway|cAMP signaling pathway|cGMP - PKG signaling pathway|Insulin signaling pathway|Glucagon signaling pathway|Regulation of lipolysis in adipocyte|Progesterone-mediated oocyte maturation|Renin secretion|Morphine addiction	rno-Pde3b_0013	http://159.226.67.237:8080/new/circ_detail.php?ID=rno-Pde3b_0013	RNO_CIRCpedia_1823	ENSRNOT00000015498.4	Pde3b
circRNA_0386|Chr1:184041764_184077314_+	35551	2092	sense-overlapping	NM_017229.1	Chr1:183892841_184078071_+	Pde3b	GeneID:29516,Genbank:NM_017229.1,RGD:61943	phosphodiesterase 3B	GO:0050995,GO:0032045,GO:0016020,GO:0004115,GO:0032869,GO:0016021,GO:0051219,GO:0016101,GO:0004119,GO:0042593,GO:0005783,GO:0005794,GO:0006198,GO:0016525,GO:0043422,GO:0007162,GO:0046676,GO:0030552,GO:0001525,GO:0046872,GO:0031018,GO:0007165,GO:0004114,GO:0050796,GO:0008144	negative regulation of lipid catabolic process|guanyl-nucleotide exchange factor complex|membrane|3',5'-cyclic-AMP phosphodiesterase activity|cellular response to insulin stimulus|integral component of membrane|phosphoprotein binding|diterpenoid metabolic process|cGMP-inhibited cyclic-nucleotide phosphodiesterase activity|glucose homeostasis|endoplasmic reticulum|Golgi apparatus|cAMP catabolic pr…	rno00230,rno04371,rno04024,rno04022,rno04910,rno04922,rno04923,rno04914,rno04924,rno05032	Purine metabolism|Apelin signaling pathway|cAMP signaling pathway|cGMP - PKG signaling pathway|Insulin signaling pathway|Glucagon signaling pathway|Regulation of lipolysis in adipocyte|Progesterone-mediated oocyte maturation|Renin secretion|Morphine addiction	rno-Pde3b_0023	http://159.226.67.237:8080/new/circ_detail.php?ID=rno-Pde3b_0023
circRNA_0387|Chr1:185118848_185119118_-	271	94	sense-overlapping	NM_021663.2	Chr1:185106773_185143207_-	Nucb2	GeneID:59295,Genbank:NM_021663.2,RGD:620888	nucleobindin 2	GO:2000845,GO:0042594,GO:0005509,GO:0043951,GO:0005615,GO:0044752,GO:0005634,GO:0005640,GO:0005737,GO:0045599,GO:0005783,GO:0046321,GO:0046627,GO:0005793,GO:0070093,GO:0005797,GO:0003677,GO:1901142,GO:0009749,GO:0005164,GO:1990680,GO:0032099	positive regulation of testosterone secretion|response to starvation|calcium ion binding|negative regulation of cAMP-mediated signaling|extracellular space|response to human chorionic gonadotropin|nucleus|nuclear outer membrane|cytoplasm|negative regulation of fat cell differentiation|endoplasmic reticulum|positive regulation of fatty acid oxidation|negative regulation of insulin receptor signali…			rno-Nucb2_0008	http://159.226.67.237:8080/new/circ_detail.php?ID=rno-Nucb2_0008
circRNA_0388|Chr1:185233419_185234547_+	1129	1129	exonic	NM_001108500.1	Chr1:185210922_185326314_+	Pik3c2a	GeneID:361632,Genbank:NM_001108500.1,RGD:1310389	phosphatidylinositol-4-phosphate 3-kinase, catalytic subunit type 2 alpha	GO:0090050,GO:0036092,GO:0016020,GO:0005634,GO:1905037,GO:0016236,GO:0005737,GO:0046854,GO:0016303,GO:0005886,GO:0005942,GO:0048015,GO:0016477,GO:0006897,GO:0048268,GO:0031982,GO:0052742,GO:0008150,GO:0003674,GO:0071583,GO:0035005,GO:0009267,GO:0005575,GO:0035091,GO:0014065	positive regulation of cell migration involved in sprouting angiogenesis|phosphatidylinositol-3-phosphate biosynthetic process|membrane|nucleus|autophagosome organization|macroautophagy|cytoplasm|phosphatidylinositol phosphorylation|1-phosphatidylinositol-3-kinase activity|plasma membrane|phosphatidylinositol 3-kinase complex|phosphatidylinositol-mediated signaling|cell migration|endocytosis|clat…	rno00562,rno04070	Inositol phosphate metabolism|Phosphatidylinositol signaling system	rno-Pik3c2a_0016	http://159.226.67.237:8080/new/circ_detail.php?ID=rno-Pik3c2a_0016	RNO_CIRCpedia_1824	NM_001108500	Pik3c2a
circRNA_0389|Chr1:185252579_185264972_+	12394	495	sense-overlapping	NM_001108500.1	Chr1:185210922_185326314_+	Pik3c2a	GeneID:361632,Genbank:NM_001108500.1,RGD:1310389	phosphatidylinositol-4-phosphate 3-kinase, catalytic subunit type 2 alpha	GO:0090050,GO:0036092,GO:0016020,GO:0005634,GO:1905037,GO:0016236,GO:0005737,GO:0046854,GO:0016303,GO:0005886,GO:0005942,GO:0048015,GO:0016477,GO:0006897,GO:0048268,GO:0031982,GO:0052742,GO:0008150,GO:0003674,GO:0071583,GO:0035005,GO:0009267,GO:0005575,GO:0035091,GO:0014065	positive regulation of cell migration involved in sprouting angiogenesis|phosphatidylinositol-3-phosphate biosynthetic process|membrane|nucleus|autophagosome organization|macroautophagy|cytoplasm|phosphatidylinositol phosphorylation|1-phosphatidylinositol-3-kinase activity|plasma membrane|phosphatidylinositol 3-kinase complex|phosphatidylinositol-mediated signaling|cell migration|endocytosis|clat…	rno00562,rno04070	Inositol phosphate metabolism|Phosphatidylinositol signaling system	rno-Pik3c2a_0019	http://159.226.67.237:8080/new/circ_detail.php?ID=rno-Pik3c2a_0019	RNO_CIRCpedia_1826	NM_001108500	Pik3c2a
circRNA_0390|Chr1:185261106_185264972_+	3867	391	sense-overlapping	NM_001108500.1	Chr1:185210922_185326314_+	Pik3c2a	GeneID:361632,Genbank:NM_001108500.1,RGD:1310389	phosphatidylinositol-4-phosphate 3-kinase, catalytic subunit type 2 alpha	GO:0090050,GO:0036092,GO:0016020,GO:0005634,GO:1905037,GO:0016236,GO:0005737,GO:0046854,GO:0016303,GO:0005886,GO:0005942,GO:0048015,GO:0016477,GO:0006897,GO:0048268,GO:0031982,GO:0052742,GO:0008150,GO:0003674,GO:0071583,GO:0035005,GO:0009267,GO:0005575,GO:0035091,GO:0014065	positive regulation of cell migration involved in sprouting angiogenesis|phosphatidylinositol-3-phosphate biosynthetic process|membrane|nucleus|autophagosome organization|macroautophagy|cytoplasm|phosphatidylinositol phosphorylation|1-phosphatidylinositol-3-kinase activity|plasma membrane|phosphatidylinositol 3-kinase complex|phosphatidylinositol-mediated signaling|cell migration|endocytosis|clat…	rno00562,rno04070	Inositol phosphate metabolism|Phosphatidylinositol signaling system	rno-Pik3c2a_0022	http://159.226.67.237:8080/new/circ_detail.php?ID=rno-Pik3c2a_0022	RNO_CIRCpedia_1827	NM_001108500	Pik3c2a
circRNA_0391|Chr1:185261106_185267832_+	6727	535	sense-overlapping	NM_001108500.1	Chr1:185210922_185326314_+	Pik3c2a	GeneID:361632,Genbank:NM_001108500.1,RGD:1310389	phosphatidylinositol-4-phosphate 3-kinase, catalytic subunit type 2 alpha	GO:0090050,GO:0036092,GO:0016020,GO:0005634,GO:1905037,GO:0016236,GO:0005737,GO:0046854,GO:0016303,GO:0005886,GO:0005942,GO:0048015,GO:0016477,GO:0006897,GO:0048268,GO:0031982,GO:0052742,GO:0008150,GO:0003674,GO:0071583,GO:0035005,GO:0009267,GO:0005575,GO:0035091,GO:0014065	positive regulation of cell migration involved in sprouting angiogenesis|phosphatidylinositol-3-phosphate biosynthetic process|membrane|nucleus|autophagosome organization|macroautophagy|cytoplasm|phosphatidylinositol phosphorylation|1-phosphatidylinositol-3-kinase activity|plasma membrane|phosphatidylinositol 3-kinase complex|phosphatidylinositol-mediated signaling|cell migration|endocytosis|clat…	rno00562,rno04070	Inositol phosphate metabolism|Phosphatidylinositol signaling system	rno-Pik3c2a_0003	http://159.226.67.237:8080/new/circ_detail.php?ID=rno-Pik3c2a_0003	RNO_CIRCpedia_1828	NM_001108500	Pik3c2a
circRNA_0392|Chr1:185261106_185297636_+	36531	1339	sense-overlapping	NM_001108500.1	Chr1:185210922_185326314_+	Pik3c2a	GeneID:361632,Genbank:NM_001108500.1,RGD:1310389	phosphatidylinositol-4-phosphate 3-kinase, catalytic subunit type 2 alpha	GO:0090050,GO:0036092,GO:0016020,GO:0005634,GO:1905037,GO:0016236,GO:0005737,GO:0046854,GO:0016303,GO:0005886,GO:0005942,GO:0048015,GO:0016477,GO:0006897,GO:0048268,GO:0031982,GO:0052742,GO:0008150,GO:0003674,GO:0071583,GO:0035005,GO:0009267,GO:0005575,GO:0035091,GO:0014065	positive regulation of cell migration involved in sprouting angiogenesis|phosphatidylinositol-3-phosphate biosynthetic process|membrane|nucleus|autophagosome organization|macroautophagy|cytoplasm|phosphatidylinositol phosphorylation|1-phosphatidylinositol-3-kinase activity|plasma membrane|phosphatidylinositol 3-kinase complex|phosphatidylinositol-mediated signaling|cell migration|endocytosis|clat…	rno00562,rno04070	Inositol phosphate metabolism|Phosphatidylinositol signaling system	rno-Pik3c2a_0035	http://159.226.67.237:8080/new/circ_detail.php?ID=rno-Pik3c2a_0035
circRNA_0393|Chr1:185263914_185267832_+	3919	377	sense-overlapping	NM_001108500.1	Chr1:185210922_185326314_+	Pik3c2a	GeneID:361632,Genbank:NM_001108500.1,RGD:1310389	phosphatidylinositol-4-phosphate 3-kinase, catalytic subunit type 2 alpha	GO:0090050,GO:0036092,GO:0016020,GO:0005634,GO:1905037,GO:0016236,GO:0005737,GO:0046854,GO:0016303,GO:0005886,GO:0005942,GO:0048015,GO:0016477,GO:0006897,GO:0048268,GO:0031982,GO:0052742,GO:0008150,GO:0003674,GO:0071583,GO:0035005,GO:0009267,GO:0005575,GO:0035091,GO:0014065	positive regulation of cell migration involved in sprouting angiogenesis|phosphatidylinositol-3-phosphate biosynthetic process|membrane|nucleus|autophagosome organization|macroautophagy|cytoplasm|phosphatidylinositol phosphorylation|1-phosphatidylinositol-3-kinase activity|plasma membrane|phosphatidylinositol 3-kinase complex|phosphatidylinositol-mediated signaling|cell migration|endocytosis|clat…	rno00562,rno04070	Inositol phosphate metabolism|Phosphatidylinositol signaling system	rno-Pik3c2a_0002	http://159.226.67.237:8080/new/circ_detail.php?ID=rno-Pik3c2a_0002	RNO_CIRCpedia_1830	NM_001108500	Pik3c2a
circRNA_0394|Chr1:185263914_185297636_+	33723	1181	sense-overlapping	NM_001108500.1	Chr1:185210922_185326314_+	Pik3c2a	GeneID:361632,Genbank:NM_001108500.1,RGD:1310389	phosphatidylinositol-4-phosphate 3-kinase, catalytic subunit type 2 alpha	GO:0090050,GO:0036092,GO:0016020,GO:0005634,GO:1905037,GO:0016236,GO:0005737,GO:0046854,GO:0016303,GO:0005886,GO:0005942,GO:0048015,GO:0016477,GO:0006897,GO:0048268,GO:0031982,GO:0052742,GO:0008150,GO:0003674,GO:0071583,GO:0035005,GO:0009267,GO:0005575,GO:0035091,GO:0014065	positive regulation of cell migration involved in sprouting angiogenesis|phosphatidylinositol-3-phosphate biosynthetic process|membrane|nucleus|autophagosome organization|macroautophagy|cytoplasm|phosphatidylinositol phosphorylation|1-phosphatidylinositol-3-kinase activity|plasma membrane|phosphatidylinositol 3-kinase complex|phosphatidylinositol-mediated signaling|cell migration|endocytosis|clat…	rno00562,rno04070	Inositol phosphate metabolism|Phosphatidylinositol signaling system	rno-Pik3c2a_0005	http://159.226.67.237:8080/new/circ_detail.php?ID=rno-Pik3c2a_0005	RNO_CIRCpedia_5130	NM_001108500	Pik3c2a
circRNA_0395|Chr1:185298317_185307538_+	9222	903	sense-overlapping	NM_001108500.1	Chr1:185210922_185326314_+	Pik3c2a	GeneID:361632,Genbank:NM_001108500.1,RGD:1310389	phosphatidylinositol-4-phosphate 3-kinase, catalytic subunit type 2 alpha	GO:0090050,GO:0036092,GO:0016020,GO:0005634,GO:1905037,GO:0016236,GO:0005737,GO:0046854,GO:0016303,GO:0005886,GO:0005942,GO:0048015,GO:0016477,GO:0006897,GO:0048268,GO:0031982,GO:0052742,GO:0008150,GO:0003674,GO:0071583,GO:0035005,GO:0009267,GO:0005575,GO:0035091,GO:0014065	positive regulation of cell migration involved in sprouting angiogenesis|phosphatidylinositol-3-phosphate biosynthetic process|membrane|nucleus|autophagosome organization|macroautophagy|cytoplasm|phosphatidylinositol phosphorylation|1-phosphatidylinositol-3-kinase activity|plasma membrane|phosphatidylinositol 3-kinase complex|phosphatidylinositol-mediated signaling|cell migration|endocytosis|clat…	rno00562,rno04070	Inositol phosphate metabolism|Phosphatidylinositol signaling system	rno-Pik3c2a_0025	http://159.226.67.237:8080/new/circ_detail.php?ID=rno-Pik3c2a_0025	RNO_CIRCpedia_8415	NM_001108500	Pik3c2a
circRNA_0396|Chr1:185303474_185307538_+	4065	568	sense-overlapping	NM_001108500.1	Chr1:185210922_185326314_+	Pik3c2a	GeneID:361632,Genbank:NM_001108500.1,RGD:1310389	phosphatidylinositol-4-phosphate 3-kinase, catalytic subunit type 2 alpha	GO:0090050,GO:0036092,GO:0016020,GO:0005634,GO:1905037,GO:0016236,GO:0005737,GO:0046854,GO:0016303,GO:0005886,GO:0005942,GO:0048015,GO:0016477,GO:0006897,GO:0048268,GO:0031982,GO:0052742,GO:0008150,GO:0003674,GO:0071583,GO:0035005,GO:0009267,GO:0005575,GO:0035091,GO:0014065	positive regulation of cell migration involved in sprouting angiogenesis|phosphatidylinositol-3-phosphate biosynthetic process|membrane|nucleus|autophagosome organization|macroautophagy|cytoplasm|phosphatidylinositol phosphorylation|1-phosphatidylinositol-3-kinase activity|plasma membrane|phosphatidylinositol 3-kinase complex|phosphatidylinositol-mediated signaling|cell migration|endocytosis|clat…	rno00562,rno04070	Inositol phosphate metabolism|Phosphatidylinositol signaling system	rno-Pik3c2a_0010	http://159.226.67.237:8080/new/circ_detail.php?ID=rno-Pik3c2a_0010	RNO_CIRCpedia_8416	NM_001108500	Pik3c2a
circRNA_0397|Chr1:185306404_185307538_+	1135	198	sense-overlapping	NM_001108500.1	Chr1:185210922_185326314_+	Pik3c2a	GeneID:361632,Genbank:NM_001108500.1,RGD:1310389	phosphatidylinositol-4-phosphate 3-kinase, catalytic subunit type 2 alpha	GO:0090050,GO:0036092,GO:0016020,GO:0005634,GO:1905037,GO:0016236,GO:0005737,GO:0046854,GO:0016303,GO:0005886,GO:0005942,GO:0048015,GO:0016477,GO:0006897,GO:0048268,GO:0031982,GO:0052742,GO:0008150,GO:0003674,GO:0071583,GO:0035005,GO:0009267,GO:0005575,GO:0035091,GO:0014065	positive regulation of cell migration involved in sprouting angiogenesis|phosphatidylinositol-3-phosphate biosynthetic process|membrane|nucleus|autophagosome organization|macroautophagy|cytoplasm|phosphatidylinositol phosphorylation|1-phosphatidylinositol-3-kinase activity|plasma membrane|phosphatidylinositol 3-kinase complex|phosphatidylinositol-mediated signaling|cell migration|endocytosis|clat…	rno00562,rno04070	Inositol phosphate metabolism|Phosphatidylinositol signaling system	rno-Pik3c2a_0001	http://159.226.67.237:8080/new/circ_detail.php?ID=rno-Pik3c2a_0001	RNO_CIRCpedia_1832	NM_001108500	Pik3c2a
circRNA_0398|Chr1:185313448_185317183_+	3736	645	sense-overlapping	NM_001108500.1	Chr1:185210922_185326314_+	Pik3c2a	GeneID:361632,Genbank:NM_001108500.1,RGD:1310389	phosphatidylinositol-4-phosphate 3-kinase, catalytic subunit type 2 alpha	GO:0090050,GO:0036092,GO:0016020,GO:0005634,GO:1905037,GO:0016236,GO:0005737,GO:0046854,GO:0016303,GO:0005886,GO:0005942,GO:0048015,GO:0016477,GO:0006897,GO:0048268,GO:0031982,GO:0052742,GO:0008150,GO:0003674,GO:0071583,GO:0035005,GO:0009267,GO:0005575,GO:0035091,GO:0014065	positive regulation of cell migration involved in sprouting angiogenesis|phosphatidylinositol-3-phosphate biosynthetic process|membrane|nucleus|autophagosome organization|macroautophagy|cytoplasm|phosphatidylinositol phosphorylation|1-phosphatidylinositol-3-kinase activity|plasma membrane|phosphatidylinositol 3-kinase complex|phosphatidylinositol-mediated signaling|cell migration|endocytosis|clat…	rno00562,rno04070	Inositol phosphate metabolism|Phosphatidylinositol signaling system	rno-Pik3c2a_0027	http://159.226.67.237:8080/new/circ_detail.php?ID=rno-Pik3c2a_0027
circRNA_0399|Chr1:185495031_185495489_+	459	459	intergenic										rno-Plekha7_0005	http://159.226.67.237:8080/new/circ_detail.php?ID=rno-Plekha7_0005	RNO_CIRCpedia_1834	ENSRNOT00000086681.1	Plekha7
circRNA_0400|Chr1:185501062_185504507_+	3446	3446	intergenic										rno-Plekha7_0003	http://159.226.67.237:8080/new/circ_detail.php?ID=rno-Plekha7_0003
circRNA_0401|Chr1:186006551_186009525_+	2975	242	sense-overlapping	XM_017588969.1	Chr1:185631702_186186139_+	Sox6	GeneID:293165,Genbank:XM_017588969.1,RGD:1309000	SRY box 6, transcript variant X7	GO:2000741,GO:0046982,GO:0030218,GO:0001078,GO:0048708,GO:0032332,GO:0001701,GO:0048709,GO:0042692,GO:0003677,GO:0048821,GO:0003700,GO:0005634,GO:0005654,GO:0043565,GO:0006355,GO:0051216,GO:0044212,GO:0009791,GO:0055007,GO:0045165,GO:0010468,GO:0061036,GO:0045892,GO:0016458,GO:0000122,GO:0071560,GO:0045893,GO:0021778,GO:0000902,GO:2000726,GO:0045944,GO:0030097,GO:0000978	positive regulation of mesenchymal stem cell differentiation|protein heterodimerization activity|erythrocyte differentiation|transcriptional repressor activity, RNA polymerase II proximal promoter sequence-specific DNA binding|astrocyte differentiation|positive regulation of chondrocyte differentiation|in utero embryonic development|oligodendrocyte differentiation|muscle cell differentiation|DNA …			rno-Sox6_0009	http://159.226.67.237:8080/new/circ_detail.php?ID=rno-Sox6_0009	RNO_CIRCpedia_1838	ENSRNOT00000048020.4	Sox6
circRNA_0402|Chr1:186067925_186077730_+	9806	201	sense-overlapping	XM_017588969.1	Chr1:185631702_186186139_+	Sox6	GeneID:293165,Genbank:XM_017588969.1,RGD:1309000	SRY box 6, transcript variant X7	GO:2000741,GO:0046982,GO:0030218,GO:0001078,GO:0048708,GO:0032332,GO:0001701,GO:0048709,GO:0042692,GO:0003677,GO:0048821,GO:0003700,GO:0005634,GO:0005654,GO:0043565,GO:0006355,GO:0051216,GO:0044212,GO:0009791,GO:0055007,GO:0045165,GO:0010468,GO:0061036,GO:0045892,GO:0016458,GO:0000122,GO:0071560,GO:0045893,GO:0021778,GO:0000902,GO:2000726,GO:0045944,GO:0030097,GO:0000978	positive regulation of mesenchymal stem cell differentiation|protein heterodimerization activity|erythrocyte differentiation|transcriptional repressor activity, RNA polymerase II proximal promoter sequence-specific DNA binding|astrocyte differentiation|positive regulation of chondrocyte differentiation|in utero embryonic development|oligodendrocyte differentiation|muscle cell differentiation|DNA …
circRNA_0403|Chr1:187776387_187777086_-	700	254	sense-overlapping	NM_198737.2	Chr1:187770160_187779675_-	Arl6ip1	GeneID:293551,Genbank:NM_198737.2,RGD:735205	ADP-ribosylation factor like GTPase 6 interacting protein 1	GO:1990809,GO:0005784,GO:0005789,GO:0005829,GO:0006613,GO:0016021,GO:0030176,GO:0042802,GO:0043066,GO:0002038,GO:0043154,GO:0005737,GO:0071787,GO:0005783	endoplasmic reticulum tubular network membrane organization|Sec61 translocon complex|endoplasmic reticulum membrane|cytosol|cotranslational protein targeting to membrane|integral component of membrane|integral component of endoplasmic reticulum membrane|identical protein binding|negative regulation of apoptotic process|positive regulation of L-glutamate import across plasma membrane|negative regu…			rno-Arl6ip1_0001	http://159.226.67.237:8080/new/circ_detail.php?ID=rno-Arl6ip1_0001	RNO_CIRCpedia_1841	NM_198737	Arl6ip1
circRNA_0404|Chr1:187834862_187842308_-	7447	1115	sense-overlapping	XM_008759828.2	Chr1:187781577_187882833_-	Smg1	GeneID:691397,Genbank:XM_008759828.2,RGD:1563508	SMG1, nonsense mediated mRNA decay associated PI3K related kinase, transcript variant X1	GO:0005654,GO:0005737,GO:0018105,GO:0032204,GO:0042162,GO:0046777,GO:0046854,GO:2001020,GO:0000184,GO:0004674,GO:0005634	nucleoplasm|cytoplasm|peptidyl-serine phosphorylation|regulation of telomere maintenance|telomeric DNA binding|protein autophosphorylation|phosphatidylinositol phosphorylation|regulation of response to DNA damage stimulus|nuclear-transcribed mRNA catabolic process, nonsense-mediated decay|protein serine/threonine kinase activity|nucleus	rno03015	mRNA surveillance pathway	rno-Smg1_0011	http://159.226.67.237:8080/new/circ_detail.php?ID=rno-Smg1_0011	RNO_CIRCpedia_1843	ENSRNOT00000092467.1	Smg1
circRNA_0405|Chr1:188061837_188096863_-	35027	1213	sense-overlapping	XM_017588772.1	Chr1:188034614_188097369_-	Syt17	GeneID:192189,Genbank:XM_017588772.1,RGD:708576	synaptotagmin 17, transcript variant X7	GO:0005886,GO:0006887,GO:0006906,GO:0016020,GO:0016079,GO:0017158,GO:0019905,GO:0030276,GO:0030672,GO:0048488,GO:0048791,GO:0005509,GO:0098793,GO:0005544,GO:1903861,GO:0005802	plasma membrane|exocytosis|vesicle fusion|membrane|synaptic vesicle exocytosis|regulation of calcium ion-dependent exocytosis|syntaxin binding|clathrin binding|synaptic vesicle membrane|synaptic vesicle endocytosis|calcium ion-regulated exocytosis of neurotransmitter|calcium ion binding|presynapse|calcium-dependent phospholipid binding|positive regulation of dendrite extension|trans-Golgi network
circRNA_0406|Chr1:188510274_188516444_+	6171	356	sense-overlapping	XM_006230122.3	Chr1:188448517_188552268_+	LOC361635	GeneID:361635,Genbank:XM_006230122.3,RGD:1564485	similar to RIKEN cDNA 9030624J02, transcript variant X1	GO:0016021,GO:0005769,GO:0006893,GO:0015031	integral component of membrane|early endosome|Golgi to plasma membrane transport|protein transport			rno-LOC361635_0003	http://159.226.67.237:8080/new/circ_detail.php?ID=rno-LOC361635_0003
circRNA_0407|Chr1:188510274_188530025_+	19752	496	sense-overlapping	XM_006230122.3	Chr1:188448517_188552268_+	LOC361635	GeneID:361635,Genbank:XM_006230122.3,RGD:1564485	similar to RIKEN cDNA 9030624J02, transcript variant X1	GO:0016021,GO:0005769,GO:0006893,GO:0015031	integral component of membrane|early endosome|Golgi to plasma membrane transport|protein transport			rno-LOC361635_0002	http://159.226.67.237:8080/new/circ_detail.php?ID=rno-LOC361635_0002
circRNA_0408|Chr1:188516330_188544229_+	27900	421	sense-overlapping	XM_006230122.3	Chr1:188448517_188552268_+	LOC361635	GeneID:361635,Genbank:XM_006230122.3,RGD:1564485	similar to RIKEN cDNA 9030624J02, transcript variant X1	GO:0016021,GO:0005769,GO:0006893,GO:0015031	integral component of membrane|early endosome|Golgi to plasma membrane transport|protein transport			rno-LOC361635_0001	http://159.226.67.237:8080/new/circ_detail.php?ID=rno-LOC361635_0001
circRNA_0409|Chr1:189679087_189685094_+	6008	429	sense-overlapping	XM_006230134.3	Chr1:189665401_189685836_+	Lyrm1	GeneID:365361,Genbank:XM_006230134.3,RGD:1563498	LYR motif containing 1, transcript variant X3	GO:0005739,GO:0030496,GO:0005654	mitochondrion|midbody|nucleoplasm			rno-Lyrm1_0001	http://159.226.67.237:8080/new/circ_detail.php?ID=rno-Lyrm1_0001
circRNA_0410|Chr1:190557651_190557983_+	333	231	sense-overlapping	NM_001006970.1	Chr1:190555177_190585741_+	Uqcrc2	GeneID:293448,Genbank:NM_001006970.1,RGD:1359150	ubiquinol cytochrome c reductase core protein 2	GO:0005739,GO:0005743,GO:0005750,GO:0005751,GO:0006627,GO:0008270,GO:0016485,GO:0043209,GO:0044877,GO:0004222,GO:0055114,GO:0005654	mitochondrion|mitochondrial inner membrane|mitochondrial respiratory chain complex III|mitochondrial respiratory chain complex IV|protein processing involved in protein targeting to mitochondrion|zinc ion binding|protein processing|myelin sheath|protein-containing complex binding|metalloendopeptidase activity|oxidation-reduction process|nucleoplasm	rno00190,rno04260,rno04714,rno05010,rno05012,rno05016,rno04932	Oxidative phosphorylation|Cardiac muscle contraction|Thermogenesis|Alzheimer's disease|Parkinson's disease|Huntington's disease|Non-alcoholic fatty liver disease (NAFLD)
circRNA_0411|Chr1:190865149_190865384_+	236	236	intronic	XM_006230168.3	Chr1:190852954_190881539_+	Polr3e	GeneID:361640,Genbank:XM_006230168.3,RGD:1308086	polymerase (RNA) III subunit E, transcript variant X1	GO:0005575,GO:0005634,GO:0005654,GO:0005666,GO:0006383,GO:0008150,GO:0001056,GO:0003674	cellular_component|nucleus|nucleoplasm|DNA-directed RNA polymerase III complex|transcription by RNA polymerase III|biological_process|RNA polymerase III activity|molecular_function	rno00230,rno00240,rno03020,rno04623,rno05169	Purine metabolism|Pyrimidine metabolism|RNA polymerase|Cytosolic DNA-sensing pathway|Epstein-Barr virus infection	rno-Polr3e_0002	http://159.226.67.237:8080/new/circ_detail.php?ID=rno-Polr3e_0002
circRNA_0412|Chr1:190978132_190991049_+	12918	3318	sense-overlapping	XM_008759659.2	Chr1:190962935_191009926_+	Mettl9	GeneID:100302453,Genbank:XM_008759659.2,RGD:2311609	methyltransferase like 9, transcript variant X3					rno-Mettl9_0004	http://159.226.67.237:8080/new/circ_detail.php?ID=rno-Mettl9_0004
circRNA_0413|Chr1:190980864_190985358_+	4495	401	sense-overlapping	XM_008759659.2	Chr1:190962935_191009926_+	Mettl9	GeneID:100302453,Genbank:XM_008759659.2,RGD:2311609	methyltransferase like 9, transcript variant X3					rno-Mettl9_0003	http://159.226.67.237:8080/new/circ_detail.php?ID=rno-Mettl9_0003	RNO_CIRCpedia_5142	NM_001163164	Mettl9
circRNA_0414|Chr1:190980864_190991049_+	10186	586	sense-overlapping	XM_008759659.2	Chr1:190962935_191009926_+	Mettl9	GeneID:100302453,Genbank:XM_008759659.2,RGD:2311609	methyltransferase like 9, transcript variant X3					rno-Mettl9_0001	http://159.226.67.237:8080/new/circ_detail.php?ID=rno-Mettl9_0001	RNO_CIRCpedia_1850	NM_001163164	Mettl9
circRNA_0415|Chr1:191635362_191651628_-	16267	1194	sense-overlapping	NM_001107548.1	Chr1:191615146_191651628_-	Usp31	GeneID:308959,Genbank:NM_001107548.1,RGD:1308183	ubiquitin specific peptidase 31	GO:0016579,GO:0004843,GO:0005634,GO:0006511	protein deubiquitination|thiol-dependent ubiquitin-specific protease activity|nucleus|ubiquitin-dependent protein catabolic process			rno-Usp31_0001	http://159.226.67.237:8080/new/circ_detail.php?ID=rno-Usp31_0001
circRNA_0416|Chr1:191711713_191713092_-	1380	201	antisense	NM_017046.1	Chr1:191704397_191738271_+	Scnn1g	GeneID:24768,Genbank:NM_017046.1,RGD:3641	sodium channel epithelial 1 gamma subunit	GO:0005887,GO:0006814,GO:0009897,GO:0009986,GO:0035725,GO:0015280,GO:0050699,GO:0050891,GO:0050909,GO:0055078,GO:0001666,GO:0005216,GO:0005272,GO:0005515,GO:0005654,GO:0005886,GO:0016020,GO:0016021,GO:0016324,GO:0034706,GO:0070062,GO:0035313	integral component of plasma membrane|sodium ion transport|external side of plasma membrane|cell surface|sodium ion transmembrane transport|ligand-gated sodium channel activity|WW domain binding|multicellular organismal water homeostasis|sensory perception of taste|sodium ion homeostasis|response to hypoxia|ion channel activity|sodium channel activity|protein binding|nucleoplasm|plasma membrane|m…	rno04960,rno04742	Aldosterone-regulated sodium reabsorption|Taste transduction
circRNA_0417|Chr1:191971118_191975867_-	4750	384	sense-overlapping	NM_001100519.1	Chr1:191951578_191984858_-	Gga2	GeneID:293455,Genbank:NM_001100519.1,RGD:1304800	golgi associated, gamma adaptin ear containing, ARF binding protein 2	GO:0016192,GO:0030131,GO:0030136,GO:0030306,GO:0005794,GO:0005802,GO:0006886	vesicle-mediated transport|clathrin adaptor complex|clathrin-coated vesicle|ADP-ribosylation factor binding|Golgi apparatus|trans-Golgi network|intracellular protein transport	rno04142	Lysosome
circRNA_0418|Chr1:192089780_192095234_+	5455	300	sense-overlapping	NM_001037778.1	Chr1:192088709_192105421_+	Dctn5	GeneID:308961,Genbank:NM_001037778.1,RGD:1305654	dynactin subunit 5	GO:0005654,GO:0005813,GO:0008150,GO:0031965,GO:0035904,GO:0060976,GO:0003281,GO:0003674,GO:0005575	nucleoplasm|centrosome|biological_process|nuclear membrane|aorta development|coronary vasculature development|ventricular septum development|molecular_function|cellular_component	rno04962	Vasopressin-regulated water reabsorption	rno-Dctn5_0001	http://159.226.67.237:8080/new/circ_detail.php?ID=rno-Dctn5_0001	RNO_CIRCpedia_5143	ENSRNOT00000024367.5	Dctn5
circRNA_0419|Chr1:192379875_192409606_+	29732	324	sense-overlapping	XM_017588799.1	Chr1:192233569_192575339_+	Prkcb	GeneID:25023,Genbank:XM_017588799.1,RGD:3396	protein kinase C, beta, transcript variant X1	GO:0004697,GO:0005080,GO:0005246,GO:0005886,GO:0005515,GO:0005524,GO:0006351,GO:0005622,GO:0006357,GO:0006468,GO:0018105,GO:0018894,GO:0006816,GO:0030374,GO:0030949,GO:0001666,GO:0042113,GO:0031526,GO:0033280,GO:0002250,GO:0042393,GO:0003682,GO:0042488,GO:0004674,GO:0050853,GO:0042493,GO:0043123,GO:0050861,GO:0051092,GO:0071322,GO:0005634,GO:0005654,GO:0005737,GO:0005813,GO:0005829,GO:0006874,GO:…	protein kinase C activity|protein kinase C binding|calcium channel regulator activity|plasma membrane|protein binding|ATP binding|transcription, DNA-templated|intracellular|regulation of transcription by RNA polymerase II|protein phosphorylation|peptidyl-serine phosphorylation|dibenzo-p-dioxin metabolic process|calcium ion transport|ligand-dependent nuclear receptor transcription coactivator acti…	rno04014,rno04015,rno04010,rno04012,rno04310,rno04370,rno04064,rno04066,rno04020,rno04070,rno04071,rno04150,rno04510,rno04540,rno04650,rno04662,rno04666,rno04670,rno04062,rno04911,rno04912,rno04921,rno04918,rno04919,rno04916,rno04925,rno04270,rno04970,rno04971,rno04972,rno04973,rno04960,rno04961,rno04724,rno04727,rno04725,rno04728,rno04726,rno04720,rno04730,rno04723,rno04750,rno04713,rno05200,rno…	Ras signaling pathway|Rap1 signaling pathway|MAPK signaling pathway|ErbB signaling pathway|Wnt signaling pathway|VEGF signaling pathway|NF-kappa B signaling pathway|HIF-1 signaling pathway|Calcium signaling pathway|Phosphatidylinositol signaling system|Sphingolipid signaling pathway|mTOR signaling pathway|Focal adhesion|Gap junction|Natural killer cell mediated cytotoxicity|B cell receptor signal…	rno-Prkcb_0007	http://159.226.67.237:8080/new/circ_detail.php?ID=rno-Prkcb_0007
circRNA_0420|Chr1:192465806_192467204_+	1399	292	sense-overlapping	XM_017588799.1	Chr1:192233569_192575339_+	Prkcb	GeneID:25023,Genbank:XM_017588799.1,RGD:3396	protein kinase C, beta, transcript variant X1	GO:0004697,GO:0005080,GO:0005246,GO:0005886,GO:0005515,GO:0005524,GO:0006351,GO:0005622,GO:0006357,GO:0006468,GO:0018105,GO:0018894,GO:0006816,GO:0030374,GO:0030949,GO:0001666,GO:0042113,GO:0031526,GO:0033280,GO:0002250,GO:0042393,GO:0003682,GO:0042488,GO:0004674,GO:0050853,GO:0042493,GO:0043123,GO:0050861,GO:0051092,GO:0071322,GO:0005634,GO:0005654,GO:0005737,GO:0005813,GO:0005829,GO:0006874,GO:…	protein kinase C activity|protein kinase C binding|calcium channel regulator activity|plasma membrane|protein binding|ATP binding|transcription, DNA-templated|intracellular|regulation of transcription by RNA polymerase II|protein phosphorylation|peptidyl-serine phosphorylation|dibenzo-p-dioxin metabolic process|calcium ion transport|ligand-dependent nuclear receptor transcription coactivator acti…	rno04014,rno04015,rno04010,rno04012,rno04310,rno04370,rno04064,rno04066,rno04020,rno04070,rno04071,rno04150,rno04510,rno04540,rno04650,rno04662,rno04666,rno04670,rno04062,rno04911,rno04912,rno04921,rno04918,rno04919,rno04916,rno04925,rno04270,rno04970,rno04971,rno04972,rno04973,rno04960,rno04961,rno04724,rno04727,rno04725,rno04728,rno04726,rno04720,rno04730,rno04723,rno04750,rno04713,rno05200,rno…	Ras signaling pathway|Rap1 signaling pathway|MAPK signaling pathway|ErbB signaling pathway|Wnt signaling pathway|VEGF signaling pathway|NF-kappa B signaling pathway|HIF-1 signaling pathway|Calcium signaling pathway|Phosphatidylinositol signaling system|Sphingolipid signaling pathway|mTOR signaling pathway|Focal adhesion|Gap junction|Natural killer cell mediated cytotoxicity|B cell receptor signal…	rno-Prkcb_0002	http://159.226.67.237:8080/new/circ_detail.php?ID=rno-Prkcb_0002	RNO_CIRCpedia_1853	NM_012713	Prkcb
circRNA_0421|Chr1:192933724_192945931_+	12208	363	sense-overlapping	XM_017590222.1	Chr1:192933264_192965160_+	Rbbp6	GeneID:308968,Genbank:XM_017590222.1,RGD:1311964	RB binding protein 6, ubiquitin ligase, transcript variant X1	GO:0048568,GO:0006275,GO:0061053,GO:0006397,GO:0061630,GO:0006511,GO:0006974,GO:0008270,GO:0016567,GO:0016607,GO:0019901,GO:0032991,GO:0001701,GO:0004842,GO:0035264,GO:0005813	embryonic organ development|regulation of DNA replication|somite development|mRNA processing|ubiquitin protein ligase activity|ubiquitin-dependent protein catabolic process|cellular response to DNA damage stimulus|zinc ion binding|protein ubiquitination|nuclear speck|protein kinase binding|protein-containing complex|in utero embryonic development|ubiquitin-protein transferase activity|multicellul…			rno-Rbbp6_0003	http://159.226.67.237:8080/new/circ_detail.php?ID=rno-Rbbp6_0003
circRNA_0422|Chr1:192952650_192953216_+	567	442	sense-overlapping	XM_017590222.1	Chr1:192933264_192965160_+	Rbbp6	GeneID:308968,Genbank:XM_017590222.1,RGD:1311964	RB binding protein 6, ubiquitin ligase, transcript variant X1	GO:0048568,GO:0006275,GO:0061053,GO:0006397,GO:0061630,GO:0006511,GO:0006974,GO:0008270,GO:0016567,GO:0016607,GO:0019901,GO:0032991,GO:0001701,GO:0004842,GO:0035264,GO:0005813	embryonic organ development|regulation of DNA replication|somite development|mRNA processing|ubiquitin protein ligase activity|ubiquitin-dependent protein catabolic process|cellular response to DNA damage stimulus|zinc ion binding|protein ubiquitination|nuclear speck|protein kinase binding|protein-containing complex|in utero embryonic development|ubiquitin-protein transferase activity|multicellul…			rno-Rbbp6_0001	http://159.226.67.237:8080/new/circ_detail.php?ID=rno-Rbbp6_0001	RNO_CIRCpedia_1856	ENSRNOT00000035770.6	Rbbp6
circRNA_0423|Chr1:192952650_192955267_+	2618	673	sense-overlapping	XM_017590222.1	Chr1:192933264_192965160_+	Rbbp6	GeneID:308968,Genbank:XM_017590222.1,RGD:1311964	RB binding protein 6, ubiquitin ligase, transcript variant X1	GO:0048568,GO:0006275,GO:0061053,GO:0006397,GO:0061630,GO:0006511,GO:0006974,GO:0008270,GO:0016567,GO:0016607,GO:0019901,GO:0032991,GO:0001701,GO:0004842,GO:0035264,GO:0005813	embryonic organ development|regulation of DNA replication|somite development|mRNA processing|ubiquitin protein ligase activity|ubiquitin-dependent protein catabolic process|cellular response to DNA damage stimulus|zinc ion binding|protein ubiquitination|nuclear speck|protein kinase binding|protein-containing complex|in utero embryonic development|ubiquitin-protein transferase activity|multicellul…			rno-Rbbp6_0006	http://159.226.67.237:8080/new/circ_detail.php?ID=rno-Rbbp6_0006	RNO_CIRCpedia_5144	ENSRNOT00000035770.6	Rbbp6
circRNA_0424|Chr1:192954816_192955267_+	452	231	sense-overlapping	XM_017590222.1	Chr1:192933264_192965160_+	Rbbp6	GeneID:308968,Genbank:XM_017590222.1,RGD:1311964	RB binding protein 6, ubiquitin ligase, transcript variant X1	GO:0048568,GO:0006275,GO:0061053,GO:0006397,GO:0061630,GO:0006511,GO:0006974,GO:0008270,GO:0016567,GO:0016607,GO:0019901,GO:0032991,GO:0001701,GO:0004842,GO:0035264,GO:0005813	embryonic organ development|regulation of DNA replication|somite development|mRNA processing|ubiquitin protein ligase activity|ubiquitin-dependent protein catabolic process|cellular response to DNA damage stimulus|zinc ion binding|protein ubiquitination|nuclear speck|protein kinase binding|protein-containing complex|in utero embryonic development|ubiquitin-protein transferase activity|multicellul…			rno-Rbbp6_0007	http://159.226.67.237:8080/new/circ_detail.php?ID=rno-Rbbp6_0007
circRNA_0425|Chr1:194855422_194917768_-	62347	62347	intergenic
circRNA_0426|Chr1:194864350_194917768_-	53419	53419	intergenic
circRNA_0427|Chr1:194917622_194917768_-	147	147	intergenic
circRNA_0428|Chr1:197183957_197187207_+	3251	397	sense-overlapping	XM_006230294.3	Chr1:197098621_197264737_+	LOC361646	GeneID:361646,Genbank:XM_006230294.3,RGD:1595846	similar to K04F10.2, transcript variant X1					rno-LOC361646_0005	http://159.226.67.237:8080/new/circ_detail.php?ID=rno-LOC361646_0005
circRNA_0429|Chr1:197526940_197549861_-	22922	963	sense-overlapping	NM_001011935.2	Chr1:197500509_197590277_-	Xpo6	GeneID:293476,Genbank:NM_001011935.2,RGD:1311491	exportin 6	GO:0005730,GO:0005829,GO:0005886,GO:0006611,GO:0008536,GO:0008565,GO:0005634	nucleolus|cytosol|plasma membrane|protein export from nucleus|Ran GTPase binding|protein transporter activity|nucleus			rno-Xpo6_0002	http://159.226.67.237:8080/new/circ_detail.php?ID=rno-Xpo6_0002
circRNA_0430|Chr1:197536821_197549861_-	13041	691	sense-overlapping	NM_001011935.2	Chr1:197500509_197590277_-	Xpo6	GeneID:293476,Genbank:NM_001011935.2,RGD:1311491	exportin 6	GO:0005730,GO:0005829,GO:0005886,GO:0006611,GO:0008536,GO:0008565,GO:0005634	nucleolus|cytosol|plasma membrane|protein export from nucleus|Ran GTPase binding|protein transporter activity|nucleus			rno-Xpo6_0001	http://159.226.67.237:8080/new/circ_detail.php?ID=rno-Xpo6_0001
circRNA_0431|Chr1:197981834_197982318_-	485	485	sense-overlapping	NM_001100662.1	Chr1:197964406_197982601_-	Eif3c	GeneID:293484,Genbank:NM_001100662.1,RGD:1308871	eukaryotic translation initiation factor 3, subunit C	GO:0071541,GO:0003743,GO:1902416,GO:0005575,GO:0005852,GO:0006413,GO:0008150,GO:0003674,GO:0031369,GO:0045727	eukaryotic translation initiation factor 3 complex, eIF3m|translation initiation factor activity|positive regulation of mRNA binding|cellular_component|eukaryotic translation initiation factor 3 complex|translational initiation|biological_process|molecular_function|translation initiation factor binding|positive regulation of translation	rno03013	RNA transport
circRNA_0432|Chr1:197981834_197983786_-	1953	1841	sense-overlapping	NM_001100662.1	Chr1:197964406_197982601_-	Eif3c	GeneID:293484,Genbank:NM_001100662.1,RGD:1308871	eukaryotic translation initiation factor 3, subunit C	GO:0071541,GO:0003743,GO:1902416,GO:0005575,GO:0005852,GO:0006413,GO:0008150,GO:0003674,GO:0031369,GO:0045727	eukaryotic translation initiation factor 3 complex, eIF3m|translation initiation factor activity|positive regulation of mRNA binding|cellular_component|eukaryotic translation initiation factor 3 complex|translational initiation|biological_process|molecular_function|translation initiation factor binding|positive regulation of translation	rno03013	RNA transport	rno-RF00026_0049	http://159.226.67.237:8080/new/circ_detail.php?ID=rno-RF00026_0049
circRNA_0433|Chr1:197981834_197983858_-	2025	1913	sense-overlapping	NM_001100662.1	Chr1:197964406_197982601_-	Eif3c	GeneID:293484,Genbank:NM_001100662.1,RGD:1308871	eukaryotic translation initiation factor 3, subunit C	GO:0071541,GO:0003743,GO:1902416,GO:0005575,GO:0005852,GO:0006413,GO:0008150,GO:0003674,GO:0031369,GO:0045727	eukaryotic translation initiation factor 3 complex, eIF3m|translation initiation factor activity|positive regulation of mRNA binding|cellular_component|eukaryotic translation initiation factor 3 complex|translational initiation|biological_process|molecular_function|translation initiation factor binding|positive regulation of translation	rno03013	RNA transport
circRNA_0434|Chr1:198089445_198092734_+	3290	246	sense-overlapping	XM_006230232.3	Chr1:198066974_198100494_+	Sgf29	GeneID:293488,Genbank:XM_006230232.3,RGD:1310609	SAGA complex associated factor 29, transcript variant X2	GO:0043966,GO:0005515,GO:0005634,GO:0047485,GO:0005671,GO:0006351,GO:0006355,GO:0070461,GO:0016573,GO:0019899,GO:0035064,GO:0000124,GO:0001135	histone H3 acetylation|protein binding|nucleus|protein N-terminus binding|Ada2/Gcn5/Ada3 transcription activator complex|transcription, DNA-templated|regulation of transcription, DNA-templated|SAGA-type complex|histone acetylation|enzyme binding|methylated histone binding|SAGA complex|transcription factor activity, RNA polymerase II transcription factor recruiting			rno-Sgf29_0001	http://159.226.67.237:8080/new/circ_detail.php?ID=rno-Sgf29_0001
circRNA_0435|Chr1:198314926_198315630_-	705	349	sense-overlapping	XM_006230331.3	Chr1:198301789_198321710_-	Taok2	GeneID:64666,Genbank:XM_006230331.3,RGD:621590	TAO kinase 2, transcript variant X10	GO:0004709,GO:0005524,GO:0005634,GO:0005730,GO:0007409,GO:0008360,GO:0005737,GO:0005829,GO:0015629,GO:0016021,GO:0023014,GO:0032956,GO:0030036,GO:0038191,GO:0030424,GO:0042981,GO:0043005,GO:0043235,GO:0000165,GO:0150019,GO:0000186,GO:0150020,GO:0044294,GO:0004672,GO:0004674,GO:0006468,GO:0006974,GO:0007095,GO:0030659,GO:0007346,GO:0031098,GO:0007399,GO:0031410,GO:0031434,GO:0031572,GO:0044295,GO:…	MAP kinase kinase kinase activity|ATP binding|nucleus|nucleolus|axonogenesis|regulation of cell shape|cytoplasm|cytosol|actin cytoskeleton|integral component of membrane|signal transduction by protein phosphorylation|regulation of actin cytoskeleton organization|actin cytoskeleton organization|neuropilin binding|axon|regulation of apoptotic process|neuron projection|receptor complex|MAPK cascade|…	rno04010	MAPK signaling pathway	rno-Taok2_0004	http://159.226.67.237:8080/new/circ_detail.php?ID=rno-Taok2_0004
circRNA_0436|Chr1:198429807_198432232_-	2426	588	sense-overlapping	XM_017589686.1	Chr1:198420813_198448612_-	Mvp	GeneID:64681,Genbank:XM_017589686.1,RGD:70932	major vault protein, transcript variant X1	GO:0048471,GO:0023057,GO:0005634,GO:0061099,GO:0005737,GO:0031953,GO:0072376,GO:0005829,GO:0005856,GO:0008283,GO:0038127,GO:0019901,GO:0042802,GO:0019903,GO:0005515,GO:0023051	perinuclear region of cytoplasm|negative regulation of signaling|nucleus|negative regulation of protein tyrosine kinase activity|cytoplasm|negative regulation of protein autophosphorylation|protein activation cascade|cytosol|cytoskeleton|cell proliferation|ERBB signaling pathway|protein kinase binding|identical protein binding|protein phosphatase binding|protein binding|regulation of signaling			rno-Mvp_0003	http://159.226.67.237:8080/new/circ_detail.php?ID=rno-Mvp_0003
circRNA_0437|Chr1:198932174_198934500_+	2327	745	sense-overlapping	XM_001080034.5	Chr1:198925265_198938939_+	Fbrs	GeneID:691899,Genbank:XM_001080034.5,RGD:1594591	fibrosin, transcript variant X1	GO:0005615,GO:0008083,GO:0048146	extracellular space|growth factor activity|positive regulation of fibroblast proliferation			rno-Zfp689_0001	http://159.226.67.237:8080/new/circ_detail.php?ID=rno-Zfp689_0001
circRNA_0438|Chr1:198965547_198968419_+	2873	579	sense-overlapping	XM_017590232.1	Chr1:198957764_199007576_+	Srcap	GeneID:361652,Genbank:XM_017590232.1,RGD:1565642	Snf2-related CREBBP activator protein, transcript variant X1	GO:0005575,GO:0005634,GO:0005654,GO:0005794,GO:0008150,GO:0016604,GO:0032991,GO:0048471,GO:0003674,GO:0003677,GO:0005524	cellular_component|nucleus|nucleoplasm|Golgi apparatus|biological_process|nuclear body|protein-containing complex|perinuclear region of cytoplasm|molecular_function|DNA binding|ATP binding			rno-Srcap_0004	http://159.226.67.237:8080/new/circ_detail.php?ID=rno-Srcap_0004
circRNA_0439|Chr1:198965547_198972343_+	6797	1077	sense-overlapping	XM_017590232.1	Chr1:198957764_199007576_+	Srcap	GeneID:361652,Genbank:XM_017590232.1,RGD:1565642	Snf2-related CREBBP activator protein, transcript variant X1	GO:0005575,GO:0005634,GO:0005654,GO:0005794,GO:0008150,GO:0016604,GO:0032991,GO:0048471,GO:0003674,GO:0003677,GO:0005524	cellular_component|nucleus|nucleoplasm|Golgi apparatus|biological_process|nuclear body|protein-containing complex|perinuclear region of cytoplasm|molecular_function|DNA binding|ATP binding			rno-Srcap_0011	http://159.226.67.237:8080/new/circ_detail.php?ID=rno-Srcap_0011	RNO_CIRCpedia_7584	ENSRNOT00000072389.2	Srcap
circRNA_0440|Chr1:198967641_198972343_+	4703	825	sense-overlapping	XM_017590232.1	Chr1:198957764_199007576_+	Srcap	GeneID:361652,Genbank:XM_017590232.1,RGD:1565642	Snf2-related CREBBP activator protein, transcript variant X1	GO:0005575,GO:0005634,GO:0005654,GO:0005794,GO:0008150,GO:0016604,GO:0032991,GO:0048471,GO:0003674,GO:0003677,GO:0005524	cellular_component|nucleus|nucleoplasm|Golgi apparatus|biological_process|nuclear body|protein-containing complex|perinuclear region of cytoplasm|molecular_function|DNA binding|ATP binding			rno-Srcap_0009	http://159.226.67.237:8080/new/circ_detail.php?ID=rno-Srcap_0009	RNO_CIRCpedia_1859	ENSRNOT00000072389.2	Srcap
circRNA_0441|Chr1:198994747_198995342_+	596	469	sense-overlapping	XM_017590232.1	Chr1:198957764_199007576_+	Srcap	GeneID:361652,Genbank:XM_017590232.1,RGD:1565642	Snf2-related CREBBP activator protein, transcript variant X1	GO:0005575,GO:0005634,GO:0005654,GO:0005794,GO:0008150,GO:0016604,GO:0032991,GO:0048471,GO:0003674,GO:0003677,GO:0005524	cellular_component|nucleus|nucleoplasm|Golgi apparatus|biological_process|nuclear body|protein-containing complex|perinuclear region of cytoplasm|molecular_function|DNA binding|ATP binding			rno-Srcap_0001	http://159.226.67.237:8080/new/circ_detail.php?ID=rno-Srcap_0001	RNO_CIRCpedia_1861	ENSRNOT00000072389.2	Srcap
circRNA_0442|Chr1:199167406_199167602_-	197	197	antisense	XM_006230221.3	Chr1:199162319_199168296_+	Ctf1	GeneID:29201,Genbank:XM_006230221.3,RGD:2442	cardiotrophin 1, transcript variant X1	GO:0005146,GO:0005576,GO:0005615,GO:0006955,GO:0007166,GO:0007399,GO:0010469,GO:0042531,GO:0048666,GO:0048861,GO:0005125	leukemia inhibitory factor receptor binding|extracellular region|extracellular space|immune response|cell surface receptor signaling pathway|nervous system development|regulation of signaling receptor activity|positive regulation of tyrosine phosphorylation of STAT protein|neuron development|leukemia inhibitory factor signaling pathway|cytokine activity	rno04630,rno04060	Jak-STAT signaling pathway|Cytokine-cytokine receptor interaction
circRNA_0443|Chr1:199846437_199847539_-	1103	445	sense-overlapping	NM_001013193.1	Chr1:199844854_199865548_-	Tial1	GeneID:361655,Genbank:NM_001013193.1,RGD:1595845	Tia1 cytotoxic granule-associated RNA binding protein-like 1	GO:0005634,GO:0005737,GO:0007281,GO:0008150,GO:0008284,GO:0010494,GO:0017091,GO:0017145,GO:0003674,GO:0003677	nucleus|cytoplasm|germ cell development|biological_process|positive regulation of cell proliferation|cytoplasmic stress granule|AU-rich element binding|stem cell division|molecular_function|DNA binding			rno-Tial1_0011	http://159.226.67.237:8080/new/circ_detail.php?ID=rno-Tial1_0011
circRNA_0444|Chr1:200099950_200105174_+	5225	446	sense-overlapping	NM_001107554.1	Chr1:200037749_200116524_+	Inpp5f	GeneID:309008,Genbank:NM_001107554.1,RGD:1305777	inositol polyphosphate-5-phosphatase F	GO:0051898,GO:0042532,GO:0005737,GO:0052833,GO:0042803,GO:0005769,GO:0055037,GO:0043025,GO:0005905,GO:0072583,GO:0008150,GO:0008344,GO:0014898,GO:0030424,GO:0045334,GO:0030425,GO:2000145,GO:0046627,GO:0031161,GO:2001135,GO:0046856,GO:0033137,GO:0048015,GO:0034595,GO:0001921,GO:0048681,GO:0003674,GO:0051896,GO:0034596,GO:0005575	negative regulation of protein kinase B signaling|negative regulation of tyrosine phosphorylation of STAT protein|cytoplasm|inositol monophosphate 4-phosphatase activity|protein homodimerization activity|early endosome|recycling endosome|neuronal cell body|clathrin-coated pit|clathrin-dependent endocytosis|biological_process|adult locomotory behavior|cardiac muscle hypertrophy in response to stre…	rno00562,rno04070	Inositol phosphate metabolism|Phosphatidylinositol signaling system	rno-Inpp5f_0001	http://159.226.67.237:8080/new/circ_detail.php?ID=rno-Inpp5f_0001
circRNA_0445|Chr1:200102205_200105174_+	2970	317	sense-overlapping	NM_001107554.1	Chr1:200037749_200116524_+	Inpp5f	GeneID:309008,Genbank:NM_001107554.1,RGD:1305777	inositol polyphosphate-5-phosphatase F	GO:0051898,GO:0042532,GO:0005737,GO:0052833,GO:0042803,GO:0005769,GO:0055037,GO:0043025,GO:0005905,GO:0072583,GO:0008150,GO:0008344,GO:0014898,GO:0030424,GO:0045334,GO:0030425,GO:2000145,GO:0046627,GO:0031161,GO:2001135,GO:0046856,GO:0033137,GO:0048015,GO:0034595,GO:0001921,GO:0048681,GO:0003674,GO:0051896,GO:0034596,GO:0005575	negative regulation of protein kinase B signaling|negative regulation of tyrosine phosphorylation of STAT protein|cytoplasm|inositol monophosphate 4-phosphatase activity|protein homodimerization activity|early endosome|recycling endosome|neuronal cell body|clathrin-coated pit|clathrin-dependent endocytosis|biological_process|adult locomotory behavior|cardiac muscle hypertrophy in response to stre…	rno00562,rno04070	Inositol phosphate metabolism|Phosphatidylinositol signaling system	rno-Inpp5f_0002	http://159.226.67.237:8080/new/circ_detail.php?ID=rno-Inpp5f_0002	RNO_CIRCpedia_8423	NM_001107554	Inpp5f
circRNA_0446|Chr1:200121752_200124294_-	2543	465	sense-overlapping	NM_001039608.2	Chr1:200118226_200163106_-	Mcmbp	GeneID:309009,Genbank:NM_001039608.2,RGD:1306730	minichromosome maintenance complex binding protein	GO:0007062,GO:0003682,GO:0005634,GO:0042555,GO:0005654,GO:0005829,GO:0005886,GO:0051301,GO:0006261,GO:0000790	sister chromatid cohesion|chromatin binding|nucleus|MCM complex|nucleoplasm|cytosol|plasma membrane|cell division|DNA-dependent DNA replication|nuclear chromatin			rno-Mcmbp_0001	http://159.226.67.237:8080/new/circ_detail.php?ID=rno-Mcmbp_0001	RNO_CIRCpedia_1864	NM_001039608	Mcmbp
circRNA_0447|Chr1:200606971_200615170_-	8200	576	sense-overlapping	XM_008759861.2	Chr1:200590951_200677146_-	Fgfr2	GeneID:25022,Genbank:XM_008759861.2,RGD:2611	fibroblast growth factor receptor 2, transcript variant X4	GO:0048701,GO:0048730,GO:0048755,GO:0048762,GO:0003416,GO:0050673,GO:0004709,GO:0050678,GO:0004713,GO:0050679,GO:0004714,GO:0060449,GO:0050680,GO:0004871,GO:0060463,GO:0051150,GO:0004888,GO:0060484,GO:0051781,GO:0005007,GO:0060501,GO:0005938,GO:0060512,GO:0007267,GO:0060523,GO:0007275,GO:0060527,GO:0007409,GO:0070372,GO:0060529,GO:0007417,GO:0070374,GO:0060595,GO:0007528,GO:0060601,GO:0008284,GO:…	embryonic cranial skeleton morphogenesis|epidermis morphogenesis|branching morphogenesis of a nerve|mesenchymal cell differentiation|endochondral bone growth|epithelial cell proliferation|MAP kinase kinase kinase activity|regulation of epithelial cell proliferation|protein tyrosine kinase activity|positive regulation of epithelial cell proliferation|transmembrane receptor protein tyrosine kinase …	rno04014,rno04015,rno04010,rno04151,rno04144,rno04550,rno04810,rno05200,rno05230,rno05226,rno05215,rno01521	Ras signaling pathway|Rap1 signaling pathway|MAPK signaling pathway|PI3K-Akt signaling pathway|Endocytosis|Signaling pathways regulating pluripotency of stem cells|Regulation of actin cytoskeleton|Pathways in cancer|Central carbon metabolism in cancer|Gastric cancer|Prostate cancer|EGFR tyrosine kinase inhibitor resistance	rno-Fgfr2_0011	http://159.226.67.237:8080/new/circ_detail.php?ID=rno-Fgfr2_0011
circRNA_0448|Chr1:200648164_200658087_-	9924	294	sense-overlapping	XM_008759861.2	Chr1:200590951_200677146_-	Fgfr2	GeneID:25022,Genbank:XM_008759861.2,RGD:2611	fibroblast growth factor receptor 2, transcript variant X4	GO:0048701,GO:0048730,GO:0048755,GO:0048762,GO:0003416,GO:0050673,GO:0004709,GO:0050678,GO:0004713,GO:0050679,GO:0004714,GO:0060449,GO:0050680,GO:0004871,GO:0060463,GO:0051150,GO:0004888,GO:0060484,GO:0051781,GO:0005007,GO:0060501,GO:0005938,GO:0060512,GO:0007267,GO:0060523,GO:0007275,GO:0060527,GO:0007409,GO:0070372,GO:0060529,GO:0007417,GO:0070374,GO:0060595,GO:0007528,GO:0060601,GO:0008284,GO:…	embryonic cranial skeleton morphogenesis|epidermis morphogenesis|branching morphogenesis of a nerve|mesenchymal cell differentiation|endochondral bone growth|epithelial cell proliferation|MAP kinase kinase kinase activity|regulation of epithelial cell proliferation|protein tyrosine kinase activity|positive regulation of epithelial cell proliferation|transmembrane receptor protein tyrosine kinase …	rno04014,rno04015,rno04010,rno04151,rno04144,rno04550,rno04810,rno05200,rno05230,rno05226,rno05215,rno01521	Ras signaling pathway|Rap1 signaling pathway|MAPK signaling pathway|PI3K-Akt signaling pathway|Endocytosis|Signaling pathways regulating pluripotency of stem cells|Regulation of actin cytoskeleton|Pathways in cancer|Central carbon metabolism in cancer|Gastric cancer|Prostate cancer|EGFR tyrosine kinase inhibitor resistance	rno-Fgfr2_0002	http://159.226.67.237:8080/new/circ_detail.php?ID=rno-Fgfr2_0002	RNO_CIRCpedia_1867	NM_001109892	Fgfr2
circRNA_0449|Chr1:200648164_200671090_-	22927	372	sense-overlapping	XM_008759861.2	Chr1:200590951_200677146_-	Fgfr2	GeneID:25022,Genbank:XM_008759861.2,RGD:2611	fibroblast growth factor receptor 2, transcript variant X4	GO:0048701,GO:0048730,GO:0048755,GO:0048762,GO:0003416,GO:0050673,GO:0004709,GO:0050678,GO:0004713,GO:0050679,GO:0004714,GO:0060449,GO:0050680,GO:0004871,GO:0060463,GO:0051150,GO:0004888,GO:0060484,GO:0051781,GO:0005007,GO:0060501,GO:0005938,GO:0060512,GO:0007267,GO:0060523,GO:0007275,GO:0060527,GO:0007409,GO:0070372,GO:0060529,GO:0007417,GO:0070374,GO:0060595,GO:0007528,GO:0060601,GO:0008284,GO:…	embryonic cranial skeleton morphogenesis|epidermis morphogenesis|branching morphogenesis of a nerve|mesenchymal cell differentiation|endochondral bone growth|epithelial cell proliferation|MAP kinase kinase kinase activity|regulation of epithelial cell proliferation|protein tyrosine kinase activity|positive regulation of epithelial cell proliferation|transmembrane receptor protein tyrosine kinase …	rno04014,rno04015,rno04010,rno04151,rno04144,rno04550,rno04810,rno05200,rno05230,rno05226,rno05215,rno01521	Ras signaling pathway|Rap1 signaling pathway|MAPK signaling pathway|PI3K-Akt signaling pathway|Endocytosis|Signaling pathways regulating pluripotency of stem cells|Regulation of actin cytoskeleton|Pathways in cancer|Central carbon metabolism in cancer|Gastric cancer|Prostate cancer|EGFR tyrosine kinase inhibitor resistance	rno-Fgfr2_0004	http://159.226.67.237:8080/new/circ_detail.php?ID=rno-Fgfr2_0004	RNO_CIRCpedia_1868	NM_001109892	Fgfr2
circRNA_0450|Chr1:200648164_200672411_-	24248	639	sense-overlapping	XM_008759861.2	Chr1:200590951_200677146_-	Fgfr2	GeneID:25022,Genbank:XM_008759861.2,RGD:2611	fibroblast growth factor receptor 2, transcript variant X4	GO:0048701,GO:0048730,GO:0048755,GO:0048762,GO:0003416,GO:0050673,GO:0004709,GO:0050678,GO:0004713,GO:0050679,GO:0004714,GO:0060449,GO:0050680,GO:0004871,GO:0060463,GO:0051150,GO:0004888,GO:0060484,GO:0051781,GO:0005007,GO:0060501,GO:0005938,GO:0060512,GO:0007267,GO:0060523,GO:0007275,GO:0060527,GO:0007409,GO:0070372,GO:0060529,GO:0007417,GO:0070374,GO:0060595,GO:0007528,GO:0060601,GO:0008284,GO:…	embryonic cranial skeleton morphogenesis|epidermis morphogenesis|branching morphogenesis of a nerve|mesenchymal cell differentiation|endochondral bone growth|epithelial cell proliferation|MAP kinase kinase kinase activity|regulation of epithelial cell proliferation|protein tyrosine kinase activity|positive regulation of epithelial cell proliferation|transmembrane receptor protein tyrosine kinase …	rno04014,rno04015,rno04010,rno04151,rno04144,rno04550,rno04810,rno05200,rno05230,rno05226,rno05215,rno01521	Ras signaling pathway|Rap1 signaling pathway|MAPK signaling pathway|PI3K-Akt signaling pathway|Endocytosis|Signaling pathways regulating pluripotency of stem cells|Regulation of actin cytoskeleton|Pathways in cancer|Central carbon metabolism in cancer|Gastric cancer|Prostate cancer|EGFR tyrosine kinase inhibitor resistance	rno-Fgfr2_0001	http://159.226.67.237:8080/new/circ_detail.php?ID=rno-Fgfr2_0001	RNO_CIRCpedia_1869	NM_001109892	Fgfr2
circRNA_0451|Chr1:200671013_200672411_-	1399	345	sense-overlapping	XM_008759861.2	Chr1:200590951_200677146_-	Fgfr2	GeneID:25022,Genbank:XM_008759861.2,RGD:2611	fibroblast growth factor receptor 2, transcript variant X4	GO:0048701,GO:0048730,GO:0048755,GO:0048762,GO:0003416,GO:0050673,GO:0004709,GO:0050678,GO:0004713,GO:0050679,GO:0004714,GO:0060449,GO:0050680,GO:0004871,GO:0060463,GO:0051150,GO:0004888,GO:0060484,GO:0051781,GO:0005007,GO:0060501,GO:0005938,GO:0060512,GO:0007267,GO:0060523,GO:0007275,GO:0060527,GO:0007409,GO:0070372,GO:0060529,GO:0007417,GO:0070374,GO:0060595,GO:0007528,GO:0060601,GO:0008284,GO:…	embryonic cranial skeleton morphogenesis|epidermis morphogenesis|branching morphogenesis of a nerve|mesenchymal cell differentiation|endochondral bone growth|epithelial cell proliferation|MAP kinase kinase kinase activity|regulation of epithelial cell proliferation|protein tyrosine kinase activity|positive regulation of epithelial cell proliferation|transmembrane receptor protein tyrosine kinase …	rno04014,rno04015,rno04010,rno04151,rno04144,rno04550,rno04810,rno05200,rno05230,rno05226,rno05215,rno01521	Ras signaling pathway|Rap1 signaling pathway|MAPK signaling pathway|PI3K-Akt signaling pathway|Endocytosis|Signaling pathways regulating pluripotency of stem cells|Regulation of actin cytoskeleton|Pathways in cancer|Central carbon metabolism in cancer|Gastric cancer|Prostate cancer|EGFR tyrosine kinase inhibitor resistance	rno-Fgfr2_0003	http://159.226.67.237:8080/new/circ_detail.php?ID=rno-Fgfr2_0003	RNO_CIRCpedia_9467	NM_001109892	Fgfr2
circRNA_0452|Chr1:201097034_201101897_-	4864	4864	intergenic										rno-Nsmce4a_0002	http://159.226.67.237:8080/new/circ_detail.php?ID=rno-Nsmce4a_0002
circRNA_0453|Chr1:201183051_201188802_+	5752	5217	sense-overlapping	XM_017589221.1	Chr1:201140264_201329612_+	Tacc2	GeneID:309025,Genbank:XM_017589221.1,RGD:1303004	transforming, acidic coiled-coil containing protein 2, transcript variant X1	GO:0022008,GO:0005654,GO:0022027,GO:0030953,GO:0005737,GO:0005829,GO:0005886,GO:0032886,GO:0008283,GO:0035257,GO:0015630,GO:0019904,GO:0000226,GO:0021987,GO:0005622	neurogenesis|nucleoplasm|interkinetic nuclear migration|astral microtubule organization|cytoplasm|cytosol|plasma membrane|regulation of microtubule-based process|cell proliferation|nuclear hormone receptor binding|microtubule cytoskeleton|protein domain specific binding|microtubule cytoskeleton organization|cerebral cortex development|intracellular			rno-Tacc2_0003	http://159.226.67.237:8080/new/circ_detail.php?ID=rno-Tacc2_0003
circRNA_0454|Chr1:201438446_201451005_+	12560	393	sense-overlapping	XM_017589426.1	Chr1:201429717_201481411_+	Plekha1	GeneID:361659,Genbank:XM_017589426.1,RGD:1564153	pleckstrin homology domain containing A1, transcript variant X2	GO:0070301,GO:0035264,GO:0009791,GO:0005634,GO:0043325,GO:0014065,GO:0005654,GO:0045184,GO:0016020,GO:0048008,GO:0005737,GO:0005829,GO:0030165,GO:0005886,GO:0048705,GO:0007283,GO:0050853,GO:0031529,GO:0008150,GO:0051898,GO:0032587,GO:0008209,GO:0001553,GO:0060021,GO:0033327,GO:0008210,GO:0003674,GO:0060325,GO:0035091,GO:0008585,GO:0005575	cellular response to hydrogen peroxide|multicellular organism growth|post-embryonic development|nucleus|phosphatidylinositol-3,4-bisphosphate binding|phosphatidylinositol 3-kinase signaling|nucleoplasm|establishment of protein localization|membrane|platelet-derived growth factor receptor signaling pathway|cytoplasm|cytosol|PDZ domain binding|plasma membrane|skeletal system morphogenesis|spermatog…			rno-Plekha1_0012	http://159.226.67.237:8080/new/circ_detail.php?ID=rno-Plekha1_0012
circRNA_0455|Chr1:201442093_201447986_+	5894	218	sense-overlapping	XM_006230415.3	Chr1:201429716_201478489_+	Plekha1	GeneID:361659,Genbank:XM_006230415.3,RGD:1564153	pleckstrin homology domain containing A1, transcript variant X7	GO:0070301,GO:0035264,GO:0009791,GO:0005634,GO:0043325,GO:0014065,GO:0005654,GO:0045184,GO:0016020,GO:0048008,GO:0005737,GO:0005829,GO:0030165,GO:0005886,GO:0048705,GO:0007283,GO:0050853,GO:0031529,GO:0008150,GO:0051898,GO:0032587,GO:0008209,GO:0001553,GO:0060021,GO:0033327,GO:0008210,GO:0003674,GO:0060325,GO:0035091,GO:0008585,GO:0005575	cellular response to hydrogen peroxide|multicellular organism growth|post-embryonic development|nucleus|phosphatidylinositol-3,4-bisphosphate binding|phosphatidylinositol 3-kinase signaling|nucleoplasm|establishment of protein localization|membrane|platelet-derived growth factor receptor signaling pathway|cytoplasm|cytosol|PDZ domain binding|plasma membrane|skeletal system morphogenesis|spermatog…			rno-Plekha1_0006	http://159.226.67.237:8080/new/circ_detail.php?ID=rno-Plekha1_0006
circRNA_0456|Chr1:201442093_201451005_+	8913	264	sense-overlapping	XM_006230415.3	Chr1:201429716_201478489_+	Plekha1	GeneID:361659,Genbank:XM_006230415.3,RGD:1564153	pleckstrin homology domain containing A1, transcript variant X7	GO:0070301,GO:0035264,GO:0009791,GO:0005634,GO:0043325,GO:0014065,GO:0005654,GO:0045184,GO:0016020,GO:0048008,GO:0005737,GO:0005829,GO:0030165,GO:0005886,GO:0048705,GO:0007283,GO:0050853,GO:0031529,GO:0008150,GO:0051898,GO:0032587,GO:0008209,GO:0001553,GO:0060021,GO:0033327,GO:0008210,GO:0003674,GO:0060325,GO:0035091,GO:0008585,GO:0005575	cellular response to hydrogen peroxide|multicellular organism growth|post-embryonic development|nucleus|phosphatidylinositol-3,4-bisphosphate binding|phosphatidylinositol 3-kinase signaling|nucleoplasm|establishment of protein localization|membrane|platelet-derived growth factor receptor signaling pathway|cytoplasm|cytosol|PDZ domain binding|plasma membrane|skeletal system morphogenesis|spermatog…			rno-Plekha1_0005	http://159.226.67.237:8080/new/circ_detail.php?ID=rno-Plekha1_0005	RNO_CIRCpedia_5147	ENSRNOT00000027836.4	Plekha1
circRNA_0457|Chr1:201523375_201524041_+	667	305	sense-overlapping	NM_031721.1	Chr1:201499067_201548508_+	Htra1	GeneID:65164,Genbank:NM_031721.1,RGD:69235	HtrA serine peptidase 1	GO:0031012,GO:0005520,GO:0042802,GO:0005615,GO:0050679,GO:0005829,GO:0005886,GO:0006508,GO:0050687,GO:0008236,GO:0060718,GO:0097187,GO:0030512,GO:0030514,GO:0001558,GO:0001890,GO:0004252	extracellular matrix|insulin-like growth factor binding|identical protein binding|extracellular space|positive regulation of epithelial cell proliferation|cytosol|plasma membrane|proteolysis|negative regulation of defense response to virus|serine-type peptidase activity|chorionic trophoblast cell differentiation|dentinogenesis|negative regulation of transforming growth factor beta receptor signal…			rno-Htra1_0001	http://159.226.67.237:8080/new/circ_detail.php?ID=rno-Htra1_0001	RNO_CIRCpedia_1871	ENSRNOT00000027860.4	Htra1
circRNA_0458|Chr1:201523380_201524041_+	662	300	sense-overlapping	NM_031721.1	Chr1:201499067_201548508_+	Htra1	GeneID:65164,Genbank:NM_031721.1,RGD:69235	HtrA serine peptidase 1	GO:0031012,GO:0005520,GO:0042802,GO:0005615,GO:0050679,GO:0005829,GO:0005886,GO:0006508,GO:0050687,GO:0008236,GO:0060718,GO:0097187,GO:0030512,GO:0030514,GO:0001558,GO:0001890,GO:0004252	extracellular matrix|insulin-like growth factor binding|identical protein binding|extracellular space|positive regulation of epithelial cell proliferation|cytosol|plasma membrane|proteolysis|negative regulation of defense response to virus|serine-type peptidase activity|chorionic trophoblast cell differentiation|dentinogenesis|negative regulation of transforming growth factor beta receptor signal…
circRNA_0459|Chr1:202000512_202004497_+	3986	468	sense-overlapping	XM_008759867.2	Chr1:201981362_202019882_+	Acadsb	GeneID:25618,Genbank:XM_008759867.2,RGD:2013	acyl-CoA dehydrogenase, short/branched chain, transcript variant X3	GO:0005739,GO:0005759,GO:0006631,GO:0006635,GO:0006637,GO:0009055,GO:0016937,GO:0022900,GO:0050660,GO:0003995,GO:0055114	mitochondrion|mitochondrial matrix|fatty acid metabolic process|fatty acid beta-oxidation|acyl-CoA metabolic process|electron transfer activity|short-branched-chain-acyl-CoA dehydrogenase activity|electron transport chain|flavin adenine dinucleotide binding|acyl-CoA dehydrogenase activity|oxidation-reduction process	rno00071,rno00280	Fatty acid degradation|Valine, leucine and isoleucine degradation	rno-Acadsb_0001	http://159.226.67.237:8080/new/circ_detail.php?ID=rno-Acadsb_0001	RNO_CIRCpedia_6559	ENSRNOT00000027999.4	Acadsb
circRNA_0460|Chr1:203266064_203295207_+	29144	1773	sense-overlapping	XM_017590238.1	Chr1:203260622_203381994_+	LOC100911413	GeneID:100911413,Genbank:XM_017590238.1,RGD:6493252	deleted in malignant brain tumors 1 protein-like, transcript variant X1
circRNA_0461|Chr1:203272587_203275516_+	2930	648	sense-overlapping	XM_017590238.1	Chr1:203260622_203381994_+	LOC100911413	GeneID:100911413,Genbank:XM_017590238.1,RGD:6493252	deleted in malignant brain tumors 1 protein-like, transcript variant X1
circRNA_0462|Chr1:203272587_203286711_+	14125	768	sense-overlapping	XM_017590238.1	Chr1:203260622_203381994_+	LOC100911413	GeneID:100911413,Genbank:XM_017590238.1,RGD:6493252	deleted in malignant brain tumors 1 protein-like, transcript variant X1
circRNA_0463|Chr1:203279889_203286220_+	6332	60	sense-overlapping	XM_017590238.1	Chr1:203260622_203381994_+	LOC100911413	GeneID:100911413,Genbank:XM_017590238.1,RGD:6493252	deleted in malignant brain tumors 1 protein-like, transcript variant X1
circRNA_0464|Chr1:203279889_203317455_+	37567	500	sense-overlapping	XM_017590238.1	Chr1:203260622_203381994_+	LOC100911413	GeneID:100911413,Genbank:XM_017590238.1,RGD:6493252	deleted in malignant brain tumors 1 protein-like, transcript variant X1					rno-intergenic_000332	http://159.226.67.237:8080/new/circ_detail.php?ID=rno-intergenic_000332
circRNA_0465|Chr1:203286194_203299256_+	13063	4985	sense-overlapping	XM_017590238.1	Chr1:203260622_203381994_+	LOC100911413	GeneID:100911413,Genbank:XM_017590238.1,RGD:6493252	deleted in malignant brain tumors 1 protein-like, transcript variant X1
circRNA_0466|Chr1:203286679_203317455_+	30777	440	sense-overlapping	XM_017590238.1	Chr1:203260622_203381994_+	LOC100911413	GeneID:100911413,Genbank:XM_017590238.1,RGD:6493252	deleted in malignant brain tumors 1 protein-like, transcript variant X1					rno-intergenic_000313	http://159.226.67.237:8080/new/circ_detail.php?ID=rno-intergenic_000313
circRNA_0467|Chr1:203293859_203382217_+	88359	1453	sense-overlapping	XM_017590238.1	Chr1:203260622_203381994_+	LOC100911413	GeneID:100911413,Genbank:XM_017590238.1,RGD:6493252	deleted in malignant brain tumors 1 protein-like, transcript variant X1
circRNA_0468|Chr1:203294332_203299256_+	4925	4925	sense-overlapping	XM_017590238.1	Chr1:203260622_203381994_+	LOC100911413	GeneID:100911413,Genbank:XM_017590238.1,RGD:6493252	deleted in malignant brain tumors 1 protein-like, transcript variant X1
circRNA_0469|Chr1:203294332_203343429_+	49098	26381	sense-overlapping	XM_017590238.1	Chr1:203260622_203381994_+	LOC100911413	GeneID:100911413,Genbank:XM_017590238.1,RGD:6493252	deleted in malignant brain tumors 1 protein-like, transcript variant X1
circRNA_0470|Chr1:203343400_203385990_+	42591	7178	sense-overlapping	XM_017590238.1	Chr1:203260622_203381994_+	LOC100911413	GeneID:100911413,Genbank:XM_017590238.1,RGD:6493252	deleted in malignant brain tumors 1 protein-like, transcript variant X1					rno-intergenic_000264	http://159.226.67.237:8080/new/circ_detail.php?ID=rno-intergenic_000264
circRNA_0471|Chr1:204114121_204133862_-	19742	250	sense-overlapping	NM_001106306.1	Chr1:204048785_204161090_-	Cpxm2	GeneID:293566,Genbank:NM_001106306.1,RGD:1310955	carboxypeptidase X (M14 family), member 2	GO:0005615,GO:0006508,GO:0006518,GO:0016485,GO:0031012,GO:0004180,GO:0004181	extracellular space|proteolysis|peptide metabolic process|protein processing|extracellular matrix|carboxypeptidase activity|metallocarboxypeptidase activity			rno-intergenic_009541	http://159.226.67.237:8080/new/circ_detail.php?ID=rno-intergenic_009541
circRNA_0472|Chr1:204114121_204149302_-	35182	349	sense-overlapping	NM_001106306.1	Chr1:204048785_204161090_-	Cpxm2	GeneID:293566,Genbank:NM_001106306.1,RGD:1310955	carboxypeptidase X (M14 family), member 2	GO:0005615,GO:0006508,GO:0006518,GO:0016485,GO:0031012,GO:0004180,GO:0004181	extracellular space|proteolysis|peptide metabolic process|protein processing|extracellular matrix|carboxypeptidase activity|metallocarboxypeptidase activity			rno-intergenic_000946	http://159.226.67.237:8080/new/circ_detail.php?ID=rno-intergenic_000946
circRNA_0473|Chr1:204267319_204275972_-	8654	1635	sense-overlapping	XM_017588846.1	Chr1:204243396_204288432_-	Chst15	GeneID:286974,Genbank:XM_017588846.1,RGD:628881	carbohydrate (N-acetylgalactosamine 4-sulfate 6-O) sulfotransferase 15, transcript variant X5	GO:0019319,GO:0050656,GO:0050659,GO:0000139,GO:0016021	hexose biosynthetic process|3'-phosphoadenosine 5'-phosphosulfate binding|N-acetylgalactosamine 4-sulfate 6-O-sulfotransferase activity|Golgi membrane|integral component of membrane	rno00532	Glycosaminoglycan biosynthesis - chondroitin sulfate / dermatan sulfate	rno-Chst15_0002	http://159.226.67.237:8080/new/circ_detail.php?ID=rno-Chst15_0002	RNO_CIRCpedia_1874	ENSRNOT00000022157.7	Chst15
circRNA_0474|Chr1:204761727_204780713_-	18987	1090	sense-overlapping	NM_001107556.1	Chr1:204714473_204805738_-	Fam53b	GeneID:309060,Genbank:NM_001107556.1,RGD:1310799	family with sequence similarity 53, member B	GO:0005634,GO:0060828,GO:0090263	nucleus|regulation of canonical Wnt signaling pathway|positive regulation of canonical Wnt signaling pathway			rno-Fam53b_0003	http://159.226.67.237:8080/new/circ_detail.php?ID=rno-Fam53b_0003	RNO_CIRCpedia_1876	NM_001107556	Fam53b
circRNA_0475|Chr1:204773090_204780713_-	7624	311	sense-overlapping	NM_001107556.1	Chr1:204714473_204805738_-	Fam53b	GeneID:309060,Genbank:NM_001107556.1,RGD:1310799	family with sequence similarity 53, member B	GO:0005634,GO:0060828,GO:0090263	nucleus|regulation of canonical Wnt signaling pathway|positive regulation of canonical Wnt signaling pathway			rno-Fam53b_0004	http://159.226.67.237:8080/new/circ_detail.php?ID=rno-Fam53b_0004	RNO_CIRCpedia_8425	NM_001107556	Fam53b
circRNA_0476|Chr1:204830814_204842017_-	11204	1431	sense-overlapping	XM_017589430.1	Chr1:204831534_204855246_-	Mettl10	GeneID:361664,Genbank:XM_017589430.1,RGD:1306300	methyltransferase like 10, transcript variant X5	GO:0016279,GO:0018022,GO:0005634,GO:0005737,GO:0008168	protein-lysine N-methyltransferase activity|peptidyl-lysine methylation|nucleus|cytoplasm|methyltransferase activity			rno-Eef1akmt2_0004	http://159.226.67.237:8080/new/circ_detail.php?ID=rno-Eef1akmt2_0004
circRNA_0477|Chr1:204831740_204842017_-	10278	505	sense-overlapping	XM_017589430.1	Chr1:204831534_204855246_-	Mettl10	GeneID:361664,Genbank:XM_017589430.1,RGD:1306300	methyltransferase like 10, transcript variant X5	GO:0016279,GO:0018022,GO:0005634,GO:0005737,GO:0008168	protein-lysine N-methyltransferase activity|peptidyl-lysine methylation|nucleus|cytoplasm|methyltransferase activity			rno-Eef1akmt2_0003	http://159.226.67.237:8080/new/circ_detail.php?ID=rno-Eef1akmt2_0003
circRNA_0478|Chr1:204958606_204961691_+	3086	1100	sense-overlapping	XM_008759960.2	Chr1:204958582_205000163_+	Zranb1	GeneID:100360606,Genbank:XM_008759960.2,RGD:2321751	zinc finger RANBP2-type containing 1, transcript variant X1	GO:0071947,GO:0030177,GO:0005634,GO:0035523,GO:0005654,GO:1990168,GO:0005737,GO:0005829,GO:0036459,GO:0007010,GO:0043231,GO:0046872,GO:0016477,GO:0070530,GO:0004843,GO:0022604,GO:0070536	protein deubiquitination involved in ubiquitin-dependent protein catabolic process|positive regulation of Wnt signaling pathway|nucleus|protein K29-linked deubiquitination|nucleoplasm|protein K33-linked deubiquitination|cytoplasm|cytosol|thiol-dependent ubiquitinyl hydrolase activity|cytoskeleton organization|intracellular membrane-bounded organelle|metal ion binding|cell migration|K63-linked pol…			rno-Zranb1_0023	http://159.226.67.237:8080/new/circ_detail.php?ID=rno-Zranb1_0023
circRNA_0479|Chr1:204959155_204961691_+	2537	1034	sense-overlapping	XM_006230445.3	Chr1:204938444_205000163_+	Zranb1	GeneID:100360606,Genbank:XM_006230445.3,RGD:2321751	zinc finger RANBP2-type containing 1, transcript variant X2	GO:0071947,GO:0030177,GO:0005634,GO:0035523,GO:0005654,GO:1990168,GO:0005737,GO:0005829,GO:0036459,GO:0007010,GO:0043231,GO:0046872,GO:0016477,GO:0070530,GO:0004843,GO:0022604,GO:0070536	protein deubiquitination involved in ubiquitin-dependent protein catabolic process|positive regulation of Wnt signaling pathway|nucleus|protein K29-linked deubiquitination|nucleoplasm|protein K33-linked deubiquitination|cytoplasm|cytosol|thiol-dependent ubiquitinyl hydrolase activity|cytoskeleton organization|intracellular membrane-bounded organelle|metal ion binding|cell migration|K63-linked pol…			rno-Zranb1_0003	http://159.226.67.237:8080/new/circ_detail.php?ID=rno-Zranb1_0003
circRNA_0480|Chr1:204959173_204961691_+	2519	1016	sense-overlapping	XM_006230445.3	Chr1:204938444_205000163_+	Zranb1	GeneID:100360606,Genbank:XM_006230445.3,RGD:2321751	zinc finger RANBP2-type containing 1, transcript variant X2	GO:0071947,GO:0030177,GO:0005634,GO:0035523,GO:0005654,GO:1990168,GO:0005737,GO:0005829,GO:0036459,GO:0007010,GO:0043231,GO:0046872,GO:0016477,GO:0070530,GO:0004843,GO:0022604,GO:0070536	protein deubiquitination involved in ubiquitin-dependent protein catabolic process|positive regulation of Wnt signaling pathway|nucleus|protein K29-linked deubiquitination|nucleoplasm|protein K33-linked deubiquitination|cytoplasm|cytosol|thiol-dependent ubiquitinyl hydrolase activity|cytoskeleton organization|intracellular membrane-bounded organelle|metal ion binding|cell migration|K63-linked pol…			rno-Zranb1_0001	http://159.226.67.237:8080/new/circ_detail.php?ID=rno-Zranb1_0001
circRNA_0481|Chr1:204959173_204975227_+	16055	14552	sense-overlapping	XM_006230445.3	Chr1:204938444_205000163_+	Zranb1	GeneID:100360606,Genbank:XM_006230445.3,RGD:2321751	zinc finger RANBP2-type containing 1, transcript variant X2	GO:0071947,GO:0030177,GO:0005634,GO:0035523,GO:0005654,GO:1990168,GO:0005737,GO:0005829,GO:0036459,GO:0007010,GO:0043231,GO:0046872,GO:0016477,GO:0070530,GO:0004843,GO:0022604,GO:0070536	protein deubiquitination involved in ubiquitin-dependent protein catabolic process|positive regulation of Wnt signaling pathway|nucleus|protein K29-linked deubiquitination|nucleoplasm|protein K33-linked deubiquitination|cytoplasm|cytosol|thiol-dependent ubiquitinyl hydrolase activity|cytoskeleton organization|intracellular membrane-bounded organelle|metal ion binding|cell migration|K63-linked pol…			rno-Zranb1_0009	http://159.226.67.237:8080/new/circ_detail.php?ID=rno-Zranb1_0009
circRNA_0482|Chr1:204959173_204980121_+	20949	1204	sense-overlapping	XM_006230445.3	Chr1:204938444_205000163_+	Zranb1	GeneID:100360606,Genbank:XM_006230445.3,RGD:2321751	zinc finger RANBP2-type containing 1, transcript variant X2	GO:0071947,GO:0030177,GO:0005634,GO:0035523,GO:0005654,GO:1990168,GO:0005737,GO:0005829,GO:0036459,GO:0007010,GO:0043231,GO:0046872,GO:0016477,GO:0070530,GO:0004843,GO:0022604,GO:0070536	protein deubiquitination involved in ubiquitin-dependent protein catabolic process|positive regulation of Wnt signaling pathway|nucleus|protein K29-linked deubiquitination|nucleoplasm|protein K33-linked deubiquitination|cytoplasm|cytosol|thiol-dependent ubiquitinyl hydrolase activity|cytoskeleton organization|intracellular membrane-bounded organelle|metal ion binding|cell migration|K63-linked pol…			rno-Zranb1_0008	http://159.226.67.237:8080/new/circ_detail.php?ID=rno-Zranb1_0008
circRNA_0483|Chr1:204959173_204986761_+	27589	1430	sense-overlapping	XM_006230445.3	Chr1:204938444_205000163_+	Zranb1	GeneID:100360606,Genbank:XM_006230445.3,RGD:2321751	zinc finger RANBP2-type containing 1, transcript variant X2	GO:0071947,GO:0030177,GO:0005634,GO:0035523,GO:0005654,GO:1990168,GO:0005737,GO:0005829,GO:0036459,GO:0007010,GO:0043231,GO:0046872,GO:0016477,GO:0070530,GO:0004843,GO:0022604,GO:0070536	protein deubiquitination involved in ubiquitin-dependent protein catabolic process|positive regulation of Wnt signaling pathway|nucleus|protein K29-linked deubiquitination|nucleoplasm|protein K33-linked deubiquitination|cytoplasm|cytosol|thiol-dependent ubiquitinyl hydrolase activity|cytoskeleton organization|intracellular membrane-bounded organelle|metal ion binding|cell migration|K63-linked pol…			rno-Zranb1_0019	http://159.226.67.237:8080/new/circ_detail.php?ID=rno-Zranb1_0019
circRNA_0484|Chr1:204959173_204988430_+	29258	1629	sense-overlapping	XM_006230445.3	Chr1:204938444_205000163_+	Zranb1	GeneID:100360606,Genbank:XM_006230445.3,RGD:2321751	zinc finger RANBP2-type containing 1, transcript variant X2	GO:0071947,GO:0030177,GO:0005634,GO:0035523,GO:0005654,GO:1990168,GO:0005737,GO:0005829,GO:0036459,GO:0007010,GO:0043231,GO:0046872,GO:0016477,GO:0070530,GO:0004843,GO:0022604,GO:0070536	protein deubiquitination involved in ubiquitin-dependent protein catabolic process|positive regulation of Wnt signaling pathway|nucleus|protein K29-linked deubiquitination|nucleoplasm|protein K33-linked deubiquitination|cytoplasm|cytosol|thiol-dependent ubiquitinyl hydrolase activity|cytoskeleton organization|intracellular membrane-bounded organelle|metal ion binding|cell migration|K63-linked pol…			rno-Zranb1_0005	http://159.226.67.237:8080/new/circ_detail.php?ID=rno-Zranb1_0005
circRNA_0485|Chr1:204960841_204961691_+	851	851	exonic	XM_006230445.3	Chr1:204938444_205000163_+	Zranb1	GeneID:100360606,Genbank:XM_006230445.3,RGD:2321751	zinc finger RANBP2-type containing 1, transcript variant X2	GO:0071947,GO:0030177,GO:0005634,GO:0035523,GO:0005654,GO:1990168,GO:0005737,GO:0005829,GO:0036459,GO:0007010,GO:0043231,GO:0046872,GO:0016477,GO:0070530,GO:0004843,GO:0022604,GO:0070536	protein deubiquitination involved in ubiquitin-dependent protein catabolic process|positive regulation of Wnt signaling pathway|nucleus|protein K29-linked deubiquitination|nucleoplasm|protein K33-linked deubiquitination|cytoplasm|cytosol|thiol-dependent ubiquitinyl hydrolase activity|cytoskeleton organization|intracellular membrane-bounded organelle|metal ion binding|cell migration|K63-linked pol…			rno-Zranb1_0002	http://159.226.67.237:8080/new/circ_detail.php?ID=rno-Zranb1_0002	RNO_CIRCpedia_8426	ENSRNOT00000023257.7	Zranb1
circRNA_0486|Chr1:204960841_204975227_+	14387	14387	sense-overlapping	XM_006230445.3	Chr1:204938444_205000163_+	Zranb1	GeneID:100360606,Genbank:XM_006230445.3,RGD:2321751	zinc finger RANBP2-type containing 1, transcript variant X2	GO:0071947,GO:0030177,GO:0005634,GO:0035523,GO:0005654,GO:1990168,GO:0005737,GO:0005829,GO:0036459,GO:0007010,GO:0043231,GO:0046872,GO:0016477,GO:0070530,GO:0004843,GO:0022604,GO:0070536	protein deubiquitination involved in ubiquitin-dependent protein catabolic process|positive regulation of Wnt signaling pathway|nucleus|protein K29-linked deubiquitination|nucleoplasm|protein K33-linked deubiquitination|cytoplasm|cytosol|thiol-dependent ubiquitinyl hydrolase activity|cytoskeleton organization|intracellular membrane-bounded organelle|metal ion binding|cell migration|K63-linked pol…			rno-Zranb1_0010	http://159.226.67.237:8080/new/circ_detail.php?ID=rno-Zranb1_0010
circRNA_0487|Chr1:204960841_204980121_+	19281	1039	sense-overlapping	XM_006230445.3	Chr1:204938444_205000163_+	Zranb1	GeneID:100360606,Genbank:XM_006230445.3,RGD:2321751	zinc finger RANBP2-type containing 1, transcript variant X2	GO:0071947,GO:0030177,GO:0005634,GO:0035523,GO:0005654,GO:1990168,GO:0005737,GO:0005829,GO:0036459,GO:0007010,GO:0043231,GO:0046872,GO:0016477,GO:0070530,GO:0004843,GO:0022604,GO:0070536	protein deubiquitination involved in ubiquitin-dependent protein catabolic process|positive regulation of Wnt signaling pathway|nucleus|protein K29-linked deubiquitination|nucleoplasm|protein K33-linked deubiquitination|cytoplasm|cytosol|thiol-dependent ubiquitinyl hydrolase activity|cytoskeleton organization|intracellular membrane-bounded organelle|metal ion binding|cell migration|K63-linked pol…			rno-Zranb1_0004	http://159.226.67.237:8080/new/circ_detail.php?ID=rno-Zranb1_0004	RNO_CIRCpedia_1878	ENSRNOT00000023257.7	Zranb1
circRNA_0488|Chr1:204960841_204988430_+	27590	1464	sense-overlapping	XM_006230445.3	Chr1:204938444_205000163_+	Zranb1	GeneID:100360606,Genbank:XM_006230445.3,RGD:2321751	zinc finger RANBP2-type containing 1, transcript variant X2	GO:0071947,GO:0030177,GO:0005634,GO:0035523,GO:0005654,GO:1990168,GO:0005737,GO:0005829,GO:0036459,GO:0007010,GO:0043231,GO:0046872,GO:0016477,GO:0070530,GO:0004843,GO:0022604,GO:0070536	protein deubiquitination involved in ubiquitin-dependent protein catabolic process|positive regulation of Wnt signaling pathway|nucleus|protein K29-linked deubiquitination|nucleoplasm|protein K33-linked deubiquitination|cytoplasm|cytosol|thiol-dependent ubiquitinyl hydrolase activity|cytoskeleton organization|intracellular membrane-bounded organelle|metal ion binding|cell migration|K63-linked pol…			rno-Zranb1_0006	http://159.226.67.237:8080/new/circ_detail.php?ID=rno-Zranb1_0006	RNO_CIRCpedia_1879	ENSRNOT00000023257.7	Zranb1
circRNA_0489|Chr1:204975105_204988430_+	13326	5442	sense-overlapping	XM_006230445.3	Chr1:204938444_205000163_+	Zranb1	GeneID:100360606,Genbank:XM_006230445.3,RGD:2321751	zinc finger RANBP2-type containing 1, transcript variant X2	GO:0071947,GO:0030177,GO:0005634,GO:0035523,GO:0005654,GO:1990168,GO:0005737,GO:0005829,GO:0036459,GO:0007010,GO:0043231,GO:0046872,GO:0016477,GO:0070530,GO:0004843,GO:0022604,GO:0070536	protein deubiquitination involved in ubiquitin-dependent protein catabolic process|positive regulation of Wnt signaling pathway|nucleus|protein K29-linked deubiquitination|nucleoplasm|protein K33-linked deubiquitination|cytoplasm|cytosol|thiol-dependent ubiquitinyl hydrolase activity|cytoskeleton organization|intracellular membrane-bounded organelle|metal ion binding|cell migration|K63-linked pol…			rno-Zranb1_0014	http://159.226.67.237:8080/new/circ_detail.php?ID=rno-Zranb1_0014
circRNA_0490|Chr1:205040507_205043157_-	2651	2651	intergenic										rno-Ctbp2_0003	http://159.226.67.237:8080/new/circ_detail.php?ID=rno-Ctbp2_0003
circRNA_0491|Chr1:206022002_206028748_-	6747	404	sense-overlapping	XM_017590241.1	Chr1:205951840_206286285_-	Adam12	GeneID:679837,Genbank:XM_017590241.1,RGD:1583652	ADAM metallopeptidase domain 12, transcript variant X2	GO:0005615,GO:0005654,GO:0005886,GO:0006508,GO:0008150,GO:0016021,GO:0017124,GO:0045766,GO:0046872,GO:0003674,GO:0004222,GO:0005575	extracellular space|nucleoplasm|plasma membrane|proteolysis|biological_process|integral component of membrane|SH3 domain binding|positive regulation of angiogenesis|metal ion binding|molecular_function|metalloendopeptidase activity|cellular_component			rno-Adam12_0002	http://159.226.67.237:8080/new/circ_detail.php?ID=rno-Adam12_0002
circRNA_0492|Chr1:206131433_206132501_-	1069	1069	intronic	XM_017590241.1	Chr1:205951840_206286285_-	Adam12	GeneID:679837,Genbank:XM_017590241.1,RGD:1583652	ADAM metallopeptidase domain 12, transcript variant X2	GO:0005615,GO:0005654,GO:0005886,GO:0006508,GO:0008150,GO:0016021,GO:0017124,GO:0045766,GO:0046872,GO:0003674,GO:0004222,GO:0005575	extracellular space|nucleoplasm|plasma membrane|proteolysis|biological_process|integral component of membrane|SH3 domain binding|positive regulation of angiogenesis|metal ion binding|molecular_function|metalloendopeptidase activity|cellular_component			rno-Adam12_0008	http://159.226.67.237:8080/new/circ_detail.php?ID=rno-Adam12_0008
circRNA_0493|Chr1:206956299_206969242_+	12944	278	sense-overlapping	NM_001143858.1	Chr1:206900617_207414852_+	Dock1	GeneID:309081,Genbank:NM_001143858.1,RGD:1566072	dedicator of cyto-kinesis 1	GO:0005634,GO:0005737,GO:0005829,GO:0007010,GO:0007264,GO:0010634,GO:0016477,GO:0016607,GO:0032045,GO:0002244,GO:0043547,GO:0005085,GO:1900026,GO:0005096	nucleus|cytoplasm|cytosol|cytoskeleton organization|small GTPase mediated signal transduction|positive regulation of epithelial cell migration|cell migration|nuclear speck|guanyl-nucleotide exchange factor complex|hematopoietic progenitor cell differentiation|positive regulation of GTPase activity|guanyl-nucleotide exchange factor activity|positive regulation of substrate adhesion-dependent cell …	rno04510,rno04810,rno05100	Focal adhesion|Regulation of actin cytoskeleton|Bacterial invasion of epithelial cells	rno-Dock1_0002	http://159.226.67.237:8080/new/circ_detail.php?ID=rno-Dock1_0002
circRNA_0494|Chr1:206956299_206978733_+	22435	939	sense-overlapping	NM_001143858.1	Chr1:206900617_207414852_+	Dock1	GeneID:309081,Genbank:NM_001143858.1,RGD:1566072	dedicator of cyto-kinesis 1	GO:0005634,GO:0005737,GO:0005829,GO:0007010,GO:0007264,GO:0010634,GO:0016477,GO:0016607,GO:0032045,GO:0002244,GO:0043547,GO:0005085,GO:1900026,GO:0005096	nucleus|cytoplasm|cytosol|cytoskeleton organization|small GTPase mediated signal transduction|positive regulation of epithelial cell migration|cell migration|nuclear speck|guanyl-nucleotide exchange factor complex|hematopoietic progenitor cell differentiation|positive regulation of GTPase activity|guanyl-nucleotide exchange factor activity|positive regulation of substrate adhesion-dependent cell …	rno04510,rno04810,rno05100	Focal adhesion|Regulation of actin cytoskeleton|Bacterial invasion of epithelial cells	rno-Dock1_0015	http://159.226.67.237:8080/new/circ_detail.php?ID=rno-Dock1_0015	RNO_CIRCpedia_5150	ENSRNOT00000054897.2	Dock1
circRNA_0495|Chr1:206989832_207016489_+	26658	1080	sense-overlapping	NM_001143858.1	Chr1:206900617_207414852_+	Dock1	GeneID:309081,Genbank:NM_001143858.1,RGD:1566072	dedicator of cyto-kinesis 1	GO:0005634,GO:0005737,GO:0005829,GO:0007010,GO:0007264,GO:0010634,GO:0016477,GO:0016607,GO:0032045,GO:0002244,GO:0043547,GO:0005085,GO:1900026,GO:0005096	nucleus|cytoplasm|cytosol|cytoskeleton organization|small GTPase mediated signal transduction|positive regulation of epithelial cell migration|cell migration|nuclear speck|guanyl-nucleotide exchange factor complex|hematopoietic progenitor cell differentiation|positive regulation of GTPase activity|guanyl-nucleotide exchange factor activity|positive regulation of substrate adhesion-dependent cell …	rno04510,rno04810,rno05100	Focal adhesion|Regulation of actin cytoskeleton|Bacterial invasion of epithelial cells
circRNA_0496|Chr1:207005330_207016489_+	11160	577	sense-overlapping	NM_001143858.1	Chr1:206900617_207414852_+	Dock1	GeneID:309081,Genbank:NM_001143858.1,RGD:1566072	dedicator of cyto-kinesis 1	GO:0005634,GO:0005737,GO:0005829,GO:0007010,GO:0007264,GO:0010634,GO:0016477,GO:0016607,GO:0032045,GO:0002244,GO:0043547,GO:0005085,GO:1900026,GO:0005096	nucleus|cytoplasm|cytosol|cytoskeleton organization|small GTPase mediated signal transduction|positive regulation of epithelial cell migration|cell migration|nuclear speck|guanyl-nucleotide exchange factor complex|hematopoietic progenitor cell differentiation|positive regulation of GTPase activity|guanyl-nucleotide exchange factor activity|positive regulation of substrate adhesion-dependent cell …	rno04510,rno04810,rno05100	Focal adhesion|Regulation of actin cytoskeleton|Bacterial invasion of epithelial cells	rno-Dock1_0016	http://159.226.67.237:8080/new/circ_detail.php?ID=rno-Dock1_0016
circRNA_0497|Chr1:207040277_207088396_+	48120	287	sense-overlapping	NM_001143858.1	Chr1:206900617_207414852_+	Dock1	GeneID:309081,Genbank:NM_001143858.1,RGD:1566072	dedicator of cyto-kinesis 1	GO:0005634,GO:0005737,GO:0005829,GO:0007010,GO:0007264,GO:0010634,GO:0016477,GO:0016607,GO:0032045,GO:0002244,GO:0043547,GO:0005085,GO:1900026,GO:0005096	nucleus|cytoplasm|cytosol|cytoskeleton organization|small GTPase mediated signal transduction|positive regulation of epithelial cell migration|cell migration|nuclear speck|guanyl-nucleotide exchange factor complex|hematopoietic progenitor cell differentiation|positive regulation of GTPase activity|guanyl-nucleotide exchange factor activity|positive regulation of substrate adhesion-dependent cell …	rno04510,rno04810,rno05100	Focal adhesion|Regulation of actin cytoskeleton|Bacterial invasion of epithelial cells	rno-Dock1_0023	http://159.226.67.237:8080/new/circ_detail.php?ID=rno-Dock1_0023	RNO_CIRCpedia_5151	ENSRNOT00000054897.2	Dock1
circRNA_0498|Chr1:209710668_209711353_-	686	686	sense-overlapping	XM_002728861.4	Chr1:209710798_209749973_-	LOC100362342	GeneID:100362342,Genbank:XM_002728861.4,RGD:2318344	rCG47764-like					rno-intergenic_000280	http://159.226.67.237:8080/new/circ_detail.php?ID=rno-intergenic_000280
circRNA_0499|Chr1:209792071_209795897_+	3827	346	sense-overlapping	NM_032614.2	Chr1:209768696_209799908_+	Glrx3	GeneID:58815,Genbank:NM_032614.2,RGD:69414	glutaredoxin 3	GO:0046872,GO:0005634,GO:0051536,GO:0005829,GO:0097428,GO:0005938,GO:0009055,GO:0010614,GO:0015035,GO:0022900,GO:0030018,GO:0030425,GO:0042802,GO:0044571,GO:0002026,GO:0005080,GO:0045454,GO:0005623	metal ion binding|nucleus|iron-sulfur cluster binding|cytosol|protein maturation by iron-sulfur cluster transfer|cell cortex|electron transfer activity|negative regulation of cardiac muscle hypertrophy|protein disulfide oxidoreductase activity|electron transport chain|Z disc|dendrite|identical protein binding|[2Fe-2S] cluster assembly|regulation of the force of heart contraction|protein kinase C …			rno-Glrx3_0003	http://159.226.67.237:8080/new/circ_detail.php?ID=rno-Glrx3_0003	RNO_CIRCpedia_9473	ENSRNOT00000022406.6	Glrx3
circRNA_0500|Chr1:211900102_211908305_+	8204	245	sense-overlapping	XM_006230486.2	Chr1:211732163_211920844_+	Inpp5a	GeneID:365382,Genbank:XM_006230486.2,RGD:1306168	inositol polyphosphate-5-phosphatase A, transcript variant X1	GO:0046855,GO:0046856,GO:0048016,GO:0004445,GO:0005622,GO:0042731	inositol phosphate dephosphorylation|phosphatidylinositol dephosphorylation|inositol phosphate-mediated signaling|inositol-polyphosphate 5-phosphatase activity|intracellular|PH domain binding	rno00562,rno04070	Inositol phosphate metabolism|Phosphatidylinositol signaling system	rno-Inpp5a_0005	http://159.226.67.237:8080/new/circ_detail.php?ID=rno-Inpp5a_0005
circRNA_0501|Chr1:212336433_212337007_-	575	265	sense-overlapping	NM_001107560.2	Chr1:212333740_212354273_-	Tubgcp2	GeneID:309098,Genbank:NM_001107560.2,RGD:1309597	tubulin, gamma complex associated protein 2	GO:0051011,GO:0005200,GO:0005654,GO:0051298,GO:0005813,GO:0005816,GO:0005874,GO:0051321,GO:0006508,GO:0051415,GO:0007229,GO:0090307,GO:0008237,GO:0008275,GO:0000922,GO:0031122,GO:0000923,GO:0043015,GO:0000930	microtubule minus-end binding|structural constituent of cytoskeleton|nucleoplasm|centrosome duplication|centrosome|spindle pole body|microtubule|meiotic cell cycle|proteolysis|microtubule nucleation by interphase microtubule organizing center|integrin-mediated signaling pathway|mitotic spindle assembly|metallopeptidase activity|gamma-tubulin small complex|spindle pole|cytoplasmic microtubule orga…			rno-Tubgcp2_0001	http://159.226.67.237:8080/new/circ_detail.php?ID=rno-Tubgcp2_0001
circRNA_0502|Chr1:212607452_212614056_+	6605	399	sense-overlapping	XM_003749002.4	Chr1:212606753_212619493_+	Mtg1	GeneID:100910751,Genbank:XM_003749002.4,RGD:6497155	mitochondrial ribosome-associated GTPase 1, transcript variant X2	GO:0005739,GO:0005743,GO:0005759,GO:0005761,GO:0042254,GO:0044065,GO:0070129,GO:0003924,GO:0005525	mitochondrion|mitochondrial inner membrane|mitochondrial matrix|mitochondrial ribosome|ribosome biogenesis|regulation of respiratory system process|regulation of mitochondrial translation|GTPase activity|GTP binding			rno-Mtg1_0002	http://159.226.67.237:8080/new/circ_detail.php?ID=rno-Mtg1_0002
circRNA_0503|Chr1:214562895_214581660_+	18766	638	sense-overlapping	XM_008760010.2	Chr1:214534217_214607497_+	Ap2a2	GeneID:81637,Genbank:XM_008760010.2,RGD:71015	adaptor-related protein complex 2, alpha 2 subunit, transcript variant X1	GO:0035615,GO:0006886,GO:0044877,GO:0008021,GO:0072583,GO:0008150,GO:0008565,GO:0019901,GO:0019904,GO:0097718,GO:0030117,GO:0030122,GO:0030131,GO:0031410,GO:0005515,GO:0005886,GO:0035091,GO:0005905	clathrin adaptor activity|intracellular protein transport|protein-containing complex binding|synaptic vesicle|clathrin-dependent endocytosis|biological_process|protein transporter activity|protein kinase binding|protein domain specific binding|disordered domain specific binding|membrane coat|AP-2 adaptor complex|clathrin adaptor complex|cytoplasmic vesicle|protein binding|plasma membrane|phosphat…	rno04144,rno04961,rno04721,rno05016	Endocytosis|Endocrine and other factor-regulated calcium reabsorption|Synaptic vesicle cycle|Huntington's disease	rno-Ap2a2_0004	http://159.226.67.237:8080/new/circ_detail.php?ID=rno-Ap2a2_0004	RNO_CIRCpedia_5152	ENSRNOT00000064254.2	Ap2a2
circRNA_0504|Chr1:214562895_214605872_+	42978	2781	sense-overlapping	XM_008760010.2	Chr1:214534217_214607497_+	Ap2a2	GeneID:81637,Genbank:XM_008760010.2,RGD:71015	adaptor-related protein complex 2, alpha 2 subunit, transcript variant X1	GO:0035615,GO:0006886,GO:0044877,GO:0008021,GO:0072583,GO:0008150,GO:0008565,GO:0019901,GO:0019904,GO:0097718,GO:0030117,GO:0030122,GO:0030131,GO:0031410,GO:0005515,GO:0005886,GO:0035091,GO:0005905	clathrin adaptor activity|intracellular protein transport|protein-containing complex binding|synaptic vesicle|clathrin-dependent endocytosis|biological_process|protein transporter activity|protein kinase binding|protein domain specific binding|disordered domain specific binding|membrane coat|AP-2 adaptor complex|clathrin adaptor complex|cytoplasmic vesicle|protein binding|plasma membrane|phosphat…	rno04144,rno04961,rno04721,rno05016	Endocytosis|Endocrine and other factor-regulated calcium reabsorption|Synaptic vesicle cycle|Huntington's disease	rno-Ap2a2_0015	http://159.226.67.237:8080/new/circ_detail.php?ID=rno-Ap2a2_0015
circRNA_0505|Chr1:214574407_214581660_+	7254	569	sense-overlapping	XM_008760010.2	Chr1:214534217_214607497_+	Ap2a2	GeneID:81637,Genbank:XM_008760010.2,RGD:71015	adaptor-related protein complex 2, alpha 2 subunit, transcript variant X1	GO:0035615,GO:0006886,GO:0044877,GO:0008021,GO:0072583,GO:0008150,GO:0008565,GO:0019901,GO:0019904,GO:0097718,GO:0030117,GO:0030122,GO:0030131,GO:0031410,GO:0005515,GO:0005886,GO:0035091,GO:0005905	clathrin adaptor activity|intracellular protein transport|protein-containing complex binding|synaptic vesicle|clathrin-dependent endocytosis|biological_process|protein transporter activity|protein kinase binding|protein domain specific binding|disordered domain specific binding|membrane coat|AP-2 adaptor complex|clathrin adaptor complex|cytoplasmic vesicle|protein binding|plasma membrane|phosphat…	rno04144,rno04961,rno04721,rno05016	Endocytosis|Endocrine and other factor-regulated calcium reabsorption|Synaptic vesicle cycle|Huntington's disease	rno-Ap2a2_0008	http://159.226.67.237:8080/new/circ_detail.php?ID=rno-Ap2a2_0008
circRNA_0506|Chr1:214933395_214938246_+	4852	541	sense-overlapping	XM_017590258.1	Chr1:214918757_214940883_+	Brsk2	GeneID:293631,Genbank:XM_017590258.1,RGD:1566256	BR serine/threonine kinase 2, transcript variant X3	GO:0005524,GO:0005634,GO:0005737,GO:0005783,GO:0007409,GO:0009411,GO:0005813,GO:0010212,GO:0018105,GO:0019901,GO:0050321,GO:0030010,GO:0051117,GO:0051301,GO:0061178,GO:0000086,GO:0070059,GO:0000287,GO:0004674,GO:0006468,GO:0006887,GO:0006974,GO:0007095,GO:0030182,GO:0031532,GO:0035556,GO:0036503,GO:0048471,GO:0048812	ATP binding|nucleus|cytoplasm|endoplasmic reticulum|axonogenesis|response to UV|centrosome|response to ionizing radiation|peptidyl-serine phosphorylation|protein kinase binding|tau-protein kinase activity|establishment of cell polarity|ATPase binding|cell division|regulation of insulin secretion involved in cellular response to glucose stimulus|G2/M transition of mitotic cell cycle|intrinsic apop…			rno-Brsk2_0001	http://159.226.67.237:8080/new/circ_detail.php?ID=rno-Brsk2_0001	RNO_CIRCpedia_1885	ENSRNOT00000027134.6	Brsk2
circRNA_0507|Chr1:215905137_215907047_-	1911	1911	intronic
circRNA_0508|Chr1:215905137_215910920_-	5784	5784	intronic
circRNA_0509|Chr1:215905137_215914784_-	9648	9648	intronic										rno-AC099449_0008	http://159.226.67.237:8080/new/circ_detail.php?ID=rno-AC099449_0008
circRNA_0510|Chr1:215905137_215918638_-	13502	13502	intronic										rno-AC099449_0014	http://159.226.67.237:8080/new/circ_detail.php?ID=rno-AC099449_0014
circRNA_0511|Chr1:215905137_215934080_-	28944	28944	intronic										rno-AC099449_0007	http://159.226.67.237:8080/new/circ_detail.php?ID=rno-AC099449_0007
circRNA_0512|Chr1:215905137_215969554_-	64418	64418	intronic										rno-AC099449_0002	http://159.226.67.237:8080/new/circ_detail.php?ID=rno-AC099449_0002
circRNA_0513|Chr1:215905165_215914784_-	9620	9620	intronic										rno-AC099449_0005	http://159.226.67.237:8080/new/circ_detail.php?ID=rno-AC099449_0005
circRNA_0514|Chr1:215907048_215939788_-	32741	32741	intronic
circRNA_0515|Chr1:215907048_215968014_-	60967	60967	intronic
circRNA_0516|Chr1:215910921_215968014_-	57094	57094	intronic
circRNA_0517|Chr1:215912561_215934212_-	21652	21652	intronic
circRNA_0518|Chr1:215920293_215934212_-	13920	13920	intronic
circRNA_0519|Chr1:215934081_215939788_-	5708	5708	intronic
circRNA_0520|Chr1:215934081_215968014_-	33934	33934	intronic
circRNA_0521|Chr1:215939908_215941816_-	1909	1909	intronic
circRNA_0522|Chr1:216737401_216742438_-	5038	388	sense-overlapping	XM_006230824.3	Chr1:216715352_216751710_-	Nap1l4	GeneID:361684,Genbank:XM_006230824.3,RGD:1305391	nucleosome assembly protein 1-like 4, transcript variant X2	GO:0005737,GO:0006334,GO:0030425,GO:0031491,GO:0043025,GO:0005634	cytoplasm|nucleosome assembly|dendrite|nucleosome binding|neuronal cell body|nucleus			rno-Nap1l4_0007	http://159.226.67.237:8080/new/circ_detail.php?ID=rno-Nap1l4_0007
circRNA_0523|Chr1:217663306_217663860_-	555	267	sense-overlapping	NM_001106320.2	Chr1:217644259_217720221_-	Ppfia1	GeneID:293645,Genbank:NM_001106320.2,RGD:1309009	PTPRF interacting protein alpha 1	GO:0030425,GO:0032991,GO:0051497,GO:1903077,GO:0005829,GO:0005925,GO:0030424	dendrite|protein-containing complex|negative regulation of stress fiber assembly|negative regulation of protein localization to plasma membrane|cytosol|focal adhesion|axon			rno-Ppfia1_0002	http://159.226.67.237:8080/new/circ_detail.php?ID=rno-Ppfia1_0002	RNO_CIRCpedia_9474	ENSRNOT00000078810.1	Ppfia1
circRNA_0524|Chr1:217663762_217664930_+	1169	195	antisense	NM_001106320.2	Chr1:217644259_217720221_-	Ppfia1	GeneID:293645,Genbank:NM_001106320.2,RGD:1309009	PTPRF interacting protein alpha 1	GO:0030425,GO:0032991,GO:0051497,GO:1903077,GO:0005829,GO:0005925,GO:0030424	dendrite|protein-containing complex|negative regulation of stress fiber assembly|negative regulation of protein localization to plasma membrane|cytosol|focal adhesion|axon
circRNA_0525|Chr1:217686376_217686816_-	441	267	sense-overlapping	NM_001106320.2	Chr1:217644259_217720221_-	Ppfia1	GeneID:293645,Genbank:NM_001106320.2,RGD:1309009	PTPRF interacting protein alpha 1	GO:0030425,GO:0032991,GO:0051497,GO:1903077,GO:0005829,GO:0005925,GO:0030424	dendrite|protein-containing complex|negative regulation of stress fiber assembly|negative regulation of protein localization to plasma membrane|cytosol|focal adhesion|axon					RNO_CIRCpedia_1887	ENSRNOT00000078810.1	Ppfia1
circRNA_0526|Chr1:217835316_217835648_-	333	333	exonic	NM_001107564.1	Chr1:217754349_217902473_-	Ano1	GeneID:309135,Genbank:NM_001107564.1,RGD:1310786	anoctamin 1	GO:0050965,GO:0015705,GO:0005229,GO:0050966,GO:0016021,GO:0005247,GO:0060438,GO:0016324,GO:0005254,GO:1902476,GO:0005886,GO:0006812,GO:0006821,GO:0017128,GO:0034605,GO:0007200,GO:0035774,GO:0009897,GO:0042391,GO:0015111,GO:0005227,GO:0042803,GO:0046982	detection of temperature stimulus involved in sensory perception of pain|iodide transport|intracellular calcium activated chloride channel activity|detection of mechanical stimulus involved in sensory perception of pain|integral component of membrane|voltage-gated chloride channel activity|trachea development|apical plasma membrane|chloride channel activity|chloride transmembrane transport|plasma…			rno-Ano1_0003	http://159.226.67.237:8080/new/circ_detail.php?ID=rno-Ano1_0003
circRNA_0527|Chr1:218612525_218612720_+	196	196	exonic	XM_006230695.2	Chr1:218568157_218629679_+	Cpt1a	GeneID:25757,Genbank:XM_006230695.2,RGD:2396	carnitine palmitoyltransferase 1A, transcript variant X1	GO:0042493,GO:0009437,GO:0001676,GO:0042755,GO:0004095,GO:0042802,GO:0043231,GO:0005515,GO:0005739,GO:0014070,GO:0046320,GO:0016021,GO:0005741,GO:0050796,GO:0030855,GO:0005789,GO:0051260,GO:0031307,GO:0006006,GO:0071398,GO:0031998,GO:0006635,GO:1990698,GO:0032000,GO:0006641	response to drug|carnitine metabolic process|long-chain fatty acid metabolic process|eating behavior|carnitine O-palmitoyltransferase activity|identical protein binding|intracellular membrane-bounded organelle|protein binding|mitochondrion|response to organic cyclic compound|regulation of fatty acid oxidation|integral component of membrane|mitochondrial outer membrane|regulation of insulin secret…	rno00071,rno04152,rno04922,rno04920,rno03320,rno04714,rno04931	Fatty acid degradation|AMPK signaling pathway|Glucagon signaling pathway|Adipocytokine signaling pathway|PPAR signaling pathway|Thermogenesis|Insulin resistance	rno-Cpt1a_0002	http://159.226.67.237:8080/new/circ_detail.php?ID=rno-Cpt1a_0002
circRNA_0528|Chr1:218719311_218733334_-	14024	504	sense-overlapping	NM_001287134.1	Chr1:218695738_218810118_-	Ppp6r3	GeneID:309144,Genbank:NM_001287134.1,RGD:1307145	protein phosphatase 6, regulatory subunit 3	GO:0005829,GO:0005886,GO:0019903,GO:0043666,GO:0005654	cytosol|plasma membrane|protein phosphatase binding|regulation of phosphoprotein phosphatase activity|nucleoplasm			rno-Ppp6r3_0010	http://159.226.67.237:8080/new/circ_detail.php?ID=rno-Ppp6r3_0010	RNO_CIRCpedia_6561	ENSRNOT00000065950.4	Ppp6r3
circRNA_0529|Chr1:218727735_218755192_-	27458	907	sense-overlapping	NM_001287134.1	Chr1:218695738_218810118_-	Ppp6r3	GeneID:309144,Genbank:NM_001287134.1,RGD:1307145	protein phosphatase 6, regulatory subunit 3	GO:0005829,GO:0005886,GO:0019903,GO:0043666,GO:0005654	cytosol|plasma membrane|protein phosphatase binding|regulation of phosphoprotein phosphatase activity|nucleoplasm			rno-Ppp6r3_0026	http://159.226.67.237:8080/new/circ_detail.php?ID=rno-Ppp6r3_0026	RNO_CIRCpedia_9475	ENSRNOT00000065950.4	Ppp6r3
circRNA_0530|Chr1:218748004_218778447_-	30444	999	sense-overlapping	XM_008760128.1	Chr1:218695741_218810139_-	Ppp6r3	GeneID:309144,Genbank:XM_008760128.1,RGD:1307145	protein phosphatase 6, regulatory subunit 3, transcript variant X6	GO:0005829,GO:0005886,GO:0019903,GO:0043666,GO:0005654	cytosol|plasma membrane|protein phosphatase binding|regulation of phosphoprotein phosphatase activity|nucleoplasm			rno-Ppp6r3_0033	http://159.226.67.237:8080/new/circ_detail.php?ID=rno-Ppp6r3_0033
circRNA_0531|Chr1:218776098_218778447_-	2350	2350	sense-overlapping	XM_008760128.1	Chr1:218695741_218810139_-	Ppp6r3	GeneID:309144,Genbank:XM_008760128.1,RGD:1307145	protein phosphatase 6, regulatory subunit 3, transcript variant X6	GO:0005829,GO:0005886,GO:0019903,GO:0043666,GO:0005654	cytosol|plasma membrane|protein phosphatase binding|regulation of phosphoprotein phosphatase activity|nucleoplasm			rno-Ppp6r3_0039	http://159.226.67.237:8080/new/circ_detail.php?ID=rno-Ppp6r3_0039
circRNA_0532|Chr1:218777059_218778447_-	1389	1389	sense-overlapping	XM_008760128.1	Chr1:218695741_218810139_-	Ppp6r3	GeneID:309144,Genbank:XM_008760128.1,RGD:1307145	protein phosphatase 6, regulatory subunit 3, transcript variant X6	GO:0005829,GO:0005886,GO:0019903,GO:0043666,GO:0005654	cytosol|plasma membrane|protein phosphatase binding|regulation of phosphoprotein phosphatase activity|nucleoplasm			rno-Ppp6r3_0041	http://159.226.67.237:8080/new/circ_detail.php?ID=rno-Ppp6r3_0041
circRNA_0533|Chr1:218836671_218844420_-	7750	810	sense-overlapping	NM_001106321.2	Chr1:218816833_218920094_-	Lrp5	GeneID:293649,Genbank:NM_001106321.2,RGD:1309329	LDL receptor related protein 5	GO:0005886,GO:0006007,GO:0008203,GO:0008217,GO:0008284,GO:0009314,GO:0009952,GO:0042632,GO:0015026,GO:0042733,GO:0016021,GO:0042813,GO:0042981,GO:0043235,GO:0048539,GO:0043434,GO:0051091,GO:0044332,GO:0060033,GO:0060042,GO:0060070,GO:0001702,GO:0061304,GO:0060348,GO:0060349,GO:0001944,GO:0071901,GO:0002053,GO:0071936,GO:0002076,GO:1902262,GO:1904395,GO:0003674,GO:0005575,GO:0016055,GO:0017147,GO:…	plasma membrane|glucose catabolic process|cholesterol metabolic process|regulation of blood pressure|positive regulation of cell proliferation|response to radiation|anterior/posterior pattern specification|cholesterol homeostasis|coreceptor activity|embryonic digit morphogenesis|integral component of membrane|Wnt-activated receptor activity|regulation of apoptotic process|receptor complex|bone ma…	rno04310,rno04150,rno05200,rno05225,rno05226,rno05224	Wnt signaling pathway|mTOR signaling pathway|Pathways in cancer|Hepatocellular carcinoma|Gastric cancer|Breast cancer	rno-Lrp5_0007	http://159.226.67.237:8080/new/circ_detail.php?ID=rno-Lrp5_0007	RNO_CIRCpedia_5154	NM_001106321	Lrp5
circRNA_0534|Chr1:218838080_218844420_-	6341	600	sense-overlapping	NM_001106321.2	Chr1:218816833_218920094_-	Lrp5	GeneID:293649,Genbank:NM_001106321.2,RGD:1309329	LDL receptor related protein 5	GO:0005886,GO:0006007,GO:0008203,GO:0008217,GO:0008284,GO:0009314,GO:0009952,GO:0042632,GO:0015026,GO:0042733,GO:0016021,GO:0042813,GO:0042981,GO:0043235,GO:0048539,GO:0043434,GO:0051091,GO:0044332,GO:0060033,GO:0060042,GO:0060070,GO:0001702,GO:0061304,GO:0060348,GO:0060349,GO:0001944,GO:0071901,GO:0002053,GO:0071936,GO:0002076,GO:1902262,GO:1904395,GO:0003674,GO:0005575,GO:0016055,GO:0017147,GO:…	plasma membrane|glucose catabolic process|cholesterol metabolic process|regulation of blood pressure|positive regulation of cell proliferation|response to radiation|anterior/posterior pattern specification|cholesterol homeostasis|coreceptor activity|embryonic digit morphogenesis|integral component of membrane|Wnt-activated receptor activity|regulation of apoptotic process|receptor complex|bone ma…	rno04310,rno04150,rno05200,rno05225,rno05226,rno05224	Wnt signaling pathway|mTOR signaling pathway|Pathways in cancer|Hepatocellular carcinoma|Gastric cancer|Breast cancer
circRNA_0535|Chr1:219018599_219028923_+	10325	453	sense-overlapping	NM_001108512.1	Chr1:219000844_219050211_+	Kmt5b	GeneID:361688,Genbank:NM_001108512.1,RGD:1311637	lysine methyltransferase 5B	GO:0005634,GO:0006351,GO:0006355,GO:0007517,GO:0008150,GO:0016571,GO:0018024,GO:0034770,GO:0034773,GO:0042799,GO:0000780,GO:0003674,GO:0005575	nucleus|transcription, DNA-templated|regulation of transcription, DNA-templated|muscle organ development|biological_process|histone methylation|histone-lysine N-methyltransferase activity|histone H4-K20 methylation|histone H4-K20 trimethylation|histone methyltransferase activity (H4-K20 specific)|condensed nuclear chromosome, centromeric region|molecular_function|cellular_component	rno00310	Lysine degradation	rno-Kmt5b_0002	http://159.226.67.237:8080/new/circ_detail.php?ID=rno-Kmt5b_0002	RNO_CIRCpedia_1892	NM_001108512	Kmt5b
[truncated: 6,715 more rows]

## Sheet: SSCI-1 vs. sham
circRNA	case_value	control_value	FoldChange	log2FoldChange	z-score	pValue	qValue	Regulation	Expression_NC1	Expression_NC2	Expression_NC3	Expression_SCI1	Expression_SCI2	Expression_SCI3	genomic_length	circRNA_length	type	best.transcript	transcript_position	gene	Dbxref	product	GO_id	GO_term	pathway	pathway_description	circAtlas_id	circAtlas_data	CIRCpedia_id	transcript_CIRCpedia	genesymbol_CIRCpedia
[truncated: 1,339 more rows]

[truncated: 7 more sheets: SSCI-2 vs. sham, SSCI-3 vs. sham, SSCI-3 vs. SSCI-2, SSCI-3 vs. SSCI-1, SSCI-2 vs. SSCI-1, circRNA length region, circRNA chromosome density]
