# Supplementary material for: Expression profiles of circular RNAs and interaction networks of competing endogenous RNAs in neurogenic bladder of rats following suprasacral spinal cord injury
Source: PeerJ. 2023 Sep 18;11:e16042. doi: 10.7717/peerj.16042 (PMC10512963; doi:10.7717/peerj.16042)
Supplement: Supplemental Information 13 [file peerj-11-16042-s013.xlsx]

## Sheet: circRNA 0613
Target	Sample	circRNA 0613 Mean Cq	ACTB Mean Cq	∆ct	∆∆ct	2^-∆∆ct	MEAN	Expression
circRNA 0613	sham						1.00012	1
circRNA 0613	SSCI-1						8.23097	8.23
circRNA 0613	SSCI-2						5.85917	5.85848
circRNA 0613	SSCI-3						5.08127	5.08068
circRNA 0613	sham-1	30.3465	16.2081	14.1385	0	1		0.999883
circRNA 0613	sham-1	29.7273	15.751	13.9763	-0.162144	1.11895		1.11882
circRNA 0613	sham-1	29.8865	15.5864	14.3001	0.161639	0.894009		0.893904
circRNA 0613	SSCI-1	26.7619	15.9104	10.8515	-3.28694	9.76039		9.75925
circRNA 0613	SSCI-1	26.9765	15.7274	11.2492	-2.8893	7.40912		7.40826
circRNA 0613	SSCI-1	26.5845	15.393	11.1915	-2.94694	7.71114		7.71024
circRNA 0613	SSCI-2	27.4065	15.7113	11.6952	-2.44329	5.4388		5.43817
circRNA 0613	SSCI-2	27.2693	15.9105	11.3588	-2.77967	6.86694		6.86614
circRNA 0613	SSCI-2	27.3553	15.6459	11.7093	-2.42913	5.38568		5.38506
circRNA 0613	SSCI-3	27.5479	15.4394	12.1085	-2.02993	4.08385		4.08337
circRNA 0613	SSCI-3	27.1634	15.4546	11.7088	-2.42968	5.38774		5.38711
circRNA 0613	SSCI-3	26.9714	15.4089	11.5625	-2.57596	5.96266		5.96196

## Sheet: circRNA 2378
Target	Sample	circRNA 2378 Mean Cq	ACTB Mean Cq	∆ct	∆∆ct	2^-∆∆ct	MEAN	Expression
circRNA 2378	sham						1.22926	1
circRNA 2378	SSCI-1						9.27642	7.54633
circRNA 2378	SSCI-2						6.39568	5.20286
circRNA 2378	SSCI-3						15.9146	12.9464
circRNA 2378	sham-1	32.732	16.2081	16.524	0	1		0.813496
circRNA 2378	sham-1	32.0066	15.751	16.2557	-0.268303	1.20439		0.979766
circRNA 2378	sham-1	31.4853	15.5864	15.8989	-0.625077	1.54229		1.25465
circRNA 2378	SSCI-1	28.9779	15.9104	13.0676	-3.4564	10.9769		8.92966
circRNA 2378	SSCI-1	29.2475	15.7274	13.5201	-3.00387	8.02147		6.52543
circRNA 2378	SSCI-1	28.7365	15.393	13.3435	-3.18044	9.06584		7.37502
circRNA 2378	SSCI-2	29.7337	15.7113	14.0224	-2.50155	5.66292		4.60677
circRNA 2378	SSCI-2	29.5838	15.9105	13.6734	-2.85059	7.21297		5.86772
circRNA 2378	SSCI-2	29.4907	15.6459	13.8448	-2.67915	6.40479		5.21027
circRNA 2378	SSCI-3	28.1392	15.4394	12.6998	-3.82419	14.1643		11.5226
circRNA 2378	SSCI-3	27.8171	15.4546	12.3625	-4.16146	17.8947		14.5573
circRNA 2378	SSCI-3	27.9417	15.4089	12.5328	-3.99119	15.9026		12.9367

## Sheet: circRNA 0617
Target	Sample	circRNA 0617 Mean Cq	ACTB Mean Cq	∆ct	∆∆ct	2^-∆∆ct	MEAN	Expression
circRNA 0617	sham						0.940862	1
circRNA 0617	SSCI-1						4.13871	4.39885
circRNA 0617	SSCI-2						6.08297	6.46532
circRNA 0617	SSCI-3						9.25846	9.8404
circRNA 0617	sham-1	31.376	16.2081	15.1679	0	1		1.06286
circRNA 0617	sham-1	31.0729	15.751	15.3219	0.154007	0.898751		0.955242
circRNA 0617	sham-1	30.8641	15.5864	15.2777	0.10983	0.926697		0.984945
circRNA 0617	SSCI-1	29.3741	15.9104	13.4637	-1.70414	3.25836		3.46316
circRNA 0617	SSCI-1	28.8768	15.7274	13.1494	-2.0185	4.05162		4.30628
circRNA 0617	SSCI-1	28.136	15.393	12.743	-2.4249	5.3699		5.70743
circRNA 0617	SSCI-2	28.4042	15.7113	12.6929	-2.47497	5.55957		5.90902
circRNA 0617	SSCI-2	28.322	15.9105	12.4115	-2.75636	6.75688		7.18159
circRNA 0617	SSCI-2	28.2308	15.6459	12.5849	-2.583	5.99182		6.36844
circRNA 0617	SSCI-3	27.399	15.4394	11.9597	-3.20823	9.24216		9.82308
circRNA 0617	SSCI-3	27.4643	15.4546	12.0097	-3.1582	8.92712		9.48824
circRNA 0617	SSCI-3	27.3109	15.4089	11.902	-3.26589	9.61902		10.2236

## Sheet: circRNA 5775
Target	Sample	circRNA 5775 Mean Cq	ACTB Mean Cq	∆ct	∆∆ct	2^-∆∆ct	MEAN	Expression
circRNA 5775	sham						0.973931	1
circRNA 5775	SSCI-1						4.54954	4.67132
circRNA 5775	SSCI-2						7.8237	8.03311
circRNA 5775	SSCI-3						6.52378	6.6984
circRNA 5775	sham-1	31.3737	16.2081	15.1656	0	1		1.02677
circRNA 5775	sham-1	31.0275	15.751	15.2765	0.11086	0.926036		0.950823
circRNA 5775	sham-1	30.7555	15.5864	15.1691	0.00346501	0.997601		1.0243
circRNA 5775	SSCI-1	29.02	15.9104	13.1096	-2.05598	4.15825		4.26955
circRNA 5775	SSCI-1	28.356	15.7274	12.6287	-2.53695	5.80362		5.95896
circRNA 5775	SSCI-1	28.5944	15.393	13.2014	-1.96424	3.90206		4.00651
circRNA 5775	SSCI-2	27.9268	15.7113	12.2155	-2.95011	7.72807		7.93492
circRNA 5775	SSCI-2	27.8487	15.9105	11.9383	-3.22734	9.36539		9.61607
circRNA 5775	SSCI-2	28.0854	15.6459	12.4395	-2.7261	6.61666		6.79377
circRNA 5775	SSCI-3	28.2216	15.4394	12.7822	-2.38341	5.21767		5.35733
circRNA 5775	SSCI-3	28.0155	15.4546	12.5609	-2.60472	6.08273		6.24555
circRNA 5775	SSCI-3	27.4455	15.4089	12.0366	-3.129	8.74827		8.98244

## Sheet: circRNA 3621
Target	Sample	circRNA 3621 Mean Cq	ACTB Mean Cq	∆ct	∆∆ct	2^-∆∆ct	MEAN	Expression
circRNA 3621	sham						0.94905	1
circRNA 3621	SSCI-1						5.68538	5.9906
circRNA 3621	SSCI-2						5.99477	6.3166
circRNA 3621	SSCI-3						6.85565	7.22369
circRNA 3621	sham-1	21.2368	16.2081	5.02877	0	1		1.05368
circRNA 3621	sham-1	20.766	15.751	5.01504	-0.0137295	1.00956		1.06376
circRNA 3621	sham-1	20.8552	15.5864	5.26883	0.24006	0.84671		0.892166
circRNA 3621	SSCI-1	18.3753	15.9104	2.46496	-2.56381	5.91268		6.2301
circRNA 3621	SSCI-1	18.0815	15.7274	2.35411	-2.67466	6.38487		6.72764
circRNA 3621	SSCI-1	18.1385	15.393	2.74547	-2.2833	4.86792		5.12925
circRNA 3621	SSCI-2	17.9786	15.7113	2.26732	-2.76145	6.78077		7.1448
circRNA 3621	SSCI-2	18.2382	15.9105	2.32775	-2.70103	6.50264		6.85173
circRNA 3621	SSCI-2	18.3861	15.6459	2.74013	-2.28864	4.88594		5.14824
circRNA 3621	SSCI-3	17.6707	15.4394	2.23133	-2.79744	6.95207		7.32529
circRNA 3621	SSCI-3	17.4804	15.4546	2.02579	-3.00298	8.01652		8.44689
circRNA 3621	SSCI-3	17.9062	15.4089	2.49731	-2.53146	5.78156		6.09194

## Sheet: circRNA 5664
Target	Sample	circRNA 5664 Mean Cq	ACTB Mean Cq	∆ct	∆∆ct	2^-∆∆ct	MEAN	Expression
circRNA 5664	sham						1.04679	1
circRNA 5664	SSCI-1						0.467697	0.446792
circRNA 5664	SSCI-2						0.27452	0.262249
circRNA 5664	SSCI-3						0.0684044	0.0653469
circRNA 5664	sham-1	30.7583	16.2081	14.5503	0	1		0.955303
circRNA 5664	sham-1	30.2214	15.751	14.4704	-0.0798892	1.05694		1.00969
circRNA 5664	sham-1	30.0187	15.5864	14.4322	-0.118021	1.08524		1.03674
circRNA 5664	SSCI-1	31.5673	15.9104	15.657	1.10669	0.46436		0.443604
circRNA 5664	SSCI-1	31.3192	15.7274	15.5918	1.04158	0.485795		0.464082
circRNA 5664	SSCI-1	31.0841	15.393	15.6911	1.1408	0.453509		0.433238
circRNA 5664	SSCI-2	32.4472	15.7113	16.7359	2.18561	0.219819		0.209993
circRNA 5664	SSCI-2	32.2851	15.9105	16.3747	1.82441	0.282356		0.269735
circRNA 5664	SSCI-2	31.7812	15.6459	16.1353	1.58503	0.333318		0.318419
circRNA 5664	SSCI-3	33.7254	15.4394	18.286	3.73573	0.0750643		0.0717091
circRNA 5664	SSCI-3	33.7019	15.4546	18.2473	3.69703	0.0771052		0.0736588
circRNA 5664	SSCI-3	34.1357	15.4089	18.7268	4.17655	0.0553012		0.0528294

## Sheet: circRNA 4426
Target	Sample	circRNA 4426 Mean Cq	ACTB Mean Cq	∆ct	∆∆ct	2^-∆∆ct	MEAN	Expression
circRNA 4426	sham						0.839395	1
circRNA 4426	SSCI-1						0.424003	0.50513
circRNA 4426	SSCI-2						0.356303	0.424476
circRNA 4426	SSCI-3						0.465337	0.554372
circRNA 4426	sham-1	23.9154	16.2081	7.70735	0	1		1.19133
circRNA 4426	sham-1	24.0876	15.751	8.33661	0.629263	0.646507		0.770206
circRNA 4426	sham-1	23.4222	15.5864	7.83582	0.128473	0.914799		1.08983
circRNA 4426	SSCI-1	24.5467	15.9104	8.63637	0.929019	0.525215		0.625707
circRNA 4426	SSCI-1	24.9635	15.7274	9.23615	1.5288	0.346566		0.412876
circRNA 4426	SSCI-1	24.3561	15.393	8.96309	1.25574	0.418778		0.498905
circRNA 4426	SSCI-2	24.9312	15.7113	9.21988	1.51252	0.350497		0.41756
circRNA 4426	SSCI-2	24.9202	15.9105	9.00973	1.30238	0.405458		0.483036
circRNA 4426	SSCI-2	25.0049	15.6459	9.35892	1.65157	0.318294		0.379194
circRNA 4426	SSCI-3	24.4278	15.4394	8.98841	1.28106	0.411493		0.490226
circRNA 4426	SSCI-3	24.4345	15.4546	8.97992	1.27257	0.413922		0.493119
circRNA 4426	SSCI-3	23.8736	15.4089	8.46468	0.757328	0.591591		0.704783

## Sheet: circRNA 1617
Target	Sample	circRNA 1617 Mean Cq	ACTB Mean Cq	∆ct	∆∆ct	2^-∆∆ct	MEAN	Expression
circRNA 1617	sham						0.853345	1
circRNA 1617	SSCI-1						0.183863	0.215462
circRNA 1617	SSCI-2						0.223779	0.262237
circRNA 1617	SSCI-3						0.337701	0.395738
circRNA 1617	sham-1	24.3061	16.2081	8.098	0	1		1.17186
circRNA 1617	sham-1	24.2886	15.751	8.53757	0.439565	0.737357		0.864079
circRNA 1617	sham-1	23.9312	15.5864	8.34484	0.246834	0.842744		0.987577
circRNA 1617	SSCI-1	26.3417	15.9104	10.4314	2.33335	0.198423		0.232524
circRNA 1617	SSCI-1	25.8562	15.7274	10.1289	2.03086	0.244709		0.286765
circRNA 1617	SSCI-1	26.4567	15.393	11.0637	2.96568	0.12801		0.150009
circRNA 1617	SSCI-2	25.8996	15.7113	10.1882	2.09025	0.23484		0.2752
circRNA 1617	SSCI-2	25.9692	15.9105	10.0588	1.96076	0.256893		0.301042
circRNA 1617	SSCI-2	26.1725	15.6459	10.5266	2.42856	0.185751		0.217675
circRNA 1617	SSCI-3	25.1673	15.4394	9.72792	1.62992	0.323106		0.378635
circRNA 1617	SSCI-3	24.9401	15.4546	9.48549	1.38748	0.382231		0.447921
circRNA 1617	SSCI-3	25.1881	15.4089	9.77914	1.68114	0.311836		0.365428

## Sheet: circRNA 0586
Target	Sample	circRNA 0586 Mean Cq	ACTB Mean Cq	∆ct	∆∆ct	2^-∆∆ct	MEAN	Expression
circRNA 0586	sham						0.891981	1
circRNA 0586	SSCI-1						0.259883	0.291355
circRNA 0586	SSCI-2						0.272547	0.305552
circRNA 0586	SSCI-3						0.333617	0.374018
circRNA 0586	sham-1	25.7378	16.2081	9.52977	0	1		1.1211
circRNA 0586	sham-1	25.232	15.751	9.48101	-0.0487597	1.03438		1.15964
circRNA 0586	sham-1	25.6597	15.5864	10.0733	0.543503	0.686103		0.76919
circRNA 0586	SSCI-1	26.9282	15.9104	11.0178	1.48806	0.35649		0.399661
circRNA 0586	SSCI-1	27.1176	15.7274	11.3902	1.86046	0.275389		0.308739
circRNA 0586	SSCI-1	27.4064	15.393	12.0134	2.48367	0.178789		0.20044
circRNA 0586	SSCI-2	26.855	15.7113	11.1437	1.61393	0.326707		0.366271
circRNA 0586	SSCI-2	27.0522	15.9105	11.1417	1.61193	0.32716		0.366779
circRNA 0586	SSCI-2	27.5761	15.6459	11.9302	2.40041	0.189411		0.212349
circRNA 0586	SSCI-3	26.3378	15.4394	10.8984	1.36866	0.387252		0.434148
circRNA 0586	SSCI-3	26.7184	15.4546	11.2638	1.73402	0.300614		0.337018
circRNA 0586	SSCI-3	26.5872	15.4089	11.1783	1.64854	0.318963		0.35759

## Sheet: circRNA 3111
Target	Sample	circRNA 3111 Mean Cq	ACTB Mean Cq	∆ct	∆∆ct	2^-∆∆ct	MEAN	Expression
circRNA 3111	sham						0.882549	1
circRNA 3111	SSCI-1						0.281526	0.318992
circRNA 3111	SSCI-2						0.431396	0.488807
circRNA 3111	SSCI-3						0.338202	0.38321
circRNA 3111	sham-1	25.8502	16.2081	9.64213	0	1		1.13308
circRNA 3111	sham-1	25.5008	15.751	9.74984	0.107712	0.928059		1.05157
circRNA 3111	sham-1	25.6616	15.5864	10.0752	0.433042	0.740698		0.839271
circRNA 3111	SSCI-1	26.7629	15.9104	10.8525	1.21039	0.432151		0.489663
circRNA 3111	SSCI-1	27.2837	15.7274	11.5564	1.91423	0.265313		0.300622
circRNA 3111	SSCI-1	27.3965	15.393	12.0035	2.36136	0.194608		0.220506
circRNA 3111	SSCI-2	26.6233	15.7113	10.912	1.26982	0.414712		0.469902
circRNA 3111	SSCI-2	26.4857	15.9105	10.5752	0.933069	0.523743		0.593443
circRNA 3111	SSCI-2	26.7239	15.6459	11.078	1.43586	0.369627		0.418817
circRNA 3111	SSCI-3	26.2816	15.4394	10.8423	1.20012	0.435239		0.493161
circRNA 3111	SSCI-3	27.1093	15.4546	11.6547	2.01254	0.247836		0.280818
circRNA 3111	SSCI-3	26.5305	15.4089	11.1216	1.47947	0.358622		0.406347
