# Supplementary material for: Expression profiles of circular RNAs and interaction networks of competing endogenous RNAs in neurogenic bladder of rats following suprasacral spinal cord injury
Source: PeerJ. 2023 Sep 18;11:e16042. doi: 10.7717/peerj.16042 (PMC10512963; doi:10.7717/peerj.16042)
Supplement: Supplemental Information 14 [file peerj-11-16042-s014.xlsx]

## Sheet: up-regulated (SSCI–1 vs. sham)
id	Term	Category	GO_classify2	ListHits	ListTotal	PopHits	PopTotal	p-value	q-value	Enrichment_score	Gene
GO:0000015	phosphopyruvate hydratase complex	cellular_component	cell|cell part|macromolecular complex	1	1755	5	19037	0.38347	0.688406	2.16946	Eno1
GO:0000045	autophagosome assembly	biological_process	cellular component organization or biogenesis|cellular process|metabolic process	2	1755	55	19037	0.967935	0.991668	0.394447	LOC100912399;Tp53inp2
GO:0000050	urea cycle	biological_process	cellular process|metabolic process	1	1755	9	19037	0.581326	0.772752	1.20525	Arg1
GO:0000054	ribosomal subunit export from nucleus	biological_process	cellular component organization or biogenesis|establishment of localization|localization	1	1755	6	19037	0.440322	0.704458	1.80788	Ran
GO:0000055	ribosomal large subunit export from nucleus	biological_process	cellular component organization or biogenesis|establishment of localization|localization	1	1755	9	19037	0.581326	0.772752	1.20525	Ran
GO:0000056	ribosomal small subunit export from nucleus	biological_process	cellular component organization or biogenesis|establishment of localization|localization	1	1755	6	19037	0.440322	0.704458	1.80788	Ran
GO:0000060	protein import into nucleus, translocation	biological_process	establishment of localization|localization	5	1755	30	19037	0.137396	0.406826	1.80788	Bcl3;Pola2;Ran;Sec61b;Tgfb1
GO:0000062	fatty-acyl-CoA binding	molecular_function	binding	2	1755	25	19037	0.684879	0.824954	0.867783	Dbi;Soat1
GO:0000070	mitotic sister chromatid segregation	biological_process	cellular component organization or biogenesis|cellular process	14	1755	27	19037	1.92485e-08	2.03489e-06	5.62452	Cdca8;Cit;Dsn1;Espl1;Kif18a;Kif18b;Knstrn;Mad2l1;Nek2;Nsl1;Nusap1;Plk1;Ran;Spag5
GO:0000076	DNA replication checkpoint	biological_process	biological regulation|cellular process|negative regulation of biological process|regulation of biological process	2	1755	7	19037	0.130648	0.394341	3.09923	Cdt1;Timeless
GO:0000077	DNA damage checkpoint	biological_process	biological regulation|cellular process|negative regulation of biological process|regulation of biological process|response to stimulus	4	1755	29	19037	0.276247	0.62225	1.49618	Chek1;Clspn;E2f1;H2afx
GO:0000079	regulation of cyclin-dependent protein serine/threonine kinase activity	biological_process	biological regulation|cellular process|metabolic process|regulation of biological process	3	1755	15	19037	0.154716	0.444764	2.16946	Ccnyl1;Cdkn2b;Rgcc
GO:0000082	G1/S transition of mitotic cell cycle	biological_process	cellular process	11	1755	64	19037	0.0310091	0.179142	1.86438	Camk2b;Ccne1;Cdkn3;E2f1;Inhba;Iqgap3;Itgb1;Plk3;Pole;RGD1560020_predicted;Tcf19
GO:0000086	G2/M transition of mitotic cell cycle	biological_process	cellular process	10	1755	38	19037	0.00183916	0.0261458	2.85455	Birc5;Ccna2;Cdc25c;Cdkn2b;Chek1;Cit;Foxm1;Mastl;Plcb1;Plk1
GO:0000122	negative regulation of transcription by RNA polymerase II	biological_process	biological regulation|cellular process|metabolic process|negative regulation of biological process|regulation of biological process	72	1755	802	19037	0.613912	0.789613	0.973822	Ankrd1;Aurkb;Bcl6b;Bend6;Bhlhe40;Brms1;Calr;Ccne1;Ciita;E2f1;E2f7;E2f8;Edn1;Ednrb;Egr1;En1;Eng;Eno1;Eomes;Fgf9;Foxc2;Foxj1;Foxm1;Foxs1;Fst;Glis1;Glis3;H2afy2;Hcls1;Heyl;Hist1h1b;Hist1h1d;Hmga2;Ikzf1;Il1b;Irf8;LOC684828;Loxl2;Lrp8;Mapk10;Mcph1;Mdfi;Met;Msc;Mxd3;Nfil3;Nr4a3;Phf19;Plk1;Plk3;Prdm1;Rbl1;RGD1560020_predicted;Ripply1;Ripply3;Runx3;Skil;Snai1;Sox11;Sox18;Spi1;Suv39h2;Tbx21;Tcfl5;Tgfb1;Ti…
GO:0000132	establishment of mitotic spindle orientation	biological_process	cellular component organization or biogenesis|cellular process|establishment of localization|localization	6	1755	23	19037	0.0155785	0.113681	2.82973	Cenpa;Dynlt1;Mcph1;Ndc80;Sapcd2;Spry1
GO:0000137	Golgi cis cisterna	cellular_component	cell|cell part|organelle|organelle part	1	1755	9	19037	0.581326	0.772752	1.20525	Lyz2
GO:0000139	Golgi membrane	cellular_component	cell|cell part|membrane|organelle|organelle part	31	1755	340	19037	0.553809	0.767189	0.989018	Abcb1b;Abcb4;Adora2a;B3galnt1;B3gnt3;Cav3;Chst10;Chst11;Chst4;Edem1;Fam198b;Ftcd;Galnt16;Gbp2;Gja1;Hpd;Litaf;Mall;Pmepa1;Rgs19;Sec24d;Slc39a13;Srgn;St6galnac1;St8sia2;Steap4;Syndig1;Tfg;Tmem132a;Tmem59l;Ykt6
GO:0000146	microfilament motor activity	molecular_function	catalytic activity	4	1755	17	19037	0.0648145	0.280328	2.5523	Myh1;Myh10;Myh3;Myo7a
GO:0000147	actin cortical patch assembly	biological_process	cellular component organization or biogenesis|cellular process	1	1755	5	19037	0.38347	0.688406	2.16946	Was
GO:0000149	SNARE binding	molecular_function	binding	5	1755	71	19037	0.795302	0.884207	0.763894	Picalm;Sec24d;Snap91;Syt10;Ykt6
GO:0000150	recombinase activity	molecular_function	catalytic activity	2	1755	6	19037	0.0992091	0.333151	3.61576	Rad51;Rad51c
GO:0000151	ubiquitin ligase complex	cellular_component	cell|cell part|macromolecular complex	2	1755	99	19037	0.999248	1	0.219137	Rnf144a;Ube2c
GO:0000165	MAPK cascade	biological_process	biological regulation|cellular process|metabolic process|regulation of biological process|response to stimulus|signaling	14	1755	103	19037	0.0905559	0.330931	1.47439	Adra2b;Ccl2;Ccl5;Ccr5;Epgn;Il18;Il1b;Map2k3;Mapk10;Nrg1;Pak1;Ret;Scg2;Tgfb1
GO:0000166	nucleotide binding	molecular_function	binding	7	1755	49	19037	0.161393	0.448809	1.54961	Adcy2;Hist1h1d;Impdh1;LOC103689983;Pole;Prtfdc1;Tyms
GO:0000172	ribonuclease MRP complex	cellular_component	cell|cell part|macromolecular complex	1	1755	6	19037	0.440322	0.704458	1.80788	Rpp25
GO:0000175	3'-5'-exoribonuclease activity	molecular_function	catalytic activity	1	1755	17	19037	0.806977	0.889729	0.638076	Rexo2
GO:0000177	cytoplasmic exosome (RNase complex)	cellular_component	cell|cell part|macromolecular complex	1	1755	13	19037	0.715711	0.839021	0.834407	Carhsp1
GO:0000185	activation of MAPKKK activity	biological_process	biological regulation|cellular process|metabolic process|positive regulation of biological process|regulation of biological process|response to stimulus|signaling	2	1755	18	19037	0.5042	0.743341	1.20525	Gadd45b;Gadd45g
GO:0000186	activation of MAPKK activity	biological_process	biological regulation|cellular process|metabolic process|positive regulation of biological process|regulation of biological process|response to stimulus|signaling	6	1755	44	19037	0.216002	0.535178	1.47918	Adam9;Adora1;F2r;Gadd45b;Gadd45g;Pak1
GO:0000187	activation of MAPK activity	biological_process	biological regulation|cellular process|metabolic process|positive regulation of biological process|regulation of biological process|response to stimulus|signaling	17	1755	86	19037	0.00197083	0.0270142	2.14423	Adra2b;Cd74;Epgn;Erp29;Fcer1a;Igf1;Il1b;Iqgap3;Map2k3;Met;Nrg1;Prok2;Ptprc;Syk;Tgfb3;Thbs1;Tp73
GO:0000188	inactivation of MAPK activity	biological_process	biological regulation|cellular process|metabolic process|negative regulation of biological process|regulation of biological process|response to stimulus|signaling	4	1755	22	19037	0.138926	0.40793	1.97224	Dusp2;Dusp4;Lax1;Spred3
GO:0000209	protein polyubiquitination	biological_process	cellular process|metabolic process	5	1755	127	19037	0.992988	1	0.427059	Dtl;March1;Rnf144a;Ube2c;Ube2t
GO:0000212	meiotic spindle organization	biological_process	cellular component organization or biogenesis|cellular process|reproduction|reproductive process	2	1755	8	19037	0.163948	0.448809	2.71182	Aurka;Espl1
GO:0000226	microtubule cytoskeleton organization	biological_process	cellular component organization or biogenesis|cellular process	16	1755	109	19037	0.0417068	0.217503	1.59226	Aurka;Birc5;Cdk1;Crmp1;Gas2l3;LOC100909441;Map1b;Ran;Tacc3;Tuba1a;Tuba1b;Tubb1;Tubb2a;Tubb2b;Tubb3;Tubb5
GO:0000228	nuclear chromosome	cellular_component	cell|cell part|membrane-enclosed lumen|organelle|organelle part	11	1755	32	19037	8.21688e-05	0.00256544	3.72876	Birc5;Fignl1;Hist1h2ao;Hist1h3a;Hist2h4;Hmga2;Ncapd2;Rad51;Smc2;Timeless;Top2a
GO:0000242	pericentriolar material	cellular_component	cell|cell part|organelle|organelle part	1	1755	21	19037	0.868956	0.925897	0.516538	Lck
GO:0000245	spliceosomal complex assembly	biological_process	cellular component organization or biogenesis|cellular process|metabolic process	1	1755	23	19037	0.892028	0.93985	0.471621	Lsm4
GO:0000266	mitochondrial fission	biological_process	cellular component organization or biogenesis|cellular process	2	1755	22	19037	0.614978	0.789613	0.986118	Mtfr2;Mx1
GO:0000278	mitotic cell cycle	biological_process	cellular process	34	1755	112	19037	2.13271e-10	4.0464e-08	3.29293	Aurka;Ccnb1;Cdc6;Cdca5;Cdk1;Cdt1;Cenpe;Cenpf;Cenpt;Cenpw;Cit;Espl1;Kif18b;LOC100909441;Mastl;Mybl1;Mybl2;Pbk;Plk1;Pole;RGD1560020_predicted;Rgs14;Rrm1;Rrm2;Ska1;Ska2;Tuba1a;Tuba1b;Tubb1;Tubb2a;Tubb2b;Tubb3;Tubb5;Wdhd1
GO:0000281	mitotic cytokinesis	biological_process	cellular process	20	1755	61	19037	2.71402e-07	2.08865e-05	3.55649	Anln;Anlnl1;Birc5;Cenpa;Cep55;Cfl1;Cit;Ckap2;Ect2;Incenp;Kif20a;Kif23;Kif4a;Myh10;Nusap1;Plk1;Racgap1;Rtkn2;Sept11;Sept5
GO:0000287	magnesium ion binding	molecular_function	binding	23	1755	208	19037	0.208046	0.520961	1.19946	Adcy2;Adprhl1;Dctpp1;Eno1;Ern2;Eya2;Fen1;Fignl1;Idh1;Idi1;Mat1a;Mthfd2;Nek6;Nuak2;Pgm3;Plk1;Ppm1n;Prtfdc1;Ran;Sphk1;Stk38l;Tkt;Top2a
GO:0000289	nuclear-transcribed mRNA poly(A) tail shortening	biological_process	biological regulation|cellular process|metabolic process|negative regulation of biological process|regulation of biological process	1	1755	10	19037	0.619941	0.789613	1.08473	Samd4a
GO:0000290	deadenylation-dependent decapping of nuclear-transcribed mRNA	biological_process	biological regulation|cellular process|metabolic process|negative regulation of biological process|regulation of biological process	1	1755	10	19037	0.619941	0.789613	1.08473	Noct
GO:0000302	response to reactive oxygen species	biological_process	response to stimulus	5	1755	20	19037	0.031748	0.180637	2.71182	Gstp1;Plk3;Prdx1;Ptprn;Serpine1
GO:0000303	response to superoxide	biological_process	response to stimulus	1	1755	6	19037	0.440322	0.704458	1.80788	Ucp2
GO:0000307	cyclin-dependent protein kinase holoenzyme complex	cellular_component	cell|cell part|macromolecular complex	5	1755	25	19037	0.0744107	0.286325	2.16946	Ccna2;Ccne1;Cdk1;Cks1b;Cks2
GO:0000381	regulation of alternative mRNA splicing, via spliceosome	biological_process	biological regulation|cellular process|metabolic process|regulation of biological process	2	1755	47	19037	0.938958	0.972743	0.461587	Fblim1;Rbm11
GO:0000387	spliceosomal snRNP assembly	biological_process	cellular component organization or biogenesis|cellular process|metabolic process	1	1755	25	19037	0.911041	0.953365	0.433892	Lsm4
GO:0000400	four-way junction DNA binding	molecular_function	binding	2	1755	17	19037	0.473442	0.73204	1.27615	Rad51;Rad51c
GO:0000403	Y-form DNA binding	molecular_function	binding	1	1755	6	19037	0.440322	0.704458	1.80788	Rad18
GO:0000405	bubble DNA binding	molecular_function	binding	1	1755	6	19037	0.440322	0.704458	1.80788	Neil3
GO:0000407	phagophore assembly site	cellular_component	cell|cell part	2	1755	25	19037	0.684879	0.824954	0.867783	LOC100912399;Vmp1
GO:0000413	protein peptidyl-prolyl isomerization	biological_process	cellular process|metabolic process	2	1755	35	19037	0.84599	0.914388	0.619845	Fkbp10;Fkbp11
GO:0000421	autophagosome membrane	cellular_component	cell|cell part|membrane|organelle|organelle part	1	1755	21	19037	0.868956	0.925897	0.516538	Vmp1
GO:0000462	maturation of SSU-rRNA from tricistronic rRNA transcript (SSU-rRNA, 5.8S rRNA, LSU-rRNA)	biological_process	cellular component organization or biogenesis|cellular process|metabolic process	1	1755	31	19037	0.950251	0.979438	0.349913	Heatr1
GO:0000578	embryonic axis specification	biological_process	developmental process|multicellular organismal process	2	1755	9	19037	0.198499	0.505521	2.41051	Peg12;Stil
GO:0000707	meiotic DNA recombinase assembly	biological_process	cellular component organization or biogenesis|cellular process|metabolic process|reproduction|reproductive process|response to stimulus	2	1755	6	19037	0.0992091	0.333151	3.61576	Rad51;Rad51c
GO:0000712	resolution of meiotic recombination intermediates	biological_process	cellular component organization or biogenesis|cellular process|metabolic process|reproduction|reproductive process	3	1755	13	19037	0.111292	0.362139	2.50322	Apitd1;Eme1;Top2a
GO:0000722	telomere maintenance via recombination	biological_process	biological regulation|cellular component organization or biogenesis|cellular process|metabolic process	2	1755	10	19037	0.233788	0.556728	2.16946	Rad51;Rad51c
GO:0000723	telomere maintenance	biological_process	biological regulation|cellular component organization or biogenesis|cellular process|metabolic process	1	1755	35	19037	0.966235	0.990532	0.309923	Ccne1
GO:0000724	double-strand break repair via homologous recombination	biological_process	cellular process|metabolic process|response to stimulus	12	1755	74	19037	0.0374344	0.205639	1.75902	Aunip;Brca1;Gen1;H2afx;Mcm8;Mms22l;Rad51;Rad51ap1;Rad51c;Rad54b;Rad54l;Tonsl
GO:0000727	double-strand break repair via break-induced replication	biological_process	cellular process|metabolic process|response to stimulus	4	1755	5	19037	0.00033353	0.00697162	8.67783	Cdc45;Cdc7;Gins2;Gins4
GO:0000730	DNA recombinase assembly	biological_process	cellular component organization or biogenesis|cellular process|metabolic process|response to stimulus	2	1755	8	19037	0.163948	0.448809	2.71182	Rad51;Rad51c
GO:0000731	DNA synthesis involved in DNA repair	biological_process	cellular process|metabolic process|response to stimulus	1	1755	8	19037	0.53879	0.748901	1.35591	Pole
GO:0000733	DNA strand renaturation	biological_process	cellular component organization or biogenesis|cellular process|metabolic process	2	1755	11	19037	0.269385	0.609577	1.97224	Anxa1;Rad54l
GO:0000774	adenyl-nucleotide exchange factor activity	molecular_function	binding|enzyme regulator activity	1	1755	9	19037	0.581326	0.772752	1.20525	Bag2
GO:0000775	chromosome, centromeric region	cellular_component	cell|cell part|organelle|organelle part	20	1755	42	19037	1.24371e-10	2.77607e-08	5.16538	Birc5;Bub1;Cdca8;Cenpa;Cenpe;Cenpf;Cenpq;Cenpt;Cenpw;Dscc1;Hells;Hjurp;Incenp;Kif2c;Mad2l1;Mis18a;Mki67;Sgo1;Sgo2;Wdhd1
GO:0000776	kinetochore	cellular_component	cell|cell part|macromolecular complex|organelle|organelle part	25	1755	84	19037	7.9221e-08	6.85609e-06	3.22836	Aurkb;Bub1;Bub1b;Cdt1;Cenpe;Cenpf;Cenph;Cenpi;Cenpo;Cenpt;Cenpw;Incenp;Kif18a;Kif2c;Knstrn;Mad2l1;Mtbp;Ndc80;Nek2;Plk1;Sgo1;Sgo2;Spag5;Ttk;Zwilch
GO:0000777	condensed chromosome kinetochore	cellular_component	cell|cell part|macromolecular complex|organelle|organelle part	16	1755	44	19037	8.67471e-07	5.76606e-05	3.94447	Birc5;Bub1;Bub1b;Cenpn;Cenpt;Cenpu;Cenpw;Dsn1;Hjurp;Kif2c;Knstrn;Ndc80;Nsl1;Nuf2;Pmf1;Spc25
GO:0000778	condensed nuclear chromosome kinetochore	cellular_component	cell|cell part|macromolecular complex|membrane-enclosed lumen|organelle|organelle part	7	1755	9	19037	1.70452e-06	0.000100231	8.43678	Bub1;Bub1b;Cenpa;Cenpe;Mis18bp1;Ndc80;Nuf2
GO:0000779	condensed chromosome, centromeric region	cellular_component	cell|cell part|organelle|organelle part	6	1755	9	19037	4.00194e-05	0.00139025	7.23153	Aurkb;Cenpe;Ncapd2;Ncapg;Sgo1;Sgo2
GO:0000780	condensed nuclear chromosome, centromeric region	cellular_component	cell|cell part|membrane-enclosed lumen|organelle|organelle part	7	1755	18	19037	0.000713579	0.0127079	4.21839	Aurka;Aurkb;Bub1;Cenpa;Plk1;Sgo1;Sgo2
GO:0000781	chromosome, telomeric region	cellular_component	cell|cell part|organelle|organelle part	3	1755	43	19037	0.770973	0.872666	0.756788	Chek1;Eid3;H2afx
GO:0000784	nuclear chromosome, telomeric region	cellular_component	cell|cell part|membrane-enclosed lumen|organelle|organelle part	2	1755	73	19037	0.992853	1	0.297186	Fen1;Rad51
GO:0000785	chromatin	cellular_component	cell|cell part|organelle|organelle part	23	1755	137	19037	0.00344978	0.0414058	1.82108	Asf1b;Cdca5;Chek1;Dscc1;Esco2;Fam111a;H2afx;H2afy2;Hist1h1d;Kif22;Loxl2;Mcm2;Mis18a;Mtbp;Parpbp;Plk1;Plk3;Rad18;Rad51;Ran;Rbl1;Suv39h2;Tp73
GO:0000786	nucleosome	cellular_component	cell|cell part|macromolecular complex|organelle|organelle part	41	1755	80	19037	6.68742e-22	6.59781e-19	5.55924	Cenpa;H2afx;H2afy2;Hist1h1a;Hist1h1b;Hist1h2ac;Hist1h2ah;Hist1h2ai;Hist1h2ail1;Hist1h2ak;Hist1h2an;Hist1h2ao;Hist1h2ba;Hist1h2bcl1;Hist1h2bd;Hist1h2bf;Hist1h2bh;Hist1h2bk;Hist1h2bl;Hist1h2bo;Hist1h3a;Hist2h2aa3;Hist2h2ac;Hist2h3c2;Hist2h4;Hist3h2bb;LOC100359692;LOC100360754;LOC100365043;LOC100910200;LOC100910554;LOC102548682;LOC102549061;LOC102549173;LOC103690190;LOC680498;LOC684762;LOC684773;LOC…
GO:0000788	nuclear nucleosome	cellular_component	cell|cell part|macromolecular complex|membrane-enclosed lumen|organelle|organelle part	8	1755	21	19037	0.000348682	0.00699206	4.1323	Cenpa;Cenpt;Hist1h1d;Hist1h2ao;Hist1h2ba;Hist1h3a;Hist2h4;Hist2h4a
GO:0000790	nuclear chromatin	cellular_component	cell|cell part|membrane-enclosed lumen|organelle|organelle part	38	1755	216	19037	7.68056e-05	0.00245269	1.90832	Asf1b;Cdca5;Chaf1a;Chaf1b;Dntt;E2f1;Eme1;Gata4;H2afx;H2afy2;Hist1h1a;Hist1h1b;Hist1h2ac;Hist1h2ah;Hist1h2ai;Hist1h2ak;Hist1h2an;Hist1h2ao;Hist2h2aa3;Hist2h2ac;Hmgb2;Hmgb2l1;LOC100360754;LOC100910554;LOC103690190;LOC680322;LOC684773;LOC684828;LOC690131;Muc1;Plcb1;Rad51;Rad51ap1;Runx3;Sox18;Spi1;Timeless;Uhrf1
GO:0000791	euchromatin	cellular_component	cell|cell part|organelle|organelle part	2	1755	10	19037	0.233788	0.556728	2.16946	Dntt;Uhrf1
GO:0000792	heterochromatin	cellular_component	cell|cell part|organelle|organelle part	1	1755	36	19037	0.969354	0.991668	0.301314	Uhrf1
GO:0000793	condensed chromosome	cellular_component	cell|cell part|organelle	10	1755	38	19037	0.00183916	0.0261458	2.85455	Brca1;Fancd2;Hmgb2;Hmgb2l1;Mki67;Ncapd2;Ncapg;Rad51;Smc2;Top2a
GO:0000794	condensed nuclear chromosome	cellular_component	cell|cell part|membrane-enclosed lumen|organelle|organelle part	6	1755	42	19037	0.186439	0.495742	1.54961	Brca1;Ccdc36;Chek1;H2afx;Nek2;Rad51
GO:0000795	synaptonemal complex	cellular_component	cell|cell part|membrane-enclosed lumen|organelle|organelle part	4	1755	26	19037	0.214094	0.531251	1.66881	Incenp;P3h4;Plk1;Tex12
GO:0000796	condensin complex	cellular_component	cell|cell part|macromolecular complex|organelle|organelle part	5	1755	7	19037	0.000118632	0.00323323	7.74807	Ncapd2;Ncapg;Ncapg2;Smc2;Smc4
GO:0000800	lateral element	cellular_component	cell|cell part|membrane-enclosed lumen|organelle|organelle part	3	1755	22	19037	0.331103	0.688406	1.47918	Brca1;Incenp;Rad51
GO:0000801	central element	cellular_component	cell|cell part|membrane-enclosed lumen|organelle|organelle part	2	1755	8	19037	0.163948	0.448809	2.71182	Incenp;Tex12
GO:0000808	origin recognition complex	cellular_component	cell|cell part|macromolecular complex|organelle|organelle part	1	1755	6	19037	0.440322	0.704458	1.80788	Orc6
GO:0000822	inositol hexakisphosphate binding	molecular_function	binding	1	1755	5	19037	0.38347	0.688406	2.16946	Snap91
GO:0000900	translation repressor activity, mRNA regulatory element binding	molecular_function	binding|translation regulator activity	2	1755	11	19037	0.269385	0.609577	1.97224	Dhfr;Tyms
GO:0000902	cell morphogenesis	biological_process	cellular component organization or biogenesis|cellular process|developmental process	14	1755	104	19037	0.0962268	0.333151	1.46021	Adam8;Cdh11;Cdh24;Ect2;Ephb2;Grem1;Lst1;Nckap1l;Nox4;Nrg1;Ptpro;Rac2;Tgfb2;Unc93b1
GO:0000910	cytokinesis	biological_process	NA	7	1755	31	19037	0.0204341	0.134142	2.44939	Birc5;Klhl13;Naip6;Nlrc4;Pak1;Rnd1;Rnd3
GO:0000915	actomyosin contractile ring assembly	biological_process	cellular component organization or biogenesis|cellular process	5	1755	7	19037	0.000118632	0.00323323	7.74807	Anln;Anlnl1;Kif23;Racgap1;Rtkn2
GO:0000920	cell separation after cytokinesis	biological_process	cellular process	2	1755	16	19037	0.441554	0.704458	1.35591	Cep55;Kif20a
GO:0000921	septin ring assembly	biological_process	cellular component organization or biogenesis|cellular process	2	1755	14	19037	0.37477	0.688406	1.54961	Sept11;Sept5
GO:0000922	spindle pole	cellular_component	cell|cell part|organelle|organelle part	19	1755	100	19037	0.00179916	0.0257253	2.06099	Aspm;Aunip;Ccnb1;Cdc20;Cdc6;Cenpf;Dsn1;Kif11;Knstrn;Kntc1;LOC108348136;Mad2l1;Nedd9;Nek2;Nek6;Plk1;Rgs14;Sgo1;Tpx2
GO:0000932	P-body	cellular_component	cell|cell part|macromolecular complex|organelle	7	1755	74	19037	0.529756	0.748901	1.0261	Apobec3b;Carhsp1;Lsm4;Noct;Samd4a;Zc3h12a;Zc3h12d
GO:0000940	condensed chromosome outer kinetochore	cellular_component	cell|cell part|macromolecular complex|organelle|organelle part	5	1755	10	19037	0.00112276	0.0173448	5.42365	Bub1b;Cenpe;Cenpf;Ska1;Ska2
GO:0000956	nuclear-transcribed mRNA catabolic process	biological_process	biological regulation|cellular process|metabolic process|negative regulation of biological process|regulation of biological process	1	1755	16	19037	0.787358	0.877748	0.677956	Lsm4
GO:0000976	transcription regulatory region sequence-specific DNA binding	molecular_function	binding	6	1755	83	19037	0.788578	0.87891	0.784142	Egr1;Foxj1;Klhl6;Nfe2;Sox11;Suv39h2
GO:0000977	RNA polymerase II regulatory region sequence-specific DNA binding	molecular_function	binding	25	1755	288	19037	0.654736	0.810409	0.941605	Bcl6b;Creb3l4;E2f3;E2f7;Egr1;Eno1;Eomes;Foxm1;Gata4;Gbx2;Glis1;Glis3;H2afy2;Ikzf1;Irf8;Mxd3;Nfil3;Nr4a1;Nr4a3;Pax9;Plagl1;Runx3;Snai1;Suv39h2;Zic3
GO:0000978	RNA polymerase II proximal promoter sequence-specific DNA binding	molecular_function	binding	40	1755	423	19037	0.457152	0.726291	1.02575	Arnt2;Bcl11b;Cebpd;Cebpe;E2f8;Egr2;En1;Erg;Etv4;Foxj1;Foxs1;Gata4;Glis3;Ikzf1;Irf8;Litaf;Meox1;Muc1;Mybl1;Mybl2;Mycn;Ndn;Nfil3;Nr4a1;Nr4a3;Pax8;Pgr;Pou2f2;Prdm1;RGD1560020_predicted;Skil;Sox18;Sox21;Spi1;Spic;Tcfl5;Tead4;Tfec;Tp73;Zic3
GO:0000979	RNA polymerase II core promoter sequence-specific DNA binding	molecular_function	binding	6	1755	37	19037	0.120648	0.390266	1.75902	Egr1;Gbx2;Heyl;Pax8;Sox11;Wbp2nl
GO:0000980	RNA polymerase II distal enhancer sequence-specific DNA binding	molecular_function	binding	4	1755	66	19037	0.869109	0.925897	0.657412	Ikzf1;Msc;Spi1;Spib
GO:0000981	RNA polymerase II transcription factor activity, sequence-specific DNA binding	molecular_function	NA	21	1755	215	19037	0.423972	0.704458	1.0595	Arnt2;Bhlhe40;E2f1;Erg;Etv4;Foxc2;Foxj1;Foxm1;Foxs1;Gata4;Mybl1;Mybl2;Plagl1;Pttg1;RGD1560020_predicted;Runx3;Sox18;Spi1;Spib;Spic;Tp73
GO:0000982	transcription factor activity, RNA polymerase II proximal promoter sequence-specific DNA binding	molecular_function	NA	3	1755	33	19037	0.597558	0.787117	0.986118	Arntl2;Egr1;Spi1
GO:0000983	transcription factor activity, RNA polymerase II core promoter sequence-specific DNA binding	molecular_function	NA	1	1755	14	19037	0.741937	0.853711	0.774807	Heyl
GO:0000987	proximal promoter sequence-specific DNA binding	molecular_function	binding	2	1755	32	19037	0.807845	0.889729	0.677956	Nfe2;Uhrf1
GO:0000989	transcription factor activity, transcription factor binding	molecular_function	NA	2	1755	24	19037	0.662814	0.815174	0.903941	Heyl;Hmga2
GO:0001012	RNA polymerase II regulatory region DNA binding	molecular_function	binding	1	1755	14	19037	0.741937	0.853711	0.774807	Rbl1
GO:0001046	core promoter sequence-specific DNA binding	molecular_function	binding	2	1755	44	19037	0.922672	0.962881	0.493059	Meox1;Nr4a3
GO:0001047	core promoter binding	molecular_function	binding	6	1755	68	19037	0.606256	0.789613	0.957114	E2f1;E2f3;E2f7;E2f8;Hmga2;Spi1
GO:0001076	transcription factor activity, RNA polymerase II transcription factor binding	molecular_function	NA	1	1755	37	19037	0.972184	0.991684	0.29317	Gata4
GO:0001077	transcriptional activator activity, RNA polymerase II proximal promoter sequence-specific DNA binding	molecular_function	NA	32	1755	292	19037	0.174108	0.47373	1.18874	Arnt2;Bcl11b;Cebpd;Cebpe;Egr1;Egr2;Foxc2;Foxj1;Glis3;Heyl;Hmga2;Meox1;Mybl1;Mybl2;Mycn;Ndn;Nr4a1;Nr4a3;Pax8;Pgr;Pou2f2;RGD1560020_predicted;Sox11;Sox18;Sox21;Spi1;Spic;Tead4;Tfec;Tp73;Wt1;Zic3
GO:0001078	transcriptional repressor activity, RNA polymerase II proximal promoter sequence-specific DNA binding	molecular_function	NA	15	1755	150	19037	0.410274	0.704458	1.08473	Bhlhe40;E2f8;En1;Eno1;Foxs1;Glis3;Hmga2;Irf8;Nfil3;Prdm1;Rbl1;Skil;Snai1;Spi1;Tcfl5
GO:0001085	RNA polymerase II transcription factor binding	molecular_function	binding	5	1755	66	19037	0.739651	0.853711	0.821765	Ankrd1;Gata4;Hcls1;Spi1;Tead4
GO:0001102	RNA polymerase II activating transcription factor binding	molecular_function	binding	4	1755	48	19037	0.657157	0.811427	0.903941	Bhlhe40;Egr2;Eomes;Rbl1
GO:0001104	RNA polymerase II transcription cofactor activity	molecular_function	NA	1	1755	37	19037	0.972184	0.991684	0.29317	LOC100911917
GO:0001105	RNA polymerase II transcription coactivator activity	molecular_function	NA	4	1755	46	19037	0.623375	0.793168	0.943243	Ankrd1;Brca1;Sox11;Wbp2nl
GO:0001106	RNA polymerase II transcription corepressor activity	molecular_function	NA	2	1755	31	19037	0.793366	0.882851	0.699825	Bend6;Heyl
GO:0001135	transcription factor activity, RNA polymerase II transcription factor recruiting	molecular_function	protein binding transcription factor activity	3	1755	9	19037	0.043019	0.217503	3.61576	Mybl1;Mybl2;RGD1560020_predicted
GO:0001158	enhancer sequence-specific DNA binding	molecular_function	binding	4	1755	30	19037	0.297609	0.660045	1.44631	Gata4;Hmgb2;Hmgb2l1;Sox11
GO:0001190	transcriptional activator activity, RNA polymerase II transcription factor binding	molecular_function	NA	1	1755	20	19037	0.855633	0.919372	0.542365	Gbx2
GO:0001191	transcriptional repressor activity, RNA polymerase II transcription factor binding	molecular_function	NA	2	1755	25	19037	0.684879	0.824954	0.867783	Bhlhe40;Eomes
GO:0001205	transcriptional activator activity, RNA polymerase II distal enhancer sequence-specific DNA binding	molecular_function	NA	2	1755	39	19037	0.886135	0.936841	0.556271	Spi1;Spib
GO:0001206	transcriptional repressor activity, RNA polymerase II distal enhancer sequence-specific binding	molecular_function	NA	1	1755	11	19037	0.654997	0.810409	0.986118	Msc
GO:0001222	transcription corepressor binding	molecular_function	binding	1	1755	15	19037	0.765745	0.867375	0.723153	Nek6
GO:0001223	transcription coactivator binding	molecular_function	binding	1	1755	19	19037	0.840956	0.910743	0.57091	Nr4a3
GO:0001227	transcriptional repressor activity, RNA polymerase II transcription regulatory region sequence-specific DNA binding	molecular_function	NA	7	1755	79	19037	0.600807	0.789613	0.961153	Bcl6b;E2f7;Eno1;Glis1;Ikzf1;Mxd3;Snai1
GO:0001228	transcriptional activator activity, RNA polymerase II transcription regulatory region sequence-specific DNA binding	molecular_function	NA	7	1755	152	19037	0.989164	1	0.499546	Creb3l4;E2f3;Gata4;Gbx2;Glis1;Pax9;Plagl1
GO:0001501	skeletal system development	biological_process	developmental process|multicellular organismal process	19	1755	101	19037	0.00202852	0.0270142	2.04058	Acan;Bmpr1b;Col1a1;Col1a2;Col3a1;Col5a2;Edn1;Fam20c;Fbn1;Foxc2;Fst;Gja5;Hapln3;Mmp9;Pthlh;Sh3pxd2b;Sox11;Tgfb2;Vcan
GO:0001502	cartilage condensation	biological_process	developmental process|multicellular organismal process	7	1755	21	19037	0.00203715	0.0270142	3.61576	Acan;Bmpr1b;Col11a1;Ctgf;Mycn;Sulf1;Tgfb2
GO:0001503	ossification	biological_process	multicellular organismal process	20	1755	93	19037	0.000262595	0.00605319	2.33275	Acan;Alox15;Col11a1;Col1a1;Col5a2;Ctgf;Ext1;Fgf18;Fn1;Foxc2;Fstl3;Hist1h2ao;Hist2h4;Hist2h4a;Mgp;Mmp8;Mmp9;Rsad2;Runx3;Sparc
GO:0001508	action potential	biological_process	biological regulation	2	1755	20	19037	0.562097	0.772752	1.08473	Chrna4;Glra1
GO:0001510	RNA methylation	biological_process	cellular process|metabolic process	1	1755	14	19037	0.741937	0.853711	0.774807	Nsun4
GO:0001515	opioid peptide activity	molecular_function	binding|receptor regulator activity	1	1755	5	19037	0.38347	0.688406	2.16946	Penk
GO:0001516	prostaglandin biosynthetic process	biological_process	cellular process|metabolic process	5	1755	17	19037	0.0159617	0.114947	3.19038	Cd74;Edn1;Pla2g4f;Ptgis;Ptgs2
GO:0001517	N-acetylglucosamine 6-O-sulfotransferase activity	molecular_function	catalytic activity	1	1755	6	19037	0.440322	0.704458	1.80788	Chst4
GO:0001518	voltage-gated sodium channel complex	cellular_component	cell|cell part|macromolecular complex|membrane|membrane part	2	1755	14	19037	0.37477	0.688406	1.54961	Scn3b;Scn5a
GO:0001523	retinoid metabolic process	biological_process	cellular process|metabolic process	1	1755	11	19037	0.654997	0.810409	0.986118	Adh7
GO:0001525	angiogenesis	biological_process	developmental process|multicellular organismal process	45	1755	194	19037	4.86783e-09	6.15718e-07	2.51612	Adam8;Adra2b;Angpt4;Angptl4;Anxa2;Apln;Aplnr;Apold1;Ccl12;Clic4;Col18a1;Ctgf;Cyp1b1;Eng;Epgn;Ephb2;Ereg;Esm1;Fgf18;Fgf9;Figf;Fn1;Gja5;Grem1;Hmox1;Hs6st1;Il18;Itgav;Mfge8;Mmp2;Ndnf;Nov;Plau;Prok2;Ptgs2;Ramp3;Scg2;Serpine1;Sox18;Srpx2;Syk;Thy1;Tmem100;Vegfc;Zc3h12a
GO:0001527	microfibril	cellular_component	extracellular matrix|extracellular matrix part|extracellular region|extracellular region part	4	1755	10	19037	0.00959641	0.0801	4.33892	Fbn1;Fbn2;Mfap4;Mfap5
GO:0001530	lipopolysaccharide binding	molecular_function	binding	6	1755	28	19037	0.0392095	0.209556	2.32442	Cd14;Lbp;Ptafr;Selp;Tlr2;Trem2
GO:0001533	cornified envelope	cellular_component	cell|cell part|membrane	4	1755	33	19037	0.362516	0.688406	1.31482	Anxa1;Cdsn;Cst6;Ivl
GO:0001537	N-acetylgalactosamine 4-O-sulfotransferase activity	molecular_function	catalytic activity	1	1755	5	19037	0.38347	0.688406	2.16946	Chst11
GO:0001540	amyloid-beta binding	molecular_function	binding	14	1755	54	19037	0.000287576	0.00656765	2.81226	Atp1a3;Cd74;Cryab;Ephb2;Gria3;Gsap;Itga2;Itgb2;Itm2a;Ldlr;Lilrb3a;Msr1;Pirb;Tgfb2
GO:0001541	ovarian follicle development	biological_process	developmental process|multicellular organismal process|reproduction|reproductive process|rhythmic process	6	1755	59	19037	0.464341	0.73204	1.10311	Icam1;Inhba;Mmp19;Mmp2;Pcyt1b;Vgf
GO:0001542	ovulation from ovarian follicle	biological_process	developmental process|multicellular organismal process|multi-organism process|reproduction|reproductive process|rhythmic process	5	1755	13	19037	0.00453078	0.0497781	4.17204	Adamts1;Mmp19;Mmp2;Nos2;Pgr
GO:0001547	antral ovarian follicle growth	biological_process	developmental process|growth|multicellular organismal process|reproduction|reproductive process|rhythmic process	1	1755	5	19037	0.38347	0.688406	2.16946	Ccne1
GO:0001552	ovarian follicle atresia	biological_process	developmental process|multicellular organismal process|reproduction|reproductive process	1	1755	5	19037	0.38347	0.688406	2.16946	Fas
GO:0001553	luteinization	biological_process	developmental process|multicellular organismal process|reproduction|reproductive process|rhythmic process	3	1755	15	19037	0.154716	0.444764	2.16946	Mmp2;Pgr;Ptprn
GO:0001554	luteolysis	biological_process	developmental process|multicellular organismal process|reproduction|reproductive process|rhythmic process	1	1755	5	19037	0.38347	0.688406	2.16946	Mmp19
GO:0001556	oocyte maturation	biological_process	cellular process|developmental process|multicellular organismal process|multi-organism process|reproduction|reproductive process	4	1755	19	19037	0.0912949	0.330931	2.28364	Ccnb1;Ereg;Fbxo5;Trip13
GO:0001558	regulation of cell growth	biological_process	biological regulation|cellular component organization or biogenesis|cellular process|growth|regulation of biological process	17	1755	69	19037	0.000132512	0.00359166	2.67252	Cd44;Ctgf;Cyr61;Esm1;H2afy2;Htra1;Igfbp2;Igfbp4;Kif14;Pttg1;Socs3;Tfrc;Tgfb1;Tgfb2;Wfdc1;Wisp1;Wisp2
GO:0001568	blood vessel development	biological_process	developmental process|multicellular organismal process	17	1755	72	19037	0.000230921	0.0054579	2.56117	Aldh1a2;Col1a1;Col1a2;Col3a1;Col5a1;Foxc2;Foxs1;Gja4;Gja5;Itgav;Lox;Loxl1;Pdgfrb;Sox18;Sphk1;Stra6;Tgfb2
GO:0001569	branching involved in blood vessel morphogenesis	biological_process	developmental process|multicellular organismal process	7	1755	36	19037	0.0434658	0.21857	2.1092	Col4a1;Cxcr4;Edn1;Ednra;Eng;Foxc2;Gbx2
GO:0001570	vasculogenesis	biological_process	cellular process|developmental process|multicellular organismal process	9	1755	70	19037	0.193484	0.505521	1.39465	Aplnr;Eng;Foxm1;Has2;Itgav;Sox18;Tgfb1;Tmem100;Wt1
GO:0001574	ganglioside biosynthetic process	biological_process	cellular process|metabolic process	2	1755	9	19037	0.198499	0.505521	2.41051	St6galnac1;St8sia2
GO:0001578	microtubule bundle formation	biological_process	cellular component organization or biogenesis|cellular process	6	1755	29	19037	0.0457202	0.228046	2.24427	Capn6;Fes;Kif20a;Map1b;Plk1;Prc1
GO:0001580	detection of chemical stimulus involved in sensory perception of bitter taste	biological_process	multicellular organismal process|response to stimulus	1	1755	48	19037	0.990424	1	0.225985	Rtp4
GO:0001591	dopamine neurotransmitter receptor activity, coupled via Gi/Go	molecular_function	molecular transducer activity|receptor activity	1	1755	11	19037	0.654997	0.810409	0.986118	Adra1d
GO:0001602	pancreatic polypeptide receptor activity	molecular_function	molecular transducer activity|receptor activity	3	1755	5	19037	0.00678245	0.0621893	6.50838	Npy4r;Prokr1;Prokr2
GO:0001609	G-protein coupled adenosine receptor activity	molecular_function	molecular transducer activity|receptor activity	2	1755	5	19037	0.070352	0.280328	4.33892	Adora1;Adora2a
GO:0001614	purinergic nucleotide receptor activity	molecular_function	molecular transducer activity|receptor activity	3	1755	8	19037	0.0307483	0.178239	4.06774	Niacr1;P2rx4;P2rx5
GO:0001618	virus receptor activity	molecular_function	NA	8	1755	21	19037	0.000348682	0.00699206	4.1323	Cd300ld;Cd300lf;Cd55;Clec5a;Dpp4;Gpr15;Havcr1;PVR
GO:0001631	cysteinyl leukotriene receptor activity	molecular_function	molecular transducer activity|receptor activity	3	1755	5	19037	0.00678245	0.0621893	6.50838	Cysltr2;Ltb4r;Ltb4r2
GO:0001649	osteoblast differentiation	biological_process	cellular process|developmental process|multicellular organismal process	15	1755	81	19037	0.00666372	0.0621893	2.00876	Bmp3;Col1a1;Cyr61;Fgf9;Fignl1;Gja1;Gpnmb;Igf1;Il18;Penk;Sfrp1;Snai1;Spp1;Tmem119;Tp53inp2
GO:0001650	fibrillar center	cellular_component	cell|cell part|membrane-enclosed lumen|organelle|organelle part	13	1755	133	19037	0.45533	0.723628	1.06026	Ankrd1;Dsn1;Fam111a;Fblim1;Heatr1;Nfkbie;Nuak1;Orc6;Rai14;Rsad2;Samd4a;Txnrd1;Ubd
GO:0001654	eye development	biological_process	developmental process|multicellular organismal process	4	1755	37	19037	0.448403	0.713308	1.17268	Bmpr1b;Fgf9;Sh3pxd2b;Tgfb2
GO:0001655	urogenital system development	biological_process	developmental process|multicellular organismal process	3	1755	16	19037	0.178116	0.475714	2.03387	Ephb2;Hells;Pax8
GO:0001656	metanephros development	biological_process	developmental process|multicellular organismal process	10	1755	41	19037	0.00338216	0.0406931	2.64568	Ctss;Fbn1;Foxc2;Gdnf;Itga8;Pax8;Robo2;Slit2;Spry1;Wt1
GO:0001657	ureteric bud development	biological_process	developmental process|multicellular organismal process	14	1755	48	19037	7.23474e-05	0.00233261	3.16379	Bdnf;Bmper;Crlf1;Foxc2;Gdnf;Gsta3;Ret;Robo2;Sfrp1;Slit2;Spry1;Tgfb1;Vcan;Wt1
GO:0001658	branching involved in ureteric bud morphogenesis	biological_process	developmental process|multicellular organismal process	8	1755	49	19037	0.0777271	0.295627	1.77099	Adamts16;Cd44;Gdnf;Grem1;Pax8;Timeless;Wnt9b;Wt1
GO:0001659	temperature homeostasis	biological_process	biological regulation|multicellular organismal process	5	1755	24	19037	0.0641951	0.280328	2.25985	Adora1;Drd1;Gpx2;Htr2a;Trpm2
GO:0001660	fever generation	biological_process	biological regulation|multicellular organismal process|response to stimulus	2	1755	7	19037	0.130648	0.394341	3.09923	Il1a;Il1b
GO:0001661	conditioned taste aversion	biological_process	multicellular organismal process	1	1755	7	19037	0.491934	0.73204	1.54961	Drd1
GO:0001662	behavioral fear response	biological_process	multicellular organismal process|response to stimulus	5	1755	40	19037	0.307144	0.662502	1.35591	Bdnf;Dbi;Dpp4;Drd1;Penk
GO:0001664	G-protein coupled receptor binding	molecular_function	binding	8	1755	73	19037	0.358882	0.688406	1.18874	Adora1;Apln;Ccl2;Fcnb;LOC290595;Prok2;Ramp3;Rspo1
GO:0001665	alpha-N-acetylgalactosaminide alpha-2,6-sialyltransferase activity	molecular_function	catalytic activity	1	1755	5	19037	0.38347	0.688406	2.16946	St6galnac1
GO:0001666	response to hypoxia	biological_process	response to stimulus	56	1755	268	19037	4.1744e-09	5.41902e-07	2.2666	Abcb1b;Adora1;Angptl4;Apold1;Arnt2;Atp1b1;Bdnf;Ccl2;Cd38;Chrna4;Cryab;Cxcr4;Cygb;Dio3;Dpp4;Edn1;Ednra;Egr1;Eng;Fas;Figf;Hmox1;Hspg2;Icam1;Igf1;Il18;Il1a;Il1b;Itga2;Ldha;Ldlr;Loxl2;Mmp2;Mmp9;Muc1;Nos2;Nox4;Pak1;Penk;Plat;Plau;Plod2;Postn;Ptgis;Reg1a;RGD1560020_predicted;Socs3;Tacc3;Tfrc;Tgfb1;Tgfb2;Tgfb3;Tlr2;Trh;Ucp2;Vegfc
GO:0001667	ameboidal-type cell migration	biological_process	cellular process|localization|locomotion	1	1755	8	19037	0.53879	0.748901	1.35591	Cxcr4
GO:0001669	acrosomal vesicle	cellular_component	cell|cell part|organelle	8	1755	119	19037	0.868004	0.925897	0.72923	Atp6v1e2;C4bpa;Calr;Cxadr;Itgb1;Loxl1;Ncf2;Skil
GO:0001671	ATPase activator activity	molecular_function	enzyme regulator activity	1	1755	24	19037	0.901994	0.94671	0.451971	Atp1b1
GO:0001673	male germ cell nucleus	cellular_component	cell|cell part|organelle	4	1755	21	19037	0.122083	0.393104	2.06615	H2afx;Ran;Tcfl5;Trip13
GO:0001678	cellular glucose homeostasis	biological_process	biological regulation|cellular process	1	1755	18	19037	0.824788	0.899354	0.602627	Hk3
GO:0001682	tRNA 5'-leader removal	biological_process	cellular process|metabolic process	1	1755	10	19037	0.619941	0.789613	1.08473	Rpp25
GO:0001701	in utero embryonic development	biological_process	developmental process|multicellular organismal process	28	1755	275	19037	0.318124	0.685287	1.10445	Arnt2;Ccnb1;Ccnb2;Dsc3;Edn1;Ednra;Eno1;Gata4;Gja1;Itgb1;Maff;Muc1;Myh10;Ooep;Pdgfrb;Plod3;Prdm1;Rcn1;RGD1560020_predicted;Sec24d;Slc39a1;Slit2;Sox18;Stil;Tead4;Tgfb3;Tmem100;Wnt9b
GO:0001702	gastrulation with mouth forming second	biological_process	developmental process|multicellular organismal process	2	1755	27	19037	0.725443	0.846608	0.803503	Gata4;Ugdh
GO:0001706	endoderm formation	biological_process	developmental process|multicellular organismal process	4	1755	14	19037	0.0339698	0.188708	3.09923	Dusp2;Dusp4;Eomes;Gata4
GO:0001707	mesoderm formation	biological_process	developmental process|multicellular organismal process	6	1755	36	19037	0.109112	0.359791	1.80788	Crb2;Eomes;Inhba;Nr4a3;Snai1;Txnrd1
GO:0001708	cell fate specification	biological_process	cellular process|developmental process	2	1755	23	19037	0.639521	0.808083	0.943243	Itgb1;Tead4
GO:0001714	endodermal cell fate specification	biological_process	cellular process|developmental process|multicellular organismal process	1	1755	5	19037	0.38347	0.688406	2.16946	Eomes
GO:0001725	stress fiber	cellular_component	cell|cell part|organelle|organelle part	19	1755	75	19037	3.60143e-05	0.00131979	2.74798	Acta1;Actn1;Cnn2;Enah;Fblim1;Fhl3;Fscn1;Lcp1;Lima1;Micall2;Myh10;Myl12a;Nox4;Sept11;Sept5;Sh2b2;Tpm3;Tpm4;Xirp2
GO:0001726	ruffle	cellular_component	cell|cell part	16	1755	88	19037	0.00621599	0.0621893	1.97224	Actn1;Aif1;Anxa2;Cit;Fgd2;Fscn1;Kif18a;Klhl41;Lcp1;Mefv;Myo10;Nme2;Pak1;S100a11;Sh2b2;Tnfrsf12a
GO:0001730	2'-5'-oligoadenylate synthetase activity	molecular_function	catalytic activity	7	1755	10	19037	5.22632e-06	0.000265788	7.59311	Oas1a;Oas1b;Oas1i;Oas2;Oas3;Oasl;Oasl2
GO:0001736	establishment of planar polarity	biological_process	developmental process	1	1755	15	19037	0.765745	0.867375	0.723153	Ptk7
GO:0001740	Barr body	cellular_component	cell|cell part|membrane-enclosed lumen|organelle|organelle part	1	1755	5	19037	0.38347	0.688406	2.16946	H2afy2
GO:0001741	XY body	cellular_component	cell|cell part|organelle	4	1755	20	19037	0.106182	0.351304	2.16946	Esco2;H2afx;Plk4;Rad18
GO:0001750	photoreceptor outer segment	cellular_component	cell|cell part|organelle|organelle part	5	1755	70	19037	0.784981	0.877748	0.774807	Map1b;Myo7a;Opn3;Pdc;Prom1
GO:0001755	neural crest cell migration	biological_process	cellular process|developmental process|localization|locomotion|multicellular organismal process	6	1755	44	19037	0.216002	0.535178	1.47918	Cfl1;Ednrb;Gbx2;Gdnf;Ret;Sema3d
GO:0001756	somitogenesis	biological_process	developmental process|multicellular organismal process	4	1755	56	19037	0.771123	0.872666	0.774807	Crb2;Foxc2;Ifitm1;Sfrp1
GO:0001758	retinal dehydrogenase activity	molecular_function	catalytic activity	3	1755	9	19037	0.043019	0.217503	3.61576	Aldh1a2;Aldh1a3;Aldh1a7
GO:0001759	organ induction	biological_process	biological regulation|developmental process|multicellular organismal process|positive regulation of biological process|regulation of biological process	2	1755	15	19037	0.408624	0.704458	1.44631	Gdnf;Spry1
GO:0001763	morphogenesis of a branching structure	biological_process	developmental process|multicellular organismal process	2	1755	11	19037	0.269385	0.609577	1.97224	Prdm1;Tgfb1
GO:0001764	neuron migration	biological_process	cellular process|developmental process|localization|locomotion|multicellular organismal process	12	1755	126	19037	0.497543	0.739272	1.03308	Aspm;Axl;Ccr4;Cxcr4;Gja1;Mdga1;Met;Myh10;Ndn;Ndnf;Tnn;Tubb2b
GO:0001765	membrane raft assembly	biological_process	cellular component organization or biogenesis|cellular process	1	1755	6	19037	0.440322	0.704458	1.80788	Anxa2
GO:0001766	membrane raft polarization	biological_process	cellular component organization or biogenesis|cellular process|localization	2	1755	7	19037	0.130648	0.394341	3.09923	Dock2;Mall
GO:0001768	establishment of T cell polarity	biological_process	cellular process|immune system process	1	1755	5	19037	0.38347	0.688406	2.16946	Dock2
GO:0001771	immunological synapse formation	biological_process	cellular process|immune system process	3	1755	11	19037	0.0735992	0.284534	2.95835	Coro1a;Dock2;Msn
GO:0001772	immunological synapse	cellular_component	cell|cell part|membrane|membrane part	9	1755	34	19037	0.00294593	0.0372789	2.87134	Card11;Cd37;Cd3e;Cd53;Coro1a;Icam1;Itgal;Lck;Scimp
GO:0001774	microglial cell activation	biological_process	cellular process|immune system process	7	1755	19	19037	0.00104047	0.0165037	3.99637	Cx3cr1;Itgam;Tlr1;Tlr2;Tlr7;Tlr8;Tlr9
GO:0001775	cell activation	biological_process	cellular process	6	1755	16	19037	0.00216229	0.027923	4.06774	Fn1;Igf1;Tgfb1;Timp1;Tlr1;Tlr2
GO:0001776	leukocyte homeostasis	biological_process	biological regulation|immune system process	3	1755	8	19037	0.0307483	0.178239	4.06774	Bak1;Cxcl6;Nkx2-3
GO:0001778	plasma membrane repair	biological_process	cellular component organization or biogenesis|cellular process|response to stimulus	3	1755	9	19037	0.043019	0.217503	3.61576	Cav3;Myh10;Myh2
GO:0001779	natural killer cell differentiation	biological_process	cellular process|developmental process|immune system process|multicellular organismal process	3	1755	17	19037	0.202394	0.507839	1.91423	Axl;Ikzf1;Slamf6
GO:0001780	neutrophil homeostasis	biological_process	biological regulation|immune system process	1	1755	7	19037	0.491934	0.73204	1.54961	Anxa1
GO:0001782	B cell homeostasis	biological_process	biological regulation|immune system process	4	1755	27	19037	0.234406	0.556728	1.60701	Bak1;Gapt;Lyn;Nckap1l
GO:0001783	B cell apoptotic process	biological_process	cellular process	1	1755	8	19037	0.53879	0.748901	1.35591	Bak1
GO:0001784	phosphotyrosine residue binding	molecular_function	binding	9	1755	37	19037	0.00543439	0.0584049	2.63853	Fgr;Hck;Lck;Ptpn6;Samsn1;Socs3;Stap1;Syk;Vav1
GO:0001786	phosphatidylserine binding	molecular_function	binding	10	1755	47	19037	0.00941813	0.0801	2.30793	Axl;Cd300a;Cd300lf;Gap43;Gsdmc;Gsdmd;Havcr1;Mfge8;Syt10;Thbs1
GO:0001816	cytokine production	biological_process	multicellular organismal process	5	1755	29	19037	0.123307	0.394341	1.87022	Cxcl6;Fabp4;G6pd;Ptafr;Tlr9
GO:0001817	regulation of cytokine production	biological_process	biological regulation|multicellular organismal process|regulation of biological process	8	1755	47	19037	0.0636166	0.280328	1.84635	Btn2a2;Btnl9;Ermap;Litaf;Lyn;Mog;Nlrp3;Vtcn1
GO:0001818	negative regulation of cytokine production	biological_process	biological regulation|multicellular organismal process|negative regulation of biological process|regulation of biological process	5	1755	13	19037	0.00453078	0.0497781	4.17204	Axl;Btk;Gpnmb;Il10;Slc11a1
GO:0001819	positive regulation of cytokine production	biological_process	biological regulation|multicellular organismal process|positive regulation of biological process|regulation of biological process	7	1755	33	19037	0.0282701	0.171322	2.30094	Card11;Ccdc88b;Ereg;Il36b;Lgals9;Nfam1;Slc11a1
GO:0001821	histamine secretion	biological_process	establishment of localization|localization	2	1755	6	19037	0.0992091	0.333151	3.61576	Edn1;Ednra
GO:0001822	kidney development	biological_process	developmental process|multicellular organismal process	27	1755	150	19037	0.000547176	0.0105438	1.95251	Adamts1;Aldh1a2;Aldh1a3;Car2;Cenpf;Ckmt1b;Fbn1;Fmn1;Foxc2;Fstl3;Has2;Itga8;Mmp17;Mmp9;Pax8;Pcsk5;Pcsk9;Pdgfrb;Ren;Sox11;Stra6;Sulf1;Tgfb2;Timeless;Tp73;Wnt9b;Wt1
GO:0001823	mesonephros development	biological_process	developmental process|multicellular organismal process	3	1755	14	19037	0.13238	0.394341	2.32442	Pax8;Ren;Wt1
GO:0001824	blastocyst development	biological_process	developmental process|multicellular organismal process	4	1755	30	19037	0.297609	0.660045	1.44631	Atp1b1;Eomes;Nek2;Spic
GO:0001825	blastocyst formation	biological_process	developmental process|multicellular organismal process	2	1755	14	19037	0.37477	0.688406	1.54961	Skil;Tead4
GO:0001829	trophectodermal cell differentiation	biological_process	cellular process|developmental process|multicellular organismal process	1	1755	21	19037	0.868956	0.925897	0.516538	Eomes
GO:0001833	inner cell mass cell proliferation	biological_process	developmental process|growth|multicellular organismal process	4	1755	16	19037	0.0533197	0.254377	2.71182	Chek1;Gins1;Gins4;Ncapg2
GO:0001836	release of cytochrome c from mitochondria	biological_process	biological regulation|cellular component organization or biogenesis|cellular process|regulation of biological process|response to stimulus|signaling	4	1755	23	19037	0.156633	0.447406	1.88649	Bak1;Bcl2a1;Pmaip1;Tp73
GO:0001837	epithelial to mesenchymal transition	biological_process	cellular process|developmental process|multicellular organismal process	6	1755	37	19037	0.120648	0.390266	1.75902	Fam83d;Hmga2;Loxl2;Snai1;Tgfb1;Tgfb2
GO:0001841	neural tube formation	biological_process	developmental process|multicellular organismal process	1	1755	17	19037	0.806977	0.889729	0.638076	Sox11
GO:0001842	neural fold formation	biological_process	developmental process|multicellular organismal process	1	1755	5	19037	0.38347	0.688406	2.16946	Cfl1
GO:0001843	neural tube closure	biological_process	developmental process|multicellular organismal process	8	1755	97	19037	0.681091	0.824954	0.894622	Enah;Kif20b;Prickle1;Ptk7;Sfrp1;Stil;Tgfb1;Tgfb2
GO:0001848	complement binding	molecular_function	binding	1	1755	8	19037	0.53879	0.748901	1.35591	C4bpa
GO:0001849	complement component C1q binding	molecular_function	binding	1	1755	8	19037	0.53879	0.748901	1.35591	Ptx3
GO:0001867	complement activation, lectin pathway	biological_process	biological regulation|immune system process|metabolic process|positive regulation of biological process|regulation of biological process|response to stimulus	2	1755	11	19037	0.269385	0.609577	1.97224	Fcnb;Masp1
GO:0001878	response to yeast	biological_process	multi-organism process|response to stimulus	3	1755	8	19037	0.0307483	0.178239	4.06774	Il6;Ncf1;Ptx3
GO:0001881	receptor recycling	biological_process	biological regulation|cellular process|metabolic process|regulation of biological process	1	1755	12	19037	0.686821	0.824954	0.903941	Ehd3
GO:0001886	endothelial cell morphogenesis	biological_process	cellular component organization or biogenesis|cellular process|developmental process	4	1755	13	19037	0.0261266	0.162116	3.33763	Clic4;Col18a1;Met;Plod3
GO:0001889	liver development	biological_process	developmental process|multicellular organismal process	12	1755	147	19037	0.71272	0.839021	0.885493	Aldh1a2;Arg1;Ccne1;Cdkn2b;Foxm1;Fscn1;Hmgcs1;Lbp;Met;Pcsk9;Tk1;Vwf
GO:0001890	placenta development	biological_process	developmental process|multicellular organismal process|reproduction|reproductive process	10	1755	55	19037	0.0272576	0.168498	1.97224	Abcb1b;Ccnf;E2f7;E2f8;Htra1;Met;Peg10;Serpine1;Txnrd1;Vwf
GO:0001891	phagocytic cup	cellular_component	cell|cell part|membrane|membrane part	7	1755	24	19037	0.00474368	0.0516569	3.16379	Aif1;Anxa1;Arhgap25;Bin2;Coro1a;Lcp1;Myo1g
GO:0001892	embryonic placenta development	biological_process	developmental process|multicellular organismal process|reproduction|reproductive process	1	1755	28	19037	0.933473	0.969012	0.387403	Prdm1
GO:0001893	maternal placenta development	biological_process	developmental process|multicellular organismal process|multi-organism process|reproduction|reproductive process	1	1755	12	19037	0.686821	0.824954	0.903941	Prdm1
GO:0001894	tissue homeostasis	biological_process	biological regulation|multicellular organismal process	4	1755	20	19037	0.106182	0.351304	2.16946	Ctgf;Itgb1;Pdgfrb;Tp53inp2
GO:0001913	T cell mediated cytotoxicity	biological_process	cell killing|immune system process|response to stimulus	5	1755	12	19037	0.00301526	0.0372789	4.51971	LOC102547056;Raet1c;Raet1d;Raet1e;Serpinb9
GO:0001916	positive regulation of T cell mediated cytotoxicity	biological_process	biological regulation|cell killing|immune system process|positive regulation of biological process|regulation of biological process|response to stimulus	1	1755	18	19037	0.824788	0.899354	0.602627	Ptprc
GO:0001917	photoreceptor inner segment	cellular_component	cell|cell part	2	1755	46	19037	0.933929	0.969094	0.471621	Myo7a;Pdc
GO:0001919	regulation of receptor recycling	biological_process	biological regulation|cellular process|metabolic process|regulation of biological process|signaling	1	1755	9	19037	0.581326	0.772752	1.20525	Gria3
GO:0001921	positive regulation of receptor recycling	biological_process	biological regulation|cellular process|metabolic process|positive regulation of biological process|regulation of biological process|signaling	2	1755	17	19037	0.473442	0.73204	1.27615	Anxa2;Ramp3
GO:0001931	uropod	cellular_component	cell|cell part	4	1755	11	19037	0.0139929	0.10432	3.94447	Bst1;Msn;Selplg;Spn
GO:0001932	regulation of protein phosphorylation	biological_process	biological regulation|cellular process|metabolic process|regulation of biological process	11	1755	63	19037	0.0279222	0.170942	1.89397	Ccnyl1;Drd1;Fn1;Igf1;Pik3cg;Rad51;Socs3;Tlr7;Tlr8;Tlr9;Wnt9b
GO:0001933	negative regulation of protein phosphorylation	biological_process	biological regulation|cellular process|metabolic process|negative regulation of biological process|regulation of biological process	10	1755	85	19037	0.255817	0.596947	1.27615	Bdkrb1;Ccnb1;Cd109;Ephb2;Kirrel;Lyn;Pbk;Slit2;Tgfb1;Zc3h12a
GO:0001934	positive regulation of protein phosphorylation	biological_process	biological regulation|cellular process|metabolic process|positive regulation of biological process|regulation of biological process	34	1755	199	19037	0.000315118	0.00697075	1.85331	Aif1;Anxa2;C3;Camp;Card14;Cd40;Cd74;Csf1r;Ctgf;Cxcr4;Cyr61;Drd1;Ednra;Ednrb;Eng;Erp29;Fas;Fndc1;Gata4;Gpnmb;Il1b;Iqgap3;Lyn;Map2k3;Mmp9;Ngf;Pak1;Plaur;Reg3b;Rspo1;RT1-Db1;Sphk1;Spn;Tgfb1
GO:0001935	endothelial cell proliferation	biological_process	NA	3	1755	17	19037	0.202394	0.507839	1.91423	Angpt4;Loxl2;Nos2
GO:0001936	regulation of endothelial cell proliferation	biological_process	biological regulation|cellular process|regulation of biological process	2	1755	6	19037	0.0992091	0.333151	3.61576	Aldh1a2;Fgf18
GO:0001937	negative regulation of endothelial cell proliferation	biological_process	biological regulation|cellular process|negative regulation of biological process|regulation of biological process	6	1755	33	19037	0.0781392	0.296736	1.97224	Eng;Gja1;Rgcc;Sparc;Sulf1;Thbs1
GO:0001938	positive regulation of endothelial cell proliferation	biological_process	biological regulation|cellular process|positive regulation of biological process|regulation of biological process	14	1755	72	19037	0.00552731	0.0592744	2.1092	Arg1;Ccl2;Ccr3;Egr3;F3;Figf;Hmgb2;Hspg2;Il10;Nr4a1;Scg2;Thbs4;Vash2;Vegfc
GO:0001939	female pronucleus	cellular_component	cell|cell part|organelle	2	1755	9	19037	0.198499	0.505521	2.41051	Ccna2;Slc2a1
GO:0001940	male pronucleus	cellular_component	cell|cell part|organelle	1	1755	7	19037	0.491934	0.73204	1.54961	Ccna2
GO:0001942	hair follicle development	biological_process	developmental process|multicellular organismal process	6	1755	48	19037	0.279208	0.626061	1.35591	Cd109;Dbi;Inhba;Sox18;Sox21;Tgfb2
GO:0001944	vasculature development	biological_process	developmental process|multicellular organismal process	2	1755	27	19037	0.725443	0.846608	0.803503	Sox18;Spi1
GO:0001945	lymph vessel development	biological_process	developmental process|multicellular organismal process	4	1755	13	19037	0.0261266	0.162116	3.33763	Ccbe1;Foxc2;Sox18;Syk
GO:0001946	lymphangiogenesis	biological_process	developmental process|multicellular organismal process	3	1755	14	19037	0.13238	0.394341	2.32442	Ccbe1;Foxc2;Sox18
GO:0001947	heart looping	biological_process	developmental process|multicellular organismal process	5	1755	56	19037	0.597417	0.787117	0.968508	Eng;Gata4;Gja1;Stil;Zic3
GO:0001952	regulation of cell-matrix adhesion	biological_process	biological adhesion|biological regulation|regulation of biological process	2	1755	12	19037	0.304935	0.660045	1.80788	Bst1;Thy1
GO:0001953	negative regulation of cell-matrix adhesion	biological_process	biological adhesion|biological regulation|cellular process|negative regulation of biological process|regulation of biological process	3	1755	19	19037	0.252891	0.592923	1.71273	Muc4;Postn;Thbs1
GO:0001954	positive regulation of cell-matrix adhesion	biological_process	biological adhesion|biological regulation|positive regulation of biological process|regulation of biological process	1	1755	27	19037	0.926707	0.964236	0.401752	Vegfc
GO:0001955	blood vessel maturation	biological_process	developmental process|multicellular organismal process	2	1755	8	19037	0.163948	0.448809	2.71182	Cd44;Mmp2
GO:0001956	positive regulation of neurotransmitter secretion	biological_process	biological regulation|cellular process|establishment of localization|localization|positive regulation of biological process|regulation of biological process|signaling	1	1755	8	19037	0.53879	0.748901	1.35591	Sphk1
GO:0001957	intramembranous ossification	biological_process	multicellular organismal process	4	1755	6	19037	0.000927189	0.0154001	7.23153	Col1a1;Ctsk;Fgf18;Mmp2
GO:0001958	endochondral ossification	biological_process	developmental process|multicellular organismal process	5	1755	30	19037	0.137396	0.406826	1.80788	Col1a1;Csgalnact1;Fgf18;Hspg2;Pthlh
GO:0001960	negative regulation of cytokine-mediated signaling pathway	biological_process	biological regulation|cellular process|negative regulation of biological process|regulation of biological process|response to stimulus|signaling	1	1755	7	19037	0.491934	0.73204	1.54961	Ptprc
GO:0001961	positive regulation of cytokine-mediated signaling pathway	biological_process	biological regulation|cellular process|positive regulation of biological process|regulation of biological process|response to stimulus|signaling	2	1755	8	19037	0.163948	0.448809	2.71182	Axl;Cd74
GO:0001963	synaptic transmission, dopaminergic	biological_process	cellular process|signaling	3	1755	22	19037	0.331103	0.688406	1.47918	Adora2a;Adra1d;Drd1
GO:0001964	startle response	biological_process	multicellular organismal process|response to stimulus	4	1755	22	19037	0.138926	0.40793	1.97224	Drd1;Glra1;Nrg1;Penk
GO:0001965	G-protein alpha-subunit binding	molecular_function	binding	8	1755	34	19037	0.0105673	0.0871713	2.5523	Drd1;F2r;F2rl1;Htr2a;Rgs14;Rgs19;Rgs4;Rgs8
GO:0001968	fibronectin binding	molecular_function	binding	14	1755	32	19037	2.90304e-07	2.13741e-05	4.74569	Ccdc80;Ctgf;Ctsk;Ctss;Fstl3;Itga4;Itgav;Itgb1;Lrrc15;Mmp2;Mmp9;Ssc5d;Thbs1;Thbs4
GO:0001972	retinoic acid binding	molecular_function	binding	2	1755	19	19037	0.533766	0.748901	1.14182	Lrat;Ugt2b7
GO:0001973	adenosine receptor signaling pathway	biological_process	biological regulation|cellular process|regulation of biological process|response to stimulus|signaling	2	1755	8	19037	0.163948	0.448809	2.71182	Adora1;Adora2a
GO:0001974	blood vessel remodeling	biological_process	multicellular organismal process	10	1755	43	19037	0.00488452	0.052725	2.52263	Axl;Bak1;Bgn;Eln;Foxc2;Igf1;Itga4;Lif;Nos2;Tgfb2
GO:0001975	response to amphetamine	biological_process	response to stimulus	8	1755	45	19037	0.0512198	0.249671	1.92841	Adora2a;Cnr2;Cxcl1;Cxcl2;Drd1;Egr1;Icam1;Rasgrf1
GO:0002009	morphogenesis of an epithelium	biological_process	developmental process	4	1755	23	19037	0.156633	0.447406	1.88649	Car2;Kb15;Krt17;Timeless
GO:0002020	protease binding	molecular_function	binding	26	1755	128	19037	9.35886e-05	0.00281508	2.20336	Adamts4;Anxa2;Casp12;Ccbe1;Col1a1;Col1a2;Col3a1;Cst6;Dpp4;F3;Fap;Fas;Fn1;Hspg2;Il1r1;Itgav;Itgb1;Lcn2;Ldlr;Sell;Serpinb3a;Serpinb9;Serpine1;Timp1;Tnfrsf10b;Vwf
GO:0002021	response to dietary excess	biological_process	multicellular organismal process|response to stimulus	1	1755	14	19037	0.741937	0.853711	0.774807	Vgf
GO:0002026	regulation of the force of heart contraction	biological_process	biological regulation|multicellular organismal process|regulation of biological process	2	1755	23	19037	0.639521	0.808083	0.943243	Apln;Myl4
GO:0002027	regulation of heart rate	biological_process	biological regulation|multicellular organismal process|regulation of biological process	2	1755	36	19037	0.857089	0.919535	0.602627	Cav3;Scn5a
GO:0002028	regulation of sodium ion transport	biological_process	biological regulation|establishment of localization|localization|regulation of biological process	4	1755	24	19037	0.17512	0.473872	1.80788	Nkain1;Nkain4;P2rx4;Tgfb1
GO:0002039	p53 binding	molecular_function	binding	6	1755	77	19037	0.724831	0.846608	0.845244	Ankrd1;Muc1;Nuak1;Plk3;Tp73;Zmat4
GO:0002040	sprouting angiogenesis	biological_process	developmental process|multicellular organismal process	7	1755	29	19037	0.0142521	0.105406	2.61831	E2f7;E2f8;Eng;Esm1;Loxl2;Loxl4;Thbs1
GO:0002042	cell migration involved in sprouting angiogenesis	biological_process	cellular process|developmental process|localization|locomotion|multicellular organismal process	5	1755	17	19037	0.0159617	0.114947	3.19038	Egr3;Grem1;Itgb1;Nr4a1;Slit2
GO:0002043	blood vessel endothelial cell proliferation involved in sprouting angiogenesis	biological_process	developmental process|multicellular organismal process	1	1755	7	19037	0.491934	0.73204	1.54961	Bmper
GO:0002051	osteoblast fate commitment	biological_process	cellular process|developmental process|multicellular organismal process	1	1755	5	19037	0.38347	0.688406	2.16946	Sh3pxd2b
GO:0002052	positive regulation of neuroblast proliferation	biological_process	biological regulation|cellular process|developmental process|multicellular organismal process|positive regulation of biological process|regulation of biological process	3	1755	24	19037	0.383295	0.688406	1.35591	Aspm;Cx3cr1;Vegfc
GO:0002053	positive regulation of mesenchymal cell proliferation	biological_process	biological regulation|cellular process|positive regulation of biological process|regulation of biological process	2	1755	36	19037	0.857089	0.919535	0.602627	Fgf9;Mycn
GO:0002062	chondrocyte differentiation	biological_process	cellular process|developmental process|multicellular organismal process	8	1755	46	19037	0.0572057	0.263118	1.88649	Bmpr1b;Fgf9;Gdf5;Hmga2;Hspg2;Nov;Runx3;Tgfb1
GO:0002063	chondrocyte development	biological_process	cellular process|developmental process|multicellular organismal process	6	1755	17	19037	0.0030834	0.0376495	3.82846	Acan;Chst11;Chsy1;Col11a1;Fgf18;Sulf1
GO:0002064	epithelial cell development	biological_process	cellular process|developmental process	2	1755	13	19037	0.340143	0.688406	1.66881	Cxcr4;Slc4a5
GO:0002070	epithelial cell maturation	biological_process	cellular process|developmental process	2	1755	8	19037	0.163948	0.448809	2.71182	Gja1;Pgr
GO:0002076	osteoblast development	biological_process	cellular process|developmental process|multicellular organismal process	3	1755	22	19037	0.331103	0.688406	1.47918	Clec5a;Pthlh;Tnn
GO:0002080	acrosomal membrane	cellular_component	cell|cell part|membrane|organelle|organelle part	1	1755	22	19037	0.88105	0.932065	0.493059	Tekt3
GO:0002081	outer acrosomal membrane	cellular_component	cell|cell part|membrane|membrane part|organelle|organelle part	1	1755	5	19037	0.38347	0.688406	2.16946	C4bpa
GO:0002087	regulation of respiratory gaseous exchange by neurological system process	biological_process	biological regulation|multicellular organismal process|regulation of biological process	2	1755	13	19037	0.340143	0.688406	1.66881	Adora1;Glra1
GO:0002088	lens development in camera-type eye	biological_process	developmental process|multicellular organismal process	3	1755	39	19037	0.710371	0.839021	0.834407	Cryab;Gja1;Nhs
GO:0002089	lens morphogenesis in camera-type eye	biological_process	developmental process|multicellular organismal process	1	1755	14	19037	0.741937	0.853711	0.774807	Sox11
GO:0002090	regulation of receptor internalization	biological_process	biological regulation|cellular component organization or biogenesis|cellular process|establishment of localization|localization|metabolic process|regulation of biological process	1	1755	7	19037	0.491934	0.73204	1.54961	Rspo1
GO:0002092	positive regulation of receptor internalization	biological_process	biological regulation|cellular component organization or biogenesis|cellular process|establishment of localization|localization|metabolic process|positive regulation of biological process|regulation of biological process	4	1755	29	19037	0.276247	0.62225	1.49618	Grem1;Pcsk9;Sfrp4;Syk
GO:0002102	podosome	cellular_component	cell|cell part|macromolecular complex|organelle|organelle part	9	1755	31	19037	0.00145724	0.0217008	3.14921	Adam8;Bin2;Fermt3;Fscn1;Lcp1;Ncf1;Sh3pxd2b;Tpm3;Tpm4
GO:0002115	store-operated calcium entry	biological_process	establishment of localization|localization	1	1755	9	19037	0.581326	0.772752	1.20525	Cracr2a
GO:0002116	semaphorin receptor complex	cellular_component	macromolecular complex	1	1755	9	19037	0.581326	0.772752	1.20525	Plxnc1
GO:0002118	aggressive behavior	biological_process	multi-organism process	1	1755	5	19037	0.38347	0.688406	2.16946	Penk
GO:0002138	retinoic acid biosynthetic process	biological_process	biological regulation|cellular process|metabolic process	3	1755	7	19037	0.0206121	0.134142	4.64884	Aldh1a2;Aldh1a3;Rbp1
GO:0002177	manchette	cellular_component	cell|cell part|organelle|organelle part	1	1755	11	19037	0.654997	0.810409	0.986118	Ran
GO:0002199	zona pellucida receptor complex	cellular_component	macromolecular complex	1	1755	13	19037	0.715711	0.839021	0.834407	C4bpa
GO:0002218	activation of innate immune response	biological_process	biological regulation|immune system process|positive regulation of biological process|regulation of biological process|response to stimulus	4	1755	22	19037	0.138926	0.40793	1.97224	Aim2;Mb21d1;Nlrc4;Tlr9
GO:0002221	pattern recognition receptor signaling pathway	biological_process	biological regulation|cellular process|immune system process|positive regulation of biological process|regulation of biological process|response to stimulus|signaling	1	1755	9	19037	0.581326	0.772752	1.20525	Clec7a
GO:0002224	toll-like receptor signaling pathway	biological_process	biological regulation|cellular process|immune system process|positive regulation of biological process|regulation of biological process|response to stimulus|signaling	8	1755	20	19037	0.000234741	0.00546573	4.33892	Cd180;Tlr1;Tlr10;Tlr2;Tlr7;Tlr8;Tlr9;Unc93b1
GO:0002227	innate immune response in mucosa	biological_process	immune system process|response to stimulus	5	1755	23	19037	0.054819	0.260021	2.35811	Camp;Defb1;Hist1h2bd;Hist1h2bh;Hist1h2bk
GO:0002230	positive regulation of defense response to virus by host	biological_process	biological regulation|immune system process|multi-organism process|regulation of biological process|response to stimulus	5	1755	27	19037	0.0973013	0.333151	2.00876	Aim2;Mb21d1;Ptpn22;Treml4;Zc3h12a
GO:0002237	response to molecule of bacterial origin	biological_process	multi-organism process|response to stimulus	4	1755	11	19037	0.0139929	0.10432	3.94447	Cd14;Cxcl2;Il10;Tlr9
GO:0002244	hematopoietic progenitor cell differentiation	biological_process	cellular process|developmental process|immune system process|multicellular organismal process	21	1755	87	19037	3.13908e-05	0.00116429	2.61831	Anln;Apobec3b;Arl11;Cebpd;Esco2;Fst;Fstl3;Inhba;Kcnab2;Kcp;Muc4;Pld4;Plek;Ptpn6;Ptprc;Ptprq;RGD1563091;Sfrp1;Sirpa;Tgfb1;Top2a
GO:0002250	adaptive immune response	biological_process	immune system process|response to stimulus	16	1755	79	19037	0.00203272	0.0270142	2.19692	Adgre1;Anxa1;Arg1;Cd8b;Clec4a;Clec4d;Ctss;Gpr183;Jak3;Klrk1;Lat2;Lax1;Lilrb3a;Lyn;Syk;Vtcn1
GO:0002260	lymphocyte homeostasis	biological_process	biological regulation|immune system process	1	1755	12	19037	0.686821	0.824954	0.903941	Skil
GO:0002262	myeloid cell homeostasis	biological_process	biological regulation|immune system process	3	1755	11	19037	0.0735992	0.284534	2.95835	Bak1;Il6;Nckap1l
GO:0002281	macrophage activation involved in immune response	biological_process	cellular process|immune system process|response to stimulus	3	1755	10	19037	0.0573429	0.263118	3.25419	Lbp;Syk;Tyrobp
GO:0002283	neutrophil activation involved in immune response	biological_process	cellular process|immune system process|response to stimulus	3	1755	5	19037	0.00678245	0.0621893	6.50838	Fcer1g;Syk;Tyrobp
GO:0002286	T cell activation involved in immune response	biological_process	cellular process|immune system process|response to stimulus	2	1755	16	19037	0.441554	0.704458	1.35591	F2rl1;Lcp1
GO:0002309	T cell proliferation involved in immune response	biological_process	cellular process|immune system process|response to stimulus	2	1755	5	19037	0.070352	0.280328	4.33892	Slc11a1;Tnfsf18
GO:0002315	marginal zone B cell differentiation	biological_process	cellular process|developmental process|immune system process|multicellular organismal process|response to stimulus	1	1755	9	19037	0.581326	0.772752	1.20525	Bcl3
GO:0002318	myeloid progenitor cell differentiation	biological_process	cellular process|developmental process|immune system process|multicellular organismal process	1	1755	8	19037	0.53879	0.748901	1.35591	Mlf1
GO:0002320	lymphoid progenitor cell differentiation	biological_process	cellular process|developmental process|immune system process|multicellular organismal process	1	1755	7	19037	0.491934	0.73204	1.54961	Spi1
GO:0002322	B cell proliferation involved in immune response	biological_process	cellular process|immune system process|response to stimulus	2	1755	5	19037	0.070352	0.280328	4.33892	Cd180;Gapt
GO:0002374	cytokine secretion involved in immune response	biological_process	cellular process|establishment of localization|immune system process|localization|multicellular organismal process|response to stimulus	4	1755	5	19037	0.00033353	0.00697162	8.67783	Nlrp3;Tlr2;Trem1;Trem3
GO:0002376	immune system process	biological_process	NA	2	1755	19	19037	0.533766	0.748901	1.14182	Ido1;Olr1
GO:0002377	immunoglobulin production	biological_process	immune system process	3	1755	12	19037	0.0916384	0.330931	2.71182	Card11;Fas;Itm2a
GO:0002385	mucosal immune response	biological_process	immune system process|response to stimulus	1	1755	5	19037	0.38347	0.688406	2.16946	Ffar2
GO:0002407	dendritic cell chemotaxis	biological_process	cellular process|immune system process|localization|locomotion|response to stimulus	2	1755	6	19037	0.0992091	0.333151	3.61576	Gpr183;Trpm2
GO:0002430	complement receptor mediated signaling pathway	biological_process	biological regulation|cellular process|immune system process|positive regulation of biological process|regulation of biological process|response to stimulus|signaling	3	1755	12	19037	0.0916384	0.330931	2.71182	C3ar1;C5ar1;Fpr1
GO:0002437	inflammatory response to antigenic stimulus	biological_process	immune system process|response to stimulus	6	1755	20	19037	0.00759396	0.0681109	3.25419	Ccr5;Hmgb2;Hmgb2l1;Il1b;Il2ra;RT1-Db1
GO:0002438	acute inflammatory response to antigenic stimulus	biological_process	immune system process|response to stimulus	3	1755	12	19037	0.0916384	0.330931	2.71182	Cxcr2;Icam1;Serpinb9
GO:0002439	chronic inflammatory response to antigenic stimulus	biological_process	immune system process|response to stimulus	1	1755	5	19037	0.38347	0.688406	2.16946	Il1b
GO:0002446	neutrophil mediated immunity	biological_process	immune system process	4	1755	10	19037	0.00959641	0.0801	4.33892	Cd300lb;Cxcl6;Fcar;Myo1f
GO:0002455	humoral immune response mediated by circulating immunoglobulin	biological_process	immune system process|response to stimulus	4	1755	6	19037	0.000927189	0.0154001	7.23153	Bcl3;Exo1;RT1-Bb;RT1-Db1
GO:0002456	T cell mediated immunity	biological_process	immune system process|response to stimulus	1	1755	8	19037	0.53879	0.748901	1.35591	Myo1g
GO:0002467	germinal center formation	biological_process	developmental process|immune system process|response to stimulus	2	1755	7	19037	0.130648	0.394341	3.09923	Bcl3;Klhl6
GO:0002474	antigen processing and presentation of peptide antigen via MHC class I	biological_process	immune system process	1	1755	19	19037	0.840956	0.910743	0.57091	RT1-N3
GO:0002504	antigen processing and presentation of peptide or polysaccharide antigen via MHC class II	biological_process	immune system process	4	1755	5	19037	0.00033353	0.00697162	8.67783	RT1-Bb;RT1-Da;RT1-Db1;RT1-DOb
GO:0002523	leukocyte migration involved in inflammatory response	biological_process	cellular process|immune system process|localization|locomotion|response to stimulus	6	1755	14	19037	0.000952902	0.0156168	4.64884	Adam8;Ccl2;Itgam;Itgb2;S100a8;S100a9
GO:0002526	acute inflammatory response	biological_process	response to stimulus	6	1755	32	19037	0.0690721	0.280328	2.03387	Cxcl1;Defb1;Il1a;Il1b;Il6;S100a8
GO:0002544	chronic inflammatory response	biological_process	response to stimulus	8	1755	12	19037	1.81175e-06	0.000101561	7.23153	Bdnf;Ccl2;Ccl5;Gja1;S100a8;S100a9;Spn;Thbs1
GO:0002548	monocyte chemotaxis	biological_process	cellular process|immune system process|localization|locomotion|response to stimulus	10	1755	29	19037	0.000167948	0.00438352	3.74045	Anxa1;Ccl12;Ccl17;Ccl2;Ccl22;Ccl5;Ccl7;Ccl9;Folr2;Ptpro
GO:0002551	mast cell chemotaxis	biological_process	cellular process|immune system process|localization|locomotion|response to stimulus	1	1755	5	19037	0.38347	0.688406	2.16946	Ccr3
GO:0002553	histamine secretion by mast cell	biological_process	biological regulation|cellular process|establishment of localization|immune system process|localization|multicellular organismal process|response to stimulus|signaling	2	1755	5	19037	0.070352	0.280328	4.33892	Btk;Lyn
GO:0002573	myeloid leukocyte differentiation	biological_process	cellular process|developmental process|immune system process|multicellular organismal process	1	1755	5	19037	0.38347	0.688406	2.16946	Spi1
GO:0002606	positive regulation of dendritic cell antigen processing and presentation	biological_process	biological regulation|immune system process|positive regulation of biological process|regulation of biological process	3	1755	6	19037	0.0126377	0.096654	5.42365	Ccr7;Cd74;Slc11a1
GO:0002639	positive regulation of immunoglobulin production	biological_process	biological regulation|immune system process|positive regulation of biological process|regulation of biological process	3	1755	11	19037	0.0735992	0.284534	2.95835	Cd37;Sash3;Tlr9
GO:0002674	negative regulation of acute inflammatory response	biological_process	biological regulation|negative regulation of biological process|regulation of biological process|response to stimulus	2	1755	6	19037	0.0992091	0.333151	3.61576	Adora1;Nlrp3
GO:0002675	positive regulation of acute inflammatory response	biological_process	biological regulation|positive regulation of biological process|regulation of biological process|response to stimulus	3	1755	10	19037	0.0573429	0.263118	3.25419	Adam8;Il6;Pik3cg
GO:0002682	regulation of immune system process	biological_process	biological regulation|immune system process|regulation of biological process	1	1755	6	19037	0.440322	0.704458	1.80788	Ggt1
GO:0002686	negative regulation of leukocyte migration	biological_process	biological regulation|cellular process|immune system process|localization|locomotion|negative regulation of biological process|regulation of biological process	1	1755	5	19037	0.38347	0.688406	2.16946	Adora1
GO:0002687	positive regulation of leukocyte migration	biological_process	biological regulation|cellular process|immune system process|localization|locomotion|positive regulation of biological process|regulation of biological process	10	1755	22	19037	9.89841e-06	0.000453099	4.93059	Bdkrb1;Ccl12;Ccl2;Itga2;Itga4;Mmp9;Selp;Tlr2;Tnfrsf18;Tnfsf18
GO:0002690	positive regulation of leukocyte chemotaxis	biological_process	biological regulation|cellular process|immune system process|localization|locomotion|positive regulation of biological process|regulation of biological process|response to stimulus	10	1755	18	19037	9.46363e-07	6.14264e-05	6.02627	Cxcl1;Cxcl10;Cxcl11;Cxcl13;Cxcl2;Cxcl3;Cxcl6;Cxcl9;Cxcr2;F2rl1
GO:0002693	positive regulation of cellular extravasation	biological_process	biological regulation|cellular process|immune system process|localization|locomotion|positive regulation of biological process|regulation of biological process	5	1755	7	19037	0.000118632	0.00323323	7.74807	Adam8;Ccl2;Icam1;Ptafr;Thy1
GO:0002726	positive regulation of T cell cytokine production	biological_process	biological regulation|immune system process|multicellular organismal process|positive regulation of biological process|regulation of biological process|response to stimulus	1	1755	9	19037	0.581326	0.772752	1.20525	Sash3
GO:0002740	negative regulation of cytokine secretion involved in immune response	biological_process	biological regulation|cellular process|establishment of localization|immune system process|localization|multicellular organismal process|negative regulation of biological process|regulation of biological process|response to stimulus	1	1755	5	19037	0.38347	0.688406	2.16946	Il10
GO:0002741	positive regulation of cytokine secretion involved in immune response	biological_process	biological regulation|cellular process|establishment of localization|immune system process|localization|multicellular organismal process|positive regulation of biological process|regulation of biological process|response to stimulus	1	1755	9	19037	0.581326	0.772752	1.20525	F2rl1
GO:0002755	MyD88-dependent toll-like receptor signaling pathway	biological_process	biological regulation|cellular process|immune system process|positive regulation of biological process|regulation of biological process|response to stimulus|signaling	5	1755	13	19037	0.00453078	0.0497781	4.17204	Reg3g;Tlr2;Tlr7;Tlr8;Tlr9
GO:0002793	positive regulation of peptide secretion	biological_process	biological regulation|establishment of localization|localization|positive regulation of biological process|regulation of biological process	3	1755	5	19037	0.00678245	0.0621893	6.50838	Adora1;S100a8;S100a9
GO:0002819	regulation of adaptive immune response	biological_process	biological regulation|immune system process|regulation of biological process|response to stimulus	1	1755	5	19037	0.38347	0.688406	2.16946	Ripk3
GO:0002821	positive regulation of adaptive immune response	biological_process	biological regulation|immune system process|positive regulation of biological process|regulation of biological process|response to stimulus	1	1755	5	19037	0.38347	0.688406	2.16946	Sash3
GO:0002827	positive regulation of T-helper 1 type immune response	biological_process	biological regulation|immune system process|positive regulation of biological process|regulation of biological process|response to stimulus	2	1755	9	19037	0.198499	0.505521	2.41051	RT1-Bb;Slc11a1
GO:0002830	positive regulation of type 2 immune response	biological_process	biological regulation|immune system process|positive regulation of biological process|regulation of biological process|response to stimulus	3	1755	6	19037	0.0126377	0.096654	5.42365	Cd74;Ido1;Nlrp3
GO:0002860	positive regulation of natural killer cell mediated cytotoxicity directed against tumor cell target	biological_process	biological regulation|cell killing|immune system process|positive regulation of biological process|regulation of biological process|response to stimulus	4	1755	10	19037	0.00959641	0.0801	4.33892	Klrk1;Ncr3;PVR;Rrlt
GO:0002862	negative regulation of inflammatory response to antigenic stimulus	biological_process	biological regulation|immune system process|negative regulation of biological process|regulation of biological process|response to stimulus	2	1755	10	19037	0.233788	0.556728	2.16946	Gpx2;RT1-Db1
GO:0002903	negative regulation of B cell apoptotic process	biological_process	biological regulation|cellular process|negative regulation of biological process|regulation of biological process	2	1755	7	19037	0.130648	0.394341	3.09923	Aurkb;Hsh2d
GO:0002904	positive regulation of B cell apoptotic process	biological_process	biological regulation|cellular process|positive regulation of biological process|regulation of biological process	1	1755	5	19037	0.38347	0.688406	2.16946	Il10
GO:0002906	negative regulation of mature B cell apoptotic process	biological_process	biological regulation|cellular process|immune system process|negative regulation of biological process|regulation of biological process	2	1755	5	19037	0.070352	0.280328	4.33892	Cd44;Cd74
GO:0002925	positive regulation of humoral immune response mediated by circulating immunoglobulin	biological_process	biological regulation|immune system process|positive regulation of biological process|regulation of biological process|response to stimulus	1	1755	7	19037	0.491934	0.73204	1.54961	Ptprc
GO:0002931	response to ischemia	biological_process	response to stimulus	7	1755	50	19037	0.17376	0.473306	1.51862	Egr1;Fn1;Gja1;Gjb2;Map2k3;Ndnf;Rcan1
GO:0003007	heart morphogenesis	biological_process	developmental process|multicellular organismal process	6	1755	56	19037	0.413838	0.704458	1.16221	Aldh1a2;Col11a1;Col5a1;Foxc2;Gata4;Tgfb2
GO:0003009	skeletal muscle contraction	biological_process	multicellular organismal process	2	1755	30	19037	0.777931	0.877748	0.723153	Myh3;Tnnc1
GO:0003014	renal system process	biological_process	multicellular organismal process	3	1755	11	19037	0.0735992	0.284534	2.95835	Fas;Lgmn;Slc4a5
GO:0003016	respiratory system process	biological_process	multicellular organismal process	4	1755	12	19037	0.0194817	0.134142	3.61576	Ccbe1;Ecel1;Ndn;Sepn1
GO:0003056	regulation of vascular smooth muscle contraction	biological_process	biological regulation|multicellular organismal process|regulation of biological process	1	1755	5	19037	0.38347	0.688406	2.16946	Adra2b
GO:0003073	regulation of systemic arterial blood pressure	biological_process	biological regulation|multicellular organismal process	4	1755	23	19037	0.156633	0.447406	1.88649	Adamts16;Gja5;Postn;Slc4a5
GO:0003084	positive regulation of systemic arterial blood pressure	biological_process	biological regulation|multicellular organismal process	1	1755	9	19037	0.581326	0.772752	1.20525	Eng
GO:0003085	negative regulation of systemic arterial blood pressure	biological_process	biological regulation|multicellular organismal process	1	1755	16	19037	0.787358	0.877748	0.677956	Ier3
GO:0003094	glomerular filtration	biological_process	multicellular organismal process	2	1755	11	19037	0.269385	0.609577	1.97224	Ednra;Sulf1
GO:0003100	regulation of systemic arterial blood pressure by endothelin	biological_process	biological regulation|multicellular organismal process	1	1755	5	19037	0.38347	0.688406	2.16946	Edn1
GO:0003105	negative regulation of glomerular filtration	biological_process	biological regulation|multicellular organismal process|negative regulation of biological process|regulation of biological process	3	1755	5	19037	0.00678245	0.0621893	6.50838	F2r;Gja5;Ptpro
GO:0003148	outflow tract septum morphogenesis	biological_process	developmental process|multicellular organismal process	2	1755	27	19037	0.725443	0.846608	0.803503	Eng;Tgfb2
GO:0003149	membranous septum morphogenesis	biological_process	developmental process|multicellular organismal process	1	1755	10	19037	0.619941	0.789613	1.08473	Tgfb2
GO:0003151	outflow tract morphogenesis	biological_process	developmental process|multicellular organismal process	4	1755	50	19037	0.688832	0.826565	0.867783	Gja5;Heyl;Sox11;Thbs1
GO:0003158	endothelium development	biological_process	developmental process	3	1755	6	19037	0.0126377	0.096654	5.42365	Gja1;Gja4;Gja5
GO:0003161	cardiac conduction system development	biological_process	developmental process|multicellular organismal process	2	1755	5	19037	0.070352	0.280328	4.33892	Gja5;Nrg1
GO:0003170	heart valve development	biological_process	developmental process|multicellular organismal process	1	1755	10	19037	0.619941	0.789613	1.08473	Prdm1
GO:0003179	heart valve morphogenesis	biological_process	developmental process|multicellular organismal process	3	1755	8	19037	0.0307483	0.178239	4.06774	Adamts9;Tgfb1;Tgfb2
GO:0003181	atrioventricular valve morphogenesis	biological_process	developmental process|multicellular organismal process	4	1755	14	19037	0.0339698	0.188708	3.09923	Cyr61;Gata4;Heyl;Tgfb2
GO:0003184	pulmonary valve morphogenesis	biological_process	developmental process|multicellular organismal process	3	1755	11	19037	0.0735992	0.284534	2.95835	Heyl;Stra6;Tgfb2
GO:0003197	endocardial cushion development	biological_process	developmental process|multicellular organismal process	4	1755	13	19037	0.0261266	0.162116	3.33763	Erg;Gata4;Thbs1;Tmem100
GO:0003198	epithelial to mesenchymal transition involved in endocardial cushion formation	biological_process	cellular process|developmental process|multicellular organismal process	4	1755	13	19037	0.0261266	0.162116	3.33763	Eng;Heyl;Snai1;Tmem100
GO:0003203	endocardial cushion morphogenesis	biological_process	developmental process|multicellular organismal process	3	1755	17	19037	0.202394	0.507839	1.91423	Eng;Heyl;Tgfb2
GO:0003208	cardiac ventricle morphogenesis	biological_process	developmental process|multicellular organismal process	2	1755	9	19037	0.198499	0.505521	2.41051	Eng;Heyl
GO:0003209	cardiac atrium morphogenesis	biological_process	developmental process|multicellular organismal process	1	1755	7	19037	0.491934	0.73204	1.54961	Eng
GO:0003211	cardiac ventricle formation	biological_process	developmental process|multicellular organismal process	1	1755	5	19037	0.38347	0.688406	2.16946	Sox11
GO:0003215	cardiac right ventricle morphogenesis	biological_process	developmental process|multicellular organismal process	2	1755	13	19037	0.340143	0.688406	1.66881	Gata4;Tgfb2
GO:0003222	ventricular trabecula myocardium morphogenesis	biological_process	developmental process|multicellular organismal process	3	1755	17	19037	0.202394	0.507839	1.91423	Eng;Nrg1;Tgfb2
GO:0003229	ventricular cardiac muscle tissue development	biological_process	developmental process|multicellular organismal process	2	1755	6	19037	0.0992091	0.333151	3.61576	Adamts9;Gata4
GO:0003231	cardiac ventricle development	biological_process	developmental process|multicellular organismal process	1	1755	8	19037	0.53879	0.748901	1.35591	Scn5a
GO:0003254	regulation of membrane depolarization	biological_process	biological regulation|cellular process|regulation of biological process	1	1755	10	19037	0.619941	0.789613	1.08473	Cftr
GO:0003279	cardiac septum development	biological_process	developmental process|multicellular organismal process	5	1755	19	19037	0.0257095	0.162116	2.85455	Adamts6;Gata4;Myh10;Pcsk5;Prdm1
GO:0003281	ventricular septum development	biological_process	developmental process|multicellular organismal process	9	1755	38	19037	0.00655015	0.0621893	2.5691	Cxcr4;Cyr61;Gata4;Gja5;Pax8;Prdm1;Ptk7;Stra6;Xirp2
GO:0003283	atrial septum development	biological_process	developmental process|multicellular organismal process	1	1755	7	19037	0.491934	0.73204	1.54961	Gja5
GO:0003289	atrial septum primum morphogenesis	biological_process	developmental process|multicellular organismal process	2	1755	5	19037	0.070352	0.280328	4.33892	Gata4;Tgfb2
GO:0003333	amino acid transmembrane transport	biological_process	establishment of localization|localization	5	1755	35	19037	0.216971	0.535694	1.54961	Slc36a3;Slc38a4;Slc7a11;Slc7a5;Slc7a6
GO:0003334	keratinocyte development	biological_process	cellular process|developmental process|multicellular organismal process	1	1755	13	19037	0.715711	0.839021	0.834407	Bcl11b
GO:0003337	mesenchymal to epithelial transition involved in metanephros morphogenesis	biological_process	cellular process|developmental process|multicellular organismal process	3	1755	7	19037	0.0206121	0.134142	4.64884	Gdnf;Grem1;Pax8
GO:0003360	brainstem development	biological_process	developmental process	1	1755	7	19037	0.491934	0.73204	1.54961	Scn5a
GO:0003374	dynamin family protein polymerization involved in mitochondrial fission	biological_process	cellular component organization or biogenesis|cellular process	1	1755	7	19037	0.491934	0.73204	1.54961	Mx1
GO:0003376	sphingosine-1-phosphate signaling pathway	biological_process	biological regulation|cellular process|regulation of biological process|response to stimulus|signaling	1	1755	12	19037	0.686821	0.824954	0.903941	Sphk1
GO:0003382	epithelial cell morphogenesis	biological_process	cellular component organization or biogenesis|cellular process|developmental process	1	1755	23	19037	0.892028	0.93985	0.471621	Bcl11b
GO:0003407	neural retina development	biological_process	developmental process|multicellular organismal process	2	1755	19	19037	0.533766	0.748901	1.14182	Slc17a6;Tgfb2
GO:0003417	growth plate cartilage development	biological_process	developmental process|growth|multicellular organismal process	1	1755	10	19037	0.619941	0.789613	1.08473	Thbs1
GO:0003674	molecular_function	molecular_function	NA	258	1755	2382	19037	0.00241118	0.0308144	1.1749	Abcc4;Actg2;Adam12;Adam19;Adam8;Adam9;Adamts1;Adamts12;Ahsp;Aim1;Aim2;Angpt4;Ankh;Apol2;Arl4c;Arntl2;Aspm;Bank1;Bard1;Birc5;Bmpr1b;Bst1;Bub1;Bub1b;C1qa;C1qb;C1qc;Camp;Card11;Ccl12;Ccl22;Ccna2;Ccr4;Cd247;Cd3e;Cd80;Cdc6;Cdc7;Cdh24;Cdhr1;Cdkn2b;Cdkn3;Cdsn;Ces2h;Cfi;Cfp;Chi3l1;Chsy1;Ciita;Cilp;Cks2;Clca1;Coch;Col18a1;Col1a2;Col3a1;Col4a1;Col4a2;Col6a2;Col6a3;Col7a1;Coro1a;Crlf1;Csf1r;Csf2ra;Csf2rb;Cs…
GO:0003676	nucleic acid binding	molecular_function	binding	11	1755	450	19037	1	1	0.265156	Ang2;Bnc1;Dbf4;Enpp3;Impdh1;Rcan1;Rexo2;Rnase6;Wt1;Zcchc12;Zfp575
GO:0003677	DNA binding	molecular_function	binding	117	1755	968	19037	0.00133774	0.0200579	1.31109	Ankrd1;Apitd1;Arnt2;Bcl3;Bcl6b;Bhlhe40;Brip1;Carhsp1;Ccdc81;Cdt1;Cebpd;Cebpe;Cenpt;Cenpw;Creb3l4;Dhx58;Dntt;E2f1;E2f3;E2f7;E2f8;Egr1;Egr2;Eme1;Etv4;Exo1;Fen1;Foxc2;Foxm1;Foxs1;Gata4;Gen1;Glis1;Glis3;Gsg2;H2afx;H2afy2;Hist1h1a;Hist1h1b;Hist1h1d;Hist1h2ac;Hist1h2ah;Hist1h2ai;Hist1h2ak;Hist1h2an;Hist1h2ao;Hist1h2ba;Hist1h2bcl1;Hist1h2bd;Hist1h2bf;Hist1h2bh;Hist1h2bk;Hist1h2bl;Hist1h2bo;Hist2h2aa3;Hi…
GO:0003678	DNA helicase activity	molecular_function	catalytic activity	4	1755	20	19037	0.106182	0.351304	2.16946	Mcm2;Mcm4;Mcm5;Mcm6
GO:0003680	AT DNA binding	molecular_function	binding	1	1755	9	19037	0.581326	0.772752	1.20525	Hmga2
GO:0003682	chromatin binding	molecular_function	binding	39	1755	487	19037	0.845237	0.914388	0.868674	Apitd1;Bend6;Brca1;Brip1;Cdc45;Cdc6;Cdca5;Cdk1;Cdt1;Cks2;Egr2;Eomes;Erg;Exo1;Gata4;Gmnn;Hells;Hmgb2;LOC691153;Mb21d1;Mcm5;Meox1;Ncapd2;Ns5atp9;Plac8;Pole;Polq;Rad51;Skil;Smc2;Smc4;Suv39h2;Ticrr;Top2a;Tp73;Trim66;Ube2t;Wdhd1;Zc3h12a
GO:0003684	damaged DNA binding	molecular_function	binding	6	1755	57	19037	0.430764	0.704458	1.14182	Aunip;Brca1;H2afx;Hmgb2;Neil3;Tp73
GO:0003688	DNA replication origin binding	molecular_function	binding	5	1755	13	19037	0.00453078	0.0497781	4.17204	Cdc45;Mcm10;Mcm2;Mcm5;Orc6
GO:0003689	DNA clamp loader activity	molecular_function	binding|catalytic activity	2	1755	9	19037	0.198499	0.505521	2.41051	Chtf18;Dscc1
GO:0003690	double-stranded DNA binding	molecular_function	binding	16	1755	145	19037	0.261553	0.609178	1.19694	Aim2;Apitd1;Defb1;Egr1;Hist1h1d;Hmgb2;Hmgb2l1;LOC103690068;Mb21d1;Mcm10;Neil3;Rad51;Rad51ap1;Rad51c;Tp73;Wt1
GO:0003697	single-stranded DNA binding	molecular_function	binding	16	1755	95	19037	0.0128974	0.0984871	1.82691	Anxa1;Cdc45;Hmgb2;Hmgb2l1;LOC103690068;LOC680663;Mcm10;Mcm4;Mcm6;Neil3;Prim1;Rad51;Rad51ap1;Rad51c;Smc2;Smc4
GO:0003700	DNA binding transcription factor activity	molecular_function	NA	43	1755	726	19037	0.999636	1	0.642471	Arnt2;Arntl2;Bcl11b;Bcl3;E2f1;E2f3;E2f7;E2f8;Egr1;Egr2;Erg;Etv4;Foxc2;Foxm1;Gata4;Glis3;Heyl;Hmga2;Hmgb2;Ikzf1;Irf5;Klhl6;Maff;Meox1;Myrf;Nfe2;Nfil3;Pax8;Phf19;Pou2f2;RGD1560020_predicted;Sox11;Sox18;Sox21;Spi1;Spib;Tbx21;Tcfl5;Tead4;Tp73;Wt1;Zfp367;Zic3
GO:0003705	transcription factor activity, RNA polymerase II distal enhancer sequence-specific binding	molecular_function	NA	5	1755	68	19037	0.763135	0.867375	0.797595	Bhlhe40;Foxc2;Gata4;Spi1;Vgll3
GO:0003707	steroid hormone receptor activity	molecular_function	molecular transducer activity|receptor activity	4	1755	55	19037	0.758716	0.867375	0.788894	Nr4a1;Nr4a3;Olr59;Pgr
GO:0003712	transcription cofactor activity	molecular_function	protein binding transcription factor activity	6	1755	61	19037	0.497377	0.739247	1.06695	Ankrd1;Fhl3;LOC100910438;Muc1;Nfkbiz;Nrg1
GO:0003713	transcription coactivator activity	molecular_function	protein binding transcription factor activity	2	1755	186	19037	1	1	0.116638	Gata4;Pmf1
GO:0003714	transcription corepressor activity	molecular_function	protein binding transcription factor activity	9	1755	146	19037	0.929946	0.966995	0.668669	Ankrd1;Basp1;Bhlhe40;E2f7;E2f8;Gmnn;Heyl;Skil;Trib3
GO:0003723	RNA binding	molecular_function	binding	17	1755	477	19037	1	1	0.386591	Apobec1;Apobec3b;Bard1;Brca1;Ddx43;Eno1;Ifit3;Lsm4;Ooep;Rad51ap1;Rbm3;Samd4a;Wdhd1;Wt1;Zbp1;Zc3h12a;Zmat4
GO:0003725	double-stranded RNA binding	molecular_function	binding	16	1755	71	19037	0.000609214	0.0111719	2.44446	Actn1;Dhx58;Msn;Myh4;Oas1a;Oas1b;Oas1i;Oas2;Oas3;Oasl;Oasl2;Tfrc;Tlr7;Tlr8;Tuba1b;Vim
GO:0003727	single-stranded RNA binding	molecular_function	binding	6	1755	46	19037	0.247022	0.585002	1.41486	Anxa1;Dhx58;Mex3b;Rbm11;Tlr7;Tlr8
GO:0003729	mRNA binding	molecular_function	binding	8	1755	158	19037	0.981708	0.998303	0.54923	Apobec1;Calr;Dhfr;Noct;Samd4a;Slpi;Tyms;Zc3h12a
GO:0003730	mRNA 3'-UTR binding	molecular_function	binding	2	1755	67	19037	0.988133	1	0.3238	Carhsp1;Zc3h12a
GO:0003735	structural constituent of ribosome	molecular_function	structural molecule activity	1	1755	231	19037	1	1	0.046958	LOC100910528
GO:0003755	peptidyl-prolyl cis-trans isomerase activity	molecular_function	catalytic activity	2	1755	36	19037	0.857089	0.919535	0.602627	Fkbp10;Fkbp11
GO:0003756	protein disulfide isomerase activity	molecular_function	catalytic activity	3	1755	19	19037	0.252891	0.592923	1.71273	P4hb;Pdia6;Txndc5
GO:0003774	motor activity	molecular_function	catalytic activity	5	1755	21	19037	0.0386015	0.207883	2.58269	Dynlt1;Gpr88;Kif18b;Myo10;Myo7a
GO:0003777	microtubule motor activity	molecular_function	catalytic activity	23	1755	98	19037	2.18787e-05	0.000899397	2.54579	Cenpe;Kif11;Kif14;Kif15;Kif18a;Kif18b;Kif20a;Kif20b;Kif22;Kif23;Kif2c;Kif4a;Kif5c;Kifc1;Myh1;Myh10;Myh2;Myh3;Myh4;Myo10;Myo1f;Myo1g;Myo7a
GO:0003779	actin binding	molecular_function	binding	38	1755	243	19037	0.000867514	0.0151753	1.69628	Add2;Anln;Ccr5;Cfl1;Cnn1;Cnn2;Coro1a;Cotl1;Cxcr4;Dbn1;Diaph3;Fhl3;Fmnl3;Fscn1;Fxyd5;Gas2l3;Gmfg;Hcls1;Itgb1;Kif18a;Map1b;Mefv;Msn;Myo10;Myo1f;Myo1g;Myo7a;Myoz3;Nos2;Parvg;Pdlim5;Pls3;Pstpip2;S100a4;Scnn1a;Slc4a1;Was;Xirp2
GO:0003785	actin monomer binding	molecular_function	binding	4	1755	25	19037	0.194303	0.505521	1.73557	Coro1a;Lima1;Myl4;Tmsb10
GO:0003796	lysozyme activity	molecular_function	catalytic activity	3	1755	15	19037	0.154716	0.444764	2.16946	Lyc2;Lyz2;Spaca4
GO:0003810	protein-glutamine gamma-glutamyltransferase activity	molecular_function	catalytic activity	1	1755	8	19037	0.53879	0.748901	1.35591	Tgm1
GO:0003823	antigen binding	molecular_function	binding	5	1755	15	19037	0.00904529	0.0786956	3.61576	Cd2;Cd40;Itga4;Lck;Tgfb1
GO:0003824	catalytic activity	molecular_function	NA	5	1755	72	19037	0.80523	0.889729	0.753284	Cth;Hhipl1;Mest;Pcyt1b;Rsad2
GO:0003847	1-alkyl-2-acetylglycerophosphocholine esterase activity	molecular_function	catalytic activity	1	1755	5	19037	0.38347	0.688406	2.16946	Pla2g7
GO:0003854	3-beta-hydroxy-delta5-steroid dehydrogenase activity	molecular_function	catalytic activity	1	1755	5	19037	0.38347	0.688406	2.16946	Hsd3b6
GO:0003887	DNA-directed DNA polymerase activity	molecular_function	catalytic activity	5	1755	25	19037	0.0744107	0.286325	2.16946	Dntt;Pola2;Pole;Pole2;Polq
GO:0003906	DNA-(apurinic or apyrimidinic site) endonuclease activity	molecular_function	catalytic activity	2	1755	12	19037	0.304935	0.660045	1.80788	Hmga2;Neil3
GO:0003924	GTPase activity	molecular_function	catalytic activity	26	1755	278	19037	0.499653	0.741959	1.0145	Gbp2;Gch1;Gngt2;Ifi47;Irgc;LOC100909441;Mpa2l;Mx1;Rab13;Rab32;Rac2;Ran;Rasl11b;RGD1559575;Rnd1;Rnd3;Rras2;Sept11;Sept5;Tuba1a;Tuba1b;Tubb1;Tubb2a;Tubb2b;Tubb3;Tubb5
GO:0003951	NAD+ kinase activity	molecular_function	catalytic activity	1	1755	16	19037	0.787358	0.877748	0.677956	Sphk1
GO:0003958	NADPH-hemoprotein reductase activity	molecular_function	catalytic activity	1	1755	8	19037	0.53879	0.748901	1.35591	Nos2
GO:0004003	ATP-dependent DNA helicase activity	molecular_function	catalytic activity	3	1755	23	19037	0.357274	0.688406	1.41486	Brip1;Mcm4;Mcm6
GO:0004004	ATP-dependent RNA helicase activity	molecular_function	catalytic activity	1	1755	65	19037	0.99816	1	0.166881	Ddx43
GO:0004012	phospholipid-translocating ATPase activity	molecular_function	catalytic activity|transporter activity	1	1755	17	19037	0.806977	0.889729	0.638076	Atp8b4
GO:0004016	adenylate cyclase activity	molecular_function	catalytic activity	2	1755	21	19037	0.589171	0.779191	1.03308	Adcy2;Adcy7
GO:0004022	alcohol dehydrogenase (NAD) activity	molecular_function	catalytic activity	1	1755	7	19037	0.491934	0.73204	1.54961	Adh7
GO:0004028	3-chloroallyl aldehyde dehydrogenase activity	molecular_function	catalytic activity	3	1755	9	19037	0.043019	0.217503	3.61576	Aldh1a2;Aldh1a3;Aldh1a7
GO:0004029	aldehyde dehydrogenase (NAD) activity	molecular_function	catalytic activity	4	1755	15	19037	0.0430333	0.217503	2.89261	Aldh1a2;Aldh1a3;Aldh1a7;Aldh1l2
GO:0004030	aldehyde dehydrogenase [NAD(P)+] activity	molecular_function	catalytic activity	1	1755	6	19037	0.440322	0.704458	1.80788	Aldh1a3
GO:0004031	aldehyde oxidase activity	molecular_function	catalytic activity	2	1755	5	19037	0.070352	0.280328	4.33892	Adh7;Aox2
GO:0004032	alditol:NADP+ 1-oxidoreductase activity	molecular_function	catalytic activity	2	1755	20	19037	0.562097	0.772752	1.08473	Akr1b8;Akr7a3
GO:0004033	aldo-keto reductase (NADP) activity	molecular_function	catalytic activity	2	1755	7	19037	0.130648	0.394341	3.09923	Akr7a3;Kcnab2
GO:0004035	alkaline phosphatase activity	molecular_function	catalytic activity	1	1755	7	19037	0.491934	0.73204	1.54961	Cilp
GO:0004045	aminoacyl-tRNA hydrolase activity	molecular_function	catalytic activity	1	1755	5	19037	0.38347	0.688406	2.16946	Ptrhd1
GO:0004064	arylesterase activity	molecular_function	catalytic activity	2	1755	6	19037	0.0992091	0.333151	3.61576	Car1;Car2
GO:0004065	arylsulfatase activity	molecular_function	catalytic activity	1	1755	6	19037	0.440322	0.704458	1.80788	Sulf1
GO:0004089	carbonate dehydratase activity	molecular_function	catalytic activity	3	1755	13	19037	0.111292	0.362139	2.50322	Car1;Car13;Car2
GO:0004111	creatine kinase activity	molecular_function	catalytic activity	2	1755	5	19037	0.070352	0.280328	4.33892	Ckmt1b;Ckmt2
GO:0004126	cytidine deaminase activity	molecular_function	catalytic activity	2	1755	7	19037	0.130648	0.394341	3.09923	Apobec1;Apobec3b
GO:0004129	cytochrome-c oxidase activity	molecular_function	catalytic activity|electron carrier activity|transporter activity	3	1755	24	19037	0.383295	0.688406	1.35591	Cox6a2;MGC105649;Ndufa4l2
GO:0004169	dolichyl-phosphate-mannose-protein mannosyltransferase activity	molecular_function	catalytic activity	1	1755	5	19037	0.38347	0.688406	2.16946	Sdf2l1
GO:0004175	endopeptidase activity	molecular_function	catalytic activity	13	1755	93	19037	0.0846063	0.319818	1.51629	Adamts20;Adamts3;Adamts9;Casp12;Cma1;Fap;Mmp9;Napsa;Pappa;Pcsk1;Pcsk5;Pcsk6;Ren
GO:0004180	carboxypeptidase activity	molecular_function	catalytic activity	1	1755	18	19037	0.824788	0.899354	0.602627	Ctsz
GO:0004181	metallocarboxypeptidase activity	molecular_function	catalytic activity	3	1755	25	19037	0.409067	0.704458	1.30168	Cpa3;Cpa4;Cpz
GO:0004185	serine-type carboxypeptidase activity	molecular_function	catalytic activity	1	1755	10	19037	0.619941	0.789613	1.08473	Cpz
GO:0004190	aspartic-type endopeptidase activity	molecular_function	catalytic activity	3	1755	18	19037	0.227376	0.556728	1.80788	Napsa;Nrip3;Ren
GO:0004197	cysteine-type endopeptidase activity	molecular_function	catalytic activity	7	1755	58	19037	0.284788	0.638282	1.30916	Casp12;Ctsk;Ctss;Ctsz;Espl1;Lgmn;Sfrp1
GO:0004198	calcium-dependent cysteine-type endopeptidase activity	molecular_function	catalytic activity	2	1755	20	19037	0.562097	0.772752	1.08473	Adgb;Capn6
GO:0004222	metalloendopeptidase activity	molecular_function	catalytic activity	26	1755	108	19037	3.97071e-06	0.000210751	2.61139	Adam12;Adam19;Adam8;Adam9;Adamdec1;Adamts1;Adamts12;Adamts16;Adamts20;Adamts3;Adamts4;Adamts6;Adamts8;Adamts9;Ecel1;Mmp10;Mmp17;Mmp19;Mmp2;Mmp23;Mmp7;Mmp8;Mmp9;Pappa;Tll1;Trabd2b
GO:0004252	serine-type endopeptidase activity	molecular_function	catalytic activity	32	1755	202	19037	0.00171869	0.024718	1.71838	C2;Cfi;Cma1;Ctrb1;Ctrc;Ctss;Dpp4;F10;F3;Fap;Gzmk;Htra1;Klk14;LOC100910418;Masp1;Mcpt1l1;Mmp2;Mmp8;Mmp9;Pcsk1;Pcsk5;Pcsk6;Pcsk9;Plat;Plau;Prss12;Prss23;Prss35;Tmprss11b;Tmprss11f;Tmprss11g;Tpsab1
GO:0004300	enoyl-CoA hydratase activity	molecular_function	catalytic activity	1	1755	8	19037	0.53879	0.748901	1.35591	Echs1
GO:0004340	glucokinase activity	molecular_function	catalytic activity	1	1755	5	19037	0.38347	0.688406	2.16946	Hk3
GO:0004364	glutathione transferase activity	molecular_function	catalytic activity	7	1755	43	19037	0.096517	0.333151	1.76584	Clic1;Clic4;Gsta2;Gsta3;Gsta5;Gstm1;Gstp1
GO:0004383	guanylate cyclase activity	molecular_function	catalytic activity	2	1755	20	19037	0.562097	0.772752	1.08473	Adcy2;Adcy7
GO:0004386	helicase activity	molecular_function	catalytic activity	3	1755	26	19037	0.434498	0.704458	1.25161	Anxa1;Mcm3;Mcm8
GO:0004407	histone deacetylase activity	molecular_function	catalytic activity	1	1755	27	19037	0.926707	0.964236	0.401752	Brms1
GO:0004415	hyalurononglucosaminidase activity	molecular_function	catalytic activity	1	1755	9	19037	0.581326	0.772752	1.20525	Cemip
GO:0004435	phosphatidylinositol phospholipase C activity	molecular_function	catalytic activity	2	1755	17	19037	0.473442	0.73204	1.27615	Ccl5;Plcb1
GO:0004445	inositol-polyphosphate 5-phosphatase activity	molecular_function	catalytic activity	1	1755	6	19037	0.440322	0.704458	1.80788	Inpp5d
GO:0004452	isopentenyl-diphosphate delta-isomerase activity	molecular_function	catalytic activity	1	1755	5	19037	0.38347	0.688406	2.16946	Idi1
GO:0004468	lysine N-acetyltransferase activity, acting on acetyl phosphate as donor	molecular_function	catalytic activity	1	1755	6	19037	0.440322	0.704458	1.80788	Esco2
GO:0004497	monooxygenase activity	molecular_function	catalytic activity	6	1755	62	19037	0.513633	0.748901	1.04974	Cyp11b2;Cyp1b1;Cyp27b1;Cyp2d1;Kmo;Ptgis
GO:0004519	endonuclease activity	molecular_function	catalytic activity	4	1755	38	19037	0.469365	0.73204	1.14182	Ang2;Ankle1;Ern2;Rnase6
GO:0004520	endodeoxyribonuclease activity	molecular_function	catalytic activity	2	1755	18	19037	0.5042	0.743341	1.20525	Rad51;Rad51c
GO:0004521	endoribonuclease activity	molecular_function	catalytic activity	2	1755	24	19037	0.662814	0.815174	0.903941	Slfn14;Zc3h12a
GO:0004526	ribonuclease P activity	molecular_function	catalytic activity	1	1755	10	19037	0.619941	0.789613	1.08473	Rpp25
GO:0004527	exonuclease activity	molecular_function	catalytic activity	1	1755	12	19037	0.686821	0.824954	0.903941	Fen1
GO:0004528	phosphodiesterase I activity	molecular_function	catalytic activity	1	1755	5	19037	0.38347	0.688406	2.16946	Enpp3
GO:0004532	exoribonuclease activity	molecular_function	catalytic activity	1	1755	13	19037	0.715711	0.839021	0.834407	Zc3h12a
GO:0004535	poly(A)-specific ribonuclease activity	molecular_function	catalytic activity	1	1755	13	19037	0.715711	0.839021	0.834407	Noct
GO:0004540	ribonuclease activity	molecular_function	catalytic activity	4	1755	26	19037	0.214094	0.531251	1.66881	Ang2;Ern2;Rnase6;Zc3h12a
GO:0004550	nucleoside diphosphate kinase activity	molecular_function	catalytic activity	1	1755	17	19037	0.806977	0.889729	0.638076	Nme2
GO:0004551	nucleotide diphosphatase activity	molecular_function	catalytic activity	2	1755	5	19037	0.070352	0.280328	4.33892	Cilp;Enpp3
GO:0004553	hydrolase activity, hydrolyzing O-glycosyl compounds	molecular_function	catalytic activity	1	1755	11	19037	0.654997	0.810409	0.986118	Lctl
GO:0004559	alpha-mannosidase activity	molecular_function	catalytic activity	1	1755	8	19037	0.53879	0.748901	1.35591	Edem1
GO:0004568	chitinase activity	molecular_function	catalytic activity	1	1755	8	19037	0.53879	0.748901	1.35591	Chi3l1
GO:0004571	mannosyl-oligosaccharide 1,2-alpha-mannosidase activity	molecular_function	catalytic activity	1	1755	8	19037	0.53879	0.748901	1.35591	Edem1
GO:0004601	peroxidase activity	molecular_function	antioxidant activity|catalytic activity	6	1755	19	19037	0.00575807	0.0614817	3.42546	Cygb;Gpx7;Hbb;Prdx1;Ptgs2;Pxdn
GO:0004602	glutathione peroxidase activity	molecular_function	antioxidant activity|catalytic activity	3	1755	22	19037	0.331103	0.688406	1.47918	Gpx2;Gpx7;Gstp1
GO:0004614	phosphoglucomutase activity	molecular_function	catalytic activity	1	1755	5	19037	0.38347	0.688406	2.16946	Pgm3
GO:0004620	phospholipase activity	molecular_function	catalytic activity	1	1755	13	19037	0.715711	0.839021	0.834407	Lipg
GO:0004622	lysophospholipase activity	molecular_function	catalytic activity	1	1755	19	19037	0.840956	0.910743	0.57091	Pla2g4f
GO:0004623	phospholipase A2 activity	molecular_function	catalytic activity	2	1755	24	19037	0.662814	0.815174	0.903941	Pla2g2d;Pla2g4f
GO:0004629	phospholipase C activity	molecular_function	catalytic activity	1	1755	7	19037	0.491934	0.73204	1.54961	Adora1
GO:0004630	phospholipase D activity	molecular_function	catalytic activity	2	1755	7	19037	0.130648	0.394341	3.09923	Hmox1;Pld4
GO:0004634	phosphopyruvate hydratase activity	molecular_function	catalytic activity	1	1755	5	19037	0.38347	0.688406	2.16946	Eno1
GO:0004653	polypeptide N-acetylgalactosaminyltransferase activity	molecular_function	catalytic activity	1	1755	18	19037	0.824788	0.899354	0.602627	Galnt16
GO:0004668	protein-arginine deiminase activity	molecular_function	catalytic activity	2	1755	5	19037	0.070352	0.280328	4.33892	Padi3;Padi4
GO:0004672	protein kinase activity	molecular_function	catalytic activity	25	1755	257	19037	0.419535	0.704458	1.05518	Aurka;Aurkb;Bub1;Bub1b;Ccl12;Ccl5;Cdc7;Cdk1;Chek1;Fes;Gsg2;LOC100912399;Lyn;Melk;Met;Nek2;Pak1;Pdgfrb;Peak1;Plk1;Plk3;Ripk3;Spag5;Syk;Ttbk1
GO:0004674	protein serine/threonine kinase activity	molecular_function	catalytic activity	31	1755	333	19037	0.505121	0.744476	1.00981	Alpk3;Aurka;Aurkb;Bmpr1b;Camk2b;Cdc7;Cdk1;Chek1;Cit;Ern2;Fam20c;Gsg2;LOC100912399;Map2k3;Mastl;Melk;Nek6;Nme2;Nuak1;Nuak2;Pak1;Pbk;Pkmyt1;Plk1;Plk3;Plk4;Ripk3;Stk38l;Syk;Trpm6;Ttbk1
GO:0004675	transmembrane receptor protein serine/threonine kinase activity	molecular_function	catalytic activity|molecular transducer activity|receptor activity	1	1755	12	19037	0.686821	0.824954	0.903941	Bmpr1b
GO:0004679	AMP-activated protein kinase activity	molecular_function	catalytic activity|molecular transducer activity	1	1755	20	19037	0.855633	0.919372	0.542365	Melk
GO:0004683	calmodulin-dependent protein kinase activity	molecular_function	catalytic activity	1	1755	21	19037	0.868956	0.925897	0.516538	Camk2b
GO:0004693	cyclin-dependent protein serine/threonine kinase activity	molecular_function	catalytic activity|molecular transducer activity	1	1755	29	19037	0.939615	0.972743	0.374045	Cdk1
GO:0004702	signal transducer, downstream of receptor, with serine/threonine kinase activity	molecular_function	NA	1	1755	14	19037	0.741937	0.853711	0.774807	Bmpr1b
GO:0004707	MAP kinase activity	molecular_function	catalytic activity	1	1755	16	19037	0.787358	0.877748	0.677956	Mapk10
GO:0004708	MAP kinase kinase activity	molecular_function	catalytic activity	1	1755	12	19037	0.686821	0.824954	0.903941	Map2k3
GO:0004709	MAP kinase kinase kinase activity	molecular_function	catalytic activity	8	1755	79	19037	0.445391	0.71012	1.09846	Axl;Csf1r;Ephb2;Insrr;Met;Pak1;Pdgfrb;Ret
GO:0004712	protein serine/threonine/tyrosine kinase activity	molecular_function	catalytic activity	3	1755	22	19037	0.331103	0.688406	1.47918	Aurka;Aurkb;Ttk
GO:0004713	protein tyrosine kinase activity	molecular_function	catalytic activity	15	1755	104	19037	0.0540999	0.25785	1.56451	Axl;Btk;Csf1r;Ephb2;Fes;Fgr;Hck;Insrr;Jak3;Lck;Lyn;Met;Pdgfrb;Ret;Syk
GO:0004714	transmembrane receptor protein tyrosine kinase activity	molecular_function	catalytic activity|molecular transducer activity|receptor activity	8	1755	56	19037	0.140489	0.411783	1.54961	Axl;Csf1r;Ephb2;Insrr;Met;Pdgfrb;Ptk7;Ret
GO:0004715	non-membrane spanning protein tyrosine kinase activity	molecular_function	catalytic activity	13	1755	54	19037	0.00100529	0.0163128	2.61139	Btk;Fes;Fgr;Grap;Hck;Jak3;Lck;Lyn;Matk;Melk;Peak1;Sla;Syk
GO:0004716	signal transducer, downstream of receptor, with protein tyrosine kinase activity	molecular_function	NA	1	1755	9	19037	0.581326	0.772752	1.20525	Syk
GO:0004720	protein-lysine 6-oxidase activity	molecular_function	catalytic activity	4	1755	6	19037	0.000927189	0.0154001	7.23153	Lox;Loxl1;Loxl2;Loxl4
GO:0004721	phosphoprotein phosphatase activity	molecular_function	catalytic activity	3	1755	45	19037	0.797156	0.885669	0.723153	Dlgap5;Dusp2;Ppef1
GO:0004722	protein serine/threonine phosphatase activity	molecular_function	catalytic activity	3	1755	48	19037	0.831695	0.906485	0.677956	Cdkn3;Lck;Ppm1n
GO:0004725	protein tyrosine phosphatase activity	molecular_function	catalytic activity	13	1755	96	19037	0.102458	0.342661	1.4689	Cdc25c;Cdkn3;Dusp2;Dusp4;Eya2;Ptpn22;Ptpn6;Ptpn7;Ptprc;Ptprn;Ptpro;Ptprq;Ptprv
GO:0004745	retinol dehydrogenase activity	molecular_function	catalytic activity	2	1755	16	19037	0.441554	0.704458	1.35591	Adh7;Rdh12
GO:0004771	sterol esterase activity	molecular_function	catalytic activity	1	1755	16	19037	0.787358	0.877748	0.677956	Ces2h
GO:0004784	superoxide dismutase activity	molecular_function	antioxidant activity|catalytic activity	1	1755	5	19037	0.38347	0.688406	2.16946	Nqo1
GO:0004791	thioredoxin-disulfide reductase activity	molecular_function	antioxidant activity|catalytic activity	2	1755	11	19037	0.269385	0.609577	1.97224	Txn1;Txnrd1
GO:0004806	triglyceride lipase activity	molecular_function	catalytic activity	1	1755	31	19037	0.950251	0.979438	0.349913	Ces2h
GO:0004842	ubiquitin-protein transferase activity	molecular_function	catalytic activity	18	1755	329	19037	0.995718	1	0.593469	Bard1;Birc5;Brca1;Ccnf;Dtl;Klhl13;Klhl31;Klhl41;March1;Naip6;Nlrc4;Spsb1;Spsb4;Traip;Trim30c;Ube2c;Ube2t;Uhrf1
GO:0004843	thiol-dependent ubiquitin-specific protease activity	molecular_function	catalytic activity	1	1755	73	19037	0.999154	1	0.148593	Zc3h12a
GO:0004854	xanthine dehydrogenase activity	molecular_function	catalytic activity	1	1755	5	19037	0.38347	0.688406	2.16946	Aox2
GO:0004857	enzyme inhibitor activity	molecular_function	enzyme regulator activity	4	1755	32	19037	0.340817	0.688406	1.35591	Angptl4;Calu;Cd55;Scg5
GO:0004860	protein kinase inhibitor activity	molecular_function	enzyme regulator activity	6	1755	53	19037	0.362864	0.688406	1.228	Bgn;Lrrc15;Podnl1;Rtn4rl2;Socs3;Trib3
GO:0004861	cyclin-dependent protein serine/threonine kinase inhibitor activity	molecular_function	enzyme regulator activity	1	1755	11	19037	0.654997	0.810409	0.986118	Cdkn2b
GO:0004862	cAMP-dependent protein kinase inhibitor activity	molecular_function	enzyme regulator activity	1	1755	8	19037	0.53879	0.748901	1.35591	Pkib
GO:0004866	endopeptidase inhibitor activity	molecular_function	enzyme regulator activity	5	1755	26	19037	0.0854528	0.320806	2.08602	A2ml1;C3;Cd109;Fetub;LOC103689965
GO:0004867	serine-type endopeptidase inhibitor activity	molecular_function	enzyme regulator activity	13	1755	100	19037	0.129518	0.394341	1.41015	Serpina3n;Serpinb10;Serpinb11;Serpinb2;Serpinb3a;Serpinb9;Serpine1;Serpinh1;Slpi;Spink5;Tfpi2;Wfdc1;Wfdc15b
GO:0004869	cysteine-type endopeptidase inhibitor activity	molecular_function	enzyme regulator activity	5	1755	40	19037	0.307144	0.662502	1.35591	Birc5;Cst6;Fetub;Pttg1;Stfa2l2
GO:0004871	signal transducer activity	molecular_function	NA	27	1755	218	19037	0.0701761	0.280328	1.34347	Axl;Bdnf;Cd3e;Csf1r;Cxcr2;Ephb2;Gja1;Gnb4;Gng13;Gng4;Gngt2;Il1r1;Insrr;Litaf;Met;Ngf;Pdgfrb;Plcb1;Rac2;Ret;Ripk3;Rnd1;Rnd3;Sectm1a;Sectm1b;Shisa3;Tmed3
GO:0004875	complement receptor activity	molecular_function	molecular transducer activity|receptor activity	3	1755	11	19037	0.0735992	0.284534	2.95835	C3ar1;C5ar1;Fpr1
GO:0004879	nuclear receptor activity	molecular_function	NA	3	1755	42	19037	0.756876	0.867085	0.774807	Nr4a1;Nr4a3;Pgr
GO:0004888	transmembrane signaling receptor activity	molecular_function	molecular transducer activity|receptor activity	18	1755	455	19037	0.999996	1	0.429124	Axl;Cd247;Cd3e;Chrna4;Csf1r;Ephb2;Fas;Glra1;Insrr;Met;Nfam1;Olr1584;Olr1587;Pdgfrb;Ret;Tlr7;Tlr9;Tnfrsf8
GO:0004890	GABA-A receptor activity	molecular_function	molecular transducer activity|receptor activity	2	1755	19	19037	0.533766	0.748901	1.14182	Gabrb3;Gabrp
GO:0004896	cytokine receptor activity	molecular_function	molecular transducer activity|receptor activity	12	1755	31	19037	9.6707e-06	0.000453099	4.19895	Cd44;Cd74;Csf2rb;Csf3r;Cx3cr1;F3;Il20ra;Il21r;Il22ra1;Il2rb;Il2rg;Osmr
GO:0004908	interleukin-1 receptor activity	molecular_function	molecular transducer activity|receptor activity	4	1755	5	19037	0.00033353	0.00697162	8.67783	Il1r1;Il1r2;Il1rl1;Il1rl2
GO:0004930	G-protein coupled receptor activity	molecular_function	molecular transducer activity|receptor activity	44	1755	1572	19037	1	1	0.303614	Adgre1;Adgre4;Adgrg5;Adgrl2;Aplnr;C3ar1;C5ar1;Cmklr1;Cnr2;Drd1;Ednrb;F2r;F2rl1;F2rl2;Ffar2;Ffar4;Fpr1;Gpbar1;Gpr141;Gpr15;Gpr153;Gpr176;Gpr183;Gpr3;Gpr34;Gpr65;Gpr88;Gprc5a;Grpr;Htr2a;Htr7;Mrgpre;Mrgprx3;Niacr1;Olr1587;Olr59;Olr63;Prokr1;Prokr2;Ptgfr;Ptgir;Sfrp1;Sfrp4;Tsku
GO:0004931	extracellularly ATP-gated cation channel activity	molecular_function	molecular transducer activity|receptor activity|transporter activity	2	1755	7	19037	0.130648	0.394341	3.09923	P2rx4;P2rx5
GO:0004935	adrenergic receptor activity	molecular_function	molecular transducer activity|receptor activity	2	1755	18	19037	0.5042	0.743341	1.20525	Adra1d;Adra2b
GO:0004950	chemokine receptor activity	molecular_function	molecular transducer activity|receptor activity	3	1755	8	19037	0.0307483	0.178239	4.06774	Ccr3;Cxcr2;Cxcr4
GO:0004952	dopamine neurotransmitter receptor activity	molecular_function	molecular transducer activity|receptor activity	1	1755	5	19037	0.38347	0.688406	2.16946	Drd1
GO:0004966	galanin receptor activity	molecular_function	molecular transducer activity|receptor activity	4	1755	11	19037	0.0139929	0.10432	3.94447	Cysltr2;Gpr84;Ltb4r;Ltb4r2
GO:0004970	ionotropic glutamate receptor activity	molecular_function	molecular transducer activity|receptor activity|transporter activity	2	1755	17	19037	0.473442	0.73204	1.27615	Gria3;Grid2
GO:0004982	N-formyl peptide receptor activity	molecular_function	molecular transducer activity|receptor activity	1	1755	6	19037	0.440322	0.704458	1.80788	Fpr1
GO:0004983	neuropeptide Y receptor activity	molecular_function	molecular transducer activity|receptor activity	2	1755	9	19037	0.198499	0.505521	2.41051	Gpr83;Prokr2
GO:0004984	olfactory receptor activity	molecular_function	molecular transducer activity|receptor activity	4	1755	1382	19037	1	1	0.0313959	Olr1584;Olr1587;Olr59;Olr63
GO:0004993	G-protein coupled serotonin receptor activity	molecular_function	molecular transducer activity|receptor activity	2	1755	29	19037	0.761495	0.867375	0.748089	Htr2a;Htr7
GO:0005001	transmembrane receptor protein tyrosine phosphatase activity	molecular_function	catalytic activity|molecular transducer activity|receptor activity	2	1755	5	19037	0.070352	0.280328	4.33892	Ptpn6;Ptprc
GO:0005003	ephrin receptor activity	molecular_function	catalytic activity|molecular transducer activity|receptor activity	1	1755	9	19037	0.581326	0.772752	1.20525	Ephb2
GO:0005005	transmembrane-ephrin receptor activity	molecular_function	catalytic activity|molecular transducer activity|receptor activity	1	1755	14	19037	0.741937	0.853711	0.774807	Ephb2
GO:0005024	transforming growth factor beta-activated receptor activity	molecular_function	catalytic activity|molecular transducer activity|receptor activity	1	1755	5	19037	0.38347	0.688406	2.16946	Eng
GO:0005025	transforming growth factor beta receptor activity, type I	molecular_function	catalytic activity|molecular transducer activity|receptor activity	1	1755	5	19037	0.38347	0.688406	2.16946	Bmpr1b
GO:0005031	tumor necrosis factor-activated receptor activity	molecular_function	molecular transducer activity|receptor activity	9	1755	20	19037	3.08587e-05	0.00116203	4.88128	Cd40;Fas;Relt;Tnfrsf10b;Tnfrsf11b;Tnfrsf18;Tnfrsf1b;Tnfrsf8;Tnfrsf9
GO:0005041	low-density lipoprotein particle receptor activity	molecular_function	molecular transducer activity|receptor activity|transporter activity	3	1755	9	19037	0.043019	0.217503	3.61576	Ldlr;Olr1;Tnfaip6
GO:0005042	netrin receptor activity	molecular_function	molecular transducer activity|receptor activity	1	1755	6	19037	0.440322	0.704458	1.80788	Unc5a
GO:0005044	scavenger receptor activity	molecular_function	molecular transducer activity|receptor activity|transporter activity	12	1755	50	19037	0.00159893	0.0231306	2.60335	Cfi;Crb2;Enpp3;Fcrl2;Hhipl1;Lgals3bp;Loxl2;Loxl4;Msr1;Prg4;Prss12;Ssc5d
GO:0005049	nuclear export signal receptor activity	molecular_function	transporter activity	1	1755	9	19037	0.581326	0.772752	1.20525	Ran
GO:0005057	signal transducer activity, downstream of receptor	molecular_function	NA	5	1755	18	19037	0.0204591	0.134142	3.01314	Fcar;Ngf;Rgs14;Traip;Tyrobp
GO:0005068	transmembrane receptor protein tyrosine kinase adaptor activity	molecular_function	binding	2	1755	8	19037	0.163948	0.448809	2.71182	Sh2b2;Stap1
GO:0005070	SH3/SH2 adaptor activity	molecular_function	binding	7	1755	28	19037	0.0117231	0.0954289	2.71182	Fcrl2;Grb14;Hsh2d;Sh2b2;Sh2d2a;Sla;Stap1
GO:0005080	protein kinase C binding	molecular_function	binding	5	1755	58	19037	0.629086	0.800228	0.935112	Adam9;Itgav;Pdlim5;Plek;Top2a
GO:0005085	guanyl-nucleotide exchange factor activity	molecular_function	binding	1	1755	80	19037	0.999571	1	0.135591	Vav1
GO:0005086	ARF guanyl-nucleotide exchange factor activity	molecular_function	binding	3	1755	19	19037	0.252891	0.592923	1.71273	Cyth4;Ncf4;Sec61b
GO:0005088	Ras guanyl-nucleotide exchange factor activity	molecular_function	binding	2	1755	13	19037	0.340143	0.688406	1.66881	Rasgrf1;Rasgrp4
GO:0005089	Rho guanyl-nucleotide exchange factor activity	molecular_function	binding	7	1755	64	19037	0.376677	0.688406	1.18642	Arhgef39;Ect2;Fgd2;Fgd3;Plekhg4;Rasgrf1;Vav1
GO:0005092	GDP-dissociation inhibitor activity	molecular_function	enzyme regulator activity	1	1755	8	19037	0.53879	0.748901	1.35591	Rgs14
GO:0005095	GTPase inhibitor activity	molecular_function	enzyme regulator activity	1	1755	5	19037	0.38347	0.688406	2.16946	Slit2
GO:0005096	GTPase activator activity	molecular_function	enzyme regulator activity	21	1755	224	19037	0.501548	0.743341	1.01693	Adprhl1;Arhgap15;Arhgap19;Arhgap25;Arhgap30;Arhgap9;Cdc42ep1;Dock2;Ect2;Elmod1;Nckap1l;Plcb1;Racgap1;Rasgrf1;Rgs14;Rgs16;Rgs18;Rgs19;Rgs4;Rgs8;Thy1
GO:0005102	signaling receptor binding	molecular_function	binding	67	1755	397	19037	8.35146e-07	5.72191e-05	1.83065	Bank1;Btk;Btn2a2;Btnl9;Cd2;Cfl1;Cnpy4;Cxadr;Dpp4;Drd1;Edn1;Ephb2;Ermap;F2r;Fes;Fgg;Fgr;Fn1;Fyb;Gdf5;Gja1;Grap;Grip1;Hck;Hcst;Idh1;Il17ra;Il6;Inhba;Itgav;Itgb1;Jak3;Lbp;Lck;Lgals9;Lif;Lilrb3a;Lyn;Matk;Mog;Msn;Ncr3;Nos2;Nrg1;Nxph1;Nxph4;P2rx4;Pdgfrb;Pgr;Plat;Plaur;PVR;Reg1a;Ren;Rnd1;Rspo1;RT1-N3;Serpine1;Sla;Slc39a1;Srpx2;Syk;Tg;Tgfb2;Tyrobp;Vtcn1;Wnt9b
GO:0005104	fibroblast growth factor receptor binding	molecular_function	binding	3	1755	27	19037	0.45951	0.728862	1.20525	Fgf18;Fgf9;Ncam1
GO:0005105	type 1 fibroblast growth factor receptor binding	molecular_function	binding	1	1755	6	19037	0.440322	0.704458	1.80788	Fgf18
GO:0005109	frizzled binding	molecular_function	binding	3	1755	38	19037	0.693421	0.830859	0.856365	Cthrc1;Sfrp1;Wnt9b
GO:0005111	type 2 fibroblast growth factor receptor binding	molecular_function	binding	1	1755	5	19037	0.38347	0.688406	2.16946	Fgf18
GO:0005112	Notch binding	molecular_function	binding	2	1755	24	19037	0.662814	0.815174	0.903941	Chac1;Nov
GO:0005113	patched binding	molecular_function	binding	1	1755	7	19037	0.491934	0.73204	1.54961	Ccnb1
GO:0005114	type II transforming growth factor beta receptor binding	molecular_function	binding	5	1755	7	19037	0.000118632	0.00323323	7.74807	Cd44;Eng;Tgfb1;Tgfb2;Tgfb3
GO:0005125	cytokine activity	molecular_function	binding|receptor regulator activity	33	1755	146	19037	9.86842e-07	6.3222e-05	2.45179	Areg;Bmp3;Ccl2;Crlf1;Cxcl10;Edn1;Gdf15;Gdf5;Gdf6;Grem1;Il10;Il11;Il17b;Il17f;Il18;Il1a;Il1b;Il1f10;Il36b;Il6;Inhba;Inhbb;Lif;Retnlg;Scg2;Sectm1a;Sectm1b;Spp1;Tgfb1;Tgfb2;Tgfb3;Timp1;Tnfrsf11b
GO:0005126	cytokine receptor binding	molecular_function	binding	1	1755	9	19037	0.581326	0.772752	1.20525	Il17f
GO:0005127	ciliary neurotrophic factor receptor binding	molecular_function	binding	1	1755	6	19037	0.440322	0.704458	1.80788	Crlf1
GO:0005138	interleukin-6 receptor binding	molecular_function	binding	1	1755	7	19037	0.491934	0.73204	1.54961	Il6
GO:0005149	interleukin-1 receptor binding	molecular_function	binding	5	1755	17	19037	0.0159617	0.114947	3.19038	Il1a;Il1b;Il1f10;Il36b;Tlr9
GO:0005154	epidermal growth factor receptor binding	molecular_function	binding	7	1755	35	19037	0.0379202	0.206925	2.16946	Areg;Arf4;Cd44;Epgn;Ereg;Hbegf;Itga5
GO:0005158	insulin receptor binding	molecular_function	binding	1	1755	25	19037	0.911041	0.953365	0.433892	Igf1
GO:0005159	insulin-like growth factor receptor binding	molecular_function	binding	2	1755	15	19037	0.408624	0.704458	1.44631	Igf1;Ren
GO:0005160	transforming growth factor beta receptor binding	molecular_function	binding	10	1755	43	19037	0.00488452	0.052725	2.52263	Bmp3;Gdf15;Gdf5;Gdf6;Inhba;Inhbb;Rasl11b;Tgfb1;Tgfb2;Tgfb3
GO:0005161	platelet-derived growth factor receptor binding	molecular_function	binding	4	1755	15	19037	0.0430333	0.217503	2.89261	Figf;Il1r1;Lyn;Pdgfrb
GO:0005164	tumor necrosis factor receptor binding	molecular_function	binding	2	1755	33	19037	0.821412	0.899354	0.657412	Nucb2;Tnfsf8
GO:0005178	integrin binding	molecular_function	binding	37	1755	111	19037	1.4834e-12	4.87842e-10	3.61576	Actn1;Adam9;Calr;Col16a1;Col3a1;Ctgf;Cxadr;Cyr61;Esm1;Fap;Fbn1;Fermt3;Fn1;Gpnmb;Icam1;Igf1;Il1b;Itga2;Itga5;Itgav;Itgb1;Jaml;Lamb1;Lcp1;Lyn;Mfge8;Nov;Nrg1;P4hb;Syk;Thbs1;Thbs4;Thy1;Tnn;Vwf;Wisp1;Wisp2
GO:0005179	hormone activity	molecular_function	binding|receptor regulator activity	10	1755	111	19037	0.578615	0.772752	0.977234	Apln;Edn1;Igf1;Inhba;Inhbb;Pthlh;Retnlg;Stc2;Tg;Vgf
GO:0005184	neuropeptide hormone activity	molecular_function	binding|receptor regulator activity	2	1755	27	19037	0.725443	0.846608	0.803503	Penk;Vgf
GO:0005198	structural molecule activity	molecular_function	NA	24	1755	181	19037	0.0445641	0.223864	1.43832	Add2;Anxa1;Cav3;Cldn15;Cldn2;Col15a1;Col18a1;Des;Fgg;Ivl;Kb15;Krt14;Krt17;Krt5;Krt71;Krt77;Krt81;Krt86;Lmnb1;Lmnb2;LOC100362023;RGD1305207;Sync;Vim
GO:0005200	structural constituent of cytoskeleton	molecular_function	structural molecule activity	14	1755	73	19037	0.00627262	0.0621893	2.0803	Add2;Arpc1b;Krt17;Krt76;LOC100909441;Ndc80;Tuba1a;Tuba1b;Tubb1;Tubb2a;Tubb2b;Tubb3;Tubb5;Vim
GO:0005201	extracellular matrix structural constituent	molecular_function	structural molecule activity	21	1755	46	19037	1.16336e-10	2.73279e-08	4.95203	Acan;Col11a1;Col12a1;Col1a1;Col1a2;Col3a1;Col4a1;Col4a2;Col5a1;Col5a2;Eln;Fbn1;Fbn2;Fn1;Hapln3;Lamb1;Lamc1;Mgp;NEWGENE_621351;Pxdn;Vcan
GO:0005212	structural constituent of eye lens	molecular_function	structural molecule activity	2	1755	21	19037	0.589171	0.779191	1.03308	Cryab;Vim
GO:0005215	transporter activity	molecular_function	NA	7	1755	66	19037	0.407808	0.704458	1.15047	Abcb1b;Pctp;Slc13a5;Slc16a12;Slc16a14;Slc16a3;Slc6a2
GO:0005216	ion channel activity	molecular_function	transporter activity	6	1755	35	19037	0.0981706	0.333151	1.85954	Chrna4;Fxyd5;Fxyd6;Mcub;Trpm8;Trpv2
GO:0005225	volume-sensitive anion channel activity	molecular_function	transporter activity	2	1755	8	19037	0.163948	0.448809	2.71182	Lrr1;Lrrc8c
GO:0005227	calcium activated cation channel activity	molecular_function	transporter activity	1	1755	14	19037	0.741937	0.853711	0.774807	Trpm5
GO:0005229	intracellular calcium activated chloride channel activity	molecular_function	transporter activity	9	1755	20	19037	3.08587e-05	0.00116203	4.88128	Ano4;Ano7;Clca1;Clca2;Clca4;Clca4l;Clca5;Ttyh2;Ttyh3
GO:0005230	extracellular ligand-gated ion channel activity	molecular_function	molecular transducer activity|receptor activity|transporter activity	4	1755	43	19037	0.568921	0.772752	1.00905	Chrna4;Gabrb3;Gabrp;Glra1
GO:0005234	extracellularly glutamate-gated ion channel activity	molecular_function	molecular transducer activity|receptor activity|transporter activity	2	1755	18	19037	0.5042	0.743341	1.20525	Gria3;Grid2
GO:0005242	inward rectifier potassium channel activity	molecular_function	molecular transducer activity|receptor activity|transporter activity	2	1755	20	19037	0.562097	0.772752	1.08473	Kcnj16;Kcnj2
GO:0005243	gap junction channel activity	molecular_function	transporter activity	4	1755	12	19037	0.0194817	0.134142	3.61576	Gja1;Gja5;Gjb1;Gjb2
GO:0005244	voltage-gated ion channel activity	molecular_function	transporter activity	5	1755	40	19037	0.307144	0.662502	1.35591	Clic4;Kcnk12;Scn3b;Scn5a;Tmem37
GO:0005245	voltage-gated calcium channel activity	molecular_function	transporter activity	1	1755	44	19037	0.985887	0.999668	0.246529	Itgav
GO:0005246	calcium channel regulator activity	molecular_function	channel regulator activity	2	1755	27	19037	0.725443	0.846608	0.803503	Cav3;Nrxn3
GO:0005247	voltage-gated chloride channel activity	molecular_function	transporter activity	1	1755	12	19037	0.686821	0.824954	0.903941	Clic1
GO:0005248	voltage-gated sodium channel activity	molecular_function	transporter activity	1	1755	23	19037	0.892028	0.93985	0.471621	Scn5a
GO:0005249	voltage-gated potassium channel activity	molecular_function	transporter activity	7	1755	75	19037	0.54438	0.756245	1.01241	Kcna3;Kcna6;Kcna7;Kcnab2;Kcnd1;Kcne4;Kcng2
GO:0005251	delayed rectifier potassium channel activity	molecular_function	transporter activity	3	1755	26	19037	0.434498	0.704458	1.25161	Kcna3;Kcna6;Kcna7
GO:0005254	chloride channel activity	molecular_function	transporter activity	11	1755	56	19037	0.0121685	0.096654	2.13072	Cftr;Clca5;Clic1;Clic4;Gabrb3;Gabrp;Glra1;Slc1a4;Slc26a9;Ttyh2;Ttyh3
GO:0005261	cation channel activity	molecular_function	transporter activity	6	1755	63	19037	0.529684	0.748901	1.03308	Piezo1;Piezo2;Scn5a;Trpm2;Trpm6;Trpv2
GO:0005262	calcium channel activity	molecular_function	transporter activity	5	1755	53	19037	0.547207	0.759531	1.02333	Mcub;Pkd1l1;Tmem37;Trpm8;Trpv2
GO:0005267	potassium channel activity	molecular_function	transporter activity	1	1755	37	19037	0.972184	0.991684	0.29317	Trpm5
GO:0005272	sodium channel activity	molecular_function	transporter activity	3	1755	12	19037	0.0916384	0.330931	2.71182	Scnn1a;Trpm2;Trpm5
GO:0005313	L-glutamate transmembrane transporter activity	molecular_function	transporter activity	1	1755	14	19037	0.741937	0.853711	0.774807	Slc17a6
GO:0005319	lipid transporter activity	molecular_function	transporter activity	1	1755	16	19037	0.787358	0.877748	0.677956	Apoc3
GO:0005326	neurotransmitter transporter activity	molecular_function	transporter activity	1	1755	6	19037	0.440322	0.704458	1.80788	Slc17a6
GO:0005328	neurotransmitter:sodium symporter activity	molecular_function	transporter activity	2	1755	14	19037	0.37477	0.688406	1.54961	Slc6a2;Slc6a20
GO:0005344	oxygen carrier activity	molecular_function	transporter activity	3	1755	14	19037	0.13238	0.394341	2.32442	Cygb;Hbb;LOC689064
GO:0005355	glucose transmembrane transporter activity	molecular_function	transporter activity	2	1755	20	19037	0.562097	0.772752	1.08473	Slc2a1;Slc2a5
GO:0005385	zinc ion transmembrane transporter activity	molecular_function	transporter activity	4	1755	23	19037	0.156633	0.447406	1.88649	Slc39a1;Slc39a13;Slc39a14;Slc39a8
GO:0005391	sodium:potassium-exchanging ATPase activity	molecular_function	catalytic activity|transporter activity	2	1755	13	19037	0.340143	0.688406	1.66881	Atp1a3;Atp1b1
GO:0005412	glucose:sodium symporter activity	molecular_function	transporter activity	1	1755	8	19037	0.53879	0.748901	1.35591	RGD1563815
GO:0005452	inorganic anion exchanger activity	molecular_function	transporter activity	3	1755	29	19037	0.508008	0.747392	1.12213	Slc4a1;Slc4a5;Slc4a8
GO:0005484	SNAP receptor activity	molecular_function	binding	1	1755	38	19037	0.974754	0.993278	0.285455	Ykt6
GO:0005496	steroid binding	molecular_function	binding	4	1755	47	19037	0.640526	0.808318	0.923174	Gstm1;Igf1;Pgr;Scgb2a2
GO:0005499	vitamin D binding	molecular_function	binding	1	1755	5	19037	0.38347	0.688406	2.16946	S100g
GO:0005504	fatty acid binding	molecular_function	binding	5	1755	27	19037	0.0973013	0.333151	2.00876	Fabp4;Fabp5;Ffar4;Nme2;Pmp2
GO:0005506	iron ion binding	molecular_function	binding	22	1755	184	19037	0.12445	0.394341	1.29696	Alox15;Aox2;Calr;Ch25h;Cygb;Cyp11b2;Cyp1b1;Cyp27b1;Cyp2d1;Cyp51;Hbb;Lcn2;LOC100361492;LOC689064;Nos2;P3h1;P4ha3;Plod2;Plod3;Ppef1;Ptgis;Tph1
GO:0005507	copper ion binding	molecular_function	binding	10	1755	55	19037	0.0272576	0.168498	1.97224	Aoc1;F5;Il1a;Lacc1;Lox;Loxl1;Loxl2;Loxl4;P2rx4;Prnd
GO:0005509	calcium ion binding	molecular_function	binding	88	1755	635	19037	6.76072e-05	0.00219412	1.50325	Acan;Actn1;Actn2;Adam8;Adgre1;Adgre4;Aif1;Anxa1;Anxa2;Aoc1;Calr;Calu;Cdh11;Cdh24;Cdhr1;Cgref1;Cracr2a;Crb2;Dsc3;Dsg3;E2f1;Edem1;Efcab11;Efemp2;Ehd3;F10;Fam20c;Fbln2;Fbn1;Fbn2;Fkbp10;Fstl1;Gch1;Hist1h1d;Hmcn1;Hpcal1;Lcp1;Ldlr;LOC100911486;Lrp8;Ltbp2;Masp1;Matn3;Megf6;Melk;Mgp;Mmp8;Myl1;Myl12a;Myl4;Nid1;Nucb2;Ocm2;Oit3;Padi3;Padi4;Pdia6;Pla2g2d;Plcb1;Pls3;Ppef1;Rasgrp4;Rcn1;Rcn2;Rcn3;Ret;S100a11;S1…
GO:0005515	protein binding	molecular_function	NA	173	1755	1678	19037	0.0593896	0.272023	1.11834	Abcb1b;Abcb4;Actn1;Actn2;Adcy2;Adora1;Adora2a;Amph;Ankrd1;Aplp1;Apobec1;Atp1a3;Bak1;Brca1;C2;C3;Calr;Camk2b;Car2;Casp12;Cav3;Ccna2;Ccne1;Ccr5;Cd14;Cd2;Cd44;Cdc20;Cdc25c;Cdc6;Cdk1;Cfl1;Cftr;Chek1;Chrna4;Cit;Clic4;Clip2;Col1a1;Cryab;Ctla4;Ctrb1;Cybb;Dbi;Dbn1;Drd1;Dynlt1;E2f1;Enah;Eno1;Erc2;Erp29;F2rl1;Fabp4;Fas;Fcgr1a;Fgr;Fn1;Fscn1;Fst;Gabrb3;Gch1;Gja1;Gjb2;Grb14;Grem1;Gria3;Grid2;Grip1;Hk3;Hmox1;H…
GO:0005516	calmodulin binding	molecular_function	binding	19	1755	166	19037	0.191705	0.505521	1.24156	Add2;Aspm;Basp1;Camk2b;Cnn1;Cnn2;Cth;Fas;Gap43;Iqgap3;Myh10;Myh3;Myh4;Myo10;Myo7a;Nos2;Plcb1;Scn5a;Sphk1
GO:0005518	collagen binding	molecular_function	binding	19	1755	62	19037	1.72245e-06	0.000100231	3.32417	Adam9;Ccbe1;Coch;Ctsk;Ctss;Dpp4;Gp6;Itga2;Itgb1;Lrrc15;Nid1;Pak1;Pcolce;Serpinh1;Sparc;Srgn;Thbs4;Tll1;Vwf
GO:0005520	insulin-like growth factor binding	molecular_function	binding	10	1755	23	19037	1.60659e-05	0.000692556	4.71621	Ctgf;Cyr61;Esm1;Htra1;Igfbp2;Igfbp4;Insrr;Nov;Wisp1;Wisp2
GO:0005521	lamin binding	molecular_function	binding	1	1755	18	19037	0.824788	0.899354	0.602627	Plcb1
GO:0005522	profilin binding	molecular_function	binding	3	1755	11	19037	0.0735992	0.284534	2.95835	Dbn1;Enah;Fmnl1
GO:0005524	ATP binding	molecular_function	binding	144	1755	1365	19037	0.0450622	0.225677	1.14433	Abca17;Abcb1b;Abcb4;Abcc4;Acta1;Actg2;Adcy2;Adcy7;Aldh18a1;Alpk3;Atp1a3;Atp1b1;Aurka;Aurkb;Axl;Bmpr1b;Brip1;Btk;Bub1;Bub1b;Camk2b;Cdc7;Cdk1;Cenpe;Cftr;Chek1;Chtf18;Ciita;Cit;Ckmt1b;Ckmt2;Csf1r;Ddx43;Dhx58;Ehd3;Entpd8;Ephb2;Ercc6l;Ern2;Fes;Fgr;Fignl1;Gars;Gsg2;Hck;Hells;Hist1h1d;Hk3;Insrr;Jak3;Kif11;Kif14;Kif15;Kif18a;Kif18b;Kif20a;Kif20b;Kif22;Kif23;Kif2c;Kif4a;Kif5c;Kifc1;Lck;LOC100912399;Lyn;Ma…
GO:0005525	GTP binding	molecular_function	binding	34	1755	360	19037	0.467558	0.73204	1.02447	Arf2;Arf4;Arl11;Arl5c;Ehd3;Fkbp11;Gbp2;Gch1;Hist1h1d;Ifi47;Irgc;LOC100909441;Mpa2l;Mx1;Niacr1;P2rx5;Rab13;Rab32;Rac2;Ran;Rasl11b;RGD1559575;Rnd1;Rnd3;Rras2;Sept11;Sept5;Tuba1a;Tuba1b;Tubb1;Tubb2a;Tubb2b;Tubb3;Tubb5
GO:0005528	FK506 binding	molecular_function	binding	1	1755	12	19037	0.686821	0.824954	0.903941	Fkbp10
GO:0005534	galactose binding	molecular_function	binding	1	1755	6	19037	0.440322	0.704458	1.80788	Eng
GO:0005536	glucose binding	molecular_function	binding	2	1755	12	19037	0.304935	0.660045	1.80788	G6pd;Hk3
GO:0005537	mannose binding	molecular_function	binding	1	1755	22	19037	0.88105	0.932065	0.493059	Colec10
GO:0005539	glycosaminoglycan binding	molecular_function	binding	4	1755	22	19037	0.138926	0.40793	1.97224	Bgn;Ccdc80;Eng;Ndnf
GO:0005540	hyaluronic acid binding	molecular_function	binding	8	1755	24	19037	0.000980479	0.0159627	3.61576	Acan;Cd44;Cemip;Hapln3;Hmmr;Layn;Tnfaip6;Vcan
GO:0005542	folic acid binding	molecular_function	binding	4	1755	13	19037	0.0261266	0.162116	3.33763	Dhfr;Folr2;Ftcd;Tyms
GO:0005543	phospholipid binding	molecular_function	binding	12	1755	98	19037	0.190297	0.50524	1.32824	Amph;Anxa1;Apoc3;Bin2;F10;F3;Map1b;Pla2g7;Prex1;Ptafr;Sec61g;Trem2
GO:0005544	calcium-dependent phospholipid binding	molecular_function	binding	5	1755	53	19037	0.547207	0.759531	1.02333	Anxa1;Anxa2;Syt10;Syt12;Syt13
GO:0005545	1-phosphatidylinositol binding	molecular_function	binding	2	1755	15	19037	0.408624	0.704458	1.44631	Picalm;Snap91
GO:0005546	phosphatidylinositol-4,5-bisphosphate binding	molecular_function	binding	12	1755	74	19037	0.0374344	0.205639	1.75902	Actn2;Alox15;Anxa2;Gsdmc;Gsdmd;Hip1;Kcnj2;Myo1g;Picalm;Plcb1;Snap91;Syt10
GO:0005547	phosphatidylinositol-3,4,5-trisphosphate binding	molecular_function	binding	5	1755	40	19037	0.307144	0.662502	1.35591	Arhgap9;Btk;Myo10;Myo1g;Racgap1
GO:0005548	phospholipid transporter activity	molecular_function	transporter activity	1	1755	13	19037	0.715711	0.839021	0.834407	Mfsd2a
GO:0005575	cellular_component	cellular_component	NA	197	1755	2094	19037	0.387984	0.694962	1.0205	Acta1;Actg2;Adam12;Adam19;Adam8;Adamts12;Ahsp;Aim1;Aim2;Angpt4;Ankh;Apol2;Arf4;Arl4c;Arntl2;Aspm;Bank1;Bcl2a1;Bst1;Btg3;Bub1;Bub1b;C1qa;C1qc;C2;Card11;Ccl12;Ccl17;Ccl22;Ccna2;Cd3e;Cdc6;Cdc7;Cdh24;Cdhr1;Cebpe;Ces2h;Cfp;Chek1;Chsy1;Ciita;Cilp;Cks2;Coch;Col4a1;Col4a2;Col6a2;Col6a3;Col7a1;Coro1a;Crlf1;Csf1r;Csf2ra;Csf2rb;Csf3r;Cth;Ctla4;Cxcl9;Cxcr2;Cysltr2;Dhfr;Dio3;Epgn;Ephb2;Esco2;Exo1;Ext1;Fancd2;…
GO:0005576	extracellular region	cellular_component	NA	128	1755	669	19037	6.12467e-16	2.74664e-13	2.07542	Adamtsl2;Adh7;Angptl4;Anxa2;Apln;Apol2;Apold1;Arsi;Bdnf;Bgn;Bmper;C1qtnf3;Calu;Ccl2;Cd2;Cgref1;Chi3l1;Chsy1;Cma1;Coch;Col12a1;Col18a1;Col1a1;Col1a2;Col3a1;Col4a1;Col4a2;Col5a1;Col6a2;Col6a3;Cpa3;Ctgf;Cthrc1;Ctss;Cxcl10;Cxcl13;Dsc3;Eln;Esm1;F10;F5;Fas;Fbln2;Fbn1;Fbn2;Fcer1a;Fcnb;Fetub;Fgf18;Fgfbp1;Figf;Fn1;Fndc1;Gdnf;Gstm1;Hmcn1;Hspg2;Ifi30;Igfbp2;Il17b;Il1b;Il1r2;Inhba;Lcn2;Lgals1;Lgals3bp;Litaf;…
GO:0005577	fibrinogen complex	cellular_component	extracellular region|extracellular region part|macromolecular complex	3	1755	7	19037	0.0206121	0.134142	4.64884	Fgg;Fn1;Thbs1
GO:0005578	proteinaceous extracellular matrix	cellular_component	NA	70	1755	243	19037	1.53789e-18	8.42932e-16	3.12473	Acan;Adamts1;Adamts4;Adamts8;Adamts9;Adamtsl2;Angptl4;Bgn;Ccbe1;Ccdc80;Coch;Col11a1;Col1a1;Col3a1;Col5a1;Col6a2;Col6a3;Cpz;Ctgf;Cthrc1;Cyr61;Eln;Emilin1;Fbn1;Fbn2;Fn1;Gldn;Gpc4;Hapln3;Hspg2;Il1rl1;Lamb1;Lamc1;Lgals1;Lgals3bp;Lox;Loxl1;Ltbp2;Matn3;Mfap5;Mmp10;Mmp2;Mmp7;Mmp8;Mmp9;Ndnf;Nid1;Nov;Olfml2b;Postn;Sfrp1;Slit2;Slit3;Sparc;Spon1;Tgfb1;Tgfb3;Thbs2;Thbs4;Timp1;Tlr9;Tnc;Tnfrsf11b;Tnn;Vcan;Vwa1…
GO:0005581	collagen trimer	cellular_component	macromolecular complex	22	1755	53	19037	4.08066e-10	7.18925e-08	4.50265	C1qa;C1qb;C1qc;C1qtnf3;C1qtnf6;Col11a1;Col15a1;Col1a1;Col1a2;Col3a1;Col5a1;Col5a2;Col6a2;Col6a3;Col8a1;Col8a2;Colec10;Cthrc1;Emilin1;Fcnb;Gldn;Lox
GO:0005587	collagen type IV trimer	cellular_component	extracellular matrix|extracellular matrix part|extracellular region|extracellular region part|macromolecular complex	2	1755	6	19037	0.0992091	0.333151	3.61576	Col4a1;Col4a2
GO:0005604	basement membrane	cellular_component	extracellular matrix|extracellular matrix part|extracellular region|extracellular region part	31	1755	94	19037	1.29434e-10	2.77607e-08	3.5773	Acan;Adamts1;Anxa2;Ccdc80;Col15a1;Col18a1;Col4a1;Col4a2;Col5a1;Col7a1;Fbn1;Fgf9;Fn1;Frem1;Hmcn1;Hspg2;Itgb1;Lamb1;Lamc1;Loxl1;Loxl2;Nid1;P3h1;Sparc;Spn;Tgfb2;Thbs2;Thbs4;Timp1;Tnc;Vwa1
GO:0005605	basal lamina	cellular_component	NA	5	1755	19	19037	0.0257095	0.162116	2.85455	Fn1;Hspg2;Lamb1;Lamc1;Nid1
GO:0005614	interstitial matrix	cellular_component	extracellular matrix|extracellular region|extracellular region part	4	1755	17	19037	0.0648145	0.280328	2.5523	Ccdc80;Igf1;Tnc;Vwa1
GO:0005615	extracellular space	cellular_component	extracellular region|extracellular region part	297	1755	1300	19037	4.54159e-53	2.24037e-49	2.47819	A2ml1;Acan;Adam12;Adam9;Adamts20;Adamts3;Adamts4;Adamts9;Afm;Angpt4;Angptl2;Angptl4;Anxa1;Anxa2;Aoc1;Apln;Apoc3;Areg;Arg1;Axl;Bdnf;Bgn;Bmp3;Bmper;C1qa;C1qb;C1qc;C1ql4;C1qtnf3;C1qtnf6;C2;C3;C4bpa;Calr;Camp;Car2;Ccbe1;Ccdc80;Ccl12;Ccl17;Ccl2;Ccl22;Ccl5;Ccl7;Ccl9;Ccr3;Cd109;Cd14;Cd40;Cdsn;Ces2h;Cfi;Cfl1;Chi3l1;Cilp;Cma1;Col11a1;Col12a1;Col15a1;Col18a1;Col1a1;Col1a2;Col3a1;Col4a1;Col4a2;Col5a1;Col5a2…
GO:0005622	intracellular	cellular_component	cell|cell part	96	1755	880	19037	0.0456124	0.228046	1.18334	Abi3;Actn1;Adcy2;Adgb;Adh7;Adprhl1;Adra2b;Ano4;Ano7;Areg;Arl11;Arl5c;Atp1b1;Axl;Bak1;Bcl11b;Bgn;Ccr7;Clic4;Cma1;Col1a2;Csf1r;Cxcr2;Cybb;Ddx43;Defb1;Depdc1b;Ecel1;Eomes;Etv4;Fcer1a;Fkbp11;Fpr1;Gdf5;Glra1;Gmfg;Gpihbp1;Gpr65;Gstp1;Igf1;Igfbp4;Il18;Itgav;Krt14;Lax1;Ldlr;Lgals1;Lgals9;Lif;Lrrc15;Mapk10;Mefv;Mettl21b;Micall2;Milr1;Mllt11;Nfam1;Nos2;Picalm;Plek;Plek2;Plk3;Ptafr;Pthlh;Ramp3;Rasgrf1;Rasgr…
GO:0005623	cell	cellular_component	NA	20	1755	101	19037	0.000809289	0.0142579	2.14798	Amph;Ang2;Apoc3;C1qtnf3;C3ar1;Ccl12;Cxcl1;Cxcl11;Cxcl13;Cxcl2;Cxcl3;Hk3;Hmgb2;Mcph1;Milr1;Nox4;Slamf8;Spry1;Tmem178a;Txnrd1
GO:0005634	nucleus	cellular_component	cell|cell part|organelle	417	1755	4735	19037	0.87726	0.931853	0.955295	Actn1;Aif1;Aldh1a3;Aldh1l2;Alpk3;Ankle1;Ankrd1;Ano7;Anxa1;Apobec1;Apobec3b;Areg;Arg1;Arnt2;Arntl2;Aspm;Atp1a3;Aunip;Aurka;Aurkb;Bard1;Basp1;Bcl11b;Bcl3;Bcl6b;Bend6;Bhlhe40;Birc5;Bnc1;Brca1;Brip1;Brms1;Btg3;Btk;Calr;Camk2n2;Casp12;Ccna2;Ccnb1;Ccne1;Ccnf;Ccnjl;Cd33;Cd38;Cd44;Cdc20;Cdc25c;Cdc45;Cdc6;Cdc7;Cdca5;Cdca8;Cdk1;Cdkn2b;Cdkn3;Cdt1;Cebpd;Cebpe;Cenpa;Cenpe;Cenpf;Cenph;Cenpi;Cenpk;Cenpn;Cenpq;C…
GO:0005635	nuclear envelope	cellular_component	cell|cell part|organelle|organelle part	15	1755	160	19037	0.512648	0.748901	1.01693	Calr;Cenpf;Clic1;Cybb;Htatip2;Lmnb1;Lmnb2;Lrrc59;Mns1;Nav3;Oit3;Rac2;Ran;Rrm1;Rrm2
GO:0005637	nuclear inner membrane	cellular_component	cell|cell part|membrane|organelle|organelle part	1	1755	39	19037	0.977086	0.995038	0.278136	Lmnb1
GO:0005638	lamin filament	cellular_component	cell|cell part|membrane-enclosed lumen|organelle|organelle part	2	1755	5	19037	0.070352	0.280328	4.33892	Lmnb1;Lmnb2
GO:0005639	integral component of nuclear inner membrane	cellular_component	cell|cell part|membrane|membrane part|organelle|organelle part	3	1755	17	19037	0.202394	0.507839	1.91423	Ankle1;P2rx4;P2rx5
GO:0005640	nuclear outer membrane	cellular_component	cell|cell part|membrane|membrane part|organelle|organelle part	2	1755	22	19037	0.614978	0.789613	0.986118	Gsta2;Nucb2
GO:0005641	nuclear envelope lumen	cellular_component	cell|cell part|membrane-enclosed lumen|organelle|organelle part	1	1755	10	19037	0.619941	0.789613	1.08473	Tubb5
GO:0005643	nuclear pore	cellular_component	cell|cell part|macromolecular complex|organelle|organelle part	3	1755	53	19037	0.878034	0.932065	0.613998	Kpna2;Mad2l1;Ran
GO:0005652	nuclear lamina	cellular_component	cell|cell part|membrane-enclosed lumen|organelle|organelle part	1	1755	6	19037	0.440322	0.704458	1.80788	Lmnb1
GO:0005654	nucleoplasm	cellular_component	cell|cell part|membrane-enclosed lumen|organelle|organelle part	172	1755	2021	19037	0.886672	0.937209	0.923174	Abcb4;Adam12;Aim2;Anln;Anxa1;Apold1;Asf1b;Aurkb;Bcl3;Bnc1;Bub1;Ccna2;Ccne1;Cdc20;Cdc7;Cdca2;Cdca5;Cebpd;Cebpe;Cenpa;Cenpe;Cenpf;Cenpq;Cenpw;Chaf1b;Chek1;Chtf18;Clec7a;Clspn;Creb3l4;Csf1r;Ctsk;Cx3cr1;Cxadr;Cytip;Dntt;Dscc1;Dusp4;E2f1;Egr1;Egr2;Elmod1;Exo1;Fam114a1;Fam131b;Fanci;Fblim1;Fbxo5;Fcho1;Fdps;Fen1;Foxc2;Fstl3;Gbp2;Gch1;Gins3;Gja1;Gsdmd;H2afx;H2afy2;Hck;Hemgn;Hist1h2ail1;Hist1h2ao;Hist1h2b…
GO:0005657	replication fork	cellular_component	cell|cell part|organelle|organelle part	7	1755	26	19037	0.00766041	0.0682109	2.92043	Chek1;H2afx;LOC680663;Rad18;Rad51;Rad51c;Uhrf1
GO:0005658	alpha DNA polymerase:primase complex	cellular_component	cell|cell part|macromolecular complex|membrane-enclosed lumen|organelle|organelle part	2	1755	5	19037	0.070352	0.280328	4.33892	Pola2;Prim1
GO:0005662	DNA replication factor A complex	cellular_component	cell|cell part|macromolecular complex|membrane-enclosed lumen|organelle|organelle part	1	1755	14	19037	0.741937	0.853711	0.774807	Tonsl
GO:0005664	nuclear origin of replication recognition complex	cellular_component	cell|cell part|macromolecular complex|membrane-enclosed lumen|organelle|organelle part	2	1755	8	19037	0.163948	0.448809	2.71182	Mcm2;Orc6
GO:0005665	DNA-directed RNA polymerase II, core complex	cellular_component	cell|cell part|macromolecular complex|membrane-enclosed lumen|organelle|organelle part	1	1755	19	19037	0.840956	0.910743	0.57091	Polr2l
GO:0005667	transcription factor complex	cellular_component	cell|cell part|macromolecular complex	13	1755	221	19037	0.973506	0.992622	0.638076	Ankrd1;Arnt2;Arntl2;E2f1;E2f7;E2f8;Gata4;Hcls1;Nr4a1;Nr4a3;Rbl1;Tead4;Tp73
GO:0005680	anaphase-promoting complex	cellular_component	cell|cell part|macromolecular complex|organelle|organelle part	2	1755	19	19037	0.533766	0.748901	1.14182	Cdc20;Ube2c
GO:0005688	U6 snRNP	cellular_component	cell|cell part|macromolecular complex|organelle|organelle part	1	1755	9	19037	0.581326	0.772752	1.20525	Lsm4
GO:0005694	chromosome	cellular_component	cell|cell part|organelle	5	1755	75	19037	0.832729	0.907011	0.723153	Brca1;Cdca2;Cenpe;H2afx;Mad2l1
GO:0005719	nuclear euchromatin	cellular_component	cell|cell part|membrane-enclosed lumen|organelle|organelle part	3	1755	30	19037	0.531386	0.748901	1.08473	Hist1h1a;LOC684828;Prdx1
GO:0005720	nuclear heterochromatin	cellular_component	cell|cell part|membrane-enclosed lumen|organelle|organelle part	6	1755	28	19037	0.0392095	0.209556	2.32442	Eme1;Hist1h1b;Hist1h1d;Suv39h2;Uhrf1;Zfp57
GO:0005721	pericentric heterochromatin	cellular_component	cell|cell part|organelle|organelle part	4	1755	16	19037	0.0533197	0.254377	2.71182	Hells;Ikzf1;Incenp;Snai1
GO:0005730	nucleolus	cellular_component	cell|cell part|membrane-enclosed lumen|organelle|organelle part	57	1755	799	19037	0.98635	0.999931	0.773837	Arntl2;Cdc6;Cdca8;Cenph;Cenpw;Ddx43;Dsn1;Dtl;E2f8;Eid3;Etv4;Eya2;Fam64a;Fancd2;Fen1;Fgf18;Fkbp10;Gprc5a;Heatr1;Hist1h1d;Hjurp;Hmgb2;Hmox1;Kif20b;LOC103690068;Mcm10;Mcm2;Mcm3;Mki67;Mycn;Myo10;Ncf2;Nusap1;Oasl;Phlda1;Pkmyt1;Plk3;Plk4;Prdx1;Ptpn6;Rad51;Ran;Rbm3;Rcn2;Rexo2;Rgcc;Runx3;S100a3;Sapcd2;Smc2;Spc24;Top2a;Trib3;Tyms;Ube2t;Vmp1;Wt1
GO:0005737	cytoplasm	cellular_component	cell|cell part	482	1755	4763	19037	0.00746425	0.0676824	1.09771	Abcb4;Abi3;Acta1;Actg2;Actn1;Adam8;Adam9;Adcy2;Adgb;Adh7;Ahsp;Aif1;Aim2;Akr7a3;Aldh1a2;Aldh1a3;Alox15;Amph;Ankle1;Ankrd1;Anks1b;Anxa1;Anxa2;Apobec1;Apobec3b;Areg;Arf4;Arg1;Arhgap15;Arhgap19;Arl4c;Arnt2;Arntl2;Arpc1b;Aspm;Atp1a3;Aunip;Aurkb;Axl;Bard1;Basp1;Bcat1;Bcl3;Bdnf;Bgn;Bhlhe40;Birc5;Bnc1;Brca1;Brip1;Brms1;Btg3;Btk;Bub1b;Calr;Camk2b;Camp;Capn6;Car1;Car2;Card11;Card14;Carhsp1;Casp12;Cass4;Cav…
GO:0005739	mitochondrion	cellular_component	cell|cell part|organelle	77	1755	1276	19037	0.999993	1	0.654578	Aim2;Akr1b8;Aldh18a1;Aldh1l2;Bak1;Bcat1;Bdnf;Ccr7;Ckmt1b;Clic1;Clic4;Coq10b;Creb3l4;Cryab;Cyp11b2;Cyp1b1;Cyp27b1;Cyp2d1;Dctpp1;Dhfr;Dlgap5;Dynlt1;Echs1;Eln;Eya2;Fam72a;Fas;Fen1;Gars;Gatm;Gja1;Gsdmc;Gstp1;Heatr1;Hjurp;Hk3;Hsh2d;Idh1;Ier3;Ifit3;Irg1;Kmo;Lexm;LOC100361898;Maff;Mapk10;Mcub;MGC105649;Mmp2;Mtfr2;Mthfd2;Nipsnap3b;Nox4;Nsun4;Oas1a;Oas2;Pgr;Pmaip1;Prss35;Pycr1;Rab32;Rad51;Rad51c;Rexo2;Rip…
GO:0005741	mitochondrial outer membrane	cellular_component	cell|cell part|membrane|organelle|organelle part	7	1755	129	19037	0.959117	0.98594	0.588613	Arg1;Bak1;Bcl2a1;Gja1;Kmo;Rab32;Rsad2
GO:0005743	mitochondrial inner membrane	cellular_component	cell|cell part|membrane|organelle|organelle part	11	1755	225	19037	0.994835	1	0.530312	Chdh;Ckmt1b;Ckmt2;Coq10b;Cyp11b2;Fgr;Gatm;Rsad2;Slc9b2;Tyms;Ucp2
GO:0005747	mitochondrial respiratory chain complex I	cellular_component	cell|cell part|macromolecular complex|membrane|membrane part|organelle|organelle part	1	1755	47	19037	0.989449	1	0.230793	LOC100912599
GO:0005751	mitochondrial respiratory chain complex IV	cellular_component	cell|cell part|macromolecular complex|membrane|membrane part|organelle|organelle part	3	1755	16	19037	0.178116	0.475714	2.03387	Cox6a2;MGC105649;Ndufa4l2
GO:0005758	mitochondrial intermembrane space	cellular_component	cell|cell part|membrane-enclosed lumen|organelle|organelle part	5	1755	71	19037	0.795302	0.884207	0.763894	Fgr;Gatm;LOC100361898;Lyn;Rexo2
GO:0005759	mitochondrial matrix	cellular_component	cell|cell part|membrane-enclosed lumen|organelle|organelle part	8	1755	173	19037	0.992303	1	0.501609	Brca1;Ccnb1;Cdk1;Echs1;Fdps;Prdx1;Rexo2;Tyms
GO:0005761	mitochondrial ribosome	cellular_component	cell|cell part|macromolecular complex|membrane-enclosed lumen|organelle|organelle part	1	1755	18	19037	0.824788	0.899354	0.602627	Lexm
GO:0005762	mitochondrial large ribosomal subunit	cellular_component	cell|cell part|macromolecular complex|membrane-enclosed lumen|organelle|organelle part	2	1755	57	19037	0.972773	0.992079	0.380607	LOC100910528;Nsun4
GO:0005764	lysosome	cellular_component	cell|cell part|organelle	31	1755	259	19037	0.0797153	0.302024	1.29832	Cd74;Ctrb1;Ctsk;Ctss;Ctsz;Cxcr4;Dram1;Gja1;Hck;Ifi30;Il1b;Laptm5;Ldlr;Lgmn;March1;Napsa;Pcsk9;Plbd1;Prss16;Ramp3;RT1-Da;RT1-DMb;RT1-DOb;Shkbp1;Slc11a1;Tlr7;Tlr9;Tmem150b;Tmem97;Trpm2;Unc93b1
GO:0005765	lysosomal membrane	cellular_component	cell|cell part|membrane|organelle|organelle part	11	1755	153	19037	0.844843	0.914351	0.779871	Anxa2;Cd68;Litaf;March1;Myo7a;RT1-Da;RT1-Db1;RT1-DMb;Slc15a3;Treml4;Trpm2
GO:0005768	endosome	cellular_component	cell|cell part|organelle	24	1755	287	19037	0.722679	0.846586	0.907091	Anxa1;Anxa2;Ccr3;Ccr5;Clvs1;Cxcr4;Gja1;Gpr15;Grb14;Ldlr;March1;Picalm;Prss16;Ptprn;Rab13;Sla;Steap1;Steap4;Tfrc;Tgfb2;Tlr7;Tlr9;Unc93b1;Ykt6
GO:0005769	early endosome	cellular_component	cell|cell part|organelle	25	1755	230	19037	0.220861	0.544753	1.17905	Adprhl1;Anxa2;Cftr;Coro1a;Cxcr4;Cytip;F2r;F2rl1;Fgd2;Gja1;Kifc1;Ldlr;Lipg;Pcsk9;Picalm;Rab32;Ret;RGD1563091;Rin3;RT1-Bb;Slc17a6;Slc5a7;St8sia2;Tfrc;Tmem108
GO:0005770	late endosome	cellular_component	cell|cell part|organelle	9	1755	127	19037	0.838554	0.910743	0.768706	Cd74;Cxcr4;F2r;Gja1;Ldlr;Lgmn;Pcsk9;RT1-DMb;Slc11a1
GO:0005771	multivesicular body	cellular_component	cell|cell part|organelle	5	1755	26	19037	0.0854528	0.320806	2.08602	Cd74;Gja1;Lrat;RT1-Bb;RT1-DMb
GO:0005773	vacuole	cellular_component	cell|cell part|organelle	2	1755	19	19037	0.533766	0.748901	1.14182	Cd74;Cit
GO:0005774	vacuolar membrane	cellular_component	cell|cell part|membrane|organelle|organelle part	1	1755	31	19037	0.950251	0.979438	0.349913	Slc36a3
GO:0005776	autophagosome	cellular_component	cell|cell part|organelle	3	1755	63	19037	0.938118	0.972622	0.516538	Il1b;Mefv;Tp53inp2
GO:0005777	peroxisome	cellular_component	cell|cell part|organelle	7	1755	124	19037	0.94646	0.978187	0.612347	Fdps;Idh1;Idi1;Lacc1;Nos2;Tkt;Vim
GO:0005782	peroxisomal matrix	cellular_component	cell|cell part|membrane-enclosed lumen|organelle|organelle part	1	1755	17	19037	0.806977	0.889729	0.638076	Prdx1
GO:0005783	endoplasmic reticulum	cellular_component	cell|cell part|organelle	109	1755	949	19037	0.00919889	0.0797506	1.2459	Adamts9;Adora1;Ano7;Arsi;Atp1a3;B3galnt1;B3gnt3;Bak1;Calr;Calu;Casp12;Cav3;Cd74;Cemip;Chi3l1;Ckap4;Clic4;Col1a1;Col1a2;Creb3l4;Crtap;Ctsz;Cybb;Cyp51;Dpp4;Drd1;Edem1;Entpd5;Erc2;Erp29;Ext1;F10;F5;Ftcd;Gjb1;Glra1;Gpx7;Hmox1;Hpd;Itga5;Itga8;Kdelr3;Lctl;Loxl2;Lrrc59;Lrrc8c;Manf;Mest;Mgp;Mogat1;Muc4;Nlrp3;Nucb2;Oas1a;Oas2;P2ry13;P3h1;P3h4;P4ha3;P4hb;Pcsk9;Pcyt1b;Pdia6;Pgr;Piezo1;Pld4;Plod2;Plod3;Prom1…
GO:0005784	Sec61 translocon complex	cellular_component	cell|cell part|macromolecular complex|membrane|membrane part|organelle|organelle part	2	1755	5	19037	0.070352	0.280328	4.33892	Sec61b;Ssr4
GO:0005788	endoplasmic reticulum lumen	cellular_component	cell|cell part|membrane-enclosed lumen|organelle|organelle part	13	1755	63	19037	0.00436036	0.048997	2.23833	Calr;Calu;Cercam;Colgalt1;Erp29;Lyz2;Ngf;P4ha3;P4hb;Pdia6;Rcn2;Serpinh1;Txndc5
GO:0005789	endoplasmic reticulum membrane	cellular_component	cell|cell part|membrane|membrane part|organelle|organelle part	44	1755	555	19037	0.874564	0.931194	0.859966	Abca17;Calu;Cftr;Ch25h;Creb3l4;Cyp1b1;Cyp2d1;Cyp51;Drd1;Fads3;Gja1;Grip1;Hmox1;Hpd;Hsd3b6;Ifi47;Kdelr3;Klhl41;Lrat;Lrrc59;Lrrc8c;March1;Mest;Mmp23;Mx1;Nox4;Oas1b;Piezo1;Ptgis;Ptgs2;RGD1559575;Rsad2;Sdf2l1;Sepn1;Serp2;Soat1;Spink5;Sqle;Ssr2;Tkt;Tmed3;Tmem132a;Tmem178a;Ugt2b7
GO:0005790	smooth endoplasmic reticulum	cellular_component	cell|cell part|organelle	4	1755	31	19037	0.319158	0.686015	1.39965	Calr;Erp29;Kcnj2;Pdia6
GO:0005791	rough endoplasmic reticulum	cellular_component	cell|cell part|organelle	12	1755	82	19037	0.0723785	0.284534	1.58741	Ccl2;Ckap4;Cybb;Htr7;Kcnj2;Lrat;Ncf1;Pcsk1;Pcsk9;Slc7a11;Tmem97;Zc3h12a
GO:0005793	endoplasmic reticulum-Golgi intermediate compartment	cellular_component	cell|cell part|organelle	9	1755	70	19037	0.193484	0.505521	1.39465	Fn1;Ftcd;Nucb2;P4hb;Pdia6;Prom1;Serpinh1;Surf4;Tmed3
GO:0005794	Golgi apparatus	cellular_component	cell|cell part|organelle	86	1755	917	19037	0.449539	0.714886	1.0173	Adam19;Aplp1;Arf2;Arf4;Atp1a3;Atp8b4;B3galnt1;B3gnt3;Calr;Calu;Cd14;Cd44;Cd74;Clspn;Col1a1;Cpz;Creb3l4;Cryab;Ctla4;Cybb;Dbi;Dpp4;Dynlt1;Esco2;Ext1;F5;Fam114a1;Fam198b;Fam20c;Fmnl3;Fstl3;Ftcd;Galnt16;Gdf15;Gja1;Grb14;Hck;Hip1;Hpd;Itga5;Itm2a;Kcnj2;Kif20a;Lax1;Ldlr;Lipg;Litaf;Lyn;Msln;Myh2;Myrf;Ncf1;Nfkbie;Nhs;Pcsk5;Pcsk9;Pdgfrb;Picalm;Pkmyt1;Plagl1;Plod3;Pmf1;Pthlh;Ptprn;Rab13;RGD1311946;Rnf144a;R…
GO:0005795	Golgi stack	cellular_component	cell|cell part|organelle|organelle part	3	1755	31	19037	0.554124	0.767189	1.04974	Lyz2;Plk3;Sulf1
GO:0005796	Golgi lumen	cellular_component	cell|cell part|membrane-enclosed lumen|organelle|organelle part	1	1755	9	19037	0.581326	0.772752	1.20525	Ngf
GO:0005797	Golgi medial cisterna	cellular_component	cell|cell part|organelle|organelle part	2	1755	14	19037	0.37477	0.688406	1.54961	Nucb2;Pcsk5
GO:0005801	cis-Golgi network	cellular_component	cell|cell part|organelle	1	1755	43	19037	0.984451	0.999443	0.252263	Ctgf
GO:0005802	trans-Golgi network	cellular_component	cell|cell part|organelle|organelle part	13	1755	157	19037	0.698457	0.83669	0.898184	Chac1;Chst4;Clvs1;Gsap;Ncf4;Ntsr2;Pcsk1;Pcsk5;Plod3;Postn;Rab13;Rab32;Tgfb2
GO:0005811	lipid droplet	cellular_component	cell|cell part|organelle	6	1755	77	19037	0.724831	0.846608	0.845244	Alox15;Anxa2;Ckap4;Fabp4;Rbp1;Rsad2
GO:0005813	centrosome	cellular_component	cell|cell part|organelle|organelle part	56	1755	478	19037	0.036882	0.203511	1.27081	Aspm;Aunip;Aurka;Camk2n2;Ccdc81;Ccdc88b;Ccnb1;Ccnb2;Ccne1;Ccnf;Ccsap;Cdc20;Cdc45;Cdk1;Cenpf;Cep55;Cep72;Chek1;Ckap2;Ckap2l;Clic4;Crmp1;Dtl;E2f1;Espl1;Gen1;Gsg2;H2afx;Haus4;Hmmr;Ivl;Kif20b;Kif23;Kif2c;LOC100302465;Mastl;Mcm3;Mettl21b;Ndc80;Ndn;Nek2;Nek2l1;Nek6;Ns5atp9;Plk1;Plk3;Plk4;Procr;Rad18;Rgcc;Rgs14;Sgo1;Slc1a4;Stil;Tacc3;Trim59
GO:0005814	centriole	cellular_component	cell|cell part|organelle|organelle part	11	1755	113	19037	0.471623	0.73204	1.05593	Aurka;Birc5;Ccnf;Ccsap;Cep55;Ftcd;LOC100302465;Plk4;Ran;Stil;Top2a
GO:0005815	microtubule organizing center	cellular_component	cell|cell part|organelle|organelle part	15	1755	124	19037	0.168181	0.459378	1.31217	Aurka;Camk2b;Cenpu;Cep55;Dlgap5;Gsdmc;Kifc1;Mllt11;Nek6;Pik3r5;Rpp25;Slc1a4;Specc1;Tacc3;Tpx2
GO:0005819	spindle	cellular_component	cell|cell part|organelle|organelle part	22	1755	97	19037	5.71844e-05	0.00191898	2.46021	Aurka;Aurkb;Ccsap;Cdc6;Cenpf;Crmp1;Dynlt1;Fbxo5;Gsg2;Incenp;Kif11;Kif15;Kif20a;Kif22;Kif23;Kif2c;Kifc1;Myh10;Plk1;Prc1;Rgs14;Tpx2
GO:0005826	actomyosin contractile ring	cellular_component	cell|cell part|organelle|organelle part	4	1755	9	19037	0.00620695	0.0621893	4.82102	Anln;Anlnl1;Myh2;Rtkn2
GO:0005828	kinetochore microtubule	cellular_component	cell|cell part|organelle|organelle part	3	1755	6	19037	0.0126377	0.096654	5.42365	Cenpe;Kif18a;Kntc1
GO:0005829	cytosol	cellular_component	cell|cell part	306	1755	3175	19037	0.194382	0.505521	1.04544	Abcb4;Actn1;Adh7;Adra1d;Aif1;Aim2;Akr1b8;Akr7a3;Aldh18a1;Aldh1a2;Aldh1a3;Aldh1a7;Alox15;Ankrd1;Anks1b;Anxa1;Anxa2;Aox2;Apold1;Arf4;Arg1;Arl4c;Aurka;Bak1;Bcat1;Bcl3;Birc5;Btk;Bub1;Bub1b;Calr;Camk2b;Camk2n2;Capn6;Car13;Car2;Carhsp1;Casp12;Ccna2;Ccnb1;Ccnb2;Cd44;Cdc20;Cdca2;Cdca3;Cdk1;Cdkn3;Cenpe;Cenpi;Cenpm;Cftr;Chac1;Chtf18;Ckap2;Ckap2l;Ckap4;Clca5;Clec5a;Clic4;Cntn5;Coro1a;Crmp1;Cryab;Ctgf;Cth;Cy…
GO:0005833	hemoglobin complex	cellular_component	cell|cell part|macromolecular complex	2	1755	10	19037	0.233788	0.556728	2.16946	Hbb;LOC689064
GO:0005834	heterotrimeric G-protein complex	cellular_component	cell|cell part|macromolecular complex|membrane|membrane part	4	1755	36	19037	0.427185	0.704458	1.20525	Gng13;Gng2;Gng4;Gngt2
GO:0005844	polysome	cellular_component	cell|cell part|macromolecular complex	3	1755	50	19037	0.851806	0.919372	0.650838	Calr;Myh10;Vim
GO:0005856	cytoskeleton	cellular_component	cell|cell part|organelle	26	1755	256	19037	0.331096	0.688406	1.10168	Add2;Amph;Cdc42ep1;Cnn1;Cotl1;Dbn1;Des;Erc2;Fgr;Flnc;Fscn1;Jak3;Klhl41;Krt77;LOC100364435;Map1b;Msn;Pstpip2;Ptpn7;Rac2;Rai14;S100a9;Slc7a11;Tmsb10;Vim;Zc3h12a
GO:0005859	muscle myosin complex	cellular_component	cell|cell part|macromolecular complex|organelle|organelle part	4	1755	12	19037	0.0194817	0.134142	3.61576	Mybpc1;Mybpc2;Mybph;Myh1
GO:0005861	troponin complex	cellular_component	cell|cell part|macromolecular complex|organelle|organelle part	1	1755	8	19037	0.53879	0.748901	1.35591	Tnnc1
GO:0005865	striated muscle thin filament	cellular_component	cell|cell part|organelle|organelle part	4	1755	18	19037	0.0774875	0.295399	2.41051	Acta1;Mybpc1;Mybpc2;Mybph
GO:0005868	cytoplasmic dynein complex	cellular_component	cell|cell part|macromolecular complex|organelle|organelle part	1	1755	26	19037	0.919252	0.960329	0.417204	Dynlt1
GO:0005871	kinesin complex	cellular_component	cell|cell part|macromolecular complex|organelle|organelle part	14	1755	52	19037	0.000186773	0.0046122	2.92043	Cenpe;Kif11;Kif14;Kif15;Kif18a;Kif18b;Kif20a;Kif20b;Kif22;Kif23;Kif2c;Kif4a;Kif5c;Kifc1
GO:0005874	microtubule	cellular_component	cell|cell part|organelle|organelle part	31	1755	259	19037	0.0797153	0.302024	1.29832	Aspm;Capn6;Cenpe;Kcnab2;Kif11;Kif14;Kif15;Kif18a;Kif18b;Kif20a;Kif20b;Kif22;Kif23;Kif2c;Kif4a;Kif5c;Kifc1;LOC100909441;LOC108348136;Map1b;Mefv;Rgs14;Tekt3;Tpx2;Tuba1a;Tuba1b;Tubb1;Tubb2a;Tubb2b;Tubb3;Tubb5
GO:0005875	microtubule associated complex	cellular_component	cell|cell part|macromolecular complex|organelle|organelle part	3	1755	22	19037	0.331103	0.688406	1.47918	Lrp8;Map1b;Mefv
GO:0005876	spindle microtubule	cellular_component	cell|cell part|organelle|organelle part	11	1755	36	19037	0.000270869	0.00621487	3.31445	Aurka;Aurkb;Birc5;Capn6;Cdk1;Kif11;Nusap1;Plk1;Ska1;Ska2;Spag5
GO:0005881	cytoplasmic microtubule	cellular_component	cell|cell part|organelle|organelle part	8	1755	49	19037	0.0777271	0.295627	1.77099	Birc5;Ckap2;Clip2;Dynlt1;Gtse1;Kif2c;Tuba1a;Tuba1b
GO:0005882	intermediate filament	cellular_component	cell|cell part|organelle|organelle part	13	1755	61	19037	0.00324986	0.039197	2.31172	Adora2a;Des;Gja1;Krt14;Krt17;Krt5;Krt76;Mns1;Nme2;RGD1305207;Slc1a4;Sync;Vim
GO:0005884	actin filament	cellular_component	cell|cell part|organelle|organelle part	15	1755	80	19037	0.00592187	0.0620225	2.03387	Acta1;Actn1;Aif1;Anxa1;Coro1a;Dbn1;Hck;Inpp5d;Lcp1;Pls3;Rac2;Sh2b2;Tpm3;Tpm4;Was
GO:0005885	Arp2/3 protein complex	cellular_component	cell|cell part|macromolecular complex|organelle|organelle part	1	1755	10	19037	0.619941	0.789613	1.08473	Arpc1b
GO:0005886	plasma membrane	cellular_component	cell|cell part|membrane	385	1755	4172	19037	0.500862	0.743307	1.00101	Abcb4;Abcc4;Actn1;Actn2;Adam12;Adam8;Adam9;Adcy2;Adcy7;Adgre1;Adh7;Adora1;Adora2a;Adra1d;Aldh1a3;Alox15;Ankh;Anks1b;Ano4;Ano7;Anxa1;Anxa2;Aoc1;Aplnr;Aplp1;Apold1;Aqp8;Arf4;Arhgap19;Arhgef39;Arl4c;Atp1a3;Atp1b1;Atp8b4;Basp1;Bcl3;Bdkrb1;Bmpr1b;Brca1;Bst1;Btk;C3ar1;C4bpa;C5ar1;Car2;Card11;Cass4;Cav3;Ccnyl1;Ccr3;Ccr7;Cd101;Cd14;Cd200r1;Cd247;Cd300a;Cd300ld;Cd300lf;Cd33;Cd38;Cd3e;Cd40;Cd44;Cd53;Cd55;C…
GO:0005887	integral component of plasma membrane	cellular_component	cell|cell part|membrane|membrane part	153	1755	1070	19037	1.86663e-08	2.03489e-06	1.55106	Abcc4;Adam8;Adcy2;Adora2a;Adra1d;Adra2b;Ankh;Aqp8;Axl;C3ar1;C5ar1;Cav3;Cd180;Cd22;Cd37;Cd40;Cd53;Cdhr1;Cftr;Chrna4;Clca1;Clca2;Clca4;Clca4l;Clca5;Csf1r;Ctla4;Cybb;Cysltr2;Drd1;Epgn;Ephb2;F2r;F2rl1;F2rl2;Fas;Fcer1a;Fcer1g;Ffar4;Fpr1;Fxyd5;Fxyd6;Gabrb3;Gabrp;Ggt1;Gja1;Gja5;Glra1;Gp6;Gpnmb;Gpr65;Gpr84;Grpr;Has1;Has2;Hbegf;Hrh1;Htr2a;Htr7;Icam1;Icos;Il17ra;Insrr;Kcna3;Kcna6;Kcnj16;Kcnj2;Kcnk12;Lilrb3…
GO:0005890	sodium:potassium-exchanging ATPase complex	cellular_component	cell|cell part|macromolecular complex|membrane|membrane part	2	1755	11	19037	0.269385	0.609577	1.97224	Atp1a3;Atp1b1
GO:0005892	acetylcholine-gated channel complex	cellular_component	cell|cell part|macromolecular complex|membrane|membrane part	1	1755	17	19037	0.806977	0.889729	0.638076	Chrna4
GO:0005901	caveola	cellular_component	cell|cell part|membrane|membrane part	14	1755	88	19037	0.0301081	0.178239	1.72571	Atp1b1;Cav3;Drd1;F2r;Hck;Hmox1;Htr2a;Kif18a;Ldlr;Lrp8;Ptgis;Ptgs2;Scn5a;Slc2a1
GO:0005902	microvillus	cellular_component	cell|cell part	13	1755	73	19037	0.0152379	0.111692	1.93171	Car2;Cd44;Cftr;Clca1;Clic4;Fscn1;Lyz2;Msn;Myo1g;Myo7a;Prom1;Spn;Tgfb1
GO:0005903	brush border	cellular_component	cell|cell part	8	1755	76	19037	0.402137	0.704458	1.14182	Actn1;Lctl;Lima1;Myh10;Prom1;Rgs19;Slc15a1;Tpm3
GO:0005905	clathrin-coated pit	cellular_component	cell|cell part|membrane|membrane part	5	1755	45	19037	0.401449	0.704458	1.20525	Fcho1;Ldlr;Picalm;Snap91;Tfrc
GO:0005911	cell-cell junction	cellular_component	cell junction	33	1755	181	19037	0.000109863	0.00317605	1.97768	Actn1;Cd2;Cd3e;Cd53;Cdh24;Cfl1;Clic4;Coro1a;Cxadr;Cxcr4;Dbn1;Des;Ect2;Fndc1;Fscn1;Gja1;Iqgap3;Itga4;Itga5;Itgal;Itgb1;Kirrel;Lck;Micall2;Myh2;Ncam1;Pak1;Ptk7;Ptpn6;Rab13;Slc2a1;Vav1;Was
GO:0005912	adherens junction	cellular_component	cell junction	3	1755	61	19037	0.928894	0.966104	0.533473	Cxadr;Itgb1;Rnd1
GO:0005913	cell-cell adherens junction	cellular_component	cell junction	13	1755	108	19037	0.194232	0.505521	1.30569	Anxa1;Anxa2;Cdc42ep1;Cdca3;Cdh11;Cdh24;Cxadr;Lyn;Ncr3;Pdlim5;PVR;S100a11;Tgm1
GO:0005915	zonula adherens	cellular_component	cell junction	1	1755	8	19037	0.53879	0.748901	1.35591	Actn1
GO:0005916	fascia adherens	cellular_component	cell junction	3	1755	13	19037	0.111292	0.362139	2.50322	Actn1;Des;Gja1
GO:0005921	gap junction	cellular_component	cell junction	8	1755	25	19037	0.00132646	0.0199717	3.47113	Dbn1;Des;Gja1;Gja4;Gja5;Gjb1;Gjb2;Nov
GO:0005922	connexin complex	cellular_component	cell|cell junction|cell part|macromolecular complex|membrane|membrane part	5	1755	20	19037	0.031748	0.180637	2.71182	Gja1;Gja4;Gja5;Gjb1;Gjb2
GO:0005923	bicellular tight junction	cellular_component	cell junction	9	1755	119	19037	0.779043	0.877748	0.820384	Actn1;Aoc1;Cldn15;Cldn2;Cxadr;Ect2;Jaml;Micall2;Rab13
GO:0005925	focal adhesion	cellular_component	cell junction	26	1755	152	19037	0.00148833	0.0218509	1.85546	Abcb4;Actn1;Actn2;Cav3;Enah;Fblim1;Fes;Hck;Itga2;Itga5;Itgav;Itgb1;Lasp1;Lcp1;Lima1;Msn;Nme2;Nox4;Pak1;Parvg;Peak1;Ptprc;Rexo2;Tes;Thy1;Xirp2
GO:0005929	cilium	cellular_component	cell|cell part|organelle	8	1755	168	19037	0.989673	1	0.516538	Abcc4;Aurka;Ccsap;Kif22;Pkd1l1;Prom1;Trim59;Tub
GO:0005930	axoneme	cellular_component	cell|cell part|organelle|organelle part	3	1755	89	19037	0.990904	1	0.365639	Ccsap;Cenpf;Mns1
GO:0005938	cell cortex	cellular_component	cell|cell part	16	1755	145	19037	0.261553	0.609178	1.19694	Anxa2;Bin2;Ctgf;Cytip;Dbn1;Fgg;Hmcn1;Melk;Myh10;Myo10;Ooep;Rai14;Rnd1;Rnd3;Sept5;Spink5
GO:0005940	septin ring	cellular_component	cell|cell part|organelle|organelle part	2	1755	14	19037	0.37477	0.688406	1.54961	Sept11;Sept5
GO:0005942	phosphatidylinositol 3-kinase complex	cellular_component	macromolecular complex|membrane|membrane part	2	1755	13	19037	0.340143	0.688406	1.66881	Pik3cg;Pik3r5
GO:0005975	carbohydrate metabolic process	biological_process	metabolic process	8	1755	110	19037	0.805997	0.889729	0.788894	Chi3l1;Chst4;Fut1;Lctl;Npl;Pgd;Pgk1;Pgm3
GO:0006006	glucose metabolic process	biological_process	metabolic process	3	1755	66	19037	0.949897	0.979438	0.493059	Fabp5;G6pd;Oas1a
GO:0006012	galactose metabolic process	biological_process	metabolic process	1	1755	8	19037	0.53879	0.748901	1.35591	Gale
GO:0006024	glycosaminoglycan biosynthetic process	biological_process	metabolic process	3	1755	11	19037	0.0735992	0.284534	2.95835	Ext1;Pdgfrb;Ugdh
GO:0006029	proteoglycan metabolic process	biological_process	cellular process|metabolic process	1	1755	6	19037	0.440322	0.704458	1.80788	Col11a1
GO:0006032	chitin catabolic process	biological_process	metabolic process	1	1755	8	19037	0.53879	0.748901	1.35591	Chi3l1
GO:0006044	N-acetylglucosamine metabolic process	biological_process	metabolic process	1	1755	13	19037	0.715711	0.839021	0.834407	Chst4
GO:0006048	UDP-N-acetylglucosamine biosynthetic process	biological_process	cellular process|metabolic process	1	1755	8	19037	0.53879	0.748901	1.35591	Pgm3
GO:0006068	ethanol catabolic process	biological_process	metabolic process	2	1755	12	19037	0.304935	0.660045	1.80788	Adh7;Aldh1a7
GO:0006069	ethanol oxidation	biological_process	metabolic process	1	1755	5	19037	0.38347	0.688406	2.16946	Adh7
GO:0006082	organic acid metabolic process	biological_process	cellular process|metabolic process	1	1755	44	19037	0.985887	0.999668	0.246529	Cyp2d1
GO:0006084	acetyl-CoA metabolic process	biological_process	cellular process|metabolic process	1	1755	9	19037	0.581326	0.772752	1.20525	Hmgcs1
GO:0006089	lactate metabolic process	biological_process	cellular process|metabolic process	1	1755	7	19037	0.491934	0.73204	1.54961	Ldha
GO:0006091	generation of precursor metabolites and energy	biological_process	cellular process|metabolic process	1	1755	15	19037	0.765745	0.867375	0.723153	Vgf
GO:0006094	gluconeogenesis	biological_process	metabolic process	1	1755	28	19037	0.933473	0.969012	0.387403	Pgk1
GO:0006096	glycolytic process	biological_process	cellular process|metabolic process	3	1755	34	19037	0.618207	0.789613	0.957114	Eno1;Hk3;Pgk1
GO:0006098	pentose-phosphate shunt	biological_process	cellular process|metabolic process	3	1755	11	19037	0.0735992	0.284534	2.95835	G6pd;Pgd;Tkt
GO:0006099	tricarboxylic acid cycle	biological_process	cellular process|metabolic process	1	1755	30	19037	0.94519	0.977285	0.361576	Idh1
GO:0006102	isocitrate metabolic process	biological_process	cellular process|metabolic process	1	1755	6	19037	0.440322	0.704458	1.80788	Idh1
GO:0006103	2-oxoglutarate metabolic process	biological_process	cellular process|metabolic process	1	1755	18	19037	0.824788	0.899354	0.602627	Idh1
GO:0006120	mitochondrial electron transport, NADH to ubiquinone	biological_process	cellular process|metabolic process	2	1755	16	19037	0.441554	0.704458	1.35591	Bdnf;LOC100912599
GO:0006123	mitochondrial electron transport, cytochrome c to oxygen	biological_process	cellular process|metabolic process	1	1755	14	19037	0.741937	0.853711	0.774807	Cox6a2
GO:0006139	nucleobase-containing compound metabolic process	biological_process	cellular process|metabolic process	1	1755	5	19037	0.38347	0.688406	2.16946	Rexo2
GO:0006164	purine nucleotide biosynthetic process	biological_process	cellular process|metabolic process	2	1755	9	19037	0.198499	0.505521	2.41051	Impdh1;Oas1a
GO:0006165	nucleoside diphosphate phosphorylation	biological_process	cellular process|metabolic process	1	1755	17	19037	0.806977	0.889729	0.638076	Nme2
GO:0006166	purine ribonucleoside salvage	biological_process	cellular process|metabolic process	1	1755	5	19037	0.38347	0.688406	2.16946	Prtfdc1
GO:0006171	cAMP biosynthetic process	biological_process	cellular process|metabolic process	2	1755	14	19037	0.37477	0.688406	1.54961	Adcy2;Adcy7
GO:0006182	cGMP biosynthetic process	biological_process	cellular process|metabolic process	2	1755	27	19037	0.725443	0.846608	0.803503	Adcy2;Adcy7
GO:0006183	GTP biosynthetic process	biological_process	cellular process|metabolic process	2	1755	10	19037	0.233788	0.556728	2.16946	Impdh1;Nme2
GO:0006206	pyrimidine nucleobase metabolic process	biological_process	cellular process|metabolic process	3	1755	8	19037	0.0307483	0.178239	4.06774	Rrm1;Rrm2;Tyms
GO:0006228	UTP biosynthetic process	biological_process	cellular process|metabolic process	1	1755	9	19037	0.581326	0.772752	1.20525	Nme2
GO:0006241	CTP biosynthetic process	biological_process	cellular process|metabolic process	1	1755	9	19037	0.581326	0.772752	1.20525	Nme2
GO:0006259	DNA metabolic process	biological_process	cellular process|metabolic process	3	1755	16	19037	0.178116	0.475714	2.03387	Dntt;Mki67;Tk1
GO:0006260	DNA replication	biological_process	cellular process|metabolic process	12	1755	75	19037	0.0409735	0.217336	1.73557	Cdt1;Fam111a;Fen1;Gins1;Gins3;Ns5atp9;Pola2;Pole;Prim1;Rrm1;Rrm2;Ticrr
GO:0006261	DNA-dependent DNA replication	biological_process	cellular process|metabolic process	5	1755	21	19037	0.0386015	0.207883	2.58269	Gins4;Orc6;Pole2;Polq;Wdhd1
GO:0006265	DNA topological change	biological_process	cellular component organization or biogenesis|cellular process|metabolic process	3	1755	10	19037	0.0573429	0.263118	3.25419	Hmgb2;Hmgb2l1;Top2a
GO:0006266	DNA ligation	biological_process	cellular process|metabolic process	1	1755	5	19037	0.38347	0.688406	2.16946	Top2a
GO:0006268	DNA unwinding involved in DNA replication	biological_process	cellular component organization or biogenesis|cellular process|metabolic process	4	1755	7	19037	0.00200526	0.0270142	6.19845	Mcm2;Mcm4;Mcm6;Rad51
GO:0006269	DNA replication, synthesis of RNA primer	biological_process	cellular process|metabolic process	1	1755	5	19037	0.38347	0.688406	2.16946	Prim1
GO:0006270	DNA replication initiation	biological_process	cellular process|metabolic process	14	1755	23	19037	1.11911e-09	1.78083e-07	6.6027	Ccne1;Cdc45;Cdc6;Cdc7;Gins4;Mcm10;Mcm2;Mcm3;Mcm4;Mcm5;Mcm6;Mcm8;Orc6;Pola2
GO:0006275	regulation of DNA replication	biological_process	biological regulation|cellular process|metabolic process|regulation of biological process	2	1755	13	19037	0.340143	0.688406	1.66881	Dscc1;Esco2
GO:0006281	DNA repair	biological_process	cellular process|metabolic process|response to stimulus	21	1755	167	19037	0.0891509	0.330931	1.36403	Ankle1;Apitd1;Bard1;Cdk1;Chek1;Chrna4;Eid3;Fancd2;Fanci;Fen1;Foxm1;H2afx;Kif22;Parpbp;Polq;Pttg1;Rad51c;Timeless;Ube2t;Uhrf1;Wdhd1
GO:0006284	base-excision repair	biological_process	cellular process|metabolic process|response to stimulus	3	1755	33	19037	0.597558	0.787117	0.986118	Hmga2;Neil3;Polq
GO:0006287	base-excision repair, gap-filling	biological_process	cellular process|metabolic process|response to stimulus	1	1755	6	19037	0.440322	0.704458	1.80788	Pole
GO:0006289	nucleotide-excision repair	biological_process	cellular process|metabolic process|response to stimulus	1	1755	38	19037	0.974754	0.993278	0.285455	Neil3
GO:0006297	nucleotide-excision repair, DNA gap filling	biological_process	cellular process|metabolic process|response to stimulus	1	1755	7	19037	0.491934	0.73204	1.54961	Pole
GO:0006298	mismatch repair	biological_process	cellular process|metabolic process|response to stimulus	1	1755	19	19037	0.840956	0.910743	0.57091	Exo1
GO:0006301	postreplication repair	biological_process	cellular process|metabolic process|response to stimulus	2	1755	11	19037	0.269385	0.609577	1.97224	Brca1;Rad18
GO:0006302	double-strand break repair	biological_process	cellular process|metabolic process|response to stimulus	7	1755	59	19037	0.299793	0.660045	1.28697	Brca1;Cdca5;Eme1;Esco2;Polq;Rad54l;Trip13
GO:0006306	DNA methylation	biological_process	cellular process|metabolic process	1	1755	20	19037	0.855633	0.919372	0.542365	Hells
GO:0006310	DNA recombination	biological_process	cellular process|metabolic process	7	1755	35	19037	0.0379202	0.206925	2.16946	Ccdc36;Eid3;Exo1;Hmgb2;Hmgb2l1;Rad51ap1;Rad51c
GO:0006312	mitotic recombination	biological_process	cellular process|metabolic process	2	1755	9	19037	0.198499	0.505521	2.41051	Rad51;Rad51c
GO:0006325	chromatin organization	biological_process	cellular component organization or biogenesis|cellular process	12	1755	72	19037	0.031013	0.179142	1.80788	H2afx;H2afy2;Hist1h1b;Hist1h2ah;Hist1h2ak;Hist1h2an;Hist1h2ba;Hist2h2aa3;Hist2h2ac;LOC100910554;LOC680322;Padi4
GO:0006334	nucleosome assembly	biological_process	cellular component organization or biogenesis|cellular process	35	1755	94	19037	1.41622e-13	5.37401e-11	4.03889	Asf1b;Cenpa;Chaf1a;Chaf1b;H2afy2;Hist1h1a;Hist1h1b;Hist1h1d;Hist1h2ail1;Hist1h2ao;Hist1h2ba;Hist1h2bcl1;Hist1h2bd;Hist1h2bf;Hist1h2bh;Hist1h2bk;Hist1h2bl;Hist1h2bo;Hist1h3a;Hist2h3c2;Hist2h4;Hist2h4a;Hist3h2bb;LOC100359692;LOC100365043;LOC100910200;LOC102548682;LOC102549061;LOC102549173;LOC680498;LOC684762;LOC684797;LOC684828;Mcm2;Padi4
GO:0006335	DNA replication-dependent nucleosome assembly	biological_process	cellular component organization or biogenesis|cellular process	6	1755	13	19037	0.000590432	0.0110745	5.00644	Asf1b;Chaf1a;Chaf1b;Hist1h2ao;Hist1h3a;Hist2h4
GO:0006336	DNA replication-independent nucleosome assembly	biological_process	cellular component organization or biogenesis|cellular process	3	1755	17	19037	0.202394	0.507839	1.91423	Asf1b;Hist1h2ao;Hist2h4
GO:0006337	nucleosome disassembly	biological_process	cellular component organization or biogenesis|cellular process	1	1755	14	19037	0.741937	0.853711	0.774807	Hist1h2ba
GO:0006338	chromatin remodeling	biological_process	cellular component organization or biogenesis|cellular process	4	1755	108	19037	0.991833	1	0.401752	Hmgb2;Padi4;RGD1560020_predicted;Suv39h2
GO:0006342	chromatin silencing	biological_process	biological regulation|cellular component organization or biogenesis|cellular process|metabolic process|negative regulation of biological process|regulation of biological process	17	1755	44	19037	1.41564e-07	1.14481e-05	4.191	H2afx;H2afy2;Hells;Hist1h2ac;Hist1h2ah;Hist1h2ai;Hist1h2ak;Hist1h2an;Hist1h2ao;Hist2h2aa3;Hist2h2ac;LOC100360754;LOC100910554;LOC103690190;LOC680322;LOC684773;LOC690131
GO:0006346	methylation-dependent chromatin silencing	biological_process	biological regulation|cellular component organization or biogenesis|cellular process|metabolic process|negative regulation of biological process|regulation of biological process	1	1755	10	19037	0.619941	0.789613	1.08473	Hells
GO:0006349	regulation of gene expression by genetic imprinting	biological_process	biological regulation|cellular process|metabolic process|regulation of biological process	2	1755	15	19037	0.408624	0.704458	1.44631	Brca1;Zfp57
GO:0006351	transcription, DNA-templated	biological_process	cellular process|metabolic process	39	1755	654	19037	0.999227	1	0.646857	Arntl2;Bcl3;Bhlhe40;Birc5;Brms1;Cenpu;Col4a2;E2f1;E2f7;E2f8;Egr3;Eid3;Fstl3;Hmgb2;Hmgb2l1;Irf5;Irf8;Lbh;Litaf;LOC100911917;Loxl2;Maff;Mlf1;Mxd3;Nfe2;Nlrp3;Padi4;Pax8;Phf11;Ptprn;Tbx21;Timeless;Tp53inp2;Trib3;Txn1;Uhrf1;Zcchc12;Zfp367;Zfp57
GO:0006352	DNA-templated transcription, initiation	biological_process	cellular process|metabolic process	3	1755	23	19037	0.357274	0.688406	1.41486	Hist1h2ao;Hist2h4;Hist2h4a
GO:0006355	regulation of transcription, DNA-templated	biological_process	biological regulation|cellular process|metabolic process|regulation of biological process	42	1755	890	19037	1	1	0.511895	Adora2a;Arnt2;Bcl11b;Carhsp1;Cenpu;Cks1b;E2f1;E2f3;E2f7;Egr1;Egr2;Eid3;Emx2;Eng;Ern2;Eya2;Foxc2;Foxm1;Gata4;Hmga2;Hmgb2;Ikzf1;LOC100912481;Mlf1;Ndn;Nfil3;Nr4a1;Padi4;Pax8;Pgr;Phf11;Pou2f2;Pttg1;RGD1560020_predicted;Sfmbt2;Sox18;Sox21;Spi1;Spib;Tcfl5;Tfec;Wt1
GO:0006357	regulation of transcription by RNA polymerase II	biological_process	biological regulation|cellular process|metabolic process|regulation of biological process	43	1755	478	19037	0.591433	0.781972	0.975803	Ankrd1;Arntl2;Bnc1;Brca1;Brip1;Cebpd;Cks2;Eomes;Erg;Etv4;Foxc2;Foxj1;Foxm1;Foxs1;Fstl3;Gata4;Glis1;Hist1h1d;Hmgb2;Hmgb2l1;Ikzf1;Inhba;Klhl6;LOC100910438;LOC100911917;LOC684828;LOC691153;Mybl1;Mybl2;Nfe2;Nfkbiz;Ptafr;Pttg1;RGD1560020_predicted;Runx3;Snai1;Spi1;Spib;Spic;Tead4;Vgll3;Wt1;Zfp367
GO:0006366	transcription by RNA polymerase II	biological_process	cellular process|metabolic process	44	1755	520	19037	0.749054	0.859122	0.917848	Ankrd1;Arnt2;Bcl11b;Brca1;Cebpd;Cebpe;Creb3l4;E2f3;Egr1;Egr2;Foxc2;Foxj1;Foxm1;Gata4;Gbx2;Glis1;Glis3;Heyl;Hmga2;Meox1;Mybl1;Mybl2;Mycn;Ndn;Nfil3;Nr4a1;Nr4a3;Pax8;Pax9;Pgr;Plagl1;Polr2l;Pou2f2;Pttg1;RGD1560020_predicted;Sox11;Spib;Spic;Tcfl5;Tead4;Tfec;Tp73;Wt1;Zic3
GO:0006378	mRNA polyadenylation	biological_process	cellular process|metabolic process	1	1755	24	19037	0.901994	0.94671	0.451971	Aplp1
GO:0006396	RNA processing	biological_process	cellular process|metabolic process	1	1755	53	19037	0.994104	1	0.204666	Wdhd1
GO:0006397	mRNA processing	biological_process	cellular process|metabolic process	4	1755	118	19037	0.99606	1	0.367705	Apobec1;Ern2;Fblim1;Noct
GO:0006401	RNA catabolic process	biological_process	cellular process|metabolic process	1	1755	18	19037	0.824788	0.899354	0.602627	Oas2
GO:0006402	mRNA catabolic process	biological_process	biological regulation|cellular process|metabolic process|negative regulation of biological process|regulation of biological process	2	1755	21	19037	0.589171	0.779191	1.03308	Slfn14;Zc3h12d
GO:0006412	translation	biological_process	cellular process|metabolic process	4	1755	203	19037	0.999995	1	0.21374	Ggt1;LOC100910528;Rbm3;Sox11
GO:0006417	regulation of translation	biological_process	biological regulation|cellular process|metabolic process|regulation of biological process	5	1755	57	19037	0.613442	0.789613	0.951517	Aplp1;Igf1;Rbm3;S100a9;Tyms
GO:0006418	tRNA aminoacylation for protein translation	biological_process	cellular process|metabolic process	1	1755	10	19037	0.619941	0.789613	1.08473	Gars
GO:0006457	protein folding	biological_process	cellular process	8	1755	102	19037	0.734242	0.853711	0.850768	Ahsp;Calr;Cryab;Erp29;P3h1;P4hb;Pdia6;Txndc5
GO:0006464	cellular protein modification process	biological_process	cellular process|metabolic process	1	1755	22	19037	0.88105	0.932065	0.493059	Loxl2
GO:0006465	signal peptide processing	biological_process	cellular process|metabolic process	1	1755	16	19037	0.787358	0.877748	0.677956	Pcsk5
GO:0006468	protein phosphorylation	biological_process	cellular process|metabolic process	50	1755	491	19037	0.248049	0.587153	1.10461	Alpk3;Aurka;Aurkb;Birc5;Bmpr1b;Btk;Bub1;Bub1b;Camk2b;Ccl12;Ccnb1;Ccne1;Cdk1;Cfl1;Chek1;Cit;Ephb2;Ern2;Fam20c;Gsg2;Hcst;Lck;LOC100912399;Lyn;Mapk10;Melk;Nek2;Nek6;Nuak1;Nuak2;Ooep;Pak1;Pbk;Peak1;Pik3cg;Pkmyt1;Plk1;Plk3;Plk4;Prkg2;Ptk7;Runx3;Spag5;Stk38l;Syk;Tgfb1;Tgfb2;Trib3;Trpm6;Ttbk1
GO:0006469	negative regulation of protein kinase activity	biological_process	biological regulation|cellular process|metabolic process|negative regulation of biological process|regulation of biological process	18	1755	110	19037	0.0116464	0.0952763	1.77501	Adora2a;Bgn;Camk2n2;Cav3;Drd1;Fabp4;Gadd45b;Gadd45g;Gstp1;Il6;Lrrc15;Podnl1;Prex1;Ptprc;Rtn4rl2;Socs3;Thy1;Trib3
GO:0006470	protein dephosphorylation	biological_process	cellular process|metabolic process	12	1755	118	19037	0.40531	0.704458	1.10311	Dlgap5;Dusp2;Dusp4;Eya2;Lck;Plpp1;Ppef1;Ppm1n;Ptpn22;Ptpn6;Ptpn7;Ptprc
GO:0006471	protein ADP-ribosylation	biological_process	cellular process|metabolic process	1	1755	20	19037	0.855633	0.919372	0.542365	Arf4
GO:0006486	protein glycosylation	biological_process	cellular process|metabolic process	7	1755	87	19037	0.701588	0.839021	0.872771	B3galnt1;B3gnt3;Ext1;Fut1;Ostc;Serp2;St8sia2
GO:0006487	protein N-linked glycosylation	biological_process	cellular process|metabolic process	4	1755	38	19037	0.469365	0.73204	1.14182	B3galnt1;Entpd5;Pgm3;Tmem258b
GO:0006488	dolichol-linked oligosaccharide biosynthetic process	biological_process	cellular process|metabolic process	1	1755	9	19037	0.581326	0.772752	1.20525	Pqlc3
GO:0006491	N-glycan processing	biological_process	cellular process|metabolic process	2	1755	15	19037	0.408624	0.704458	1.44631	Edem1;St8sia2
GO:0006493	protein O-linked glycosylation	biological_process	cellular process|metabolic process	5	1755	44	19037	0.382549	0.688406	1.23265	B3galnt1;B3gnt3;Pgm3;Plod2;Plod3
GO:0006508	proteolysis	biological_process	metabolic process	66	1755	460	19037	0.000198598	0.00480238	1.55635	Adam12;Adam8;Adamdec1;Adamts1;Adamts16;Adamts20;Adamts4;Adamts6;Adamts8;Adamts9;Adamtsl2;Adgb;C2;Capn6;Casp12;Cfi;Cma1;Cpa3;Cpa4;Cpz;Ctrb1;Ctrc;Ctsk;Ctss;Ctsz;Dpep2;Dpp4;Ecel1;Espl1;F10;Fap;Ggt1;Gzmk;Htra1;Klk14;Lgmn;Masp1;Mcpt1l1;Mmp10;Mmp17;Mmp19;Mmp2;Mmp23;Mmp7;Mmp8;Mmp9;Napsa;Nrip3;Pappa;Pcolce;Pcsk1;Plat;Plau;Prss12;Prss16;Prss23;Prss35;Ren;Sfrp1;Tll1;Tmprss11b;Tmprss11e;Tmprss11f;Tmprss11g;…
GO:0006509	membrane protein ectodomain proteolysis	biological_process	metabolic process	2	1755	25	19037	0.684879	0.824954	0.867783	Adam19;Adam9
GO:0006511	ubiquitin-dependent protein catabolic process	biological_process	cellular process|metabolic process	6	1755	204	19037	0.9999	1	0.319038	Dtl;Tp53inp2;Ubd;Ube2c;Uhrf1;Usp18
GO:0006513	protein monoubiquitination	biological_process	cellular process|metabolic process	3	1755	33	19037	0.597558	0.787117	0.986118	Dtl;Rad18;Ube2t
GO:0006518	peptide metabolic process	biological_process	cellular process|metabolic process	2	1755	16	19037	0.441554	0.704458	1.35591	Cma1;Cpz
GO:0006520	cellular amino acid metabolic process	biological_process	cellular process|metabolic process	2	1755	18	19037	0.5042	0.743341	1.20525	Ggt1;Hdc
GO:0006527	arginine catabolic process	biological_process	cellular process|metabolic process	1	1755	6	19037	0.440322	0.704458	1.80788	Nos2
GO:0006536	glutamate metabolic process	biological_process	cellular process|metabolic process	2	1755	15	19037	0.408624	0.704458	1.44631	Aldh18a1;Ggt1
GO:0006541	glutamine metabolic process	biological_process	cellular process|metabolic process	1	1755	18	19037	0.824788	0.899354	0.602627	Phgdh
GO:0006544	glycine metabolic process	biological_process	cellular process|metabolic process	1	1755	8	19037	0.53879	0.748901	1.35591	Phgdh
GO:0006559	L-phenylalanine catabolic process	biological_process	cellular process|metabolic process	1	1755	7	19037	0.491934	0.73204	1.54961	Hpd
GO:0006563	L-serine metabolic process	biological_process	cellular process|metabolic process	1	1755	6	19037	0.440322	0.704458	1.80788	Phgdh
GO:0006572	tyrosine catabolic process	biological_process	cellular process|metabolic process	2	1755	5	19037	0.070352	0.280328	4.33892	Hpd;Hpdl
GO:0006590	thyroid hormone generation	biological_process	biological regulation|cellular process|metabolic process	2	1755	10	19037	0.233788	0.556728	2.16946	Dio2;Tg
GO:0006605	protein targeting	biological_process	establishment of localization|localization	1	1755	38	19037	0.974754	0.993278	0.285455	Sec61g
GO:0006606	protein import into nucleus	biological_process	establishment of localization|localization	6	1755	70	19037	0.634894	0.806783	0.929768	Cfl1;Drd1;Fgf9;Kpna2;Prickle1;Ran
GO:0006607	NLS-bearing protein import into nucleus	biological_process	establishment of localization|localization	1	1755	18	19037	0.824788	0.899354	0.602627	Kpna2
GO:0006611	protein export from nucleus	biological_process	establishment of localization|localization	5	1755	30	19037	0.137396	0.406826	1.80788	Ankle1;Calr;Egr2;Ran;Tgfb1
GO:0006612	protein targeting to membrane	biological_process	establishment of localization|localization	3	1755	40	19037	0.726589	0.847544	0.813547	Adora1;Ncf1;Rtp4
GO:0006616	SRP-dependent cotranslational protein targeting to membrane, translocation	biological_process	establishment of localization|localization	1	1755	7	19037	0.491934	0.73204	1.54961	Sec61b
GO:0006621	protein retention in ER lumen	biological_process	biological regulation|cellular process|localization	1	1755	7	19037	0.491934	0.73204	1.54961	Kdelr3
GO:0006629	lipid metabolic process	biological_process	metabolic process	4	1755	97	19037	0.982239	0.998453	0.447311	Ch25h;Fabp5;Ldlr;Plcxd2
GO:0006631	fatty acid metabolic process	biological_process	cellular process|metabolic process	3	1755	69	19037	0.959557	0.98594	0.471621	C3;Fabp4;Ggt1
GO:0006633	fatty acid biosynthetic process	biological_process	cellular process|metabolic process	3	1755	38	19037	0.693421	0.830859	0.856365	Brca1;Fads3;Olah
GO:0006635	fatty acid beta-oxidation	biological_process	cellular process|metabolic process	1	1755	47	19037	0.989449	1	0.230793	Echs1
GO:0006637	acyl-CoA metabolic process	biological_process	cellular process|metabolic process	1	1755	29	19037	0.939615	0.972743	0.374045	Dbi
GO:0006641	triglyceride metabolic process	biological_process	cellular process|metabolic process	7	1755	38	19037	0.0560569	0.263118	1.99819	Apobec1;Apobr;Apoc3;Cav3;Dbi;Nkx2-3;Pcsk9
GO:0006642	triglyceride mobilization	biological_process	cellular process|metabolic process	1	1755	6	19037	0.440322	0.704458	1.80788	Apoc3
GO:0006644	phospholipid metabolic process	biological_process	cellular process|metabolic process	5	1755	42	19037	0.344716	0.688406	1.29134	Hmox1;Pcsk9;Pla2g2d;Plpp1;Plpp4
GO:0006646	phosphatidylethanolamine biosynthetic process	biological_process	cellular process|metabolic process	1	1755	10	19037	0.619941	0.789613	1.08473	Alox15
GO:0006656	phosphatidylcholine biosynthetic process	biological_process	cellular process|metabolic process	1	1755	13	19037	0.715711	0.839021	0.834407	Fabp5
GO:0006657	CDP-choline pathway	biological_process	cellular process|metabolic process	1	1755	7	19037	0.491934	0.73204	1.54961	Pcyt1b
GO:0006686	sphingomyelin biosynthetic process	biological_process	cellular process|metabolic process	1	1755	5	19037	0.38347	0.688406	2.16946	Sgms2
GO:0006691	leukotriene metabolic process	biological_process	cellular process|metabolic process	2	1755	8	19037	0.163948	0.448809	2.71182	Ncf1;Tlr2
GO:0006693	prostaglandin metabolic process	biological_process	cellular process|metabolic process	2	1755	22	19037	0.614978	0.789613	0.986118	Ces2h;Ptgr1
GO:0006694	steroid biosynthetic process	biological_process	metabolic process	4	1755	24	19037	0.17512	0.473872	1.80788	Cyp51;Dbi;Hsd3b6;Timp1
GO:0006695	cholesterol biosynthetic process	biological_process	metabolic process	5	1755	29	19037	0.123307	0.394341	1.87022	Cftr;Fdps;G6pd;Hmgcs1;Idi1
GO:0006700	C21-steroid hormone biosynthetic process	biological_process	biological regulation|cellular process|metabolic process	2	1755	5	19037	0.070352	0.280328	4.33892	Cyp11b2;Hsd3b6
GO:0006702	androgen biosynthetic process	biological_process	biological regulation|cellular process|metabolic process	1	1755	8	19037	0.53879	0.748901	1.35591	Hsd3b6
GO:0006704	glucocorticoid biosynthetic process	biological_process	metabolic process	1	1755	6	19037	0.440322	0.704458	1.80788	Cyp11b2
GO:0006725	cellular aromatic compound metabolic process	biological_process	cellular process|metabolic process	2	1755	7	19037	0.130648	0.394341	3.09923	Cyp1b1;Sqle
GO:0006729	tetrahydrobiopterin biosynthetic process	biological_process	cellular process|metabolic process	2	1755	8	19037	0.163948	0.448809	2.71182	Dhfr;Gch1
GO:0006730	one-carbon metabolic process	biological_process	cellular process|metabolic process	7	1755	27	19037	0.00953477	0.0801	2.81226	Aldh1l2;Car1;Car13;Car2;Dhfr;Mat1a;Mthfd2
GO:0006739	NADP metabolic process	biological_process	cellular process|metabolic process	2	1755	10	19037	0.233788	0.556728	2.16946	G6pd;Pgd
GO:0006744	ubiquinone biosynthetic process	biological_process	cellular process|metabolic process	1	1755	15	19037	0.765745	0.867375	0.723153	Coq10b
GO:0006749	glutathione metabolic process	biological_process	cellular process|metabolic process	8	1755	52	19037	0.10212	0.341993	1.66881	Clic1;Clic4;Cth;G6pd;Gstm1;Gstp1;Hbb;Idh1
GO:0006750	glutathione biosynthetic process	biological_process	cellular process|metabolic process	1	1755	9	19037	0.581326	0.772752	1.20525	Ggt1
GO:0006751	glutathione catabolic process	biological_process	cellular process|metabolic process	2	1755	6	19037	0.0992091	0.333151	3.61576	Chac1;Ggt1
GO:0006754	ATP biosynthetic process	biological_process	cellular process|metabolic process	1	1755	15	19037	0.765745	0.867375	0.723153	Tgfb1
GO:0006790	sulfur compound metabolic process	biological_process	cellular process|metabolic process	2	1755	13	19037	0.340143	0.688406	1.66881	Chst4;Pax8
GO:0006796	phosphate-containing compound metabolic process	biological_process	cellular process|metabolic process	2	1755	12	19037	0.304935	0.660045	1.80788	Enpp3;Tgfb1
GO:0006801	superoxide metabolic process	biological_process	cellular process|metabolic process	7	1755	16	19037	0.000302592	0.00681591	4.74569	Cybb;Ncf1;Nos2;Nox4;Noxa1;Nqo1;Sh3pxd2b
GO:0006805	xenobiotic metabolic process	biological_process	cellular process|metabolic process|response to stimulus	3	1755	60	19037	0.923821	0.963877	0.542365	Cyp1b1;Cyp2d1;Gstp1
GO:0006807	nitrogen compound metabolic process	biological_process	metabolic process	1	1755	14	19037	0.741937	0.853711	0.774807	Pdgfrb
GO:0006809	nitric oxide biosynthetic process	biological_process	cellular process|metabolic process	3	1755	10	19037	0.0573429	0.263118	3.25419	Cyp1b1;Nos2;P2rx4
GO:0006810	transport	biological_process	establishment of localization|localization	1	1755	22	19037	0.88105	0.932065	0.493059	Slc6a2
GO:0006811	ion transport	biological_process	establishment of localization|localization	7	1755	40	19037	0.0706948	0.280787	1.89828	Add2;Cldn15;Glra1;Lasp1;Lcn2;Lgals9;Slc4a5
GO:0006812	cation transport	biological_process	establishment of localization|localization	4	1755	44	19037	0.587558	0.779191	0.986118	P2rx4;P2rx5;Piezo1;Piezo2
GO:0006813	potassium ion transport	biological_process	establishment of localization|localization	5	1755	67	19037	0.7516	0.861841	0.8095	Atp1a3;Atp1b1;Gja5;Kcna3;Kcnj2
GO:0006814	sodium ion transport	biological_process	establishment of localization|localization	13	1755	95	19037	0.0962735	0.333151	1.48437	Atp1a3;Atp1b1;RGD1563815;Scn3b;Scn5a;Scnn1a;Slc13a5;Slc17a6;Slc38a4;Slc4a5;Slc4a8;Slc5a7;Slc9b2
GO:0006816	calcium ion transport	biological_process	establishment of localization|localization	12	1755	101	19037	0.218984	0.540395	1.28879	Camk2b;Ccl12;Ccl5;Ccr5;Chrna4;Coro1a;Cyp27b1;Gja4;P2rx4;Ramp3;RGD1560020_predicted;Trpm8
GO:0006817	phosphate ion transport	biological_process	establishment of localization|localization	1	1755	10	19037	0.619941	0.789613	1.08473	Ankh
GO:0006820	anion transport	biological_process	establishment of localization|localization	5	1755	22	19037	0.0462885	0.228799	2.46529	Glra1;Slc17a6;Slc26a9;Slc4a1;Slc4a5
GO:0006821	chloride transport	biological_process	establishment of localization|localization	11	1755	53	19037	0.00802983	0.0709877	2.25133	Ano4;Ano7;Cftr;Clca2;Clca5;Clic1;Clic4;Glra1;Slc26a9;Slc4a1;Ttyh3
GO:0006826	iron ion transport	biological_process	establishment of localization|localization	2	1755	20	19037	0.562097	0.772752	1.08473	Slc11a1;Slc39a14
GO:0006828	manganese ion transport	biological_process	establishment of localization|localization	2	1755	13	19037	0.340143	0.688406	1.66881	Slc11a1;Trpm2
GO:0006829	zinc ion transport	biological_process	establishment of localization|localization	3	1755	16	19037	0.178116	0.475714	2.03387	Slc39a1;Slc39a14;Slc39a8
GO:0006833	water transport	biological_process	establishment of localization|localization	2	1755	16	19037	0.441554	0.704458	1.35591	Aqp8;Cftr
GO:0006836	neurotransmitter transport	biological_process	establishment of localization|localization	3	1755	30	19037	0.531386	0.748901	1.08473	Slc6a2;Slc6a20;Sv2c
GO:0006839	mitochondrial transport	biological_process	establishment of localization|localization	1	1755	58	19037	0.99637	1	0.187022	Ucp2
GO:0006851	mitochondrial calcium ion transmembrane transport	biological_process	establishment of localization|localization	1	1755	13	19037	0.715711	0.839021	0.834407	Mcub
GO:0006855	drug transmembrane transport	biological_process	establishment of localization|localization|response to stimulus	2	1755	25	19037	0.684879	0.824954	0.867783	Abcb1b;Abcb4
GO:0006857	oligopeptide transport	biological_process	establishment of localization|localization	1	1755	5	19037	0.38347	0.688406	2.16946	Slc15a1
GO:0006865	amino acid transport	biological_process	establishment of localization|localization	1	1755	13	19037	0.715711	0.839021	0.834407	Slc6a20
GO:0006869	lipid transport	biological_process	establishment of localization|localization	8	1755	66	19037	0.261035	0.608547	1.31482	Abca17;Ano7;Apobr;Apoc3;Apol2;Apold1;Cav3;Gpihbp1
GO:0006874	cellular calcium ion homeostasis	biological_process	biological regulation|cellular process	11	1755	96	19037	0.269297	0.609577	1.24292	Atp1b1;Ccl12;Ccl2;Ccl5;Cd40;Htr2a;Itgav;Itgb1;Stc2;Tgfb1;Trpm8
GO:0006878	cellular copper ion homeostasis	biological_process	biological regulation|cellular process	1	1755	13	19037	0.715711	0.839021	0.834407	Prnd
GO:0006879	cellular iron ion homeostasis	biological_process	biological regulation|cellular process	3	1755	44	19037	0.784393	0.877748	0.739588	Hmox1;Slc11a1;Tfrc
GO:0006882	cellular zinc ion homeostasis	biological_process	biological regulation|cellular process	4	1755	21	19037	0.122083	0.393104	2.06615	Lck;Slc39a13;Slc39a14;Slc39a8
GO:0006883	cellular sodium ion homeostasis	biological_process	biological regulation|cellular process	2	1755	20	19037	0.562097	0.772752	1.08473	Atp1a3;Atp1b1
GO:0006885	regulation of pH	biological_process	biological regulation	4	1755	20	19037	0.106182	0.351304	2.16946	Edn1;Ednrb;Slc26a9;Slc4a5
GO:0006886	intracellular protein transport	biological_process	establishment of localization|localization	16	1755	271	19037	0.982599	0.998453	0.640431	Adprhl1;Cd74;Drd1;Dynlt1;Erp29;Gpihbp1;Kpna2;Myo7a;Rab13;Rab32;Ramp3;Scg5;Sec24d;Syndig1;Tmed3;Unc93b1
GO:0006887	exocytosis	biological_process	cellular process|establishment of localization|localization	9	1755	93	19037	0.490942	0.73204	1.04974	Ccl12;Ccl5;Hck;Myh10;Myo1g;Pak1;Prss12;Vmp1;Ykt6
GO:0006888	ER to Golgi vesicle-mediated transport	biological_process	establishment of localization|localization	4	1755	107	19037	0.991225	1	0.405506	Sec24d;Tfg;Tmed3;Ykt6
GO:0006890	retrograde vesicle-mediated transport, Golgi to ER	biological_process	establishment of localization|localization	1	1755	32	19037	0.954845	0.983146	0.338978	Arf4
GO:0006897	endocytosis	biological_process	establishment of localization|localization	7	1755	135	19037	0.970702	0.991684	0.562452	Cav3;Hip1;Ldlr;Lrp8;Picalm;Rac2;Was
GO:0006898	receptor-mediated endocytosis	biological_process	establishment of localization|localization	22	1755	106	19037	0.00022755	0.00542273	2.25133	Apobr;Cd14;Cd300a;Cfi;Enpp3;Fcgr1a;Fcrl2;Hhipl1;Hspg2;Ldlr;Lgals3bp;Loxl2;Loxl4;Lrp8;Msr1;Olr1;Picalm;Prg4;Prss12;Snap91;Ssc5d;Tmem108
GO:0006900	vesicle budding from membrane	biological_process	cellular component organization or biogenesis|cellular process|establishment of localization|localization	1	1755	7	19037	0.491934	0.73204	1.54961	Anxa2
GO:0006903	vesicle targeting	biological_process	cellular process|establishment of localization|localization	1	1755	10	19037	0.619941	0.789613	1.08473	Ykt6
GO:0006904	vesicle docking involved in exocytosis	biological_process	cellular process|establishment of localization|localization	4	1755	34	19037	0.384184	0.688406	1.27615	Cftr;Plek;Rab13;Ykt6
GO:0006906	vesicle fusion	biological_process	cellular component organization or biogenesis|cellular process|establishment of localization|localization	4	1755	65	19037	0.861263	0.922809	0.667526	Syt10;Syt12;Syt13;Ykt6
GO:0006909	phagocytosis	biological_process	establishment of localization|localization	15	1755	48	19037	1.61451e-05	0.000692556	3.38978	Anxa1;Axl;Cdc7;Cebpe;Coro1a;Hck;Irf8;Itgam;Myo1g;Myo7a;Ncf2;Ncf4;Pld4;Slc11a1;Vav1
GO:0006910	phagocytosis, recognition	biological_process	cellular process|establishment of localization|localization	5	1755	13	19037	0.00453078	0.0497781	4.17204	Clec7a;Fcgr1a;Mfge8;Sirpa;Tub
GO:0006911	phagocytosis, engulfment	biological_process	cellular component organization or biogenesis|cellular process|establishment of localization|localization	14	1755	29	19037	6.23176e-08	5.80024e-06	5.23662	Aif1;Arhgap25;Bin2;C3;Fcer1g;Fcgr1a;Havcr1;Itgam;Itgb2;Mfge8;Msr1;Sirpa;Trem2;Treml4
GO:0006913	nucleocytoplasmic transport	biological_process	establishment of localization|localization	2	1755	38	19037	0.877121	0.931853	0.57091	Ran;Rgs14
GO:0006914	autophagy	biological_process	cellular process|metabolic process	5	1755	89	19037	0.922124	0.962881	0.609399	Napsa;S100a8;S100a9;Trim30c;Vmp1
GO:0006915	apoptotic process	biological_process	cellular process	42	1755	346	19037	0.0397657	0.212299	1.31672	Bak1;Bcl2a1;Birc5;Brms1;C5ar1;Casp12;Cdk1;Chek1;Chi3l1;Dio3;Fas;Gadd45g;Gdf6;Gja1;Grem1;Hip1;Inpp5d;Lck;Lgals1;Lgals7;Lmnb1;Mcm2;Melk;Mtfr2;Ncf1;Nek6;Nlrc4;Nr4a1;Nuak2;Pak1;Pcsk9;Phlda1;Plagl1;Plk3;Pmaip1;S100a8;S100a9;Serpinb9;Trpv2;Unc5a;Wt1;Zc3h12a
GO:0006919	activation of cysteine-type endopeptidase activity involved in apoptotic process	biological_process	biological regulation|cellular process|metabolic process|positive regulation of biological process|regulation of biological process	13	1755	77	19037	0.0230797	0.147668	1.83136	Bak1;Casp12;F2r;F3;Hip1;Lck;Nlrc4;Nlrp1a;Nlrp3;Pmaip1;Ret;S100a8;S100a9
GO:0006924	activation-induced cell death of T cells	biological_process	biological regulation|cellular process|immune system process	2	1755	6	19037	0.0992091	0.333151	3.61576	Fas;Il2ra
GO:0006929	substrate-dependent cell migration	biological_process	cellular process|localization|locomotion	2	1755	6	19037	0.0992091	0.333151	3.61576	Fmnl1;Itga2
GO:0006930	substrate-dependent cell migration, cell extension	biological_process	cellular component organization or biogenesis|cellular process|localization|locomotion	1	1755	8	19037	0.53879	0.748901	1.35591	Myh10
GO:0006935	chemotaxis	biological_process	locomotion|response to stimulus	21	1755	68	19037	4.2981e-07	3.07283e-05	3.3499	C3;C3ar1;Ccr1l1;Ccr3;Ccr4;Ccr5;Ccr7;Cmklr1;Cxcl10;Cxcl11;Cxcl9;Cxcr2;Cxcr4;Cyr61;Dock2;Fes;Lyn;Nckap1l;Prok2;Ptafr;Rac2
GO:0006936	muscle contraction	biological_process	multicellular organismal process	11	1755	54	19037	0.00926467	0.0801	2.20963	Actn2;Drd1;Glra1;Mybpc1;Mybpc2;Myh1;Myh2;Myh4;Myl1;Tpm3;Tpm4
GO:0006937	regulation of muscle contraction	biological_process	biological regulation|multicellular organismal process|regulation of biological process	1	1755	18	19037	0.824788	0.899354	0.602627	Tnnc1
GO:0006939	smooth muscle contraction	biological_process	multicellular organismal process	1	1755	15	19037	0.765745	0.867375	0.723153	Htr7
GO:0006941	striated muscle contraction	biological_process	multicellular organismal process	4	1755	22	19037	0.138926	0.40793	1.97224	Mybpc1;Mybpc2;Mybph;Myh1
GO:0006950	response to stress	biological_process	NA	1	1755	12	19037	0.686821	0.824954	0.903941	Kmo
GO:0006952	defense response	biological_process	response to stimulus	12	1755	50	19037	0.00159893	0.0231306	2.60335	Ccr5;Cd74;Cxcl1;Cxcl6;Ifi47;Irg1;Reg1a;Reg3b;Reg3g;RGD1559575;Ssc5d;Tlr1
GO:0006953	acute-phase response	biological_process	response to stimulus	6	1755	36	19037	0.109112	0.359791	1.80788	Fn1;Il6;Lbp;Reg3b;Reg3g;Tfrc
GO:0006954	inflammatory response	biological_process	response to stimulus	99	1755	300	19037	5.85719e-31	9.63117e-28	3.57961	Adam8;Aif1;Anxa1;Apoc3;Axl;Bdkrb1;Bmpr1b;C3;C3ar1;C5ar1;Ccl12;Ccl17;Ccl2;Ccl22;Ccl5;Ccl7;Ccl9;Ccr1l1;Ccr3;Ccr4;Ccr5;Ccr7;Cd14;Cd180;Cd40;Cd44;Chi3l1;Ciita;Cnr2;Csf1r;Cxcl1;Cxcl10;Cxcl11;Cxcl13;Cxcl2;Cxcl3;Cxcl6;Cxcl9;Cybb;F2r;F2rl1;Fas;Fpr1;Hck;Hist1h2ba;Hrh1;Ido1;Igfbp4;Il10;Il17b;Il17f;Il18;Il1a;Il1b;Il1f10;Il2ra;Il36b;Il6;Jak3;Lgals9;LOC103689965;Ltb4r;Ltb4r2;Lxn;Map2k3;Mefv;Naip6;Ncf1;Nfkbiz;…
GO:0006955	immune response	biological_process	immune system process|response to stimulus	70	1755	228	19037	3.11688e-20	1.92195e-17	3.33031	C1qb;C4bpa;Ccr1l1;Ccr4;Ccr5;Ccr7;Cd40;Cd80;Clec4e;Cma1;Ctla4;Ctss;Cxcl1;Cxcl10;Cxcl11;Cxcl13;Cxcl2;Cxcl3;Cxcl6;Cxcl9;Enpp3;Fas;Fcar;Fcer1a;Fyb;Il10;Il1a;Il1b;Il1f10;Il36b;Irf8;Lax1;Lif;LOC108348072;Lst1;March1;Nfil3;Nkx2-3;Oas1a;Oas1b;Oas1i;Oas2;Oas3;Oasl2;Pdcd1lg2;Prg3;Prg4;Relt;RGD1565355;RT1-Bb;RT1-Da;RT1-Db1;RT1-DMb;RT1-DOb;Sectm1a;Sectm1b;Serpinb9;Slpi;Thbs1;Tlr2;Tlr9;Tnfrsf10b;Tnfrsf11b;Tnf…
GO:0006956	complement activation	biological_process	biological regulation|immune system process|metabolic process|positive regulation of biological process|regulation of biological process|response to stimulus	5	1755	15	19037	0.00904529	0.0786956	3.61576	C2;C3;LOC103689965;Masp1;Rgcc
GO:0006957	complement activation, alternative pathway	biological_process	biological regulation|immune system process|metabolic process|positive regulation of biological process|regulation of biological process|response to stimulus	1	1755	6	19037	0.440322	0.704458	1.80788	C3
GO:0006958	complement activation, classical pathway	biological_process	biological regulation|immune system process|metabolic process|positive regulation of biological process|regulation of biological process|response to stimulus	7	1755	27	19037	0.00953477	0.0801	2.81226	C1qa;C1qb;C1qc;C2;C3;C4bpa;Cfi
GO:0006959	humoral immune response	biological_process	immune system process|response to stimulus	2	1755	30	19037	0.777931	0.877748	0.723153	Foxj1;Gpr183
GO:0006968	cellular defense response	biological_process	response to stimulus	2	1755	9	19037	0.198499	0.505521	2.41051	Cxcr2;Ncf1
GO:0006970	response to osmotic stress	biological_process	response to stimulus	3	1755	26	19037	0.434498	0.704458	1.25161	Apobec1;Plk3;Slc2a1
GO:0006974	cellular response to DNA damage stimulus	biological_process	cellular process|response to stimulus	29	1755	246	19037	0.101114	0.339318	1.27875	Apitd1;Bcl3;Brca1;Chek1;Ctla4;Ddias;Dtl;Fancd2;H2afx;LOC100302465;Lyn;Mb21d1;Mcm10;Mcm8;Nek6;Ns5atp9;Plk3;Pmaip1;Polq;Rad18;Rad51;Rad54b;Rad54l;Timeless;Top2a;Tp73;Ube2t;Wdhd1;Zc3h12a
GO:0006975	DNA damage induced protein phosphorylation	biological_process	cellular process|metabolic process|response to stimulus	1	1755	7	19037	0.491934	0.73204	1.54961	Chek1
GO:0006977	DNA damage response, signal transduction by p53 class mediator resulting in cell cycle arrest	biological_process	biological regulation|cellular process|negative regulation of biological process|positive regulation of biological process|regulation of biological process|response to stimulus|signaling	1	1755	12	19037	0.686821	0.824954	0.903941	Muc1
GO:0006978	DNA damage response, signal transduction by p53 class mediator resulting in transcription of p21 class mediator	biological_process	biological regulation|cellular process|regulation of biological process|response to stimulus|signaling	3	1755	17	19037	0.202394	0.507839	1.91423	Foxm1;Muc1;Tp73
GO:0006979	response to oxidative stress	biological_process	response to stimulus	22	1755	140	19037	0.00917338	0.0796695	1.70457	Btg3;Chrna4;Cygb;G6pd;Gatm;Gpx2;Gpx7;Hmox1;Idh1;Lcn2;Mmp2;Mmp9;Nqo1;Prdx1;Ptgs2;Pxdn;Rcan1;Rgs14;Slc7a11;Srxn1;Stc2;Txnrd1
GO:0006986	response to unfolded protein	biological_process	response to stimulus	3	1755	38	19037	0.693421	0.830859	0.856365	Chac1;Manf;Thbs4
GO:0006997	nucleus organization	biological_process	cellular component organization or biogenesis|cellular process	2	1755	24	19037	0.662814	0.815174	0.903941	Cep55;Chek1
GO:0006998	nuclear envelope organization	biological_process	cellular component organization or biogenesis|cellular process	1	1755	23	19037	0.892028	0.93985	0.471621	Ankle1
GO:0007005	mitochondrion organization	biological_process	cellular component organization or biogenesis|cellular process	4	1755	79	19037	0.940978	0.97395	0.54923	Cxadr;Mtfr2;Rab32;Sepn1
GO:0007009	plasma membrane organization	biological_process	cellular component organization or biogenesis|cellular process	1	1755	16	19037	0.787358	0.877748	0.677956	Cav3
GO:0007010	cytoskeleton organization	biological_process	cellular component organization or biogenesis|cellular process	18	1755	128	19037	0.046429	0.229034	1.5254	Ccl12;Ccl2;Ccl7;Cfl1;Dock2;Fmnl3;Ftcd;Hmmr;Krt76;LOC100909441;Pstpip2;Sirpa;Strip2;Thy1;Tuba1a;Tubb2a;Tubb2b;Tubb3
GO:0007015	actin filament organization	biological_process	cellular component organization or biogenesis|cellular process	21	1755	112	19037	0.00126764	0.0191818	2.03387	Actn1;Akap2;Arhgap25;Cav3;Cfl1;Cfl2;Coro1a;Dbn1;Enah;Hip1;LOC100364435;Mybpc1;Mybpc2;Mybph;Rac2;Rnd1;Rnd3;Sirpa;Tmsb10;Tpm3;Tpm4
GO:0007017	microtubule-based process	biological_process	cellular process	8	1755	35	19037	0.0126179	0.096654	2.47938	LOC100909441;Tuba1a;Tuba1b;Tubb1;Tubb2a;Tubb2b;Tubb3;Tubb5
GO:0007018	microtubule-based movement	biological_process	cellular process	23	1755	110	19037	0.000147418	0.00393088	2.26807	Cenpe;Kif11;Kif14;Kif15;Kif18a;Kif18b;Kif20a;Kif20b;Kif22;Kif23;Kif2c;Kif4a;Kif5c;Kifc1;Myh1;Myh10;Myh2;Myh3;Myh4;Myo10;Myo1f;Myo1g;Myo7a
GO:0007019	microtubule depolymerization	biological_process	cellular component organization or biogenesis|cellular process	5	1755	14	19037	0.0065185	0.0621893	3.87403	Kif14;Kif18a;Kif18b;Kif2c;Stmn4
GO:0007021	tubulin complex assembly	biological_process	cellular component organization or biogenesis|cellular process	1	1755	7	19037	0.491934	0.73204	1.54961	Cryab
GO:0007026	negative regulation of microtubule depolymerization	biological_process	biological regulation|cellular component organization or biogenesis|cellular process|negative regulation of biological process|regulation of biological process	4	1755	31	19037	0.319158	0.686015	1.39965	Ckap2;Clip2;Map1b;Nav3
GO:0007029	endoplasmic reticulum organization	biological_process	cellular component organization or biogenesis|cellular process	1	1755	32	19037	0.954845	0.983146	0.338978	Vmp1
GO:0007030	Golgi organization	biological_process	cellular component organization or biogenesis|cellular process	5	1755	94	19037	0.941843	0.974641	0.576984	Atp8b4;Cit;Surf4;Tmed3;Vmp1
GO:0007035	vacuolar acidification	biological_process	biological regulation|cellular process	2	1755	11	19037	0.269385	0.609577	1.97224	Clic4;Slc11a1
GO:0007040	lysosome organization	biological_process	cellular component organization or biogenesis|cellular process	2	1755	40	19037	0.894532	0.941683	0.542365	Clvs1;Myo7a
GO:0007041	lysosomal transport	biological_process	establishment of localization|localization	1	1755	9	19037	0.581326	0.772752	1.20525	Pcsk9
GO:0007043	cell-cell junction assembly	biological_process	cellular component organization or biogenesis|cellular process	3	1755	29	19037	0.508008	0.747392	1.12213	Cdh11;Cdh24;Fscn1
GO:0007044	cell-substrate junction assembly	biological_process	cellular component organization or biogenesis|cellular process	2	1755	5	19037	0.070352	0.280328	4.33892	Fn1;Itga5
GO:0007050	cell cycle arrest	biological_process	biological regulation|cellular process|negative regulation of biological process|regulation of biological process	12	1755	76	19037	0.0447397	0.22429	1.71273	Cdkn2b;Cdkn3;Cgref1;Ern2;Inhba;Mlf1;Prr11;Skil;Tgfb1;Tgfb2;Thbs1;Tp73
GO:0007051	spindle organization	biological_process	cellular component organization or biogenesis|cellular process	9	1755	20	19037	3.08587e-05	0.00116203	4.88128	Aspm;Aunip;Aurka;Aurkb;Cep72;Kif11;Knstrn;Rgs14;Spag5
GO:0007052	mitotic spindle organization	biological_process	cellular component organization or biogenesis|cellular process	9	1755	35	19037	0.00364658	0.0431585	2.7893	Aurka;Aurkb;Ccnb1;Cenpe;Kif4a;Ndc80;Nuf2;Spc25;Stil
GO:0007059	chromosome segregation	biological_process	cellular process	30	1755	68	19037	3.79226e-14	1.55893e-11	4.78557	Birc5;Brca1;Bub1;Cdca2;Cdt1;Cenpe;Cenpf;Cenpn;Cenpt;Cenpw;Esco2;Espl1;Hjurp;Incenp;Kif11;Knstrn;Mis18a;Ndc80;Nek2;Nek2l1;Nek6;Pmf1;Pttg1;Rgs14;Sgo1;Ska1;Ska2;Spag5;Spc25;Top2a
GO:0007062	sister chromatid cohesion	biological_process	cellular component organization or biogenesis|cellular process	1	1755	16	19037	0.787358	0.877748	0.677956	Kif22
GO:0007064	mitotic sister chromatid cohesion	biological_process	cellular component organization or biogenesis|cellular process	4	1755	13	19037	0.0261266	0.162116	3.33763	Cdc20;Cdca5;Gsg2;Pttg1
GO:0007076	mitotic chromosome condensation	biological_process	cellular component organization or biogenesis|cellular process	6	1755	13	19037	0.000590432	0.0110745	5.00644	Cdca5;Ncapd2;Ncapg;Nusap1;Smc2;Smc4
GO:0007080	mitotic metaphase plate congression	biological_process	cellular component organization or biogenesis|cellular process|establishment of localization|localization	10	1755	37	19037	0.00147535	0.021725	2.9317	Ccnb1;Cdca5;Cdca8;Cenpe;Cep55;Kif14;Kif18a;Kif22;Kif2c;Kifc1
GO:0007088	regulation of mitotic nuclear division	biological_process	biological regulation|cellular component organization or biogenesis|cellular process|regulation of biological process	5	1755	17	19037	0.0159617	0.114947	3.19038	Bora;Cenpe;Fbxo5;Kif20b;Mki67
GO:0007091	metaphase/anaphase transition of mitotic cell cycle	biological_process	biological regulation|cellular component organization or biogenesis|cellular process|regulation of biological process	3	1755	6	19037	0.0126377	0.096654	5.42365	Bub1b;Cit;Tacc3
GO:0007093	mitotic cell cycle checkpoint	biological_process	biological regulation|cellular process|negative regulation of biological process|regulation of biological process	6	1755	26	19037	0.0280341	0.170942	2.50322	Cdkn2b;Chek1;Kntc1;Mad2l1;Tgfb1;Zwilch
GO:0007094	mitotic spindle assembly checkpoint	biological_process	biological regulation|cellular component organization or biogenesis|cellular process|negative regulation of biological process|regulation of biological process	8	1755	21	19037	0.000348682	0.00699206	4.1323	Birc5;Bub1;Bub1b;Cenpe;Mad2l1;Plk1;Trip13;Ttk
GO:0007095	mitotic G2 DNA damage checkpoint	biological_process	biological regulation|cellular process|negative regulation of biological process|regulation of biological process|response to stimulus	6	1755	25	19037	0.0233324	0.148515	2.60335	Cdk1;Clspn;Fanci;Hmga2;Ier3;LOC100302465
GO:0007097	nuclear migration	biological_process	establishment of localization|localization	1	1755	14	19037	0.741937	0.853711	0.774807	Myh10
GO:0007098	centrosome cycle	biological_process	cellular component organization or biogenesis|cellular process	7	1755	36	19037	0.0434658	0.21857	2.1092	Aurka;Brca1;Fes;Haus4;LOC108348136;Ns5atp9;Plk1
GO:0007099	centriole replication	biological_process	cellular component organization or biogenesis|cellular process	2	1755	15	19037	0.408624	0.704458	1.44631	Cep72;Plk4
GO:0007100	mitotic centrosome separation	biological_process	cellular component organization or biogenesis|cellular process	2	1755	5	19037	0.070352	0.280328	4.33892	Aurka;Kif11
GO:0007127	meiosis I	biological_process	cellular component organization or biogenesis|cellular process|reproduction|reproductive process	4	1755	9	19037	0.00620695	0.0621893	4.82102	Cks2;Espl1;Rad51;Scimp
GO:0007129	synapsis	biological_process	cellular component organization or biogenesis|cellular process|reproduction|reproductive process	4	1755	30	19037	0.297609	0.660045	1.44631	Brip1;Ccdc36;Ccne1;Fancd2
GO:0007130	synaptonemal complex assembly	biological_process	cellular component organization or biogenesis|cellular process|reproduction|reproductive process	2	1755	22	19037	0.614978	0.789613	0.986118	Tex12;Trip13
GO:0007131	reciprocal meiotic recombination	biological_process	cellular component organization or biogenesis|cellular process|metabolic process|reproduction|reproductive process	4	1755	26	19037	0.214094	0.531251	1.66881	Chtf18;Rad51;Rad51c;Trip13
GO:0007140	male meiotic nuclear division	biological_process	cellular component organization or biogenesis|cellular process|multicellular organismal process|multi-organism process|reproduction|reproductive process	6	1755	32	19037	0.0690721	0.280328	2.03387	Chtf18;Fignl1;Kif18a;Rspo1;Sgo2;Suv39h2
GO:0007141	male meiosis I	biological_process	cellular component organization or biogenesis|cellular process|multicellular organismal process|multi-organism process|reproduction|reproductive process	3	1755	23	19037	0.357274	0.688406	1.41486	Mybl1;Rad51c;Trip13
GO:0007143	female meiotic nuclear division	biological_process	cellular component organization or biogenesis|cellular process|multicellular organismal process|multi-organism process|reproduction|reproductive process	2	1755	11	19037	0.269385	0.609577	1.97224	Ereg;Sgo2
GO:0007144	female meiosis I	biological_process	cellular component organization or biogenesis|cellular process|multicellular organismal process|multi-organism process|reproduction|reproductive process	1	1755	6	19037	0.440322	0.704458	1.80788	Trip13
GO:0007154	cell communication	biological_process	cellular process	5	1755	26	19037	0.0854528	0.320806	2.08602	Frem1;Gja1;Gja4;Gjb1;Lrrc15
GO:0007155	cell adhesion	biological_process	biological adhesion	58	1755	292	19037	1.55671e-08	1.8284e-06	2.1546	Acan;Adam9;Atp1b1;Cd44;Cercam;Cgref1;Cntn5;Col12a1;Col15a1;Col16a1;Col18a1;Col5a1;Ctgf;Cx3cr1;Cyp1b1;Cyr61;Dpp4;Emilin1;Fes;Fn1;Folr2;Gpnmb;Hapln3;Has1;Icam1;Itga4;Itga5;Itgam;Itgav;Itgb1;Itgb2;Lamc1;Lgals3bp;Mfge8;Mog;Muc1;Mybpc1;Mybph;Myh10;Ncam1;Nov;Nrxn3;Ntm;Parvg;Postn;Selp;Spon1;Spp1;Sulf1;Thbs2;Thbs4;Tnc;Tnfaip6;Tnfrsf12a;Vcan;Vwf;Wisp1;Wisp2
GO:0007156	homophilic cell adhesion via plasma membrane adhesion molecules	biological_process	biological adhesion	9	1755	120	19037	0.787258	0.877748	0.813547	Cdh11;Cdh24;Cdhr1;Dsc3;Dsg3;Ncr3;PVR;Ret;Robo2
GO:0007157	heterophilic cell-cell adhesion via plasma membrane cell adhesion molecules	biological_process	biological adhesion	11	1755	53	19037	0.00802983	0.0709877	2.25133	Crb2;Cxadr;Grid2;Itga4;Itga5;Itgal;Jaml;Lgals7;Ncr3;PVR;Selp
GO:0007158	neuron cell-cell adhesion	biological_process	biological adhesion	1	1755	9	19037	0.581326	0.772752	1.20525	Ret
GO:0007159	leukocyte cell-cell adhesion	biological_process	biological adhesion	14	1755	27	19037	1.92485e-08	2.03489e-06	5.62452	Ccl5;Fermt3;Icam1;Itga4;Itga5;Itgal;Itgam;Itgb1;Itgb2;Msn;Olr1;Ptprc;Selp;Syk
GO:0007160	cell-matrix adhesion	biological_process	biological adhesion	21	1755	79	19037	6.33178e-06	0.000315502	2.88346	Adam9;Adamts12;Col3a1;Ctgf;Emilin1;Fgg;Fn1;Frem1;Itga10;Itga2;Itga4;Itga8;Itgal;Itgav;Itgb1;Itgb2;Msln;Muc4;Nid1;Sirpa;Tnn
GO:0007162	negative regulation of cell adhesion	biological_process	biological adhesion|biological regulation|cellular process|negative regulation of biological process|regulation of biological process	9	1755	49	19037	0.0331934	0.187564	1.99236	Cfl1;Hspg2;Lamb1;Mmp2;Myo1f;Plxnc1;Rnd1;Spn;Tnc
GO:0007163	establishment or maintenance of cell polarity	biological_process	cellular process	5	1755	45	19037	0.401449	0.704458	1.20525	Fscn1;Parvg;Rnd1;Rnd3;Snap91
GO:0007165	signal transduction	biological_process	biological regulation|cellular process|regulation of biological process|response to stimulus|signaling	71	1755	697	19037	0.200938	0.507839	1.10496	Adcy2;Adcy7;Anxa1;Arhgap11a;Arhgap15;Arhgap19;Arhgap25;Arhgap9;Bcl11b;Card11;Cd300a;Cd74;Cd80;Chrna4;Ctgf;Cxcr2;Cyr61;Depdc1;Depdc1b;Ect2;Fas;Fcer1a;Fcer1g;Fgg;Fyb;Gabrb3;Gabrp;Gja1;Glra1;Gnb4;Gpnmb;Grb14;Grem1;Hmga2;Hsh2d;Igfbp2;Krt17;Lgals1;Litaf;LOC100910669;Lrr1;Lrrc8c;Ltb4r;Ltb4r2;Myo10;Nfam1;Nos2;Nov;Olr59;Olr63;P2rx4;Pdcd1lg2;Pdgfrb;Pirb;Plpp1;Plpp4;Rasl11b;Rcan1;Rin3;Rtkn2;Sectm1a;Sectm1b…
GO:0007166	cell surface receptor signaling pathway	biological_process	biological regulation|cellular process|regulation of biological process|response to stimulus|signaling	29	1755	173	19037	0.00114207	0.0175347	1.81833	Adgre1;Adgre4;Adgrg5;Adgrl2;Anxa1;Cd101;Cd247;Cd37;Cd3e;Cd53;Cd80;Cxcl13;Cxcr2;Edn1;Fcer1a;Fcer1g;Fcgr1a;Itgal;Lck;Ncam1;Pdcd1lg2;Prokr1;Prokr2;RGD1565355;Rtn4rl2;Spn;Syk;Tnfrsf1b;Tspan11
GO:0007167	enzyme linked receptor protein signaling pathway	biological_process	biological regulation|cellular process|regulation of biological process|response to stimulus|signaling	3	1755	8	19037	0.0307483	0.178239	4.06774	Axl;Jak3;Syk
GO:0007169	transmembrane receptor protein tyrosine kinase signaling pathway	biological_process	biological regulation|cellular process|regulation of biological process|response to stimulus|signaling	28	1755	101	19037	7.31184e-08	6.67951e-06	3.00717	Bdnf;Btk;Cass4;Csf1r;Ephb2;Fes;Fgr;Grap;Hck;Insrr;Jak3;Lck;LOC100910669;LOC108348155;LOC680910;LOC685048;Lyn;Matk;Met;Nedd9;Ngf;Nrg1;Ret;RGD1561143;RGD1563400;Sla;Stap1;Syk
GO:0007171	activation of transmembrane receptor protein tyrosine kinase activity	biological_process	biological regulation|cellular component organization or biogenesis|cellular process|metabolic process|positive regulation of biological process|regulation of biological process|response to stimulus|signaling	4	1755	9	19037	0.00620695	0.0621893	4.82102	Angpt4;Grem1;Ngf;Nrg1
GO:0007173	epidermal growth factor receptor signaling pathway	biological_process	biological regulation|cellular process|regulation of biological process|response to stimulus|signaling	7	1755	46	19037	0.126856	0.394341	1.65068	Areg;Arf4;Epgn;Ereg;Fes;Hbegf;Tgfb1
GO:0007175	negative regulation of epidermal growth factor-activated receptor activity	biological_process	biological regulation|cellular process|metabolic process|negative regulation of biological process|regulation of biological process|response to stimulus|signaling	1	1755	14	19037	0.741937	0.853711	0.774807	Gprc5a
GO:0007178	transmembrane receptor protein serine/threonine kinase signaling pathway	biological_process	biological regulation|cellular process|regulation of biological process|response to stimulus|signaling	3	1755	15	19037	0.154716	0.444764	2.16946	Akap2;Bmpr1b;Gdf5
GO:0007179	transforming growth factor beta receptor signaling pathway	biological_process	biological regulation|cellular process|regulation of biological process|response to stimulus|signaling	11	1755	69	19037	0.0501211	0.244557	1.72928	Adam9;Ccl2;Col1a2;Col3a1;Eng;Itgb1;Ltbp2;Skil;Tgfb1;Tgfb2;Tgfb3
GO:0007182	common-partner SMAD protein phosphorylation	biological_process	biological regulation|cellular process|metabolic process|regulation of biological process|response to stimulus|signaling	1	1755	6	19037	0.440322	0.704458	1.80788	Tgfb1
GO:0007183	SMAD protein complex assembly	biological_process	biological regulation|cellular component organization or biogenesis|cellular process|regulation of biological process|response to stimulus|signaling	1	1755	8	19037	0.53879	0.748901	1.35591	Tgfb1
GO:0007186	G-protein coupled receptor signaling pathway	biological_process	biological regulation|cellular process|regulation of biological process|response to stimulus|signaling	90	1755	1972	19037	1	1	0.495059	Adgre1;Adgre4;Adgrg5;Adgrl2;Adora1;Adora2a;Adra2b;Aplnr;Apoc3;Areg;Bdkrb1;C3ar1;Ccl12;Ccl17;Ccl2;Ccl22;Ccl5;Ccl7;Ccl9;Ccr1l1;Ccr3;Ccr4;Ccr5;Ccr7;Cmklr1;Cnr2;Cx3cr1;Cxcl1;Cxcl10;Cxcl11;Cxcl13;Cxcl2;Cxcl3;Cxcl6;Cxcl9;Cxcr2;Cxcr4;Drd1;Edn1;Ednrb;F2r;F2rl1;Fcnb;Ffar2;Ffar4;Fpr1;Gng2;Gng4;Gngt2;Gpbar1;Gpr141;Gpr15;Gpr153;Gpr174;Gpr176;Gpr183;Gpr3;Gpr34;Gpr65;Gprc5a;Grpr;Hrh1;Htr2a;LOC290595;Mrgpre;Mrg…
GO:0007187	G-protein coupled receptor signaling pathway, coupled to cyclic nucleotide second messenger	biological_process	biological regulation|cellular process|regulation of biological process|response to stimulus|signaling	4	1755	45	19037	0.605715	0.789613	0.964204	Anxa1;Drd1;Htr2a;Htr7
GO:0007188	adenylate cyclase-modulating G-protein coupled receptor signaling pathway	biological_process	biological regulation|cellular process|regulation of biological process|response to stimulus|signaling	8	1755	66	19037	0.261035	0.608547	1.31482	Adcy2;Adra1d;Adra2b;Cysltr2;Gpr84;Ltb4r;Ltb4r2;Tsku
GO:0007189	adenylate cyclase-activating G-protein coupled receptor signaling pathway	biological_process	biological regulation|cellular process|regulation of biological process|response to stimulus|signaling	11	1755	73	19037	0.0701963	0.280328	1.63452	Adcy2;Adcy7;Adora2a;Drd1;Gpr65;Mc1r;Nme2;Ptgfr;Ptgir;Pthlh;Ramp3
GO:0007190	activation of adenylate cyclase activity	biological_process	biological regulation|cellular process|metabolic process|positive regulation of biological process|regulation of biological process	1	1755	16	19037	0.787358	0.877748	0.677956	Drd1
GO:0007191	adenylate cyclase-activating dopamine receptor signaling pathway	biological_process	biological regulation|cellular process|regulation of biological process|response to stimulus|signaling	1	1755	9	19037	0.581326	0.772752	1.20525	Drd1
GO:0007193	adenylate cyclase-inhibiting G-protein coupled receptor signaling pathway	biological_process	biological regulation|cellular process|regulation of biological process|response to stimulus|signaling	4	1755	47	19037	0.640526	0.808318	0.923174	Adora1;Edn1;Ednra;Gpr176
GO:0007194	negative regulation of adenylate cyclase activity	biological_process	biological regulation|cellular process|metabolic process|negative regulation of biological process|regulation of biological process	2	1755	24	19037	0.662814	0.815174	0.903941	Adra1d;P2ry13
GO:0007195	adenylate cyclase-inhibiting dopamine receptor signaling pathway	biological_process	biological regulation|cellular process|regulation of biological process|response to stimulus|signaling	1	1755	13	19037	0.715711	0.839021	0.834407	Adra1d
GO:0007197	adenylate cyclase-inhibiting G-protein coupled acetylcholine receptor signaling pathway	biological_process	biological regulation|cellular process|regulation of biological process|response to stimulus|signaling	1	1755	6	19037	0.440322	0.704458	1.80788	Hrh1
GO:0007198	adenylate cyclase-inhibiting serotonin receptor signaling pathway	biological_process	biological regulation|cellular process|regulation of biological process|response to stimulus|signaling	1	1755	5	19037	0.38347	0.688406	2.16946	Htr7
GO:0007200	phospholipase C-activating G-protein coupled receptor signaling pathway	biological_process	biological regulation|cellular process|regulation of biological process|response to stimulus|signaling	16	1755	61	19037	9.3271e-05	0.00281508	2.84519	Adra1d;C3ar1;C5ar1;Cxcr2;Cysltr2;Ednrb;F2r;Fpr1;Gng13;Gpr84;Grpr;Hrh1;Htr2a;Ltb4r;Ltb4r2;Ntsr2
GO:0007202	activation of phospholipase C activity	biological_process	biological regulation	1	1755	18	19037	0.824788	0.899354	0.602627	Htr2a
GO:0007204	positive regulation of cytosolic calcium ion concentration	biological_process	biological regulation|cellular process	27	1755	158	19037	0.00123925	0.0188099	1.85365	Adra1d;C3ar1;C5ar1;Cav3;Ccr5;Cd38;Cd55;Cxcl1;Cxcl13;Cxcl2;Cxcl3;Cxcr2;Edn1;Ednra;Ednrb;F2r;F2rl1;Fpr1;Gja1;Gpr3;Htr2a;Il1b;Itgav;Jak3;Pik3cg;Ptgfr;Ptgir
GO:0007205	protein kinase C-activating G-protein coupled receptor signaling pathway	biological_process	biological regulation|cellular process|regulation of biological process|response to stimulus|signaling	5	1755	28	19037	0.10993	0.361523	1.93702	Adora2a;Bdkrb1;Edn1;Ednra;F2r
GO:0007210	serotonin receptor signaling pathway	biological_process	biological regulation|cellular process|regulation of biological process|response to stimulus|signaling	2	1755	6	19037	0.0992091	0.333151	3.61576	Htr2a;Htr7
GO:0007212	dopamine receptor signaling pathway	biological_process	biological regulation|cellular process|regulation of biological process|response to stimulus|signaling	1	1755	18	19037	0.824788	0.899354	0.602627	Drd1
GO:0007213	G-protein coupled acetylcholine receptor signaling pathway	biological_process	biological regulation|cellular process|regulation of biological process|response to stimulus|signaling	2	1755	9	19037	0.198499	0.505521	2.41051	Plcb1;Rgs8
GO:0007214	gamma-aminobutyric acid signaling pathway	biological_process	biological regulation|cellular process|regulation of biological process|response to stimulus|signaling	2	1755	26	19037	0.705744	0.839021	0.834407	Bdnf;Gabrb3
GO:0007215	glutamate receptor signaling pathway	biological_process	biological regulation|cellular process|regulation of biological process|response to stimulus|signaling	1	1755	7	19037	0.491934	0.73204	1.54961	Plcb1
GO:0007217	tachykinin receptor signaling pathway	biological_process	biological regulation|cellular process|regulation of biological process|response to stimulus|signaling	1	1755	8	19037	0.53879	0.748901	1.35591	Tac3
GO:0007218	neuropeptide signaling pathway	biological_process	biological regulation|cellular process|regulation of biological process|response to stimulus|signaling	18	1755	100	19037	0.00429966	0.0485609	1.95251	Cysltr2;Ecel1;Glra1;Gpr83;Gpr84;Gpr88;Grpr;Ltb4r;Ltb4r2;Mrgprx3;Npy4r;Ntsr2;Penk;Prok2;Prokr1;Prokr2;Scg5;Tac3
GO:0007219	Notch signaling pathway	biological_process	biological regulation|cellular process|regulation of biological process|response to stimulus|signaling	8	1755	104	19037	0.753715	0.863865	0.834407	Angpt4;Chac1;Foxc2;Heyl;Il2ra;Ripply1;Tgfb1;Tmem100
GO:0007224	smoothened signaling pathway	biological_process	biological regulation|cellular process|regulation of biological process|response to stimulus|signaling	2	1755	72	19037	0.99222	1	0.301314	Hspg2;Stil
GO:0007229	integrin-mediated signaling pathway	biological_process	biological regulation|cellular process|regulation of biological process|response to stimulus|signaling	25	1755	89	19037	2.73869e-07	2.08865e-05	3.04699	Adamts1;Adamts3;Adamts9;Col3a1;Ctgf;Fcer1g;Fermt3;Fgr;Itga10;Itga2;Itga4;Itga5;Itga8;Itgal;Itgam;Itgav;Itgax;Itgb1;Itgb2;Nme2;Plek;Syk;Thy1;Tyrobp;Vav1
GO:0007249	I-kappaB kinase/NF-kappaB signaling	biological_process	biological regulation|cellular process|regulation of biological process|response to stimulus|signaling	7	1755	36	19037	0.0434658	0.21857	2.1092	Bcl3;Btk;Card11;Ripk3;Tifab;Tlr8;Tlr9
GO:0007250	activation of NF-kappaB-inducing kinase activity	biological_process	biological regulation|cellular process|metabolic process|positive regulation of biological process|regulation of biological process|response to stimulus|signaling	1	1755	16	19037	0.787358	0.877748	0.677956	Chi3l1
GO:0007252	I-kappaB phosphorylation	biological_process	biological regulation|cellular process|metabolic process|regulation of biological process|response to stimulus|signaling	3	1755	13	19037	0.111292	0.362139	2.50322	Tlr2;Tlr7;Tlr9
GO:0007254	JNK cascade	biological_process	biological regulation|cellular process|metabolic process|regulation of biological process|response to stimulus|signaling	1	1755	33	19037	0.959015	0.98594	0.328706	Mapk10
GO:0007257	activation of JUN kinase activity	biological_process	biological regulation|cellular process|metabolic process|positive regulation of biological process|regulation of biological process|response to stimulus|signaling	4	1755	34	19037	0.384184	0.688406	1.27615	Ern2;Fcer1a;Mdfi;Syk
GO:0007258	JUN phosphorylation	biological_process	biological regulation|cellular process|metabolic process|regulation of biological process|response to stimulus|signaling	1	1755	5	19037	0.38347	0.688406	2.16946	Mapk10
GO:0007259	JAK-STAT cascade	biological_process	biological regulation|cellular process|regulation of biological process|response to stimulus|signaling	1	1755	22	19037	0.88105	0.932065	0.493059	Socs3
GO:0007260	tyrosine phosphorylation of STAT protein	biological_process	biological regulation|cellular process|metabolic process|regulation of biological process|response to stimulus|signaling	2	1755	9	19037	0.198499	0.505521	2.41051	Jak3;Lif
GO:0007263	nitric oxide mediated signal transduction	biological_process	biological regulation|cellular process|regulation of biological process|response to stimulus|signaling	2	1755	15	19037	0.408624	0.704458	1.44631	Ndnf;Nos2
GO:0007264	small GTPase mediated signal transduction	biological_process	biological regulation|cellular process|regulation of biological process|response to stimulus|signaling	9	1755	87	19037	0.410313	0.704458	1.12213	Arhgap30;Hmox1;Pak1;Rac2;Rasgrf1;Rasgrp4;Rnd1;Rnd3;Vav1
GO:0007265	Ras protein signal transduction	biological_process	biological regulation|cellular process|regulation of biological process|response to stimulus|signaling	4	1755	51	19037	0.70387	0.839021	0.850768	Ccna2;Dok3;Iqgap3;Rras2
GO:0007266	Rho protein signal transduction	biological_process	biological regulation|cellular process|regulation of biological process|response to stimulus|signaling	8	1755	74	19037	0.373268	0.688406	1.17268	Cdc42ep1;Col1a2;Ednra;Pak1;Rac2;Rnd1;Rnd3;Was
GO:0007267	cell-cell signaling	biological_process	cellular process|signaling	28	1755	141	19037	7.79296e-05	0.00246427	2.15407	Adra1d;Adra2b;Bdnf;Ccl12;Ccl5;Ccr5;Ctgf;Cxcl13;Cyr61;Edn1;Ereg;Fgf9;Fgfbp1;Fjx1;Gata4;Gja1;Gja4;Gjb2;Gpnmb;Grem1;Hmmr;Nfe2;Ngf;Nov;Thy1;Tnfsf18;Wisp1;Wisp2
GO:0007268	chemical synaptic transmission	biological_process	cellular process|signaling	18	1755	218	19037	0.722923	0.846608	0.895648	Chrna4;Gabrb3;Gabrp;Glra1;Gpr88;Hrh1;Htr2a;Htr7;Lrp8;Met;Npy4r;Nrxn3;Penk;Prokr1;Prokr2;Snap91;Sv2c;Syt10
GO:0007269	neurotransmitter secretion	biological_process	biological regulation|cellular process|establishment of localization|localization|signaling	2	1755	34	19037	0.834112	0.907916	0.638076	Nrxn3;Snap91
GO:0007271	synaptic transmission, cholinergic	biological_process	cellular process|signaling	4	1755	26	19037	0.214094	0.531251	1.66881	Adora2a;Chrna4;Lynx1;Slc5a7
GO:0007274	neuromuscular synaptic transmission	biological_process	cellular process|signaling	3	1755	34	19037	0.618207	0.789613	0.957114	Chrna4;Egr3;Slc5a7
GO:0007275	multicellular organism development	biological_process	developmental process|multicellular organismal process	34	1755	312	19037	0.173935	0.473522	1.18208	Axl;Bcl11b;Cd40;Cdh11;Cdh24;Csf1r;Ephb2;Eya2;Fas;Gadd45g;Gatm;Hells;Hemgn;Hist1h2ao;Hist2h4;Hist2h4a;Igfbp2;Insrr;Met;Pax8;Pdgfrb;Relt;Ret;Ripk3;Sfrp4;Spred3;Tmeff1;Tnfrsf10b;Tnfrsf11b;Tnfrsf18;Tnfrsf1b;Tnfrsf8;Tnfrsf9;Wif1
GO:0007276	gamete generation	biological_process	multicellular organismal process|multi-organism process|reproduction|reproductive process	2	1755	21	19037	0.589171	0.779191	1.03308	Fancd2;Fst
GO:0007281	germ cell development	biological_process	cellular process|developmental process|multicellular organismal process|multi-organism process|reproduction|reproductive process	3	1755	39	19037	0.710371	0.839021	0.834407	Cxcr4;Prdm1;Wt1
GO:0007283	spermatogenesis	biological_process	multicellular organismal process|multi-organism process|reproduction|reproductive process	48	1755	375	19037	0.0124726	0.096654	1.38845	Aspm;Axl;Bard1;Brip1;Calr;Ccdc36;Ccnb1;Ccnyl1;Cd55;Cdc25c;Chtf18;Cit;Creb3l4;Dbn1;Diaph3;E2f1;Fas;Fdps;Foxj1;Fstl3;Gata4;Ggt1;H2afx;Hist1h1a;Hmga2;Hmgb2;Il1a;Inhbb;Kifc1;Mns1;Mybl1;Pcyt1b;Pgm3;Plau;Plaur;Prnd;Prok2;Racgap1;Rad18;Rad51c;Rai14;RGD1310335;S100a11;Skil;Tcfl5;Tmem119;Trip13;Wt1
GO:0007286	spermatid development	biological_process	cellular process|developmental process|multicellular organismal process|multi-organism process|reproduction|reproductive process	6	1755	107	19037	0.93726	0.971937	0.608259	Brip1;Ddias;LOC100364435;Ran;Tmsb10;Trip13
GO:0007289	spermatid nucleus differentiation	biological_process	cellular component organization or biogenesis|cellular process|developmental process|multicellular organismal process|multi-organism process|reproduction|reproductive process	1	1755	8	19037	0.53879	0.748901	1.35591	Hmgb2
GO:0007292	female gamete generation	biological_process	multicellular organismal process|multi-organism process|reproduction|reproductive process	1	1755	6	19037	0.440322	0.704458	1.80788	Mcm8
GO:0007338	single fertilization	biological_process	multi-organism process|reproduction|reproductive process	5	1755	49	19037	0.475991	0.73204	1.10687	C4bpa;Fetub;Mfge8;Prnd;Wt1
GO:0007339	binding of sperm to zona pellucida	biological_process	cellular process|multi-organism process|reproduction|reproductive process	2	1755	37	19037	0.867453	0.925897	0.58634	C4bpa;Fetub
GO:0007340	acrosome reaction	biological_process	multi-organism process|reproduction|reproductive process	2	1755	14	19037	0.37477	0.688406	1.54961	Glra1;Prnd
GO:0007342	fusion of sperm to egg plasma membrane involved in single fertilization	biological_process	cellular component organization or biogenesis|cellular process|multicellular organismal process|multi-organism process|reproduction|reproductive process	1	1755	15	19037	0.765745	0.867375	0.723153	Folr2
GO:0007346	regulation of mitotic cell cycle	biological_process	biological regulation|cellular process|regulation of biological process	11	1755	90	19037	0.205189	0.514066	1.32578	Birc5;Cdk1;Cks1b;Cks2;Fbxo5;Map2k3;Nek6;Pak1;Plk1;Rbl1;Tp73
GO:0007368	determination of left/right symmetry	biological_process	developmental process|multicellular organismal process	8	1755	81	19037	0.473977	0.73204	1.07134	Bicc1;Dnaaf3;Foxj1;Pcsk5;Pcsk6;Pkd1l1;Stil;Zic3
GO:0007369	gastrulation	biological_process	developmental process|multicellular organismal process	5	1755	33	19037	0.183506	0.488787	1.64353	Apln;Aplnr;Ext1;Nr4a3;Txnrd1
GO:0007389	pattern specification process	biological_process	developmental process|multicellular organismal process	2	1755	55	19037	0.967935	0.991668	0.394447	Fst;Zic3
GO:0007399	nervous system development	biological_process	developmental process|multicellular organismal process	21	1755	210	19037	0.380985	0.688406	1.08473	Bdnf;Bhlhe40;Dbn1;Dpysl3;Fgf18;Gap43;Gdnf;Grip1;Hbegf;Hmgb2;Igf1;Itm2a;Map1b;Nrg1;Ptpro;Ret;Scn3b;Sh2b2;Slc7a5;Thbs4;Zc3h12a
GO:0007405	neuroblast proliferation	biological_process	cellular process|developmental process|multicellular organismal process	1	1755	20	19037	0.855633	0.919372	0.542365	Racgap1
GO:0007406	negative regulation of neuroblast proliferation	biological_process	biological regulation|cellular process|developmental process|multicellular organismal process|negative regulation of biological process|regulation of biological process	2	1755	8	19037	0.163948	0.448809	2.71182	Bdnf;Tgfb1
GO:0007409	axonogenesis	biological_process	cellular component organization or biogenesis|cellular process|developmental process|multicellular organismal process	11	1755	121	19037	0.565502	0.772752	0.986118	Bcl11b;Map1b;Myh10;Ndn;Picalm;Slit2;Slit3;Slitrk4;Snap91;Tlr9;Tnn
GO:0007411	axon guidance	biological_process	cellular component organization or biogenesis|cellular process|developmental process|locomotion|multicellular organismal process|response to stimulus	20	1755	140	19037	0.0323002	0.183568	1.54961	Bdnf;Crmp1;Csf1r;Enah;Ephb2;Ext1;Gap43;Gbx2;Kif5c;Myh10;Nr4a3;Ptpro;Robo2;Runx3;Slit2;Slit3;Tgfb2;Tnfrsf8;Tubb3;Unc5a
GO:0007413	axonal fasciculation	biological_process	cellular component organization or biogenesis|cellular process|developmental process|multicellular organismal process	3	1755	20	19037	0.278781	0.625387	1.62709	Ephb2;Ncam1;Ndn
GO:0007416	synapse assembly	biological_process	cellular component organization or biogenesis|cellular process|developmental process|multicellular organismal process	6	1755	70	19037	0.634894	0.806783	0.929768	Bdnf;Drd1;Erc2;Map1b;Nrg1;Nrxn3
GO:0007417	central nervous system development	biological_process	developmental process|multicellular organismal process	8	1755	103	19037	0.744107	0.854243	0.842508	Acan;Areg;Arnt2;Hapln3;Ndn;Pax8;Vcan;Vsnl1
GO:0007420	brain development	biological_process	developmental process|multicellular organismal process	36	1755	318	19037	0.115244	0.374013	1.228	Abcb1b;Adgrl2;Arf4;Arnt2;Aspm;Bak1;Brca1;C1qb;Ckmt1b;Col4a1;Cxcr4;Dbi;Dbn1;Emx2;Eomes;Ext1;Foxj1;H2afy2;Hmgcs1;Hspg2;Itga8;Mdga1;Met;Myh10;Nrg1;Plcb1;RGD1309108;Robo2;Slc17a6;Slc7a11;Slit2;Slit3;Sphk1;Tmem132a;Top2a;Tpm3
GO:0007422	peripheral nervous system development	biological_process	developmental process|multicellular organismal process	6	1755	25	19037	0.0233324	0.148515	2.60335	Bdnf;Ednrb;Egr3;Gdnf;Ngf;Nrg1
GO:0007435	salivary gland morphogenesis	biological_process	developmental process|multicellular organismal process	3	1755	11	19037	0.0735992	0.284534	2.95835	Tgfb1;Tgfb2;Tgfb3
GO:0007492	endoderm development	biological_process	developmental process	4	1755	33	19037	0.362516	0.688406	1.31482	Ext1;Pax9;Pthlh;Tgfb1
GO:0007494	midgut development	biological_process	developmental process|multicellular organismal process	3	1755	19	19037	0.252891	0.592923	1.71273	Aldh1a2;Reg1a;Reg3b
GO:0007498	mesoderm development	biological_process	developmental process	2	1755	23	19037	0.639521	0.808083	0.943243	Ext1;Snai1
GO:0007507	heart development	biological_process	developmental process|multicellular organismal process	42	1755	297	19037	0.00346959	0.0415424	1.53396	Acan;Adam19;Adamts6;Alpk3;Aplnr;Bicc1;Ckmt2;Col3a1;Cxadr;Dnaaf3;Edn1;Ednra;Eng;Fbn1;Foxc2;Foxj1;Gata4;Gja1;Gja5;Ifitm1;Il1a;Itga4;Lox;Map2k3;Mmp2;Mmp9;Myh10;Nrg1;Pcsk5;Pdlim5;Pkd1l1;Ptk7;Ripply3;Sh3pxd2b;Sox18;Sparc;Stra6;Tgfb1;Tgfb2;Vcan;Wt1;Xirp2
GO:0007512	adult heart development	biological_process	developmental process|multicellular organismal process	3	1755	17	19037	0.202394	0.507839	1.91423	Aplnr;Gja1;Myh10
GO:0007517	muscle organ development	biological_process	developmental process|multicellular organismal process	5	1755	45	19037	0.401449	0.704458	1.20525	Cryab;Hist1h1b;Met;Nrg1;Sgcg
GO:0007519	skeletal muscle tissue development	biological_process	developmental process|multicellular organismal process	9	1755	68	19037	0.171728	0.468548	1.43567	Cfl2;Ckmt1b;Ckmt2;Csf1r;Eln;Met;Rcan1;Skil;Tgfb2
GO:0007520	myoblast fusion	biological_process	cellular process|developmental process	1	1755	22	19037	0.88105	0.932065	0.493059	Cav3
GO:0007528	neuromuscular junction development	biological_process	cellular component organization or biogenesis|cellular process	3	1755	37	19037	0.675733	0.824954	0.87951	Col4a1;Pak1;Tnc
GO:0007530	sex determination	biological_process	developmental process|reproduction|reproductive process	1	1755	7	19037	0.491934	0.73204	1.54961	Wt1
GO:0007565	female pregnancy	biological_process	multicellular organismal process|multi-organism process|reproduction|reproductive process	19	1755	137	19037	0.0469029	0.23091	1.50437	Adra2b;Arg1;Cd38;Gjb2;Igf1;Igfbp2;Itga2;Lgals9;Mmp2;Muc1;Pappa;Reg3b;Sfrp4;Slc2a1;Sphk1;Tgfb1;Tgfb2;Tgfb3;Ucp2
GO:0007566	embryo implantation	biological_process	developmental process|multicellular organismal process|multi-organism process|reproduction|reproductive process	14	1755	52	19037	0.000186773	0.0046122	2.92043	Hspg2;Irg1;Lamb1;Lif;Mmp2;Mmp9;Ooep;Pcsk5;Plau;Ptgis;Ptgs2;Stc2;Tead4;Vmp1
GO:0007567	parturition	biological_process	multicellular organismal process|multi-organism process|reproduction|reproductive process	3	1755	11	19037	0.0735992	0.284534	2.95835	Mmp2;Mmp9;Ptafr
GO:0007568	aging	biological_process	developmental process	62	1755	323	19037	1.93877e-08	2.03489e-06	2.08214	Adra1d;Arg1;Aurkb;Bak1;Bcl2a1;Bdnf;C1qb;Casp12;Ccl2;Ccl5;Ccr5;Cdkn2b;Cftr;Ciita;Col3a1;Col4a2;Cryab;Ctgf;Cyp27b1;Dbn1;Ednra;Ednrb;Eln;F3;Fas;Ggt1;Gjb2;Gsta2;Htr2a;Igf1;Igfbp2;Il10;Il6;Itgb2;Krt14;Lck;Ldlr;Litaf;Mmp2;Mmp7;Mmp9;Mog;Ncam1;Ncf2;Ngf;Nos2;Nox4;Nqo1;Pdgfrb;Penk;Ptgs2;Socs3;Tfrc;Tgfb1;Tgfb2;Tgfb3;Timp1;Tnfrsf1b;Top2a;Tyms;Ucp2;Vim
GO:0007569	cell aging	biological_process	cellular process|developmental process	4	1755	34	19037	0.384184	0.688406	1.27615	Cdk1;Icam1;Met;Nox4
GO:0007584	response to nutrient	biological_process	response to stimulus	21	1755	132	19037	0.00936565	0.0801	1.72571	Apoc3;Brca1;C2;Cd3e;Col1a1;Ctrb1;Cybb;Cyp11b2;Cyp1b1;Gatm;Havcr1;Igf1;Igfbp2;Il1b;Ldha;Lipg;Mgp;Mmp9;Nqo1;Tfrc;Tnfrsf11b
GO:0007585	respiratory gaseous exchange	biological_process	multicellular organismal process	6	1755	24	19037	0.0191901	0.134142	2.71182	Ccbe1;Chrna4;Chst11;Edn1;Ednra;Ndn
GO:0007586	digestion	biological_process	multicellular organismal process	1	1755	27	19037	0.926707	0.964236	0.401752	Ctrb1
GO:0007588	excretion	biological_process	multicellular organismal process	1	1755	16	19037	0.787358	0.877748	0.677956	Kirrel
GO:0007589	body fluid secretion	biological_process	biological regulation|establishment of localization|localization	2	1755	6	19037	0.0992091	0.333151	3.61576	Anxa2;Edn1
GO:0007595	lactation	biological_process	biological regulation|developmental process|establishment of localization|localization|multicellular organismal process	4	1755	60	19037	0.815781	0.897818	0.723153	Abcb1b;Cyp27b1;Met;Muc4
GO:0007596	blood coagulation	biological_process	biological regulation|multicellular organismal process|response to stimulus	11	1755	67	19037	0.0417123	0.217503	1.7809	C3;F10;F2r;F2rl1;F2rl2;F3;F5;Papss2;Procr;Tfpi2;Vwf
GO:0007599	hemostasis	biological_process	biological regulation	1	1755	5	19037	0.38347	0.688406	2.16946	Vwf
GO:0007601	visual perception	biological_process	multicellular organismal process	8	1755	111	19037	0.813832	0.895923	0.781787	Col11a1;Col1a1;Glra1;Lrat;Myo7a;Olfm2;Pdc;Rlbp1
GO:0007602	phototransduction	biological_process	biological regulation|cellular process|regulation of biological process|response to stimulus|signaling	1	1755	19	19037	0.840956	0.910743	0.57091	Opn3
GO:0007605	sensory perception of sound	biological_process	multicellular organismal process	14	1755	135	19037	0.362905	0.688406	1.1249	Birc5;Cemip;Cntn5;Coch;Col11a1;Col1a1;Espnl;Gabrb3;Gjb2;Icam1;Myo7a;Slc52a3;Tmie;Tub
GO:0007608	sensory perception of smell	biological_process	multicellular organismal process	2	1755	613	19037	1	1	0.0353908	Gstm1;Syt10
GO:0007610	behavior	biological_process	NA	2	1755	21	19037	0.589171	0.779191	1.03308	Adra1d;Adra2b
GO:0007611	learning or memory	biological_process	multicellular organismal process	12	1755	67	19037	0.0184712	0.131295	1.9428	Bdnf;Dbi;Egr1;Egr2;Ephb2;Gatm;Grpr;Il18;Il1b;Ncam1;Picalm;Ttbk1
GO:0007612	learning	biological_process	multicellular organismal process	12	1755	69	19037	0.0229227	0.146854	1.88649	Amph;Arf4;Bdnf;Chst10;Drd1;Ephb2;Nrxn3;Plcb1;Ptgs2;Rgs14;Stra6;Tlr2
GO:0007613	memory	biological_process	multicellular organismal process	16	1755	99	19037	0.0186893	0.132654	1.7531	Atp1a3;Bdnf;Cx3cr1;Drd1;Fen1;Hrh1;Htr2a;Htr7;Igf1;Il1b;Itga5;Itga8;Ngf;Nrg1;Plcb1;Ptgs2
GO:0007614	short-term memory	biological_process	multicellular organismal process	1	1755	13	19037	0.715711	0.839021	0.834407	Rcan1
GO:0007616	long-term memory	biological_process	multicellular organismal process	5	1755	40	19037	0.307144	0.662502	1.35591	Chst10;Egr1;Ldlr;Lrrn4;Rgs14
GO:0007617	mating behavior	biological_process	multicellular organismal process|multi-organism process|reproduction|reproductive process	1	1755	9	19037	0.581326	0.772752	1.20525	Drd1
GO:0007623	circadian rhythm	biological_process	rhythmic process	19	1755	123	19037	0.0174537	0.125144	1.6756	Arntl2;Bdnf;Bhlhe40;Egr1;Fas;Htr7;Igf1;Nfil3;Ngf;Noct;Nos2;Prkg2;Prok2;Prokr1;Prokr2;Slc4a1;Timeless;Tph1;Tyms
GO:0007625	grooming behavior	biological_process	NA	1	1755	15	19037	0.765745	0.867375	0.723153	Drd1
GO:0007626	locomotory behavior	biological_process	NA	8	1755	106	19037	0.77216	0.873638	0.818664	Adora2a;Aldh1a3;Chrna4;Drd1;Gpr88;Nrg1;Olfm2;Penk
GO:0007628	adult walking behavior	biological_process	multicellular organismal process	3	1755	41	19037	0.742087	0.853711	0.793704	Drd1;Glra1;Trh
GO:0007631	feeding behavior	biological_process	NA	8	1755	41	19037	0.0313818	0.180637	2.11655	Apln;Bdnf;Drd1;Gpr88;Npy4r;Prokr1;Prokr2;Stra6
GO:0008009	chemokine activity	molecular_function	binding|receptor regulator activity	16	1755	37	19037	5.00663e-08	4.84269e-06	4.69072	Ccl12;Ccl17;Ccl2;Ccl22;Ccl5;Ccl7;Ccl9;Cxcl1;Cxcl10;Cxcl11;Cxcl13;Cxcl2;Cxcl3;Cxcl6;Cxcl9;LOC290595
GO:0008013	beta-catenin binding	molecular_function	binding	4	1755	84	19037	0.957291	0.985458	0.516538	Cdh24;Cxadr;Met;Nos2
GO:0008015	blood circulation	biological_process	multicellular organismal process	4	1755	13	19037	0.0261266	0.162116	3.33763	F5;Npy4r;Prokr1;Prokr2
GO:0008016	regulation of heart contraction	biological_process	biological regulation|multicellular organismal process|regulation of biological process	4	1755	26	19037	0.214094	0.531251	1.66881	Cav3;Gja1;Hbegf;Nos2
GO:0008017	microtubule binding	molecular_function	binding	47	1755	257	19037	3.97321e-06	0.000210751	1.98375	Birc5;Capn6;Ccdc88b;Ccsap;Cenpe;Clip2;Cryab;Fam83d;Fes;Fmn1;Ftcd;Gas2l3;Kif11;Kif14;Kif15;Kif18a;Kif18b;Kif20a;Kif20b;Kif22;Kif23;Kif2c;Kif4a;Kif5c;Kifc1;Map1b;Mx1;Myh1;Myh10;Myh2;Myh3;Myh4;Myo10;Myo1f;Myo1g;Myo7a;Nav3;Nusap1;Plk1;Prc1;Racgap1;Rgs14;S100a8;S100a9;Ska1;Ska2;Spag5
GO:0008020	G-protein coupled photoreceptor activity	molecular_function	molecular transducer activity|receptor activity	1	1755	8	19037	0.53879	0.748901	1.35591	Opn3
GO:0008021	synaptic vesicle	cellular_component	cell|cell part|organelle|synapse|synapse part	14	1755	153	19037	0.552745	0.76657	0.992563	Amph;Bdnf;Dbi;Htr7;Ngf;Picalm;Ptprn;Rab13;Sept5;Slc17a6;Slc5a7;Snap91;Sphk1;Sv2c
GO:0008022	protein C-terminus binding	molecular_function	binding	21	1755	231	19037	0.560525	0.772752	0.986118	Amph;Atp1b1;Cav3;Cdc20;Cenpf;Ciita;Coro1a;Ctgf;Dynlt1;Fn1;Grip1;Hspg2;Lck;Mki67;Ncf2;Rad51;Rasgrf1;Slc4a1;Top2a;Vgll3;Vim
GO:0008028	monocarboxylic acid transmembrane transporter activity	molecular_function	transporter activity	3	1755	14	19037	0.13238	0.394341	2.32442	Slc16a12;Slc16a14;Slc16a3
GO:0008035	high-density lipoprotein particle binding	molecular_function	binding	2	1755	7	19037	0.130648	0.394341	3.09923	Gpihbp1;Lrp8
GO:0008037	cell recognition	biological_process	cellular process	3	1755	19	19037	0.252891	0.592923	1.71273	Clec7a;Ncr3;PVR
GO:0008045	motor neuron axon guidance	biological_process	cellular component organization or biogenesis|cellular process|developmental process|locomotion|multicellular organismal process|response to stimulus	5	1755	27	19037	0.0973013	0.333151	2.00876	Cxcr4;Egr2;Etv4;Kif5c;Slit2
GO:0008046	axon guidance receptor activity	molecular_function	molecular transducer activity|receptor activity	2	1755	8	19037	0.163948	0.448809	2.71182	Ephb2;Robo2
GO:0008047	enzyme activator activity	molecular_function	enzyme regulator activity	2	1755	29	19037	0.761495	0.867375	0.748089	Apobec1;Wfdc21
GO:0008053	mitochondrial fusion	biological_process	cellular component organization or biogenesis|cellular process	2	1755	21	19037	0.589171	0.779191	1.03308	Bak1;Bcl2a1
GO:0008061	chitin binding	molecular_function	binding	1	1755	9	19037	0.581326	0.772752	1.20525	Chi3l1
GO:0008064	regulation of actin polymerization or depolymerization	biological_process	biological regulation|cellular component organization or biogenesis|cellular process|regulation of biological process	3	1755	10	19037	0.0573429	0.263118	3.25419	Cit;Coro1a;Was
GO:0008065	establishment of blood-nerve barrier	biological_process	cellular process|developmental process|multicellular organismal process	1	1755	5	19037	0.38347	0.688406	2.16946	Ren
GO:0008066	glutamate receptor activity	molecular_function	molecular transducer activity|receptor activity	2	1755	19	19037	0.533766	0.748901	1.14182	Gria3;Grid2
GO:0008074	guanylate cyclase complex, soluble	cellular_component	cell|cell part|macromolecular complex	2	1755	20	19037	0.562097	0.772752	1.08473	Adcy2;Adcy7
GO:0008076	voltage-gated potassium channel complex	cellular_component	cell|cell part|macromolecular complex|membrane|membrane part	7	1755	80	19037	0.614336	0.789613	0.949138	Kcna3;Kcna6;Kcna7;Kcnab2;Kcnd1;Kcng2;Kcnj2
GO:0008081	phosphoric diester hydrolase activity	molecular_function	catalytic activity	1	1755	11	19037	0.654997	0.810409	0.986118	Plcxd2
GO:0008083	growth factor activity	molecular_function	binding|receptor regulator activity	34	1755	142	19037	1.59324e-07	1.26766e-05	2.59724	Areg;Bdnf;Bmp3;Ctgf;Cxcl1;Epgn;Ereg;Fgf18;Fgf9;Figf;Gdf15;Gdf5;Gdf6;Gdnf;Gmfg;Hbegf;Igf1;Il11;Il6;Inhba;Inhbb;Lif;Manf;Ngf;Nov;Nrg1;Reg1a;Tgfb1;Tgfb2;Tgfb3;Thbs4;Timp1;Vegfc;Vgf
GO:0008090	retrograde axonal transport	biological_process	cellular process|establishment of localization|localization	1	1755	11	19037	0.654997	0.810409	0.986118	Tmem108
GO:0008092	cytoskeletal protein binding	molecular_function	binding	9	1755	82	19037	0.34293	0.688406	1.19056	Actn2;Cdh11;Cdh24;Coro1a;Cryab;Dbn1;Des;Flnc;Ncam1
GO:0008094	DNA-dependent ATPase activity	molecular_function	catalytic activity	3	1755	36	19037	0.657301	0.811427	0.903941	Rad51;Rad51c;Top2a
GO:0008104	protein localization	biological_process	localization	9	1755	88	19037	0.423847	0.704458	1.10938	Akap2;Cav3;Grip1;Hspg2;Kif5c;Mall;Plod3;Sgo2;Treml4
GO:0008106	alcohol dehydrogenase (NADP+) activity	molecular_function	catalytic activity	1	1755	18	19037	0.824788	0.899354	0.602627	Akr1b8
GO:0008131	primary amine oxidase activity	molecular_function	catalytic activity	1	1755	8	19037	0.53879	0.748901	1.35591	Aoc1
GO:0008134	transcription factor binding	molecular_function	binding	19	1755	365	19037	0.99852	1	0.564654	Ankrd1;Bcl3;Cenpf;E2f1;Egr1;Eya2;Gata4;Hmga2;Hmgb2;Hmgb2l1;Mdfi;Nlrp3;Nr4a1;Prickle1;Ptprn;Rbl1;RT1-Bb;Tnfrsf10b;Tp73
GO:0008135	translation factor activity, RNA binding	molecular_function	binding	1	1755	12	19037	0.686821	0.824954	0.903941	Sox11
GO:0008138	protein tyrosine/serine/threonine phosphatase activity	molecular_function	catalytic activity	4	1755	46	19037	0.623375	0.793168	0.943243	Cdkn3;Dusp2;Dusp4;LOC103690006
GO:0008139	nuclear localization sequence binding	molecular_function	binding	1	1755	27	19037	0.926707	0.964236	0.401752	Kpna2
GO:0008144	drug binding	molecular_function	binding	23	1755	112	19037	0.000195543	0.00475178	2.22757	Aoc1;Atp1b1;Chrna4;Cxcr4;Dhfr;Drd1;Folr2;Fscn1;Gsta2;Gstp1;Hmgb2;Hmgb2l1;Hmgcs1;Htr2a;Il2ra;Nme2;P2rx4;P2rx5;Sfrp1;Tlr7;Tlr8;Top2a;Tyms
GO:0008146	sulfotransferase activity	molecular_function	catalytic activity	2	1755	35	19037	0.84599	0.914388	0.619845	Chst10;Chst11
GO:0008150	biological_process	biological_process	NA	152	1755	1913	19037	0.982287	0.998453	0.861886	Actg2;Adam12;Adam19;Adam8;Adamts12;Ahsp;Aim1;Aim2;Angpt4;Ankh;Aoc1;Apol2;Arl4c;Aspm;Bank1;Bcat1;Bmpr1b;Bst1;Bub1b;C1qa;C1qc;Card11;Ccl17;Ccl22;Cdc7;Cdh24;Cdhr1;Cdkn3;Cdsn;Cfi;Cfp;Cilp;Cks2;Coch;Col5a1;Col7a1;Coro1a;Crlf1;Emp1;Epgn;Ephb2;Esco2;Exo1;Fancd2;Fanci;Fblim1;Fcrl2;Fermt3;Ffar2;Fgr;Folr2;Frem1;Glis1;Gngt2;Gpc4;Gpr183;Grid2;H2afy2;Heatr1;Hells;Hjurp;Hk3;Hmgb2l1;Il21r;Il22ra1;Inpp5d;Itga10;…
GO:0008154	actin polymerization or depolymerization	biological_process	cellular component organization or biogenesis|cellular process	2	1755	12	19037	0.304935	0.660045	1.80788	Enah;Was
GO:0008156	negative regulation of DNA replication	biological_process	biological regulation|cellular process|metabolic process|negative regulation of biological process|regulation of biological process	3	1755	19	19037	0.252891	0.592923	1.71273	Gmnn;Tgfb1;Tgfb3
GO:0008157	protein phosphatase 1 binding	molecular_function	binding	1	1755	21	19037	0.868956	0.925897	0.516538	Pirb
GO:0008168	methyltransferase activity	molecular_function	catalytic activity	3	1755	46	19037	0.80928	0.891111	0.707432	Mettl21b;Nsun4;Suv39h2
GO:0008179	adenylate cyclase binding	molecular_function	binding	1	1755	15	19037	0.765745	0.867375	0.723153	Adcy2
GO:0008180	COP9 signalosome	cellular_component	cell|cell part|macromolecular complex|organelle|organelle part	1	1755	33	19037	0.959015	0.98594	0.328706	Basp1
GO:0008188	neuropeptide receptor activity	molecular_function	molecular transducer activity|receptor activity	2	1755	12	19037	0.304935	0.660045	1.80788	Grpr;Mrgprx3
GO:0008191	metalloendopeptidase inhibitor activity	molecular_function	enzyme regulator activity	4	1755	11	19037	0.0139929	0.10432	3.94447	Fetub;Lxn;Ngf;Timp1
GO:0008194	UDP-glycosyltransferase activity	molecular_function	catalytic activity	1	1755	16	19037	0.787358	0.877748	0.677956	Ugt2b7
GO:0008195	phosphatidate phosphatase activity	molecular_function	catalytic activity	2	1755	14	19037	0.37477	0.688406	1.54961	Plpp1;Plpp4
GO:0008199	ferric iron binding	molecular_function	binding	1	1755	18	19037	0.824788	0.899354	0.602627	Rrm2
GO:0008201	heparin binding	molecular_function	binding	43	1755	148	19037	4.63305e-12	1.3444e-09	3.15158	Adamts1;Aoc1;Aplp1;Ccdc80;Ccl2;Ccl5;Ccl7;Col5a1;Ctgf;Cxcl10;Cxcl11;Cxcl13;Cyr61;Fbn1;Fgf9;Fn1;Fstl1;Gpnmb;Hbegf;Hist1h1a;Itgam;Lipg;Ltbp2;Lxn;Mmp7;Ncam1;Ndnf;Nov;Pcolce;Pcsk6;Pdcd5;Pla2g2d;Postn;Ptprc;Rspo1;Selp;Sfrp1;Slit2;Thbs1;Thbs2;Thbs4;Wisp1;Wisp2
GO:0008202	steroid metabolic process	biological_process	metabolic process	1	1755	35	19037	0.966235	0.990532	0.309923	Cyp1b1
GO:0008203	cholesterol metabolic process	biological_process	metabolic process	9	1755	60	19037	0.0976114	0.333151	1.62709	Apoc3;Ch25h;Cyp11b2;Fgl1;Ldlr;Pcsk9;Pctp;Soat1;Sqle
GO:0008209	androgen metabolic process	biological_process	biological regulation|cellular process|metabolic process	1	1755	17	19037	0.806977	0.889729	0.638076	Ugt2b7
GO:0008210	estrogen metabolic process	biological_process	biological regulation|cellular process|metabolic process	1	1755	11	19037	0.654997	0.810409	0.986118	Cyp1b1
GO:0008217	regulation of blood pressure	biological_process	biological regulation|multicellular organismal process	13	1755	62	19037	0.00377217	0.043681	2.27443	C3ar1;Col1a2;Cyp11b2;Edn1;Ednra;Ednrb;Gch1;Hmox1;Nos2;P2rx4;Ptgs2;Ren;Scnn1a
GO:0008219	cell death	biological_process	cellular process	6	1755	34	19037	0.087842	0.328028	1.91423	Emp1;Emp3;Hmox1;Htr2a;Olr1;Tgfb2
GO:0008228	opsonization	biological_process	establishment of localization|immune system process|localization	1	1755	5	19037	0.38347	0.688406	2.16946	Ptx3
GO:0008233	peptidase activity	molecular_function	catalytic activity	21	1755	123	19037	0.00413105	0.0472818	1.85198	Adamts3;Adamts6;Adamtsl2;Cma1;Cpa3;Ctrb1;Ctss;Espl1;Fap;Lgmn;Masp1;Mmp2;Mmp7;Mmp9;Napsa;Pappa;Pcsk5;Plau;Prss12;Ren;Tpsab1
GO:0008234	cysteine-type peptidase activity	molecular_function	catalytic activity	4	1755	29	19037	0.276247	0.62225	1.49618	Casp12;Ctsk;Ctss;Espl1
GO:0008235	metalloexopeptidase activity	molecular_function	catalytic activity	1	1755	7	19037	0.491934	0.73204	1.54961	Dpep2
GO:0008236	serine-type peptidase activity	molecular_function	catalytic activity	8	1755	48	19037	0.0704563	0.280517	1.80788	Cma1;Dpp4;Fap;Gzmk;Htra1;Prss16;Tmprss11b;Tmprss11e
GO:0008237	metallopeptidase activity	molecular_function	catalytic activity	9	1755	53	19037	0.0516092	0.251321	1.84199	Adam8;Adam9;Adamts4;Adamts9;Mmp2;Mmp7;Mmp8;Mmp9;Pappa
GO:0008239	dipeptidyl-peptidase activity	molecular_function	catalytic activity	4	1755	11	19037	0.0139929	0.10432	3.94447	Dpep2;Dpp4;Fap;Prss16
GO:0008250	oligosaccharyltransferase complex	cellular_component	cell|cell part|macromolecular complex|membrane|membrane part|organelle|organelle part	1	1755	11	19037	0.654997	0.810409	0.986118	Ostc
GO:0008253	5'-nucleotidase activity	molecular_function	catalytic activity	2	1755	13	19037	0.340143	0.688406	1.66881	Nt5dc2;Nt5dc3
GO:0008266	poly(U) RNA binding	molecular_function	binding	1	1755	19	19037	0.840956	0.910743	0.57091	Rbm11
GO:0008270	zinc ion binding	molecular_function	binding	63	1755	682	19037	0.513255	0.748901	1.00202	Adam8;Adamts1;Adamts20;Adamts8;Adamts9;Adh7;Aoc1;Apobec1;Apobec3b;Birc5;Brca1;Car1;Car13;Car2;Cpa3;Cpa4;Cpz;Dbf4;Dctd;Dhx58;Egr1;Gata4;Gch1;Glra1;Litaf;LOC100910636;LOC100912399;March1;Mefv;Mmp10;Mmp17;Mmp19;Mmp2;Mmp23;Mmp7;Mmp8;Mmp9;Neil3;Nr4a1;Nr4a3;P2rx4;P2rx5;Pgr;Pole;Prickle1;Pter;S100a3;S100a8;S100a9;Sec24d;Suv39h2;Tes;Timp1;Tk1;Tll1;Trim30c;Trim55;Trim59;Trim66;Trim7;Uhrf1;Wt1;Zcchc12
GO:0008271	secondary active sulfate transmembrane transporter activity	molecular_function	transporter activity	1	1755	12	19037	0.686821	0.824954	0.903941	Slc26a9
GO:0008272	sulfate transport	biological_process	establishment of localization|localization	1	1755	10	19037	0.619941	0.789613	1.08473	Racgap1
GO:0008276	protein methyltransferase activity	molecular_function	catalytic activity	1	1755	13	19037	0.715711	0.839021	0.834407	Suv39h2
GO:0008277	regulation of G-protein coupled receptor protein signaling pathway	biological_process	biological regulation|cellular process|regulation of biological process|response to stimulus|signaling	8	1755	34	19037	0.0105673	0.0871713	2.5523	Dynlt1;Itgb1;LOC681355;Plcb1;Ramp3;Rgs14;Rgs18;Rgs19
GO:0008278	cohesin complex	cellular_component	cell|cell part|macromolecular complex|organelle|organelle part	1	1755	7	19037	0.491934	0.73204	1.54961	Cdca5
GO:0008283	cell proliferation	biological_process	NA	42	1755	237	19037	2.77286e-05	0.00110107	1.92231	Aurkb;Bak1;Bub1;Cd74;Cdk1;Cks1b;Cks2;Csf1r;E2f8;Entpd5;Ereg;Fam83d;Fgf18;Figf;Foxc2;Gbx2;Gdnf;Gng2;Hmga2;Igf1;Il18;Il18rap;Itga2;Lipg;Mcm10;Melk;Mki67;Myh10;Ncf1;Nrg1;Picalm;Prdx1;Prok2;Ptpn6;Rasgrf1;Rasgrp4;Sh2d2a;Sox11;Tacc3;Tgfb1;Txnrd1;Uhrf1
GO:0008284	positive regulation of cell proliferation	biological_process	biological regulation|cellular process|positive regulation of biological process|regulation of biological process	85	1755	544	19037	8.76657e-07	5.76606e-05	1.69489	Aldh1a2;Apln;Areg;Arnt2;Bst1;Calr;Camp;Cav3;Cd38;Cdc20;Cdc7;Col18a1;Crlf1;Csf1r;Ctgf;Cxcl10;Cxcr2;Dpp4;E2f3;Edn1;Ednra;Ednrb;Epgn;Ereg;Esm1;F2r;Fabp4;Fgf18;Fgf9;Fgfbp1;Figf;Fn1;Folr2;Foxm1;Gdnf;Grem1;Has2;Hbegf;Hck;Hcls1;Hmga2;Htr2a;Igf1;Il11;Il1b;Il6;Itgav;Itgb1;Kif14;Kif20b;Lexm;Lif;Lyn;Mfge8;Mycn;Ngf;Nrg1;Osmr;Pak1;Pdgfrb;Pgr;Plac8;Plau;Prc1;Prok2;Ptgfr;Ptgs2;Pthlh;Ptpn6;Rac2;Reg1a;Reg3b;Reg3g…
GO:0008285	negative regulation of cell proliferation	biological_process	biological regulation|cellular process|negative regulation of biological process|regulation of biological process	61	1755	386	19037	2.11076e-05	0.000874991	1.71421	Adora1;Adora2a;Aldh1a2;Bak1;Bcl11b;Brip1;Btg3;Cd37;Cdkn2b;Csf1r;Cth;Cyp1b1;Cyp27b1;E2f7;Ereg;F2r;Gja1;Hist1h2ai;Hmox1;Hspg2;Ifit3;Igf1;Il10;Il1a;Il1b;Il1rl1;Il6;Inhba;Inpp5d;Itgb1;Lif;LOC103690190;LOC361346;Lyn;Mtbp;Ndn;Nfe2;Nox4;Pdcd5;Ptgs2;Pttg1;Reg1a;Rgcc;Ripply3;Sfrp1;Sfrp4;Slfn3;Slit2;Slit3;Spry1;Tes;Tgfb1;Tgfb2;Tgfb3;Tlr2;Tnfrsf9;Tp73;Trpv2;Vegfc;Wisp2;Wt1
GO:0008286	insulin receptor signaling pathway	biological_process	biological regulation|cellular process|regulation of biological process|response to stimulus|signaling	3	1755	56	19037	0.900052	0.946686	0.581105	Foxc2;Grb14;Sh2b2
GO:0008289	lipid binding	molecular_function	binding	9	1755	119	19037	0.779043	0.877748	0.820384	Apol2;Apold1;C3;Cd55;Dbi;Ffar2;Fyb;Hmgb2;Stard4
GO:0008290	F-actin capping protein complex	cellular_component	cell|cell part|macromolecular complex|organelle|organelle part	1	1755	8	19037	0.53879	0.748901	1.35591	Add2
GO:0008299	isoprenoid biosynthetic process	biological_process	cellular process|metabolic process	3	1755	16	19037	0.178116	0.475714	2.03387	Fdps;Hmgcs1;Idi1
GO:0008301	DNA binding, bending	molecular_function	binding	4	1755	17	19037	0.0648145	0.280328	2.5523	Hmga2;Hmgb2;Hmgb2l1;Top2a
GO:0008305	integrin complex	cellular_component	cell|cell part|macromolecular complex|membrane|membrane part	7	1755	16	19037	0.000302592	0.00681591	4.74569	Bst1;Itga5;Itga8;Itgam;Itgav;Itgax;Itgb1
GO:0008306	associative learning	biological_process	multicellular organismal process	2	1755	38	19037	0.877121	0.931853	0.57091	Drd1;Nptx2
GO:0008307	structural constituent of muscle	molecular_function	structural molecule activity	5	1755	27	19037	0.0973013	0.333151	2.00876	Mybpc1;Mybpc2;Mybph;Tpm3;Tpm4
GO:0008320	protein transmembrane transporter activity	molecular_function	transporter activity	1	1755	5	19037	0.38347	0.688406	2.16946	Gpihbp1
GO:0008327	methyl-CpG binding	molecular_function	binding	1	1755	19	19037	0.840956	0.910743	0.57091	Uhrf1
GO:0008328	ionotropic glutamate receptor complex	cellular_component	cell|cell part|macromolecular complex|membrane|membrane part	2	1755	19	19037	0.533766	0.748901	1.14182	Gria3;Grid2
GO:0008329	signaling pattern recognition receptor activity	molecular_function	molecular transducer activity|receptor activity	3	1755	6	19037	0.0126377	0.096654	5.42365	Clec7a;Fcnb;Tlr2
GO:0008340	determination of adult lifespan	biological_process	developmental process|multicellular organismal process	4	1755	19	19037	0.0912949	0.330931	2.28364	Ankle1;Inpp5d;Rad54b;Rad54l
GO:0008344	adult locomotory behavior	biological_process	multicellular organismal process	4	1755	63	19037	0.844361	0.91403	0.688717	Atp1a3;En1;Ngf;Sez6l2
GO:0008347	glial cell migration	biological_process	cellular process|developmental process|localization|locomotion|multicellular organismal process	5	1755	12	19037	0.00301526	0.0372789	4.51971	Ccl2;Fn1;Ndn;Tgfb2;Vcan
GO:0008353	RNA polymerase II carboxy-terminal domain kinase activity	molecular_function	catalytic activity	1	1755	16	19037	0.787358	0.877748	0.677956	Cdk1
GO:0008354	germ cell migration	biological_process	cellular process|localization|locomotion|multicellular organismal process|multi-organism process|reproduction|reproductive process	4	1755	9	19037	0.00620695	0.0621893	4.82102	Cxadr;Cxcr4;Itgb1;Tgfb1
GO:0008360	regulation of cell shape	biological_process	biological regulation|cellular component organization or biogenesis|cellular process|developmental process|regulation of biological process	28	1755	150	19037	0.000234895	0.00546573	2.02483	Anxa1;Arhgap15;Ccl12;Ccl2;Ccl7;Cdc42ep1;Cdc7;Coch;Coro1a;Csf1r;Fes;Fgr;Fmnl1;Fmnl3;Fn1;Hck;Icam1;Il6;Msn;Myh10;Myl12a;Myo10;Plxnc1;Rnd1;Rnd3;Strip2;Ttbk1;Was
GO:0008361	regulation of cell size	biological_process	biological regulation|cellular component organization or biogenesis|cellular process	3	1755	26	19037	0.434498	0.704458	1.25161	Iqgap3;Msn;Vav1
GO:0008366	axon ensheathment	biological_process	cellular process|developmental process|multicellular organismal process	1	1755	7	19037	0.491934	0.73204	1.54961	Nrg1
GO:0008373	sialyltransferase activity	molecular_function	catalytic activity	2	1755	20	19037	0.562097	0.772752	1.08473	St6galnac1;St8sia2
GO:0008374	O-acyltransferase activity	molecular_function	catalytic activity	2	1755	6	19037	0.0992091	0.333151	3.61576	Lrat;Soat1
GO:0008375	acetylglucosaminyltransferase activity	molecular_function	catalytic activity	3	1755	30	19037	0.531386	0.748901	1.08473	B3galnt1;B3gnt3;Ext1
GO:0008376	acetylgalactosaminyltransferase activity	molecular_function	catalytic activity	5	1755	24	19037	0.0641951	0.280328	2.25985	B3galnt1;B3gnt3;Chpf2;Chsy3;Csgalnact1
GO:0008378	galactosyltransferase activity	molecular_function	catalytic activity	1	1755	16	19037	0.787358	0.877748	0.677956	B3gnt3
GO:0008379	thioredoxin peroxidase activity	molecular_function	antioxidant activity|catalytic activity	1	1755	5	19037	0.38347	0.688406	2.16946	Prdx1
GO:0008380	RNA splicing	biological_process	cellular process|metabolic process	1	1755	96	19037	0.999909	1	0.112993	Wt1
GO:0008381	mechanosensitive ion channel activity	molecular_function	transporter activity	2	1755	5	19037	0.070352	0.280328	4.33892	Piezo1;Piezo2
GO:0008395	steroid hydroxylase activity	molecular_function	catalytic activity	2	1755	44	19037	0.922672	0.962881	0.493059	Ch25h;Cyp2d1
GO:0008406	gonad development	biological_process	developmental process|multicellular organismal process|reproduction|reproductive process	1	1755	10	19037	0.619941	0.789613	1.08473	Wt1
GO:0008408	3'-5' exonuclease activity	molecular_function	catalytic activity	1	1755	17	19037	0.806977	0.889729	0.638076	Rexo2
GO:0008409	5'-3' exonuclease activity	molecular_function	catalytic activity	2	1755	11	19037	0.269385	0.609577	1.97224	Fen1;Polq
GO:0008422	beta-glucosidase activity	molecular_function	catalytic activity	1	1755	5	19037	0.38347	0.688406	2.16946	Lctl
GO:0008429	phosphatidylethanolamine binding	molecular_function	binding	2	1755	9	19037	0.198499	0.505521	2.41051	Cd300a;Mfge8
GO:0008432	JUN kinase binding	molecular_function	binding	1	1755	12	19037	0.686821	0.824954	0.903941	Gstp1
GO:0008479	queuine tRNA-ribosyltransferase activity	molecular_function	catalytic activity	1	1755	7	19037	0.491934	0.73204	1.54961	Pdc
GO:0008484	sulfuric ester hydrolase activity	molecular_function	catalytic activity	1	1755	9	19037	0.581326	0.772752	1.20525	Arsi
GO:0008499	UDP-galactose:beta-N-acetylglucosamine beta-1,3-galactosyltransferase activity	molecular_function	catalytic activity	1	1755	7	19037	0.491934	0.73204	1.54961	B3galnt1
GO:0008504	monoamine transmembrane transporter activity	molecular_function	transporter activity	1	1755	7	19037	0.491934	0.73204	1.54961	Slc6a2
GO:0008509	anion transmembrane transporter activity	molecular_function	transporter activity	3	1755	15	19037	0.154716	0.444764	2.16946	Slc4a1;Slc4a5;Slc4a8
GO:0008510	sodium:bicarbonate symporter activity	molecular_function	transporter activity	3	1755	9	19037	0.043019	0.217503	3.61576	Slc4a1;Slc4a5;Slc4a8
GO:0008517	folic acid transmembrane transporter activity	molecular_function	transporter activity	1	1755	6	19037	0.440322	0.704458	1.80788	Folr2
GO:0008519	ammonium transmembrane transporter activity	molecular_function	transporter activity	2	1755	7	19037	0.130648	0.394341	3.09923	Rhbg;Rhd
GO:0008525	phosphatidylcholine transporter activity	molecular_function	transporter activity	2	1755	7	19037	0.130648	0.394341	3.09923	Abcb4;Pctp
GO:0008527	taste receptor activity	molecular_function	molecular transducer activity|receptor activity	1	1755	15	19037	0.765745	0.867375	0.723153	Ffar4
GO:0008528	G-protein coupled peptide receptor activity	molecular_function	molecular transducer activity|receptor activity	5	1755	21	19037	0.0386015	0.207883	2.58269	Cysltr2;Gpr84;Grpr;Ltb4r;Ltb4r2
GO:0008532	N-acetyllactosaminide beta-1,3-N-acetylglucosaminyltransferase activity	molecular_function	catalytic activity	1	1755	10	19037	0.619941	0.789613	1.08473	B3gnt3
GO:0008536	Ran GTPase binding	molecular_function	binding	1	1755	29	19037	0.939615	0.972743	0.374045	Birc5
GO:0008542	visual learning	biological_process	multicellular organismal process|response to stimulus	6	1755	65	19037	0.5611	0.772752	1.00129	Atp1a3;Drd1;Hrh1;Itgb1;Lrrn4;Rgs14
GO:0008543	fibroblast growth factor receptor signaling pathway	biological_process	biological regulation|cellular process|regulation of biological process|response to stimulus|signaling	4	1755	43	19037	0.568921	0.772752	1.00905	Ctgf;Fgf18;Fgf9;Shcbp1
GO:0008544	epidermis development	biological_process	developmental process	2	1755	44	19037	0.922672	0.962881	0.493059	Cst6;Krt76
GO:0008553	proton-exporting ATPase activity, phosphorylative mechanism	molecular_function	catalytic activity|transporter activity	1	1755	14	19037	0.741937	0.853711	0.774807	Atp6v1e2
GO:0008559	xenobiotic transmembrane transporting ATPase activity	molecular_function	catalytic activity|transporter activity	1	1755	5	19037	0.38347	0.688406	2.16946	Abcb1b
GO:0008565	protein transporter activity	molecular_function	transporter activity	4	1755	65	19037	0.861263	0.922809	0.667526	Kpna2;Ramp3;Sec61g;Unc93b1
GO:0008568	microtubule-severing ATPase activity	molecular_function	catalytic activity	1	1755	12	19037	0.686821	0.824954	0.903941	Fignl1
GO:0008574	ATP-dependent microtubule motor activity, plus-end-directed	molecular_function	catalytic activity	7	1755	31	19037	0.0204341	0.134142	2.44939	Kif11;Kif14;Kif18a;Kif18b;Kif20b;Kif4a;Kif5c
GO:0008584	male gonad development	biological_process	developmental process|multicellular organismal process|reproduction|reproductive process	22	1755	147	19037	0.0157955	0.114756	1.6234	Aspm;Brip1;Cyp1b1;Fdps;Fgf9;Fstl3;Gata4;Gdnf;Hmga2;Hmgb2;Hmgcs1;Inhba;Inhbb;Met;Pdgfrb;Ren;Rrm1;Sfrp1;Tgfb2;Tlr9;Tnfrsf10b;Wt1
GO:0008585	female gonad development	biological_process	developmental process|multicellular organismal process|reproduction|reproductive process	5	1755	33	19037	0.183506	0.488787	1.64353	Fst;Idh1;Inhbb;Serpine1;Sfrp1
GO:0008593	regulation of Notch signaling pathway	biological_process	biological regulation|cellular process|regulation of biological process|response to stimulus|signaling	1	1755	17	19037	0.806977	0.889729	0.638076	Postn
GO:0008594	photoreceptor cell morphogenesis	biological_process	cellular component organization or biogenesis|cellular process|developmental process|multicellular organismal process	1	1755	5	19037	0.38347	0.688406	2.16946	Cdhr1
GO:0008603	cAMP-dependent protein kinase regulator activity	molecular_function	enzyme regulator activity	1	1755	6	19037	0.440322	0.704458	1.80788	Nos2
GO:0008608	attachment of spindle microtubules to kinetochore	biological_process	cellular process	4	1755	9	19037	0.00620695	0.0621893	4.82102	Cenpe;Knl1;Ndc80;Sgo1
GO:0008610	lipid biosynthetic process	biological_process	metabolic process	1	1755	16	19037	0.787358	0.877748	0.677956	Olah
GO:0008616	queuosine biosynthetic process	biological_process	cellular process|metabolic process	1	1755	7	19037	0.491934	0.73204	1.54961	Pdc
GO:0008622	epsilon DNA polymerase complex	cellular_component	cell|cell part|macromolecular complex|membrane-enclosed lumen|organelle|organelle part	2	1755	5	19037	0.070352	0.280328	4.33892	Pole;Pole2
GO:0008625	extrinsic apoptotic signaling pathway via death domain receptors	biological_process	biological regulation|cellular process|regulation of biological process|response to stimulus|signaling	4	1755	27	19037	0.234406	0.556728	1.60701	Fas;Il18;Ngf;Tnfrsf10b
GO:0008626	granzyme-mediated apoptotic signaling pathway	biological_process	biological regulation|cellular process|regulation of biological process|response to stimulus|signaling	1	1755	17	19037	0.806977	0.889729	0.638076	Srgn
GO:0008630	intrinsic apoptotic signaling pathway in response to DNA damage	biological_process	biological regulation|cellular process|regulation of biological process|response to stimulus|signaling	8	1755	52	19037	0.10212	0.341993	1.66881	Bak1;Bcl2a1;Brca1;E2f1;Hmox1;Ier3;Pmaip1;Tnfrsf1b
GO:0008631	intrinsic apoptotic signaling pathway in response to oxidative stress	biological_process	biological regulation|cellular process|regulation of biological process|response to stimulus|signaling	2	1755	17	19037	0.473442	0.73204	1.27615	Cyp1b1;Melk
GO:0008635	activation of cysteine-type endopeptidase activity involved in apoptotic process by cytochrome c	biological_process	biological regulation|cellular process|metabolic process|positive regulation of biological process|regulation of biological process	1	1755	6	19037	0.440322	0.704458	1.80788	Bak1
GO:0008821	crossover junction endodeoxyribonuclease activity	molecular_function	catalytic activity	3	1755	9	19037	0.043019	0.217503	3.61576	Eme1;Gen1;Rad51c
GO:0008865	fructokinase activity	molecular_function	catalytic activity	1	1755	5	19037	0.38347	0.688406	2.16946	Hk3
GO:0008970	phosphatidylcholine 1-acylhydrolase activity	molecular_function	catalytic activity	1	1755	6	19037	0.440322	0.704458	1.80788	Lipg
GO:0009048	dosage compensation by inactivation of X chromosome	biological_process	biological regulation|metabolic process|regulation of biological process	1	1755	6	19037	0.440322	0.704458	1.80788	Brca1
GO:0009052	pentose-phosphate shunt, non-oxidative branch	biological_process	cellular process|metabolic process	1	1755	5	19037	0.38347	0.688406	2.16946	Tkt
GO:0009055	electron transfer activity	molecular_function	catalytic activity	5	1755	36	19037	0.234367	0.556728	1.50657	Aox2;Cybb;Nqo1;Sh3bgrl3;Txnrd1
GO:0009056	catabolic process	biological_process	metabolic process	1	1755	16	19037	0.787358	0.877748	0.677956	Pter
GO:0009058	biosynthetic process	biological_process	metabolic process	2	1755	17	19037	0.473442	0.73204	1.27615	Aldh1l2;Pcyt1b
GO:0009060	aerobic respiration	biological_process	cellular process|metabolic process	2	1755	26	19037	0.705744	0.839021	0.834407	Cox6a2;Mtfr2
GO:0009083	branched-chain amino acid catabolic process	biological_process	cellular process|metabolic process	1	1755	5	19037	0.38347	0.688406	2.16946	Bcat1
GO:0009100	glycoprotein metabolic process	biological_process	cellular process|metabolic process	1	1755	12	19037	0.686821	0.824954	0.903941	Pcsk6
GO:0009115	xanthine catabolic process	biological_process	cellular process|metabolic process	1	1755	5	19037	0.38347	0.688406	2.16946	Aox2
GO:0009142	nucleoside triphosphate biosynthetic process	biological_process	cellular process|metabolic process	1	1755	9	19037	0.581326	0.772752	1.20525	Nme2
GO:0009143	nucleoside triphosphate catabolic process	biological_process	cellular process|metabolic process	2	1755	6	19037	0.0992091	0.333151	3.61576	Dctpp1;Enpp3
GO:0009165	nucleotide biosynthetic process	biological_process	cellular process|metabolic process	1	1755	15	19037	0.765745	0.867375	0.723153	Tk1
GO:0009190	cyclic nucleotide biosynthetic process	biological_process	cellular process|metabolic process	3	1755	21	19037	0.304897	0.660045	1.54961	Adcy2;Adcy7;Mb21d1
GO:0009240	isopentenyl diphosphate biosynthetic process	biological_process	cellular process|metabolic process	1	1755	5	19037	0.38347	0.688406	2.16946	Idi1
GO:0009266	response to temperature stimulus	biological_process	response to stimulus	4	1755	10	19037	0.00959641	0.0801	4.33892	Aldh18a1;F3;Trpm8;Trpv2
GO:0009267	cellular response to starvation	biological_process	cellular process|response to stimulus	5	1755	72	19037	0.80523	0.889729	0.753284	Inhbb;Pcsk9;Sfrp1;Sphk1;Wnt9b
GO:0009268	response to pH	biological_process	response to stimulus	3	1755	17	19037	0.202394	0.507839	1.91423	Car2;Gja1;Tg
GO:0009299	mRNA transcription	biological_process	cellular process|metabolic process	1	1755	7	19037	0.491934	0.73204	1.54961	Ereg
GO:0009306	protein secretion	biological_process	cellular process|establishment of localization|localization	5	1755	45	19037	0.401449	0.704458	1.20525	Erp29;F2rl1;Fgg;Olfm2;Rab13
GO:0009308	amine metabolic process	biological_process	metabolic process	1	1755	8	19037	0.53879	0.748901	1.35591	Aoc1
GO:0009311	oligosaccharide metabolic process	biological_process	metabolic process	2	1755	23	19037	0.639521	0.808083	0.943243	St6galnac1;St8sia2
GO:0009312	oligosaccharide biosynthetic process	biological_process	metabolic process	3	1755	30	19037	0.531386	0.748901	1.08473	B3galnt1;Galnt16;St6galnac1
GO:0009314	response to radiation	biological_process	response to stimulus	15	1755	51	19037	3.61183e-05	0.00131979	3.19038	Acan;Ccr4;Col3a1;Il18;Il1r1;Mmp2;Mmp9;Ngf;Penk;Plk3;Ptgs2;Tgfb1;Tgfb2;Txn1;Vim
GO:0009395	phospholipid catabolic process	biological_process	cellular process|metabolic process	1	1755	15	19037	0.765745	0.867375	0.723153	Pla2g4f
GO:0009404	toxin metabolic process	biological_process	cellular process|metabolic process	1	1755	9	19037	0.581326	0.772752	1.20525	Cyp1b1
GO:0009408	response to heat	biological_process	response to stimulus	12	1755	76	19037	0.0447397	0.22429	1.71273	Ccl2;Cd14;Cxcl1;Cxcl2;Igf1;Il1a;Il1b;Il6;Mmp9;Socs3;Trpm2;Trpv2
GO:0009409	response to cold	biological_process	response to stimulus	13	1755	55	19037	0.00120705	0.0183778	2.56391	Casp12;Cxcl10;Dio2;Il18;Il6;Impdh1;Plac8;Rbm3;Tgfb2;Trh;Trpm8;Ucp2;Vgf
GO:0009411	response to UV	biological_process	response to stimulus	5	1755	49	19037	0.475991	0.73204	1.10687	Dtl;LOC100302465;Ns5atp9;Pmaip1;Rad18
GO:0009414	response to water deprivation	biological_process	response to stimulus	2	1755	15	19037	0.408624	0.704458	1.44631	Mapk10;Slc4a1
GO:0009416	response to light stimulus	biological_process	response to stimulus	3	1755	40	19037	0.726589	0.847544	0.813547	Bdnf;Bhlhe40;Mapk10
GO:0009435	NAD biosynthetic process	biological_process	cellular process|metabolic process	2	1755	11	19037	0.269385	0.609577	1.97224	Kmo;Qprt
GO:0009566	fertilization	biological_process	multi-organism process|reproduction|reproductive process	3	1755	50	19037	0.851806	0.919372	0.650838	Clic4;Klk14;Ooep
GO:0009584	detection of visible light	biological_process	response to stimulus	1	1755	7	19037	0.491934	0.73204	1.54961	Opn3
GO:0009611	response to wounding	biological_process	response to stimulus	19	1755	86	19037	0.00025707	0.00595365	2.3965	Arg1;Aurka;Ccl2;F2r;F2rl2;F3;Fabp5;Fn1;Gdnf;Il6;Inhbb;Map1b;Met;Ocm2;Ptpn6;Tgfb1;Tgfb2;Tnc;Vcan
GO:0009612	response to mechanical stimulus	biological_process	response to stimulus	26	1755	106	19037	2.73604e-06	0.000149965	2.66066	Acan;Acta1;Bdkrb1;Ccl2;Ccnb1;Chi3l1;Col1a1;Col3a1;F3;Gata4;Gdf5;Igf1;Igfbp2;Il6;Lck;Map1b;Mgp;Mmp2;Mmp9;Ngf;Nos2;Piezo2;Postn;Rcan1;Thbs1;Tnc
GO:0009615	response to virus	biological_process	multi-organism process|response to stimulus	21	1755	80	19037	7.84691e-06	0.000375814	2.84741	Bcl3;Ccl5;Cfl1;Cxcl10;Dhx58;Eno1;Hmga2;Ifit3;Ifitm1;Lcn2;Mx1;Oas1a;Oas1b;Oas2;Oas3;Oasl;Oasl2;Rsad2;Tbx21;Tlr8;Tlr9
GO:0009617	response to bacterium	biological_process	multi-organism process|response to stimulus	16	1755	44	19037	8.67471e-07	5.76606e-05	3.94447	Adh7;Ccl5;Ccr4;Cd14;Cd40;Defb1;Fcgr1a;Il6;Irf8;Lcn2;Ncf1;Nlrp3;Serpinb9;Slc11a1;Socs3;Tlr2
GO:0009620	response to fungus	biological_process	multi-organism process|response to stimulus	1	1755	6	19037	0.440322	0.704458	1.80788	Bak1
GO:0009629	response to gravity	biological_process	response to stimulus	4	1755	16	19037	0.0533197	0.254377	2.71182	Acan;Hrh1;Myh4;Sparc
GO:0009635	response to herbicide	biological_process	response to stimulus	2	1755	15	19037	0.408624	0.704458	1.44631	Arg1;Lcn2
GO:0009636	response to toxic substance	biological_process	response to stimulus	18	1755	128	19037	0.046429	0.229034	1.5254	Adra1d;Brip1;Ccl5;Ccnb1;Cdk1;Ctrb1;Cyp1b1;Fas;Gstp1;Lyn;Pdgfrb;Penk;Rad51;Slc7a11;Tk1;Tlr2;Trpm6;Tyms
GO:0009642	response to light intensity	biological_process	response to stimulus	1	1755	7	19037	0.491934	0.73204	1.54961	Bdnf
GO:0009650	UV protection	biological_process	response to stimulus	1	1755	10	19037	0.619941	0.789613	1.08473	Mfap4
GO:0009651	response to salt stress	biological_process	response to stimulus	3	1755	21	19037	0.304897	0.660045	1.54961	Ccl5;Cyp11b2;Kmo
GO:0009653	anatomical structure morphogenesis	biological_process	developmental process	7	1755	59	19037	0.299793	0.660045	1.28697	Fbn1;Fbn2;Foxc2;Foxj1;Foxm1;Foxs1;Fscn1
GO:0009725	response to hormone	biological_process	response to stimulus	16	1755	100	19037	0.020408	0.134142	1.73557	Anxa1;Bdnf;Cd38;Foxc2;Hcls1;Hmgcs1;Ldlr;Lox;Lyn;Mgp;Mmp19;Muc4;Nos2;Socs3;Timp1;Tub
GO:0009743	response to carbohydrate	biological_process	response to stimulus	3	1755	20	19037	0.278781	0.625387	1.62709	Il1b;Lyn;Map1b
GO:0009749	response to glucose	biological_process	response to stimulus	17	1755	109	19037	0.0217013	0.139938	1.69178	Acan;Col6a2;Col6a3;Ctgf;Egr1;Gja1;Igf1;Ildr2;Ldha;Ncf2;Nucb2;Pcsk1;Ptprn;Tgfb1;Thbs1;Trh;Ucp2
GO:0009750	response to fructose	biological_process	response to stimulus	2	1755	12	19037	0.304935	0.660045	1.80788	Ptgs2;Slc2a5
GO:0009755	hormone-mediated signaling pathway	biological_process	biological regulation|cellular process|regulation of biological process|response to stimulus|signaling	2	1755	39	19037	0.886135	0.936841	0.556271	Ren;Trh
GO:0009791	post-embryonic development	biological_process	developmental process|multicellular organismal process	6	1755	107	19037	0.93726	0.971937	0.608259	Bcl11b;Chst11;Ndn;Nkx2-3;Prdm1;Tp73
GO:0009838	abscission	biological_process	developmental process|multicellular organismal process	1	1755	6	19037	0.440322	0.704458	1.80788	Aurkb
GO:0009880	embryonic pattern specification	biological_process	developmental process|multicellular organismal process	3	1755	28	19037	0.484033	0.73204	1.16221	Ooep;Ripply1;Ripply3
GO:0009887	animal organ morphogenesis	biological_process	developmental process|multicellular organismal process	8	1755	83	19037	0.502207	0.743341	1.04552	Ephb2;Gata4;Gmnn;Grem1;Slit3;Tgfb3;Tgm1;Vegfc
GO:0009888	tissue development	biological_process	developmental process	3	1755	27	19037	0.45951	0.728862	1.20525	Gata4;Postn;Wt1
GO:0009897	external side of plasma membrane	cellular_component	cell|cell part|membrane|membrane part	81	1755	288	19037	1.55533e-20	1.09606e-17	3.0508	Adam19;Adgre1;Btn2a2;Btnl9;Calr;Ccr4;Ccr5;Ccr7;Cd14;Cd2;Cd200r1;Cd22;Cd33;Cd3e;Cd40;Cd44;Cd55;Cd74;Cd80;Cd8b;Chrna4;Ctla4;Cxcl10;Cxcl9;Cxcr4;Eng;Ermap;Fas;Fcer1a;Fcer1g;Fcgr1a;Fcgr3a;Fgg;Glra1;Gpc4;Gpihbp1;Icam1;Icos;Il1r1;Il1rl1;Il2ra;Il2rb;Il2rg;Il6;Itga2;Itga4;Itga5;Itgal;Itgam;Itgav;Itgax;Itgb1;Klrk1;Ldlr;LOC102547056;Mfge8;Mog;Muc16;Ncam1;Nrg1;Osmr;P4hb;Pdcd1lg2;Ptprc;RT1-Bb;RT1-Db1;Rtn4rl2;…
GO:0009898	cytoplasmic side of plasma membrane	cellular_component	cell|cell part|membrane|membrane part	8	1755	56	19037	0.140489	0.411783	1.54961	Cd2;G6pd;Litaf;Msn;Nptx2;Ptpn22;Ptpn7;Ptprc
GO:0009913	epidermal cell differentiation	biological_process	cellular process|developmental process	1	1755	10	19037	0.619941	0.789613	1.08473	Spink5
GO:0009925	basal plasma membrane	cellular_component	cell|cell part|membrane|membrane part	1	1755	42	19037	0.982868	0.998453	0.258269	Met
GO:0009948	anterior/posterior axis specification	biological_process	developmental process|multicellular organismal process	1	1755	22	19037	0.88105	0.932065	0.493059	Aurka
GO:0009950	dorsal/ventral axis specification	biological_process	developmental process|multicellular organismal process	2	1755	9	19037	0.198499	0.505521	2.41051	Mdfi;Sfrp1
GO:0009952	anterior/posterior pattern specification	biological_process	developmental process|multicellular organismal process	6	1755	111	19037	0.949823	0.979438	0.58634	Aldh1a2;Emx2;Ifitm1;Pcsk5;Sfrp1;Zic3
GO:0009953	dorsal/ventral pattern formation	biological_process	developmental process|multicellular organismal process	3	1755	47	19037	0.820786	0.899354	0.69238	Bmpr1b;Edn1;En1
GO:0009954	proximal/distal pattern formation	biological_process	developmental process|multicellular organismal process	4	1755	25	19037	0.194303	0.505521	1.73557	Aldh1a2;Chsy1;En1;Grem1
GO:0009966	regulation of signal transduction	biological_process	biological regulation|cellular process|regulation of biological process|response to stimulus|signaling	7	1755	42	19037	0.0873976	0.327608	1.80788	Birc5;Gpc4;LOC100362023;Naip6;Nlrc4;Samsn1;Sash3
GO:0009967	positive regulation of signal transduction	biological_process	biological regulation|cellular process|positive regulation of biological process|regulation of biological process|response to stimulus|signaling	7	1755	40	19037	0.0706948	0.280787	1.89828	Adamts20;Fcrl2;Grb14;Hsh2d;Sh2b2;Sh2d2a;Sla
GO:0009968	negative regulation of signal transduction	biological_process	biological regulation|cellular process|negative regulation of biological process|regulation of biological process|response to stimulus|signaling	13	1755	85	19037	0.047128	0.231787	1.659	Axl;Csf1r;Ephb2;Inpp5d;Insrr;Met;Pdgfrb;Ret;Rgs16;Rgs18;Rgs19;Rgs8;Socs3
GO:0009972	cytidine deamination	biological_process	cellular process|metabolic process	2	1755	7	19037	0.130648	0.394341	3.09923	Apobec1;Apobec3b
GO:0009982	pseudouridine synthase activity	molecular_function	catalytic activity	1	1755	14	19037	0.741937	0.853711	0.774807	Rpusd2
GO:0009986	cell surface	cellular_component	cell|cell part	142	1755	632	19037	2.51306e-24	3.09924e-21	2.43721	Adam8;Adam9;Adamts9;Adgre4;Anxa1;Anxa2;Areg;Axl;Bgn;Btn2a2;C5ar1;Calr;Cav3;Ccr5;Ccr7;Cd14;Cd2;Cd38;Cd40;Cd44;Cd53;Cd55;Cd74;Cd80;Cd8b;Cdh11;Cdh24;Cftr;Ciita;Clec5a;Clic4;Cryab;Csf1r;Ctss;Ctsz;Cxcr2;Cxcr4;Dpp4;Eng;Eno1;Enpp3;Erp29;F2r;F3;Fap;Fas;Fcer1a;Fcer1g;Fcgr3a;Fcrl2;Fcrl3;Fgfbp1;Fgg;Folr2;Gpihbp1;Grem1;Havcr1;Hbegf;Hcst;Hist1h1a;Hmmr;Icam1;Il1a;Il1r1;Il1rl1;Il2ra;Il2rb;Itga2;Itga4;Itga5;Itga…
GO:0009987	cellular process	biological_process	NA	6	1755	16	19037	0.00216229	0.027923	4.06774	Brms1;Cdhr1;Fmnl1;Map1b;Rras2;Tubb5
GO:0010001	glial cell differentiation	biological_process	cellular process|developmental process|multicellular organismal process	3	1755	22	19037	0.331103	0.688406	1.47918	Gap43;Igf1;Nrg1
GO:0010008	endosome membrane	cellular_component	cell|cell part|membrane|organelle|organelle part	11	1755	104	19037	0.362705	0.688406	1.14731	Dio3;Grb14;Ncf4;Pmepa1;Ret;RT1-DMb;Slc11a1;Slc9b2;Tfrc;Tmem108;Treml4
GO:0010032	meiotic chromosome condensation	biological_process	cellular component organization or biogenesis|cellular process|reproduction|reproductive process	3	1755	5	19037	0.00678245	0.0621893	6.50838	Ncapd2;Smc2;Smc4
GO:0010033	response to organic substance	biological_process	response to stimulus	27	1755	160	19037	0.0015005	0.0219643	1.83048	Abcc4;Brca1;Btk;C1qb;Calr;Car2;Ces2h;Cyp1b1;Cyp2d1;Gatm;Hmgcs1;Igf1;Il10;Il1a;Mgp;Mmp9;Ngf;Pak1;Ptgs2;Ren;RT1-Db1;Spp1;Sqle;Tfrc;Tgfb1;Timp1;Tnfrsf10b
GO:0010035	response to inorganic substance	biological_process	response to stimulus	7	1755	34	19037	0.0328597	0.185891	2.23327	Casp12;Fas;Map1b;Ncam1;Pcsk1;Tfrc;Tnfrsf11b
GO:0010038	response to metal ion	biological_process	response to stimulus	3	1755	29	19037	0.508008	0.747392	1.12213	Gstm1;Lck;Tnnc1
GO:0010039	response to iron ion	biological_process	response to stimulus	3	1755	27	19037	0.45951	0.728862	1.20525	C1qa;Fn1;Tfrc
GO:0010041	response to iron(III) ion	biological_process	response to stimulus	2	1755	6	19037	0.0992091	0.333151	3.61576	Casp12;G6pd
GO:0010042	response to manganese ion	biological_process	response to stimulus	4	1755	16	19037	0.0533197	0.254377	2.71182	Adam9;Arg1;Ptgs2;Tfrc
GO:0010043	response to zinc ion	biological_process	response to stimulus	9	1755	52	19037	0.0464902	0.229107	1.87742	Apobec1;Arg1;Car2;Krt14;Lck;S100a8;S100a9;Slc39a13;Vim
GO:0010046	response to mycotoxin	biological_process	response to stimulus	4	1755	7	19037	0.00200526	0.0270142	6.19845	Abcb1b;Bak1;Havcr1;Lcn2
GO:0010107	potassium ion import	biological_process	cellular process|establishment of localization|localization	4	1755	37	19037	0.448403	0.713308	1.17268	Atp1a3;Atp1b1;Kcnj16;Kcnj2
GO:0010165	response to X-ray	biological_process	response to stimulus	5	1755	31	19037	0.152155	0.442299	1.74956	Anxa1;Pmaip1;Rad51;Tp73;Vwf
GO:0010181	FMN binding	molecular_function	binding	1	1755	15	19037	0.765745	0.867375	0.723153	Nos2
GO:0010193	response to ozone	biological_process	response to stimulus	6	1755	11	19037	0.000186994	0.0046122	5.91671	Edn1;Fn1;Il1a;Il1b;Muc5ac;Ngf
GO:0010212	response to ionizing radiation	biological_process	response to stimulus	13	1755	68	19037	0.00850016	0.0746108	2.07375	Abcb1b;Brca1;Ccr5;Icam1;Krt14;LOC100302465;Rad51;Rad51c;Rad54b;Rad54l;Rrm1;Ticrr;Top2a
GO:0010216	maintenance of DNA methylation	biological_process	cellular process|metabolic process	2	1755	6	19037	0.0992091	0.333151	3.61576	Hells;Uhrf1
GO:0010224	response to UV-B	biological_process	response to stimulus	1	1755	10	19037	0.619941	0.789613	1.08473	Ivl
GO:0010225	response to UV-C	biological_process	response to stimulus	2	1755	10	19037	0.233788	0.556728	2.16946	Bak1;Bcl3
GO:0010226	response to lithium ion	biological_process	response to stimulus	5	1755	22	19037	0.0462885	0.228799	2.46529	Acta1;Gria3;Gstm1;Igfbp2;Ptgs2
GO:0010243	response to organonitrogen compound	biological_process	response to stimulus	13	1755	67	19037	0.0074913	0.0676824	2.1047	Abcc4;Casp12;Ccne1;Cdk1;Drd1;Il1a;Il1b;Nnmt;Plcb1;Ptgs2;Tgfb2;Tp73;Ubd
GO:0010248	establishment or maintenance of transmembrane electrochemical gradient	biological_process	establishment of localization|localization	3	1755	14	19037	0.13238	0.394341	2.32442	Atp1a3;Atp1b1;Bak1
GO:0010259	multicellular organism aging	biological_process	developmental process|multicellular organismal process	3	1755	21	19037	0.304897	0.660045	1.54961	Acan;Cryab;Edn1
GO:0010269	response to selenium ion	biological_process	response to stimulus	4	1755	19	19037	0.0912949	0.330931	2.28364	Arg1;Txn1;Txnrd1;Vim
GO:0010288	response to lead ion	biological_process	response to stimulus	4	1755	41	19037	0.530289	0.748901	1.05827	Gstm1;Hsd3b6;Ncam1;Sparc
GO:0010314	phosphatidylinositol-5-phosphate binding	molecular_function	binding	1	1755	15	19037	0.765745	0.867375	0.723153	Sh3pxd2b
GO:0010332	response to gamma radiation	biological_process	response to stimulus	14	1755	46	19037	4.28999e-05	0.00146962	3.30135	Apobec1;Bak1;Ccl2;Ccl7;Cxcl1;Cxcl10;Cxcl2;Cxcl6;Fancd2;Il1a;Il1b;Ptprc;Socs3;Tp73
GO:0010369	chromocenter	cellular_component	cell|cell part|organelle|organelle part	5	1755	13	19037	0.00453078	0.0497781	4.17204	Aurkb;Cdca8;Esco2;Incenp;Trim66
GO:0010385	double-stranded methylated DNA binding	molecular_function	binding	2	1755	5	19037	0.070352	0.280328	4.33892	Egr1;Wt1
GO:0010389	regulation of G2/M transition of mitotic cell cycle	biological_process	biological regulation|cellular process|regulation of biological process	2	1755	14	19037	0.37477	0.688406	1.54961	Cenpf;Kif14
GO:0010390	histone monoubiquitination	biological_process	cellular component organization or biogenesis|cellular process|metabolic process	1	1755	12	19037	0.686821	0.824954	0.903941	Uhrf1
GO:0010447	response to acidic pH	biological_process	response to stimulus	6	1755	16	19037	0.00216229	0.027923	4.06774	Acan;Ctss;Gpr65;Lgmn;Met;Slc4a1
GO:0010457	centriole-centriole cohesion	biological_process	cellular component organization or biogenesis|cellular process	1	1755	10	19037	0.619941	0.789613	1.08473	Sgo1
GO:0010458	exit from mitosis	biological_process	cellular component organization or biogenesis|cellular process	1	1755	12	19037	0.686821	0.824954	0.903941	Ube2c
GO:0010460	positive regulation of heart rate	biological_process	biological regulation|multicellular organismal process|positive regulation of biological process|regulation of biological process	4	1755	23	19037	0.156633	0.447406	1.88649	Edn1;Gch1;Scn3b;Scn5a
GO:0010466	negative regulation of peptidase activity	biological_process	biological regulation|cellular process|metabolic process|negative regulation of biological process|regulation of biological process	4	1755	25	19037	0.194303	0.505521	1.73557	Serpinb3a;Slpil2;Wfdc18;Wfdc21
GO:0010467	gene expression	biological_process	metabolic process	3	1755	12	19037	0.0916384	0.330931	2.71182	Fas;Fmn1;Nox4
GO:0010468	regulation of gene expression	biological_process	biological regulation|metabolic process|regulation of biological process	33	1755	273	19037	0.0652259	0.280328	1.31121	Atp1b1;Bcl11b;Cdk1;Chek1;Emx2;En1;Eomes;Fas;Gata4;Gdnf;Igf1;Il10;Il2rg;Lbh;Mapk10;Mcph1;Nfe2;Nlrp3;Nov;Pak1;Phgdh;Plagl1;Pthlh;RGD1560020_predicted;Ripply1;Rspo1;Slc4a5;Tcf19;Tgfb1;Tp73;Tsku;Wt1;Zc3h12a
GO:0010469	regulation of signaling receptor activity	biological_process	biological regulation|cellular process|regulation of biological process|response to stimulus|signaling	73	1755	389	19037	3.01702e-09	4.25227e-07	2.03561	Apln;Areg;Bdnf;Bmp3;Ccl12;Ccl17;Ccl2;Ccl22;Ccl5;Ccl7;Crlf1;Ctgf;Cxcl1;Cxcl10;Cxcl11;Cxcl13;Cxcl2;Cxcl3;Cxcl6;Cxcl9;Edn1;Fgf18;Fgf9;Figf;Gdf15;Gdf5;Gdf6;Gdnf;Gmfg;Gpnmb;Hbegf;Igf1;Il11;Il17b;Il17f;Il18;Il1a;Il1b;Il1f10;Il36b;Il6;Inhba;Inhbb;Lif;LOC290595;Manf;Muc4;Ngf;Nov;Nrg1;Pcsk9;Penk;Plau;Pthlh;Reg1a;Retnlg;Scg2;Sectm1a;Sectm1b;Serpine1;Spp1;Stc2;Tg;Tgfb1;Tgfb2;Tgfb3;Thbs4;Timp1;Tnfrsf11b;Trh;…
GO:0010470	regulation of gastrulation	biological_process	biological regulation|developmental process|multicellular organismal process|regulation of biological process	1	1755	10	19037	0.619941	0.789613	1.08473	Crb2
GO:0010498	proteasomal protein catabolic process	biological_process	cellular process|metabolic process	1	1755	33	19037	0.959015	0.98594	0.328706	Pmaip1
GO:0010501	RNA secondary structure unwinding	biological_process	cellular process|metabolic process	1	1755	46	19037	0.988375	1	0.235811	Ddx43
GO:0010506	regulation of autophagy	biological_process	biological regulation|cellular process|metabolic process|regulation of biological process	3	1755	52	19037	0.869787	0.926308	0.625805	Dram1;LOC100912399;Tmem150b
GO:0010507	negative regulation of autophagy	biological_process	biological regulation|cellular process|metabolic process|negative regulation of biological process|regulation of biological process	2	1755	37	19037	0.867453	0.925897	0.58634	Gata4;Ptpn22
GO:0010508	positive regulation of autophagy	biological_process	biological regulation|cellular process|metabolic process|positive regulation of biological process|regulation of biological process	4	1755	45	19037	0.605715	0.789613	0.964204	Mefv;Tlr9;Tp53inp2;Zc3h12a
GO:0010518	positive regulation of phospholipase activity	biological_process	biological regulation	1	1755	8	19037	0.53879	0.748901	1.35591	Cyr61
GO:0010524	positive regulation of calcium ion transport into cytosol	biological_process	biological regulation|cellular process|establishment of localization|localization|positive regulation of biological process|regulation of biological process	2	1755	16	19037	0.441554	0.704458	1.35591	Bak1;P2rx4
GO:0010529	negative regulation of transposition	biological_process	biological regulation|cellular process|negative regulation of biological process|regulation of biological process	2	1755	14	19037	0.37477	0.688406	1.54961	Apobec3b;Mybl1
GO:0010543	regulation of platelet activation	biological_process	biological regulation|cellular process|multicellular organismal process|regulation of biological process|response to stimulus	2	1755	5	19037	0.070352	0.280328	4.33892	Fcer1g;Syk
GO:0010564	regulation of cell cycle process	biological_process	biological regulation|cellular process|regulation of biological process	2	1755	7	19037	0.130648	0.394341	3.09923	Hmga2;Sfrp1
GO:0010569	regulation of double-strand break repair via homologous recombination	biological_process	biological regulation|cellular process|metabolic process|regulation of biological process|response to stimulus	4	1755	17	19037	0.0648145	0.280328	2.5523	Chek1;Fignl1;Rad51;Rad51ap1
GO:0010571	positive regulation of nuclear cell cycle DNA replication	biological_process	biological regulation|cellular process|metabolic process|positive regulation of biological process|regulation of biological process	1	1755	5	19037	0.38347	0.688406	2.16946	Cdc7
GO:0010572	positive regulation of platelet activation	biological_process	biological regulation|cellular process|multicellular organismal process|positive regulation of biological process|regulation of biological process|response to stimulus	2	1755	5	19037	0.070352	0.280328	4.33892	Plek;Selp
GO:0010575	positive regulation of vascular endothelial growth factor production	biological_process	biological regulation|multicellular organismal process|positive regulation of biological process|regulation of biological process	11	1755	25	19037	5.20954e-06	0.000265788	4.77281	Brca1;C3;C3ar1;C5ar1;Ccbe1;Cyp1b1;Gata4;Il1a;Il1b;Ptgs2;Sulf1
GO:0010591	regulation of lamellipodium assembly	biological_process	biological regulation|cellular component organization or biogenesis|cellular process|regulation of biological process	1	1755	13	19037	0.715711	0.839021	0.834407	Was
GO:0010592	positive regulation of lamellipodium assembly	biological_process	biological regulation|cellular component organization or biogenesis|cellular process|positive regulation of biological process|regulation of biological process	3	1755	22	19037	0.331103	0.688406	1.47918	Cfl1;Fscn1;Rac2
GO:0010594	regulation of endothelial cell migration	biological_process	biological regulation|cellular process|localization|locomotion|multicellular organismal process|regulation of biological process	1	1755	5	19037	0.38347	0.688406	2.16946	Bmper
GO:0010595	positive regulation of endothelial cell migration	biological_process	biological regulation|cellular process|localization|locomotion|multicellular organismal process|positive regulation of biological process|regulation of biological process	7	1755	44	19037	0.10614	0.351304	1.72571	Angpt4;Calr;Ccbe1;Foxc2;Sparc;Thbs1;Zc3h12a
GO:0010596	negative regulation of endothelial cell migration	biological_process	biological regulation|cellular process|localization|locomotion|multicellular organismal process|negative regulation of biological process|regulation of biological process	3	1755	22	19037	0.331103	0.688406	1.47918	Adamts9;Slit2;Thbs1
GO:0010613	positive regulation of cardiac muscle hypertrophy	biological_process	biological regulation|multicellular organismal process|positive regulation of biological process|regulation of biological process|response to stimulus	3	1755	23	19037	0.357274	0.688406	1.41486	Edn1;Igf1;Nr4a3
GO:0010614	negative regulation of cardiac muscle hypertrophy	biological_process	biological regulation|multicellular organismal process|negative regulation of biological process|regulation of biological process|response to stimulus	2	1755	12	19037	0.304935	0.660045	1.80788	Cav3;P2rx4
GO:0010628	positive regulation of gene expression	biological_process	biological regulation|metabolic process|positive regulation of biological process|regulation of biological process	74	1755	433	19037	1.35199e-07	1.1304e-05	1.85381	Acta1;Actg2;Aldh1a2;Brca1;Calr;Ccl5;Ccr5;Cd3e;Cd44;Cdk1;Cebpe;Cnn2;Ctgf;Drd1;E2f1;Egr1;Eng;Ephb2;Erp29;Etv4;Fgf9;Fn1;Gata4;Gja1;Hmga2;Hmgb2;Hmgb2l1;Igf1;Ikzf1;Il18;Il1a;Il1b;Il2rg;Il6;Inhba;Iqgap3;Lck;Lcn2;Ldlr;Lgals9;Lif;Lrrc32;Met;Msn;Mycn;Nfil3;Ngf;Nrg1;Pdcd5;Plaur;Prdm1;Ptgfr;Ptpn22;Ramp3;Reg1a;Ret;Rgcc;Serpinb9;Serpine1;Sfrp4;Sh3pxd2b;Slc11a1;Slc26a9;Sox11;Stap1;Tgfb1;Tgfb2;Tgfb3;Tlr2;Tlr9;T…
GO:0010629	negative regulation of gene expression	biological_process	biological regulation|metabolic process|negative regulation of biological process|regulation of biological process	43	1755	235	19037	9.91986e-06	0.000453099	1.98482	Aif1;Apln;Bak1;Brip1;C1qtnf3;Ccnb1;Cd3e;Cryab;Ctgf;Eng;Erp29;Gata4;Gja1;Heyl;Hmgb2;Hmgb2l1;Igf1;Il1b;Iqgap3;Ldlr;Lgals9;Met;Msr1;Mycn;Noct;Nos2;Olr1;Pgr;Picalm;Prdm1;Ptpn22;Rbl1;Serpine1;Sfmbt2;Sfrp1;Slit2;Slit3;Sox11;Stc2;Tgfb1;Tgfb2;Ttbk1;Zc3h12a
GO:0010634	positive regulation of epithelial cell migration	biological_process	biological regulation|cellular process|localization|locomotion|multicellular organismal process|positive regulation of biological process|regulation of biological process	2	1755	37	19037	0.867453	0.925897	0.58634	Itga2;Tgfb2
GO:0010642	negative regulation of platelet-derived growth factor receptor signaling pathway	biological_process	biological regulation|cellular process|negative regulation of biological process|regulation of biological process|response to stimulus|signaling	1	1755	9	19037	0.581326	0.772752	1.20525	Ptgir
GO:0010644	cell communication by electrical coupling	biological_process	cellular process	3	1755	5	19037	0.00678245	0.0621893	6.50838	Dbn1;Gja1;Gja5
GO:0010656	negative regulation of muscle cell apoptotic process	biological_process	biological regulation|cellular process|negative regulation of biological process|regulation of biological process	3	1755	12	19037	0.0916384	0.330931	2.71182	Hmox1;Igf1;Zc3h12a
GO:0010666	positive regulation of cardiac muscle cell apoptotic process	biological_process	biological regulation|cellular process|positive regulation of biological process|regulation of biological process	2	1755	19	19037	0.533766	0.748901	1.14182	Cxcr2;Fndc1
GO:0010667	negative regulation of cardiac muscle cell apoptotic process	biological_process	biological regulation|cellular process|negative regulation of biological process|regulation of biological process	3	1755	32	19037	0.576191	0.772752	1.01693	Gata4;Nrg1;Pax8
GO:0010669	epithelial structure maintenance	biological_process	biological regulation|multicellular organismal process	1	1755	6	19037	0.440322	0.704458	1.80788	Cxadr
GO:0010694	positive regulation of alkaline phosphatase activity	biological_process	biological regulation|cellular process|metabolic process|positive regulation of biological process|regulation of biological process	1	1755	6	19037	0.440322	0.704458	1.80788	Itga2
GO:0010717	regulation of epithelial to mesenchymal transition	biological_process	biological regulation|cellular process|developmental process|multicellular organismal process|regulation of biological process	1	1755	13	19037	0.715711	0.839021	0.834407	Grem1
GO:0010718	positive regulation of epithelial to mesenchymal transition	biological_process	biological regulation|cellular process|developmental process|multicellular organismal process|positive regulation of biological process|regulation of biological process	9	1755	43	19037	0.0149482	0.109732	2.27036	Col1a1;Crb2;Il1b;Loxl2;Rgcc;Snai1;Tgfb1;Tgfb2;Tgfb3
GO:0010719	negative regulation of epithelial to mesenchymal transition	biological_process	biological regulation|cellular process|developmental process|multicellular organismal process|negative regulation of biological process|regulation of biological process	2	1755	24	19037	0.662814	0.815174	0.903941	Ldlrad4;Sfrp1
GO:0010737	protein kinase A signaling	biological_process	biological regulation|cellular process|regulation of biological process|response to stimulus|signaling	2	1755	9	19037	0.198499	0.505521	2.41051	Lcp1;Rab13
GO:0010739	positive regulation of protein kinase A signaling	biological_process	biological regulation|cellular process|positive regulation of biological process|regulation of biological process|response to stimulus|signaling	2	1755	9	19037	0.198499	0.505521	2.41051	Mc1r;Ramp3
GO:0010742	macrophage derived foam cell differentiation	biological_process	cellular process|developmental process	1	1755	5	19037	0.38347	0.688406	2.16946	Soat1
GO:0010744	positive regulation of macrophage derived foam cell differentiation	biological_process	biological regulation|cellular process|developmental process|positive regulation of biological process|regulation of biological process	2	1755	11	19037	0.269385	0.609577	1.97224	Il18;Msr1
GO:0010745	negative regulation of macrophage derived foam cell differentiation	biological_process	biological regulation|cellular process|developmental process|negative regulation of biological process|regulation of biological process	1	1755	8	19037	0.53879	0.748901	1.35591	Itgav
GO:0010756	positive regulation of plasminogen activation	biological_process	biological regulation|cellular process|metabolic process|positive regulation of biological process|regulation of biological process	1	1755	7	19037	0.491934	0.73204	1.54961	Eno1
GO:0010757	negative regulation of plasminogen activation	biological_process	biological regulation|cellular process|metabolic process|negative regulation of biological process|regulation of biological process	3	1755	6	19037	0.0126377	0.096654	5.42365	Ctsz;Serpine1;Thbs1
GO:0010759	positive regulation of macrophage chemotaxis	biological_process	biological regulation|cellular process|immune system process|localization|locomotion|positive regulation of biological process|regulation of biological process|response to stimulus	7	1755	17	19037	0.000473593	0.0091617	4.46653	C3ar1;C5ar1;Ccl2;Ccl5;Cmklr1;Thbs1;Tnfsf18
GO:0010760	negative regulation of macrophage chemotaxis	biological_process	biological regulation|cellular process|immune system process|localization|locomotion|negative regulation of biological process|regulation of biological process|response to stimulus	2	1755	7	19037	0.130648	0.394341	3.09923	Slamf8;Stap1
GO:0010761	fibroblast migration	biological_process	cellular process|localization|locomotion	1	1755	11	19037	0.654997	0.810409	0.986118	Nov
GO:0010763	positive regulation of fibroblast migration	biological_process	biological regulation|cellular process|localization|locomotion|positive regulation of biological process|regulation of biological process	3	1755	17	19037	0.202394	0.507839	1.91423	Pak1;Tgfb1;Thbs1
GO:0010764	negative regulation of fibroblast migration	biological_process	biological regulation|cellular process|localization|locomotion|negative regulation of biological process|regulation of biological process	2	1755	8	19037	0.163948	0.448809	2.71182	Cygb;Has1
GO:0010765	positive regulation of sodium ion transport	biological_process	biological regulation|establishment of localization|localization|positive regulation of biological process|regulation of biological process	3	1755	24	19037	0.383295	0.688406	1.35591	Cxcl1;Scn3b;Scn5a
GO:0010800	positive regulation of peptidyl-threonine phosphorylation	biological_process	biological regulation|cellular process|metabolic process|positive regulation of biological process|regulation of biological process	6	1755	28	19037	0.0392095	0.209556	2.32442	Cemip;Chi3l1;Met;Plk1;Sphk1;Tgfb1
GO:0010801	negative regulation of peptidyl-threonine phosphorylation	biological_process	biological regulation|cellular process|metabolic process|negative regulation of biological process|regulation of biological process	1	1755	15	19037	0.765745	0.867375	0.723153	Met
GO:0010803	regulation of tumor necrosis factor-mediated signaling pathway	biological_process	biological regulation|cellular process|regulation of biological process|response to stimulus|signaling	2	1755	7	19037	0.130648	0.394341	3.09923	Sphk1;Syk
GO:0010804	negative regulation of tumor necrosis factor-mediated signaling pathway	biological_process	biological regulation|cellular process|negative regulation of biological process|regulation of biological process|response to stimulus|signaling	2	1755	14	19037	0.37477	0.688406	1.54961	F2rl1;Traip
GO:0010811	positive regulation of cell-substrate adhesion	biological_process	biological adhesion|biological regulation|positive regulation of biological process|regulation of biological process	13	1755	45	19037	0.000145003	0.0038875	3.13366	Alox15;Ccdc80;Col8a1;Cyr61;Dbn1;Emilin1;Fbln2;Itga5;Itgb1;Ndnf;Nid1;Spp1;Thbs1
GO:0010812	negative regulation of cell-substrate adhesion	biological_process	biological adhesion|biological regulation|cellular process|negative regulation of biological process|regulation of biological process	2	1755	14	19037	0.37477	0.688406	1.54961	Col1a1;Lgals1
GO:0010818	T cell chemotaxis	biological_process	cellular process|immune system process|localization|locomotion|response to stimulus	4	1755	8	19037	0.0037183	0.0431585	5.42365	Cxcl10;Cxcl11;Cxcl9;Gpr183
GO:0010820	positive regulation of T cell chemotaxis	biological_process	biological regulation|cellular process|immune system process|localization|locomotion|positive regulation of biological process|regulation of biological process|response to stimulus	2	1755	9	19037	0.198499	0.505521	2.41051	Ccl5;Cxcl13
GO:0010824	regulation of centrosome duplication	biological_process	biological regulation|cellular component organization or biogenesis|cellular process|regulation of biological process	1	1755	18	19037	0.824788	0.899354	0.602627	Gen1
GO:0010827	regulation of glucose transmembrane transport	biological_process	biological regulation|establishment of localization|localization|regulation of biological process	4	1755	6	19037	0.000927189	0.0154001	7.23153	Edn1;Ednra;Ffar4;Trib3
GO:0010828	positive regulation of glucose transmembrane transport	biological_process	biological regulation|establishment of localization|localization|positive regulation of biological process|regulation of biological process	3	1755	10	19037	0.0573429	0.263118	3.25419	C3;Met;Nr4a3
GO:0010831	positive regulation of myotube differentiation	biological_process	biological regulation|cellular process|developmental process|positive regulation of biological process|regulation of biological process	1	1755	11	19037	0.654997	0.810409	0.986118	Cav3
GO:0010832	negative regulation of myotube differentiation	biological_process	biological regulation|cellular process|developmental process|negative regulation of biological process|regulation of biological process	2	1755	16	19037	0.441554	0.704458	1.35591	Bdnf;Nov
GO:0010833	telomere maintenance via telomere lengthening	biological_process	biological regulation|cellular component organization or biogenesis|cellular process|metabolic process	1	1755	7	19037	0.491934	0.73204	1.54961	Rad51
GO:0010837	regulation of keratinocyte proliferation	biological_process	biological regulation|cellular process|regulation of biological process	1	1755	8	19037	0.53879	0.748901	1.35591	Bcl11b
GO:0010838	positive regulation of keratinocyte proliferation	biological_process	biological regulation|cellular process|positive regulation of biological process|regulation of biological process	3	1755	10	19037	0.0573429	0.263118	3.25419	Has2;Reg3g;Tgm1
GO:0010839	negative regulation of keratinocyte proliferation	biological_process	biological regulation|cellular process|negative regulation of biological process|regulation of biological process	1	1755	13	19037	0.715711	0.839021	0.834407	Cd109
GO:0010842	retina layer formation	biological_process	developmental process|multicellular organismal process	2	1755	22	19037	0.614978	0.789613	0.986118	Fjx1;Prom1
GO:0010862	positive regulation of pathway-restricted SMAD protein phosphorylation	biological_process	biological regulation|cellular process|metabolic process|positive regulation of biological process|regulation of biological process|response to stimulus|signaling	11	1755	49	19037	0.00431171	0.0485609	2.43511	Bmp3;Eng;Gdf15;Gdf5;Gdf6;Inhba;Inhbb;Lgals9;Tgfb1;Tgfb2;Tgfb3
GO:0010863	positive regulation of phospholipase C activity	biological_process	biological regulation	2	1755	8	19037	0.163948	0.448809	2.71182	Pdgfrb;Ptafr
GO:0010867	positive regulation of triglyceride biosynthetic process	biological_process	biological regulation|cellular process|metabolic process|positive regulation of biological process|regulation of biological process	2	1755	17	19037	0.473442	0.73204	1.27615	Apoc3;Ldlr
GO:0010870	positive regulation of receptor biosynthetic process	biological_process	biological regulation|cellular process|metabolic process|positive regulation of biological process|regulation of biological process	1	1755	6	19037	0.440322	0.704458	1.80788	Edn1
GO:0010873	positive regulation of cholesterol esterification	biological_process	biological regulation|cellular process|metabolic process|positive regulation of biological process|regulation of biological process	1	1755	8	19037	0.53879	0.748901	1.35591	Stard4
GO:0010882	regulation of cardiac muscle contraction by calcium ion signaling	biological_process	biological regulation|cellular process|multicellular organismal process|regulation of biological process|response to stimulus|signaling	1	1755	8	19037	0.53879	0.748901	1.35591	Atp1b1
GO:0010884	positive regulation of lipid storage	biological_process	biological regulation|localization|positive regulation of biological process|regulation of biological process	2	1755	10	19037	0.233788	0.556728	2.16946	C3;Zc3h12a
GO:0010886	positive regulation of cholesterol storage	biological_process	biological regulation|localization|positive regulation of biological process|regulation of biological process	1	1755	7	19037	0.491934	0.73204	1.54961	Msr1
GO:0010888	negative regulation of lipid storage	biological_process	biological regulation|localization|negative regulation of biological process|regulation of biological process	1	1755	7	19037	0.491934	0.73204	1.54961	Itgav
GO:0010894	negative regulation of steroid biosynthetic process	biological_process	biological regulation|metabolic process|negative regulation of biological process|regulation of biological process	1	1755	6	19037	0.440322	0.704458	1.80788	Hrh1
GO:0010898	positive regulation of triglyceride catabolic process	biological_process	biological regulation|cellular process|metabolic process|positive regulation of biological process|regulation of biological process	1	1755	11	19037	0.654997	0.810409	0.986118	Ldlr
GO:0010906	regulation of glucose metabolic process	biological_process	biological regulation|cellular process|metabolic process|regulation of biological process	2	1755	24	19037	0.662814	0.815174	0.903941	Fgl1;Igfbp4
GO:0010907	positive regulation of glucose metabolic process	biological_process	biological regulation|cellular process|metabolic process|positive regulation of biological process|regulation of biological process	1	1755	9	19037	0.581326	0.772752	1.20525	Pmaip1
GO:0010917	negative regulation of mitochondrial membrane potential	biological_process	biological regulation	1	1755	10	19037	0.619941	0.789613	1.08473	Pmaip1
GO:0010922	positive regulation of phosphatase activity	biological_process	biological regulation|cellular process|metabolic process|positive regulation of biological process|regulation of biological process	1	1755	6	19037	0.440322	0.704458	1.80788	Ripk3
GO:0010923	negative regulation of phosphatase activity	biological_process	biological regulation|cellular process|metabolic process|negative regulation of biological process|regulation of biological process	1	1755	55	19037	0.995144	1	0.197224	Pkmyt1
GO:0010936	negative regulation of macrophage cytokine production	biological_process	biological regulation|immune system process|multicellular organismal process|negative regulation of biological process|regulation of biological process|response to stimulus	3	1755	5	19037	0.00678245	0.0621893	6.50838	Tgfb1;Tgfb2;Tgfb3
GO:0010940	positive regulation of necrotic cell death	biological_process	biological regulation|cellular process|positive regulation of biological process|regulation of biological process	1	1755	7	19037	0.491934	0.73204	1.54961	Ripk3
GO:0010941	regulation of cell death	biological_process	biological regulation|cellular process|regulation of biological process	3	1755	15	19037	0.154716	0.444764	2.16946	Cryab;Ier3;Ocm2
GO:0010942	positive regulation of cell death	biological_process	biological regulation|cellular process|positive regulation of biological process|regulation of biological process	12	1755	63	19037	0.0115438	0.0945938	2.06615	Ctgf;Cysltr2;Egr1;Fas;Hbb;Il1b;Mycn;Ptgs2;Ramp3;Txnrd1;Ucp2;Zc3h12a
GO:0010944	negative regulation of transcription by competitive promoter binding	biological_process	biological regulation|cellular process|metabolic process|negative regulation of biological process|regulation of biological process	1	1755	9	19037	0.581326	0.772752	1.20525	Muc1
GO:0010951	negative regulation of endopeptidase activity	biological_process	biological regulation|cellular process|metabolic process|negative regulation of biological process|regulation of biological process	22	1755	139	19037	0.00844624	0.0742697	1.71684	A2ml1;C3;Cd109;Crb2;Fetub;LOC103689965;Lxn;Ngf;Pttg1;Serpina3n;Serpinb10;Serpinb11;Serpinb2;Serpinb3a;Serpinb9;Serpine1;Serpinh1;Slpi;Tfpi2;Timp1;Wfdc1;Wfdc15b
GO:0010952	positive regulation of peptidase activity	biological_process	biological regulation|cellular process|metabolic process|positive regulation of biological process|regulation of biological process	2	1755	11	19037	0.269385	0.609577	1.97224	Fn1;Pcolce
GO:0010954	positive regulation of protein processing	biological_process	biological regulation|cellular process|metabolic process|positive regulation of biological process|regulation of biological process	1	1755	14	19037	0.741937	0.853711	0.774807	Ccbe1
GO:0010955	negative regulation of protein processing	biological_process	biological regulation|cellular process|metabolic process|negative regulation of biological process|regulation of biological process	2	1755	12	19037	0.304935	0.660045	1.80788	Chac1;Il1r2
GO:0010971	positive regulation of G2/M transition of mitotic cell cycle	biological_process	biological regulation|cellular process|positive regulation of biological process|regulation of biological process	5	1755	22	19037	0.0462885	0.228799	2.46529	Ccnb1;Cdc7;Cdk1;Dtl;Rad51c
GO:0010972	negative regulation of G2/M transition of mitotic cell cycle	biological_process	biological regulation|cellular process|negative regulation of biological process|regulation of biological process	1	1755	8	19037	0.53879	0.748901	1.35591	Chek1
GO:0010975	regulation of neuron projection development	biological_process	biological regulation|cellular component organization or biogenesis|cellular process|developmental process|multicellular organismal process|regulation of biological process	2	1755	28	19037	0.744013	0.854243	0.774807	Grid2;Sfrp1
GO:0010976	positive regulation of neuron projection development	biological_process	biological regulation|cellular component organization or biogenesis|cellular process|developmental process|multicellular organismal process|positive regulation of biological process|regulation of biological process	24	1755	153	19037	0.00686424	0.0628225	1.70154	Adamts1;Ankrd1;Camk2b;Cxcl6;Dbn1;Dpysl3;Dynlt1;Fam150a;Fes;Htr7;Il6;Itgb1;Lif;Lyn;Met;Ndnf;Ngf;Nme2;Nrg1;P3h1;Ptk7;Ret;S100a9;Sphk1
GO:0010977	negative regulation of neuron projection development	biological_process	biological regulation|cellular component organization or biogenesis|cellular process|developmental process|multicellular organismal process|negative regulation of biological process|regulation of biological process	9	1755	82	19037	0.34293	0.688406	1.19056	Cd38;Crmp1;Ctsz;Dpysl3;Lgals1;Ntm;Rtn4rl2;Tnfrsf8;Vim
GO:0010989	negative regulation of low-density lipoprotein particle clearance	biological_process	biological regulation|multicellular organismal process|negative regulation of biological process|regulation of biological process	2	1755	5	19037	0.070352	0.280328	4.33892	Apoc3;Pcsk9
GO:0010991	negative regulation of SMAD protein complex assembly	biological_process	biological regulation|cellular component organization or biogenesis|cellular process|negative regulation of biological process|regulation of biological process|response to stimulus|signaling	2	1755	5	19037	0.070352	0.280328	4.33892	Ldlrad4;Pmepa1
GO:0010994	free ubiquitin chain polymerization	biological_process	biological regulation|cellular component organization or biogenesis|cellular process	1	1755	5	19037	0.38347	0.688406	2.16946	Ube2c
GO:0010996	response to auditory stimulus	biological_process	response to stimulus	4	1755	26	19037	0.214094	0.531251	1.66881	Adora1;Bdnf;Cxcl10;Il6
GO:0010997	anaphase-promoting complex binding	molecular_function	binding	3	1755	5	19037	0.00678245	0.0621893	6.50838	Cdc20;Clspn;Plk1
GO:0012501	programmed cell death	biological_process	cellular process	3	1755	14	19037	0.13238	0.394341	2.32442	Gsdmc;Pdcd5;Trib3
GO:0012505	endomembrane system	cellular_component	cell|cell part	11	1755	180	19037	0.949767	0.979438	0.66289	Adora1;Adora2a;Adprhl1;Cdc42ep1;Cnpy4;Drd1;Jak3;Rab13;Rab32;Trpv2;Vmp1
GO:0012506	vesicle membrane	cellular_component	membrane|organelle|organelle part	2	1755	32	19037	0.807845	0.889729	0.677956	Nos2;Was
GO:0014002	astrocyte development	biological_process	cellular process|developmental process|multicellular organismal process	4	1755	17	19037	0.0648145	0.280328	2.5523	Drd1;S100a8;S100a9;Vim
GO:0014003	oligodendrocyte development	biological_process	cellular process|developmental process|multicellular organismal process	6	1755	31	19037	0.0606463	0.27624	2.09948	Gstp1;Lyn;Met;Myrf;Sox11;Tgfb1
GO:0014009	glial cell proliferation	biological_process	cellular process|developmental process|multicellular organismal process	4	1755	9	19037	0.00620695	0.0621893	4.82102	Areg;Dbi;Penk;Sox11
GO:0014012	peripheral nervous system axon regeneration	biological_process	cellular component organization or biogenesis|cellular process|developmental process|multicellular organismal process|response to stimulus	5	1755	12	19037	0.00301526	0.0372789	4.51971	Calu;Map1b;Mmp2;Ncam1;Tnc
GO:0014031	mesenchymal cell development	biological_process	cellular process|developmental process|multicellular organismal process	1	1755	7	19037	0.491934	0.73204	1.54961	Heyl
GO:0014032	neural crest cell development	biological_process	cellular process|developmental process|multicellular organismal process	5	1755	22	19037	0.0462885	0.228799	2.46529	Aldh1a2;Edn1;Ednra;Foxc2;Sox11
GO:0014037	Schwann cell differentiation	biological_process	cellular process|developmental process|multicellular organismal process	1	1755	11	19037	0.654997	0.810409	0.986118	Egr2
GO:0014042	positive regulation of neuron maturation	biological_process	biological regulation|cellular process|developmental process|multicellular organismal process|positive regulation of biological process|regulation of biological process	2	1755	6	19037	0.0992091	0.333151	3.61576	Ngf;Ret
GO:0014047	glutamate secretion	biological_process	cellular process|establishment of localization|localization	1	1755	7	19037	0.491934	0.73204	1.54961	Bdnf
GO:0014049	positive regulation of glutamate secretion	biological_process	biological regulation|cellular process|establishment of localization|localization|positive regulation of biological process|regulation of biological process	1	1755	12	19037	0.686821	0.824954	0.903941	Adora2a
GO:0014050	negative regulation of glutamate secretion	biological_process	biological regulation|cellular process|establishment of localization|localization|negative regulation of biological process|regulation of biological process	3	1755	9	19037	0.043019	0.217503	3.61576	Adora1;Il1b;Trh
GO:0014054	positive regulation of gamma-aminobutyric acid secretion	biological_process	biological regulation|establishment of localization|localization|positive regulation of biological process|regulation of biological process	1	1755	7	19037	0.491934	0.73204	1.54961	Trh
GO:0014059	regulation of dopamine secretion	biological_process	biological regulation|cellular process|establishment of localization|localization|regulation of biological process	3	1755	23	19037	0.357274	0.688406	1.41486	Adra1d;Chrna4;Htr2a
GO:0014061	regulation of norepinephrine secretion	biological_process	biological regulation|cellular process|establishment of localization|localization|regulation of biological process	1	1755	7	19037	0.491934	0.73204	1.54961	Adora2a
GO:0014063	negative regulation of serotonin secretion	biological_process	biological regulation|cellular process|establishment of localization|localization|negative regulation of biological process|regulation of biological process	2	1755	5	19037	0.070352	0.280328	4.33892	Cd300a;Htr7
GO:0014065	phosphatidylinositol 3-kinase signaling	biological_process	biological regulation|cellular process|regulation of biological process|response to stimulus|signaling	5	1755	35	19037	0.216971	0.535694	1.54961	Edn1;Htr2a;Igf1;Pik3cg;Pik3r5
GO:0014066	regulation of phosphatidylinositol 3-kinase signaling	biological_process	biological regulation|cellular process|regulation of biological process|response to stimulus|signaling	1	1755	9	19037	0.581326	0.772752	1.20525	Entpd5
GO:0014067	negative regulation of phosphatidylinositol 3-kinase signaling	biological_process	biological regulation|cellular process|negative regulation of biological process|regulation of biological process|response to stimulus|signaling	1	1755	15	19037	0.765745	0.867375	0.723153	Btn2a2
GO:0014068	positive regulation of phosphatidylinositol 3-kinase signaling	biological_process	biological regulation|cellular process|positive regulation of biological process|regulation of biological process|response to stimulus|signaling	14	1755	68	19037	0.00322305	0.0389689	2.23327	Ccl5;F2r;F2rl1;Fgr;Hcls1;Hcst;Igf1;Il18;Ncf1;Nrg1;Pdgfrb;Ptpn6;Selp;Tgfb2
GO:0014069	postsynaptic density	cellular_component	cell|cell part|organelle|synapse|synapse part	29	1755	265	19037	0.190035	0.504817	1.18706	Add2;Adora1;Adora2a;Anks1b;Camk2b;Cryab;Dbn1;Erc2;Gap43;Gria3;Grid2;Grip1;Il1r1;Itga8;Kcnab2;Lrp8;Lyn;Map1b;Mapk10;Met;P2rx4;Pak1;Pdlim5;Picalm;Rgs14;Sh2d5;Snap91;Syndig1;Tmem108
GO:0014070	response to organic cyclic compound	biological_process	response to stimulus	53	1755	268	19037	7.46157e-08	6.69235e-06	2.14517	Abcb1b;Abcc4;Acan;Anxa1;Areg;Bak1;Calu;Ccl5;Ccne1;Cd44;Cdk1;Cdkn2b;Cfl1;Ctgf;Cyp1b1;Cyp2d1;Drd1;Ednra;Ednrb;Foxj1;G6pd;Hmgcs1;Icam1;Idh1;Igf1;Il1a;Il1b;Il6;Inhbb;Itga2;Ldha;Lyn;Met;Mki67;Mmp9;Ncf2;Ngf;Nqo1;Pcsk1;Pdgfrb;Ptgs2;Rad51;Ran;Reg1a;Scn5a;Selp;Sfrp1;Socs3;Sphk1;Tgfb1;Tnfrsf10b;Trh;Tyms
GO:0014074	response to purine-containing compound	biological_process	response to stimulus	3	1755	7	19037	0.0206121	0.134142	4.64884	Ccne1;Hmgcs1;Trpm2
GO:0014075	response to amine	biological_process	response to stimulus	4	1755	22	19037	0.138926	0.40793	1.97224	Arg1;Cdk1;Itga2;Sphk1
GO:0014704	intercalated disc	cellular_component	cell junction	13	1755	56	19037	0.00144144	0.0215474	2.51812	Atp1b1;Cav3;Cxadr;Des;Gja1;Gja5;Itgb1;Kcnj2;Myh1;Pak1;Scn5a;Slc2a1;Slc4a1
GO:0014731	spectrin-associated cytoskeleton	cellular_component	cell|cell part|organelle	1	1755	6	19037	0.440322	0.704458	1.80788	Rhbg
GO:0014808	release of sequestered calcium ion into cytosol by sarcoplasmic reticulum	biological_process	biological regulation|cellular process|establishment of localization|localization|negative regulation of biological process|regulation of biological process	1	1755	7	19037	0.491934	0.73204	1.54961	Ccr5
GO:0014823	response to activity	biological_process	response to stimulus	23	1755	99	19037	2.60445e-05	0.00104453	2.52008	Bdnf;Ccl2;Ccl5;Cdk1;Cfl1;Col4a2;Cxcr4;Dbn1;Drd1;Edn1;Fn1;Igf1;Il10;Itgb1;Mmp2;Myh2;Myh4;Ncam1;Ncf2;Nos2;Plau;Slc4a1;Txn1
GO:0014824	artery smooth muscle contraction	biological_process	biological regulation|multicellular organismal process	4	1755	12	19037	0.0194817	0.134142	3.61576	Cd38;Edn1;Ednra;Htr2a
GO:0014832	urinary bladder smooth muscle contraction	biological_process	multicellular organismal process	2	1755	8	19037	0.163948	0.448809	2.71182	Htr2a;Htr7
GO:0014834	skeletal muscle satellite cell maintenance involved in skeletal muscle regeneration	biological_process	developmental process|growth|response to stimulus	2	1755	5	19037	0.070352	0.280328	4.33892	Igf1;Sepn1
GO:0014850	response to muscle activity	biological_process	response to stimulus	3	1755	28	19037	0.484033	0.73204	1.16221	Itga2;Myh4;Postn
GO:0014854	response to inactivity	biological_process	response to stimulus	1	1755	6	19037	0.440322	0.704458	1.80788	Il10
GO:0014873	response to muscle activity involved in regulation of muscle adaptation	biological_process	biological regulation|regulation of biological process|response to stimulus	1	1755	5	19037	0.38347	0.688406	2.16946	Sepn1
GO:0014883	transition between fast and slow fiber	biological_process	biological regulation|multicellular organismal process|regulation of biological process|response to stimulus	1	1755	10	19037	0.619941	0.789613	1.08473	Tnnc1
GO:0014889	muscle atrophy	biological_process	multicellular organismal process|response to stimulus	1	1755	5	19037	0.38347	0.688406	2.16946	Gatm
GO:0014894	response to denervation involved in regulation of muscle adaptation	biological_process	biological regulation|regulation of biological process|response to stimulus	1	1755	14	19037	0.741937	0.853711	0.774807	Scn5a
GO:0014898	cardiac muscle hypertrophy in response to stress	biological_process	multicellular organismal process|response to stimulus	1	1755	17	19037	0.806977	0.889729	0.638076	Gata4
GO:0014902	myotube differentiation	biological_process	cellular process|developmental process	2	1755	19	19037	0.533766	0.748901	1.14182	Cav3;Met
GO:0014904	myotube cell development	biological_process	cellular process|developmental process	1	1755	6	19037	0.440322	0.704458	1.80788	Igf1
GO:0014909	smooth muscle cell migration	biological_process	cellular process|localization|locomotion	3	1755	8	19037	0.0307483	0.178239	4.06774	Nov;Plat;Plau
GO:0014910	regulation of smooth muscle cell migration	biological_process	biological regulation|cellular process|localization|locomotion|regulation of biological process	1	1755	6	19037	0.440322	0.704458	1.80788	Plau
GO:0014911	positive regulation of smooth muscle cell migration	biological_process	biological regulation|cellular process|localization|locomotion|positive regulation of biological process|regulation of biological process	14	1755	41	19037	9.791e-06	0.000453099	3.70395	Ccl5;Cyp1b1;Egr1;F3;Has2;Igf1;Il18;Itga2;Nox4;P2ry6;Pdgfrb;Pgr;Plau;Postn
GO:0014912	negative regulation of smooth muscle cell migration	biological_process	biological regulation|cellular process|localization|locomotion|negative regulation of biological process|regulation of biological process	2	1755	15	19037	0.408624	0.704458	1.44631	Serpine1;Slit2
GO:0015012	heparan sulfate proteoglycan biosynthetic process	biological_process	cellular process|metabolic process	2	1755	13	19037	0.340143	0.688406	1.66881	Ext1;Hs6st1
GO:0015014	heparan sulfate proteoglycan biosynthetic process, polysaccharide chain biosynthetic process	biological_process	cellular process|metabolic process	1	1755	5	19037	0.38347	0.688406	2.16946	Ext1
GO:0015015	heparan sulfate proteoglycan biosynthetic process, enzymatic modification	biological_process	cellular process|metabolic process	2	1755	5	19037	0.070352	0.280328	4.33892	Hs6st1;Hs6st2
GO:0015020	glucuronosyltransferase activity	molecular_function	catalytic activity	3	1755	26	19037	0.434498	0.704458	1.25161	Csgalnact1;Ext1;Ugt2b7
GO:0015026	coreceptor activity	molecular_function	molecular transducer activity|receptor activity	4	1755	21	19037	0.122083	0.393104	2.06615	Cd80;Gpr15;Lilrb3a;Ramp3
GO:0015030	Cajal body	cellular_component	cell|cell part|membrane-enclosed lumen|organelle|organelle part	1	1755	46	19037	0.988375	1	0.235811	Anks1b
GO:0015031	protein transport	biological_process	establishment of localization|localization	17	1755	252	19037	0.935363	0.970378	0.731762	Arf2;Arf4;Cenpf;Col1a1;Copz2;Ehd3;Grip1;Kdelr3;Rab13;Ramp3;Serp2;Slc15a1;Slc15a3;Snap91;Tmed3;Tram2;Ykt6
GO:0015035	protein disulfide oxidoreductase activity	molecular_function	catalytic activity	3	1755	21	19037	0.304897	0.660045	1.54961	LOC100361898;Sh3bgrl3;Txn1
GO:0015037	peptide disulfide oxidoreductase activity	molecular_function	catalytic activity	3	1755	7	19037	0.0206121	0.134142	4.64884	P4hb;Pdia6;Txn1
GO:0015075	ion transmembrane transporter activity	molecular_function	transporter activity	3	1755	9	19037	0.043019	0.217503	3.61576	Gja1;Lasp1;Slc9b2
GO:0015078	proton transmembrane transporter activity	molecular_function	transporter activity	1	1755	19	19037	0.840956	0.910743	0.57091	Slc36a3
GO:0015093	ferrous iron transmembrane transporter activity	molecular_function	transporter activity	1	1755	6	19037	0.440322	0.704458	1.80788	Slc39a14
GO:0015106	bicarbonate transmembrane transporter activity	molecular_function	transporter activity	3	1755	14	19037	0.13238	0.394341	2.32442	Cftr;Slc26a9;Slc4a1
GO:0015108	chloride transmembrane transporter activity	molecular_function	transporter activity	2	1755	9	19037	0.198499	0.505521	2.41051	Cftr;Slc4a1
GO:0015114	phosphate ion transmembrane transporter activity	molecular_function	transporter activity	1	1755	5	19037	0.38347	0.688406	2.16946	Ankh
GO:0015116	sulfate transmembrane transporter activity	molecular_function	transporter activity	1	1755	12	19037	0.686821	0.824954	0.903941	Slc26a9
GO:0015129	lactate transmembrane transporter activity	molecular_function	transporter activity	1	1755	6	19037	0.440322	0.704458	1.80788	Slc16a3
GO:0015171	amino acid transmembrane transporter activity	molecular_function	transporter activity	4	1755	26	19037	0.214094	0.531251	1.66881	Slc36a3;Slc38a4;Slc6a20;Slc7a5
GO:0015175	neutral amino acid transmembrane transporter activity	molecular_function	transporter activity	2	1755	13	19037	0.340143	0.688406	1.66881	Slc1a4;Slc7a5
GO:0015179	L-amino acid transmembrane transporter activity	molecular_function	transporter activity	3	1755	16	19037	0.178116	0.475714	2.03387	Slc7a11;Slc7a5;Slc7a6
GO:0015180	L-alanine transmembrane transporter activity	molecular_function	transporter activity	2	1755	7	19037	0.130648	0.394341	3.09923	Slc1a4;Slc36a3
GO:0015187	glycine transmembrane transporter activity	molecular_function	transporter activity	1	1755	8	19037	0.53879	0.748901	1.35591	Slc36a3
GO:0015193	L-proline transmembrane transporter activity	molecular_function	transporter activity	3	1755	7	19037	0.0206121	0.134142	4.64884	Slc1a4;Slc36a3;Slc6a20
GO:0015194	L-serine transmembrane transporter activity	molecular_function	transporter activity	1	1755	8	19037	0.53879	0.748901	1.35591	Slc1a4
GO:0015220	choline transmembrane transporter activity	molecular_function	transporter activity	1	1755	5	19037	0.38347	0.688406	2.16946	Slc5a7
GO:0015238	drug transmembrane transporter activity	molecular_function	transporter activity	1	1755	14	19037	0.741937	0.853711	0.774807	Abcb1b
GO:0015250	water channel activity	molecular_function	transporter activity	1	1755	14	19037	0.741937	0.853711	0.774807	Aqp8
GO:0015267	channel activity	molecular_function	transporter activity	1	1755	13	19037	0.715711	0.839021	0.834407	Bcl2a1
GO:0015271	outward rectifier potassium channel activity	molecular_function	transporter activity	1	1755	13	19037	0.715711	0.839021	0.834407	Kcna3
GO:0015276	ligand-gated ion channel activity	molecular_function	molecular transducer activity|receptor activity|transporter activity	1	1755	8	19037	0.53879	0.748901	1.35591	Clca5
GO:0015278	calcium-release channel activity	molecular_function	molecular transducer activity|receptor activity|transporter activity	1	1755	13	19037	0.715711	0.839021	0.834407	Trpm2
GO:0015280	ligand-gated sodium channel activity	molecular_function	molecular transducer activity|receptor activity|transporter activity	1	1755	7	19037	0.491934	0.73204	1.54961	Scnn1a
GO:0015288	porin activity	molecular_function	transporter activity	1	1755	17	19037	0.806977	0.889729	0.638076	Aqp8
GO:0015293	symporter activity	molecular_function	transporter activity	7	1755	35	19037	0.0379202	0.206925	2.16946	Mfsd2a;Slc15a1;Slc15a3;Slc16a3;Slc17a6;Slc1a4;Slc38a4
GO:0015297	antiporter activity	molecular_function	transporter activity	2	1755	18	19037	0.5042	0.743341	1.20525	Slc7a5;Slc7a6
GO:0015301	anion:anion antiporter activity	molecular_function	transporter activity	4	1755	20	19037	0.106182	0.351304	2.16946	Slc26a9;Slc4a1;Slc4a5;Slc4a8
GO:0015333	peptide:proton symporter activity	molecular_function	transporter activity	2	1755	5	19037	0.070352	0.280328	4.33892	Slc15a1;Slc15a3
GO:0015347	sodium-independent organic anion transmembrane transporter activity	molecular_function	transporter activity	1	1755	36	19037	0.969354	0.991668	0.301314	Slco5a1
GO:0015385	sodium:proton antiporter activity	molecular_function	transporter activity	1	1755	11	19037	0.654997	0.810409	0.986118	Slc9b2
GO:0015450	P-P-bond-hydrolysis-driven protein transmembrane transporter activity	molecular_function	transporter activity	2	1755	9	19037	0.198499	0.505521	2.41051	Sec61b;Sec61g
GO:0015459	potassium channel regulator activity	molecular_function	channel regulator activity	1	1755	37	19037	0.972184	0.991684	0.29317	Kcnab2
GO:0015464	acetylcholine receptor activity	molecular_function	molecular transducer activity|receptor activity	1	1755	15	19037	0.765745	0.867375	0.723153	Chrna4
GO:0015485	cholesterol binding	molecular_function	binding	4	1755	39	19037	0.490026	0.73204	1.11254	Pmp2;Prom1;Soat1;Stard4
GO:0015616	DNA translocase activity	molecular_function	catalytic activity	2	1755	5	19037	0.070352	0.280328	4.33892	Ercc6l;Rad54b
GO:0015629	actin cytoskeleton	cellular_component	cell|cell part|organelle	25	1755	188	19037	0.0398425	0.212479	1.44246	Abcb4;Acta1;Anln;Cenpq;Cfl2;Cit;Coro1a;Dbn1;Fgr;Fscn1;Fyb;Gas2l3;Gbp2;Kntc1;Lcp1;Lima1;LOC100302465;Myoz3;Parvg;Pdlim5;Peak1;Rnd1;Stk38l;Tpm3;Tpm4
GO:0015630	microtubule cytoskeleton	cellular_component	cell|cell part|organelle	26	1755	172	19037	0.00818729	0.0722503	1.63971	Aurka;Ccnb2;Cenpe;Ckap2;Clic4;Cryab;Fes;Fmn1;Gas2l3;Hmmr;Kif18a;Kif20b;Kif2c;Knstrn;Mcm2;Nuak1;Plk1;Sept11;Sept5;Ska1;Tacc3;Tpx2;Tuba1a;Tuba1b;Tubb2b;Tubb3
GO:0015631	tubulin binding	molecular_function	binding	4	1755	53	19037	0.732348	0.853711	0.818664	Birc5;Kif14;Map1b;Stmn4
GO:0015643	toxic substance binding	molecular_function	binding	1	1755	13	19037	0.715711	0.839021	0.834407	RT1-Bb
GO:0015670	carbon dioxide transport	biological_process	establishment of localization|localization	1	1755	5	19037	0.38347	0.688406	2.16946	Car2
GO:0015671	oxygen transport	biological_process	establishment of localization|localization	3	1755	14	19037	0.13238	0.394341	2.32442	Cygb;Hbb;LOC689064
GO:0015672	monovalent inorganic cation transport	biological_process	establishment of localization|localization	1	1755	6	19037	0.440322	0.704458	1.80788	Slc9b2
GO:0015677	copper ion import	biological_process	establishment of localization|localization	2	1755	7	19037	0.130648	0.394341	3.09923	Steap1;Steap4
GO:0015693	magnesium ion transport	biological_process	establishment of localization|localization	1	1755	15	19037	0.765745	0.867375	0.723153	Kcnj2
GO:0015695	organic cation transport	biological_process	establishment of localization|localization	2	1755	14	19037	0.37477	0.688406	1.54961	Rhbg;Rhd
GO:0015696	ammonium transport	biological_process	establishment of localization|localization	2	1755	7	19037	0.130648	0.394341	3.09923	Rhbg;Rhd
GO:0015698	inorganic anion transport	biological_process	establishment of localization|localization	4	1755	30	19037	0.297609	0.660045	1.44631	Lrrc8c;Slc4a1;Slc4a5;Slc4a8
GO:0015701	bicarbonate transport	biological_process	establishment of localization|localization	5	1755	24	19037	0.0641951	0.280328	2.25985	Cftr;Slc26a9;Slc4a1;Slc4a5;Slc4a8
GO:0015705	iodide transport	biological_process	establishment of localization|localization	2	1755	5	19037	0.070352	0.280328	4.33892	Cftr;Tg
GO:0015718	monocarboxylic acid transport	biological_process	establishment of localization|localization	3	1755	15	19037	0.154716	0.444764	2.16946	Slc16a12;Slc16a14;Slc16a3
GO:0015722	canalicular bile acid transport	biological_process	establishment of localization|localization	1	1755	6	19037	0.440322	0.704458	1.80788	Aqp8
GO:0015760	glucose-6-phosphate transport	biological_process	establishment of localization|localization	1	1755	6	19037	0.440322	0.704458	1.80788	Slc37a2
GO:0015804	neutral amino acid transport	biological_process	establishment of localization|localization	1	1755	13	19037	0.715711	0.839021	0.834407	Slc7a5
GO:0015808	L-alanine transport	biological_process	establishment of localization|localization	2	1755	7	19037	0.130648	0.394341	3.09923	Slc1a4;Slc36a3
GO:0015813	L-glutamate transmembrane transport	biological_process	establishment of localization|localization	2	1755	14	19037	0.37477	0.688406	1.54961	Slc17a6;Slc7a11
GO:0015816	glycine transport	biological_process	establishment of localization|localization	2	1755	9	19037	0.198499	0.505521	2.41051	Slc36a3;Slc6a20
GO:0015824	proline transport	biological_process	establishment of localization|localization	2	1755	8	19037	0.163948	0.448809	2.71182	Slc1a4;Slc6a20
GO:0015825	L-serine transport	biological_process	establishment of localization|localization	1	1755	8	19037	0.53879	0.748901	1.35591	Slc1a4
GO:0015844	monoamine transport	biological_process	establishment of localization|localization	1	1755	8	19037	0.53879	0.748901	1.35591	Slc6a2
GO:0015867	ATP transport	biological_process	establishment of localization|localization	1	1755	11	19037	0.654997	0.810409	0.986118	Gja1
GO:0015871	choline transport	biological_process	establishment of localization|localization	1	1755	8	19037	0.53879	0.748901	1.35591	Slc5a7
GO:0015872	dopamine transport	biological_process	establishment of localization|localization	1	1755	7	19037	0.491934	0.73204	1.54961	Drd1
GO:0015884	folic acid transport	biological_process	establishment of localization|localization	1	1755	6	19037	0.440322	0.704458	1.80788	Folr2
GO:0015893	drug transport	biological_process	establishment of localization|localization|response to stimulus	1	1755	9	19037	0.581326	0.772752	1.20525	Abcb1b
GO:0015908	fatty acid transport	biological_process	establishment of localization|localization	2	1755	18	19037	0.5042	0.743341	1.20525	Mfsd2a;Pla2g4f
GO:0015914	phospholipid transport	biological_process	establishment of localization|localization	2	1755	27	19037	0.725443	0.846608	0.803503	Ldlr;Pctp
GO:0015934	large ribosomal subunit	cellular_component	cell|cell part|macromolecular complex|organelle|organelle part	1	1755	13	19037	0.715711	0.839021	0.834407	Rbm3
GO:0015991	ATP hydrolysis coupled proton transport	biological_process	establishment of localization|localization	2	1755	30	19037	0.777931	0.877748	0.723153	Atp1a3;Atp6v1e2
GO:0016004	phospholipase activator activity	molecular_function	enzyme regulator activity	2	1755	7	19037	0.130648	0.394341	3.09923	Ccl12;Ccl5
GO:0016010	dystrophin-associated glycoprotein complex	cellular_component	cell|cell part|macromolecular complex|membrane|membrane part	1	1755	13	19037	0.715711	0.839021	0.834407	Cav3
GO:0016011	dystroglycan complex	cellular_component	cell|cell part|macromolecular complex|membrane|membrane part	1	1755	5	19037	0.38347	0.688406	2.16946	Sgcg
GO:0016012	sarcoglycan complex	cellular_component	cell|cell part|macromolecular complex|membrane|membrane part	1	1755	6	19037	0.440322	0.704458	1.80788	Sgcg
GO:0016020	membrane	cellular_component	NA	154	1755	1268	19037	0.000194303	0.00474503	1.31742	Abcb4;Abcc4;Adcy2;Adcy7;Add2;Adora2a;Alox15;Anks1b;Aplnr;Aplp1;Apobr;Apol2;Apold1;Arhgap15;Atp1a3;Atp1b1;B3galnt1;B3gnt3;Bak1;Bdkrb1;Calr;Cav3;Ccdc88b;Ccnb1;Ccnb2;Ccnyl1;Cd300a;Cd38;Cfi;Cftr;Ch25h;Chrna4;Csf1r;Ctss;Cxcr2;Cysltr2;Dbn1;Drd1;Ednra;Ednrb;En1;Eno1;Entpd8;Erc2;F10;Fam72a;Fcrl2;Figf;Galnt16;Gja1;Glra1;Gpihbp1;Gria3;Grid2;Grpr;Has1;Hhipl1;Hmmr;Hmox1;Hpcal1;Htr2a;Ifi47;Il1r1;Il1rl1;Il21r;…
GO:0016021	integral component of membrane	cellular_component	membrane|membrane part	425	1755	5168	19037	0.998431	1	0.892047	Abca17;Abcb1b;Abcb4;Abcc4;Adam12;Adam19;Adam9;Adcy2;Adcy7;Adgre1;Adgre4;Adgrg5;Adgrl2;Adra1d;Adra2b;Aldh1l2;Ankh;Anln;Ano4;Ano7;Aplnr;Aplp1;Apold1;Areg;Axl;B3galnt1;B3gnt3;Bdkrb1;Bean1;Bmpr1b;Btn2a2;Btnl9;C3ar1;Cav3;Ccr1l1;Ccr3;Ccr4;Ccr5;Ccr7;Cd101;Cd164l2;Cd2;Cd200r1;Cd247;Cd300a;Cd300e;Cd300lb;Cd300le;Cd300lf;Cd33;Cd37;Cd38;Cd3e;Cd44;Cd68;Cd74;Cd80;Cd84;Cd8b;Cdh11;Cdh24;Cftr;Ch25h;Chrna4;Chst10…
GO:0016042	lipid catabolic process	biological_process	metabolic process	7	1755	84	19037	0.665855	0.81871	0.903941	Adora1;Ces2h;Lipg;Pla2g2d;Pla2g7;Plbd1;Plcb1
GO:0016045	detection of bacterium	biological_process	multi-organism process|response to stimulus	3	1755	11	19037	0.0735992	0.284534	2.95835	Naip6;Nlrc4;RT1-Db1
GO:0016048	detection of temperature stimulus	biological_process	response to stimulus	1	1755	5	19037	0.38347	0.688406	2.16946	Trpm8
GO:0016050	vesicle organization	biological_process	cellular component organization or biogenesis|cellular process	2	1755	28	19037	0.744013	0.854243	0.774807	Fbxo5;Picalm
GO:0016051	carbohydrate biosynthetic process	biological_process	metabolic process	2	1755	10	19037	0.233788	0.556728	2.16946	Chst10;Chst11
GO:0016055	Wnt signaling pathway	biological_process	biological regulation|cellular process|regulation of biological process|response to stimulus|signaling	9	1755	130	19037	0.857348	0.919613	0.750966	Ccne1;Cd44;Cpz;Kb15;Peg12;Sfrp4;Wif1;Wisp1;Wnt9b
GO:0016064	immunoglobulin mediated immune response	biological_process	immune system process|response to stimulus	3	1755	14	19037	0.13238	0.394341	2.32442	Cd74;Fcer1g;Inpp5d
GO:0016070	RNA metabolic process	biological_process	cellular process|metabolic process	1	1755	10	19037	0.619941	0.789613	1.08473	LOC103690006
GO:0016075	rRNA catabolic process	biological_process	cellular process|metabolic process	2	1755	13	19037	0.340143	0.688406	1.66881	Ern2;Slfn14
GO:0016079	synaptic vesicle exocytosis	biological_process	biological regulation|cellular process|establishment of localization|localization|signaling	2	1755	40	19037	0.894532	0.941683	0.542365	Syt10;Syt13
GO:0016101	diterpenoid metabolic process	biological_process	cellular process|metabolic process	1	1755	8	19037	0.53879	0.748901	1.35591	Pgr
GO:0016125	sterol metabolic process	biological_process	metabolic process	1	1755	10	19037	0.619941	0.789613	1.08473	Cyp51
GO:0016126	sterol biosynthetic process	biological_process	metabolic process	3	1755	17	19037	0.202394	0.507839	1.91423	Ch25h;Cyp51;Sqle
GO:0016151	nickel cation binding	molecular_function	binding	1	1755	6	19037	0.440322	0.704458	1.80788	Gstm1
GO:0016174	NAD(P)H oxidase activity	molecular_function	catalytic activity	4	1755	8	19037	0.0037183	0.0431585	5.42365	Cybb;Kmo;Nox4;Txnrd1
GO:0016175	superoxide-generating NADPH oxidase activity	molecular_function	catalytic activity	4	1755	8	19037	0.0037183	0.0431585	5.42365	Cybb;Ncf1;Ncf2;Nox4
GO:0016176	superoxide-generating NADPH oxidase activator activity	molecular_function	enzyme regulator activity	5	1755	8	19037	0.000292226	0.0066431	6.77956	Ncf1;Ncf2;Ncf4;Noxa1;Sh3pxd2b
GO:0016185	synaptic vesicle budding from presynaptic endocytic zone membrane	biological_process	cellular component organization or biogenesis|cellular process|establishment of localization|localization	1	1755	6	19037	0.440322	0.704458	1.80788	Snap91
GO:0016188	synaptic vesicle maturation	biological_process	cellular component organization or biogenesis|cellular process|developmental process	1	1755	9	19037	0.581326	0.772752	1.20525	Picalm
GO:0016192	vesicle-mediated transport	biological_process	establishment of localization|localization	5	1755	142	19037	0.997534	1	0.381947	Arf2;Ncf4;Picalm;Rab32;Syt13
GO:0016197	endosomal transport	biological_process	establishment of localization|localization	3	1755	44	19037	0.784393	0.877748	0.739588	Picalm;Rab13;Was
GO:0016199	axon midline choice point recognition	biological_process	cellular component organization or biogenesis|cellular process|developmental process|locomotion|multicellular organismal process|response to stimulus	1	1755	5	19037	0.38347	0.688406	2.16946	Robo2
GO:0016208	AMP binding	molecular_function	binding	1	1755	14	19037	0.741937	0.853711	0.774807	Hist1h1d
GO:0016209	antioxidant activity	molecular_function	NA	2	1755	18	19037	0.5042	0.743341	1.20525	S100a8;S100a9
GO:0016235	aggresome	cellular_component	cell|cell part	5	1755	41	19037	0.325874	0.688406	1.32284	Edem1;Fgr;Sfmbt2;Trim66;Ubd
GO:0016236	macroautophagy	biological_process	cellular process|metabolic process	2	1755	32	19037	0.807845	0.889729	0.677956	Tp53inp2;Vmp1
GO:0016239	positive regulation of macroautophagy	biological_process	biological regulation|cellular process|metabolic process|positive regulation of biological process|regulation of biological process	1	1755	27	19037	0.926707	0.964236	0.401752	Hmox1
GO:0016242	negative regulation of macroautophagy	biological_process	biological regulation|cellular process|metabolic process|negative regulation of biological process|regulation of biological process	1	1755	12	19037	0.686821	0.824954	0.903941	Hmox1
GO:0016264	gap junction assembly	biological_process	cellular component organization or biogenesis|cellular process	3	1755	7	19037	0.0206121	0.134142	4.64884	Gja1;Gja5;Gjb2
GO:0016266	O-glycan processing	biological_process	cellular process|metabolic process	1	1755	22	19037	0.88105	0.932065	0.493059	Galnt16
GO:0016279	protein-lysine N-methyltransferase activity	molecular_function	catalytic activity	1	1755	20	19037	0.855633	0.919372	0.542365	Mettl21b
GO:0016301	kinase activity	molecular_function	catalytic activity	17	1755	120	19037	0.0489036	0.239802	1.5367	Ccnb1;Ccne1;Cdc7;Cdk1;Cit;Ckmt1b;Cks2;Lyn;Mastl;Pdgfrb;Pik3cg;Pkib;Pkmyt1;Plau;Ptk7;Sgms2;Trib3
GO:0016303	1-phosphatidylinositol-3-kinase activity	molecular_function	catalytic activity	1	1755	11	19037	0.654997	0.810409	0.986118	Pik3cg
GO:0016310	phosphorylation	biological_process	cellular process|metabolic process	14	1755	134	19037	0.3524	0.688406	1.1333	Aldh18a1;Ckmt1b;Ckmt2;Cks2;Ephb2;Fam20c;Papss2;Pgk1;Pik3cg;Pkib;Plau;Sgms2;Sphk1;Tk1
GO:0016311	dephosphorylation	biological_process	cellular process|metabolic process	4	1755	89	19037	0.969345	0.991668	0.487519	Dusp4;Nt5dc2;Nt5dc3;Ptprc
GO:0016321	female meiosis chromosome segregation	biological_process	cellular component organization or biogenesis|cellular process|multicellular organismal process|multi-organism process|reproduction|reproductive process	2	1755	5	19037	0.070352	0.280328	4.33892	Plk1;Ttk
GO:0016322	neuron remodeling	biological_process	cellular process|developmental process|multicellular organismal process	1	1755	13	19037	0.715711	0.839021	0.834407	Rnd1
GO:0016323	basolateral plasma membrane	cellular_component	cell|cell part|membrane|membrane part	27	1755	221	19037	0.079915	0.302548	1.32523	Abcc4;Adam9;Adora1;Anxa1;Anxa2;Atp1b1;C5ar1;Car2;Cd38;Cd44;Cftr;Cxadr;Gpihbp1;Kcnj16;Ldlr;Msn;P2ry6;Rasgrf1;Rhbg;S100g;Slc13a5;Slc2a1;Slc4a1;Slc4a5;Slc9b2;Tfrc;Tlr9
GO:0016324	apical plasma membrane	cellular_component	cell|cell part|membrane|membrane part	44	1755	330	19037	0.00822297	0.0724356	1.44631	Abcb1b;Abcb4;Anxa1;Aspm;Atp1b1;Birc5;Cd44;Cd55;Cftr;Crb2;Dpp4;F2rl2;Fas;Fn1;Gja1;Gpihbp1;Havcr1;Igfbp2;Il18;Kcne4;Msn;Muc1;Muc4;Myo7a;Nox4;Nrg1;Osmr;P2ry6;Pdgfrb;Prkg2;Prom1;Ptpro;S100g;Scnn1a;Slc26a9;Slc2a1;Slc2a5;Slc5a7;Slc6a20;Slc7a5;Thy1;Tlr9;Tmem235;Trpm6
GO:0016327	apicolateral plasma membrane	cellular_component	cell|cell part|membrane|membrane part	2	1755	21	19037	0.589171	0.779191	1.03308	Cxadr;Rasgrf1
GO:0016328	lateral plasma membrane	cellular_component	cell|cell part|membrane|membrane part	10	1755	58	19037	0.0379139	0.206925	1.87022	Actn1;Anxa1;Cldn15;Gja1;Gjb1;Gjb2;Iqgap3;Ptpro;Rab13;Scn5a
GO:0016331	morphogenesis of embryonic epithelium	biological_process	developmental process|multicellular organismal process	2	1755	13	19037	0.340143	0.688406	1.66881	Aldh1a2;Vegfc
GO:0016338	calcium-independent cell-cell adhesion via plasma membrane cell-adhesion molecules	biological_process	biological adhesion	2	1755	10	19037	0.233788	0.556728	2.16946	Cldn2;Ncam1
GO:0016339	calcium-dependent cell-cell adhesion via plasma membrane cell adhesion molecules	biological_process	biological adhesion	4	1755	30	19037	0.297609	0.660045	1.44631	Cdh11;Cdh24;Sell;Selp
GO:0016342	catenin complex	cellular_component	cell|cell part|macromolecular complex|membrane|membrane part	2	1755	28	19037	0.744013	0.854243	0.774807	Cdh11;Cdh24
GO:0016358	dendrite development	biological_process	cellular component organization or biogenesis|cellular process|developmental process|multicellular organismal process	8	1755	41	19037	0.0313818	0.180637	2.11655	Bdnf;Cd3e;Cit;Dynlt1;Grip1;Lst1;Map1b;Pak1
GO:0016363	nuclear matrix	cellular_component	cell|cell part|membrane-enclosed lumen|organelle|organelle part	10	1755	97	19037	0.40446	0.704458	1.11828	Cenpf;Cenpw;Cfl1;Clic4;Dntt;Lmnb1;Mat1a;Sparc;Uhrf1;Vim
GO:0016446	somatic hypermutation of immunoglobulin genes	biological_process	developmental process|immune system process|multicellular organismal process	2	1755	12	19037	0.304935	0.660045	1.80788	Exo1;Polq
GO:0016459	myosin complex	cellular_component	cell|cell part|macromolecular complex|organelle|organelle part	8	1755	43	19037	0.0404976	0.215274	2.0181	Myh10;Myh3;Myl1;Myl4;Myo10;Myo1f;Myo1g;Myo7a
GO:0016460	myosin II complex	cellular_component	cell|cell part|macromolecular complex|organelle|organelle part	2	1755	8	19037	0.163948	0.448809	2.71182	Myh10;Myl12a
GO:0016462	pyrophosphatase activity	molecular_function	catalytic activity	1	1755	5	19037	0.38347	0.688406	2.16946	Dctpp1
GO:0016477	cell migration	biological_process	cellular process|localization|locomotion	55	1755	238	19037	1.14169e-10	2.73279e-08	2.50673	Adam9;Adamts12;Arf4;Bdkrb1;Cass4;Cd44;Col5a1;Coro1a;Ctgf;Cthrc1;Cxcr4;Depdc1b;Emilin1;Eng;Erg;Fam83d;Fes;Fgr;Fmnl3;Fscn1;Grap;Hbegf;Hck;Itga4;Itgav;Itgb1;Jak3;Lamb1;Lamc1;Lck;Lcp1;Lyn;Mmp2;Nckap1l;Nedd9;Nrg1;Pak1;Pdgfrb;Peak1;Pik3cg;Pstpip2;Ptk7;PVR;Rac2;Rnd1;Rnd3;Sirpa;Sla;Snai1;Strip2;Syk;Tgfb1;Tgfb2;Thbs1;Trem1
GO:0016485	protein processing	biological_process	metabolic process	11	1755	87	19037	0.175887	0.475425	1.3715	Adamts3;Cma1;Cpz;Ctss;F3;Pcsk1;Pcsk5;Pcsk6;Pcsk9;Pthlh;Srgn
GO:0016486	peptide hormone processing	biological_process	biological regulation|cellular process|metabolic process	4	1755	10	19037	0.00959641	0.0801	4.33892	Pcsk1;Pcsk5;Pcsk6;Scg5
GO:0016491	oxidoreductase activity	molecular_function	catalytic activity	8	1755	137	19037	0.943936	0.976602	0.633419	Akr1b8;Ch25h;Cyp1b1;Cyp51;Fads3;Nos2;Nqo1;Rdh12
GO:0016493	C-C chemokine receptor activity	molecular_function	molecular transducer activity|receptor activity	6	1755	13	19037	0.000590432	0.0110745	5.00644	Ccr1l1;Ccr3;Ccr4;Ccr5;Ccr7;Cxcr4
GO:0016494	C-X-C chemokine receptor activity	molecular_function	molecular transducer activity|receptor activity	2	1755	7	19037	0.130648	0.394341	3.09923	Cxcr2;Cxcr4
GO:0016504	peptidase activator activity	molecular_function	enzyme regulator activity	2	1755	10	19037	0.233788	0.556728	2.16946	Fn1;Pcolce
GO:0016525	negative regulation of angiogenesis	biological_process	biological regulation|developmental process|multicellular organismal process|negative regulation of biological process|regulation of biological process	15	1755	80	19037	0.00592187	0.0620225	2.03387	Angpt4;Ccl2;Col4a2;Cx3cr1;Cxcl10;Il17f;Lif;Pgk1;Rgcc;Sparc;Sulf1;Tgfb2;Thbs1;Thbs2;Thbs4
GO:0016528	sarcoplasm	cellular_component	cell|cell part	1	1755	11	19037	0.654997	0.810409	0.986118	Flnc
GO:0016529	sarcoplasmic reticulum	cellular_component	cell|cell part|organelle	3	1755	47	19037	0.820786	0.899354	0.69238	Calr;Thbs1;Thbs4
GO:0016538	cyclin-dependent protein serine/threonine kinase regulator activity	molecular_function	enzyme regulator activity	2	1755	15	19037	0.408624	0.704458	1.44631	Ccne1;Ccnyl1
GO:0016540	protein autoprocessing	biological_process	metabolic process	3	1755	15	19037	0.154716	0.444764	2.16946	Casp12;Pcsk1;Pcsk9
GO:0016554	cytidine to uridine editing	biological_process	cellular process|metabolic process	2	1755	6	19037	0.0992091	0.333151	3.61576	Apobec1;Apobec3b
GO:0016556	mRNA modification	biological_process	cellular process|metabolic process	1	1755	5	19037	0.38347	0.688406	2.16946	Apobec1
GO:0016567	protein ubiquitination	biological_process	cellular process|metabolic process	23	1755	412	19037	0.997719	1	0.605553	Bard1;Birc5;Brca1;Ccnf;Cdc20;Cdca3;Klhl13;Klhl31;Klhl41;March1;Naip6;Neurl3;Nlrc4;Plk1;Socs3;Spsb1;Traip;Trim30c;Trim59;Ubd;Ube2c;Ube2l6;Uhrf1
GO:0016572	histone phosphorylation	biological_process	cellular component organization or biogenesis|cellular process|metabolic process	2	1755	11	19037	0.269385	0.609577	1.97224	Ccna2;Cdk1
GO:0016574	histone ubiquitination	biological_process	cellular component organization or biogenesis|cellular process|metabolic process	1	1755	13	19037	0.715711	0.839021	0.834407	Uhrf1
GO:0016575	histone deacetylation	biological_process	cellular component organization or biogenesis|cellular process|metabolic process	1	1755	35	19037	0.966235	0.990532	0.309923	Brms1
GO:0016576	histone dephosphorylation	biological_process	cellular component organization or biogenesis|cellular process|metabolic process	1	1755	6	19037	0.440322	0.704458	1.80788	Eya2
GO:0016579	protein deubiquitination	biological_process	cellular process|metabolic process	2	1755	70	19037	0.990784	1	0.309923	Usp18;Zc3h12a
GO:0016584	nucleosome positioning	biological_process	cellular component organization or biogenesis|cellular process	2	1755	8	19037	0.163948	0.448809	2.71182	Hist1h1d;LOC684828
GO:0016592	mediator complex	cellular_component	cell|cell part|macromolecular complex|membrane-enclosed lumen|organelle|organelle part	1	1755	37	19037	0.972184	0.991684	0.29317	LOC100911917
GO:0016594	glycine binding	molecular_function	binding	1	1755	15	19037	0.765745	0.867375	0.723153	Glra1
GO:0016597	amino acid binding	molecular_function	binding	4	1755	33	19037	0.362516	0.688406	1.31482	Hdc;Ido1;Mat1a;Nos2
GO:0016601	Rac protein signal transduction	biological_process	biological regulation|cellular process|regulation of biological process|response to stimulus|signaling	2	1755	21	19037	0.589171	0.779191	1.03308	Aif1;Rac2
GO:0016604	nuclear body	cellular_component	cell|cell part|membrane-enclosed lumen|organelle|organelle part	24	1755	281	19037	0.683911	0.824954	0.926459	Bhlhe40;Cdt1;Cenpi;Cenpt;Dbf4;Dsn1;Exo1;Fancd2;Fas;Foxc2;Gata4;Incenp;Ivl;Kif18b;Mki67;Nhs;Plagl1;Pole2;Rad18;Rgs14;Sgo2;Sh3bgrl3;Tkt;Tonsl
GO:0016605	PML body	cellular_component	cell|cell part|membrane-enclosed lumen|organelle|organelle part	7	1755	86	19037	0.689964	0.827721	0.882919	Ciita;Nfe2;Rad51;Rgs14;Skil;Spn;Tp53inp2
GO:0016607	nuclear speck	cellular_component	cell|cell part|membrane-enclosed lumen|organelle|organelle part	25	1755	335	19037	0.890778	0.93985	0.8095	Adamts4;Bard1;Basp1;Bdnf;Cdc25c;Ckap4;Cygb;E2f7;Fndc1;H2afx;Kif22;LOC103690006;Ncapg2;Nek6;Nfkbiz;Nsl1;Nuak2;Plcb1;Rbm11;Rmi2;Sfmbt2;Smc4;Tkt;Wt1;Zcchc12
GO:0016614	oxidoreductase activity, acting on CH-OH group of donors	molecular_function	catalytic activity	1	1755	10	19037	0.619941	0.789613	1.08473	Aox2
GO:0016667	oxidoreductase activity, acting on a sulfur group of donors	molecular_function	catalytic activity	3	1755	5	19037	0.00678245	0.0621893	6.50838	Ifi30;Srxn1;Txnrd1
GO:0016671	oxidoreductase activity, acting on a sulfur group of donors, disulfide as acceptor	molecular_function	catalytic activity	1	1755	7	19037	0.491934	0.73204	1.54961	Txn1
GO:0016702	oxidoreductase activity, acting on single donors with incorporation of molecular oxygen, incorporation of two atoms of oxygen	molecular_function	catalytic activity	2	1755	11	19037	0.269385	0.609577	1.97224	P4ha3;Ptgs2
GO:0016705	oxidoreductase activity, acting on paired donors, with incorporation or reduction of molecular oxygen	molecular_function	catalytic activity	5	1755	35	19037	0.216971	0.535694	1.54961	Cyp11b2;Cyp1b1;Cyp27b1;P3h1;Ptgis
GO:0016709	oxidoreductase activity, acting on paired donors, with incorporation or reduction of molecular oxygen, NAD(P)H as one donor, and incorporation of one atom of oxygen	molecular_function	catalytic activity	2	1755	15	19037	0.408624	0.704458	1.44631	Cyp11b2;Nos2
GO:0016712	oxidoreductase activity, acting on paired donors, with incorporation or reduction of molecular oxygen, reduced flavin or flavoprotein as one donor, and incorporation of one atom of oxygen	molecular_function	catalytic activity	3	1755	48	19037	0.831695	0.906485	0.677956	Cyp1b1;Cyp2d1;LOC100361492
GO:0016740	transferase activity	molecular_function	catalytic activity	5	1755	42	19037	0.344716	0.688406	1.29134	Bst1;Cd38;Egr2;Fdps;Oasl2
GO:0016757	transferase activity, transferring glycosyl groups	molecular_function	catalytic activity	2	1755	39	19037	0.886135	0.936841	0.556271	Chsy1;Ext1
GO:0016758	transferase activity, transferring hexosyl groups	molecular_function	catalytic activity	2	1755	28	19037	0.744013	0.854243	0.774807	B3galnt1;B3gnt3
GO:0016773	phosphotransferase activity, alcohol group as acceptor	molecular_function	catalytic activity	1	1755	11	19037	0.654997	0.810409	0.986118	Fam20c
GO:0016779	nucleotidyltransferase activity	molecular_function	catalytic activity	5	1755	22	19037	0.0462885	0.228799	2.46529	Oas1a;Oas1b;Oas1i;Oas2;Pcyt1b
GO:0016787	hydrolase activity	molecular_function	catalytic activity	8	1755	110	19037	0.805997	0.889729	0.788894	Dctd;Dhx58;Entpd5;Fignl1;Idi1;Mest;Plbd1;Trpm2
GO:0016788	hydrolase activity, acting on ester bonds	molecular_function	catalytic activity	1	1755	23	19037	0.892028	0.93985	0.471621	Pter
GO:0016791	phosphatase activity	molecular_function	catalytic activity	5	1755	59	19037	0.644341	0.810409	0.919262	Dusp4;LOC103690006;Plpp1;Plpp4;Ptpn22
GO:0016798	hydrolase activity, acting on glycosyl bonds	molecular_function	catalytic activity	2	1755	8	19037	0.163948	0.448809	2.71182	Cd38;Lyz2
GO:0016805	dipeptidase activity	molecular_function	catalytic activity	1	1755	11	19037	0.654997	0.810409	0.986118	Dpep2
GO:0016810	hydrolase activity, acting on carbon-nitrogen (but not peptide) bonds	molecular_function	catalytic activity	3	1755	11	19037	0.0735992	0.284534	2.95835	Crmp1;Dpysl3;Vnn3
GO:0016829	lyase activity	molecular_function	catalytic activity	1	1755	18	19037	0.824788	0.899354	0.602627	Chac1
GO:0016831	carboxy-lyase activity	molecular_function	catalytic activity	1	1755	9	19037	0.581326	0.772752	1.20525	Hdc
GO:0016853	isomerase activity	molecular_function	catalytic activity	3	1755	12	19037	0.0916384	0.330931	2.71182	Hmgcs1;Hsd3b6;Pdia6
GO:0016887	ATPase activity	molecular_function	catalytic activity	19	1755	190	19037	0.389956	0.69824	1.08473	Atp1b1;Cenpe;Cftr;Fignl1;Kif11;Kif14;Kif15;Kif18a;Kif18b;Kif20a;Kif20b;Kif22;Kif23;Kif2c;Kif4a;Kif5c;Kifc1;Myh1;Myh10
GO:0016903	oxidoreductase activity, acting on the aldehyde or oxo group of donors	molecular_function	catalytic activity	1	1755	5	19037	0.38347	0.688406	2.16946	Aox2
GO:0016907	G-protein coupled acetylcholine receptor activity	molecular_function	molecular transducer activity|receptor activity	1	1755	6	19037	0.440322	0.704458	1.80788	Hrh1
GO:0016918	retinal binding	molecular_function	binding	4	1755	9	19037	0.00620695	0.0621893	4.82102	Aldh1a2;Rbp1;Rbp2;Stra6
GO:0016925	protein sumoylation	biological_process	cellular process|metabolic process	1	1755	27	19037	0.926707	0.964236	0.401752	Egr2
GO:0016934	extracellularly glycine-gated chloride channel activity	molecular_function	molecular transducer activity|receptor activity|transporter activity	1	1755	5	19037	0.38347	0.688406	2.16946	Glra1
GO:0016936	galactoside binding	molecular_function	binding	3	1755	6	19037	0.0126377	0.096654	5.42365	Lgals2;Lgals4;Lgals9
GO:0016998	cell wall macromolecule catabolic process	biological_process	cellular process|metabolic process	3	1755	16	19037	0.178116	0.475714	2.03387	Lyc2;Lyz2;Spaca4
GO:0017015	regulation of transforming growth factor beta receptor signaling pathway	biological_process	biological regulation|cellular process|regulation of biological process|response to stimulus|signaling	5	1755	19	19037	0.0257095	0.162116	2.85455	Cav3;Eng;Il17f;Sox11;Tgfb1
GO:0017016	Ras GTPase binding	molecular_function	binding	2	1755	21	19037	0.589171	0.779191	1.03308	Iqgap3;Rasgrf1
GO:0017017	MAP kinase tyrosine/serine/threonine phosphatase activity	molecular_function	catalytic activity	2	1755	14	19037	0.37477	0.688406	1.54961	Dusp2;Dusp4
GO:0017022	myosin binding	molecular_function	binding	2	1755	30	19037	0.777931	0.877748	0.723153	Kirrel;Mybpc1
GO:0017046	peptide hormone binding	molecular_function	binding	3	1755	44	19037	0.784393	0.877748	0.739588	Ednrb;Inhba;Npy4r
GO:0017048	Rho GTPase binding	molecular_function	binding	5	1755	39	19037	0.288577	0.645894	1.39068	Cit;Diaph3;Ect2;Fmnl3;Iqgap3
GO:0017049	GTP-Rho binding	molecular_function	binding	4	1755	21	19037	0.122083	0.393104	2.06615	Anln;Anlnl1;Cdc42ep1;Rtkn2
GO:0017053	transcriptional repressor complex	cellular_component	macromolecular complex	1	1755	57	19037	0.996	1	0.190303	Depdc1
GO:0017070	U6 snRNA binding	molecular_function	binding	1	1755	7	19037	0.491934	0.73204	1.54961	Lsm4
GO:0017080	sodium channel regulator activity	molecular_function	channel regulator activity	4	1755	31	19037	0.319158	0.686015	1.39965	Cav3;Fxyd5;Fxyd6;Scn3b
GO:0017085	response to insecticide	biological_process	response to stimulus	2	1755	16	19037	0.441554	0.704458	1.35591	Inhbb;Map1b
GO:0017091	AU-rich element binding	molecular_function	binding	1	1755	17	19037	0.806977	0.889729	0.638076	Apobec1
GO:0017108	5'-flap endonuclease activity	molecular_function	catalytic activity	1	1755	5	19037	0.38347	0.688406	2.16946	Fen1
GO:0017110	nucleoside-diphosphatase activity	molecular_function	catalytic activity	2	1755	9	19037	0.198499	0.505521	2.41051	Entpd5;Entpd8
GO:0017111	nucleoside-triphosphatase activity	molecular_function	catalytic activity	2	1755	8	19037	0.163948	0.448809	2.71182	Entpd7;Entpd8
GO:0017112	Rab guanyl-nucleotide exchange factor activity	molecular_function	binding	1	1755	36	19037	0.969354	0.991668	0.301314	Rin3
GO:0017124	SH3 domain binding	molecular_function	binding	19	1755	110	19037	0.0054338	0.0584049	1.87362	Adam12;Adam19;Adam9;Cd3e;Dpysl3;Enah;Fmn1;Gja1;Hcls1;Inpp5d;Lyn;Ncf1;Noxa1;Picalm;Ptpn22;Ptpn6;Pttg1;Sirpa;Was
GO:0017127	cholesterol transporter activity	molecular_function	transporter activity	1	1755	20	19037	0.855633	0.919372	0.542365	Stard4
GO:0017128	phospholipid scramblase activity	molecular_function	transporter activity	2	1755	15	19037	0.408624	0.704458	1.44631	Ano4;Ano7
GO:0017134	fibroblast growth factor binding	molecular_function	binding	5	1755	25	19037	0.0744107	0.286325	2.16946	Cxcl13;Fgfbp1;Itgav;Scn5a;Thbs1
GO:0017137	Rab GTPase binding	molecular_function	binding	5	1755	135	19037	0.995963	1	0.401752	Adprhl1;Anxa2;Micall2;Picalm;Rin3
GO:0017144	drug metabolic process	biological_process	cellular process|metabolic process	1	1755	27	19037	0.926707	0.964236	0.401752	Aox2
GO:0017145	stem cell division	biological_process	cellular process	2	1755	11	19037	0.269385	0.609577	1.97224	RGD1560020_predicted;RGD1563091
GO:0017147	Wnt-protein binding	molecular_function	binding	5	1755	31	19037	0.152155	0.442299	1.74956	Cthrc1;Ptpro;Sfrp1;Sfrp4;Trabd2b
GO:0017148	negative regulation of translation	biological_process	biological regulation|cellular process|metabolic process|negative regulation of biological process|regulation of biological process	7	1755	75	19037	0.54438	0.756245	1.01241	Calr;Dhfr;Mex3b;Prg3;Samd4a;Tyms;Wt1
GO:0017154	semaphorin receptor activity	molecular_function	molecular transducer activity|receptor activity	1	1755	11	19037	0.654997	0.810409	0.986118	Plxnc1
GO:0017157	regulation of exocytosis	biological_process	biological regulation|cellular process|establishment of localization|localization|regulation of biological process	2	1755	35	19037	0.84599	0.914388	0.619845	Rab13;Sept5
GO:0017158	regulation of calcium ion-dependent exocytosis	biological_process	biological regulation|cellular process|establishment of localization|localization|regulation of biological process	3	1755	34	19037	0.618207	0.789613	0.957114	Syt10;Syt12;Syt13
GO:0017162	aryl hydrocarbon receptor binding	molecular_function	binding	1	1755	8	19037	0.53879	0.748901	1.35591	Arnt2
GO:0017166	vinculin binding	molecular_function	binding	1	1755	12	19037	0.686821	0.824954	0.903941	Actn1
GO:0017185	peptidyl-lysine hydroxylation	biological_process	cellular process|metabolic process	3	1755	7	19037	0.0206121	0.134142	4.64884	P3h4;Plod2;Plod3
GO:0018022	peptidyl-lysine methylation	biological_process	cellular process|metabolic process	1	1755	10	19037	0.619941	0.789613	1.08473	Mettl21b
GO:0018024	histone-lysine N-methyltransferase activity	molecular_function	catalytic activity	1	1755	19	19037	0.840956	0.910743	0.57091	Suv39h2
GO:0018101	protein citrullination	biological_process	cellular process|metabolic process	2	1755	5	19037	0.070352	0.280328	4.33892	Padi3;Padi4
GO:0018105	peptidyl-serine phosphorylation	biological_process	cellular process|metabolic process	11	1755	154	19037	0.850617	0.918786	0.774807	Camk2b;Cdc7;Cdk1;Clspn;Mastl;Nek6;Plk1;Stk38l;Syk;Ttbk1;Ttk
GO:0018107	peptidyl-threonine phosphorylation	biological_process	cellular process|metabolic process	5	1755	72	19037	0.80523	0.889729	0.753284	Camk2b;Cdk1;Chek1;Ttbk1;Ttk
GO:0018108	peptidyl-tyrosine phosphorylation	biological_process	cellular process|metabolic process	21	1755	114	19037	0.00159762	0.0231306	1.99819	Abi3;Axl;Btk;Csf1r;Ephb2;Fes;Fgr;Hck;Insrr;Jak3;Lck;Lyn;Melk;Met;Pdgfrb;Peak1;Ptpn6;Ret;Syk;Ttbk1;Ttk
GO:0018119	peptidyl-cysteine S-nitrosylation	biological_process	cellular process|metabolic process	3	1755	5	19037	0.00678245	0.0621893	6.50838	Nos2;S100a8;S100a9
GO:0018149	peptide cross-linking	biological_process	cellular process|metabolic process	6	1755	36	19037	0.109112	0.359791	1.80788	Anxa1;Col3a1;Fn1;Ivl;Tgm1;Thbs1
GO:0018242	protein O-linked glycosylation via serine	biological_process	cellular process|metabolic process	1	1755	19	19037	0.840956	0.910743	0.57091	Galnt16
GO:0018243	protein O-linked glycosylation via threonine	biological_process	cellular process|metabolic process	1	1755	18	19037	0.824788	0.899354	0.602627	Galnt16
GO:0018279	protein N-linked glycosylation via asparagine	biological_process	cellular process|metabolic process	1	1755	30	19037	0.94519	0.977285	0.361576	St6galnac1
GO:0018298	protein-chromophore linkage	biological_process	cellular process|metabolic process	1	1755	10	19037	0.619941	0.789613	1.08473	Opn3
GO:0018345	protein palmitoylation	biological_process	cellular process|metabolic process	1	1755	24	19037	0.901994	0.94671	0.451971	Dbi
GO:0018401	peptidyl-proline hydroxylation to 4-hydroxy-L-proline	biological_process	cellular process|metabolic process	1	1755	6	19037	0.440322	0.704458	1.80788	P4hb
GO:0018894	dibenzo-p-dioxin metabolic process	biological_process	cellular process|metabolic process	2	1755	10	19037	0.233788	0.556728	2.16946	Ccl5;Cyp1b1
GO:0018916	nitrobenzene metabolic process	biological_process	cellular process|metabolic process	1	1755	5	19037	0.38347	0.688406	2.16946	Gstm1
GO:0019003	GDP binding	molecular_function	binding	2	1755	64	19037	0.984745	0.999536	0.338978	Ran;Sept5
GO:0019005	SCF ubiquitin ligase complex	cellular_component	cell|cell part|macromolecular complex	5	1755	61	19037	0.673643	0.824954	0.889122	Ccnf;Cks1b;Cks2;Spsb1;Spsb4
GO:0019087	transformation of host cell by virus	biological_process	multi-organism process	1	1755	5	19037	0.38347	0.688406	2.16946	Mmp9
GO:0019104	DNA N-glycosylase activity	molecular_function	catalytic activity	1	1755	9	19037	0.581326	0.772752	1.20525	Neil3
GO:0019158	mannokinase activity	molecular_function	catalytic activity	1	1755	5	19037	0.38347	0.688406	2.16946	Hk3
GO:0019206	nucleoside kinase activity	molecular_function	catalytic activity	1	1755	9	19037	0.581326	0.772752	1.20525	Tk1
GO:0019215	intermediate filament binding	molecular_function	binding	2	1755	9	19037	0.198499	0.505521	2.41051	Ftcd;Nme2
GO:0019216	regulation of lipid metabolic process	biological_process	biological regulation|metabolic process|regulation of biological process	2	1755	38	19037	0.877121	0.931853	0.57091	Angptl4;Bcl11b
GO:0019221	cytokine-mediated signaling pathway	biological_process	biological regulation|cellular process|regulation of biological process|response to stimulus|signaling	33	1755	142	19037	5.0412e-07	3.55261e-05	2.52085	Bgn;Ccl2;Cd44;Csf1r;Csf2rb;Csf3r;Cx3cr1;Ereg;F3;Il17ra;Il1a;Il1b;Il1f10;Il1r1;Il1r2;Il1rl1;Il1rl2;Il20ra;Il21r;Il22ra1;Il2rb;Il2rg;Il36b;Il6;Irf5;Jak3;Lrrc15;Osmr;Podnl1;Ptprn;Rtn4rl2;Sh2b2;Socs3
GO:0019222	regulation of metabolic process	biological_process	biological regulation|metabolic process|regulation of biological process	2	1755	6	19037	0.0992091	0.333151	3.61576	Bdnf;Sh2b2
GO:0019226	transmission of nerve impulse	biological_process	cellular process|multicellular organismal process|signaling	1	1755	23	19037	0.892028	0.93985	0.471621	Drd1
GO:0019228	neuronal action potential	biological_process	biological regulation|cellular process|multicellular organismal process|signaling	5	1755	37	19037	0.252136	0.592923	1.46585	Drd1;Gpr88;P2rx4;P2rx5;Scn5a
GO:0019229	regulation of vasoconstriction	biological_process	biological regulation|multicellular organismal process|regulation of biological process	3	1755	18	19037	0.227376	0.556728	1.80788	Drd1;Edn1;Hrh1
GO:0019233	sensory perception of pain	biological_process	multicellular organismal process	14	1755	80	19037	0.0139996	0.10432	1.89828	Bdkrb1;Chrna4;Cnr2;Edn1;Ednra;Ednrb;Htr2a;Mc1r;Ndn;Ngf;P2rx4;Penk;Ptgs2;Scn3b
GO:0019239	deaminase activity	molecular_function	catalytic activity	1	1755	8	19037	0.53879	0.748901	1.35591	Rpusd2
GO:0019262	N-acetylneuraminate catabolic process	biological_process	cellular process|metabolic process	1	1755	6	19037	0.440322	0.704458	1.80788	Npl
GO:0019346	transsulfuration	biological_process	cellular process|metabolic process	1	1755	5	19037	0.38347	0.688406	2.16946	Cth
GO:0019369	arachidonic acid metabolic process	biological_process	cellular process|metabolic process	3	1755	29	19037	0.508008	0.747392	1.12213	Alox15;Cyp1b1;Cyp2d1
GO:0019370	leukotriene biosynthetic process	biological_process	cellular process|metabolic process	3	1755	10	19037	0.0573429	0.263118	3.25419	Fcer1a;Prg3;Syk
GO:0019372	lipoxygenase pathway	biological_process	cellular process|metabolic process	1	1755	9	19037	0.581326	0.772752	1.20525	Alox15
GO:0019395	fatty acid oxidation	biological_process	cellular process|metabolic process	2	1755	17	19037	0.473442	0.73204	1.27615	Alox15;Cygb
GO:0019430	removal of superoxide radicals	biological_process	cellular process|metabolic process|response to stimulus	2	1755	13	19037	0.340143	0.688406	1.66881	Nqo1;Prdx1
GO:0019433	triglyceride catabolic process	biological_process	cellular process|metabolic process	1	1755	18	19037	0.824788	0.899354	0.602627	Apoc3
GO:0019441	tryptophan catabolic process to kynurenine	biological_process	cellular process|metabolic process	2	1755	7	19037	0.130648	0.394341	3.09923	Ido1;Kmo
GO:0019511	peptidyl-proline hydroxylation	biological_process	cellular process|metabolic process	2	1755	6	19037	0.0992091	0.333151	3.61576	P3h1;P4ha3
GO:0019530	taurine metabolic process	biological_process	cellular process|metabolic process	1	1755	5	19037	0.38347	0.688406	2.16946	Phgdh
GO:0019531	oxalate transmembrane transporter activity	molecular_function	transporter activity	1	1755	11	19037	0.654997	0.810409	0.986118	Slc26a9
GO:0019532	oxalate transport	biological_process	establishment of localization|localization	1	1755	11	19037	0.654997	0.810409	0.986118	Slc26a9
GO:0019538	protein metabolic process	biological_process	metabolic process	1	1755	8	19037	0.53879	0.748901	1.35591	Bag2
GO:0019674	NAD metabolic process	biological_process	cellular process|metabolic process	2	1755	7	19037	0.130648	0.394341	3.09923	Kmo;Ldha
GO:0019706	protein-cysteine S-palmitoyltransferase activity	molecular_function	catalytic activity	1	1755	27	19037	0.926707	0.964236	0.401752	Ykt6
GO:0019722	calcium-mediated signaling	biological_process	biological regulation|cellular process|regulation of biological process|response to stimulus|signaling	10	1755	62	19037	0.056159	0.263118	1.74956	Carhsp1;Ccr5;Cxcr4;Drd1;Edn1;Ednrb;Lat2;P2rx4;Sphk1;Vsnl1
GO:0019731	antibacterial humoral response	biological_process	immune system process|multi-organism process|response to stimulus	7	1755	26	19037	0.00766041	0.0682109	2.92043	Camp;Defb1;Hist1h2bd;Hist1h2bh;Hist1h2bk;Rnase6;Slpi
GO:0019787	ubiquitin-like protein transferase activity	molecular_function	catalytic activity	1	1755	7	19037	0.491934	0.73204	1.54961	Ube2l6
GO:0019800	peptide cross-linking via chondroitin 4-sulfate glycosaminoglycan	biological_process	cellular process|metabolic process	2	1755	8	19037	0.163948	0.448809	2.71182	Bgn;Ndnf
GO:0019815	B cell receptor complex	cellular_component	cell|cell part|macromolecular complex|membrane|membrane part	1	1755	5	19037	0.38347	0.688406	2.16946	Syk
GO:0019825	oxygen binding	molecular_function	binding	4	1755	24	19037	0.17512	0.473872	1.80788	Cygb;Hbb;Ido1;LOC689064
GO:0019827	stem cell population maintenance	biological_process	developmental process|multicellular organismal process	4	1755	64	19037	0.853018	0.919372	0.677956	Eomes;Lif;Padi4;Phf19
GO:0019835	cytolysis	biological_process	cellular process	4	1755	18	19037	0.0774875	0.295399	2.41051	Bak1;Gsdmd;Lyc2;Lyz2
GO:0019838	growth factor binding	molecular_function	binding	7	1755	37	19037	0.0495083	0.241807	2.05219	Axl;Csf1r;Fgfbp1;Ltbp2;Osmr;Pdgfrb;Reg3b
GO:0019841	retinol binding	molecular_function	binding	5	1755	10	19037	0.00112276	0.0173448	5.42365	Adh7;Lrat;Rbp1;Rbp2;Stra6
GO:0019855	calcium channel inhibitor activity	molecular_function	channel regulator activity	1	1755	12	19037	0.686821	0.824954	0.903941	Mcub
GO:0019864	IgG binding	molecular_function	binding	2	1755	7	19037	0.130648	0.394341	3.09923	Fcer1g;Fcgr1a
GO:0019869	chloride channel inhibitor activity	molecular_function	channel regulator activity	1	1755	9	19037	0.581326	0.772752	1.20525	Cftr
GO:0019870	potassium channel inhibitor activity	molecular_function	channel regulator activity	2	1755	7	19037	0.130648	0.394341	3.09923	Alox15;Cav3
GO:0019871	sodium channel inhibitor activity	molecular_function	channel regulator activity	1	1755	5	19037	0.38347	0.688406	2.16946	Pcsk9
GO:0019882	antigen processing and presentation	biological_process	immune system process	6	1755	30	19037	0.0528633	0.254377	2.16946	Cd74;Ctss;Rab32;RT1-Bb;RT1-DMb;Unc93b1
GO:0019886	antigen processing and presentation of exogenous peptide antigen via MHC class II	biological_process	immune system process	7	1755	14	19037	0.00010714	0.00312735	5.42365	Cd74;Fcer1g;Ifi30;RT1-Bb;RT1-Db1;RT1-DMb;Unc93b1
GO:0019887	protein kinase regulator activity	molecular_function	enzyme regulator activity	2	1755	16	19037	0.441554	0.704458	1.35591	Ptprc;Rac2
GO:0019894	kinesin binding	molecular_function	binding	5	1755	50	19037	0.494183	0.734942	1.08473	Fam83d;Kif18b;Lrp8;Nek6;Prc1
GO:0019897	extrinsic component of plasma membrane	cellular_component	cell|cell part|membrane|membrane part	4	1755	31	19037	0.319158	0.686015	1.39965	Anxa2;Eno1;Hist1h2ba;Mfge8
GO:0019898	extrinsic component of membrane	cellular_component	membrane|membrane part	5	1755	71	19037	0.795302	0.884207	0.763894	Anxa1;Bst1;Defb1;Muc16;Ncf1
GO:0019899	enzyme binding	molecular_function	binding	44	1755	411	19037	0.166224	0.454537	1.16127	Adora2a;Birc5;Brca1;Calu;Cav3;Cd40;Cdc20;Cftr;Cotl1;Crb2;Eno1;Fn1;Gstm1;H2afx;Hist1h2ah;Hk3;Hmga2;Hmox1;Lamb1;Lgals9;LOC100359692;Lyn;Mcm10;Mcm2;Msn;Nlrp1a;Nme2;Noxa1;P4hb;Pdgfrb;Pgr;Plaur;Plcb1;Ptgs2;Scn5a;Serpinb3a;Slc4a1;Slpi;Stc2;Tgfb1;Thy1;Top2a;Trib3;Txn1
GO:0019900	kinase binding	molecular_function	binding	12	1755	108	19037	0.291954	0.65286	1.20525	Aurkb;Cdc6;Fas;Itgb1;Klrk1;Ldha;Mycn;Ptpn22;Sgo1;Slc2a1;Snai1;Vim
GO:0019901	protein kinase binding	molecular_function	binding	66	1755	501	19037	0.00196075	0.0270142	1.42898	Add2;Aspm;Atp1b1;Aurka;Bora;Camk2b;Camk2n2;Ccna2;Ccnb1;Ccne1;Ccnyl1;Ccr5;Cd2;Cd44;Cdc25c;Cdkn2b;Cenpe;Cks1b;Cks2;Dbf4;E2f1;Fam83d;Fam83e;Fbxo5;Fgr;Foxm1;Gata4;Gstm1;Gstp1;Hcls1;Itgb1;Itgb2;Kif11;Kif14;Kif20a;Lax1;Lck;Map2k3;Msn;Nek6;Nos2;Nr4a3;Pak1;Pdgfrb;Plk1;Prc1;Ptpn6;Ptprc;Rac2;Racgap1;Rasgrf1;Rgcc;Rgs14;Rnd1;Rnd3;Scn5a;Snap91;Stap1;Syk;Thy1;Tnip3;Tp73;Tpx2;Trib3;Vim;Was
GO:0019902	phosphatase binding	molecular_function	binding	4	1755	54	19037	0.745793	0.85558	0.803503	Cd300a;Ncam1;Reg1a;Syk
GO:0019903	protein phosphatase binding	molecular_function	binding	9	1755	94	19037	0.504148	0.743341	1.03857	Cfl1;Csf1r;Drd1;Jak3;Lck;Met;Nek2;Reg1a;Vcan
GO:0019904	protein domain specific binding	molecular_function	binding	30	1755	341	19037	0.634567	0.806783	0.954307	Actn1;Actn2;Akap2;Apobec1;Basp1;Bhlhe40;Ccna2;Cd40;Chek1;Gja1;Hist1h2ao;Hist2h4;Hmgb2;Ikzf1;Il1b;Itgb1;Mlf1;Myo7a;Nlrp1a;Plaur;Pou2f2;Ran;Scn5a;Skil;Spn;Syk;Tacc3;Tuba1a;Tubb5;Vim
GO:0019905	syntaxin binding	molecular_function	binding	5	1755	86	19037	0.907628	0.952015	0.630657	Sept5;Syt10;Syt12;Syt13;Txlnb
GO:0019911	structural constituent of myelin sheath	molecular_function	structural molecule activity	1	1755	10	19037	0.619941	0.789613	1.08473	Mall
GO:0019915	lipid storage	biological_process	biological regulation|localization	1	1755	25	19037	0.911041	0.953365	0.433892	Ffar2
GO:0019933	cAMP-mediated signaling	biological_process	biological regulation|cellular process|regulation of biological process|response to stimulus|signaling	2	1755	33	19037	0.821412	0.899354	0.657412	Adcy2;Defb1
GO:0019934	cGMP-mediated signaling	biological_process	biological regulation|cellular process|regulation of biological process|response to stimulus|signaling	2	1755	11	19037	0.269385	0.609577	1.97224	Ednrb;Nos2
GO:0019941	modification-dependent protein catabolic process	biological_process	cellular process|metabolic process	2	1755	11	19037	0.269385	0.609577	1.97224	Ubd;Ube2l6
GO:0019953	sexual reproduction	biological_process	multi-organism process|reproduction|reproductive process	1	1755	13	19037	0.715711	0.839021	0.834407	Vgf
GO:0019955	cytokine binding	molecular_function	binding	8	1755	21	19037	0.000348682	0.00699206	4.1323	Cd44;Cd74;Crlf1;Csf1r;Cxcr4;Il17f;Osmr;Tnfrsf9
GO:0019957	C-C chemokine binding	molecular_function	binding	3	1755	8	19037	0.0307483	0.178239	4.06774	Ccr3;Ccr5;Cxcr4
GO:0019960	C-X3-C chemokine binding	molecular_function	binding	4	1755	5	19037	0.00033353	0.00697162	8.67783	Cx3cr1;Itga4;Itgav;Itgb1
GO:0019966	interleukin-1 binding	molecular_function	binding	2	1755	7	19037	0.130648	0.394341	3.09923	Il1r1;Il1r2
GO:0019985	translesion synthesis	biological_process	cellular process|metabolic process|response to stimulus	2	1755	12	19037	0.304935	0.660045	1.80788	Dtl;Ns5atp9
GO:0020005	symbiont-containing vacuole membrane	cellular_component	extracellular region|extracellular region part|organelle|organelle part	1	1755	5	19037	0.38347	0.688406	2.16946	Gbp2
GO:0020037	heme binding	molecular_function	binding	18	1755	155	19037	0.183064	0.488139	1.25969	Cybb;Cygb;Cyp11b2;Cyp1b1;Cyp27b1;Cyp2d1;Cyp51;Hbb;Hmox1;Ido1;LOC100361492;LOC689064;Nos2;Prdx1;Ptgis;Ptgs2;Pxdn;Stc2
GO:0021510	spinal cord development	biological_process	developmental process|multicellular organismal process	6	1755	55	19037	0.396859	0.704458	1.18334	Acan;Phgdh;Robo2;Slit2;Slit3;Sox11
GO:0021517	ventral spinal cord development	biological_process	developmental process|multicellular organismal process	1	1755	8	19037	0.53879	0.748901	1.35591	Lrp8
GO:0021527	spinal cord association neuron differentiation	biological_process	cellular process|developmental process|multicellular organismal process	1	1755	14	19037	0.741937	0.853711	0.774807	Mdga1
GO:0021537	telencephalon development	biological_process	developmental process|multicellular organismal process	2	1755	34	19037	0.834112	0.907916	0.638076	Fas;Scn5a
GO:0021540	corpus callosum morphogenesis	biological_process	cellular component organization or biogenesis|cellular process|developmental process|multicellular organismal process	1	1755	8	19037	0.53879	0.748901	1.35591	Tsku
GO:0021542	dentate gyrus development	biological_process	developmental process|multicellular organismal process	3	1755	19	19037	0.252891	0.592923	1.71273	Drd1;Emx2;Tmem108
GO:0021549	cerebellum development	biological_process	developmental process|multicellular organismal process	7	1755	72	19037	0.499987	0.742232	1.0546	Cd3e;Ckmt1b;En1;Gbx2;Ntm;Pak1;Scn5a
GO:0021559	trigeminal nerve development	biological_process	developmental process|multicellular organismal process	1	1755	6	19037	0.440322	0.704458	1.80788	Tifab
GO:0021591	ventricular system development	biological_process	developmental process|multicellular organismal process	1	1755	20	19037	0.855633	0.919372	0.542365	Cenpf
GO:0021612	facial nerve structural organization	biological_process	developmental process|multicellular organismal process	1	1755	10	19037	0.619941	0.789613	1.08473	Egr2
GO:0021631	optic nerve morphogenesis	biological_process	developmental process|multicellular organismal process	1	1755	5	19037	0.38347	0.688406	2.16946	Ephb2
GO:0021670	lateral ventricle development	biological_process	developmental process|multicellular organismal process	3	1755	12	19037	0.0916384	0.330931	2.71182	Dbi;Myh10;Tsku
GO:0021675	nerve development	biological_process	developmental process|multicellular organismal process	2	1755	21	19037	0.589171	0.779191	1.03308	Bdnf;Ngf
GO:0021680	cerebellar Purkinje cell layer development	biological_process	developmental process|multicellular organismal process	2	1755	14	19037	0.37477	0.688406	1.54961	Myh10;Sez6l2
GO:0021695	cerebellar cortex development	biological_process	developmental process|multicellular organismal process	1	1755	8	19037	0.53879	0.748901	1.35591	Kif14
GO:0021702	cerebellar Purkinje cell differentiation	biological_process	cellular process|developmental process|multicellular organismal process	1	1755	14	19037	0.741937	0.853711	0.774807	Top2a
GO:0021707	cerebellar granule cell differentiation	biological_process	cellular process|developmental process|multicellular organismal process	2	1755	12	19037	0.304935	0.660045	1.80788	Grid2;Top2a
GO:0021756	striatum development	biological_process	developmental process|multicellular organismal process	1	1755	17	19037	0.806977	0.889729	0.638076	Drd1
GO:0021764	amygdala development	biological_process	developmental process|multicellular organismal process	1	1755	6	19037	0.440322	0.704458	1.80788	Pak1
GO:0021766	hippocampus development	biological_process	developmental process|multicellular organismal process	10	1755	100	19037	0.442777	0.706182	1.08473	Cfl1;Drd1;Hsd3b6;Kif14;Lrp8;Mfsd2a;Nr4a3;Ran;Slc17a6;Tp73
GO:0021769	orbitofrontal cortex development	biological_process	developmental process|multicellular organismal process	1	1755	6	19037	0.440322	0.704458	1.80788	Drd1
GO:0021772	olfactory bulb development	biological_process	developmental process|multicellular organismal process	5	1755	29	19037	0.123307	0.394341	1.87022	Csf1r;Eomes;Ext1;Kif14;Slit2
GO:0021782	glial cell development	biological_process	cellular process|developmental process|multicellular organismal process	2	1755	6	19037	0.0992091	0.333151	3.61576	Phgdh;Sox11
GO:0021794	thalamus development	biological_process	developmental process|multicellular organismal process	2	1755	17	19037	0.473442	0.73204	1.27615	Gbx2;Ncam1
GO:0021795	cerebral cortex cell migration	biological_process	cellular process|developmental process|localization|locomotion|multicellular organismal process	1	1755	13	19037	0.715711	0.839021	0.834407	Cx3cr1
GO:0021796	cerebral cortex regionalization	biological_process	developmental process|multicellular organismal process	2	1755	9	19037	0.198499	0.505521	2.41051	Emx2;Eomes
GO:0021799	cerebral cortex radially oriented cell migration	biological_process	cellular process|developmental process|localization|locomotion|multicellular organismal process	1	1755	16	19037	0.787358	0.877748	0.677956	Mdga1
GO:0021819	layer formation in cerebral cortex	biological_process	cellular process|developmental process|localization|locomotion|multicellular organismal process	1	1755	14	19037	0.741937	0.853711	0.774807	Lrp8
GO:0021846	cell proliferation in forebrain	biological_process	developmental process|multicellular organismal process	4	1755	16	19037	0.0533197	0.254377	2.71182	Emx2;Hmga2;Kif14;Rrm1
GO:0021853	cerebral cortex GABAergic interneuron migration	biological_process	cellular process|developmental process|localization|locomotion|multicellular organismal process	1	1755	6	19037	0.440322	0.704458	1.80788	Drd1
GO:0021879	forebrain neuron differentiation	biological_process	cellular process|developmental process|multicellular organismal process	2	1755	12	19037	0.304935	0.660045	1.80788	Csf1r;Phlda1
GO:0021884	forebrain neuron development	biological_process	cellular process|developmental process|multicellular organismal process	1	1755	7	19037	0.491934	0.73204	1.54961	Gbx2
GO:0021891	olfactory bulb interneuron development	biological_process	cellular process|developmental process|multicellular organismal process	1	1755	5	19037	0.38347	0.688406	2.16946	Robo2
GO:0021895	cerebral cortex neuron differentiation	biological_process	cellular process|developmental process|multicellular organismal process	1	1755	15	19037	0.765745	0.867375	0.723153	Eomes
GO:0021902	commitment of neuronal cell to specific neuron type in forebrain	biological_process	cellular process|developmental process|multicellular organismal process	1	1755	7	19037	0.491934	0.73204	1.54961	Bcl11b
GO:0021915	neural tube development	biological_process	developmental process|multicellular organismal process	6	1755	49	19037	0.295648	0.660045	1.32824	Aldh1a2;Phgdh;Plod3;Sfrp1;Stil;Tgfb1
GO:0021930	cerebellar granule cell precursor proliferation	biological_process	developmental process|multicellular organismal process	1	1755	6	19037	0.440322	0.704458	1.80788	Gbx2
GO:0021940	positive regulation of cerebellar granule cell precursor proliferation	biological_process	biological regulation|cellular process|developmental process|multicellular organismal process|positive regulation of biological process|regulation of biological process	1	1755	5	19037	0.38347	0.688406	2.16946	Igf1
GO:0021943	formation of radial glial scaffolds	biological_process	cellular component organization or biogenesis|cellular process|developmental process|localization|locomotion|multicellular organismal process	1	1755	5	19037	0.38347	0.688406	2.16946	Itgb1
GO:0021952	central nervous system projection neuron axonogenesis	biological_process	cellular component organization or biogenesis|cellular process|developmental process|multicellular organismal process	2	1755	12	19037	0.304935	0.660045	1.80788	Ephb2;Slit2
GO:0021953	central nervous system neuron differentiation	biological_process	cellular process|developmental process|multicellular organismal process	2	1755	13	19037	0.340143	0.688406	1.66881	Bcl11b;Met
GO:0021957	corticospinal tract morphogenesis	biological_process	cellular component organization or biogenesis|cellular process|developmental process|multicellular organismal process	1	1755	7	19037	0.491934	0.73204	1.54961	Cdh11
GO:0021960	anterior commissure morphogenesis	biological_process	cellular component organization or biogenesis|cellular process|developmental process|multicellular organismal process	1	1755	6	19037	0.440322	0.704458	1.80788	Tsku
GO:0021983	pituitary gland development	biological_process	developmental process|multicellular organismal process	5	1755	35	19037	0.216971	0.535694	1.54961	Aldh1a2;Aldh1a3;Hmga2;Inhbb;Pcsk1
GO:0021987	cerebral cortex development	biological_process	developmental process|multicellular organismal process	12	1755	92	19037	0.138721	0.40793	1.41486	Aspm;Atp1a3;Bcl2a1;Col3a1;Emx2;H2afx;Kif14;Lrp8;Mcph1;Plcb1;Slc2a1;Tacc3
GO:0022008	neurogenesis	biological_process	cellular process|developmental process|multicellular organismal process	9	1755	70	19037	0.193484	0.505521	1.39465	Bcl11b;Chac1;Cxcr4;Lmnb1;Nrg1;Pcsk1;Pcsk9;Phgdh;Tacc3
GO:0022010	central nervous system myelination	biological_process	cellular process|developmental process|multicellular organismal process	1	1755	12	19037	0.686821	0.824954	0.903941	Myrf
GO:0022027	interkinetic nuclear migration	biological_process	developmental process|establishment of localization|localization|multicellular organismal process	1	1755	10	19037	0.619941	0.789613	1.08473	Tacc3
GO:0022029	telencephalon cell migration	biological_process	cellular process|developmental process|localization|locomotion|multicellular organismal process	2	1755	7	19037	0.130648	0.394341	3.09923	Cxcr4;Slit2
GO:0022038	corpus callosum development	biological_process	developmental process|multicellular organismal process	2	1755	11	19037	0.269385	0.609577	1.97224	Ephb2;Rtn4rl2
GO:0022405	hair cycle process	biological_process	multicellular organismal process	1	1755	6	19037	0.440322	0.704458	1.80788	Sox18
GO:0022407	regulation of cell-cell adhesion	biological_process	biological adhesion|biological regulation|regulation of biological process	2	1755	13	19037	0.340143	0.688406	1.66881	Adam8;Itgal
GO:0022408	negative regulation of cell-cell adhesion	biological_process	biological adhesion|biological regulation|cellular process|negative regulation of biological process|regulation of biological process	2	1755	19	19037	0.533766	0.748901	1.14182	Muc4;Tgfb1
GO:0022409	positive regulation of cell-cell adhesion	biological_process	biological adhesion|biological regulation|positive regulation of biological process|regulation of biological process	7	1755	24	19037	0.00474368	0.0516569	3.16379	Ccl2;Ccr5;Fstl3;Itgal;Mex3b;Myo10;Sirpa
GO:0022417	protein maturation by protein folding	biological_process	cellular process|metabolic process	1	1755	6	19037	0.440322	0.704458	1.80788	LOC100361898
GO:0022604	regulation of cell morphogenesis	biological_process	biological regulation|cellular component organization or biogenesis|cellular process|developmental process|regulation of biological process	2	1755	28	19037	0.744013	0.854243	0.774807	Cfl1;Sparc
GO:0022612	gland morphogenesis	biological_process	developmental process|multicellular organismal process	2	1755	9	19037	0.198499	0.505521	2.41051	Msn;Nkx2-3
GO:0022614	membrane to membrane docking	biological_process	cellular process	2	1755	5	19037	0.070352	0.280328	4.33892	Icam1;Msn
GO:0022617	extracellular matrix disassembly	biological_process	cellular component organization or biogenesis|cellular process	6	1755	17	19037	0.0030834	0.0376495	3.82846	Cma1;Eng;Lamc1;Lcp1;Sh3pxd2b;Tpsab1
GO:0022841	potassium ion leak channel activity	molecular_function	transporter activity	1	1755	16	19037	0.787358	0.877748	0.677956	Kcnk12
GO:0022848	acetylcholine-gated cation-selective channel activity	molecular_function	molecular transducer activity|receptor activity|transporter activity	1	1755	16	19037	0.787358	0.877748	0.677956	Chrna4
GO:0022851	GABA-gated chloride ion channel activity	molecular_function	molecular transducer activity|receptor activity|transporter activity	1	1755	12	19037	0.686821	0.824954	0.903941	Gabrb3
GO:0022857	transmembrane transporter activity	molecular_function	transporter activity	5	1755	105	19037	0.970295	0.991684	0.516538	RGD1563815;RGD1565367;Slc17a6;Sv2c;Ucp2
GO:0022890	inorganic cation transmembrane transporter activity	molecular_function	transporter activity	1	1755	5	19037	0.38347	0.688406	2.16946	LOC103693999
GO:0022900	electron transport chain	biological_process	cellular process|metabolic process	7	1755	47	19037	0.137923	0.40793	1.61555	Aox2;Cox6a2;Cybb;MGC105649;Ndufa4l2;Sh3bgrl3;Txnrd1
GO:0023014	signal transduction by protein phosphorylation	biological_process	biological regulation|cellular process|metabolic process|regulation of biological process|response to stimulus|signaling	5	1755	78	19037	0.856974	0.919535	0.695339	Bmpr1b;Map2k3;Nek6;Pak1;Tgfb2
GO:0023019	signal transduction involved in regulation of gene expression	biological_process	biological regulation|cellular process|regulation of biological process|response to stimulus|signaling	1	1755	23	19037	0.892028	0.93985	0.471621	Gata4
GO:0023026	MHC class II protein complex binding	molecular_function	binding	3	1755	5	19037	0.00678245	0.0621893	6.50838	Cd74;RT1-DMb;RT1-DOb
GO:0023052	signaling	biological_process	NA	6	1755	28	19037	0.0392095	0.209556	2.32442	Akap2;Ccr5;Ciita;Dlgap5;Nlrp1a;Nlrp3
GO:0030001	metal ion transport	biological_process	establishment of localization|localization	3	1755	17	19037	0.202394	0.507839	1.91423	Atp1b1;Slc11a1;Trpm6
GO:0030007	cellular potassium ion homeostasis	biological_process	biological regulation|cellular process	2	1755	15	19037	0.408624	0.704458	1.44631	Atp1a3;Atp1b1
GO:0030010	establishment of cell polarity	biological_process	cellular process	2	1755	35	19037	0.84599	0.914388	0.619845	Cfl1;Pak1
GO:0030011	maintenance of cell polarity	biological_process	cellular process	1	1755	6	19037	0.440322	0.704458	1.80788	Nckap1l
GO:0030016	myofibril	cellular_component	cell|cell part|organelle	5	1755	47	19037	0.439007	0.704458	1.15397	Ankrd1;Myh2;Myh3;Myh4;Myl1
GO:0030017	sarcomere	cellular_component	cell|cell part|organelle|organelle part	4	1755	38	19037	0.469365	0.73204	1.14182	Acta1;Actn1;Actn2;Mmp2
GO:0030018	Z disc	cellular_component	cell|cell part|organelle|organelle part	21	1755	129	19037	0.00722476	0.0656349	1.76584	Actn1;Actn2;Cav3;Cfl2;Cryab;Des;Fhl3;Flnc;Mybpc1;Mybpc2;Mybph;Myl12a;Myoz3;Pak1;Pdlim5;Scn3b;Scn5a;Slc2a1;Slc4a1;Sync;Xirp2
GO:0030027	lamellipodium	cellular_component	cell|cell part	24	1755	166	19037	0.0179726	0.128305	1.56828	Abi3;Acta1;Actg2;Actn1;Aif1;Cfl1;Coro1a;Dbn1;Dpp4;Dpysl3;Dynlt1;Enah;Fap;Fscn1;Itgb1;Mefv;Myh10;Myo10;Myo1g;Nme2;Pak1;Rab13;Rac2;Trpv2
GO:0030030	cell projection organization	biological_process	cellular component organization or biogenesis|cellular process	4	1755	25	19037	0.194303	0.505521	1.73557	Cfl1;Itga8;Myo7a;Plek
GO:0030031	cell projection assembly	biological_process	cellular component organization or biogenesis|cellular process	3	1755	24	19037	0.383295	0.688406	1.35591	Nckap1l;Parvg;Rac2
GO:0030032	lamellipodium assembly	biological_process	cellular component organization or biogenesis|cellular process	1	1755	34	19037	0.9628	0.988036	0.319038	Ptpro
GO:0030036	actin cytoskeleton organization	biological_process	cellular component organization or biogenesis|cellular process	18	1755	144	19037	0.113658	0.369593	1.35591	Coro1a;Diaph3;Enah;Fhl3;Fmnl3;Foxj1;Fscn1;Gas2l3;Myh10;Nuak2;Pak1;Plek2;Rac2;Ran;Sh2b2;Specc1;Tmsb10;Xirp2
GO:0030041	actin filament polymerization	biological_process	cellular component organization or biogenesis|cellular process	4	1755	24	19037	0.17512	0.473872	1.80788	Aif1;Hcls1;Micall2;Was
GO:0030042	actin filament depolymerization	biological_process	cellular component organization or biogenesis|cellular process	2	1755	12	19037	0.304935	0.660045	1.80788	Cfl1;Cfl2
GO:0030048	actin filament-based movement	biological_process	cellular process	3	1755	16	19037	0.178116	0.475714	2.03387	Myh10;Myo7a;Was
GO:0030054	cell junction	cellular_component	NA	46	1755	448	19037	0.240352	0.570301	1.11378	Amph;Anks1b;Basp1;Bin2;Ccnf;Chrna4;Clca5;Cxadr;Dsc3;Enah;Erc2;Esco2;Fblim1;Gabrb3;Gabrp;Gap43;Gja1;Gjb2;Glra1;Gria3;Grid2;Grip1;Hmcn1;Ifi30;Kcnab2;Map1b;MGC94199;Nhs;Niacr1;Olfm2;P2rx4;Ptprn;Rad51c;Rai14;Rgs14;S100a9;Samd4a;Sept11;Slc17a6;Slc5a7;Srpx2;Sv2c;Syndig1;Syt12;Tes;Tp73
GO:0030056	hemidesmosome	cellular_component	cell junction	1	1755	10	19037	0.619941	0.789613	1.08473	Itgb1
GO:0030057	desmosome	cellular_component	cell junction	2	1755	22	19037	0.614978	0.789613	0.986118	Cdsn;Dsc3
GO:0030061	mitochondrial crista	cellular_component	cell|cell part|membrane|membrane part|organelle|organelle part	2	1755	11	19037	0.269385	0.609577	1.97224	Bdnf;Lyn
GO:0030070	insulin processing	biological_process	biological regulation|cellular process|metabolic process	1	1755	6	19037	0.440322	0.704458	1.80788	Cpz
GO:0030071	regulation of mitotic metaphase/anaphase transition	biological_process	biological regulation|cellular component organization or biogenesis|cellular process|regulation of biological process	5	1755	10	19037	0.00112276	0.0173448	5.42365	Cdc6;Cenpe;Nek6;Plk1;Ube2c
GO:0030072	peptide hormone secretion	biological_process	biological regulation|cellular process|establishment of localization|localization|signaling	1	1755	5	19037	0.38347	0.688406	2.16946	Edn1
GO:0030073	insulin secretion	biological_process	biological regulation|cellular process|establishment of localization|localization|signaling	5	1755	37	19037	0.252136	0.592923	1.46585	Anxa1;Fam3b;Ildr2;Ptprn;Vgf
GO:0030097	hemopoiesis	biological_process	developmental process|immune system process|multicellular organismal process	15	1755	77	19037	0.00408596	0.0469837	2.11311	Add2;Cnn2;Csf1r;Ddias;Hbb;Ikzf1;Lyn;Pdgfrb;Pgm3;Picalm;Rtkn2;Runx3;Sfrp1;Tacc3;Tgfb2
GO:0030098	lymphocyte differentiation	biological_process	cellular process|developmental process|immune system process|multicellular organismal process	2	1755	10	19037	0.233788	0.556728	2.16946	Ikzf1;Spi1
GO:0030099	myeloid cell differentiation	biological_process	cellular process|developmental process|immune system process|multicellular organismal process	4	1755	26	19037	0.214094	0.531251	1.66881	Cebpe;Clec5a;Irf8;RGD1560020_predicted
GO:0030100	regulation of endocytosis	biological_process	biological regulation|cellular component organization or biogenesis|cellular process|establishment of localization|localization|regulation of biological process	2	1755	36	19037	0.857089	0.919535	0.602627	Picalm;Snap91
GO:0030101	natural killer cell activation	biological_process	cellular process|immune system process	8	1755	12	19037	1.81175e-06	0.000101561	7.23153	Il18;Il2rb;Itgb2;Klra5;Klrk1;LOC102547056;Ncr3;Prdx1
GO:0030104	water homeostasis	biological_process	biological regulation	1	1755	7	19037	0.491934	0.73204	1.54961	Igf1
GO:0030111	regulation of Wnt signaling pathway	biological_process	biological regulation|cellular process|regulation of biological process|response to stimulus|signaling	1	1755	19	19037	0.840956	0.910743	0.57091	Mdfi
GO:0030122	AP-2 adaptor complex	cellular_component	cell|cell part|macromolecular complex|membrane|membrane part|organelle|organelle part	2	1755	12	19037	0.304935	0.660045	1.80788	Hip1;Picalm
GO:0030126	COPI vesicle coat	cellular_component	cell|cell part|macromolecular complex|membrane|membrane part|organelle|organelle part	2	1755	15	19037	0.408624	0.704458	1.44631	Copz2;Tmed3
[truncated: 2,934 more rows]

## Sheet: up-regulated (SSCI–2 vs. sham)
id	Term	Category	GO_classify2	ListHits	ListTotal	PopHits	PopTotal	p-value	q-value	Enrichment_score	Gene
GO:0000015	phosphopyruvate hydratase complex	cellular_component	cell|cell part|macromolecular complex	1	1886	5	19037	0.406488	0.732793	2.01877	Eno1
GO:0000045	autophagosome assembly	biological_process	cellular component organization or biogenesis|cellular process|metabolic process	2	1886	55	19037	0.977431	1	0.367049	Ctsd;Irgm
GO:0000049	tRNA binding	molecular_function	binding	1	1886	54	19037	0.996454	1	0.186923	Slfn13
GO:0000050	urea cycle	biological_process	cellular process|metabolic process	2	1886	9	19037	0.221942	0.554743	2.24308	Ass1;Cebpa
GO:0000060	protein import into nucleus, translocation	biological_process	establishment of localization|localization	6	1886	30	19037	0.0704211	0.3218	2.01877	Bcl3;Ifng;Nfkbia;Pola2;Tgfb1;Tnf
GO:0000062	fatty-acyl-CoA binding	molecular_function	binding	1	1886	25	19037	0.926461	0.973791	0.403754	Dbi
GO:0000064	L-ornithine transmembrane transporter activity	molecular_function	transporter activity	2	1886	9	19037	0.221942	0.554743	2.24308	LOC292543;Slc7a1
GO:0000070	mitotic sister chromatid segregation	biological_process	cellular component organization or biogenesis|cellular process	13	1886	27	19037	4.49121e-07	2.48464e-05	4.86	Cdca8;Cit;Dsn1;Espl1;Kif18a;Kif18b;Knstrn;Mad2l1;Nek2;Nsl1;Nusap1;Plk1;Spag5
GO:0000076	DNA replication checkpoint	biological_process	biological regulation|cellular process|negative regulation of biological process|regulation of biological process	1	1886	7	19037	0.518292	0.760111	1.44198	Cdt1
GO:0000077	DNA damage checkpoint	biological_process	biological regulation|cellular process|negative regulation of biological process|regulation of biological process|response to stimulus	4	1886	29	19037	0.322577	0.710396	1.39226	Chek1;Clspn;E2f1;H2afx
GO:0000079	regulation of cyclin-dependent protein serine/threonine kinase activity	biological_process	biological regulation|cellular process|metabolic process|regulation of biological process	2	1886	15	19037	0.446038	0.739464	1.34585	Cdkn2b;Rgcc
GO:0000082	G1/S transition of mitotic cell cycle	biological_process	cellular process	10	1886	64	19037	0.0977297	0.368354	1.57716	Camk2b;Ccne1;Cdkn3;E2f1;Gpr132;Inhba;Iqgap3;Nasp;Pole;RGD1560020_predicted
GO:0000086	G2/M transition of mitotic cell cycle	biological_process	cellular process	9	1886	38	19037	0.0103715	0.0834241	2.39065	Birc5;Ccna2;Cdc25c;Cdkn2b;Chek1;Cit;Foxm1;Mastl;Plk1
GO:0000122	negative regulation of transcription by RNA polymerase II	biological_process	biological regulation|cellular process|metabolic process|negative regulation of biological process|regulation of biological process	73	1886	802	19037	0.798303	0.907892	0.918767	Arid5a;Aurkb;Bhlhe40;Brms1;Ccne1;Cebpa;Cebpb;Ciita;Dnmt3b;E2f1;E2f7;E2f8;Ednrb;Elane;En1;Eno1;Eomes;Faslg;Fgf9;Foxj1;Foxm1;Foxs1;Frk;Gfi1;Glis1;Glis3;Hcls1;Hif1a;Hist1h1b;Hist1h1d;Ifng;Ikzf1;Il1b;Irf8;Irx2;LOC684828;Loxl2;Lrp8;Mdfi;Met;Mmp12;Msc;Mxd1;Mxd3;Nfkb1;Nfkb2;Plk1;Prdm1;Rbl1;Relb;RGD1560020_predicted;Ripply1;Ripply3;Runx3;Sall1;Sema4d;Sox11;Spdef;Spi1;St18;Suv39h2;Tbx21;Tfap2a;Tgfb1;Tnf;T…
GO:0000132	establishment of mitotic spindle orientation	biological_process	cellular component organization or biogenesis|cellular process|establishment of localization|localization	3	1886	23	19037	0.402062	0.732793	1.31659	Cenpa;Ndc80;Sapcd2
GO:0000137	Golgi cis cisterna	cellular_component	cell|cell part|organelle|organelle part	1	1886	9	19037	0.609044	0.804571	1.12154	Lyz2
[truncated: 4,963 more rows]

## Sheet: up-regulated (SSCI–3 vs. sham)
id	Term	Category	GO_classify2	ListHits	ListTotal	PopHits	PopTotal	p-value	q-value	Enrichment_score	Gene
[truncated: 1,541 more rows]

[truncated: 3 more sheets: down-regulated(SSCI–1 vs. sham), down-regulated(SSCI–2 vs. sham), down-regulated(SSCI–3 vs. sham)]
