# Supplementary material for: Expression profiles of circular RNAs and interaction networks of competing endogenous RNAs in neurogenic bladder of rats following suprasacral spinal cord injury
Source: PeerJ. 2023 Sep 18;11:e16042. doi: 10.7717/peerj.16042 (PMC10512963; doi:10.7717/peerj.16042)
Supplement: Supplemental Information 15 [file peerj-11-16042-s015.xlsx]

## Sheet: up-regulated (SSCI–1 vs. sham)
id	Term	Classification_level1	Classification_level2	ListHits	ListTotal	PopHits	PopTotal	p-value	q-value	Enrichment_score	Gene	hyperlink_only_excel
rno00010	Glycolysis / Gluconeogenesis	Metabolism	Carbohydrate metabolism	6	795	64	7679	0.662534	1	0.905542	Adh7;Aldh1a3;Eno1;Hk3;Ldha;Pgk1	rno00010
rno00020	Citrate cycle (TCA cycle)	Metabolism	Carbohydrate metabolism	1	795	31	7679	0.966459	1	0.311584	Idh1	rno00020
rno00030	Pentose phosphate pathway	Metabolism	Carbohydrate metabolism	3	795	29	7679	0.590038	0.96252	0.999219	G6pd;Pgd;Tkt	rno00030
rno00040	Pentose and glucuronate interconversions	Metabolism	Carbohydrate metabolism	3	795	33	7679	0.678817	1	0.878102	Akr1b8;Ugdh;Ugt2b7	rno00040
rno00051	Fructose and mannose metabolism	Metabolism	Carbohydrate metabolism	2	795	34	7679	0.880668	1	0.568183	Akr1b8;Hk3	rno00051
rno00052	Galactose metabolism	Metabolism	Carbohydrate metabolism	3	795	30	7679	0.613643	0.989398	0.965912	Akr1b8;Gale;Hk3	rno00052
rno00053	Ascorbate and aldarate metabolism	Metabolism	Carbohydrate metabolism	2	795	26	7679	0.767007	1	0.743009	Ugdh;Ugt2b7	rno00053
rno00061	Fatty acid biosynthesis	Metabolism	Lipid metabolism	1	795	13	7679	0.758754	1	0.743009	Olah	rno00061
rno00062	Fatty acid elongation	Metabolism	Lipid metabolism	1	795	28	7679	0.953384	1	0.344969	Echs1	rno00062
rno00071	Fatty acid degradation	Metabolism	Lipid metabolism	2	795	44	7679	0.950834	1	0.439051	Adh7;Echs1	rno00071
rno00072	Synthesis and degradation of ketone bodies	Metabolism	Lipid metabolism	1	795	10	7679	0.664982	1	0.965912	Hmgcs1	rno00072
rno00100	Steroid biosynthesis	Metabolism	Lipid metabolism	4	795	19	7679	0.126277	0.365078	2.0335	Cyp27b1;Cyp51;Soat1;Sqle	rno00100
rno00120	Primary bile acid biosynthesis	Metabolism	Lipid metabolism	1	795	16	7679	0.826302	1	0.603695	Ch25h	rno00120
rno00130	Ubiquinone and other terpenoid-quinone biosynthesis	Metabolism	Metabolism of cofactors and vitamins	2	795	11	7679	0.317689	0.708132	1.7562	Hpd;Nqo1	rno00130
rno00140	Steroid hormone biosynthesis	Metabolism	Lipid metabolism	4	795	75	7679	0.959179	1	0.515153	Cyp11b2;Cyp1b1;Cyp2d1;Ugt2b7	rno00140
rno00190	Oxidative phosphorylation	Metabolism	Energy metabolism	3	795	119	7679	0.999774	1	0.243507	Atp6v1e2;Cox6a2;Ndufa4l2	rno00190
rno00220	Arginine biosynthesis	Metabolism	Amino acid metabolism	2	795	19	7679	0.599857	0.973102	1.01675	Arg1;Nos2	rno00220
rno00230	Purine metabolism	Metabolism	Nucleotide metabolism	15	795	169	7679	0.77386	1	0.857318	Adcy2;Adcy7;Enpp3;Entpd5;Entpd8;Impdh1;Nme2;Papss2;Pola2;Pole;Pole2;Polr2l;Prim1;Rrm1;Rrm2	rno00230
rno00240	Pyrimidine metabolism	Metabolism	Nucleotide metabolism	15	795	96	7679	0.067907	0.227099	1.50924	Dctd;Dctpp1;Enpp3;Entpd5;Entpd8;Nme2;Pola2;Pole;Pole2;Polr2l;Prim1;Rrm1;Rrm2;Tk1;Tyms	rno00240
rno00260	Glycine, serine and threonine metabolism	Metabolism	Amino acid metabolism	5	795	38	7679	0.357284	0.768328	1.27094	Chdh;Cth;Gatm;Phgdh;Psat1	rno00260
rno00270	Cysteine and methionine metabolism	Metabolism	Amino acid metabolism	4	795	45	7679	0.699034	1	0.858588	Bcat1;Cth;Ldha;Mat1a	rno00270
rno00280	Valine, leucine and isoleucine degradation	Metabolism	Amino acid metabolism	4	795	53	7679	0.813086	1	0.72899	Aox2;Bcat1;Echs1;Hmgcs1	rno00280
rno00310	Lysine degradation	Metabolism	Amino acid metabolism	5	795	54	7679	0.670513	1	0.894363	Colgalt1;Echs1;Plod2;Plod3;Suv39h2	rno00310
rno00330	Arginine and proline metabolism	Metabolism	Amino acid metabolism	8	795	48	7679	0.117841	0.354738	1.60985	Aldh18a1;Aoc1;Arg1;Ckmt2;Gatm;Nos2;P4ha3;Pycr1	rno00330
rno00340	Histidine metabolism	Metabolism	Amino acid metabolism	4	795	23	7679	0.209641	0.527716	1.67985	Aldh1a3;Aoc1;Ftcd;Hdc	rno00340
rno00350	Tyrosine metabolism	Metabolism	Amino acid metabolism	4	795	38	7679	0.564164	0.946757	1.01675	Adh7;Aldh1a3;Aox2;Hpd	rno00350
rno00360	Phenylalanine metabolism	Metabolism	Amino acid metabolism	2	795	20	7679	0.628373	0.9972	0.965912	Aldh1a3;Hpd	rno00360
rno00380	Tryptophan metabolism	Metabolism	Amino acid metabolism	7	795	45	7679	0.17901	0.47091	1.50253	Aoc1;Aox2;Cyp1b1;Echs1;Ido1;Kmo;Tph1	rno00380
rno00410	beta-Alanine metabolism	Metabolism	Metabolism of other amino acids	2	795	30	7679	0.832336	1	0.643941	Aldh1a3;Echs1	rno00410
rno00430	Taurine and hypotaurine metabolism	Metabolism	Metabolism of other amino acids	1	795	11	7679	0.699712	1	0.878102	Ggt1	rno00430
rno00440	Phosphonate and phosphinate metabolism	Metabolism	Metabolism of other amino acids	1	795	5	7679	0.421084	0.842168	1.93182	Pcyt1b	rno00440
rno00450	Selenocompound metabolism	Metabolism	Metabolism of other amino acids	3	795	17	7679	0.254689	0.599751	1.70455	Cth;Papss2;Txnrd1	rno00450
rno00480	Glutathione metabolism	Metabolism	Metabolism of other amino acids	13	795	58	7679	0.00543904	0.0285784	2.16498	G6pd;Ggt1;Gpx2;Gpx7;Gsta2;Gsta3;Gsta5;Gstm1;Gstp1;Idh1;Pgd;Rrm1;Rrm2	rno00480
rno00500	Starch and sucrose metabolism	Metabolism	Carbohydrate metabolism	2	795	29	7679	0.817757	1	0.666146	Enpp3;Hk3	rno00500
rno00512	Mucin type O-glycan biosynthesis	Metabolism	Glycan biosynthesis and metabolism	2	795	27	7679	0.785157	1	0.71549	Galnt16;St6galnac1	rno00512
rno00514	Other types of O-glycan biosynthesis	Metabolism	Glycan biosynthesis and metabolism	2	795	22	7679	0.680609	1	0.878102	Colgalt1;Plod3	rno00514
rno00515	Mannose type O-glycan biosyntheis	Metabolism	Glycan biosynthesis and metabolism	1	795	23	7679	0.919337	1	0.419962	Chst10	rno00515
rno00520	Amino sugar and nucleotide sugar metabolism	Metabolism	Carbohydrate metabolism	5	795	47	7679	0.544664	0.939305	1.02757	Gale;Hk3;Npl;Pgm3;Ugdh	rno00520
rno00532	Glycosaminoglycan biosynthesis - chondroitin sulfate / dermatan sulfate	Metabolism	Glycan biosynthesis and metabolism	5	795	21	7679	0.058812	0.204442	2.29979	Chpf2;Chst11;Chsy1;Chsy3;Csgalnact1	rno00532
rno00533	Glycosaminoglycan biosynthesis - keratan sulfate	Metabolism	Glycan biosynthesis and metabolism	1	795	14	7679	0.783772	1	0.689937	Chst4	rno00533
rno00534	Glycosaminoglycan biosynthesis - heparan sulfate / heparin	Metabolism	Glycan biosynthesis and metabolism	3	795	25	7679	0.486899	0.90183	1.15909	Ext1;Hs6st1;Hs6st2	rno00534
rno00561	Glycerolipid metabolism	Metabolism	Lipid metabolism	5	795	61	7679	0.771111	1	0.791731	Akr1b8;Lipg;Mogat1;Plpp1;Plpp4	rno00561
rno00562	Inositol phosphate metabolism	Metabolism	Carbohydrate metabolism	3	795	73	7679	0.985086	1	0.39695	Inpp5d;Pik3cg;Plcb1	rno00562
rno00564	Glycerophospholipid metabolism	Metabolism	Lipid metabolism	6	795	96	7679	0.941717	1	0.603695	Pcyt1b;Pla2g2d;Pla2g4f;Pld4;Plpp1;Plpp4	rno00564
rno00565	Ether lipid metabolism	Metabolism	Lipid metabolism	5	795	45	7679	0.504772	0.909835	1.07324	Pla2g2d;Pla2g4f;Pla2g7;Pld4;Plpp1	rno00565
rno00590	Arachidonic acid metabolism	Metabolism	Lipid metabolism	8	795	77	7679	0.551225	0.939305	1.00354	Alox15;Ggt1;Gpx2;Gpx7;Pla2g2d;Pla2g4f;Ptgis;Ptgs2	rno00590
rno00591	Linoleic acid metabolism	Metabolism	Lipid metabolism	3	795	39	7679	0.783929	1	0.743009	Alox15;Pla2g2d;Pla2g4f	rno00591
rno00592	alpha-Linolenic acid metabolism	Metabolism	Lipid metabolism	2	795	23	7679	0.704395	1	0.839923	Pla2g2d;Pla2g4f	rno00592
rno00600	Sphingolipid metabolism	Metabolism	Lipid metabolism	3	795	49	7679	0.895213	1	0.591375	Plpp1;Sgms2;Sphk1	rno00600
rno00601	Glycosphingolipid biosynthesis - lacto and neolacto series	Metabolism	Glycan biosynthesis and metabolism	3	795	29	7679	0.590038	0.96252	0.999219	B3galnt1;B3gnt3;Fut1	rno00601
rno00603	Glycosphingolipid biosynthesis - globo and isoglobo series	Metabolism	Glycan biosynthesis and metabolism	2	795	15	7679	0.469797	0.885038	1.28788	B3galnt1;Fut1	rno00603
rno00620	Pyruvate metabolism	Metabolism	Carbohydrate metabolism	1	795	39	7679	0.986067	1	0.24767	Ldha	rno00620
rno00640	Propanoate metabolism	Metabolism	Carbohydrate metabolism	2	795	31	7679	0.845855	1	0.623169	Echs1;Ldha	rno00640
rno00650	Butanoate metabolism	Metabolism	Carbohydrate metabolism	2	795	25	7679	0.747537	1	0.77273	Echs1;Hmgcs1	rno00650
rno00670	One carbon pool by folate	Metabolism	Metabolism of cofactors and vitamins	5	795	18	7679	0.0320385	0.124737	2.68309	Aldh1l2;Dhfr;Ftcd;Mthfd2;Tyms	rno00670
rno00740	Riboflavin metabolism	Metabolism	Metabolism of cofactors and vitamins	1	795	8	7679	0.583028	0.96252	1.20739	Enpp3	rno00740
rno00750	Vitamin B6 metabolism	Metabolism	Metabolism of cofactors and vitamins	2	795	10	7679	0.27758	0.638215	1.93182	Aox2;Psat1	rno00750
rno00760	Nicotinate and nicotinamide metabolism	Metabolism	Metabolism of cofactors and vitamins	6	795	32	7679	0.106815	0.324895	1.81108	Aox2;Bst1;Cd38;Enpp3;Nnmt;Qprt	rno00760
rno00770	Pantothenate and CoA biosynthesis	Metabolism	Metabolism of cofactors and vitamins	3	795	19	7679	0.313583	0.704356	1.52512	Bcat1;Enpp3;Vnn3	rno00770
rno00790	Folate biosynthesis	Metabolism	Metabolism of cofactors and vitamins	4	795	26	7679	0.279871	0.638455	1.48602	Akr1b8;Dhfr;Gch1;Tph1	rno00790
rno00830	Retinol metabolism	Metabolism	Metabolism of cofactors and vitamins	7	795	80	7679	0.735383	1	0.845173	Adh7;Aldh1a2;Aldh1a7;Aox2;Lrat;Rdh12;Ugt2b7	rno00830
rno00860	Porphyrin and chlorophyll metabolism	Metabolism	Metabolism of cofactors and vitamins	2	795	40	7679	0.929522	1	0.482956	Hmox1;Ugt2b7	rno00860
rno00900	Terpenoid backbone biosynthesis	Metabolism	Metabolism of terpenoids and polyketides	3	795	23	7679	0.430855	0.844361	1.25989	Fdps;Hmgcs1;Idi1	rno00900
rno00910	Nitrogen metabolism	Metabolism	Energy metabolism	3	795	17	7679	0.254689	0.599751	1.70455	Car1;Car13;Car2	rno00910
rno00920	Sulfur metabolism	Metabolism	Energy metabolism	1	795	12	7679	0.730845	1	0.804927	Papss2	rno00920
rno00970	Aminoacyl-tRNA biosynthesis	Genetic Information Processing	Translation	1	795	44	7679	0.991958	1	0.219525	Gars	rno00970
rno00980	Metabolism of xenobiotics by cytochrome P450	Metabolism	Xenobiotics biodegradation and metabolism	10	795	64	7679	0.120898	0.356588	1.50924	Adh7;Akr7a3;Aldh1a3;Cyp1b1;Gsta2;Gsta3;Gsta5;Gstm1;Gstp1;Ugt2b7	rno00980
rno00982	Drug metabolism - cytochrome P450	Metabolism	Xenobiotics biodegradation and metabolism	9	795	65	7679	0.226619	0.560786	1.33742	Adh7;Aldh1a3;Aox2;Gsta2;Gsta3;Gsta5;Gstm1;Gstp1;Ugt2b7	rno00982
rno00983	Drug metabolism - other enzymes	Metabolism	Xenobiotics biodegradation and metabolism	13	795	83	7679	0.0838231	0.268971	1.51287	Ces2;Ces2h;Gsta2;Gsta3;Gsta5;Gstm1;Gstp1;Impdh1;Nme2;Rrm1;Rrm2;Tk1;Ugt2b7	rno00983
rno01521	EGFR tyrosine kinase inhibitor resistance	Human Diseases	Drug resistance: antineoplastic	6	795	79	7679	0.840617	1	0.733604	Axl;Igf1;Il6;Met;Nrg1;Pdgfrb	rno01521
rno01522	Endocrine resistance	Human Diseases	Drug resistance: antineoplastic	9	795	93	7679	0.635809	1	0.934753	Adcy2;Adcy7;E2f1;E2f3;Hbegf;Igf1;Mapk10;Mmp2;Mmp9	rno01522
rno01523	Antifolate resistance	Human Diseases	Drug resistance: antineoplastic	6	795	30	7679	0.0832312	0.268971	1.93182	Abcc4;Dhfr;Folr2;Il1b;Il6;Tyms	rno01523
rno01524	Platinum drug resistance	Human Diseases	Drug resistance: antineoplastic	11	795	76	7679	0.158734	0.437267	1.39803	Bak1;Birc5;Brca1;Fas;Gsta2;Gsta3;Gsta5;Gstm1;Gstp1;Pmaip1;Top2a	rno01524
rno02010	ABC transporters	Environmental Information Processing	Membrane transport	5	795	47	7679	0.544664	0.939305	1.02757	Abca17;Abcb1b;Abcb4;Abcc4;Cftr	rno02010
rno03008	Ribosome biogenesis in eukaryotes	Genetic Information Processing	Translation	4	795	78	7679	0.967429	1	0.495339	Heatr1;Ran;Rexo2;Rpp25	rno03008
rno03013	RNA transport	Genetic Information Processing	Translation	4	795	160	7679	0.999973	1	0.241478	Pabpc1l2a;Ran;Rpp25;Tacc3	rno03013
rno03015	mRNA surveillance pathway	Genetic Information Processing	Translation	1	795	92	7679	0.99996	1	0.10499	Pabpc1l2a	rno03015
rno03018	RNA degradation	Genetic Information Processing	Folding, sorting and degradation	4	795	80	7679	0.972036	1	0.482956	Btg3;Eno1;Lsm4;Pabpc1l2a	rno03018
rno03020	RNA polymerase	Genetic Information Processing	Transcription	1	795	28	7679	0.953384	1	0.344969	Polr2l	rno03020
rno03030	DNA replication	Genetic Information Processing	Replication and repair	10	795	34	7679	0.00173152	0.0120373	2.84092	Fen1;Mcm2;Mcm3;Mcm4;Mcm5;Mcm6;Pola2;Pole;Pole2;Prim1	rno03030
rno03040	Spliceosome	Genetic Information Processing	Transcription	1	795	129	7679	0.999999	1	0.0748769	Lsm4	rno03040
rno03060	Protein export	Genetic Information Processing	Folding, sorting and degradation	2	795	26	7679	0.767007	1	0.743009	Sec61b;Sec61g	rno03060
rno03320	PPAR signaling pathway	Organismal Systems	Endocrine system	7	795	79	7679	0.723193	1	0.855871	Angptl4;Apoc3;Dbi;Fabp4;Fabp5;Olr1;RGD1565355	rno03320
rno03410	Base excision repair	Genetic Information Processing	Replication and repair	4	795	35	7679	0.497242	0.90183	1.1039	Fen1;Neil3;Pole;Pole2	rno03410
rno03420	Nucleotide excision repair	Genetic Information Processing	Replication and repair	2	795	44	7679	0.950834	1	0.439051	Pole;Pole2	rno03420
rno03430	Mismatch repair	Genetic Information Processing	Replication and repair	1	795	22	7679	0.909991	1	0.439051	Exo1	rno03430
rno03440	Homologous recombination	Genetic Information Processing	Replication and repair	8	795	39	7679	0.0432468	0.161898	1.98136	Bard1;Brca1;Brip1;Eme1;Rad51;Rad51c;Rad54b;Rad54l	rno03440
rno03450	Non-homologous end-joining	Genetic Information Processing	Replication and repair	2	795	13	7679	0.395937	0.81418	1.48602	Dntt;Fen1	rno03450
rno03460	Fanconi anemia pathway	Genetic Information Processing	Replication and repair	9	795	49	7679	0.0615163	0.211326	1.77412	Brca1;Brip1;Eme1;Fancd2;Fanci;Rad51;Rad51c;Rmi2;Ube2t	rno03460
rno04010	MAPK signaling pathway	Environmental Information Processing	Signal transduction	35	795	288	7679	0.176825	0.469391	1.17385	Angpt4;Areg;Bdnf;Cd14;Csf1r;Dusp2;Dusp4;Ereg;Fas;Fgf18;Fgf9;Flnc;Gadd45b;Gadd45g;Igf1;Il1a;Il1b;Il1r1;Map2k3;Mapk10;Met;Ngf;Nr4a1;Pak1;Pdgfrb;Pla2g4f;Ptpn7;Rac2;Rasgrf1;Rasgrp4;Rras2;Tgfb1;Tgfb2;Tgfb3;Vegfc	rno04010
rno04012	ErbB signaling pathway	Environmental Information Processing	Signal transduction	7	795	85	7679	0.79068	1	0.795457	Areg;Camk2b;Ereg;Hbegf;Mapk10;Nrg1;Pak1	rno04012
rno04014	Ras signaling pathway	Environmental Information Processing	Signal transduction	24	795	227	7679	0.489067	0.90183	1.02123	Angpt4;Bdnf;Csf1r;Fgf18;Fgf9;Gnb4;Gng13;Gng2;Gng4;Gngt2;Htr7;Igf1;Mapk10;Met;Ngf;Pak1;Pdgfrb;Pla2g2d;Pla2g4f;Rac2;Rasgrf1;Rasgrp4;Rras2;Vegfc	rno04014
rno04015	Rap1 signaling pathway	Environmental Information Processing	Signal transduction	24	795	205	7679	0.291224	0.659205	1.13082	Adcy2;Adcy7;Adora2a;Angpt4;Csf1r;F2r;Fgf18;Fgf9;Fpr1;Fyb;Igf1;Itgal;Itgam;Itgb1;Itgb2;Map2k3;Met;Ngf;Pdgfrb;Plcb1;Rac2;Rgs14;Thbs1;Vegfc	rno04015
rno04020	Calcium signaling pathway	Environmental Information Processing	Signal transduction	26	795	182	7679	0.0552523	0.194381	1.37987	Adcy2;Adcy7;Adora2a;Adra1d;Bdkrb1;Camk2b;Cd38;Cysltr2;Drd1;Ednra;Ednrb;F2r;Grpr;Hrh1;Htr2a;Htr7;Ltb4r2;Nos2;P2rx4;P2rx5;Pdgfrb;Plcb1;Ptafr;Ptgfr;Sphk1;Tnnc1	rno04020
rno04022	cGMP - PKG signaling pathway	Environmental Information Processing	Signal transduction	15	795	164	7679	0.733193	1	0.883456	Adcy2;Adcy7;Adora1;Adra1d;Adra2b;Atp1a3;Atp1b1;Creb3l4;Ednra;Ednrb;Gata4;Pik3cg;Pik3r5;Plcb1;Prkg2	rno04022
rno04024	cAMP signaling pathway	Environmental Information Processing	Signal transduction	22	795	194	7679	0.357851	0.768328	1.09536	Abcc4;Adcy2;Adcy7;Adora1;Adora2a;Atp1a3;Atp1b1;Bdnf;Camk2b;Cftr;Creb3l4;Drd1;Ednra;F2r;Ffar2;Gria3;Mapk10;Niacr1;Pak1;Rac2;Rras2;Vav1	rno04024
rno04060	Cytokine-cytokine receptor interaction	Environmental Information Processing	Signaling molecules and interaction	69	795	240	7679	5.39256e-16	7.87313e-14	2.777	Bmpr1b;Ccl12;Ccl17;Ccl2;Ccl22;Ccl5;Ccl7;Ccl9;Ccr1l1;Ccr3;Ccr4;Ccr5;Ccr7;Cd40;Csf1r;Csf2ra;Csf2rb;Csf3r;Cx3cr1;Cxcl1;Cxcl10;Cxcl11;Cxcl13;Cxcl2;Cxcl3;Cxcl6;Cxcl9;Cxcr2;Cxcr4;Fas;Gdf5;Il10;Il11;Il17b;Il17f;Il17ra;Il18;Il18rap;Il1a;Il1b;Il1r1;Il1r2;Il20ra;Il21r;Il22ra1;Il2ra;Il2rb;Il2rg;Il6;Inhba;Inhbb;Lif;Met;Osmr;Pdgfrb;Relt;Tgfb1;Tgfb2;Tgfb3;Tnfrsf10b;Tnfrsf11b;Tnfrsf12a;Tnfrsf18;Tnfrsf1b;Tnfrsf8…	rno04060
rno04062	Chemokine signaling pathway	Organismal Systems	Immune system	42	795	172	7679	6.84421e-08	1.81683e-06	2.35862	Adcy2;Adcy7;Ccl12;Ccl17;Ccl2;Ccl22;Ccl5;Ccl7;Ccl9;Ccr1l1;Ccr3;Ccr4;Ccr5;Ccr7;Cx3cr1;Cxcl1;Cxcl10;Cxcl11;Cxcl13;Cxcl2;Cxcl3;Cxcl6;Cxcl9;Cxcr2;Cxcr4;Dock2;Fgr;Gnb4;Gng13;Gng2;Gng4;Gngt2;Hck;Jak3;Lyn;Ncf1;Pak1;Plcb1;Prex1;Rac2;Vav1;Was	rno04062
rno04064	NF-kappa B signaling pathway	Environmental Information Processing	Signal transduction	17	795	89	7679	0.00896804	0.0450986	1.845	Bcl2a1;Btk;Card11;Card14;Cd14;Cd40;Cxcl2;Gadd45b;Icam1;Il1b;Il1r1;Lbp;Lck;Lyn;Plau;Ptgs2;Syk	rno04064
rno04066	HIF-1 signaling pathway	Environmental Information Processing	Signal transduction	16	795	99	7679	0.0469347	0.17348	1.56107	Angpt4;Camk2b;Cybb;Edn1;Eno1;Hk3;Hmox1;Igf1;Il6;Ldha;Nos2;Pgk1;Serpine1;Slc2a1;Tfrc;Timp1	rno04066
rno04068	FoxO signaling pathway	Environmental Information Processing	Signal transduction	15	795	130	7679	0.368496	0.779716	1.11451	Ccnb1;Ccnb2;Cdkn2b;Gadd45b;Gadd45g;Igf1;Il10;Il6;Mapk10;Plk1;Plk3;Plk4;Tgfb1;Tgfb2;Tgfb3	rno04068
rno04070	Phosphatidylinositol signaling system	Environmental Information Processing	Signal transduction	2	795	97	7679	0.999713	1	0.199157	Inpp5d;Plcb1	rno04070
rno04071	Sphingolipid signaling pathway	Environmental Information Processing	Signal transduction	8	795	119	7679	0.93566	1	0.649353	Adora1;Fcer1a;Fcer1g;Mapk10;Plcb1;Rac2;Sgms2;Sphk1	rno04071
rno04072	Phospholipase D signaling pathway	Environmental Information Processing	Signal transduction	17	795	146	7679	0.341111	0.748906	1.12469	Adcy2;Adcy7;Cxcr2;Cyth4;F2r;Fcer1a;Fcer1g;Pdgfrb;Pik3cg;Pik3r5;Pla2g4f;Plcb1;Plpp1;Ptgfr;Rras2;Sphk1;Syk	rno04072
rno04080	Neuroactive ligand-receptor interaction	Environmental Information Processing	Signaling molecules and interaction	43	795	313	7679	0.0314587	0.124583	1.32697	Adora1;Adora2a;Adra1d;Adra2b;Apln;Aplnr;Bdkrb1;C3ar1;C5ar1;Chrna4;Cnr2;Cysltr2;Drd1;Ednra;Ednrb;F2r;F2rl1;F2rl2;Fpr1;Gabrb3;Gabrp;Glra1;Gpr83;Gria3;Grid2;Grpr;Hrh1;Htr2a;Htr7;Ltb4r;Ltb4r2;Mc1r;Npy4r;Ntsr2;P2rx4;P2rx5;P2ry13;P2ry6;Ptafr;Ptgfr;Ptgir;Tac3;Trh	rno04080
rno04110	Cell cycle	Cellular Processes	Cell growth and death	35	795	123	7679	1.38961e-08	4.05765e-07	2.74853	Bub1;Bub1b;Ccna2;Ccnb1;Ccnb2;Ccne1;Cdc20;Cdc25c;Cdc45;Cdc6;Cdc7;Cdk1;Cdkn2b;Chek1;Dbf4;E2f1;E2f3;Espl1;Gadd45b;Gadd45g;Mad2l1;Mcm2;Mcm3;Mcm4;Mcm5;Mcm6;Orc6;Pkmyt1;Plk1;Pttg1;Rbl1;Tgfb1;Tgfb2;Tgfb3;Ttk	rno04110
rno04114	Oocyte meiosis	Cellular Processes	Cell growth and death	20	795	112	7679	0.0103289	0.0494433	1.72484	Adcy2;Adcy7;Aurka;Bub1;Camk2b;Ccnb1;Ccnb2;Ccne1;Cdc20;Cdc25c;Cdk1;Espl1;Fbxo5;Igf1;Mad2l1;Pgr;Pkmyt1;Plk1;Pttg1;Sgo1	rno04114
rno04115	p53 signaling pathway	Cellular Processes	Cell growth and death	15	795	66	7679	0.00253712	0.0157626	2.19525	Ccnb1;Ccnb2;Ccne1;Cdk1;Chek1;Fas;Gadd45b;Gadd45g;Gtse1;Igf1;Pmaip1;Rrm2;Serpine1;Thbs1;Tp73	rno04115
rno04120	Ubiquitin mediated proteolysis	Genetic Information Processing	Folding, sorting and degradation	7	795	132	7679	0.987144	1	0.512226	Brca1;Cdc20;Klhl13;Socs3;Ube2c;Ube2l6;Ube2q2l	rno04120
rno04130	SNARE interactions in vesicular transport	Genetic Information Processing	Folding, sorting and degradation	1	795	33	7679	0.97307	1	0.292701	Ykt6	rno04130
rno04137	Mitophagy - animal	Cellular Processes	Transport and catabolism	3	795	63	7679	0.965417	1	0.459958	E2f1;Mapk10;Rras2	rno04137
rno04140	Autophagy - animal	Cellular Processes	Transport and catabolism	4	795	129	7679	0.999536	1	0.299508	Mapk10;Rras2;Tp53inp2;Vmp1	rno04140
rno04141	Protein processing in endoplasmic reticulum	Genetic Information Processing	Folding, sorting and degradation	17	795	160	7679	0.493402	0.90183	1.02628	Bag2;Bak1;Calr;Casp12;Ckap4;Cryab;Edem1;Erp29;Mapk10;P4hb;Pdia6;Sec24d;Sec61b;Sec61g;Ssr2;Ssr4;Txndc5	rno04141
rno04142	Lysosome	Cellular Processes	Transport and catabolism	9	795	125	7679	0.911551	1	0.695457	Cd68;Ctsk;Ctss;Ctsz;Laptm5;Lgmn;Litaf;Napsa;Slc11a1	rno04142
rno04144	Endocytosis	Cellular Processes	Transport and catabolism	18	795	256	7679	0.974886	1	0.679157	Amph;Arpc1b;Cav3;Ccr5;Cxcr2;Cxcr4;Cyth4;Ehd3;Folr2;Il2ra;Il2rb;Il2rg;Kif5c;Ldlr;RT1-CE3;RT1-N3;Tfrc;Was	rno04144
rno04145	Phagosome	Cellular Processes	Transport and catabolism	44	795	169	7679	4.06347e-09	1.31837e-07	2.5148	Atp6v1e2;C3;Calr;Cd14;Clec7a;Coro1a;Ctss;Cybb;Fcar;Fcgr1a;Fcgr3a;Itga2;Itga5;Itgam;Itgav;Itgb1;Itgb2;Msr1;Ncf1;Ncf2;Ncf4;Olr1;RGD1565355;RT1-Bb;RT1-CE3;RT1-Da;RT1-Db1;RT1-DMb;RT1-DOb;RT1-N3;Sec61b;Sec61g;Tfrc;Thbs1;Thbs2;Thbs4;Tlr2;Tuba1a;Tuba1b;Tubb1;Tubb2a;Tubb2b;Tubb3;Tubb5	rno04145
rno04146	Peroxisome	Cellular Processes	Transport and catabolism	3	795	81	7679	0.99256	1	0.357745	Idh1;Nos2;Prdx1	rno04146
rno04150	mTOR signaling pathway	Environmental Information Processing	Signal transduction	4	795	150	7679	0.999931	1	0.257577	Atp6v1e2;Igf1;Slc7a5;Wnt9b	rno04150
rno04151	PI3K-Akt signaling pathway	Environmental Information Processing	Signal transduction	58	795	335	7679	4.82133e-05	0.000639922	1.67233	Angpt4;Areg;Bdnf;Brca1;Ccne1;Col1a1;Col1a2;Col4a1;Col4a2;Col6a2;Col6a3;Creb3l4;Csf1r;Csf3r;Ereg;F2r;Fgf18;Fgf9;Fn1;Gnb4;Gng13;Gng2;Gng4;Gngt2;Igf1;Il2ra;Il2rb;Il2rg;Il6;Itga10;Itga2;Itga4;Itga5;Itga8;Itgav;Itgb1;Jak3;Lamb1;Lamc1;Met;NEWGENE_621351;Ngf;Nr4a1;Osmr;Pdgfrb;Pik3cg;Pik3r5;RGD1560020_predicted;Spp1;Syk;Thbs1;Thbs2;Thbs4;Tlr2;Tnc;Tnn;Vegfc;Vwf	rno04151
rno04152	AMPK signaling pathway	Environmental Information Processing	Signal transduction	5	795	123	7679	0.996984	1	0.392647	Ccna2;Cftr;Creb3l4;Igf1;RGD1565355	rno04152
rno04210	Apoptosis	Cellular Processes	Cell growth and death	19	795	134	7679	0.0964621	0.299648	1.36958	Bak1;Bcl2a1;Birc5;Casp12;Csf2rb;Ctsk;Ctss;Ctsz;Fas;Gadd45b;Gadd45g;Lmnb1;Lmnb2;Mapk10;Ngf;Pmaip1;Tnfrsf10b;Tuba1a;Tuba1b	rno04210
rno04211	Longevity regulating pathway - mammal	Organismal Systems	Aging	4	795	89	7679	0.986171	1	0.434118	Adcy2;Adcy7;Creb3l4;Igf1	rno04211
rno04213	Longevity regulating pathway - multiple species	Organismal Systems	Aging	4	795	62	7679	0.896405	1	0.623169	Adcy2;Adcy7;Cryab;Igf1	rno04213
rno04215	Apoptosis - multiple species	Cellular Processes	Cell growth and death	4	795	32	7679	0.426293	0.844361	1.20739	Bak1;Birc5;Mapk10;Pmaip1	rno04215
rno04216	Ferroptosis	Cellular Processes	Cell growth and death	7	795	39	7679	0.1025	0.315054	1.73369	Alox15;Cybb;Hmox1;Slc39a14;Slc39a8;Slc7a11;Tfrc	rno04216
rno04217	Necroptosis	Cellular Processes	Cell growth and death	23	795	145	7679	0.0244399	0.101949	1.53214	Alox15;Camk2b;Cybb;Fas;H2afx;H2afy2;Hist1h2ac;Hist1h2ah;Hist1h2ai;Hist1h2ak;Hist1h2an;Hist1h2ao;Hist2h2aa3;Hist2h2ac;Il1a;Il1b;Jak3;Mapk10;Nlrp3;Pla2g4f;Ripk3;Tnfrsf10b;Zbp1	rno04217
rno04218	Cellular senescence	Cellular Processes	Cell growth and death	25	795	173	7679	0.0529678	0.19247	1.39583	Ccna2;Ccnb1;Ccnb2;Ccne1;Cdk1;Cdkn2b;Chek1;E2f1;E2f3;Foxm1;Gadd45b;Gadd45g;Gata4;Il1a;Il6;Map2k3;Mybl2;Rbl1;Rras2;RT1-CE3;RT1-N3;Serpine1;Tgfb1;Tgfb2;Tgfb3	rno04218
rno04260	Cardiac muscle contraction	Organismal Systems	Circulatory system	7	795	75	7679	0.670687	1	0.901518	Atp1a3;Atp1b1;Cox6a2;Myl4;Tnnc1;Tpm3;Tpm4	rno04260
rno04261	Adrenergic signaling in cardiomyocytes	Organismal Systems	Circulatory system	15	795	143	7679	0.519516	0.924991	1.01319	Adcy2;Adcy7;Adra1d;Atp1a3;Atp1b1;Camk2b;Creb3l4;Myl4;Pik3cg;Pik3r5;Plcb1;Scn5a;Tnnc1;Tpm3;Tpm4	rno04261
rno04270	Vascular smooth muscle contraction	Organismal Systems	Circulatory system	12	795	130	7679	0.706368	1	0.891611	Actg2;Adcy2;Adcy7;Adora2a;Adra1d;Edn1;Ednra;Pla2g2d;Pla2g4f;Plcb1;Ptgir;Ramp3	rno04270
rno04310	Wnt signaling pathway	Environmental Information Processing	Signal transduction	13	795	143	7679	0.731418	1	0.878102	Camk2b;Gpc4;Mapk10;Mmp7;Peg12;Plcb1;Prickle1;Rac2;Sfrp1;Sfrp4;Wif1;Wisp1;Wnt9b	rno04310
rno04350	TGF-beta signaling pathway	Environmental Information Processing	Signal transduction	12	795	84	7679	0.155775	0.433202	1.37987	Bmpr1b;Cdkn2b;Fst;Gdf5;Gdf6;Inhba;Inhbb;Rbl1;Tgfb1;Tgfb2;Tgfb3;Thbs1	rno04350
rno04360	Axon guidance	Organismal Systems	Development and regeneration	19	795	175	7679	0.449298	0.874634	1.0487	Bmpr1b;Camk2b;Cfl1;Cfl2;Cxcr4;Enah;Ephb2;Fes;Itgb1;Met;Pak1;Plxnc1;Rac2;Rnd1;Robo2;Sema3d;Slit2;Slit3;Unc5a	rno04360
rno04370	VEGF signaling pathway	Environmental Information Processing	Signal transduction	5	795	57	7679	0.716833	1	0.847291	Pla2g4f;Ptgs2;Rac2;Sh2d2a;Sphk1	rno04370
rno04371	Apelin signaling pathway	Environmental Information Processing	Signal transduction	21	795	134	7679	0.0343898	0.132129	1.51374	Adcy2;Adcy7;Apln;Aplnr;Ctgf;Egr1;Gnb4;Gng13;Gng2;Gng4;Gngt2;Myl4;Nos2;Pik3cg;Pik3r5;Plat;Plcb1;Rras2;Serpine1;Sphk1;Spp1	rno04371
rno04380	Osteoclast differentiation	Organismal Systems	Development and regeneration	31	795	122	7679	1.45452e-06	2.83146e-05	2.45437	Btk;Csf1r;Ctsk;Fcgr1a;Fcgr3a;Il1a;Il1b;Il1r1;Lck;Lilra5;Lilrb1;Lilrb3;Lilrb3a;Lilrb3l;Lilrb4;Lilrc2;Mapk10;Ncf1;Ncf2;Ncf4;Oscar;Pirb;Sirpa;Socs3;Spi1;Syk;Tgfb1;Tgfb2;Tnfrsf11b;Trem2;Tyrobp	rno04380
rno04390	Hippo signaling pathway	Environmental Information Processing	Signal transduction	15	795	152	7679	0.618427	0.989398	0.953203	Areg;Birc5;Bmpr1b;Crb2;Ctgf;Gdf5;Gdf6;Itgb2;Serpine1;Tead4;Tgfb1;Tgfb2;Tgfb3;Tp73;Wnt9b	rno04390
rno04392	Hippo signaling pathway - multiple species	Environmental Information Processing	Signal transduction	2	795	28	7679	0.802052	1	0.689937	Pak1;Tead4	rno04392
rno04510	Focal adhesion	Cellular Processes	Cellular community - eukaryotes	38	795	196	7679	9.10826e-05	0.00110817	1.87269	Actn1;Cav3;Col1a1;Col1a2;Col4a1;Col4a2;Col6a2;Col6a3;Flnc;Fn1;Igf1;Itga10;Itga2;Itga4;Itga5;Itga8;Itgav;Itgb1;Lamb1;Lamc1;Mapk10;Met;Myl12a;NEWGENE_621351;Pak1;Parvg;Pdgfrb;Rac2;Rasgrf1;Spp1;Thbs1;Thbs2;Thbs4;Tnc;Tnn;Vav1;Vegfc;Vwf	rno04510
rno04512	ECM-receptor interaction	Environmental Information Processing	Signaling molecules and interaction	30	795	82	7679	1.92162e-10	9.3519e-09	3.53382	Cd44;Col1a1;Col1a2;Col4a1;Col4a2;Col6a2;Col6a3;Fn1;Gp6;Hmmr;Hspg2;Itga10;Itga2;Itga4;Itga5;Itga8;Itgav;Itgb1;Lamb1;Lamc1;NEWGENE_621351;RGD1565355;Spp1;Sv2c;Thbs1;Thbs2;Thbs4;Tnc;Tnn;Vwf	rno04512
rno04514	Cell adhesion molecules (CAMs)	Environmental Information Processing	Signaling molecules and interaction	36	795	155	7679	2.14803e-06	3.68955e-05	2.24341	Cd2;Cd22;Cd40;Cd80;Cd8b;Cldn15;Cldn2;Ctla4;Icam1;Icos;Itga4;Itga8;Itgal;Itgam;Itgav;Itgb1;Itgb2;Ncam1;Nrxn3;Pdcd1lg2;Ptprc;PVR;RT1-Bb;RT1-CE3;RT1-Da;RT1-Db1;RT1-DMb;RT1-DOb;RT1-N3;Sell;Selp;Selplg;Siglec1;Spn;Vcan;Vtcn1	rno04514
rno04520	Adherens junction	Cellular Processes	Cellular community - eukaryotes	6	795	71	7679	0.75777	1	0.816264	Actn1;Met;Ptpn6;Rac2;Snai1;Was	rno04520
rno04530	Tight junction	Cellular Processes	Cellular community - eukaryotes	20	795	165	7679	0.259635	0.606508	1.1708	Actn1;Cftr;Cldn15;Cldn2;Gata4;Hcls1;Itgb1;Mapk10;Micall2;Msn;Myh1;Myh10;Myh2;Myh3;Myh4;Myl12a;Rab13;Tuba1a;Tuba1b;Was	rno04530
rno04540	Gap junction	Cellular Processes	Cellular community - eukaryotes	16	795	86	7679	0.0141264	0.066115	1.79705	Adcy2;Adcy7;Cdk1;Drd1;Gja1;Htr2a;Pdgfrb;Plcb1;Prkg2;Tuba1a;Tuba1b;Tubb1;Tubb2a;Tubb2b;Tubb3;Tubb5	rno04540
rno04550	Signaling pathways regulating pluripotency of stem cells	Cellular Processes	Cellular community - eukaryotes	9	795	135	7679	0.948264	1	0.643941	Bmpr1b;Igf1;Inhba;Inhbb;Jak3;Lif;Skil;Wnt9b;Zic3	rno04550
rno04610	Complement and coagulation cascades	Organismal Systems	Immune system	29	795	80	7679	4.99472e-10	1.82307e-08	3.50143	Bdkrb1;C1qa;C1qb;C1qc;C2;C3;C3ar1;C4bpa;C5ar1;Cd55;Cfi;F10;F2r;F2rl2;F3;F5;Fgg;Itgam;Itgax;Itgb2;Masp1;Plat;Plau;Plaur;Procr;Serpinb2;Serpine1;Vsig4;Vwf	rno04610
rno04611	Platelet activation	Organismal Systems	Immune system	24	795	124	7679	0.00177262	0.0120373	1.86951	Adcy2;Adcy7;Btk;Col1a1;Col1a2;Col3a1;F2r;Fcer1g;Fermt3;Fgg;Gp6;Itga2;Itgb1;Lyn;Myl12a;NEWGENE_621351;Pik3cg;Pik3r5;Pla2g4f;Plcb1;Prkg2;Ptgir;Syk;Vwf	rno04611
rno04612	Antigen processing and presentation	Organismal Systems	Immune system	14	795	78	7679	0.0278223	0.114424	1.73369	Calr;Cd74;Cd8b;Ciita;Ctss;Ifi30;Lgmn;RT1-Bb;RT1-CE3;RT1-Da;RT1-Db1;RT1-DMb;RT1-DOb;RT1-N3	rno04612
rno04614	Renin-angiotensin system	Organismal Systems	Endocrine system	4	795	35	7679	0.497242	0.90183	1.1039	Cma1;Cpa3;Mcpt1l1;Ren	rno04614
rno04620	Toll-like receptor signaling pathway	Organismal Systems	Immune system	20	795	91	7679	0.000830029	0.00673246	2.12288	Ccl5;Cd14;Cd40;Cd80;Ctsk;Cxcl10;Cxcl11;Cxcl9;Il1b;Il6;Irf5;Lbp;Map2k3;Mapk10;Spp1;Tlr1;Tlr2;Tlr7;Tlr8;Tlr9	rno04620
rno04621	NOD-like receptor signaling pathway	Organismal Systems	Immune system	31	795	154	7679	0.000197322	0.00201806	1.94437	Aim2;Camp;Casp12;Ccl12;Ccl2;Ccl5;Cxcl1;Cxcl2;Cxcl3;Cybb;Gbp2;Gsdmd;Il18;Il1b;Il6;Mapk10;Mefv;Naip5;Naip6;Nlrc4;Nlrp1a;Nlrp3;Oas1a;Oas1b;Oas2;Oas3;Plcb1;Ripk3;Trpm2;Trpv2;Txn1	rno04621
rno04622	RIG-I-like receptor signaling pathway	Organismal Systems	Immune system	3	795	60	7679	0.955812	1	0.482956	Cxcl10;Dhx58;Mapk10	rno04622
rno04623	Cytosolic DNA-sensing pathway	Organismal Systems	Immune system	10	795	52	7679	0.0381893	0.144822	1.85752	Aim2;Ccl5;Cxcl10;Il18;Il1b;Il6;Mb21d1;Polr2l;Ripk3;Zbp1	rno04623
rno04625	C-type lectin receptor signaling pathway	Organismal Systems	Immune system	19	795	108	7679	0.0142645	0.066115	1.69929	Bcl3;Ccl17;Ccl22;Clec4d;Clec4e;Clec7a;Egr2;Egr3;Fcer1g;Il10;Il1b;Il6;Mapk10;Nlrp3;Pak1;Plk3;Ptgs2;Rras2;Syk	rno04625
rno04630	Jak-STAT signaling pathway	Environmental Information Processing	Signal transduction	19	795	151	7679	0.215434	0.537664	1.21539	Aox2;Csf2ra;Csf2rb;Csf3r;Il10;Il11;Il20ra;Il21r;Il22ra1;Il2ra;Il2rb;Il2rg;Il6;Jak3;Lif;Osmr;Pdgfrb;Ptpn6;Socs3	rno04630
rno04640	Hematopoietic cell lineage	Organismal Systems	Immune system	35	795	87	7679	2.16775e-13	1.58246e-11	3.88585	Cd14;Cd2;Cd22;Cd33;Cd37;Cd38;Cd3e;Cd44;Cd55;Cd8b;Csf1r;Csf2ra;Csf3r;Dntt;Fcgr1a;Gypa;Il11;Il1a;Il1b;Il1r1;Il1r2;Il2ra;Il6;Itga2;Itga4;Itga5;Itgam;RGD1565355;RT1-Bb;RT1-Da;RT1-Db1;RT1-DMb;RT1-DOb;Siglech;Tfrc	rno04640
rno04650	Natural killer cell mediated cytotoxicity	Organismal Systems	Immune system	24	795	125	7679	0.00198492	0.0131727	1.85455	Cd247;Fas;Fcer1g;Fcgr3a;Hcst;Icam1;Itgal;Itgb2;Klrk1;Lck;Ncr3;Pak1;Ptpn6;Rac2;Raet1c;Raet1d;Raet1e;RT1-CE3;RT1-N3;Sh2d1b;Syk;Tnfrsf10b;Tyrobp;Vav1	rno04650
rno04657	IL-17 signaling pathway	Organismal Systems	Immune system	22	795	91	7679	0.00010832	0.00121651	2.33517	Ccl12;Ccl17;Ccl2;Ccl7;Cxcl1;Cxcl10;Cxcl2;Cxcl3;Cxcl6;Il17b;Il17f;Il17ra;Il1b;Il6;Lcn2;Mapk10;Mmp9;Muc5ac;Muc5b;Ptgs2;S100a8;S100a9	rno04657
rno04658	Th1 and Th2 cell differentiation	Organismal Systems	Immune system	16	795	88	7679	0.0174169	0.0770564	1.7562	Cd247;Cd3e;Il2ra;Il2rb;Il2rg;Jak3;Lck;Mapk10;Nfkbie;RT1-Bb;RT1-Da;RT1-Db1;RT1-DMb;RT1-DOb;Runx3;Tbx21	rno04658
rno04659	Th17 cell differentiation	Organismal Systems	Immune system	21	795	102	7679	0.00151264	0.010773	1.98864	Cd247;Cd3e;Il17f;Il1b;Il1r1;Il21r;Il2ra;Il2rb;Il2rg;Il6;Jak3;Lck;Mapk10;Nfkbie;RT1-Bb;RT1-Da;RT1-Db1;RT1-DMb;RT1-DOb;Tbx21;Tgfb1	rno04659
rno04660	T cell receptor signaling pathway	Organismal Systems	Immune system	13	795	101	7679	0.243428	0.58263	1.24325	Card11;Cd247;Cd3e;Cd8b;Ctla4;Icos;Il10;Lck;Nfkbie;Pak1;Ptpn6;Ptprc;Vav1	rno04660
rno04662	B cell receptor signaling pathway	Organismal Systems	Immune system	12	795	70	7679	0.0540498	0.19247	1.65585	Btk;Card11;Cd22;Ifitm1;Inpp5d;Lyn;Nfkbie;Pirb;Ptpn6;Rac2;Syk;Vav1	rno04662
rno04664	Fc epsilon RI signaling pathway	Organismal Systems	Immune system	11	795	65	7679	0.0684407	0.227099	1.63462	Btk;Fcer1a;Fcer1g;Inpp5d;Lyn;Map2k3;Mapk10;Pla2g4f;Rac2;Syk;Vav1	rno04664
rno04666	Fc gamma R-mediated phagocytosis	Organismal Systems	Immune system	19	795	85	7679	0.00089353	0.00705164	2.1591	Amph;Arpc1b;Cfl1;Cfl2;Dock2;Fcgr1a;Hck;Inpp5d;Lyn;Myo10;Ncf1;Pak1;Plpp1;Ptprc;Rac2;Sphk1;Syk;Vav1;Was	rno04666
rno04668	TNF signaling pathway	Environmental Information Processing	Signal transduction	23	795	106	7679	0.000423524	0.00363733	2.09585	Bcl3;Ccl12;Ccl2;Ccl5;Creb3l4;Cxcl1;Cxcl10;Cxcl2;Cxcl3;Edn1;Fas;Icam1;Ifi47;Il1b;Il6;Lif;Map2k3;Mapk10;Mmp9;Ptgs2;Ripk3;Socs3;Tnfrsf1b	rno04668
rno04670	Leukocyte transendothelial migration	Organismal Systems	Immune system	21	795	113	7679	0.00548079	0.0285784	1.79506	Actn1;Cldn15;Cldn2;Cxcr4;Cybb;Icam1;Itga4;Itgal;Itgam;Itgb1;Itgb2;Mmp2;Mmp9;Msn;Myl12a;Ncf1;Ncf2;Ncf4;Rac2;Thy1;Vav1	rno04670
rno04672	Intestinal immune network for IgA production	Organismal Systems	Immune system	13	795	42	7679	0.000208851	0.00203281	2.98973	Cd40;Cd80;Cxcr4;Icos;Il10;Il6;Itga4;RT1-Bb;RT1-Da;RT1-Db1;RT1-DMb;RT1-DOb;Tgfb1	rno04672
rno04710	Circadian rhythm	Organismal Systems	Environmental adaptation	1	795	30	7679	0.962569	1	0.321971	Bhlhe40	rno04710
rno04713	Circadian entrainment	Organismal Systems	Environmental adaptation	11	795	96	7679	0.408609	0.822854	1.10677	Adcy2;Adcy7;Camk2b;Gnb4;Gng13;Gng2;Gng4;Gngt2;Gria3;Plcb1;Prkg2	rno04713
rno04714	Thermogenesis	Organismal Systems	Environmental adaptation	7	795	214	7679	0.999978	1	0.315953	Adcy2;Adcy7;Cox6a2;Creb3l4;Map2k3;Ndufa4l2;Prkg2	rno04714
rno04720	Long-term potentiation	Organismal Systems	Nervous system	2	795	66	7679	0.993798	1	0.292701	Camk2b;Plcb1	rno04720
rno04721	Synaptic vesicle cycle	Organismal Systems	Nervous system	2	795	62	7679	0.990882	1	0.311584	Atp6v1e2;Slc17a6	rno04721
rno04722	Neurotrophin signaling pathway	Organismal Systems	Nervous system	8	795	119	7679	0.93566	1	0.649353	Bdnf;Camk2b;Mapk10;Matk;Nfkbie;Ngf;Sh2b2;Tp73	rno04722
rno04723	Retrograde endocannabinoid signaling	Organismal Systems	Nervous system	15	795	138	7679	0.461739	0.875505	1.0499	Adcy2;Adcy7;Gabrb3;Gabrp;Gnb4;Gng13;Gng2;Gng4;Gngt2;Gria3;Mapk10;Ndufa4l2;Plcb1;Ptgs2;Slc17a6	rno04723
rno04724	Glutamatergic synapse	Organismal Systems	Nervous system	11	795	112	7679	0.620068	0.989398	0.948664	Adcy2;Adcy7;Gnb4;Gng13;Gng2;Gng4;Gngt2;Gria3;Pla2g4f;Plcb1;Slc17a6	rno04724
rno04725	Cholinergic synapse	Organismal Systems	Nervous system	15	795	111	7679	0.170977	0.466591	1.30529	Adcy2;Adcy7;Camk2b;Chrna4;Creb3l4;Gnb4;Gng13;Gng2;Gng4;Gngt2;Kcnj2;Pik3cg;Pik3r5;Plcb1;Slc5a7	rno04725
rno04726	Serotonergic synapse	Organismal Systems	Nervous system	14	795	119	7679	0.347713	0.757703	1.13637	Alox15;Cyp2d1;Gabrb3;Gnb4;Gng13;Gng2;Gng4;Gngt2;Htr2a;Htr7;Pla2g4f;Plcb1;Ptgs2;Tph1	rno04726
rno04727	GABAergic synapse	Organismal Systems	Nervous system	9	795	87	7679	0.553289	0.939305	0.999219	Adcy2;Adcy7;Gabrb3;Gabrp;Gnb4;Gng13;Gng2;Gng4;Gngt2	rno04727
rno04728	Dopaminergic synapse	Organismal Systems	Nervous system	12	795	129	7679	0.696191	1	0.898523	Camk2b;Creb3l4;Drd1;Gnb4;Gng13;Gng2;Gng4;Gngt2;Gria3;Kif5c;Mapk10;Plcb1	rno04728
rno04730	Long-term depression	Organismal Systems	Nervous system	7	795	60	7679	0.429487	0.844361	1.1269	Gria3;Grid2;Igf1;Lyn;Pla2g4f;Plcb1;Prkg2	rno04730
rno04740	Olfactory transduction	Organismal Systems	Sensory system	6	795	1088	7679	1	1	0.0532672	Camk2b;Gng13;Olr1584;Olr59;Olr63;Prkg2	rno04740
rno04742	Taste transduction	Organismal Systems	Sensory system	3	795	86	7679	0.995224	1	0.336946	Gng13;Scnn1a;Trpm5	rno04742
rno04750	Inflammatory mediator regulation of TRP channels	Organismal Systems	Sensory system	17	795	111	7679	0.0636485	0.216109	1.47932	Adcy2;Adcy7;Bdkrb1;Camk2b;F2rl1;Hrh1;Htr2a;Igf1;Il1b;Il1r1;Map2k3;Mapk10;Ngf;Pla2g4f;Plcb1;Trpm8;Trpv2	rno04750
rno04810	Regulation of actin cytoskeleton	Cellular Processes	Cell motility	36	795	208	7679	0.00129893	0.00972529	1.67177	Actn1;Arpc1b;Bdkrb1;Cd14;Cfl1;Cfl2;Diaph3;Enah;F2r;Fgd3;Fgf18;Fgf9;Fn1;Insrr;Iqgap3;Itga10;Itga2;Itga4;Itga5;Itga8;Itgal;Itgam;Itgav;Itgax;Itgb1;Itgb2;Msn;Myh10;Myl12a;Nckap1l;Pak1;Pdgfrb;Rac2;Rras2;Vav1;Was	rno04810
rno04910	Insulin signaling pathway	Organismal Systems	Endocrine system	4	795	134	7679	0.999704	1	0.288332	Hk3;Mapk10;Sh2b2;Socs3	rno04910
rno04911	Insulin secretion	Organismal Systems	Endocrine system	8	795	85	7679	0.665481	1	0.909094	Adcy2;Adcy7;Atp1a3;Atp1b1;Camk2b;Creb3l4;Plcb1;Slc2a1	rno04911
rno04912	GnRH signaling pathway	Organismal Systems	Endocrine system	9	795	89	7679	0.581672	0.96252	0.976765	Adcy2;Adcy7;Camk2b;Hbegf;Map2k3;Mapk10;Mmp2;Pla2g4f;Plcb1	rno04912
rno04913	Ovarian Steroidogenesis	Organismal Systems	Endocrine system	7	795	51	7679	0.272993	0.632652	1.32576	Adcy2;Adcy7;Cyp1b1;Igf1;Ldlr;Pla2g4f;Ptgs2	rno04913
rno04914	Progesterone-mediated oocyte maturation	Organismal Systems	Endocrine system	16	795	88	7679	0.0174169	0.0770564	1.7562	Adcy2;Adcy7;Aurka;Bub1;Ccna2;Ccnb1;Ccnb2;Cdc25c;Cdk1;Igf1;Kif22;Mad2l1;Mapk10;Pgr;Pkmyt1;Plk1	rno04914
rno04915	Estrogen signaling pathway	Organismal Systems	Endocrine system	10	795	130	7679	0.878118	1	0.743009	Adcy2;Adcy7;Creb3l4;Hbegf;Krt14;Krt17;Mmp2;Mmp9;Pgr;Plcb1	rno04915
rno04916	Melanogenesis	Organismal Systems	Endocrine system	9	795	98	7679	0.697747	1	0.887062	Adcy2;Adcy7;Camk2b;Creb3l4;Edn1;Ednrb;Mc1r;Plcb1;Wnt9b	rno04916
rno04917	Prolactin signaling pathway	Organismal Systems	Endocrine system	2	795	72	7679	0.996541	1	0.268309	Mapk10;Socs3	rno04917
rno04918	Thyroid hormone synthesis	Organismal Systems	Endocrine system	10	795	72	7679	0.20755	0.526996	1.34154	Adcy2;Adcy7;Atp1a3;Atp1b1;Creb3l4;Gpx2;Gpx7;Pax8;Plcb1;Tg	rno04918
rno04919	Thyroid hormone signaling pathway	Organismal Systems	Endocrine system	9	795	117	7679	0.868084	1	0.743009	Atp1a3;Atp1b1;Dio2;Dio3;Gata4;Itgav;Plcb1;Rcan1;Slc2a1	rno04919
rno04920	Adipocytokine signaling pathway	Organismal Systems	Endocrine system	6	795	71	7679	0.75777	1	0.816264	Mapk10;Nfkbie;RGD1565355;Slc2a1;Socs3;Tnfrsf1b	rno04920
rno04921	Oxytocin signaling pathway	Organismal Systems	Endocrine system	12	795	152	7679	0.875514	1	0.762562	Adcy2;Adcy7;Camk2b;Cd38;Kcnj2;Pik3cg;Pik3r5;Pla2g4f;Plcb1;Ptgs2;Rcan1;Trpm2	rno04921
rno04922	Glucagon signaling pathway	Organismal Systems	Endocrine system	6	795	100	7679	0.954891	1	0.579547	Adcy2;Camk2b;Creb3l4;Ldha;Plcb1;Slc2a1	rno04922
rno04923	Regulation of lipolysis in adipocyte	Organismal Systems	Endocrine system	6	795	55	7679	0.510779	0.915015	1.05372	Adcy2;Adcy7;Adora1;Fabp4;Prkg2;Ptgs2	rno04923
rno04924	Renin secretion	Organismal Systems	Endocrine system	11	795	68	7679	0.0887143	0.281571	1.5625	Adora1;Clca1;Clca2;Clca4;Clca4l;Clca5;Ednra;Kcnj2;Plcb1;Prkg2;Ren	rno04924
rno04925	Aldosterone synthesis and secretion	Organismal Systems	Endocrine system	9	795	94	7679	0.648733	1	0.924809	Adcy2;Adcy7;Atp1a3;Atp1b1;Camk2b;Creb3l4;Ldlr;Nr4a1;Plcb1	rno04925
rno04926	Relaxin signaling pathway	Organismal Systems	Endocrine system	23	795	126	7679	0.00472923	0.0264422	1.76317	Adcy2;Adcy7;Col1a1;Col1a2;Col3a1;Col4a1;Col4a2;Creb3l4;Edn1;Ednrb;Gnb4;Gng13;Gng2;Gng4;Gngt2;Mapk10;Mmp2;Mmp9;NEWGENE_621351;Nos2;Plcb1;Tgfb1;Vegfc	rno04926
rno04927	Cortisol synthesis and secretion	Organismal Systems	Endocrine system	7	795	63	7679	0.481737	0.901713	1.07324	Adcy2;Adcy7;Creb3l4;Cyp11b2;Ldlr;Nr4a1;Plcb1	rno04927
rno04930	Type II diabetes mellitus	Human Diseases	Endocrine and metabolic disease	3	795	47	7679	0.878248	1	0.61654	Hk3;Mapk10;Socs3	rno04930
rno04931	Insulin resistance	Human Diseases	Endocrine and metabolic disease	7	795	108	7679	0.940036	1	0.626054	Creb3l4;Il6;Mapk10;RGD1565355;Slc2a1;Socs3;Trib3	rno04931
rno04932	Non-alcoholic fatty liver disease (NAFLD)	Human Diseases	Endocrine and metabolic disease	9	795	145	7679	0.970826	1	0.599532	Cox6a2;Fas;Il1a;Il1b;Il6;Mapk10;Ndufa4l2;Socs3;Tgfb1	rno04932
rno04933	AGE-RAGE signaling pathway in diabetic complications	Human Diseases	Endocrine and metabolic disease	26	795	99	7679	5.30646e-06	8.15519e-05	2.53674	Ccl12;Ccl2;Col1a1;Col1a2;Col3a1;Col4a1;Col4a2;Cybb;Edn1;Egr1;F3;Fn1;Icam1;Il1a;Il1b;Il6;Mapk10;Mmp2;NEWGENE_621351;Nox4;Plcb1;Serpine1;Tgfb1;Tgfb2;Tgfb3;Vegfc	rno04933
rno04934	Cushing's syndrome	Human Diseases	Endocrine and metabolic disease	13	795	153	7679	0.813073	1	0.820709	Adcy2;Adcy7;Camk2b;Ccne1;Cdkn2b;Creb3l4;Cyp11b2;E2f1;E2f3;Ldlr;Nr4a1;Plcb1;Wnt9b	rno04934
rno04940	Type I diabetes mellitus	Human Diseases	Endocrine and metabolic disease	12	795	60	7679	0.0183365	0.0787389	1.93182	Cd80;Fas;Il1a;Il1b;Ptprn;RT1-Bb;RT1-CE3;RT1-Da;RT1-Db1;RT1-DMb;RT1-DOb;RT1-N3	rno04940
rno04960	Aldosterone-regulated sodium reabsorption	Organismal Systems	Excretory system	4	795	38	7679	0.564164	0.946757	1.01675	Atp1a3;Atp1b1;Igf1;Scnn1a	rno04960
rno04961	Endocrine and other factor-regulated calcium reabsorption	Organismal Systems	Excretory system	3	795	52	7679	0.916694	1	0.557257	Atp1a3;Atp1b1;Plcb1	rno04961
rno04962	Vasopressin-regulated water reabsorption	Organismal Systems	Excretory system	1	795	42	7679	0.98998	1	0.229979	Creb3l4	rno04962
rno04964	Proximal tubule bicarbonate reclamation	Organismal Systems	Excretory system	3	795	22	7679	0.402001	0.815169	1.31715	Atp1a3;Atp1b1;Car2	rno04964
rno04966	Collecting duct acid secretion	Organismal Systems	Excretory system	3	795	27	7679	0.540129	0.939305	1.07324	Atp6v1e2;Car2;Slc4a1	rno04966
rno04970	Salivary secretion	Organismal Systems	Digestive system	12	795	76	7679	0.089808	0.281978	1.52512	Adcy2;Adcy7;Adra1d;Atp1a3;Atp1b1;Bst1;Camp;Cd38;Lyz2;Muc5b;Plcb1;Prkg2	rno04970
rno04971	Gastric acid secretion	Organismal Systems	Digestive system	10	795	74	7679	0.232508	0.565769	1.30529	Adcy2;Adcy7;Atp1a3;Atp1b1;Camk2b;Car2;Cftr;Kcnj16;Kcnj2;Plcb1	rno04971
rno04972	Pancreatic secretion	Organismal Systems	Digestive system	17	795	98	7679	0.0224666	0.0950761	1.67556	Adcy2;Adcy7;Atp1a3;Atp1b1;Bst1;Car2;Cd38;Cftr;Clca1;Clca2;Clca4;Clca4l;Clca5;Cpa3;Ctrb1;Pla2g2d;Plcb1	rno04972
rno04973	Carbohydrate digestion and absorption	Organismal Systems	Digestive system	4	795	39	7679	0.585359	0.96252	0.990679	Atp1a3;Atp1b1;Hk3;Slc2a5	rno04973
rno04974	Protein digestion and absorption	Organismal Systems	Digestive system	22	795	87	7679	5.23642e-05	0.000664798	2.44254	Atp1a3;Atp1b1;Col11a1;Col12a1;Col15a1;Col18a1;Col1a1;Col1a2;Col3a1;Col4a1;Col4a2;Col5a1;Col5a2;Col6a2;Col6a3;Col7a1;Cpa3;Ctrb1;Dpp4;Eln;NEWGENE_621351;Slc15a1	rno04974
rno04975	Fat digestion and absorption	Organismal Systems	Digestive system	3	795	40	7679	0.79836	1	0.724434	Pla2g2d;Plpp1;RGD1565355	rno04975
rno04976	Bile secretion	Organismal Systems	Digestive system	13	795	71	7679	0.0287115	0.116441	1.76857	Abcb1b;Abcb4;Abcc4;Adcy2;Adcy7;Aqp8;Atp1a3;Atp1b1;Car2;Cftr;Ldlr;Slc2a1;Slc4a5	rno04976
rno04977	Vitamin digestion and absorption	Organismal Systems	Digestive system	3	795	24	7679	0.459188	0.875505	1.20739	Lrat;Rbp2;Slc52a3	rno04977
rno04978	Mineral absorption	Organismal Systems	Digestive system	7	795	43	7679	0.151236	0.424623	1.57241	Atp1a3;Atp1b1;Hmox1;S100g;Slc26a9;Steap1;Trpm6	rno04978
rno04979	Cholesterol metabolism	Organismal Systems	Digestive system	7	795	49	7679	0.240177	0.5796	1.37987	Angptl4;Apoc3;Ldlr;Lipg;Pcsk9;RGD1565355;Soat1	rno04979
rno05010	Alzheimer's disease	Human Diseases	Neurodegenerative disease	6	795	164	7679	0.999621	1	0.353382	Casp12;Cox6a2;Fas;Il1b;Ndufa4l2;Plcb1	rno05010
rno05012	Parkinson's disease	Human Diseases	Neurodegenerative disease	6	795	127	7679	0.993128	1	0.456336	Adora2a;Cox6a2;Drd1;Ndufa4l2;Sept5;Ube2l6	rno05012
rno05014	Amyotrophic lateral sclerosis (ALS)	Human Diseases	Neurodegenerative disease	3	795	53	7679	0.92291	1	0.546743	Casp12;Map2k3;Tnfrsf1b	rno05014
rno05016	Huntington's disease	Human Diseases	Neurodegenerative disease	7	795	181	7679	0.999664	1	0.373557	Bdnf;Cox6a2;Creb3l4;Hip1;Ndufa4l2;Plcb1;Polr2l	rno05016
rno05020	Prion diseases	Human Diseases	Neurodegenerative disease	11	795	34	7679	0.000416745	0.00363733	3.12501	C1qa;C1qb;C1qc;Casp12;Ccl5;Egr1;Il1a;Il1b;Il6;Lamc1;Ncam1	rno05020
rno05030	Cocaine addiction	Human Diseases	Substance dependence	3	795	47	7679	0.878248	1	0.61654	Bdnf;Creb3l4;Drd1	rno05030
rno05031	Amphetamine addiction	Human Diseases	Substance dependence	4	795	66	7679	0.92152	1	0.585401	Camk2b;Creb3l4;Drd1;Gria3	rno05031
rno05032	Morphine addiction	Human Diseases	Substance dependence	11	795	90	7679	0.326866	0.723067	1.18056	Adcy2;Adcy7;Adora1;Drd1;Gabrb3;Gabrp;Gnb4;Gng13;Gng2;Gng4;Gngt2	rno05032
rno05033	Nicotine addiction	Human Diseases	Substance dependence	5	795	40	7679	0.400097	0.815169	1.20739	Chrna4;Gabrb3;Gabrp;Gria3;Slc17a6	rno05033
rno05034	Alcoholism	Human Diseases	Substance dependence	33	795	143	7679	6.59109e-06	9.62299e-05	2.22903	Adora2a;Bdnf;Creb3l4;Drd1;Gnb4;Gng13;Gng2;Gng4;Gngt2;H2afx;H2afy2;Hist1h2ac;Hist1h2ah;Hist1h2ai;Hist1h2ail1;Hist1h2ak;Hist1h2an;Hist1h2ao;Hist1h2ba;Hist1h2bcl1;Hist1h2bd;Hist1h2bf;Hist1h2bh;Hist1h2bk;Hist1h2bl;Hist1h2bo;Hist1h3a;Hist2h2aa3;Hist2h2ac;Hist2h3c2;Hist2h4;Hist2h4a;Hist3h2bb	rno05034
rno05100	Bacterial invasion of epithelial cells	Human Diseases	Infectious disease: bacterial	9	795	75	7679	0.372417	0.782344	1.15909	Arpc1b;Cav3;Fn1;Hcls1;Itga5;Itgb1;Met;Sept11;Was	rno05100
rno05132	Salmonella infection	Human Diseases	Infectious disease: bacterial	15	795	80	7679	0.0160412	0.0731878	1.81108	Arpc1b;Cd14;Cxcl1;Cxcl2;Cxcl3;Flnc;Il18;Il1a;Il1b;Il6;Lbp;Mapk10;Nlrc4;Nos2;Was	rno05132
rno05133	Pertussis	Human Diseases	Infectious disease: bacterial	22	795	72	7679	1.86817e-06	3.40941e-05	2.9514	C1qa;C1qb;C1qc;C2;C3;C4bpa;Cd14;Cfl1;Cfl2;Cxcl6;Il10;Il1a;Il1b;Il6;Irf8;Itga5;Itgam;Itgb1;Itgb2;Mapk10;Nlrp3;Nos2	rno05133
rno05134	Legionellosis	Human Diseases	Infectious disease: bacterial	14	795	53	7679	0.000739389	0.00616861	2.55147	C3;Cd14;Cxcl1;Cxcl2;Cxcl3;Il18;Il1b;Il6;Itgam;Itgb2;Naip5;Naip6;Nlrc4;Tlr2	rno05134
rno05140	Leishmaniasis	Human Diseases	Infectious disease: parasitic	26	795	65	7679	3.2303e-10	1.3475e-08	3.86365	C3;Cybb;Fcgr1a;Fcgr3a;Il10;Il1a;Il1b;Itga4;Itgam;Itgb1;Itgb2;Ncf1;Ncf2;Ncf4;Nos2;Ptgs2;Ptpn6;RT1-Bb;RT1-Da;RT1-Db1;RT1-DMb;RT1-DOb;Tgfb1;Tgfb2;Tgfb3;Tlr2	rno05140
rno05142	Chagas disease (American trypanosomiasis)	Human Diseases	Infectious disease: parasitic	23	795	101	7679	0.000200423	0.00201806	2.1996	C1qa;C1qb;C1qc;C3;Calr;Ccl12;Ccl2;Ccl5;Cd247;Cd3e;Fas;Il10;Il1b;Il6;Mapk10;Nos2;Plcb1;Serpine1;Tgfb1;Tgfb2;Tgfb3;Tlr2;Tlr9	rno05142
rno05143	African trypanosomiasis	Human Diseases	Infectious disease: parasitic	11	795	34	7679	0.000416745	0.00363733	3.12501	F2rl1;Fas;Hbb;Icam1;Ido1;Il10;Il18;Il1b;Il6;Plcb1;Tlr9	rno05143
rno05144	Malaria	Human Diseases	Infectious disease: parasitic	26	795	52	7679	5.98819e-13	3.4971e-11	4.82956	Ccl12;Ccl2;Cd40;Gypa;Hbb;Icam1;Il10;Il18;Il1b;Il6;Itgal;Itgb2;Klrb1b;Klrb1c;Klrk1;Met;RGD1565355;Selp;Tgfb1;Tgfb2;Tgfb3;Thbs1;Thbs2;Thbs4;Tlr2;Tlr9	rno05144
rno05145	Toxoplasmosis	Human Diseases	Infectious disease: parasitic	22	795	107	7679	0.00120216	0.00923762	1.98599	Ccr5;Cd40;Ciita;Il10;Itgb1;Lamb1;Lamc1;Ldlr;Map2k3;Mapk10;Nos2;Pik3cg;Pik3r5;RT1-Bb;RT1-Da;RT1-Db1;RT1-DMb;RT1-DOb;Tgfb1;Tgfb2;Tgfb3;Tlr2	rno05145
rno05146	Amoebiasis	Human Diseases	Infectious disease: parasitic	28	795	96	7679	2.23006e-07	5.42648e-06	2.81724	Actn1;Arg1;Cd14;Col1a1;Col1a2;Col3a1;Col4a1;Col4a2;Fn1;Il10;Il1b;Il1r1;Il1r2;Il6;Itgam;Itgb2;Lamb1;Lamc1;NEWGENE_621351;Nos2;Plcb1;Serpinb10;Serpinb3a;Serpinb9;Tgfb1;Tgfb2;Tgfb3;Tlr2	rno05146
rno05150	Staphylococcus aureus infection	Human Diseases	Infectious disease: bacterial	27	795	46	7679	1.02646e-15	9.99087e-14	5.66948	C1qa;C1qb;C1qc;C2;C3;C3ar1;C5ar1;Cfi;Fcar;Fcgr1a;Fcgr3a;Fgg;Fpr1;Icam1;Il10;Itgal;Itgam;Itgb2;Masp1;Ptafr;RT1-Bb;RT1-Da;RT1-Db1;RT1-DMb;RT1-DOb;Selp;Selplg	rno05150
rno05152	Tuberculosis	Human Diseases	Infectious disease: bacterial	39	795	169	7679	9.64229e-07	2.01111e-05	2.22903	C3;Camk2b;Camp;Cd14;Cd74;Ciita;Clec4e;Clec7a;Coro1a;Ctss;Cyp27b1;Fcer1g;Fcgr1a;Fcgr3a;Il10;Il18;Il1a;Il1b;Il6;Itgam;Itgax;Itgb2;Lbp;Mapk10;Nos2;Plk3;RT1-Bb;RT1-Da;RT1-Db1;RT1-DMb;RT1-DOb;Sphk1;Syk;Tgfb1;Tgfb2;Tgfb3;Tlr1;Tlr2;Tlr9	rno05152
rno05160	Hepatitis C	Human Diseases	Infectious disease: viral	9	795	122	7679	0.896918	1	0.712558	Cldn15;Cldn2;Ldlr;Mapk10;Oas1a;Oas1b;Oas2;Oas3;Socs3	rno05160
rno05161	Hepatitis B	Human Diseases	Infectious disease: viral	18	795	134	7679	0.149848	0.424623	1.29749	Birc5;Casp12;Ccna2;Ccne1;Creb3l4;E2f1;E2f3;Egr2;Egr3;Fas;Hspg2;Il6;Mapk10;Mmp9;Tgfb1;Tgfb2;Tgfb3;Tlr2	rno05161
rno05162	Measles	Human Diseases	Infectious disease: viral	20	795	125	7679	0.0315725	0.124583	1.54546	Ccne1;Cd3e;Fas;Il1a;Il1b;Il2ra;Il2rb;Il2rg;Il6;Jak3;Msn;Oas1a;Oas1b;Oas2;Oas3;Tlr2;Tlr7;Tlr9;Tnfrsf10b;Tp73	rno05162
rno05164	Influenza A	Human Diseases	Infectious disease: viral	29	795	158	7679	0.00149	0.010773	1.77288	Ccl12;Ccl2;Ccl5;Ciita;Cxcl10;Fas;Fdps;Icam1;Il18;Il1a;Il1b;Il6;Kpna2;Map2k3;Mapk10;Nlrp3;Oas1a;Oas1b;Oas2;Oas3;Rsad2;RT1-Bb;RT1-Da;RT1-Db1;RT1-DMb;RT1-DOb;Socs3;Tlr7;Tnfrsf10b	rno05164
rno05165	Human papillomavirus infection	Human Diseases	Infectious disease: viral	39	795	327	7679	0.192696	0.497939	1.15201	Bak1;Ccna2;Ccne1;Col1a1;Col1a2;Col4a1;Col4a2;Col6a2;Col6a3;Creb3l4;E2f1;Fas;Fn1;Heyl;Itga10;Itga2;Itga4;Itga5;Itga8;Itgav;Itgb1;Lamb1;Lamc1;NEWGENE_621351;Oasl;Oasl2;Pdgfrb;Ptgs2;Rbl1;RT1-CE3;RT1-N3;Spp1;Thbs1;Thbs2;Thbs4;Tnc;Tnn;Vwf;Wnt9b	rno05165
rno05166	HTLV-I infection	Human Diseases	Infectious disease: viral	48	795	269	7679	0.00010187	0.00118984	1.72356	Adcy2;Adcy7;Bub1b;Calr;Ccnb2;Cd3e;Cd40;Cdc20;Cdkn2b;Chek1;E2f1;E2f3;Egr1;Egr2;Fdps;Icam1;Il1r1;Il1r2;Il2ra;Il2rb;Il2rg;Il6;Itgal;Itgb2;Jak3;Lck;Mad2l1;Mybl2;Pdgfrb;Pole;Pole2;Pttg1;Ran;RGD1560020_predicted;Rras2;RT1-Bb;RT1-CE3;RT1-Da;RT1-Db1;RT1-DMb;RT1-DOb;RT1-N3;Slc2a1;Spi1;Tgfb1;Tgfb2;Tgfb3;Wnt9b	rno05166
rno05167	Kaposi's sarcoma-associated herpesvirus infection	Human Diseases	Infectious disease: viral	31	795	194	7679	0.00911239	0.0450986	1.54347	Bak1;C3;Ccr1l1;Ccr3;Ccr4;Ccr5;Cd200r1;Cxcl1;Cxcl2;Cxcl3;E2f1;E2f3;Fas;Gnb4;Gng13;Gng2;Gng4;Gngt2;Hck;Icam1;Il6;Lyn;Mapk10;Pik3cg;Pik3r5;Prex1;Ptgs2;Rcan1;RT1-CE3;RT1-N3;Syk	rno05167
rno05168	Herpes simplex infection	Human Diseases	Infectious disease: viral	25	795	190	7679	0.123777	0.361429	1.27094	C3;Ccl12;Ccl2;Ccl5;Cd74;Cdk1;Cfp;Fas;Il1b;Il6;Mapk10;Oas1a;Oas1b;Oas2;Oas3;RT1-Bb;RT1-CE3;RT1-Da;RT1-Db1;RT1-DMb;RT1-DOb;RT1-N3;Socs3;Tlr2;Tlr9	rno05168
rno05169	Epstein-Barr virus infection	Human Diseases	Infectious disease: viral	23	795	204	7679	0.364131	0.776104	1.08902	Ccna2;Cd38;Cd40;Cd44;Cdk1;Entpd8;Fgr;Icam1;Il10;Itgal;Jak3;Lyn;Map2k3;Mapk10;Nfkbie;Polr2l;Ran;RT1-CE3;RT1-N3;Spi1;Spn;Syk;Vim	rno05169
rno05200	Pathways in cancer	Human Diseases	Cancer: overview	78	795	508	7679	0.000180909	0.0019565	1.48309	Adcy2;Adcy7;Arnt2;Bak1;Bdkrb1;Birc5;Camk2b;Ccne1;Cdkn2b;Cks1b;Cks2;Col4a1;Col4a2;Csf1r;Csf2ra;Csf2rb;Csf3r;Cxcr4;E2f1;E2f3;Ednra;Ednrb;F2r;Fas;Fgf18;Fgf9;Fn1;Gadd45b;Gadd45g;Gnb4;Gng13;Gng2;Gng4;Gngt2;Gsta2;Gsta3;Gsta5;Gstm1;Gstp1;Heyl;Hmox1;Igf1;Il2ra;Il2rb;Il2rg;Il6;Itga2;Itgav;Itgb1;Jak3;Lamb1;Lamc1;Mapk10;Met;Mmp2;Mmp9;Nos2;Nqo1;Pax8;Pdgfrb;Peg12;Plcb1;Pmaip1;Ptgs2;Rac2;Rad51;Rasgrp4;Ret;Slc2…	rno05200
rno05202	Transcriptional misregulation in cancers	Human Diseases	Cancer: overview	35	795	168	7679	3.70481e-05	0.000515145	2.01232	Arnt2;Bak1;Bcl11b;Bcl2a1;Cd14;Cd40;Cebpe;Csf1r;Erg;Etv4;Fcgr1a;Gadd45b;Gadd45g;Gria3;Hist1h2ail1;Hist1h3a;Hist2h3c2;Hmga2;Igf1;Il1r2;Il2rb;Il6;Itgam;Met;Mlf1;Mmp9;Mycn;Nfkbiz;Nr4a3;Pax8;Plat;Plau;Prom1;Spi1;Wt1	rno05202
rno05203	Viral carcinogenesis	Human Diseases	Cancer: overview	33	795	201	7679	0.00479944	0.0264422	1.58583	Actn1;Bak1;C3;Ccna2;Ccne1;Ccr3;Ccr4;Ccr5;Cdc20;Cdk1;Cdkn2b;Chek1;Creb3l4;Egr2;Egr3;Hist1h2ba;Hist1h2bcl1;Hist1h2bd;Hist1h2bf;Hist1h2bh;Hist1h2bk;Hist1h2bl;Hist1h2bo;Hist2h4;Hist2h4a;Hist3h2bb;Jak3;Lyn;Pmaip1;Rbl1;RT1-CE3;RT1-N3;Syk	rno05203
rno05204	Chemical carcinogenesis	Human Diseases	Cancer: overview	10	795	85	7679	0.38441	0.801769	1.13637	Adh7;Aldh1a3;Cyp1b1;Gsta2;Gsta3;Gsta5;Gstm1;Gstp1;Ptgs2;Ugt2b7	rno05204
rno05205	Proteoglycans in cancer	Human Diseases	Cancer: overview	28	795	198	7679	0.0535292	0.19247	1.36594	Camk2b;Cav3;Cd44;Fas;Flnc;Fn1;Hbegf;Hcls1;Hspg2;Igf1;Itga2;Itga5;Itgav;Itgb1;Met;Mmp2;Mmp9;Msn;Pak1;Plau;Plaur;Ptpn6;Rras2;Tgfb1;Tgfb2;Thbs1;Tlr2;Wnt9b	rno05205
rno05206	MicroRNAs in cancer	Human Diseases	Cancer: overview	24	795	141	7679	0.00962928	0.0468625	1.64411	Abcb1b;Bak1;Brca1;Ccne1;Cd44;Cdc25c;Cdca5;Cyp1b1;E2f1;E2f3;Hmga2;Hmox1;Itga5;Kif23;Met;Mmp9;Pdgfrb;Plau;Ptgs2;Tgfb2;Thbs1;Tnc;Tnn;Vim	rno05206
rno05210	Colorectal cancer	Human Diseases	Cancer: specific types	12	795	86	7679	0.175381	0.469391	1.34778	Areg;Bak1;Birc5;Ereg;Gadd45b;Gadd45g;Mapk10;Pmaip1;Rac2;Tgfb1;Tgfb2;Tgfb3	rno05210
rno05211	Renal cell carcinoma	Human Diseases	Cancer: specific types	7	795	66	7679	0.532582	0.936831	1.02445	Arnt2;Met;Pak1;Slc2a1;Tgfb1;Tgfb2;Tgfb3	rno05211
rno05212	Pancreatic cancer	Human Diseases	Cancer: specific types	11	795	74	7679	0.139118	0.398259	1.43582	Bak1;E2f1;E2f3;Gadd45b;Gadd45g;Mapk10;Rac2;Rad51;Tgfb1;Tgfb2;Tgfb3	rno05212
rno05213	Endometrial cancer	Human Diseases	Cancer: specific types	3	795	57	7679	0.943753	1	0.508375	Bak1;Gadd45b;Gadd45g	rno05213
rno05214	Glioma	Human Diseases	Cancer: specific types	8	795	71	7679	0.456318	0.875505	1.08835	Bak1;Camk2b;E2f1;E2f3;Gadd45b;Gadd45g;Igf1;Pdgfrb	rno05214
rno05215	Prostate cancer	Human Diseases	Cancer: specific types	13	795	96	7679	0.19054	0.496765	1.30801	Ccne1;Creb3l4;E2f1;E2f3;Erg;Gstp1;Igf1;Il1r2;Insrr;Mmp9;Pdgfrb;Plat;Plau	rno05215
rno05216	Thyroid cancer	Human Diseases	Cancer: specific types	7	795	37	7679	0.0818792	0.268638	1.8274	Bak1;Gadd45b;Gadd45g;Pax8;Ret;Tfg;Tpm3	rno05216
rno05217	Basal cell carcinoma	Human Diseases	Cancer: specific types	4	795	60	7679	0.881374	1	0.643941	Bak1;Gadd45b;Gadd45g;Wnt9b	rno05217
rno05218	Melanoma	Human Diseases	Cancer: specific types	10	795	72	7679	0.20755	0.526996	1.34154	Bak1;E2f1;E2f3;Fgf18;Fgf9;Gadd45b;Gadd45g;Igf1;Met;Pdgfrb	rno05218
rno05219	Bladder cancer	Human Diseases	Cancer: specific types	6	795	40	7679	0.228927	0.561737	1.44887	E2f1;E2f3;Hbegf;Mmp2;Mmp9;Thbs1	rno05219
rno05220	Chronic myeloid leukemia	Human Diseases	Cancer: specific types	8	795	77	7679	0.551225	0.939305	1.00354	Bak1;E2f1;E2f3;Gadd45b;Gadd45g;Tgfb1;Tgfb2;Tgfb3	rno05220
rno05221	Acute myeloid leukemia	Human Diseases	Cancer: specific types	7	795	66	7679	0.532582	0.936831	1.02445	Bcl2a1;Cd14;Cebpe;Csf1r;Fcgr1a;Itgam;Spi1	rno05221
rno05222	Small cell lung cancer	Human Diseases	Cancer: specific types	19	795	91	7679	0.00210128	0.013635	2.01674	Bak1;Ccne1;Cdkn2b;Cks1b;Cks2;Col4a1;Col4a2;E2f1;E2f3;Fn1;Gadd45b;Gadd45g;Itga2;Itgav;Itgb1;Lamb1;Lamc1;Nos2;Ptgs2	rno05222
rno05223	Non-small cell lung cancer	Human Diseases	Cancer: specific types	6	795	66	7679	0.691939	1	0.878102	Bak1;E2f1;E2f3;Gadd45b;Gadd45g;Jak3	rno05223
rno05224	Breast cancer	Human Diseases	Cancer: specific types	13	795	145	7679	0.749381	1	0.86599	Bak1;Brca1;E2f1;E2f3;Fgf18;Fgf9;Gadd45b;Gadd45g;Heyl;Igf1;Peg12;Pgr;Wnt9b	rno05224
rno05225	Hepatocellular carcinoma	Human Diseases	Cancer: specific types	19	795	169	7679	0.387342	0.802154	1.08594	Bak1;E2f1;E2f3;Gadd45b;Gadd45g;Gsta2;Gsta3;Gsta5;Gstm1;Gstp1;Hmox1;Met;Nqo1;Peg12;Tgfb1;Tgfb2;Tgfb3;Txnrd1;Wnt9b	rno05225
rno05226	Gastric cancer	Human Diseases	Cancer: specific types	16	795	147	7679	0.455584	0.875505	1.05133	Abcb1b;Bak1;Ccne1;Cdkn2b;E2f1;E2f3;Fgf18;Fgf9;Gadd45b;Gadd45g;Met;Peg12;Tgfb1;Tgfb2;Tgfb3;Wnt9b	rno05226
rno05230	Central carbon metabolism in cancer	Human Diseases	Cancer: overview	9	795	61	7679	0.175372	0.469391	1.42512	G6pd;Hk3;Ldha;Met;Pdgfrb;Ret;Slc16a3;Slc2a1;Slc7a5	rno05230
rno05231	Choline metabolism in cancer	Human Diseases	Cancer: overview	8	795	97	7679	0.799965	1	0.796628	Mapk10;Pcyt1b;Pdgfrb;Pla2g4f;Plpp1;Rac2;Slc5a7;Was	rno05231
rno05310	Asthma	Human Diseases	Immune disease	9	795	24	7679	0.000405969	0.00363733	3.62217	Cd40;Fcer1a;Fcer1g;Il10;RT1-Bb;RT1-Da;RT1-Db1;RT1-DMb;RT1-DOb	rno05310
rno05320	Autoimmune thyroid disease	Human Diseases	Immune disease	13	795	60	7679	0.00734075	0.0376052	2.09281	Cd40;Cd80;Ctla4;Fas;Il10;RT1-Bb;RT1-CE3;RT1-Da;RT1-Db1;RT1-DMb;RT1-DOb;RT1-N3;Tg	rno05320
rno05321	Inflammatiory bowel disease (IBD)	Human Diseases	Immune disease	19	795	59	7679	3.94126e-06	6.3936e-05	3.11056	Il10;Il17f;Il18;Il18rap;Il1a;Il1b;Il21r;Il2rg;Il6;RT1-Bb;RT1-Da;RT1-Db1;RT1-DMb;RT1-DOb;Tbx21;Tgfb1;Tgfb2;Tgfb3;Tlr2	rno05321
rno05322	Systemic lupus erythematosus	Human Diseases	Immune disease	40	795	91	7679	9.8355e-17	2.87197e-14	4.24577	Actn1;C1qa;C1qb;C1qc;C2;C3;Cd40;Cd80;Fcgr1a;Fcgr3a;H2afx;H2afy2;Hist1h2ac;Hist1h2ah;Hist1h2ai;Hist1h2ail1;Hist1h2ak;Hist1h2an;Hist1h2ao;Hist1h2ba;Hist1h2bcl1;Hist1h2bd;Hist1h2bf;Hist1h2bh;Hist1h2bk;Hist1h2bl;Hist1h2bo;Hist1h3a;Hist2h2aa3;Hist2h2ac;Hist2h3c2;Hist2h4;Hist2h4a;Hist3h2bb;Il10;RT1-Bb;RT1-Da;RT1-Db1;RT1-DMb;RT1-DOb	rno05322
rno05323	Rheumatoid arthritis	Human Diseases	Immune disease	25	795	81	7679	3.01062e-07	6.76233e-06	2.98121	Atp6v1e2;Ccl12;Ccl2;Ccl5;Cd80;Ctla4;Ctsk;Cxcl6;Icam1;Il11;Il18;Il1a;Il1b;Il6;Itgal;Itgb2;RT1-Bb;RT1-Da;RT1-Db1;RT1-DMb;RT1-DOb;Tgfb1;Tgfb2;Tgfb3;Tlr2	rno05323
rno05330	Allograft rejection	Human Diseases	Immune disease	11	795	53	7679	0.0179947	0.0784248	2.00472	Cd40;Cd80;Fas;Il10;RT1-Bb;RT1-CE3;RT1-Da;RT1-Db1;RT1-DMb;RT1-DOb;RT1-N3	rno05330
rno05332	Graft-versus-host disease	Human Diseases	Immune disease	12	795	51	7679	0.00492701	0.0266424	2.27273	Cd80;Fas;Il1a;Il1b;Il6;RT1-Bb;RT1-CE3;RT1-Da;RT1-Db1;RT1-DMb;RT1-DOb;RT1-N3	rno05332
rno05340	Primary immunodeficiency	Human Diseases	Immune disease	10	795	36	7679	0.00277345	0.0161969	2.68309	Btk;Cd3e;Cd40;Cd8b;Ciita;Icos;Il2rg;Jak3;Lck;Ptprc	rno05340
rno05410	Hypertrophic cardiomyopathy (HCM)	Human Diseases	Cardiovascular disease	18	795	86	7679	0.00264604	0.0160968	2.02168	Des;Edn1;Igf1;Il6;Itga10;Itga2;Itga4;Itga5;Itga8;Itgav;Itgb1;Sgcg;Tgfb1;Tgfb2;Tgfb3;Tnnc1;Tpm3;Tpm4	rno05410
rno05412	Arrhythmogenic right ventricular cardiomyopathy (ARVC)	Human Diseases	Cardiovascular disease	11	795	72	7679	0.120878	0.356588	1.4757	Actn2;Des;Gja1;Itga10;Itga2;Itga4;Itga5;Itga8;Itgav;Itgb1;Sgcg	rno05412
rno05414	Dilated cardiomyopathy (DCM)	Human Diseases	Cardiovascular disease	18	795	88	7679	0.00344251	0.0197101	1.97573	Adcy2;Adcy7;Des;Igf1;Itga10;Itga2;Itga4;Itga5;Itga8;Itgav;Itgb1;Sgcg;Tgfb1;Tgfb2;Tgfb3;Tnnc1;Tpm3;Tpm4	rno05414
rno05416	Viral myocarditis	Human Diseases	Cardiovascular disease	16	795	73	7679	0.00274672	0.0161969	2.11707	Cd40;Cd55;Cd80;Cxadr;Icam1;Itgal;Itgb2;Rac2;RT1-Bb;RT1-CE3;RT1-Da;RT1-Db1;RT1-DMb;RT1-DOb;RT1-N3;Sgcg	rno05416
rno05418	Fluid shear stress and atherosclerosis	Human Diseases	Cardiovascular disease	26	795	141	7679	0.00239375	0.0151951	1.78111	Bmpr1b;Cav3;Ccl12;Ccl2;Edn1;Gsta2;Gsta3;Gsta5;Gstm1;Gstp1;Hmox1;Icam1;Il1a;Il1b;Il1r1;Il1r2;Itgav;Mapk10;Mmp2;Mmp9;Ncf1;Ncf2;Nqo1;Plat;Rac2;Txn1	rno05418

## Sheet: up-regulated (SSCI–2 vs. sham)
id	Term	Classification_level1	Classification_level2	ListHits	ListTotal	PopHits	PopTotal	p-value	q-value	Enrichment_score	Gene	hyperlink_only_excel
rno00010	Glycolysis / Gluconeogenesis	Metabolism	Carbohydrate metabolism	6	893	64	7679	0.770119	1	0.806166	Aldh1a3;Eno1;Hk2;Hk3;Ldha;Pgk1	rno00010
rno00020	Citrate cycle (TCA cycle)	Metabolism	Carbohydrate metabolism	2	893	31	7679	0.890485	1	0.554781	Idh1;Pc	rno00020
rno00030	Pentose phosphate pathway	Metabolism	Carbohydrate metabolism	5	893	29	7679	0.242772	0.599668	1.4826	G6pd;H6pd;Pgd;Taldo1;Tkt	rno00030
rno00040	Pentose and glucuronate interconversions	Metabolism	Carbohydrate metabolism	6	893	33	7679	0.178378	0.464425	1.56347	Akr1b8;RGD1559459;Sord;Ugdh;Ugt1a7c;Ugt2b7	rno00040
rno00051	Fructose and mannose metabolism	Metabolism	Carbohydrate metabolism	5	893	34	7679	0.361256	0.751101	1.26457	Akr1b8;Hk2;Hk3;Pfkfb3;Sord	rno00051
rno00052	Galactose metabolism	Metabolism	Carbohydrate metabolism	4	893	30	7679	0.467579	0.906916	1.14655	Akr1b8;Gale;Hk2;Hk3	rno00052
rno00053	Ascorbate and aldarate metabolism	Metabolism	Carbohydrate metabolism	4	893	26	7679	0.358065	0.751101	1.32294	RGD1559459;Ugdh;Ugt1a7c;Ugt2b7	rno00053
rno00072	Synthesis and degradation of ketone bodies	Metabolism	Lipid metabolism	2	893	10	7679	0.327314	0.705923	1.71982	Bdh1;Hmgcs1	rno00072
rno00100	Steroid biosynthesis	Metabolism	Lipid metabolism	2	893	19	7679	0.666168	1	0.905169	Cyp51;Sqle	rno00100
rno00120	Primary bile acid biosynthesis	Metabolism	Lipid metabolism	1	893	16	7679	0.861945	1	0.537444	Cyp7b1	rno00120
rno00130	Ubiquinone and other terpenoid-quinone biosynthesis	Metabolism	Metabolism of cofactors and vitamins	1	893	11	7679	0.743557	1	0.781737	Nqo1	rno00130
rno00140	Steroid hormone biosynthesis	Metabolism	Lipid metabolism	9	893	75	7679	0.513659	0.938989	1.03189	Cyp11b2;Cyp1b1;Cyp2c11;Cyp2d1;Cyp7b1;RGD1559459;Sult2b1;Ugt1a7c;Ugt2b7	rno00140
rno00190	Oxidative phosphorylation	Metabolism	Energy metabolism	1	893	119	7679	1	1	0.0722614	Ndufa4l2	rno00190
rno00220	Arginine biosynthesis	Metabolism	Amino acid metabolism	2	893	19	7679	0.666168	1	0.905169	Ass1;Nos2	rno00220
rno00230	Purine metabolism	Metabolism	Nucleotide metabolism	16	893	169	7679	0.84364	1	0.814116	Adcy7;Adcy8;Ampd3;Dck;Entpd5;Entpd8;Gucy2f;Hprt1;Impdh1;Pde4c;Pola2;Pole;Pole2;Polr2i;Prim1;Rrm2	rno00230
rno00240	Pyrimidine metabolism	Metabolism	Nucleotide metabolism	12	893	96	7679	0.441431	0.892124	1.07489	Dck;Dctpp1;Entpd5;Entpd8;Pola2;Pole;Pole2;Polr2i;Prim1;Rrm2;Tk1;Upp1	rno00240
rno00250	Alanine, aspartate and glutamate metabolism	Metabolism	Amino acid metabolism	2	893	35	7679	0.926411	1	0.491377	Ass1;Gfpt1	rno00250
rno00260	Glycine, serine and threonine metabolism	Metabolism	Amino acid metabolism	5	893	38	7679	0.457505	0.90048	1.13146	Alas1;Chdh;Gatm;Phgdh;Psat1	rno00260
rno00270	Cysteine and methionine metabolism	Metabolism	Amino acid metabolism	4	893	45	7679	0.784438	1	0.764365	Bcat1;Dnmt3b;Ldha;Mat1a	rno00270
rno00280	Valine, leucine and isoleucine degradation	Metabolism	Amino acid metabolism	3	893	53	7679	0.955089	1	0.486742	Aox2;Bcat1;Hmgcs1	rno00280
rno00310	Lysine degradation	Metabolism	Amino acid metabolism	1	893	54	7679	0.99877	1	0.159243	Suv39h2	rno00310
rno00330	Arginine and proline metabolism	Metabolism	Amino acid metabolism	6	893	48	7679	0.49144	0.935467	1.07489	Aoc1;Gatm;Nos2;P4ha3;Prodh2;Sat1	rno00330
rno00340	Histidine metabolism	Metabolism	Amino acid metabolism	4	893	23	7679	0.275308	0.641646	1.4955	Aldh1a3;Aoc1;Ftcd;Hdc	rno00340
rno00350	Tyrosine metabolism	Metabolism	Amino acid metabolism	2	893	38	7679	0.945716	1	0.452584	Aldh1a3;Aox2	rno00350
rno00360	Phenylalanine metabolism	Metabolism	Amino acid metabolism	1	893	20	7679	0.915906	1	0.429955	Aldh1a3	rno00360
rno00380	Tryptophan metabolism	Metabolism	Amino acid metabolism	8	893	45	7679	0.145382	0.408365	1.52873	Aoc1;Aox2;Cyp1b1;Ido1;Ido2;Kmo;Kynu;Tph1	rno00380
rno00410	beta-Alanine metabolism	Metabolism	Metabolism of other amino acids	1	893	30	7679	0.975676	1	0.286637	Aldh1a3	rno00410
rno00430	Taurine and hypotaurine metabolism	Metabolism	Metabolism of other amino acids	2	893	11	7679	0.371797	0.767496	1.56347	Ggt1;Ggt7	rno00430
rno00440	Phosphonate and phosphinate metabolism	Metabolism	Metabolism of other amino acids	1	893	5	7679	0.461146	0.90048	1.71982	Pcyt1b	rno00440
rno00450	Selenocompound metabolism	Metabolism	Metabolism of other amino acids	1	893	17	7679	0.878033	1	0.50583	Txnrd1	rno00450
rno00480	Glutathione metabolism	Metabolism	Metabolism of other amino acids	15	893	58	7679	0.00204535	0.0100187	2.22391	G6pd;Ggt1;Ggt7;Gpx2;Gsr;Gsta2;Gsta3;Gsta4;Gsta5;Gstm1;Gstp1;Idh1;Mgst3;Pgd;Rrm2	rno00480
rno00500	Starch and sucrose metabolism	Metabolism	Carbohydrate metabolism	2	893	29	7679	0.866934	1	0.593042	Hk2;Hk3	rno00500
rno00510	N-Glycan biosynthesis	Metabolism	Glycan biosynthesis and metabolism	2	893	48	7679	0.980887	1	0.358296	Alg5;St6gal1	rno00510
rno00512	Mucin type O-glycan biosynthesis	Metabolism	Glycan biosynthesis and metabolism	8	893	27	7679	0.00951397	0.0392791	2.54788	B3gnt6;C1galt1;Galnt12;Galnt14;Galnt3;Galnt6;Gcnt3;St6galnac1	rno00512
rno00514	Other types of O-glycan biosynthesis	Metabolism	Glycan biosynthesis and metabolism	1	893	22	7679	0.934373	1	0.390868	St6gal1	rno00514
rno00520	Amino sugar and nucleotide sugar metabolism	Metabolism	Carbohydrate metabolism	5	893	47	7679	0.652127	1	0.914798	Gale;Gfpt1;Hk2;Hk3;Ugdh	rno00520
rno00531	Glycosaminoglycan degradation	Metabolism	Glycan biosynthesis and metabolism	2	893	20	7679	0.693957	1	0.85991	Hpse;Hyal4	rno00531
rno00532	Glycosaminoglycan biosynthesis - chondroitin sulfate / dermatan sulfate	Metabolism	Glycan biosynthesis and metabolism	2	893	21	7679	0.719806	1	0.818962	Chst11;Chst13	rno00532
rno00534	Glycosaminoglycan biosynthesis - heparan sulfate / heparin	Metabolism	Glycan biosynthesis and metabolism	3	893	25	7679	0.56903	0.997148	1.03189	Hs3st5;Hs6st1;Hs6st2	rno00534
rno00561	Glycerolipid metabolism	Metabolism	Lipid metabolism	5	893	61	7679	0.852851	1	0.704845	Akr1b8;Gk;Lipg;Mogat1;Plpp4	rno00561
rno00562	Inositol phosphate metabolism	Metabolism	Carbohydrate metabolism	2	893	73	7679	0.998768	1	0.235592	Inpp5d;Pik3cb	rno00562
rno00564	Glycerophospholipid metabolism	Metabolism	Lipid metabolism	8	893	96	7679	0.88386	1	0.716592	Gpd2;Lpcat4;Pcyt1b;Pgs1;Pla2g2d;Pla2g2f;Pla2g4f;Plpp4	rno00564
rno00565	Ether lipid metabolism	Metabolism	Lipid metabolism	6	893	45	7679	0.427313	0.869672	1.14655	Enpp6;Lpcat4;Pla2g2d;Pla2g2f;Pla2g4f;Pla2g7	rno00565
rno00590	Arachidonic acid metabolism	Metabolism	Lipid metabolism	8	893	77	7679	0.686281	1	0.893413	Alox12e;Alox15;Cyp2c11;Ggt1;Gpx2;Pla2g2d;Pla2g2f;Pla2g4f	rno00590
rno00591	Linoleic acid metabolism	Metabolism	Lipid metabolism	5	893	39	7679	0.481031	0.926786	1.10245	Alox15;Cyp2c11;Pla2g2d;Pla2g2f;Pla2g4f	rno00591
rno00592	alpha-Linolenic acid metabolism	Metabolism	Lipid metabolism	3	893	23	7679	0.510669	0.938989	1.12162	Pla2g2d;Pla2g2f;Pla2g4f	rno00592
rno00600	Sphingolipid metabolism	Metabolism	Lipid metabolism	4	893	49	7679	0.837558	1	0.701968	Degs2;Sgms2;Sphk1;Ugcg	rno00600
rno00601	Glycosphingolipid biosynthesis - lacto and neolacto series	Metabolism	Glycan biosynthesis and metabolism	6	893	29	7679	0.112683	0.335725	1.77912	Abo;B3galnt1;B3gnt3;B3gnt5;Fut1;St8sia1	rno00601
rno00603	Glycosphingolipid biosynthesis - globo and isoglobo series	Metabolism	Glycan biosynthesis and metabolism	3	893	15	7679	0.249704	0.606424	1.71982	B3galnt1;Fut1;St8sia1	rno00603
rno00604	Glycosphingolipid biosynthesis - ganglio series	Metabolism	Glycan biosynthesis and metabolism	2	893	15	7679	0.53465	0.953789	1.14655	B4galnt1;St8sia1	rno00604
rno00620	Pyruvate metabolism	Metabolism	Carbohydrate metabolism	2	893	39	7679	0.951002	1	0.44098	Ldha;Pc	rno00620
rno00640	Propanoate metabolism	Metabolism	Carbohydrate metabolism	1	893	31	7679	0.978516	1	0.27739	Ldha	rno00640
rno00650	Butanoate metabolism	Metabolism	Carbohydrate metabolism	2	893	25	7679	0.805412	1	0.687928	Bdh1;Hmgcs1	rno00650
rno00670	One carbon pool by folate	Metabolism	Metabolism of cofactors and vitamins	4	893	18	7679	0.148698	0.409275	1.91091	Dhfr;Ftcd;Mthfd1l;Mthfd2	rno00670
rno00730	Thiamine metabolism	Metabolism	Metabolism of cofactors and vitamins	1	893	15	7679	0.843737	1	0.573274	Alpl	rno00730
rno00740	Riboflavin metabolism	Metabolism	Metabolism of cofactors and vitamins	1	893	8	7679	0.628238	1	1.07489	Acp5	rno00740
rno00750	Vitamin B6 metabolism	Metabolism	Metabolism of cofactors and vitamins	2	893	10	7679	0.327314	0.705923	1.71982	Aox2;Psat1	rno00750
rno00760	Nicotinate and nicotinamide metabolism	Metabolism	Metabolism of cofactors and vitamins	4	893	32	7679	0.519856	0.938989	1.07489	Aox2;Bst1;Cd38;Qprt	rno00760
rno00770	Pantothenate and CoA biosynthesis	Metabolism	Metabolism of cofactors and vitamins	2	893	19	7679	0.666168	1	0.905169	Bcat1;Vnn3	rno00770
rno00790	Folate biosynthesis	Metabolism	Metabolism of cofactors and vitamins	7	893	26	7679	0.0253837	0.0940499	2.31514	Akr1b8;Alpl;Dhfr;Gch1;Ggh;Mocos;Tph1	rno00790
rno00830	Retinol metabolism	Metabolism	Metabolism of cofactors and vitamins	7	893	80	7679	0.837368	1	0.752422	Aldh1a7;Aox2;Cyp2c11;Rdh12;RGD1559459;Ugt1a7c;Ugt2b7	rno00830
rno00860	Porphyrin and chlorophyll metabolism	Metabolism	Metabolism of cofactors and vitamins	6	893	40	7679	0.318861	0.705113	1.28987	Alas1;Cpox;Hmox1;RGD1559459;Ugt1a7c;Ugt2b7	rno00860
rno00900	Terpenoid backbone biosynthesis	Metabolism	Metabolism of terpenoids and polyketides	3	893	23	7679	0.510669	0.938989	1.12162	Hmgcs1;Idi1;Mvd	rno00900
rno00910	Nitrogen metabolism	Metabolism	Energy metabolism	4	893	17	7679	0.126672	0.369781	2.02332	Car13;Car2;Car4;Car8	rno00910
rno00920	Sulfur metabolism	Metabolism	Energy metabolism	1	893	12	7679	0.773422	1	0.716592	Ethe1	rno00920
rno00980	Metabolism of xenobiotics by cytochrome P450	Metabolism	Xenobiotics biodegradation and metabolism	13	893	64	7679	0.0305227	0.111659	1.74669	Akr7a3;Aldh1a3;Cyp1b1;Gsta2;Gsta3;Gsta4;Gsta5;Gstm1;Gstp1;Mgst3;RGD1559459;Ugt1a7c;Ugt2b7	rno00980
rno00982	Drug metabolism - cytochrome P450	Metabolism	Xenobiotics biodegradation and metabolism	12	893	65	7679	0.0691906	0.231748	1.58753	Aldh1a3;Aox2;Gsta2;Gsta3;Gsta4;Gsta5;Gstm1;Gstp1;Mgst3;RGD1559459;Ugt1a7c;Ugt2b7	rno00982
rno00983	Drug metabolism - other enzymes	Metabolism	Xenobiotics biodegradation and metabolism	17	893	83	7679	0.0135465	0.0521992	1.76126	Ces2;Ces2h;Gsta2;Gsta3;Gsta4;Gsta5;Gstm1;Gstp1;Hprt1;Impdh1;Mgst3;RGD1559459;Rrm2;Tk1;Ugt1a7c;Ugt2b7;Upp1	rno00983
rno01521	EGFR tyrosine kinase inhibitor resistance	Human Diseases	Drug resistance: antineoplastic	8	893	79	7679	0.714039	1	0.870795	Igf1;Il6;Met;Nrg1;Pik3cb;Pik3r3;Tgfa;Vegfa	rno01521
rno01522	Endocrine resistance	Human Diseases	Drug resistance: antineoplastic	9	893	93	7679	0.768987	1	0.832171	Adcy7;Adcy8;E2f1;Hbegf;Igf1;Mmp2;Mmp9;Pik3cb;Pik3r3	rno01522
rno01523	Antifolate resistance	Human Diseases	Drug resistance: antineoplastic	10	893	30	7679	0.00145459	0.00737503	2.86637	Abcc3;Abcc4;Alox12e;Dhfr;Ggh;Il1b;Il6;Izumo1r;Nfkb1;Tnf	rno01523
rno01524	Platinum drug resistance	Human Diseases	Drug resistance: antineoplastic	18	893	76	7679	0.00225637	0.0107175	2.03663	Bak1;Birc3;Birc5;Brca1;Casp3;Casp8;Faslg;Gsta2;Gsta3;Gsta4;Gsta5;Gstm1;Gstp1;Mgst3;Pik3cb;Pik3r3;Pmaip1;Top2a	rno01524
rno02010	ABC transporters	Environmental Information Processing	Membrane transport	7	893	47	7679	0.302699	0.683437	1.28072	Abca17;Abcb1b;Abcc3;Abcc4;Abcd3;Tap1;Tap2	rno02010
rno03008	Ribosome biogenesis in eukaryotes	Genetic Information Processing	Translation	2	893	78	7679	0.999299	1	0.22049	Nhp2;Rpp25	rno03008
rno03013	RNA transport	Genetic Information Processing	Translation	3	893	160	7679	0.999999	1	0.161233	Nup210;Rpp25;Tacc3	rno03013
rno03018	RNA degradation	Genetic Information Processing	Folding, sorting and degradation	2	893	80	7679	0.999441	1	0.214978	Btg1;Eno1	rno03018
rno03020	RNA polymerase	Genetic Information Processing	Transcription	1	893	28	7679	0.968823	1	0.307111	Polr2i	rno03020
rno03030	DNA replication	Genetic Information Processing	Replication and repair	9	893	34	7679	0.013293	0.0519144	2.27623	Fen1;Mcm3;Mcm4;Mcm5;Mcm6;Pola2;Pole;Pole2;Prim1	rno03030
rno03050	Proteasome	Genetic Information Processing	Folding, sorting and degradation	5	893	44	7679	0.592185	1	0.977171	Ifng;Pomp;Psmb10;Psmb8;Psmb9	rno03050
rno03320	PPAR signaling pathway	Organismal Systems	Endocrine system	8	893	79	7679	0.714039	1	0.870795	Angptl4;Apoc3;Dbi;Fabp4;Fabp5;Gk;Olr1;Plin2	rno03320
rno03410	Base excision repair	Genetic Information Processing	Replication and repair	5	893	35	7679	0.385481	0.790099	1.22844	Fen1;Neil3;Pole;Pole2;Ung	rno03410
rno03420	Nucleotide excision repair	Genetic Information Processing	Replication and repair	2	893	44	7679	0.970841	1	0.390868	Pole;Pole2	rno03420
rno03430	Mismatch repair	Genetic Information Processing	Replication and repair	1	893	22	7679	0.934373	1	0.390868	Exo1	rno03430
rno03440	Homologous recombination	Genetic Information Processing	Replication and repair	9	893	39	7679	0.031731	0.114406	1.98441	Bard1;Brca1;Brip1;Eme1;Palb2;Rad51;Rad51b;Rad54b;Rad54l	rno03440
rno03450	Non-homologous end-joining	Genetic Information Processing	Replication and repair	2	893	13	7679	0.456738	0.90048	1.32294	Dntt;Fen1	rno03450
rno03460	Fanconi anemia pathway	Genetic Information Processing	Replication and repair	9	893	49	7679	0.10915	0.328588	1.57943	Brca1;Brip1;Eme1;Fancd2;Fanci;Palb2;Rad51;Rmi2;Ube2t	rno03460
rno04010	MAPK signaling pathway	Environmental Information Processing	Signal transduction	40	893	288	7679	0.131145	0.379009	1.19432	Angpt4;Areg;Bdnf;Cacna1e;Cacng7;Casp3;Cd14;Dusp10;Dusp2;Dusp4;Dusp5;Ereg;Faslg;Fgf9;Flt3;Gadd45b;Igf1;Il1a;Il1b;Kit;Map4k1;Met;Myd88;Nfkb1;Nfkb2;Ntf4;Ntrk1;Pla2g4f;Ptpn5;Ptpn7;Rac2;Rasgrf1;Rasgrp1;Rasgrp4;Relb;Rps6ka1;Tgfa;Tgfb1;Tnf;Vegfa	rno04010
rno04012	ErbB signaling pathway	Environmental Information Processing	Signal transduction	8	893	85	7679	0.787246	1	0.809327	Areg;Camk2b;Ereg;Hbegf;Nrg1;Pik3cb;Pik3r3;Tgfa	rno04012
rno04014	Ras signaling pathway	Environmental Information Processing	Signal transduction	29	893	227	7679	0.322059	0.705113	1.09856	Angpt4;Bdnf;Faslg;Fgf9;Flt3;Gng4;Gngt2;Htr7;Igf1;Kit;Lat;Met;Nfkb1;Ntf4;Ntrk1;Pik3cb;Pik3r3;Pla2g2d;Pla2g2f;Pla2g4f;Rac2;Rasal3;Rasgrf1;Rasgrp1;Rasgrp4;Rin1;Tgfa;Vegfa;Zap70	rno04014
rno04015	Rap1 signaling pathway	Environmental Information Processing	Signal transduction	23	893	205	7679	0.606805	1	0.964778	Adcy7;Adcy8;Adora2a;Angpt4;F2r;Fgf9;Fpr1;Fyb;Igf1;Itgal;Itgam;Itgb2;Kit;Lat;Met;Pfn2;Pik3cb;Pik3r3;Rac2;Rgs14;Skap1;Thbs1;Vegfa	rno04015
rno04020	Calcium signaling pathway	Environmental Information Processing	Signal transduction	24	893	182	7679	0.2856	0.660308	1.13395	Adcy7;Adcy8;Adora2a;Adra1d;Bdkrb1;Cacna1e;Camk2b;Cd38;Cysltr2;Drd1;Ednra;Ednrb;F2r;Gna15;Grpr;Htr7;Ltb4r2;Nos2;Orai2;P2rx4;P2rx5;Ptafr;Ptgfr;Sphk1	rno04020
rno04022	cGMP - PKG signaling pathway	Environmental Information Processing	Signal transduction	12	893	164	7679	0.974946	1	0.629203	Adcy7;Adcy8;Adora1;Adra1d;Atp1a3;Atp1b1;Atp1b3;Creb3l4;Ednra;Ednrb;Pik3r5;Prkg2	rno04022
rno04024	cAMP signaling pathway	Environmental Information Processing	Signal transduction	25	893	194	7679	0.322042	0.705113	1.10813	Abcc4;Adcy7;Adcy8;Adora1;Adora2a;Atp1a3;Atp1b1;Atp1b3;Bdnf;Camk2b;Creb3l4;Drd1;Ednra;F2r;Ffar2;Nfkb1;Nfkbia;Niacr1;Pde4c;Pik3cb;Pik3r3;Ppp1r1b;Ptger2;Rac2;Vav1	rno04024
rno04060	Cytokine-cytokine receptor interaction	Environmental Information Processing	Signaling molecules and interaction	101	893	240	7679	2.25614e-34	6.52024e-32	3.61879	Bmpr1b;Ccl12;Ccl17;Ccl2;Ccl20;Ccl22;Ccl3;Ccl4;Ccl5;Ccl6;Ccl7;Ccl9;Ccr1l1;Ccr3;Ccr4;Ccr5;Ccr6;Ccr7;Ccr8;Ccr9;Cd27;Cd40;Cd40lg;Csf2;Csf2ra;Csf2rb;Csf3;Csf3r;Cx3cl1;Cx3cr1;Cxcl1;Cxcl10;Cxcl11;Cxcl13;Cxcl2;Cxcl3;Cxcl6;Cxcl9;Cxcr2;Cxcr3;Cxcr4;Cxcr6;Faslg;Flt3;Ifng;Ifngr1;Il10;Il11;Il12b;Il12rb1;Il15ra;Il17a;Il17b;Il17c;Il17f;Il17ra;Il18;Il18rap;Il19;Il1a;Il1b;Il1r2;Il20ra;Il21r;Il22;Il22ra1;Il22ra2;Il…	rno04060
rno04062	Chemokine signaling pathway	Organismal Systems	Immune system	54	893	172	7679	2.07846e-12	6.00675e-11	2.69972	Adcy7;Adcy8;Ccl12;Ccl17;Ccl2;Ccl20;Ccl22;Ccl3;Ccl4;Ccl5;Ccl6;Ccl7;Ccl9;Ccr1l1;Ccr3;Ccr4;Ccr5;Ccr6;Ccr7;Ccr8;Ccr9;Cx3cl1;Cx3cr1;Cxcl1;Cxcl10;Cxcl11;Cxcl13;Cxcl2;Cxcl3;Cxcl6;Cxcl9;Cxcr2;Cxcr3;Cxcr4;Cxcr6;Dock2;Fgr;Gng4;Gngt2;Hck;Itk;Jak3;Lyn;Ncf1;Nfkb1;Nfkbia;Pik3cb;Pik3r3;Ppbp;Prex1;Rac2;Vav1;Was;Xcr1	rno04062
rno04064	NF-kappa B signaling pathway	Environmental Information Processing	Signal transduction	30	893	89	7679	2.94243e-08	3.40144e-07	2.89857	Bcl2a1;Birc3;Btk;Card11;Card14;Ccl4;Cd14;Cd40;Cd40lg;Cxcl2;Gadd45b;Icam1;Il1b;Lat;Lck;Ltb;Ly96;Lyn;Myd88;Nfkb1;Nfkb2;Nfkbia;Plau;Relb;Syk;Tnf;Tnfaip3;Tnfsf11;Tnfsf14;Zap70	rno04064
rno04066	HIF-1 signaling pathway	Environmental Information Processing	Signal transduction	24	893	99	7679	0.000313611	0.00174295	2.08463	Angpt4;Camk2b;Cybb;Eno1;Hif1a;Hk2;Hk3;Hmox1;Ifng;Ifngr1;Igf1;Il6;Ldha;Nfkb1;Nos2;Pfkfb3;Pgk1;Pik3cb;Pik3r3;Serpine1;Slc2a1;Tfrc;Timp1;Vegfa	rno04066
rno04068	FoxO signaling pathway	Environmental Information Processing	Signal transduction	16	893	130	7679	0.44462	0.892329	1.05835	Ccnb1;Ccnb2;Cdkn2b;Faslg;Gadd45b;Igf1;Il10;Il6;Pik3cb;Pik3r3;Plk1;Plk4;S1pr4;Sgk2;Sod2;Tgfb1	rno04068
rno04070	Phosphatidylinositol signaling system	Environmental Information Processing	Signal transduction	3	893	97	7679	0.999447	1	0.265952	Inpp5d;Pik3cb;Pik3r3	rno04070
rno04071	Sphingolipid signaling pathway	Environmental Information Processing	Signal transduction	13	893	119	7679	0.638493	1	0.939398	Adora1;Ctsd;Degs2;Fcer1g;Ms4a2;Nfkb1;Pik3cb;Pik3r3;Rac2;S1pr4;Sgms2;Sphk1;Tnf	rno04071
rno04072	Phospholipase D signaling pathway	Environmental Information Processing	Signal transduction	15	893	146	7679	0.73462	1	0.88347	Adcy7;Adcy8;Cxcr2;Cyth4;F2r;Fcer1g;Kit;Ms4a2;Pik3cb;Pik3r3;Pik3r5;Pla2g4f;Ptgfr;Sphk1;Syk	rno04072
rno04080	Neuroactive ligand-receptor interaction	Environmental Information Processing	Signaling molecules and interaction	45	893	313	7679	0.0752838	0.245309	1.23629	Adora1;Adora2a;Adra1d;Agtr2;Apln;Aplnr;Bdkrb1;C3ar1;C5ar1;Chrna3;Chrnb4;Cnr2;Cysltr2;Drd1;Ednra;Ednrb;F2r;F2rl1;F2rl2;Fpr1;Gabrp;Gabrr2;Glra1;Gpr35;Grid2;Grpr;Htr7;Ltb4r;Ltb4r2;Nmur1;Npy4r;P2rx4;P2rx5;P2ry10;P2ry13;P2ry6;Ptafr;Ptger2;Ptgfr;Ptgir;S1pr4;Sstr3;Taar1;Tac3;Trh	rno04080
rno04110	Cell cycle	Cellular Processes	Cell growth and death	29	893	123	7679	0.000131473	0.000759911	2.02743	Bub1;Bub1b;Ccna2;Ccnb1;Ccnb2;Ccne1;Cdc20;Cdc25c;Cdc45;Cdc6;Cdk1;Cdkn2b;Chek1;Dbf4;E2f1;Espl1;Gadd45b;Mad2l1;Mcm3;Mcm4;Mcm5;Mcm6;Pkmyt1;Plk1;Pttg1;Rbl1;Smc1b;Tgfb1;Ttk	rno04110
rno04114	Oocyte meiosis	Cellular Processes	Cell growth and death	22	893	112	7679	0.00900553	0.0377188	1.68911	Adcy7;Adcy8;Aurka;Bub1;Camk2b;Ccnb1;Ccnb2;Ccne1;Cdc20;Cdc25c;Cdk1;Espl1;Fbxo5;Igf1;Mad2l1;Pgr;Pkmyt1;Plk1;Pttg1;Rps6ka1;Sgo1;Smc1b	rno04114
rno04115	p53 signaling pathway	Cellular Processes	Cell growth and death	16	893	66	7679	0.00301884	0.0138483	2.08463	Casp3;Casp8;Ccnb1;Ccnb2;Ccne1;Cdk1;Chek1;Gadd45b;Gtse1;Igf1;Pmaip1;Rrm2;Serpinb5;Serpine1;Thbs1;Tp73	rno04115
rno04120	Ubiquitin mediated proteolysis	Genetic Information Processing	Folding, sorting and degradation	6	893	132	7679	0.998715	1	0.390868	Birc3;Brca1;Cdc20;Fbxo2;Socs3;Ube2c	rno04120
rno04137	Mitophagy - animal	Cellular Processes	Transport and catabolism	2	893	63	7679	0.996246	1	0.272987	E2f1;Hif1a	rno04137
rno04140	Autophagy - animal	Cellular Processes	Transport and catabolism	5	893	129	7679	0.999533	1	0.333299	Ctsd;Hif1a;Pik3cb;Pik3r3;Vmp1	rno04140
rno04141	Protein processing in endoplasmic reticulum	Genetic Information Processing	Folding, sorting and degradation	4	893	160	7679	0.999996	1	0.214978	Bak1;Casp12;Ckap4;Fbxo2	rno04141
rno04142	Lysosome	Cellular Processes	Transport and catabolism	11	893	125	7679	0.874737	1	0.756721	Acp5;Cd68;Ctsd;Ctsw;Ctsz;Laptm5;Lgmn;Litaf;Napsa;Slc11a1;Slc11a2	rno04142
rno04144	Endocytosis	Cellular Processes	Transport and catabolism	21	893	256	7679	0.971665	1	0.705395	Acap1;Arpc1b;Arpc3;Ccr5;Cxcr2;Cxcr4;Cyth4;Il2ra;Il2rb;Il2rg;Izumo1r;Kif5c;Ldlr;RT1-A1;RT1-A2;RT1-CE10;RT1-CE3;RT1-CE5;RT1-M2;Tfrc;Was	rno04144
rno04145	Phagosome	Cellular Processes	Transport and catabolism	42	893	169	7679	1.01681e-06	8.64292e-06	2.13706	C3;Cd14;Clec7a;Coro1a;Cyba;Cybb;Fcar;Fcgr1a;Fcgr2a;Fcgr3a;Itga2;Itga5;Itgam;Itgb2;Msr1;Ncf1;Ncf2;Ncf4;Olr1;RT1-A1;RT1-A2;RT1-Ba;RT1-Bb;RT1-CE10;RT1-CE3;RT1-CE5;RT1-Da;RT1-Db1;RT1-DMb;RT1-DOa;RT1-DOb;RT1-M2;Tap1;Tap2;Tfrc;Thbs1;Thbs4;Tlr2;Tlr6;Tubb2a;Tubb2b;Tubb3	rno04145
rno04146	Peroxisome	Cellular Processes	Transport and catabolism	5	893	81	7679	0.966591	1	0.530809	Abcd3;Idh1;Nos2;Prdx1;Sod2	rno04146
rno04150	mTOR signaling pathway	Environmental Information Processing	Signal transduction	7	893	150	7679	0.999147	1	0.401292	Fzd5;Igf1;Pik3cb;Pik3r3;Rps6ka1;Slc7a5;Tnf	rno04150
rno04151	PI3K-Akt signaling pathway	Environmental Information Processing	Signal transduction	55	893	335	7679	0.00466385	0.020422	1.41179	Angpt4;Areg;Bdnf;Brca1;Ccne1;Cd19;Col4a1;Col4a2;Col6a4;Creb3l4;Csf3;Csf3r;Ereg;F2r;Faslg;Fgf9;Flt3;Fn1;Gng4;Gngt2;Igf1;Il2ra;Il2rb;Il2rg;Il6;Il7;Itga2;Itga3;Itga4;Itga5;Itga8;Itgb7;Jak3;Kit;Lama1;Lamc2;Met;Nfkb1;Ntf4;Ntrk1;Osm;Osmr;Pik3cb;Pik3r3;Pik3r5;RGD1560020_predicted;Sgk2;Spp1;Syk;Tgfa;Thbs1;Thbs4;Tlr2;Tnn;Vegfa	rno04151
rno04152	AMPK signaling pathway	Environmental Information Processing	Signal transduction	6	893	123	7679	0.997159	1	0.419468	Ccna2;Creb3l4;Igf1;Pfkfb3;Pik3cb;Pik3r3	rno04152
rno04210	Apoptosis	Cellular Processes	Cell growth and death	26	893	134	7679	0.00565662	0.0243995	1.66848	Bak1;Bcl2a1;Birc3;Birc5;Casp12;Casp3;Casp8;Csf2rb;Ctsd;Ctsw;Ctsz;Faslg;Gadd45b;Gzmb;Gzmbl2;Lmnb1;Lmnb2;Nfkb1;Nfkbia;Ntrk1;Pik3cb;Pik3r3;Pmaip1;Prf1;Tnf;Tnfrsf10b	rno04210
rno04211	Longevity regulating pathway - mammal	Organismal Systems	Aging	8	893	89	7679	0.827739	1	0.772953	Adcy7;Adcy8;Creb3l4;Igf1;Nfkb1;Pik3cb;Pik3r3;Sod2	rno04211
rno04213	Longevity regulating pathway - multiple species	Organismal Systems	Aging	6	893	62	7679	0.742761	1	0.832171	Adcy7;Adcy8;Igf1;Pik3cb;Pik3r3;Sod2	rno04213
rno04215	Apoptosis - multiple species	Cellular Processes	Cell growth and death	6	893	32	7679	0.160688	0.423562	1.61233	Bak1;Birc3;Birc5;Casp3;Casp8;Pmaip1	rno04215
rno04216	Ferroptosis	Cellular Processes	Cell growth and death	7	893	39	7679	0.1608	0.423562	1.54343	Alox15;Cybb;Hmox1;Sat1;Slc11a2;Slc7a11;Tfrc	rno04216
rno04217	Necroptosis	Cellular Processes	Cell growth and death	27	893	145	7679	0.00855423	0.0363555	1.60121	Alox15;Birc3;Camk2b;Casp1;Casp8;Cybb;Faslg;H2afx;Hist1h2ac;Hist1h2ah;Hist1h2ai;Hist1h2ak;Hist1h2an;Ifng;Ifngr1;Il1a;Il1b;Jak3;Mlkl;Nlrp3;Pla2g4f;Ripk3;Stat4;Tnf;Tnfaip3;Tnfrsf10b;Zbp1	rno04217
rno04218	Cellular senescence	Cellular Processes	Cell growth and death	25	893	173	7679	0.146955	0.408365	1.24265	Ccna2;Ccnb1;Ccnb2;Ccne1;Cdk1;Cdkn2b;Chek1;E2f1;Foxm1;Gadd45b;Il1a;Il6;Mybl2;Nfkb1;Pik3cb;Pik3r3;Rbl1;RT1-A1;RT1-A2;RT1-CE10;RT1-CE3;RT1-CE5;RT1-M2;Serpine1;Tgfb1	rno04218
rno04260	Cardiac muscle contraction	Organismal Systems	Circulatory system	7	893	75	7679	0.784695	1	0.802583	Atp1a3;Atp1b1;Atp1b3;Cacng7;Myl4;Tpm3;Tpm4	rno04260
rno04261	Adrenergic signaling in cardiomyocytes	Organismal Systems	Circulatory system	15	893	143	7679	0.704666	1	0.902004	Adcy7;Adcy8;Adra1d;Agtr2;Atp1a3;Atp1b1;Atp1b3;Cacng7;Camk2b;Creb3l4;Myl4;Pik3r5;Scn5a;Tpm3;Tpm4	rno04261
rno04270	Vascular smooth muscle contraction	Organismal Systems	Circulatory system	10	893	130	7679	0.946415	1	0.66147	Adcy7;Adcy8;Adora2a;Adra1d;Ednra;Pla2g2d;Pla2g2f;Pla2g4f;Ptgir;Ramp3	rno04270
rno04310	Wnt signaling pathway	Environmental Information Processing	Signal transduction	9	893	143	7679	0.989172	1	0.541202	Camk2b;Fzd5;Mmp7;Peg12;Rac2;Sfrp1;Sfrp4;Wif1;Wisp1	rno04310
rno04350	TGF-beta signaling pathway	Environmental Information Processing	Signal transduction	10	893	84	7679	0.519369	0.938989	1.0237	Bmpr1b;Cdkn2b;Gdf6;Ifng;Inhba;Inhbb;Rbl1;Tgfb1;Thbs1;Tnf	rno04350
rno04360	Axon guidance	Organismal Systems	Development and regeneration	20	893	175	7679	0.569306	0.997148	0.982755	Bmpr1b;Camk2b;Cxcr4;Ephb1;Ephb2;Fes;Met;Pik3cb;Pik3r3;Plxnc1;Rac2;Rhod;Rnd1;Robo3;Sema4b;Sema4d;Sema7a;Slit2;Slit3;Unc5a	rno04360
rno04370	VEGF signaling pathway	Environmental Information Processing	Signal transduction	7	893	57	7679	0.499984	0.938989	1.05603	Pik3cb;Pik3r3;Pla2g4f;Rac2;Sh2d2a;Sphk1;Vegfa	rno04370
rno04371	Apelin signaling pathway	Environmental Information Processing	Signal transduction	14	893	134	7679	0.706351	1	0.898414	Adcy7;Adcy8;Apln;Aplnr;Ctgf;Gng4;Gngt2;Myl4;Nos2;Pik3r5;Plat;Serpine1;Sphk1;Spp1	rno04371
rno04380	Osteoclast differentiation	Organismal Systems	Development and regeneration	36	893	122	7679	6.40585e-08	6.85663e-07	2.53744	Acp5;Btk;Cyba;Fcgr1a;Fcgr2a;Fcgr3a;Ifng;Ifngr1;Il1a;Il1b;Lck;Lilrb3;Lilrb3a;Lilrb3l;Lilrb4;Lilrc2;Ncf1;Ncf2;Ncf4;Nfkb1;Nfkb2;Nfkbia;Oscar;Pik3cb;Pik3r3;Pirb;Relb;Sirpa;Socs3;Spi1;Syk;Tgfb1;Tnf;Tnfsf11;Trem2;Tyrobp	rno04380
rno04390	Hippo signaling pathway	Environmental Information Processing	Signal transduction	10	893	152	7679	0.987081	1	0.565731	Areg;Birc5;Bmpr1b;Ctgf;Fzd5;Gdf6;Itgb2;Serpine1;Tgfb1;Tp73	rno04390
rno04510	Focal adhesion	Cellular Processes	Cellular community - eukaryotes	26	893	196	7679	0.264973	0.624898	1.1407	Birc3;Col4a1;Col4a2;Col6a4;Fn1;Igf1;Itga2;Itga3;Itga4;Itga5;Itga8;Itgb7;Lama1;Lamc2;Met;Parvg;Pik3cb;Pik3r3;Rac2;Rasgrf1;Spp1;Thbs1;Thbs4;Tnn;Vav1;Vegfa	rno04510
rno04512	ECM-receptor interaction	Environmental Information Processing	Signaling molecules and interaction	19	893	82	7679	0.00226217	0.0107175	1.99248	Cd44;Col4a1;Col4a2;Col6a4;Fn1;Gp6;Hmmr;Itga2;Itga3;Itga4;Itga5;Itga8;Itgb7;Lama1;Lamc2;Spp1;Thbs1;Thbs4;Tnn	rno04512
rno04514	Cell adhesion molecules (CAMs)	Environmental Information Processing	Signaling molecules and interaction	48	893	155	7679	6.2188e-11	1.38249e-09	2.66295	Cd2;Cd22;Cd226;Cd274;Cd28;Cd40;Cd40lg;Cd80;Cd8a;Cd8b;Cldn18;Cldn2;Cldn3;Cldn7;Ctla4;F11r;Icam1;Icos;Itga4;Itga8;Itgal;Itgam;Itgb2;Itgb7;Nrcam;Nrxn3;Pdcd1lg2;Ptprc;PVR;RT1-A1;RT1-A2;RT1-Ba;RT1-Bb;RT1-CE10;RT1-CE3;RT1-CE5;RT1-Da;RT1-Db1;RT1-DMb;RT1-DOa;RT1-DOb;RT1-M2;Sell;Selp;Selplg;Spn;Vcan;Vtcn1	rno04514
rno04520	Adherens junction	Cellular Processes	Cellular community - eukaryotes	5	893	71	7679	0.927696	1	0.605571	Met;Ptpn1;Ptpn6;Rac2;Was	rno04520
rno04530	Tight junction	Cellular Processes	Cellular community - eukaryotes	16	893	165	7679	0.816104	1	0.833853	Cgnl1;Cldn18;Cldn2;Cldn3;Cldn7;F11r;Hcls1;Micall2;Msn;Myh1;Myh2;Myh3;Rab13;Tjp2;Tjp3;Was	rno04530
rno04540	Gap junction	Cellular Processes	Cellular community - eukaryotes	9	893	86	7679	0.682591	1	0.899906	Adcy7;Adcy8;Cdk1;Drd1;Gja1;Prkg2;Tubb2a;Tubb2b;Tubb3	rno04540
rno04550	Signaling pathways regulating pluripotency of stem cells	Cellular Processes	Cellular community - eukaryotes	10	893	135	7679	0.960544	1	0.636971	Bmpr1b;Fzd5;Igf1;Inhba;Inhbb;Jak3;Lif;Onecut1;Pik3cb;Pik3r3	rno04550
rno04610	Complement and coagulation cascades	Organismal Systems	Immune system	29	893	80	7679	7.64295e-09	1.10441e-07	3.11718	Bdkrb1;C1qa;C1qb;C1s;C2;C3;C3ar1;C4bpa;C5;C5ar1;Cd55;Cfd;Cfi;F10;F2r;F2rl2;F3;F5;Fgg;Itgam;Itgax;Itgb2;Masp1;Plat;Plau;Plaur;Serpinb2;Serpine1;Vsig4	rno04610
rno04611	Platelet activation	Organismal Systems	Immune system	18	893	124	7679	0.189634	0.484992	1.24826	Adcy7;Adcy8;Btk;F2r;Fcer1g;Fermt3;Fgg;Gp6;Itga2;Lyn;Pik3cb;Pik3r3;Pik3r5;Pla2g4f;Prkg2;Ptgir;Rasgrp1;Syk	rno04611
rno04612	Antigen processing and presentation	Organismal Systems	Immune system	26	893	78	7679	3.17014e-07	2.86304e-06	2.86637	Cd74;Cd8a;Cd8b;Ciita;Ifi30;Ifng;Klrc1;Klrc2;Klrc3;Lgmn;RT1-A1;RT1-A2;RT1-Ba;RT1-Bb;RT1-CE10;RT1-CE3;RT1-CE5;RT1-Da;RT1-Db1;RT1-DMb;RT1-DOa;RT1-DOb;RT1-M2;Tap1;Tap2;Tnf	rno04612
rno04614	Renin-angiotensin system	Organismal Systems	Endocrine system	6	893	35	7679	0.21591	0.542591	1.47413	Agtr2;Cma1;Cpa3;Mcpt1l1;Prcp;Ren	rno04614
rno04620	Toll-like receptor signaling pathway	Organismal Systems	Immune system	29	893	91	7679	2.00225e-07	1.92884e-06	2.74037	Casp8;Ccl3;Ccl4;Ccl5;Cd14;Cd40;Cd80;Cxcl10;Cxcl11;Cxcl9;Ikbke;Il12b;Il1b;Il6;Irf5;Irf7;Ly96;Myd88;Nfkb1;Nfkbia;Pik3cb;Pik3r3;Spp1;Tlr1;Tlr2;Tlr5;Tlr6;Tlr9;Tnf	rno04620
rno04621	NOD-like receptor signaling pathway	Organismal Systems	Immune system	39	893	154	7679	1.49267e-06	1.19828e-05	2.1777	Aim2;Birc3;Camp;Casp1;Casp12;Casp4;Casp8;Ccl12;Ccl2;Ccl5;Cxcl1;Cxcl2;Cxcl3;Cyba;Cybb;Gbp2;Gbp4;Ikbke;Il18;Il1b;Il6;Irf7;Mefv;Myd88;Naip5;Naip6;Nfkb1;Nfkbia;Nlrc4;Nlrp12;Nlrp3;Oas3;Pstpip1;Ripk3;Tnf;Tnfaip3;Trpm2;Trpv2;Txn1	rno04621
rno04622	RIG-I-like receptor signaling pathway	Organismal Systems	Immune system	9	893	60	7679	0.258734	0.617968	1.28987	Casp8;Cxcl10;Ikbke;Il12b;Irf7;Isg15;Nfkb1;Nfkbia;Tnf	rno04622
rno04623	Cytosolic DNA-sensing pathway	Organismal Systems	Immune system	15	893	52	7679	0.000600562	0.00315568	2.48051	Aim2;Casp1;Ccl4;Ccl5;Cxcl10;Ikbke;Il18;Il1b;Il6;Irf7;Mb21d1;Nfkb1;Nfkbia;Ripk3;Zbp1	rno04623
rno04625	C-type lectin receptor signaling pathway	Organismal Systems	Immune system	27	893	108	7679	7.70949e-05	0.000464176	2.14978	Bcl3;Casp1;Casp8;Ccl17;Ccl22;Clec4b2;Clec4d;Clec4e;Clec7a;Egr2;Fcer1g;Ikbke;Il10;Il12b;Il1b;Il23a;Il6;Irf1;Nfkb1;Nfkb2;Nfkbia;Nlrp3;Pik3cb;Pik3r3;Relb;Syk;Tnf	rno04625
rno04630	Jak-STAT signaling pathway	Environmental Information Processing	Signal transduction	38	893	151	7679	2.39817e-06	1.83057e-05	2.16401	Aox2;Csf2;Csf2ra;Csf2rb;Csf3;Csf3r;Ifng;Ifngr1;Il10;Il11;Il12b;Il12rb1;Il15ra;Il19;Il20ra;Il21r;Il22;Il22ra1;Il22ra2;Il23a;Il24;Il2ra;Il2rb;Il2rg;Il5ra;Il6;Il7;Il9r;Jak3;Lif;Osm;Osmr;Pik3cb;Pik3r3;Pim1;Ptpn6;Socs3;Stat4	rno04630
rno04640	Hematopoietic cell lineage	Organismal Systems	Immune system	47	893	87	7679	4.05042e-22	5.85286e-20	4.64549	Cd14;Cd19;Cd2;Cd22;Cd24;Cd33;Cd37;Cd38;Cd3d;Cd3e;Cd44;Cd5;Cd55;Cd8a;Cd8b;Csf2;Csf2ra;Csf3;Csf3r;Dntt;Fcgr1a;Flt3;Il11;Il1a;Il1b;Il1r2;Il2ra;Il5ra;Il6;Il7;Il9r;Itga2;Itga3;Itga4;Itga5;Itgam;Kit;RT1-Ba;RT1-Bb;RT1-Da;RT1-Db1;RT1-DMb;RT1-DOa;RT1-DOb;Siglech;Tfrc;Tnf	rno04640
rno04650	Natural killer cell mediated cytotoxicity	Organismal Systems	Immune system	46	893	125	7679	1.54641e-13	5.58642e-12	3.16447	Casp3;Cd244;Cd247;Csf2;Faslg;Fcer1g;Fcgr2a;Fcgr3a;Gzmb;Gzmbl2;Hcst;Icam1;Ifng;Ifngr1;Itgal;Itgb2;Klrc1;Klrc2;Klrc3;Klrk1;Lat;Lck;Ncr1;Ncr3;Pik3cb;Pik3r3;Prf1;Ptpn6;Rac2;Raet1d;Raet1e;RT1-A1;RT1-A2;RT1-CE10;RT1-CE3;RT1-CE5;RT1-M2;Sh2d1a;Sh2d1b;Sh3bp2;Syk;Tnf;Tnfrsf10b;Tyrobp;Vav1;Zap70	rno04650
rno04657	IL-17 signaling pathway	Organismal Systems	Immune system	37	893	91	7679	1.12917e-12	3.62588e-11	3.49634	Casp3;Casp8;Ccl12;Ccl17;Ccl2;Ccl20;Ccl7;Cebpb;Csf2;Csf3;Cxcl1;Cxcl10;Cxcl2;Cxcl3;Cxcl6;Ifng;Ikbke;Il17a;Il17b;Il17c;Il17f;Il17ra;Il1b;Il6;Lcn2;Mapk6;Mmp13;Mmp3;Mmp9;Muc5ac;Muc5b;Nfkb1;Nfkbia;S100a8;S100a9;Tnf;Tnfaip3	rno04657
rno04658	Th1 and Th2 cell differentiation	Organismal Systems	Immune system	27	893	88	7679	1.22377e-06	1.01048e-05	2.63836	Cd247;Cd3d;Cd3e;Ifng;Ifngr1;Il12b;Il12rb1;Il2ra;Il2rb;Il2rg;Jak3;Lat;Lck;Nfkb1;Nfkbia;Nfkbie;RT1-Ba;RT1-Bb;RT1-Da;RT1-Db1;RT1-DMb;RT1-DOa;RT1-DOb;Runx3;Stat4;Tbx21;Zap70	rno04658
rno04659	Th17 cell differentiation	Organismal Systems	Immune system	33	893	102	7679	1.90437e-08	2.29318e-07	2.78206	Cd247;Cd3d;Cd3e;Hif1a;Ifng;Ifngr1;Il12rb1;Il17a;Il17f;Il1b;Il21r;Il22;Il23a;Il2ra;Il2rb;Il2rg;Il6;Jak3;Lat;Lck;Nfkb1;Nfkbia;Nfkbie;RT1-Ba;RT1-Bb;RT1-Da;RT1-Db1;RT1-DMb;RT1-DOa;RT1-DOb;Tbx21;Tgfb1;Zap70	rno04659
rno04660	T cell receptor signaling pathway	Organismal Systems	Immune system	27	893	101	7679	2.14461e-05	0.000144138	2.29877	Card11;Cd247;Cd28;Cd3d;Cd3e;Cd40lg;Cd8a;Cd8b;Csf2;Ctla4;Icos;Ifng;Il10;Itk;Lat;Lck;Nfkb1;Nfkbia;Nfkbie;Pik3cb;Pik3r3;Ptpn6;Ptprc;Rasgrp1;Tnf;Vav1;Zap70	rno04660
rno04662	B cell receptor signaling pathway	Organismal Systems	Immune system	18	893	70	7679	0.000818956	0.0042264	2.2112	Btk;Card11;Cd19;Cd22;Cd72;Ifitm1;Inpp5d;Lyn;Nfkb1;Nfkbia;Nfkbie;Pik3cb;Pik3r3;Pirb;Ptpn6;Rac2;Syk;Vav1	rno04662
rno04664	Fc epsilon RI signaling pathway	Organismal Systems	Immune system	14	893	65	7679	0.0156135	0.0593723	1.85211	Btk;Csf2;Fcer1g;Inpp5d;Lat;Lyn;Ms4a2;Pik3cb;Pik3r3;Pla2g4f;Rac2;Syk;Tnf;Vav1	rno04664
rno04666	Fc gamma R-mediated phagocytosis	Organismal Systems	Immune system	21	893	85	7679	0.000557355	0.00298288	2.12448	Arpc1b;Arpc3;Dock2;Fcgr1a;Fcgr2a;Hck;Inpp5d;Lat;Lyn;Marcksl1;Myo10;Ncf1;Pik3cb;Pik3r3;Ptprc;Rac2;Scin;Sphk1;Syk;Vav1;Was	rno04666
rno04668	TNF signaling pathway	Environmental Information Processing	Signal transduction	33	893	106	7679	5.47625e-08	6.08706e-07	2.67708	Bcl3;Birc3;Casp3;Casp8;Ccl12;Ccl2;Ccl20;Ccl5;Cebpb;Creb3l4;Csf2;Cx3cl1;Cxcl1;Cxcl10;Cxcl2;Cxcl3;Icam1;Ifi47;Il1b;Il6;Lif;Mlkl;Mmp3;Mmp9;Nfkb1;Nfkbia;Pik3cb;Pik3r3;Ripk3;Socs3;Tnf;Tnfaip3;Tnfrsf1b	rno04668
rno04670	Leukocyte transendothelial migration	Organismal Systems	Immune system	26	893	113	7679	0.000433444	0.0023635	1.97855	Cldn18;Cldn2;Cldn3;Cldn7;Cxcr4;Cyba;Cybb;F11r;Icam1;Itga4;Itgal;Itgam;Itgb2;Itk;Mmp2;Mmp9;Msn;Ncf1;Ncf2;Ncf4;Pik3cb;Pik3r3;Rac2;Rhoh;Thy1;Vav1	rno04670
rno04672	Intestinal immune network for IgA production	Organismal Systems	Immune system	21	893	42	7679	9.30346e-10	1.68044e-08	4.29955	Ccr9;Cd28;Cd40;Cd40lg;Cd80;Cxcr4;Icos;Il10;Il15ra;Il6;Itga4;Itgb7;Pigr;RT1-Ba;RT1-Bb;RT1-Da;RT1-Db1;RT1-DMb;RT1-DOa;RT1-DOb;Tgfb1	rno04672
rno04710	Circadian rhythm	Organismal Systems	Environmental adaptation	1	893	30	7679	0.975676	1	0.286637	Bhlhe40	rno04710
rno04713	Circadian entrainment	Organismal Systems	Environmental adaptation	6	893	96	7679	0.973862	1	0.537444	Adcy7;Adcy8;Camk2b;Gng4;Gngt2;Prkg2	rno04713
rno04714	Thermogenesis	Organismal Systems	Environmental adaptation	6	893	214	7679	1	1	0.241096	Adcy7;Adcy8;Creb3l4;Ndufa4l2;Prkg2;Rps6ka1	rno04714
rno04720	Long-term potentiation	Organismal Systems	Nervous system	3	893	66	7679	0.986883	1	0.390868	Adcy8;Camk2b;Rps6ka1	rno04720
rno04721	Synaptic vesicle cycle	Organismal Systems	Nervous system	2	893	62	7679	0.995809	1	0.27739	Slc32a1;Snap25	rno04721
rno04722	Neurotrophin signaling pathway	Organismal Systems	Nervous system	14	893	119	7679	0.524589	0.941654	1.01166	Bdnf;Camk2b;Faslg;Matk;Nfkb1;Nfkbia;Nfkbie;Ntf4;Ntrk1;Pik3cb;Pik3r3;Rps6ka1;Sh2b2;Tp73	rno04722
rno04723	Retrograde endocannabinoid signaling	Organismal Systems	Nervous system	8	893	138	7679	0.993504	1	0.498499	Adcy7;Adcy8;Gabrp;Gabrr2;Gng4;Gngt2;Ndufa4l2;Slc32a1	rno04723
rno04724	Glutamatergic synapse	Organismal Systems	Nervous system	5	893	112	7679	0.997697	1	0.383889	Adcy7;Adcy8;Gng4;Gngt2;Pla2g4f	rno04724
rno04725	Cholinergic synapse	Organismal Systems	Nervous system	12	893	111	7679	0.651162	1	0.929633	Adcy7;Adcy8;Camk2b;Chrna3;Chrnb4;Creb3l4;Gng4;Gngt2;Kcnj2;Pik3cb;Pik3r3;Pik3r5	rno04725
rno04726	Serotonergic synapse	Organismal Systems	Nervous system	10	893	119	7679	0.899093	1	0.722614	Alox12e;Alox15;Casp3;Cyp2c11;Cyp2d1;Gng4;Gngt2;Htr7;Pla2g4f;Tph1	rno04726
rno04727	GABAergic synapse	Organismal Systems	Nervous system	8	893	87	7679	0.808303	1	0.790722	Adcy7;Adcy8;Gabrp;Gabrr2;Gng4;Gngt2;Hap1;Slc32a1	rno04727
rno04728	Dopaminergic synapse	Organismal Systems	Nervous system	7	893	129	7679	0.994984	1	0.466618	Camk2b;Creb3l4;Drd1;Gng4;Gngt2;Kif5c;Ppp1r1b	rno04728
rno04730	Long-term depression	Organismal Systems	Nervous system	5	893	60	7679	0.842637	1	0.716592	Grid2;Igf1;Lyn;Pla2g4f;Prkg2	rno04730
rno04740	Olfactory transduction	Organismal Systems	Sensory system	8	893	1088	7679	1	1	0.0632287	Camk2b;Olr1158;Olr1462;Olr292;Olr300;Olr302;Olr59;Prkg2	rno04740
rno04742	Taste transduction	Organismal Systems	Sensory system	3	893	86	7679	0.998249	1	0.299969	Adcy8;Scn3a;Scnn1a	rno04742
rno04744	Phototransduction	Organismal Systems	Sensory system	2	893	26	7679	0.822818	1	0.66147	Gucy2f;Slc24a1	rno04744
rno04750	Inflammatory mediator regulation of TRP channels	Organismal Systems	Sensory system	17	893	111	7679	0.142665	0.408219	1.31698	Adcy7;Adcy8;Alox12e;Bdkrb1;Camk2b;Cyp2c11;F2rl1;Igf1;Il1b;Ntrk1;Pik3cb;Pik3r3;Pla2g4f;Ptger2;Trpa1;Trpm8;Trpv2	rno04750
rno04810	Regulation of actin cytoskeleton	Cellular Processes	Cell motility	33	893	208	7679	0.0383256	0.131858	1.36428	Arpc1b;Arpc3;Bdkrb1;Cd14;Diaph3;F2r;Fgd3;Fgf9;Fn1;Insrr;Iqgap3;Itga2;Itga3;Itga4;Itga5;Itga8;Itgad;Itgae;Itgal;Itgam;Itgax;Itgb2;Itgb7;Msn;Nckap1l;Pfn2;Pik3cb;Pik3r3;Rac2;Scin;Tmsb4x;Vav1;Was	rno04810
rno04910	Insulin signaling pathway	Organismal Systems	Endocrine system	7	893	134	7679	0.996672	1	0.449207	Hk2;Hk3;Pik3cb;Pik3r3;Ptpn1;Sh2b2;Socs3	rno04910
rno04911	Insulin secretion	Organismal Systems	Endocrine system	9	893	85	7679	0.668785	1	0.910493	Adcy7;Adcy8;Atp1a3;Atp1b1;Atp1b3;Camk2b;Creb3l4;Slc2a1;Snap25	rno04911
rno04912	GnRH signaling pathway	Organismal Systems	Endocrine system	6	893	89	7679	0.955759	1	0.579715	Adcy7;Adcy8;Camk2b;Hbegf;Mmp2;Pla2g4f	rno04912
rno04913	Ovarian Steroidogenesis	Organismal Systems	Endocrine system	6	893	51	7679	0.553027	0.980521	1.01166	Adcy7;Adcy8;Cyp1b1;Igf1;Ldlr;Pla2g4f	rno04913
rno04914	Progesterone-mediated oocyte maturation	Organismal Systems	Endocrine system	18	893	88	7679	0.0114201	0.0458389	1.75891	Adcy7;Adcy8;Aurka;Bub1;Ccna2;Ccnb1;Ccnb2;Cdc25c;Cdk1;Igf1;Kif22;Mad2l1;Pgr;Pik3cb;Pik3r3;Pkmyt1;Plk1;Rps6ka1	rno04914
rno04915	Estrogen signaling pathway	Organismal Systems	Endocrine system	18	893	130	7679	0.24929	0.606424	1.19065	Adcy7;Adcy8;Creb3l4;Ctsd;Hbegf;Krt14;Krt15;Krt16;Krt17;Krt19;Krt23;Krt42;Mmp2;Mmp9;Pgr;Pik3cb;Pik3r3;Tgfa	rno04915
rno04916	Melanogenesis	Organismal Systems	Endocrine system	7	893	98	7679	0.948125	1	0.614222	Adcy7;Adcy8;Camk2b;Creb3l4;Ednrb;Fzd5;Kit	rno04916
rno04917	Prolactin signaling pathway	Organismal Systems	Endocrine system	6	893	72	7679	0.857997	1	0.716592	Irf1;Nfkb1;Pik3cb;Pik3r3;Socs3;Tnfsf11	rno04917
rno04918	Thyroid hormone synthesis	Organismal Systems	Endocrine system	13	893	72	7679	0.0697651	0.231748	1.55262	Adcy7;Adcy8;Atp1a3;Atp1b1;Atp1b3;Creb3l4;Duox2;Duoxa2;Gpx2;Gsr;Pax8;Slc26a4;Tg	rno04918
rno04919	Thyroid hormone signaling pathway	Organismal Systems	Endocrine system	10	893	117	7679	0.887508	1	0.734966	Atp1a3;Atp1b1;Atp1b3;Dio2;Dio3;Hif1a;Pik3cb;Pik3r3;Rcan1;Slc2a1	rno04919
rno04920	Adipocytokine signaling pathway	Organismal Systems	Endocrine system	7	893	71	7679	0.734103	1	0.847799	Nfkb1;Nfkbia;Nfkbie;Slc2a1;Socs3;Tnf;Tnfrsf1b	rno04920
rno04921	Oxytocin signaling pathway	Organismal Systems	Endocrine system	10	893	152	7679	0.987081	1	0.565731	Adcy7;Adcy8;Cacng7;Camk2b;Cd38;Kcnj2;Pik3r5;Pla2g4f;Rcan1;Trpm2	rno04921
rno04922	Glucagon signaling pathway	Organismal Systems	Endocrine system	4	893	100	7679	0.998092	1	0.343964	Camk2b;Creb3l4;Ldha;Slc2a1	rno04922
rno04923	Regulation of lipolysis in adipocyte	Organismal Systems	Endocrine system	7	893	55	7679	0.46102	0.90048	1.09443	Adcy7;Adcy8;Adora1;Fabp4;Pik3cb;Pik3r3;Prkg2	rno04923
rno04924	Renin secretion	Organismal Systems	Endocrine system	11	893	68	7679	0.161217	0.423562	1.39103	Adora1;Clca1;Clca2;Clca4;Clca4l;Clca5;Ednra;Kcnj2;Prkg2;Ptger2;Ren	rno04924
rno04925	Aldosterone synthesis and secretion	Organismal Systems	Endocrine system	8	893	94	7679	0.869614	1	0.731839	Adcy7;Adcy8;Atp1a3;Atp1b1;Atp1b3;Camk2b;Creb3l4;Ldlr	rno04925
rno04926	Relaxin signaling pathway	Organismal Systems	Endocrine system	20	893	126	7679	0.0909767	0.285786	1.36494	Adcy7;Adcy8;Col4a1;Col4a2;Creb3l4;Ednrb;Gna15;Gng4;Gngt2;Insl3;Mmp13;Mmp2;Mmp9;Nfkb1;Nfkbia;Nos2;Pik3cb;Pik3r3;Tgfb1;Vegfa	rno04926
rno04927	Cortisol synthesis and secretion	Organismal Systems	Endocrine system	5	893	63	7679	0.871628	1	0.682469	Adcy7;Adcy8;Creb3l4;Cyp11b2;Ldlr	rno04927
rno04930	Type II diabetes mellitus	Human Diseases	Endocrine and metabolic disease	7	893	47	7679	0.302699	0.683437	1.28072	Cacna1e;Hk2;Hk3;Pik3cb;Pik3r3;Socs3;Tnf	rno04930
rno04931	Insulin resistance	Human Diseases	Endocrine and metabolic disease	13	893	108	7679	0.492011	0.935467	1.03508	Creb3l4;Gfpt1;Il6;Nfkb1;Nfkbia;Pik3cb;Pik3r3;Ptpn1;Rps6ka1;Slc2a1;Socs3;Tnf;Trib3	rno04931
rno04932	Non-alcoholic fatty liver disease (NAFLD)	Human Diseases	Endocrine and metabolic disease	14	893	145	7679	0.80855	1	0.830258	Casp3;Casp8;Cebpa;Faslg;Il1a;Il1b;Il6;Ndufa4l2;Nfkb1;Pik3cb;Pik3r3;Socs3;Tgfb1;Tnf	rno04932
rno04933	AGE-RAGE signaling pathway in diabetic complications	Human Diseases	Endocrine and metabolic disease	22	893	99	7679	0.00188466	0.00939083	1.91091	Casp3;Ccl12;Ccl2;Col4a1;Col4a2;Cybb;F3;Fn1;Icam1;Il1a;Il1b;Il6;Mmp2;Nfkb1;Nox4;Pik3cb;Pik3r3;Pim1;Serpine1;Tgfb1;Tnf;Vegfa	rno04933
rno04934	Cushing's syndrome	Human Diseases	Endocrine and metabolic disease	10	893	153	7679	0.987943	1	0.562033	Adcy7;Adcy8;Camk2b;Ccne1;Cdkn2b;Creb3l4;Cyp11b2;E2f1;Fzd5;Ldlr	rno04934
rno04940	Type I diabetes mellitus	Human Diseases	Endocrine and metabolic disease	25	893	60	7679	2.95858e-09	4.50016e-08	3.58296	Cd28;Cd80;Faslg;Gzmb;Gzmbl2;Ifng;Il12b;Il1a;Il1b;Prf1;Ptprn;RT1-A1;RT1-A2;RT1-Ba;RT1-Bb;RT1-CE10;RT1-CE3;RT1-CE5;RT1-Da;RT1-Db1;RT1-DMb;RT1-DOa;RT1-DOb;RT1-M2;Tnf	rno04940
rno04950	Maturity onset diabetes of the young	Human Diseases	Endocrine and metabolic disease	1	893	27	7679	0.964704	1	0.318485	Onecut1	rno04950
rno04960	Aldosterone-regulated sodium reabsorption	Organismal Systems	Excretory system	7	893	38	7679	0.145606	0.408365	1.58405	Atp1a3;Atp1b1;Atp1b3;Igf1;Pik3cb;Pik3r3;Scnn1a	rno04960
rno04961	Endocrine and other factor-regulated calcium reabsorption	Organismal Systems	Excretory system	4	893	52	7679	0.869805	1	0.66147	Atp1a3;Atp1b1;Atp1b3;Vdr	rno04961
rno04962	Vasopressin-regulated water reabsorption	Organismal Systems	Excretory system	2	893	42	7679	0.964067	1	0.409481	Aqp4;Creb3l4	rno04962
rno04964	Proximal tubule bicarbonate reclamation	Organismal Systems	Excretory system	5	893	22	7679	0.10374	0.315588	1.95434	Atp1a3;Atp1b1;Atp1b3;Car2;Car4	rno04964
rno04966	Collecting duct acid secretion	Organismal Systems	Excretory system	1	893	27	7679	0.964704	1	0.318485	Car2	rno04966
rno04970	Salivary secretion	Organismal Systems	Digestive system	13	893	76	7679	0.0981514	0.305008	1.4709	Adcy7;Adcy8;Adra1d;Atp1a3;Atp1b1;Atp1b3;Bst1;Camp;Cd38;Lpo;Lyz2;Muc5b;Prkg2	rno04970
rno04971	Gastric acid secretion	Organismal Systems	Digestive system	10	893	74	7679	0.356971	0.751101	1.16204	Adcy7;Adcy8;Atp1a3;Atp1b1;Atp1b3;Camk2b;Car2;Kcnj15;Kcnj16;Kcnj2	rno04971
rno04972	Pancreatic secretion	Organismal Systems	Digestive system	16	893	98	7679	0.10022	0.308123	1.40394	Adcy7;Adcy8;Atp1a3;Atp1b1;Atp1b3;Bst1;Car2;Cd38;Clca1;Clca2;Clca4;Clca4l;Clca5;Cpa3;Pla2g2d;Pla2g2f	rno04972
rno04973	Carbohydrate digestion and absorption	Organismal Systems	Digestive system	7	893	39	7679	0.1608	0.423562	1.54343	Atp1a3;Atp1b1;Atp1b3;Hk2;Hk3;Pik3cb;Pik3r3	rno04973
rno04974	Protein digestion and absorption	Organismal Systems	Digestive system	15	893	87	7679	0.0755449	0.245309	1.4826	Atp1a3;Atp1b1;Atp1b3;Col11a1;Col12a1;Col13a1;Col18a1;Col4a1;Col4a2;Col6a4;Cpa3;Eln;Prcp;Slc15a1;Slc7a8	rno04974
rno04975	Fat digestion and absorption	Organismal Systems	Digestive system	2	893	40	7679	0.955794	1	0.429955	Pla2g2d;Pla2g2f	rno04975
rno04976	Bile secretion	Organismal Systems	Digestive system	14	893	71	7679	0.0320653	0.114406	1.6956	Abcb1b;Abcc3;Abcc4;Adcy7;Adcy8;Aqp4;Atp1a3;Atp1b1;Atp1b3;Car2;Ldlr;Slc10a2;Slc2a1;Slc4a5	rno04976
rno04977	Vitamin digestion and absorption	Organismal Systems	Digestive system	2	893	24	7679	0.786502	1	0.716592	Rbp2;Slc52a3	rno04977
rno04978	Mineral absorption	Organismal Systems	Digestive system	12	893	43	7679	0.00282559	0.0131709	2.39975	Atp1a3;Atp1b1;Atp1b3;Hmox1;Mt2A;Slc11a2;Slc26a9;Slc34a2;Slc39a4;Steap1;Trpm6;Vdr	rno04978
rno04979	Cholesterol metabolism	Organismal Systems	Digestive system	5	893	49	7679	0.688823	1	0.87746	Angptl4;Apoc3;Ldlr;Lipg;Pcsk9	rno04979
rno05010	Alzheimer's disease	Human Diseases	Neurodegenerative disease	6	893	164	7679	0.999935	1	0.314601	Casp12;Casp3;Casp8;Il1b;Ndufa4l2;Tnf	rno05010
rno05012	Parkinson's disease	Human Diseases	Neurodegenerative disease	4	893	127	7679	0.999873	1	0.270838	Adora2a;Casp3;Drd1;Ndufa4l2	rno05012
rno05014	Amyotrophic lateral sclerosis (ALS)	Human Diseases	Neurodegenerative disease	6	893	53	7679	0.592114	1	0.973483	Casp1;Casp12;Casp3;Nefh;Tnf;Tnfrsf1b	rno05014
rno05016	Huntington's disease	Human Diseases	Neurodegenerative disease	9	893	181	7679	0.99944	1	0.42758	Bdnf;Casp3;Casp8;Creb3l4;Dnah17;Hap1;Ndufa4l2;Polr2i;Sod2	rno05016
rno05020	Prion diseases	Human Diseases	Neurodegenerative disease	8	893	34	7679	0.037544	0.130726	2.02332	C1qa;C1qb;C5;Casp12;Ccl5;Il1a;Il1b;Il6	rno05020
rno05030	Cocaine addiction	Human Diseases	Substance dependence	5	893	47	7679	0.652127	1	0.914798	Bdnf;Creb3l4;Drd1;Nfkb1;Ppp1r1b	rno05030
rno05031	Amphetamine addiction	Human Diseases	Substance dependence	4	893	66	7679	0.957409	1	0.521158	Camk2b;Creb3l4;Drd1;Ppp1r1b	rno05031
rno05032	Morphine addiction	Human Diseases	Substance dependence	10	893	90	7679	0.610719	1	0.955456	Adcy7;Adcy8;Adora1;Drd1;Gabrp;Gabrr2;Gng4;Gngt2;Pde4c;Slc32a1	rno05032
rno05033	Nicotine addiction	Human Diseases	Substance dependence	3	893	40	7679	0.85995	1	0.644933	Gabrp;Gabrr2;Slc32a1	rno05033
rno05034	Alcoholism	Human Diseases	Substance dependence	26	893	143	7679	0.0131947	0.0519144	1.56347	Adora2a;Bdnf;Creb3l4;Drd1;Gng4;Gngt2;H2afx;Hist1h2ac;Hist1h2ah;Hist1h2ai;Hist1h2ail1;Hist1h2ak;Hist1h2an;Hist1h2ba;Hist1h2bcl1;Hist1h2bd;Hist1h2bf;Hist1h2bk;Hist1h2bl;Hist1h2bo;Hist1h3a;Hist2h3c2;Hist2h4;Hist2h4a;Hist3h2bb;Ppp1r1b	rno05034
rno05100	Bacterial invasion of epithelial cells	Human Diseases	Infectious disease: bacterial	9	893	75	7679	0.513659	0.938989	1.03189	Arpc1b;Arpc3;Fn1;Hcls1;Itga5;Met;Pik3cb;Pik3r3;Was	rno05100
rno05132	Salmonella infection	Human Diseases	Infectious disease: bacterial	23	893	80	7679	2.45081e-05	0.000160973	2.47224	Arpc1b;Arpc3;Casp1;Ccl3;Ccl4;Cd14;Csf2;Cxcl1;Cxcl2;Cxcl3;Ifng;Ifngr1;Il18;Il1a;Il1b;Il6;Myd88;Nfkb1;Nlrc4;Nos2;Pfn2;Tlr5;Was	rno05132
rno05133	Pertussis	Human Diseases	Infectious disease: bacterial	28	893	72	7679	2.19986e-09	3.532e-08	3.3441	C1qa;C1qb;C1s;C2;C3;C4bpa;C5;Casp1;Casp3;Cd14;Cxcl6;Il10;Il12b;Il1a;Il1b;Il23a;Il6;Irf1;Irf8;Itga5;Itgam;Itgb2;Ly96;Myd88;Nfkb1;Nlrp3;Nos2;Tnf	rno05133
rno05134	Legionellosis	Human Diseases	Infectious disease: bacterial	24	893	53	7679	7.82819e-10	1.50823e-08	3.89393	C3;Casp1;Casp3;Casp8;Cd14;Cxcl1;Cxcl2;Cxcl3;Il12b;Il18;Il1b;Il6;Itgam;Itgb2;Myd88;Naip5;Naip6;Nfkb1;Nfkb2;Nfkbia;Nlrc4;Tlr2;Tlr5;Tnf	rno05134
rno05140	Leishmaniasis	Human Diseases	Infectious disease: parasitic	34	893	65	7679	9.09179e-16	5.25505e-14	4.49799	C3;Cyba;Cybb;Fcgr1a;Fcgr2a;Fcgr3a;Ifng;Ifngr1;Il10;Il12b;Il1a;Il1b;Itga4;Itgam;Itgb2;Marcksl1;Myd88;Ncf1;Ncf2;Ncf4;Nfkb1;Nfkbia;Nos2;Ptpn6;RT1-Ba;RT1-Bb;RT1-Da;RT1-Db1;RT1-DMb;RT1-DOa;RT1-DOb;Tgfb1;Tlr2;Tnf	rno05140
rno05142	Chagas disease (American trypanosomiasis)	Human Diseases	Infectious disease: parasitic	31	893	101	7679	1.9852e-07	1.92884e-06	2.63933	C1qa;C1qb;C3;Casp8;Ccl12;Ccl2;Ccl3;Ccl5;Cd247;Cd3d;Cd3e;Faslg;Gna15;Ifng;Ifngr1;Il10;Il12b;Il1b;Il6;Myd88;Nfkb1;Nfkbia;Nos2;Pik3cb;Pik3r3;Serpine1;Tgfb1;Tlr2;Tlr6;Tlr9;Tnf	rno05142
rno05143	African trypanosomiasis	Human Diseases	Infectious disease: parasitic	14	893	34	7679	1.10467e-05	7.60117e-05	3.54081	F2rl1;Faslg;Icam1;Ido1;Ido2;Ifng;Il10;Il12b;Il18;Il1b;Il6;Myd88;Tlr9;Tnf	rno05143
rno05144	Malaria	Human Diseases	Infectious disease: parasitic	26	893	52	7679	9.01656e-12	2.3689e-10	4.29955	Ccl12;Ccl2;Cd40;Cd40lg;Csf3;Icam1;Ifng;Il10;Il18;Il1b;Il6;Itgal;Itgb2;Klrb1a;Klrb1b;Klrb1c;Klrk1;Met;Myd88;Selp;Tgfb1;Thbs1;Thbs4;Tlr2;Tlr9;Tnf	rno05144
rno05145	Toxoplasmosis	Human Diseases	Infectious disease: parasitic	33	893	107	7679	7.05485e-08	7.28161e-07	2.65206	Birc3;Casp3;Casp8;Ccr5;Cd40;Cd40lg;Ciita;Ifng;Ifngr1;Igtp;Il10;Il12b;Irgm;Lama1;Lamc2;Ldlr;Ly96;Myd88;Nfkb1;Nfkbia;Nos2;Pik3r5;RT1-Ba;RT1-Bb;RT1-Da;RT1-Db1;RT1-DMb;RT1-DOa;RT1-DOb;Tgfb1;Tlr11;Tlr2;Tnf	rno05145
rno05146	Amoebiasis	Human Diseases	Infectious disease: parasitic	28	893	96	7679	2.40697e-06	1.83057e-05	2.50807	Casp3;Cd14;Col4a1;Col4a2;Csf2;Fn1;Gna15;Ifng;Il10;Il12b;Il1b;Il1r2;Il6;Itgam;Itgb2;Lama1;Lamc2;Nfkb1;Nos2;Pik3cb;Pik3r3;Serpinb10;Serpinb1a;Serpinb3;Serpinb3a;Tgfb1;Tlr2;Tnf	rno05146
rno05150	Staphylococcus aureus infection	Human Diseases	Infectious disease: bacterial	33	893	46	7679	1.94027e-21	1.86912e-19	6.16892	C1qa;C1qb;C1s;C2;C3;C3ar1;C5;C5ar1;Cfd;Cfi;Dsg1;Fcar;Fcgr1a;Fcgr2a;Fcgr3a;Fgg;Fpr1;Icam1;Il10;Itgal;Itgam;Itgb2;Masp1;Ptafr;RT1-Ba;RT1-Bb;RT1-Da;RT1-Db1;RT1-DMb;RT1-DOa;RT1-DOb;Selp;Selplg	rno05150
rno05152	Tuberculosis	Human Diseases	Infectious disease: bacterial	48	893	169	7679	1.6645e-09	2.82964e-08	2.44235	C3;Camk2b;Camp;Casp3;Casp8;Cd14;Cd74;Cebpb;Ciita;Clec4e;Clec7a;Coro1a;Ctsd;Fcer1g;Fcgr1a;Fcgr2a;Fcgr3a;Ifng;Ifngr1;Il10;Il12b;Il18;Il1a;Il1b;Il23a;Il6;Itgam;Itgax;Itgb2;Myd88;Nfkb1;Nos2;RT1-Ba;RT1-Bb;RT1-Da;RT1-Db1;RT1-DMb;RT1-DOa;RT1-DOb;Sphk1;Syk;Tgfb1;Tlr1;Tlr2;Tlr6;Tlr9;Tnf;Vdr	rno05152
rno05160	Hepatitis C	Human Diseases	Infectious disease: viral	16	893	122	7679	0.343198	0.734698	1.12775	Cldn18;Cldn2;Cldn3;Cldn7;Ifit1bl;Ikbke;Irf1;Irf7;Ldlr;Nfkb1;Nfkbia;Oas3;Pik3cb;Pik3r3;Socs3;Tnf	rno05160
rno05161	Hepatitis B	Human Diseases	Infectious disease: viral	23	893	134	7679	0.0350463	0.123517	1.47597	Birc5;Casp12;Casp3;Casp8;Ccna2;Ccne1;Creb3l4;E2f1;Egr2;Faslg;Ikbke;Il6;Irf7;Mmp9;Myd88;Nfkb1;Nfkbia;Pik3cb;Pik3r3;Stat4;Tgfb1;Tlr2;Tnf	rno05161
rno05162	Measles	Human Diseases	Infectious disease: viral	31	893	125	7679	2.75225e-05	0.000176756	2.13258	Ccne1;Cd28;Cd3d;Cd3e;Faslg;Ifng;Ifngr1;Ikbke;Il12b;Il1a;Il1b;Il2ra;Il2rb;Il2rg;Il6;Irf7;Jak3;Msn;Myd88;Nfkb1;Nfkbia;Oas3;Pik3cb;Pik3r3;Sh2d1a;Slamf1;Tlr2;Tlr9;Tnfaip3;Tnfrsf10b;Tp73	rno05162
rno05164	Influenza A	Human Diseases	Infectious disease: viral	38	893	158	7679	7.65573e-06	5.53127e-05	2.06814	Casp1;Ccl12;Ccl2;Ccl5;Ciita;Cxcl10;Faslg;Furin;Icam1;Ifng;Ifngr1;Ikbke;Il12b;Il18;Il1a;Il1b;Il6;Irf7;Kpna2;Myd88;Nfkb1;Nfkbia;Nlrp3;Oas3;Pik3cb;Pik3r3;Rsad2;RT1-Ba;RT1-Bb;RT1-Da;RT1-Db1;RT1-DMb;RT1-DOa;RT1-DOb;Socs3;Tmprss4;Tnf;Tnfrsf10b	rno05164
rno05165	Human papillomavirus infection	Human Diseases	Infectious disease: viral	42	893	327	7679	0.26596	0.624898	1.10447	Bak1;Casp3;Casp8;Ccna2;Ccne1;Col4a1;Col4a2;Col6a4;Creb3l4;E2f1;Faslg;Fn1;Fzd5;Ikbke;Irf1;Isg15;Itga2;Itga3;Itga4;Itga5;Itga8;Itgb7;Lama1;Lamc2;Nfkb1;Oasl;Oasl2;Pik3cb;Pik3r3;Rbl1;RT1-A1;RT1-A2;RT1-CE10;RT1-CE3;RT1-CE5;RT1-M2;Spp1;Thbs1;Thbs4;Tnf;Tnn;Vegfa	rno05165
rno05166	HTLV-I infection	Human Diseases	Infectious disease: viral	54	893	269	7679	3.26677e-05	0.000200872	1.72621	Adcy7;Adcy8;Bub1b;Ccnb2;Cd3d;Cd3e;Cd40;Cdc20;Cdkn2b;Chek1;Csf2;E2f1;Egr2;Fzd5;Icam1;Il15ra;Il1r2;Il2ra;Il2rb;Il2rg;Il6;Itgal;Itgb2;Jak3;Lck;Mad2l1;Mybl2;Nfkb1;Nfkb2;Nfkbia;Pik3cb;Pik3r3;Pole;Pole2;Pttg1;Relb;RGD1560020_predicted;RT1-A1;RT1-A2;RT1-Ba;RT1-Bb;RT1-CE10;RT1-CE3;RT1-CE5;RT1-Da;RT1-Db1;RT1-DMb;RT1-DOa;RT1-DOb;RT1-M2;Slc2a1;Spi1;Tgfb1;Tnf	rno05166
rno05167	Kaposi's sarcoma-associated herpesvirus infection	Human Diseases	Infectious disease: viral	41	893	194	7679	8.85814e-05	0.000522449	1.81734	Bak1;C3;Casp3;Casp8;Ccr1l1;Ccr3;Ccr4;Ccr5;Ccr8;Cd200r1;Clec2h;Csf2;Cxcl1;Cxcl2;Cxcl3;E2f1;Gng4;Gngt2;Hck;Hif1a;Icam1;Ifngr1;Ikbke;Il6;Irf7;Lyn;Nfkb1;Nfkbia;Pik3cb;Pik3r3;Pik3r5;Prex1;Rcan1;RT1-A1;RT1-A2;RT1-CE10;RT1-CE3;RT1-CE5;RT1-M2;Syk;Vegfa	rno05167
rno05168	Herpes simplex infection	Human Diseases	Infectious disease: viral	44	893	190	7679	4.3363e-06	3.21331e-05	1.99137	C3;C5;Casp3;Casp8;Ccl12;Ccl2;Ccl5;Cd74;Cdk1;Cfp;Faslg;Ifit1bl;Ifng;Ifngr1;Ikbke;Il12b;Il1b;Il6;Irf7;Myd88;Nfkb1;Nfkbia;Oas3;RT1-A1;RT1-A2;RT1-Ba;RT1-Bb;RT1-CE10;RT1-CE3;RT1-CE5;RT1-Da;RT1-Db1;RT1-DMb;RT1-DOa;RT1-DOb;RT1-M2;Socs3;Tap1;Tap2;Tlr2;Tlr9;Tnf;Tnfrsf14;Tnfsf14	rno05168
rno05169	Epstein-Barr virus infection	Human Diseases	Infectious disease: viral	32	893	204	7679	0.0467846	0.159067	1.34888	Ccna2;Cd19;Cd38;Cd40;Cd44;Cdk1;Entpd8;Fgr;Icam1;Ifng;Il10;Itgal;Jak3;Lyn;Nfkb1;Nfkb2;Nfkbia;Nfkbie;Pik3cb;Pik3r3;Polr2i;Relb;RT1-A1;RT1-A2;RT1-CE10;RT1-CE3;RT1-CE5;RT1-M2;Spi1;Spn;Syk;Tnfaip3	rno05169
rno05200	Pathways in cancer	Human Diseases	Cancer: overview	89	893	508	7679	3.22666e-05	0.000200872	1.50654	Adcy7;Adcy8;Arnt2;Bak1;Bdkrb1;Birc3;Birc5;Camk2b;Casp3;Casp8;Ccne1;Cdkn2b;Cebpa;Cks2;Col4a1;Col4a2;Csf2ra;Csf2rb;Csf3r;Cxcr4;E2f1;Ednra;Ednrb;F2r;Faslg;Fgf9;Flt3;Fn1;Fzd5;Gadd45b;Gng4;Gngt2;Gsta2;Gsta3;Gsta4;Gsta5;Gstm1;Gstp1;Hif1a;Hmox1;Ifng;Ifngr1;Igf1;Il12b;Il12rb1;Il15ra;Il23a;Il2ra;Il2rb;Il2rg;Il5ra;Il6;Il7;Itga2;Itga3;Jak3;Kit;Lama1;Lamc2;Met;Mgst3;Mmp2;Mmp9;Nfkb1;Nfkb2;Nfkbia;Nos2;Nqo1;Ntr…	rno05200
rno05202	Transcriptional misregulation in cancers	Human Diseases	Cancer: overview	43	893	168	7679	3.15477e-07	2.86304e-06	2.20096	Arnt2;Bak1;Bcl11b;Bcl2a1;Birc3;Cd14;Cd40;Cebpa;Cebpb;Cebpe;Csf2;Elane;Etv4;Ewsr1;Fcgr1a;Flt3;Gadd45b;Gzmb;Gzmbl2;Hist1h2ail1;Hist1h3a;Hist2h3c2;Igf1;Il1r2;Il2rb;Il6;Itgam;Itgb7;Met;Mmp3;Mmp9;Mycn;Nfkb1;Nfkbiz;Ntrk1;Pax8;Plat;Plau;Prom1;Runx2;Slc45a3;Spi1;Wt1	rno05202
rno05203	Viral carcinogenesis	Human Diseases	Cancer: overview	45	893	201	7679	8.71891e-06	6.14577e-05	1.92517	Bak1;C3;Casp3;Casp8;Ccna2;Ccne1;Ccr3;Ccr4;Ccr5;Ccr8;Cdc20;Cdk1;Cdkn2b;Chek1;Creb3l4;Egr2;Hist1h2ba;Hist1h2bcl1;Hist1h2bd;Hist1h2bf;Hist1h2bk;Hist1h2bl;Hist1h2bo;Hist2h4;Hist2h4a;Hist3h2bb;Hpn;Irf7;Jak3;Lyn;Nfkb1;Nfkb2;Nfkbia;Pik3cb;Pik3r3;Pmaip1;Rbl1;RT1-A1;RT1-A2;RT1-CE10;RT1-CE3;RT1-CE5;RT1-M2;Scin;Syk	rno05203
rno05204	Chemical carcinogenesis	Human Diseases	Cancer: overview	13	893	85	7679	0.184006	0.474801	1.31516	Aldh1a3;Cyp1b1;Cyp2c11;Gsta2;Gsta3;Gsta4;Gsta5;Gstm1;Gstp1;Mgst3;RGD1559459;Ugt1a7c;Ugt2b7	rno05204
rno05205	Proteoglycans in cancer	Human Diseases	Cancer: overview	28	893	198	7679	0.157256	0.423562	1.21603	Camk2b;Casp3;Cd44;Faslg;Fn1;Fzd5;Hbegf;Hcls1;Hif1a;Hpse;Igf1;Il12b;Itga2;Itga5;Met;Mmp2;Mmp9;Msn;Pik3cb;Pik3r3;Plau;Plaur;Ptpn6;Tgfb1;Thbs1;Tlr2;Tnf;Vegfa	rno05205
rno05206	MicroRNAs in cancer	Human Diseases	Cancer: overview	26	893	141	7679	0.0110529	0.04499	1.58565	Abcb1b;Bak1;Brca1;Casp3;Ccne1;Cd44;Cdc25c;Cdca5;Cyp1b1;Dnmt3b;E2f1;Hmox1;Itga5;Kif23;Met;Mmp9;Nfkb1;Pim1;Plau;Serpinb5;Slc45a3;Slc7a1;St14;Thbs1;Tnn;Vegfa	rno05206
rno05210	Colorectal cancer	Human Diseases	Cancer: specific types	12	893	86	7679	0.2952	0.677086	1.19987	Areg;Bak1;Birc5;Casp3;Ereg;Gadd45b;Pik3cb;Pik3r3;Pmaip1;Rac2;Tgfa;Tgfb1	rno05210
rno05211	Renal cell carcinoma	Human Diseases	Cancer: specific types	9	893	66	7679	0.358882	0.751101	1.17261	Arnt2;Hif1a;Met;Pik3cb;Pik3r3;Slc2a1;Tgfa;Tgfb1;Vegfa	rno05211
rno05212	Pancreatic cancer	Human Diseases	Cancer: specific types	11	893	74	7679	0.237438	0.591549	1.27825	Bak1;E2f1;Gadd45b;Nfkb1;Pik3cb;Pik3r3;Rac2;Rad51;Tgfa;Tgfb1;Vegfa	rno05212
rno05213	Endometrial cancer	Human Diseases	Cancer: specific types	4	893	57	7679	0.911339	1	0.603446	Bak1;Gadd45b;Pik3cb;Pik3r3	rno05213
rno05214	Glioma	Human Diseases	Cancer: specific types	8	893	71	7679	0.593582	1	0.968913	Bak1;Camk2b;E2f1;Gadd45b;Igf1;Pik3cb;Pik3r3;Tgfa	rno05214
rno05215	Prostate cancer	Human Diseases	Cancer: specific types	16	893	96	7679	0.086887	0.275938	1.43318	Ccne1;Creb3l4;E2f1;Gstp1;Igf1;Il1r2;Insrr;Mmp3;Mmp9;Nfkb1;Nfkbia;Pik3cb;Pik3r3;Plat;Plau;Tgfa	rno05215
rno05216	Thyroid cancer	Human Diseases	Cancer: specific types	6	893	37	7679	0.25583	0.616124	1.39445	Bak1;Gadd45b;Ntrk1;Pax8;Ret;Tpm3	rno05216
rno05217	Basal cell carcinoma	Human Diseases	Cancer: specific types	3	893	60	7679	0.976632	1	0.429955	Bak1;Fzd5;Gadd45b	rno05217
rno05218	Melanoma	Human Diseases	Cancer: specific types	8	893	72	7679	0.609946	1	0.955456	Bak1;E2f1;Fgf9;Gadd45b;Igf1;Met;Pik3cb;Pik3r3	rno05218
rno05219	Bladder cancer	Human Diseases	Cancer: specific types	6	893	40	7679	0.318861	0.705113	1.28987	E2f1;Hbegf;Mmp2;Mmp9;Thbs1;Vegfa	rno05219
rno05220	Chronic myeloid leukemia	Human Diseases	Cancer: specific types	8	893	77	7679	0.686281	1	0.893413	Bak1;E2f1;Gadd45b;Nfkb1;Nfkbia;Pik3cb;Pik3r3;Tgfb1	rno05220
rno05221	Acute myeloid leukemia	Human Diseases	Cancer: specific types	14	893	66	7679	0.0177674	0.0666855	1.82405	Bcl2a1;Cd14;Cebpa;Cebpe;Csf2;Fcgr1a;Flt3;Itgam;Kit;Nfkb1;Pik3cb;Pik3r3;Pim1;Spi1	rno05221
rno05222	Small cell lung cancer	Human Diseases	Cancer: specific types	20	893	91	7679	0.00340524	0.0153768	1.88991	Bak1;Birc3;Casp3;Ccne1;Cdkn2b;Cks2;Col4a1;Col4a2;E2f1;Fn1;Gadd45b;Itga2;Itga3;Lama1;Lamc2;Nfkb1;Nfkbia;Nos2;Pik3cb;Pik3r3	rno05222
rno05223	Non-small cell lung cancer	Human Diseases	Cancer: specific types	7	893	66	7679	0.660061	1	0.912026	Bak1;E2f1;Gadd45b;Jak3;Pik3cb;Pik3r3;Tgfa	rno05223
rno05224	Breast cancer	Human Diseases	Cancer: specific types	14	893	145	7679	0.80855	1	0.830258	Bak1;Brca1;E2f1;Fgf9;Fzd5;Gadd45b;Igf1;Kit;Nfkb2;Peg12;Pgr;Pik3cb;Pik3r3;Tnfsf11	rno05224
rno05225	Hepatocellular carcinoma	Human Diseases	Cancer: specific types	20	893	169	7679	0.502909	0.938989	1.01765	Bak1;E2f1;Fzd5;Gadd45b;Gsta2;Gsta3;Gsta4;Gsta5;Gstm1;Gstp1;Hmox1;Met;Mgst3;Nqo1;Peg12;Pik3cb;Pik3r3;Tgfa;Tgfb1;Txnrd1	rno05225
rno05226	Gastric cancer	Human Diseases	Cancer: specific types	14	893	147	7679	0.823994	1	0.818962	Abcb1b;Bak1;Ccne1;Cdh17;Cdkn2b;E2f1;Fgf9;Fzd5;Gadd45b;Met;Peg12;Pik3cb;Pik3r3;Tgfb1	rno05226
rno05230	Central carbon metabolism in cancer	Human Diseases	Cancer: overview	15	893	61	7679	0.00347715	0.01546	2.11453	Flt3;G6pd;Hif1a;Hk2;Hk3;Kit;Ldha;Met;Ntrk1;Pik3cb;Pik3r3;Ret;Slc16a3;Slc2a1;Slc7a5	rno05230
rno05231	Choline metabolism in cancer	Human Diseases	Cancer: overview	8	893	97	7679	0.890485	1	0.709204	Hif1a;Pcyt1b;Pik3cb;Pik3r3;Pla2g4f;Rac2;Slc44a4;Was	rno05231
rno05310	Asthma	Human Diseases	Immune disease	13	893	24	7679	4.77198e-07	4.1791e-06	4.65785	Cd40;Cd40lg;Fcer1g;Il10;Ms4a2;RT1-Ba;RT1-Bb;RT1-Da;RT1-Db1;RT1-DMb;RT1-DOa;RT1-DOb;Tnf	rno05310
rno05320	Autoimmune thyroid disease	Human Diseases	Immune disease	24	893	60	7679	1.61941e-08	2.03483e-07	3.43964	Cd28;Cd40;Cd40lg;Cd80;Ctla4;Faslg;Gzmb;Gzmbl2;Il10;Prf1;RT1-A1;RT1-A2;RT1-Ba;RT1-Bb;RT1-CE10;RT1-CE3;RT1-CE5;RT1-Da;RT1-Db1;RT1-DMb;RT1-DOa;RT1-DOb;RT1-M2;Tg	rno05320
rno05321	Inflammatiory bowel disease (IBD)	Human Diseases	Immune disease	30	893	59	7679	1.23881e-13	5.11453e-12	4.37243	Ifng;Ifngr1;Il10;Il12b;Il12rb1;Il17a;Il17f;Il18;Il18rap;Il1a;Il1b;Il21r;Il22;Il23a;Il2rg;Il6;Nfkb1;RT1-Ba;RT1-Bb;RT1-Da;RT1-Db1;RT1-DMb;RT1-DOa;RT1-DOb;Stat4;Tbx21;Tgfb1;Tlr2;Tlr5;Tnf	rno05321
rno05322	Systemic lupus erythematosus	Human Diseases	Immune disease	43	893	91	7679	1.88343e-17	1.36078e-15	4.06331	C1qa;C1qb;C1s;C2;C3;C5;Cd28;Cd40;Cd40lg;Cd80;Elane;Fcgr1a;Fcgr2a;Fcgr3a;H2afx;Hist1h2ac;Hist1h2ah;Hist1h2ai;Hist1h2ail1;Hist1h2ak;Hist1h2an;Hist1h2ba;Hist1h2bcl1;Hist1h2bd;Hist1h2bf;Hist1h2bk;Hist1h2bl;Hist1h2bo;Hist1h3a;Hist2h3c2;Hist2h4;Hist2h4a;Hist3h2bb;Ifng;Il10;RT1-Ba;RT1-Bb;RT1-Da;RT1-Db1;RT1-DMb;RT1-DOa;RT1-DOb;Tnf	rno05322
rno05323	Rheumatoid arthritis	Human Diseases	Immune disease	36	893	81	7679	8.72093e-14	4.20058e-12	3.82182	Acp5;Ccl12;Ccl2;Ccl20;Ccl3;Ccl5;Cd28;Cd80;Csf2;Ctla4;Cxcl6;Icam1;Ifng;Il11;Il17a;Il18;Il1a;Il1b;Il23a;Il6;Itgal;Itgb2;Ltb;Mmp3;RT1-Ba;RT1-Bb;RT1-Da;RT1-Db1;RT1-DMb;RT1-DOa;RT1-DOb;Tgfb1;Tlr2;Tnf;Tnfsf11;Vegfa	rno05323
rno05330	Allograft rejection	Human Diseases	Immune disease	25	893	53	7679	1.15335e-10	2.38085e-09	4.05618	Cd28;Cd40;Cd40lg;Cd80;Faslg;Gzmb;Gzmbl2;Ifng;Il10;Il12b;Prf1;RT1-A1;RT1-A2;RT1-Ba;RT1-Bb;RT1-CE10;RT1-CE3;RT1-CE5;RT1-Da;RT1-Db1;RT1-DMb;RT1-DOa;RT1-DOb;RT1-M2;Tnf	rno05330
rno05332	Graft-versus-host disease	Human Diseases	Immune disease	25	893	51	7679	3.98353e-11	9.59366e-10	4.21525	Cd28;Cd80;Faslg;Gzmb;Gzmbl2;Ifng;Il1a;Il1b;Il6;Klrc1;Prf1;RT1-A1;RT1-A2;RT1-Ba;RT1-Bb;RT1-CE10;RT1-CE3;RT1-CE5;RT1-Da;RT1-Db1;RT1-DMb;RT1-DOa;RT1-DOb;RT1-M2;Tnf	rno05332
rno05340	Primary immunodeficiency	Human Diseases	Immune disease	18	893	36	7679	1.50709e-08	2.00819e-07	4.29955	Btk;Cd19;Cd3d;Cd3e;Cd40;Cd40lg;Cd8a;Cd8b;Ciita;Icos;Il2rg;Jak3;Lck;Ptprc;Tap1;Tap2;Ung;Zap70	rno05340
rno05410	Hypertrophic cardiomyopathy (HCM)	Human Diseases	Cardiovascular disease	14	893	86	7679	0.12065	0.355795	1.39985	Cacng7;Igf1;Il6;Itga2;Itga3;Itga4;Itga5;Itga8;Itgb7;Sgcg;Tgfb1;Tnf;Tpm3;Tpm4	rno05410
rno05412	Arrhythmogenic right ventricular cardiomyopathy (ARVC)	Human Diseases	Cardiovascular disease	11	893	72	7679	0.210606	0.533904	1.31375	Actn2;Cacng7;Dsc2;Gja1;Itga2;Itga3;Itga4;Itga5;Itga8;Itgb7;Sgcg	rno05412
rno05414	Dilated cardiomyopathy (DCM)	Human Diseases	Cardiovascular disease	15	893	88	7679	0.0817687	0.262568	1.46576	Adcy7;Adcy8;Cacng7;Igf1;Itga2;Itga3;Itga4;Itga5;Itga8;Itgb7;Sgcg;Tgfb1;Tnf;Tpm3;Tpm4	rno05414
rno05416	Viral myocarditis	Human Diseases	Cardiovascular disease	27	893	73	7679	1.52873e-08	2.00819e-07	3.18049	Casp3;Casp8;Cd28;Cd40;Cd40lg;Cd55;Cd80;Cxadr;Icam1;Itgal;Itgb2;Prf1;Rac2;RT1-A1;RT1-A2;RT1-Ba;RT1-Bb;RT1-CE10;RT1-CE3;RT1-CE5;RT1-Da;RT1-Db1;RT1-DMb;RT1-DOa;RT1-DOb;RT1-M2;Sgcg	rno05416
rno05418	Fluid shear stress and atherosclerosis	Human Diseases	Cardiovascular disease	31	893	141	7679	0.000302398	0.00171359	1.89058	Ass1;Bmpr1b;Ccl12;Ccl2;Cyba;Gsta2;Gsta3;Gsta4;Gsta5;Gstm1;Gstp1;Hmox1;Icam1;Ifng;Il1a;Il1b;Il1r2;Mgst3;Mmp2;Mmp9;Ncf1;Ncf2;Nfkb1;Nqo1;Pik3cb;Pik3r3;Plat;Rac2;Tnf;Txn1;Vegfa	rno05418

## Sheet: up-regulated (SSCI–3 vs. sham)
id	Term	Classification_level1	Classification_level2	ListHits	ListTotal	PopHits	PopTotal	p-value	q-value	Enrichment_score	Gene	hyperlink_only_excel
rno00010	Glycolysis / Gluconeogenesis	Metabolism	Carbohydrate metabolism	1	94	64	7679	0.546854	0.899545	1.27643	Hk3	rno00010
rno00040	Pentose and glucuronate interconversions	Metabolism	Carbohydrate metabolism	1	94	33	7679	0.33456	0.87243	2.4755	Ugt1a7c	rno00040
rno00051	Fructose and mannose metabolism	Metabolism	Carbohydrate metabolism	1	94	34	7679	0.342741	0.87243	2.40269	Hk3	rno00051
rno00052	Galactose metabolism	Metabolism	Carbohydrate metabolism	1	94	30	7679	0.309408	0.87243	2.72305	Hk3	rno00052
rno00053	Ascorbate and aldarate metabolism	Metabolism	Carbohydrate metabolism	1	94	26	7679	0.274403	0.87243	3.14198	Ugt1a7c	rno00053
rno00061	Fatty acid biosynthesis	Metabolism	Lipid metabolism	1	94	13	7679	0.148064	0.87243	6.28396	Acsbg2	rno00061
rno00071	Fatty acid degradation	Metabolism	Lipid metabolism	2	94	44	7679	0.100799	0.846229	3.71325	Acaa1b;Acsbg2	rno00071
rno00140	Steroid hormone biosynthesis	Metabolism	Lipid metabolism	3	94	75	7679	0.0638437	0.846229	3.26766	Akr1c3;Cyp11b2;Ugt1a7c	rno00140
rno00220	Arginine biosynthesis	Metabolism	Amino acid metabolism	1	94	19	7679	0.208871	0.87243	4.29955	Arg2	rno00220
rno00230	Purine metabolism	Metabolism	Nucleotide metabolism	2	94	169	7679	0.617096	0.899545	0.966763	Entpd8;Polr2i	rno00230
rno00240	Pyrimidine metabolism	Metabolism	Nucleotide metabolism	2	94	96	7679	0.329134	0.87243	1.70191	Entpd8;Polr2i	rno00240
rno00280	Valine, leucine and isoleucine degradation	Metabolism	Amino acid metabolism	2	94	53	7679	0.137039	0.87243	3.0827	Acaa1b;Aox2	rno00280
rno00330	Arginine and proline metabolism	Metabolism	Amino acid metabolism	3	94	48	7679	0.020656	0.601791	5.10572	Aoc1;Arg2;P4ha3	rno00330
rno00340	Histidine metabolism	Metabolism	Amino acid metabolism	1	94	23	7679	0.247003	0.87243	3.5518	Aoc1	rno00340
rno00350	Tyrosine metabolism	Metabolism	Amino acid metabolism	1	94	38	7679	0.374481	0.899545	2.14978	Aox2	rno00350
rno00380	Tryptophan metabolism	Metabolism	Amino acid metabolism	2	94	45	7679	0.104678	0.846229	3.63073	Aoc1;Aox2	rno00380
rno00480	Glutathione metabolism	Metabolism	Metabolism of other amino acids	1	94	58	7679	0.51181	0.899545	1.40847	Nat8f4	rno00480
rno00500	Starch and sucrose metabolism	Metabolism	Carbohydrate metabolism	1	94	29	7679	0.300816	0.87243	2.81695	Hk3	rno00500
rno00510	N-Glycan biosynthesis	Metabolism	Glycan biosynthesis and metabolism	1	94	48	7679	0.44735	0.899545	1.70191	Mgat5b	rno00510
rno00515	Mannose type O-glycan biosyntheis	Metabolism	Glycan biosynthesis and metabolism	1	94	23	7679	0.247003	0.87243	3.5518	Mgat5b	rno00515
rno00520	Amino sugar and nucleotide sugar metabolism	Metabolism	Carbohydrate metabolism	1	94	47	7679	0.440458	0.899545	1.73812	Hk3	rno00520
rno00561	Glycerolipid metabolism	Metabolism	Lipid metabolism	1	94	61	7679	0.529655	0.899545	1.3392	Plpp4	rno00561
rno00564	Glycerophospholipid metabolism	Metabolism	Lipid metabolism	1	94	96	7679	0.695726	0.899545	0.850953	Plpp4	rno00564
rno00565	Ether lipid metabolism	Metabolism	Lipid metabolism	2	94	45	7679	0.104678	0.846229	3.63073	Pafah1b3;Pla2g7	rno00565
rno00592	alpha-Linolenic acid metabolism	Metabolism	Lipid metabolism	1	94	23	7679	0.247003	0.87243	3.5518	Acaa1b	rno00592
rno00600	Sphingolipid metabolism	Metabolism	Lipid metabolism	1	94	49	7679	0.454158	0.899545	1.66717	Acer1	rno00600
rno00750	Vitamin B6 metabolism	Metabolism	Metabolism of cofactors and vitamins	1	94	10	7679	0.115948	0.846229	8.16915	Aox2	rno00750
rno00760	Nicotinate and nicotinamide metabolism	Metabolism	Metabolism of cofactors and vitamins	1	94	32	7679	0.326278	0.87243	2.55286	Aox2	rno00760
rno00830	Retinol metabolism	Metabolism	Metabolism of cofactors and vitamins	3	94	80	7679	0.0744237	0.846229	3.06343	Aldh1a7;Aox2;Ugt1a7c	rno00830
rno00860	Porphyrin and chlorophyll metabolism	Metabolism	Metabolism of cofactors and vitamins	1	94	40	7679	0.389778	0.899545	2.04229	Ugt1a7c	rno00860
rno00980	Metabolism of xenobiotics by cytochrome P450	Metabolism	Xenobiotics biodegradation and metabolism	2	94	64	7679	0.184434	0.87243	2.55286	Akr7a3;Ugt1a7c	rno00980
rno00982	Drug metabolism - cytochrome P450	Metabolism	Xenobiotics biodegradation and metabolism	2	94	65	7679	0.18886	0.87243	2.51358	Aox2;Ugt1a7c	rno00982
rno00983	Drug metabolism - other enzymes	Metabolism	Xenobiotics biodegradation and metabolism	3	94	83	7679	0.0811229	0.846229	2.9527	Ces2;Ces2h;Ugt1a7c	rno00983
rno01040	Biosynthesis of unsaturated fatty acids	Metabolism	Lipid metabolism	1	94	26	7679	0.274403	0.87243	3.14198	Acaa1b	rno01040
rno02010	ABC transporters	Environmental Information Processing	Membrane transport	2	94	47	7679	0.112556	0.846229	3.47623	Abcb1b;Tap2	rno02010
rno03020	RNA polymerase	Genetic Information Processing	Transcription	1	94	28	7679	0.292119	0.87243	2.91755	Polr2i	rno03020
rno03320	PPAR signaling pathway	Organismal Systems	Endocrine system	2	94	79	7679	0.251953	0.87243	2.06814	Acaa1b;Acsbg2	rno03320
rno04010	MAPK signaling pathway	Environmental Information Processing	Signal transduction	6	94	288	7679	0.140716	0.87243	1.70191	Angpt4;Bdnf;Cacna1s;Dusp9;Il1a;Rasgrf1	rno04010
rno04014	Ras signaling pathway	Environmental Information Processing	Signal transduction	3	94	227	7679	0.529393	0.899545	1.07962	Angpt4;Bdnf;Rasgrf1	rno04014
rno04015	Rap1 signaling pathway	Environmental Information Processing	Signal transduction	2	94	205	7679	0.720673	0.899545	0.79699	Angpt4;Thbs1	rno04015
rno04020	Calcium signaling pathway	Environmental Information Processing	Signal transduction	4	94	182	7679	0.183316	0.87243	1.79542	Cacna1s;Cysltr2;Grpr;P2rx5	rno04020
rno04022	cGMP - PKG signaling pathway	Environmental Information Processing	Signal transduction	2	94	164	7679	0.600623	0.899545	0.996238	Adra2c;Cacna1s	rno04022
rno04024	cAMP signaling pathway	Environmental Information Processing	Signal transduction	5	94	194	7679	0.0889145	0.846229	2.10545	Bdnf;Cacna1s;Ffar2;Hcn4;Tshr	rno04024
rno04060	Cytokine-cytokine receptor interaction	Environmental Information Processing	Signaling molecules and interaction	10	94	240	7679	0.000665371	0.111782	3.40381	Bmpr1b;Ccl9;Cd27;Cxcl1;Cxcr4;Il1a;Il20ra;Inhbb;Ltb;Xcr1	rno04060
rno04062	Chemokine signaling pathway	Organismal Systems	Immune system	4	94	172	7679	0.159378	0.87243	1.8998	Ccl9;Cxcl1;Cxcr4;Xcr1	rno04062
rno04064	NF-kappa B signaling pathway	Environmental Information Processing	Signal transduction	1	94	89	7679	0.667979	0.899545	0.917882	Ltb	rno04064
rno04066	HIF-1 signaling pathway	Environmental Information Processing	Signal transduction	2	94	99	7679	0.342597	0.87243	1.65033	Angpt4;Hk3	rno04066
rno04071	Sphingolipid signaling pathway	Environmental Information Processing	Signal transduction	3	94	119	7679	0.178445	0.87243	2.05945	Acer1;Fcer1a;Ms4a2	rno04071
rno04072	Phospholipase D signaling pathway	Environmental Information Processing	Signal transduction	2	94	146	7679	0.537039	0.899545	1.11906	Fcer1a;Ms4a2	rno04072
rno04080	Neuroactive ligand-receptor interaction	Environmental Information Processing	Signaling molecules and interaction	10	94	313	7679	0.00476002	0.266561	2.60995	Adra2c;Cysltr2;Glp2r;Glra1;Grid1;Grpr;Npy4r;Ntsr2;P2rx5;Tshr	rno04080
rno04110	Cell cycle	Cellular Processes	Cell growth and death	1	94	123	7679	0.782856	0.899545	0.664158	Cdc6	rno04110
rno04114	Oocyte meiosis	Cellular Processes	Cell growth and death	1	94	112	7679	0.750826	0.899545	0.729388	Cpeb1	rno04114
rno04115	p53 signaling pathway	Cellular Processes	Cell growth and death	1	94	66	7679	0.557973	0.899545	1.23775	Thbs1	rno04115
rno04142	Lysosome	Cellular Processes	Transport and catabolism	1	94	125	7679	0.788226	0.899545	0.653532	Dnase2b	rno04142
rno04144	Endocytosis	Cellular Processes	Transport and catabolism	2	94	256	7679	0.826629	0.899545	0.638215	Cxcr4;Ehd3	rno04144
rno04145	Phagosome	Cellular Processes	Transport and catabolism	3	94	169	7679	0.3422	0.87243	1.45014	Tap2;Thbs1;Tubb3	rno04145
rno04146	Peroxisome	Cellular Processes	Transport and catabolism	1	94	81	7679	0.633193	0.899545	1.00854	Acaa1b	rno04146
rno04150	mTOR signaling pathway	Environmental Information Processing	Signal transduction	1	94	150	7679	0.845225	0.899545	0.54461	Fzd5	rno04150
rno04151	PI3K-Akt signaling pathway	Environmental Information Processing	Signal transduction	7	94	335	7679	0.115466	0.846229	1.70699	Angpt4;Bdnf;Fn1;Itga8;Lama1;Thbs1;Tnn	rno04151
rno04217	Necroptosis	Cellular Processes	Cell growth and death	1	94	145	7679	0.835194	0.899545	0.56339	Il1a	rno04217
rno04218	Cellular senescence	Cellular Processes	Cell growth and death	1	94	173	7679	0.884117	0.900192	0.472205	Il1a	rno04218
rno04260	Cardiac muscle contraction	Organismal Systems	Circulatory system	2	94	75	7679	0.233778	0.87243	2.17844	Cacna1s;Myl4	rno04260
rno04261	Adrenergic signaling in cardiomyocytes	Organismal Systems	Circulatory system	3	94	143	7679	0.255076	0.87243	1.71381	Cacna1s;Myl4;Scn5a	rno04261
rno04270	Vascular smooth muscle contraction	Organismal Systems	Circulatory system	1	94	130	7679	0.801082	0.899545	0.628396	Cacna1s	rno04270
rno04310	Wnt signaling pathway	Environmental Information Processing	Signal transduction	1	94	143	7679	0.831004	0.899545	0.571269	Fzd5	rno04310
rno04350	TGF-beta signaling pathway	Environmental Information Processing	Signal transduction	3	94	84	7679	0.0834125	0.846229	2.91755	Bmpr1b;Inhbb;Thbs1	rno04350
rno04360	Axon guidance	Organismal Systems	Development and regeneration	3	94	175	7679	0.362383	0.899545	1.40043	Bmpr1b;Cxcr4;Rnd1	rno04360
rno04371	Apelin signaling pathway	Environmental Information Processing	Signal transduction	1	94	134	7679	0.810808	0.899545	0.609638	Myl4	rno04371
rno04380	Osteoclast differentiation	Organismal Systems	Development and regeneration	2	94	122	7679	0.442291	0.899545	1.3392	Il1a;Lilrb4	rno04380
rno04390	Hippo signaling pathway	Environmental Information Processing	Signal transduction	2	94	152	7679	0.558973	0.899545	1.07489	Bmpr1b;Fzd5	rno04390
rno04510	Focal adhesion	Cellular Processes	Cellular community - eukaryotes	6	94	196	7679	0.0326863	0.618583	2.50076	Fn1;Itga8;Lama1;Rasgrf1;Thbs1;Tnn	rno04510
rno04512	ECM-receptor interaction	Environmental Information Processing	Signaling molecules and interaction	5	94	82	7679	0.00320763	0.266561	4.98119	Fn1;Itga8;Lama1;Thbs1;Tnn	rno04512
rno04514	Cell adhesion molecules (CAMs)	Environmental Information Processing	Signaling molecules and interaction	2	94	155	7679	0.569664	0.899545	1.05408	Cldn2;Itga8	rno04514
rno04530	Tight junction	Cellular Processes	Cellular community - eukaryotes	4	94	165	7679	0.143378	0.87243	1.9804	Cldn2;Micall2;Myh1;Myh2	rno04530
rno04540	Gap junction	Cellular Processes	Cellular community - eukaryotes	1	94	86	7679	0.655334	0.899545	0.949901	Tubb3	rno04540
rno04550	Signaling pathways regulating pluripotency of stem cells	Cellular Processes	Cellular community - eukaryotes	5	94	135	7679	0.024628	0.601791	3.02561	Bmpr1b;Dusp9;Fzd5;Inhbb;Pcgf1	rno04550
rno04612	Antigen processing and presentation	Organismal Systems	Immune system	2	94	78	7679	0.247404	0.87243	2.09465	Klrc2;Tap2	rno04612
rno04614	Renin-angiotensin system	Organismal Systems	Endocrine system	3	94	35	7679	0.00875847	0.367856	7.00213	Cma1;Cpa3;Mcpt1l1	rno04614
rno04621	NOD-like receptor signaling pathway	Organismal Systems	Immune system	1	94	154	7679	0.852812	0.899545	0.530464	Cxcl1	rno04621
rno04625	C-type lectin receptor signaling pathway	Organismal Systems	Immune system	2	94	108	7679	0.382442	0.899545	1.51281	Clec4d;Clec4e	rno04625
rno04630	Jak-STAT signaling pathway	Environmental Information Processing	Signal transduction	2	94	151	7679	0.555368	0.899545	1.08201	Aox2;Il20ra	rno04630
rno04640	Hematopoietic cell lineage	Organismal Systems	Immune system	2	94	87	7679	0.288381	0.87243	1.87797	Cd3e;Il1a	rno04640
rno04650	Natural killer cell mediated cytotoxicity	Organismal Systems	Immune system	1	94	125	7679	0.788226	0.899545	0.653532	Klrc2	rno04650
rno04657	IL-17 signaling pathway	Organismal Systems	Immune system	4	94	91	7679	0.0250746	0.601791	3.59083	Cxcl1;Mmp13;S100a8;S100a9	rno04657
rno04658	Th1 and Th2 cell differentiation	Organismal Systems	Immune system	1	94	88	7679	0.663816	0.899545	0.928312	Cd3e	rno04658
rno04659	Th17 cell differentiation	Organismal Systems	Immune system	1	94	102	7679	0.717674	0.899545	0.800897	Cd3e	rno04659
rno04660	T cell receptor signaling pathway	Organismal Systems	Immune system	1	94	101	7679	0.714128	0.899545	0.808827	Cd3e	rno04660
rno04664	Fc epsilon RI signaling pathway	Organismal Systems	Immune system	2	94	65	7679	0.18886	0.87243	2.51358	Fcer1a;Ms4a2	rno04664
rno04668	TNF signaling pathway	Environmental Information Processing	Signal transduction	1	94	106	7679	0.731428	0.899545	0.770674	Cxcl1	rno04668
rno04670	Leukocyte transendothelial migration	Organismal Systems	Immune system	2	94	113	7679	0.404149	0.899545	1.44587	Cldn2;Cxcr4	rno04670
rno04672	Intestinal immune network for IgA production	Organismal Systems	Immune system	1	94	42	7679	0.404704	0.899545	1.94504	Cxcr4	rno04672
rno04722	Neurotrophin signaling pathway	Organismal Systems	Nervous system	1	94	119	7679	0.77171	0.899545	0.686483	Bdnf	rno04722
rno04723	Retrograde endocannabinoid signaling	Organismal Systems	Nervous system	1	94	138	7679	0.820063	0.899545	0.591967	Cacna1s	rno04723
rno04725	Cholinergic synapse	Organismal Systems	Nervous system	1	94	111	7679	0.747692	0.899545	0.735959	Cacna1s	rno04725
rno04726	Serotonergic synapse	Organismal Systems	Nervous system	1	94	119	7679	0.77171	0.899545	0.686483	Cacna1s	rno04726
rno04727	GABAergic synapse	Organismal Systems	Nervous system	1	94	87	7679	0.659601	0.899545	0.938983	Cacna1s	rno04727
rno04740	Olfactory transduction	Organismal Systems	Sensory system	3	94	1088	7679	0.999927	0.999927	0.225252	Olr1372;Olr59;Or10ad1	rno04740
rno04742	Taste transduction	Organismal Systems	Sensory system	1	94	86	7679	0.655334	0.899545	0.949901	Hcn4	rno04742
rno04810	Regulation of actin cytoskeleton	Cellular Processes	Cell motility	4	94	208	7679	0.250317	0.87243	1.57099	Diaph3;Fn1;Itga8;Itgad	rno04810
rno04910	Insulin signaling pathway	Organismal Systems	Endocrine system	1	94	134	7679	0.810808	0.899545	0.609638	Hk3	rno04910
rno04911	Insulin secretion	Organismal Systems	Endocrine system	1	94	85	7679	0.651015	0.899545	0.961076	Cacna1s	rno04911
rno04912	GnRH signaling pathway	Organismal Systems	Endocrine system	1	94	89	7679	0.667979	0.899545	0.917882	Cacna1s	rno04912
rno04914	Progesterone-mediated oocyte maturation	Organismal Systems	Endocrine system	1	94	88	7679	0.663816	0.899545	0.928312	Cpeb1	rno04914
rno04915	Estrogen signaling pathway	Organismal Systems	Endocrine system	1	94	130	7679	0.801082	0.899545	0.628396	Krt23	rno04915
rno04916	Melanogenesis	Organismal Systems	Endocrine system	1	94	98	7679	0.703223	0.899545	0.833587	Fzd5	rno04916
rno04918	Thyroid hormone synthesis	Organismal Systems	Endocrine system	1	94	72	7679	0.589736	0.899545	1.1346	Tshr	rno04918
rno04920	Adipocytokine signaling pathway	Organismal Systems	Endocrine system	1	94	71	7679	0.584604	0.899545	1.15058	Acsbg2	rno04920
rno04921	Oxytocin signaling pathway	Organismal Systems	Endocrine system	1	94	152	7679	0.849066	0.899545	0.537444	Cacna1s	rno04921
rno04923	Regulation of lipolysis in adipocyte	Organismal Systems	Endocrine system	1	94	55	7679	0.493296	0.899545	1.4853	Tshr	rno04923
rno04924	Renin secretion	Organismal Systems	Endocrine system	1	94	68	7679	0.568822	0.899545	1.20135	Cacna1s	rno04924
rno04925	Aldosterone synthesis and secretion	Organismal Systems	Endocrine system	1	94	94	7679	0.688041	0.899545	0.869058	Cacna1s	rno04925
rno04926	Relaxin signaling pathway	Organismal Systems	Endocrine system	1	94	126	7679	0.790861	0.899545	0.648345	Mmp13	rno04926
rno04927	Cortisol synthesis and secretion	Organismal Systems	Endocrine system	2	94	63	7679	0.180024	0.87243	2.59338	Cacna1s;Cyp11b2	rno04927
rno04930	Type II diabetes mellitus	Human Diseases	Endocrine and metabolic disease	1	94	47	7679	0.440458	0.899545	1.73812	Hk3	rno04930
rno04932	Non-alcoholic fatty liver disease (NAFLD)	Human Diseases	Endocrine and metabolic disease	1	94	145	7679	0.835194	0.899545	0.56339	Il1a	rno04932
rno04933	AGE-RAGE signaling pathway in diabetic complications	Human Diseases	Endocrine and metabolic disease	3	94	99	7679	0.12089	0.846229	2.4755	Fn1;Il1a;Nox4	rno04933
rno04934	Cushing's syndrome	Human Diseases	Endocrine and metabolic disease	3	94	153	7679	0.288362	0.87243	1.60179	Cacna1s;Cyp11b2;Fzd5	rno04934
rno04940	Type I diabetes mellitus	Human Diseases	Endocrine and metabolic disease	3	94	60	7679	0.0368204	0.618583	4.08457	Il1a;Ptprn;Ptprn2	rno04940
rno04961	Endocrine and other factor-regulated calcium reabsorption	Organismal Systems	Excretory system	1	94	52	7679	0.474087	0.899545	1.57099	Calb1	rno04961
rno04972	Pancreatic secretion	Organismal Systems	Digestive system	1	94	98	7679	0.703223	0.899545	0.833587	Cpa3	rno04972
rno04973	Carbohydrate digestion and absorption	Organismal Systems	Digestive system	1	94	39	7679	0.382176	0.899545	2.09465	Hk3	rno04973
rno04974	Protein digestion and absorption	Organismal Systems	Digestive system	1	94	87	7679	0.659601	0.899545	0.938983	Cpa3	rno04974
rno04976	Bile secretion	Organismal Systems	Digestive system	1	94	71	7679	0.584604	0.899545	1.15058	Abcb1b	rno04976
rno05010	Alzheimer's disease	Human Diseases	Neurodegenerative disease	1	94	164	7679	0.870208	0.899545	0.498119	Cacna1s	rno05010
rno05016	Huntington's disease	Human Diseases	Neurodegenerative disease	2	94	181	7679	0.654524	0.899545	0.902668	Bdnf;Polr2i	rno05016
rno05020	Prion diseases	Human Diseases	Neurodegenerative disease	1	94	34	7679	0.342741	0.87243	2.40269	Il1a	rno05020
rno05030	Cocaine addiction	Human Diseases	Substance dependence	1	94	47	7679	0.440458	0.899545	1.73812	Bdnf	rno05030
rno05034	Alcoholism	Human Diseases	Substance dependence	1	94	143	7679	0.831004	0.899545	0.571269	Bdnf	rno05034
rno05100	Bacterial invasion of epithelial cells	Human Diseases	Infectious disease: bacterial	1	94	75	7679	0.60476	0.899545	1.08922	Fn1	rno05100
rno05132	Salmonella infection	Human Diseases	Infectious disease: bacterial	2	94	80	7679	0.256505	0.87243	2.04229	Cxcl1;Il1a	rno05132
rno05133	Pertussis	Human Diseases	Infectious disease: bacterial	1	94	72	7679	0.589736	0.899545	1.1346	Il1a	rno05133
rno05134	Legionellosis	Human Diseases	Infectious disease: bacterial	1	94	53	7679	0.480568	0.899545	1.54135	Cxcl1	rno05134
rno05140	Leishmaniasis	Human Diseases	Infectious disease: parasitic	1	94	65	7679	0.552448	0.899545	1.25679	Il1a	rno05140
rno05142	Chagas disease (American trypanosomiasis)	Human Diseases	Infectious disease: parasitic	1	94	101	7679	0.714128	0.899545	0.808827	Cd3e	rno05142
rno05144	Malaria	Human Diseases	Infectious disease: parasitic	1	94	52	7679	0.474087	0.899545	1.57099	Thbs1	rno05144
rno05145	Toxoplasmosis	Human Diseases	Infectious disease: parasitic	1	94	107	7679	0.734762	0.899545	0.763472	Lama1	rno05145
rno05146	Amoebiasis	Human Diseases	Infectious disease: parasitic	3	94	96	7679	0.112953	0.846229	2.55286	Arg2;Fn1;Lama1	rno05146
rno05152	Tuberculosis	Human Diseases	Infectious disease: bacterial	2	94	169	7679	0.617096	0.899545	0.966763	Clec4e;Il1a	rno05152
rno05160	Hepatitis C	Human Diseases	Infectious disease: viral	1	94	122	7679	0.780121	0.899545	0.669602	Cldn2	rno05160
rno05162	Measles	Human Diseases	Infectious disease: viral	2	94	125	7679	0.454712	0.899545	1.30706	Cd3e;Il1a	rno05162
rno05164	Influenza A	Human Diseases	Infectious disease: viral	1	94	158	7679	0.860032	0.899545	0.517035	Il1a	rno05164
rno05165	Human papillomavirus infection	Human Diseases	Infectious disease: viral	6	94	327	7679	0.210846	0.87243	1.49893	Fn1;Fzd5;Itga8;Lama1;Thbs1;Tnn	rno05165
rno05166	HTLV-I infection	Human Diseases	Infectious disease: viral	2	94	269	7679	0.847191	0.899545	0.607372	Cd3e;Fzd5	rno05166
rno05167	Kaposi's sarcoma-associated herpesvirus infection	Human Diseases	Infectious disease: viral	1	94	194	7679	0.911094	0.91655	0.42109	Cxcl1	rno05167
rno05168	Herpes simplex infection	Human Diseases	Infectious disease: viral	1	94	190	7679	0.906486	0.91655	0.429955	Tap2	rno05168
rno05169	Epstein-Barr virus infection	Human Diseases	Infectious disease: viral	2	94	204	7679	0.718141	0.899545	0.800897	Entpd8;Polr2i	rno05169
rno05200	Pathways in cancer	Human Diseases	Cancer: overview	4	94	508	7679	0.877443	0.899545	0.64324	Cxcr4;Fn1;Fzd5;Lama1	rno05200
rno05202	Transcriptional misregulation in cancers	Human Diseases	Cancer: overview	1	94	168	7679	0.876583	0.899545	0.486259	Wt1	rno05202
rno05204	Chemical carcinogenesis	Human Diseases	Cancer: overview	1	94	85	7679	0.651015	0.899545	0.961076	Ugt1a7c	rno05204
rno05205	Proteoglycans in cancer	Human Diseases	Cancer: overview	3	94	198	7679	0.438567	0.899545	1.23775	Fn1;Fzd5;Thbs1	rno05205
rno05206	MicroRNAs in cancer	Human Diseases	Cancer: overview	3	94	141	7679	0.248486	0.87243	1.73812	Abcb1b;Thbs1;Tnn	rno05206
rno05217	Basal cell carcinoma	Human Diseases	Cancer: specific types	1	94	60	7679	0.52378	0.899545	1.36152	Fzd5	rno05217
rno05219	Bladder cancer	Human Diseases	Cancer: specific types	1	94	40	7679	0.389778	0.899545	2.04229	Thbs1	rno05219
rno05222	Small cell lung cancer	Human Diseases	Cancer: specific types	2	94	91	7679	0.306547	0.87243	1.79542	Fn1;Lama1	rno05222
rno05224	Breast cancer	Human Diseases	Cancer: specific types	1	94	145	7679	0.835194	0.899545	0.56339	Fzd5	rno05224
rno05225	Hepatocellular carcinoma	Human Diseases	Cancer: specific types	1	94	169	7679	0.878127	0.899545	0.483382	Fzd5	rno05225
rno05226	Gastric cancer	Human Diseases	Cancer: specific types	2	94	147	7679	0.540746	0.899545	1.11145	Abcb1b;Fzd5	rno05226
rno05230	Central carbon metabolism in cancer	Human Diseases	Cancer: overview	1	94	61	7679	0.529655	0.899545	1.3392	Hk3	rno05230
rno05310	Asthma	Human Diseases	Immune disease	2	94	24	7679	0.0343616	0.618583	6.80762	Fcer1a;Ms4a2	rno05310
rno05320	Autoimmune thyroid disease	Human Diseases	Immune disease	1	94	60	7679	0.52378	0.899545	1.36152	Tshr	rno05320
rno05321	Inflammatiory bowel disease (IBD)	Human Diseases	Immune disease	1	94	59	7679	0.517832	0.899545	1.3846	Il1a	rno05321
rno05323	Rheumatoid arthritis	Human Diseases	Immune disease	2	94	81	7679	0.261059	0.87243	2.01707	Il1a;Ltb	rno05323
rno05332	Graft-versus-host disease	Human Diseases	Immune disease	1	94	51	7679	0.467525	0.899545	1.60179	Il1a	rno05332
rno05340	Primary immunodeficiency	Human Diseases	Immune disease	2	94	36	7679	0.0714138	0.846229	4.53842	Cd3e;Tap2	rno05340
rno05410	Hypertrophic cardiomyopathy (HCM)	Human Diseases	Cardiovascular disease	2	94	86	7679	0.283831	0.87243	1.8998	Cacna1s;Itga8	rno05410
rno05412	Arrhythmogenic right ventricular cardiomyopathy (ARVC)	Human Diseases	Cardiovascular disease	2	94	72	7679	0.220204	0.87243	2.26921	Cacna1s;Itga8	rno05412
rno05414	Dilated cardiomyopathy (DCM)	Human Diseases	Cardiovascular disease	2	94	88	7679	0.292929	0.87243	1.85662	Cacna1s;Itga8	rno05414
rno05418	Fluid shear stress and atherosclerosis	Human Diseases	Cardiovascular disease	2	94	141	7679	0.518207	0.899545	1.15874	Bmpr1b;Il1a	rno05418

## Sheet: down-regulated(SSCI–1 vs. sham)
id	Term	Classification_level1	Classification_level2	ListHits	ListTotal	PopHits	PopTotal	p-value	q-value	Enrichment_score	Gene	hyperlink_only_excel
rno00020	Citrate cycle (TCA cycle)	Metabolism	Carbohydrate metabolism	1	327	16	2681	0.875994	0.951838	0.512424	circRNA_2355|Chr15:55485728_55488198_+(Sucla2);	rno00020
rno00030	Pentose phosphate pathway	Metabolism	Carbohydrate metabolism	1	327	6	2681	0.542154	0.819762	1.36646	circRNA_4934|Chr4:171770056_171787877_+(Dera);	rno00030
rno00062	Fatty acid elongation	Metabolism	Lipid metabolism	1	327	9	2681	0.690419	0.902067	0.910975	circRNA_5578|Chr6:27575763_27582987_-(Hadhb);	rno00062
rno00071	Fatty acid degradation	Metabolism	Lipid metabolism	2	327	13	2681	0.483155	0.792626	1.26135	circRNA_5578|Chr6:27575763_27582987_-(Hadhb);circRNA_6373|Chr8:58182482_58182849_-(Acat1);	rno00071
rno00130	Ubiquinone and other terpenoid-quinone biosynthesis	Metabolism	Metabolism of cofactors and vitamins	1	327	5	2681	0.478418	0.792626	1.63976	circRNA_1663|Chr12:47088804_47092139_-(Coq5);	rno00130
rno00190	Oxidative phosphorylation	Metabolism	Energy metabolism	1	327	21	2681	0.93559	0.965666	0.390418	circRNA_0878|Chr10:16769713_16774652_-(Atp6v0e1);	rno00190
rno00220	Arginine biosynthesis	Metabolism	Amino acid metabolism	1	327	5	2681	0.478418	0.792626	1.63976	circRNA_6847|Chr9:54232163_54248877_+(Gls);	rno00220
rno00230	Purine metabolism	Metabolism	Nucleotide metabolism	13	327	57	2681	0.0169513	0.151587	1.8699	circRNA_0380|Chr1:184008119_184017761_+(Pde3b);circRNA_0603|Chr1:238998947_239014340_-(Gda);circRNA_1398|Chr11:68722906_68730129_-(Adcy5);circRNA_1399|Chr11:68745884_68750272_-(Adcy5);circRNA_2141|Chr14:87328008_87331877_+(Adcy1);circRNA_2142|Chr14:87328008_87357732_+(Adcy1);circRNA_2143|Chr14:87328008_87377952_+(Adcy1);circRNA_2144|Chr14:87331763_87357732_+(Adcy1);circRNA_2145|Chr14:87350088_873…	rno00230
rno00240	Pyrimidine metabolism	Metabolism	Nucleotide metabolism	1	327	19	2681	0.916282	0.954512	0.431515	circRNA_1841|Chr13:85401003_85401929_+(Uck2);	rno00240
rno00250	Alanine, aspartate and glutamate metabolism	Metabolism	Amino acid metabolism	1	327	13	2681	0.816404	0.917816	0.630675	circRNA_6847|Chr9:54232163_54248877_+(Gls);	rno00250
rno00270	Cysteine and methionine metabolism	Metabolism	Amino acid metabolism	1	327	8	2681	0.647267	0.882957	1.02485	circRNA_5595|Chr6:28272106_28272697_+(Dnmt3a);	rno00270
rno00280	Valine, leucine and isoleucine degradation	Metabolism	Amino acid metabolism	9	327	35	2681	0.0209822	0.151587	2.10826	circRNA_2416|Chr15:109125713_109141568_+(Pcca);circRNA_2418|Chr15:109127707_109141568_+(Pcca);circRNA_4726|Chr4:82682367_82685493_-(Hibadh);circRNA_5578|Chr6:27575763_27582987_-(Hadhb);circRNA_6373|Chr8:58182482_58182849_-(Acat1);circRNA_6567|Chr8:91509748_91527174_+(Bckdhb);circRNA_6838|Chr9:53459782_53462727_-(Hibch);circRNA_6840|Chr9:53475012_53508890_-(Hibch);circRNA_6841|Chr9:53492939_535088…	rno00280
rno00310	Lysine degradation	Metabolism	Amino acid metabolism	16	327	83	2681	0.0393807	0.241086	1.58049	circRNA_0535|Chr1:219018599_219028923_+(Kmt5b);circRNA_2975|Chr18:48443339_48443646_+(Prdm6);circRNA_2977|Chr18:48443339_48508708_+(Prdm6);circRNA_2978|Chr18:48443339_48521166_+(Prdm6);circRNA_2979|Chr18:48443339_48531023_+(Prdm6);circRNA_3650|Chr2:188269009_188309036_+(Ash1l);circRNA_3651|Chr2:188269009_188330330_+(Ash1l);circRNA_3659|Chr2:188298849_188330330_+(Ash1l);circRNA_3665|Chr2:188337238…	rno00310
rno00380	Tryptophan metabolism	Metabolism	Amino acid metabolism	1	327	7	2681	0.598122	0.856531	1.17125	circRNA_6373|Chr8:58182482_58182849_-(Acat1);	rno00380
rno00410	beta-Alanine metabolism	Metabolism	Metabolism of other amino acids	3	327	11	2681	0.141353	0.43802	2.23603	circRNA_6838|Chr9:53459782_53462727_-(Hibch);circRNA_6840|Chr9:53475012_53508890_-(Hibch);circRNA_6841|Chr9:53492939_53508890_-(Hibch);	rno00410
rno00480	Glutathione metabolism	Metabolism	Metabolism of other amino acids	1	327	15	2681	0.858658	0.937057	0.546585	circRNA_2559|Chr16:62222412_62226174_-(Gsr);	rno00480
rno00500	Starch and sucrose metabolism	Metabolism	Carbohydrate metabolism	1	327	6	2681	0.542154	0.819762	1.36646	circRNA_1287|Chr11:7355304_7362812_+(Gbe1);	rno00500
rno00510	N-Glycan biosynthesis	Metabolism	Glycan biosynthesis and metabolism	2	327	21	2681	0.746087	0.905393	0.780836	circRNA_0269|Chr1:142160925_142161359_-(Man2a2);circRNA_5747|Chr6:100396828_100397255_+(Fut8);	rno00510
rno00512	Mucin type O-glycan biosynthesis	Metabolism	Glycan biosynthesis and metabolism	1	327	10	2681	0.728305	0.905393	0.819878	circRNA_4598|Chr4:33929479_33934304_+(C1galt1);	rno00512
rno00514	Other types of O-glycan biosynthesis	Metabolism	Glycan biosynthesis and metabolism	1	327	9	2681	0.690419	0.902067	0.910975	circRNA_1501|Chr12:6404013_6419916_+(B3glct);	rno00514
rno00515	Mannose type O-glycan biosyntheis	Metabolism	Glycan biosynthesis and metabolism	1	327	14	2681	0.838906	0.927601	0.585627	circRNA_3107|Chr19:12691066_12713398_-(Large1);	rno00515
rno00520	Amino sugar and nucleotide sugar metabolism	Metabolism	Carbohydrate metabolism	2	327	22	2681	0.769312	0.906315	0.745343	circRNA_6732|Chr9:11194239_11209094_-(Uxs1);circRNA_6734|Chr9:11194239_11219449_-(Uxs1);	rno00520
rno00531	Glycosaminoglycan degradation	Metabolism	Glycan biosynthesis and metabolism	2	327	5	2681	0.115529	0.397185	3.27951	circRNA_0725|Chr1:262151915_262176067_-(Hpse2);circRNA_0726|Chr1:262786087_262811422_-(Hpse2);	rno00531
rno00561	Glycerolipid metabolism	Metabolism	Lipid metabolism	4	327	24	2681	0.334849	0.677799	1.36646	circRNA_2364|Chr15:60816746_60821766_-(Dgkh);circRNA_4663|Chr4:64431354_64474930_-(Dgki);circRNA_4664|Chr4:64451679_64474930_-(Dgki);circRNA_5627|Chr6:44055353_44107579_+(Mboat2);	rno00561
rno00562	Inositol phosphate metabolism	Metabolism	Carbohydrate metabolism	9	327	77	2681	0.608649	0.856531	0.958299	circRNA_0389|Chr1:185252579_185264972_+(Pik3c2a);circRNA_0394|Chr1:185263914_185297636_+(Pik3c2a);circRNA_0445|Chr1:200102205_200105174_+(Inpp5f);circRNA_2072|Chr14:60573253_60586776_-(Pi4k2b);circRNA_2832|Chr18:307052_312848_-(Mtmr1);circRNA_3147|Chr19:29642344_29645344_-(Inpp4b);circRNA_3929|Chr20:18467660_18471939_-(Ipmk);circRNA_6804|Chr9:43968846_43977575_+(Inpp4a);circRNA_6920|Chr9:71920586…	rno00562
rno00563	Glycosylphosphatidylinositol(GPI)-anchor biosynthesis	Metabolism	Glycan biosynthesis and metabolism	2	327	7	2681	0.206342	0.5164	2.34251	circRNA_4431|Chr3:150814608_150833140_-(Pigu);circRNA_5073|Chr5:58467569_58467992_-(Pigo);	rno00563
rno00564	Glycerophospholipid metabolism	Metabolism	Lipid metabolism	7	327	42	2681	0.245695	0.565775	1.36646	circRNA_1762|Chr13:67141798_67143114_-(Pla2g4a);circRNA_2364|Chr15:60816746_60821766_-(Dgkh);circRNA_3512|Chr2:113739689_113745181_+(Pld1);circRNA_3515|Chr2:113747182_113764892_+(Pld1);circRNA_4663|Chr4:64431354_64474930_-(Dgki);circRNA_4664|Chr4:64451679_64474930_-(Dgki);circRNA_5627|Chr6:44055353_44107579_+(Mboat2);	rno00564
rno00565	Ether lipid metabolism	Metabolism	Lipid metabolism	6	327	28	2681	0.116716	0.397185	1.75688	circRNA_1011|Chr10:61464686_61498597_-(Pafah1b1);circRNA_1762|Chr13:67141798_67143114_-(Pla2g4a);circRNA_3512|Chr2:113739689_113745181_+(Pld1);circRNA_3515|Chr2:113747182_113764892_+(Pld1);circRNA_4199|Chr3:62719200_62733674_+(Agps);circRNA_5394|Chr5:152619586_152621233_+(Pafah2);	rno00565
rno00590	Arachidonic acid metabolism	Metabolism	Lipid metabolism	1	327	10	2681	0.728305	0.905393	0.819878	circRNA_1762|Chr13:67141798_67143114_-(Pla2g4a);	rno00590
rno00591	Linoleic acid metabolism	Metabolism	Lipid metabolism	1	327	6	2681	0.542154	0.819762	1.36646	circRNA_1762|Chr13:67141798_67143114_-(Pla2g4a);	rno00591
rno00592	alpha-Linolenic acid metabolism	Metabolism	Lipid metabolism	1	327	10	2681	0.728305	0.905393	0.819878	circRNA_1762|Chr13:67141798_67143114_-(Pla2g4a);	rno00592
rno00600	Sphingolipid metabolism	Metabolism	Lipid metabolism	4	327	26	2681	0.393387	0.720731	1.26135	circRNA_0310|Chr1:163182618_163216364_-(Acer3);circRNA_1464|Chr11:87529218_87529984_+(Smpd4);circRNA_1498|Chr12:4448685_4450137_-(Cers4);circRNA_2540|Chr16:54011840_54019134_+(Asah1);	rno00600
rno00620	Pyruvate metabolism	Metabolism	Carbohydrate metabolism	1	327	12	2681	0.790769	0.906315	0.683231	circRNA_6373|Chr8:58182482_58182849_-(Acat1);	rno00620
rno00630	Glyoxylate and dicarboxylate metabolism	Metabolism	Carbohydrate metabolism	3	327	10	2681	0.112526	0.397185	2.45963	circRNA_2416|Chr15:109125713_109141568_+(Pcca);circRNA_2418|Chr15:109127707_109141568_+(Pcca);circRNA_6373|Chr8:58182482_58182849_-(Acat1);	rno00630
rno00640	Propanoate metabolism	Metabolism	Carbohydrate metabolism	8	327	25	2681	0.00745416	0.116937	2.62361	circRNA_2355|Chr15:55485728_55488198_+(Sucla2);circRNA_2416|Chr15:109125713_109141568_+(Pcca);circRNA_2418|Chr15:109127707_109141568_+(Pcca);circRNA_6373|Chr8:58182482_58182849_-(Acat1);circRNA_6567|Chr8:91509748_91527174_+(Bckdhb);circRNA_6838|Chr9:53459782_53462727_-(Hibch);circRNA_6840|Chr9:53475012_53508890_-(Hibch);circRNA_6841|Chr9:53492939_53508890_-(Hibch);	rno00640
rno00760	Nicotinate and nicotinamide metabolism	Metabolism	Metabolism of cofactors and vitamins	1	327	6	2681	0.542154	0.819762	1.36646	circRNA_3460|Chr2:58477282_58489198_+(Nadk2);	rno00760
rno00770	Pantothenate and CoA biosynthesis	Metabolism	Metabolism of cofactors and vitamins	3	327	12	2681	0.17231	0.478097	2.04969	circRNA_0653|Chr1:253120469_253148277_-(Pank1);circRNA_4364|Chr3:123825681_123833222_+(Pank2);circRNA_4365|Chr3:123829471_123833222_+(Pank2);	rno00770
rno00830	Retinol metabolism	Metabolism	Metabolism of cofactors and vitamins	1	327	7	2681	0.598122	0.856531	1.17125	circRNA_5440|Chr5:162834556_162835977_+(Dhrs3);	rno00830
rno00900	Terpenoid backbone biosynthesis	Metabolism	Metabolism of terpenoids and polyketides	2	327	7	2681	0.206342	0.5164	2.34251	circRNA_2722|Chr17:53963185_53968528_+(Ggps1);circRNA_6373|Chr8:58182482_58182849_-(Acat1);	rno00900
rno00970	Aminoacyl-tRNA biosynthesis	Genetic Information Processing	Translation	4	327	16	2681	0.121008	0.404974	2.04969	circRNA_0300|Chr1:161928871_161932898_+(Nars2);circRNA_0301|Chr1:161988635_162006381_+(Nars2);circRNA_2941|Chr18:29633808_29634585_+(Hars2);circRNA_6957|Chr9:84367943_84370769_-(Farsb);	rno00970
rno00983	Drug metabolism - other enzymes	Metabolism	Xenobiotics biodegradation and metabolism	2	327	21	2681	0.746087	0.905393	0.780836	circRNA_1841|Chr13:85401003_85401929_+(Uck2);circRNA_3111|Chr19:15151107_15207439_+(Ces1d);	rno00983
rno01521	EGFR tyrosine kinase inhibitor resistance	Human Diseases	Drug resistance: antineoplastic	11	327	65	2681	0.160848	0.455128	1.38749	circRNA_0451|Chr1:200671013_200672411_-(Fgfr2);circRNA_1857|Chr13:95120752_95128782_-(Akt3);circRNA_1858|Chr13:95167819_95196402_-(Akt3);circRNA_1859|Chr13:95167819_95208329_-(Akt3);circRNA_1860|Chr13:95193009_95196402_-(Akt3);circRNA_1861|Chr13:95193009_95208329_-(Akt3);circRNA_2158|Chr14:100058305_100066787_+(Egfr);circRNA_3150|Chr19:30869716_30883569_+(Gab1);circRNA_4700|Chr4:67399951_67412670…	rno01521
rno01522	Endocrine resistance	Human Diseases	Drug resistance: antineoplastic	20	327	66	2681	6.04194e-05	0.00758264	2.48448	circRNA_1398|Chr11:68722906_68730129_-(Adcy5);circRNA_1399|Chr11:68745884_68750272_-(Adcy5);circRNA_1857|Chr13:95120752_95128782_-(Akt3);circRNA_1858|Chr13:95167819_95196402_-(Akt3);circRNA_1859|Chr13:95167819_95208329_-(Akt3);circRNA_1860|Chr13:95193009_95196402_-(Akt3);circRNA_1861|Chr13:95193009_95208329_-(Akt3);circRNA_2141|Chr14:87328008_87331877_+(Adcy1);circRNA_2142|Chr14:87328008_87357732…	rno01522
rno01523	Antifolate resistance	Human Diseases	Drug resistance: antineoplastic	1	327	15	2681	0.858658	0.937057	0.546585	circRNA_3818|Chr2:240854068_240861760_-(Nfkb1);	rno01523
rno01524	Platinum drug resistance	Human Diseases	Drug resistance: antineoplastic	8	327	45	2681	0.174797	0.478097	1.45756	circRNA_1857|Chr13:95120752_95128782_-(Akt3);circRNA_1858|Chr13:95167819_95196402_-(Akt3);circRNA_1859|Chr13:95167819_95208329_-(Akt3);circRNA_1860|Chr13:95193009_95196402_-(Akt3);circRNA_1861|Chr13:95193009_95208329_-(Akt3);circRNA_3313|Chr2:21915465_21921128_-(Msh3);circRNA_3997|Chr20:44890495_44931228_+(Rev3l);circRNA_6271|Chr8:6014617_6023899_-(Birc2);	rno01524
rno02010	ABC transporters	Environmental Information Processing	Membrane transport	4	327	25	2681	0.364145	0.713007	1.3118	circRNA_4940|Chr4:176868013_176879489_-(Abcc9);circRNA_5101|Chr5:69929580_69966907_-(Abca1);circRNA_5102|Chr5:69951194_69956147_-(Abca1);circRNA_5103|Chr5:69951194_69966907_-(Abca1);	rno02010
rno03008	Ribosome biogenesis in eukaryotes	Genetic Information Processing	Translation	3	327	26	2681	0.631313	0.880331	0.946013	circRNA_0656|Chr1:254700270_254708288_+(Rpp30);circRNA_3538|Chr2:124187476_124205983_+(Spata5);circRNA_3600|Chr2:166406958_166423542_+(Nmd3);	rno03008
rno03013	RNA transport	Genetic Information Processing	Translation	7	327	58	2681	0.573317	0.854134	0.989508	circRNA_0305|Chr1:162684057_162691242_+(Clns1a);circRNA_0306|Chr1:162684057_162696070_+(Clns1a);circRNA_0656|Chr1:254700270_254708288_+(Rpp30);circRNA_3600|Chr2:166406958_166423542_+(Nmd3);circRNA_3969|Chr20:28067776_28072115_+(Ranbp2);circRNA_7206|ChrX:123718252_123720910_-(Upf3b);circRNA_7211|ChrX:128202172_128205259_-(Thoc2);	rno03013
rno03015	mRNA surveillance pathway	Genetic Information Processing	Translation	8	327	47	2681	0.20715	0.5164	1.39554	circRNA_0040|Chr1:16859047_16875754_+(Hbs1l);circRNA_0041|Chr1:16859047_16879498_+(Hbs1l);circRNA_0299|Chr1:157470071_157490006_-(Pcf11);circRNA_1017|Chr10:61882916_61885796_+(Smg6);circRNA_2904|Chr18:24611733_24614740_+(Wdr33);circRNA_2925|Chr18:27704440_27708817_-(Etf1);circRNA_6028|Chr7:60390972_60408823_-(Cpsf6);circRNA_7206|ChrX:123718252_123720910_-(Upf3b);	rno03015
rno03018	RNA degradation	Genetic Information Processing	Folding, sorting and degradation	4	327	53	2681	0.903159	0.954512	0.618776	circRNA_0083|Chr1:36417425_36419485_+(Papd7);circRNA_1521|Chr12:9292180_9313769_-(Pan3);circRNA_6022|Chr7:59556898_59587314_-(Cnot2);circRNA_6448|Chr8:69793755_69795155_-(Dis3l);	rno03018
rno03022	Basal transcription factors	Genetic Information Processing	Transcription	4	327	21	2681	0.248386	0.566772	1.56167	circRNA_1593|Chr12:25431710_25435591_+(Gtf2i);circRNA_1594|Chr12:25442325_25447480_+(Gtf2i);circRNA_2866|Chr18:6218154_6233603_+(Taf4b);circRNA_2909|Chr18:25055044_25059278_+(Ercc3);	rno03022
rno03030	DNA replication	Genetic Information Processing	Replication and repair	1	327	6	2681	0.542154	0.819762	1.36646	circRNA_2312|Chr15:45437783_45445017_+(Rnaseh2b);	rno03030
rno03040	Spliceosome	Genetic Information Processing	Transcription	6	327	30	2681	0.150146	0.443373	1.63976	circRNA_0893|Chr10:29038498_29040713_+(Slu7);circRNA_1119|Chr10:75337353_75340473_+(Srsf1);circRNA_2638|Chr17:9503324_9503470_-(Ddx46);circRNA_3238|Chr19:43394227_43401075_+(Sf3b3);circRNA_4493|Chr3:177131326_177132323_+(Prpf6);circRNA_7211|ChrX:128202172_128205259_-(Thoc2);	rno03040
rno03050	Proteasome	Genetic Information Processing	Folding, sorting and degradation	2	327	10	2681	0.349439	0.690623	1.63976	circRNA_2205|Chr14:115183821_115195697_+(Psme4);circRNA_4483|Chr3:175422379_175423144_-(Psma7);	rno03050
rno03320	PPAR signaling pathway	Organismal Systems	Endocrine system	3	327	54	2681	0.969056	0.976839	0.455488	circRNA_0691|Chr1:259396273_259437470_-(Sorbs1);circRNA_0696|Chr1:259412482_259459540_-(Sorbs1);circRNA_0710|Chr1:259450673_259469248_-(Sorbs1);	rno03320
rno03420	Nucleotide excision repair	Genetic Information Processing	Replication and repair	1	327	10	2681	0.728305	0.905393	0.819878	circRNA_2909|Chr18:25055044_25059278_+(Ercc3);	rno03420
rno03430	Mismatch repair	Genetic Information Processing	Replication and repair	1	327	6	2681	0.542154	0.819762	1.36646	circRNA_3313|Chr2:21915465_21921128_-(Msh3);	rno03430
rno03440	Homologous recombination	Genetic Information Processing	Replication and repair	3	327	21	2681	0.481512	0.792626	1.17125	circRNA_2648|Chr17:10096739_10107746_+(Uimc1);circRNA_2851|Chr18:3175483_3176344_+(Rbbp8);circRNA_5568|Chr6:25903936_25912817_-(Bre);	rno03440
rno03450	Non-homologous end-joining	Genetic Information Processing	Replication and repair	1	327	9	2681	0.690419	0.902067	0.910975	circRNA_1481|Chr11:89328437_89332868_-(Prkdc);	rno03450
rno03460	Fanconi anemia pathway	Genetic Information Processing	Replication and repair	2	327	14	2681	0.523874	0.819762	1.17125	circRNA_2191|Chr14:110683107_110709166_+(Fancl);circRNA_3997|Chr20:44890495_44931228_+(Rev3l);	rno03460
rno04010	MAPK signaling pathway	Environmental Information Processing	Signal transduction	23	327	213	2681	0.773193	0.906315	0.885314	circRNA_0451|Chr1:200671013_200672411_-(Fgfr2);circRNA_1021|Chr10:62540625_62581037_+(Taok1);circRNA_1762|Chr13:67141798_67143114_-(Pla2g4a);circRNA_1857|Chr13:95120752_95128782_-(Akt3);circRNA_1858|Chr13:95167819_95196402_-(Akt3);circRNA_1859|Chr13:95167819_95208329_-(Akt3);circRNA_1860|Chr13:95193009_95196402_-(Akt3);circRNA_1861|Chr13:95193009_95208329_-(Akt3);circRNA_2158|Chr14:100058305_1000…	rno04010
rno04012	ErbB signaling pathway	Environmental Information Processing	Signal transduction	14	327	71	2681	0.0439922	0.251913	1.61666	circRNA_1368|Chr11:51049296_51068978_-(Cblb);circRNA_1369|Chr11:51057506_51068978_-(Cblb);circRNA_1857|Chr13:95120752_95128782_-(Akt3);circRNA_1858|Chr13:95167819_95196402_-(Akt3);circRNA_1859|Chr13:95167819_95208329_-(Akt3);circRNA_1860|Chr13:95193009_95196402_-(Akt3);circRNA_1861|Chr13:95193009_95208329_-(Akt3);circRNA_2158|Chr14:100058305_100066787_+(Egfr);circRNA_3150|Chr19:30869716_30883569_…	rno04012
rno04014	Ras signaling pathway	Environmental Information Processing	Signal transduction	18	327	131	2681	0.329193	0.677274	1.12655	circRNA_0451|Chr1:200671013_200672411_-(Fgfr2);circRNA_0839|Chr10:5930383_5930975_+(Grin2a);circRNA_1304|Chr11:29967593_29992834_-(Tiam1);circRNA_1659|Chr12:44761634_44762147_-(Ksr2);circRNA_1762|Chr13:67141798_67143114_-(Pla2g4a);circRNA_1857|Chr13:95120752_95128782_-(Akt3);circRNA_1858|Chr13:95167819_95196402_-(Akt3);circRNA_1859|Chr13:95167819_95208329_-(Akt3);circRNA_1860|Chr13:95193009_95196…	rno04014
rno04015	Rap1 signaling pathway	Environmental Information Processing	Signal transduction	27	327	139	2681	0.00795145	0.117401	1.59257	circRNA_0451|Chr1:200671013_200672411_-(Fgfr2);circRNA_0839|Chr10:5930383_5930975_+(Grin2a);circRNA_1304|Chr11:29967593_29992834_-(Tiam1);circRNA_1398|Chr11:68722906_68730129_-(Adcy5);circRNA_1399|Chr11:68745884_68750272_-(Adcy5);circRNA_1857|Chr13:95120752_95128782_-(Akt3);circRNA_1858|Chr13:95167819_95196402_-(Akt3);circRNA_1859|Chr13:95167819_95208329_-(Akt3);circRNA_1860|Chr13:95193009_951964…	rno04015
rno04020	Calcium signaling pathway	Environmental Information Processing	Signal transduction	22	327	116	2681	0.0207688	0.151587	1.55494	circRNA_0839|Chr10:5930383_5930975_+(Grin2a);circRNA_1405|Chr11:69064518_69068514_-(Mylk);circRNA_1725|Chr13:50150091_50150276_-(Atp2b4);circRNA_2141|Chr14:87328008_87331877_+(Adcy1);circRNA_2142|Chr14:87328008_87357732_+(Adcy1);circRNA_2143|Chr14:87328008_87377952_+(Adcy1);circRNA_2144|Chr14:87331763_87357732_+(Adcy1);circRNA_2145|Chr14:87350088_87357732_+(Adcy1);circRNA_2158|Chr14:100058305_100…	rno04020
rno04022	cGMP - PKG signaling pathway	Environmental Information Processing	Signal transduction	31	327	156	2681	0.00316564	0.0611213	1.62924	circRNA_0380|Chr1:184008119_184017761_+(Pde3b);circRNA_1398|Chr11:68722906_68730129_-(Adcy5);circRNA_1399|Chr11:68745884_68750272_-(Adcy5);circRNA_1405|Chr11:69064518_69068514_-(Mylk);circRNA_1593|Chr12:25431710_25435591_+(Gtf2i);circRNA_1594|Chr12:25442325_25447480_+(Gtf2i);circRNA_1725|Chr13:50150091_50150276_-(Atp2b4);circRNA_1857|Chr13:95120752_95128782_-(Akt3);circRNA_1858|Chr13:95167819_951…	rno04022
rno04024	cAMP signaling pathway	Environmental Information Processing	Signal transduction	28	327	130	2681	0.00143389	0.0327188	1.76589	circRNA_0380|Chr1:184008119_184017761_+(Pde3b);circRNA_0839|Chr10:5930383_5930975_+(Grin2a);circRNA_1304|Chr11:29967593_29992834_-(Tiam1);circRNA_1398|Chr11:68722906_68730129_-(Adcy5);circRNA_1399|Chr11:68745884_68750272_-(Adcy5);circRNA_1725|Chr13:50150091_50150276_-(Atp2b4);circRNA_1857|Chr13:95120752_95128782_-(Akt3);circRNA_1858|Chr13:95167819_95196402_-(Akt3);circRNA_1859|Chr13:95167819_9520…	rno04024
rno04060	Cytokine-cytokine receptor interaction	Environmental Information Processing	Signaling molecules and interaction	2	327	32	2681	0.916483	0.954512	0.512424	circRNA_2158|Chr14:100058305_100066787_+(Egfr);circRNA_3450|Chr2:56451097_56456188_+(Lifr);	rno04060
rno04062	Chemokine signaling pathway	Organismal Systems	Immune system	24	327	98	2681	0.000457431	0.0164022	2.00786	circRNA_1304|Chr11:29967593_29992834_-(Tiam1);circRNA_1398|Chr11:68722906_68730129_-(Adcy5);circRNA_1399|Chr11:68745884_68750272_-(Adcy5);circRNA_1857|Chr13:95120752_95128782_-(Akt3);circRNA_1858|Chr13:95167819_95196402_-(Akt3);circRNA_1859|Chr13:95167819_95208329_-(Akt3);circRNA_1860|Chr13:95193009_95196402_-(Akt3);circRNA_1861|Chr13:95193009_95208329_-(Akt3);circRNA_2096|Chr14:81267948_81280976…	rno04062
rno04064	NF-kappa B signaling pathway	Environmental Information Processing	Signal transduction	4	327	30	2681	0.506973	0.814723	1.09317	circRNA_3818|Chr2:240854068_240861760_-(Nfkb1);circRNA_4871|Chr4:152265847_152274059_-(Erc1);circRNA_4873|Chr4:152282030_152355930_-(Erc1);circRNA_6271|Chr8:6014617_6023899_-(Birc2);	rno04064
rno04066	HIF-1 signaling pathway	Environmental Information Processing	Signal transduction	8	327	51	2681	0.277924	0.597969	1.28608	circRNA_1857|Chr13:95120752_95128782_-(Akt3);circRNA_1858|Chr13:95167819_95196402_-(Akt3);circRNA_1859|Chr13:95167819_95208329_-(Akt3);circRNA_1860|Chr13:95193009_95196402_-(Akt3);circRNA_1861|Chr13:95193009_95208329_-(Akt3);circRNA_2158|Chr14:100058305_100066787_+(Egfr);circRNA_3796|Chr2:231078900_231128709_+(Camk2d);circRNA_3818|Chr2:240854068_240861760_-(Nfkb1);	rno04066
rno04068	FoxO signaling pathway	Environmental Information Processing	Signal transduction	13	327	87	2681	0.256965	0.575876	1.2251	circRNA_1857|Chr13:95120752_95128782_-(Akt3);circRNA_1858|Chr13:95167819_95196402_-(Akt3);circRNA_1859|Chr13:95167819_95208329_-(Akt3);circRNA_1860|Chr13:95193009_95196402_-(Akt3);circRNA_1861|Chr13:95193009_95208329_-(Akt3);circRNA_2158|Chr14:100058305_100066787_+(Egfr);circRNA_3031|Chr18:69634006_69647714_-(Smad4);circRNA_3032|Chr18:69634006_69657373_-(Smad4);circRNA_3034|Chr18:69642130_6965737…	rno04068
rno04070	Phosphatidylinositol signaling system	Environmental Information Processing	Signal transduction	12	327	102	2681	0.60117	0.856531	0.964562	circRNA_0389|Chr1:185252579_185264972_+(Pik3c2a);circRNA_0394|Chr1:185263914_185297636_+(Pik3c2a);circRNA_0445|Chr1:200102205_200105174_+(Inpp5f);circRNA_2072|Chr14:60573253_60586776_-(Pi4k2b);circRNA_2364|Chr15:60816746_60821766_-(Dgkh);circRNA_2832|Chr18:307052_312848_-(Mtmr1);circRNA_3147|Chr19:29642344_29645344_-(Inpp4b);circRNA_3929|Chr20:18467660_18471939_-(Ipmk);circRNA_4663|Chr4:64431354_…	rno04070
rno04071	Sphingolipid signaling pathway	Environmental Information Processing	Signal transduction	14	327	88	2681	0.177708	0.47962	1.30435	circRNA_1498|Chr12:4448685_4450137_-(Cers4);circRNA_1857|Chr13:95120752_95128782_-(Akt3);circRNA_1858|Chr13:95167819_95196402_-(Akt3);circRNA_1859|Chr13:95167819_95208329_-(Akt3);circRNA_1860|Chr13:95193009_95196402_-(Akt3);circRNA_1861|Chr13:95193009_95208329_-(Akt3);circRNA_2540|Chr16:54011840_54019134_+(Asah1);circRNA_2837|Chr18:1337228_1354828_-(Rock1);circRNA_3512|Chr2:113739689_113745181_+(…	rno04071
rno04072	Phospholipase D signaling pathway	Environmental Information Processing	Signal transduction	25	327	89	2681	3.07049e-05	0.00758264	2.30303	circRNA_1398|Chr11:68722906_68730129_-(Adcy5);circRNA_1399|Chr11:68745884_68750272_-(Adcy5);circRNA_1762|Chr13:67141798_67143114_-(Pla2g4a);circRNA_1857|Chr13:95120752_95128782_-(Akt3);circRNA_1858|Chr13:95167819_95196402_-(Akt3);circRNA_1859|Chr13:95167819_95208329_-(Akt3);circRNA_1860|Chr13:95193009_95196402_-(Akt3);circRNA_1861|Chr13:95193009_95208329_-(Akt3);circRNA_2141|Chr14:87328008_873318…	rno04072
rno04080	Neuroactive ligand-receptor interaction	Environmental Information Processing	Signaling molecules and interaction	3	327	14	2681	0.238839	0.555079	1.75688	circRNA_0839|Chr10:5930383_5930975_+(Grin2a);circRNA_3280|Chr19:60370736_60429996_+(Pard3);circRNA_3978|Chr20:31900597_31901729_+(Tacr2);	rno04080
rno04110	Cell cycle	Cellular Processes	Cell growth and death	8	327	72	2681	0.66721	0.89556	0.910975	circRNA_1039|Chr10:63908528_63915032_+(Ywhae);circRNA_1481|Chr11:89328437_89332868_-(Prkdc);circRNA_3031|Chr18:69634006_69647714_-(Smad4);circRNA_3032|Chr18:69634006_69657373_-(Smad4);circRNA_3034|Chr18:69642130_69657373_-(Smad4);circRNA_6609|Chr8:109192353_109216053_+(Stag1);circRNA_6611|Chr8:109243253_109288160_+(Stag1);circRNA_6612|Chr8:109250465_109254764_+(Stag1);	rno04110
rno04114	Oocyte meiosis	Cellular Processes	Cell growth and death	13	327	70	2681	0.076719	0.326381	1.52263	circRNA_0661|Chr1:255685048_255694514_-(Cpeb3);circRNA_1039|Chr10:63908528_63915032_+(Ywhae);circRNA_1398|Chr11:68722906_68730129_-(Adcy5);circRNA_1399|Chr11:68745884_68750272_-(Adcy5);circRNA_2141|Chr14:87328008_87331877_+(Adcy1);circRNA_2142|Chr14:87328008_87357732_+(Adcy1);circRNA_2143|Chr14:87328008_87377952_+(Adcy1);circRNA_2144|Chr14:87331763_87357732_+(Adcy1);circRNA_2145|Chr14:87350088_87…	rno04114
rno04115	p53 signaling pathway	Cellular Processes	Cell growth and death	1	327	19	2681	0.916282	0.954512	0.431515	circRNA_1811|Chr13:76952080_77004245_+(Rfwd2);	rno04115
rno04120	Ubiquitin mediated proteolysis	Genetic Information Processing	Folding, sorting and degradation	16	327	120	2681	0.390838	0.720731	1.09317	circRNA_0216|Chr1:116643750_116660509_+(Ube3a);circRNA_0999|Chr10:59192184_59239990_+(Ube2g1);circRNA_1368|Chr11:51049296_51068978_-(Cblb);circRNA_1369|Chr11:51057506_51068978_-(Cblb);circRNA_1811|Chr13:76952080_77004245_+(Rfwd2);circRNA_2191|Chr14:110683107_110709166_+(Fancl);circRNA_3062|Chr18:73479863_73498648_+(Pias2);circRNA_4426|Chr3:150692740_150696569_+(Itch);circRNA_4428|Chr3:150717267_1…	rno04120
rno04137	Mitophagy - animal	Cellular Processes	Transport and catabolism	1	327	33	2681	0.986701	0.990647	0.248448	circRNA_2770|Chr17:77176705_77178100_+(Optn);	rno04137
rno04140	Autophagy - animal	Cellular Processes	Transport and catabolism	8	327	77	2681	0.740251	0.905393	0.851821	circRNA_0317|Chr1:164025518_164055455_-(Uvrag);circRNA_1857|Chr13:95120752_95128782_-(Akt3);circRNA_1858|Chr13:95167819_95196402_-(Akt3);circRNA_1859|Chr13:95167819_95208329_-(Akt3);circRNA_1860|Chr13:95193009_95196402_-(Akt3);circRNA_1861|Chr13:95193009_95208329_-(Akt3);circRNA_4518|Chr4:6866069_6869642_+(Rheb);circRNA_6125|Chr7:94895697_94898194_+(Deptor);	rno04140
rno04141	Protein processing in endoplasmic reticulum	Genetic Information Processing	Folding, sorting and degradation	2	327	86	2681	0.999847	0.999847	0.190669	circRNA_0999|Chr10:59192184_59239990_+(Ube2g1);circRNA_3249|Chr19:52169070_52171485_-(Mbtps1);	rno04141
rno04142	Lysosome	Cellular Processes	Transport and catabolism	3	327	50	2681	0.954124	0.965666	0.491927	circRNA_2540|Chr16:54011840_54019134_+(Asah1);circRNA_5959|Chr7:28987514_28990116_+(Gnptab);circRNA_5960|Chr7:28987514_28992637_+(Gnptab);	rno04142
rno04144	Endocytosis	Cellular Processes	Transport and catabolism	26	327	193	2681	0.320245	0.669846	1.1045	circRNA_0193|Chr1:100913425_100914082_-(Ap2a1);circRNA_0451|Chr1:200671013_200672411_-(Fgfr2);circRNA_0865|Chr10:15358869_15376292_-(Rab11fip3);circRNA_0989|Chr10:57549452_57549919_+(Rabep1);circRNA_0990|Chr10:57549452_57563686_+(Rabep1);circRNA_1284|Chr11:2672491_2678232_-(Chmp2b);circRNA_1368|Chr11:51049296_51068978_-(Cblb);circRNA_1369|Chr11:51057506_51068978_-(Cblb);circRNA_1411|Chr11:7072456…	rno04144
rno04145	Phagosome	Cellular Processes	Transport and catabolism	5	327	61	2681	0.882619	0.954512	0.672031	circRNA_0878|Chr10:16769713_16774652_-(Atp6v0e1);circRNA_3872|Chr20:3232306_3273815_+(RT1-T24-3);circRNA_4147|Chr3:46525736_46528994_-(Pla2r1);circRNA_4212|Chr3:71143189_71149475_+(Itgav);circRNA_6920|Chr9:71920586_71960153_+(Pikfyve);	rno04145
rno04146	Peroxisome	Cellular Processes	Transport and catabolism	1	327	22	2681	0.943508	0.965666	0.372672	circRNA_4199|Chr3:62719200_62733674_+(Agps);	rno04146
rno04150	mTOR signaling pathway	Environmental Information Processing	Signal transduction	16	327	89	2681	0.0682404	0.300497	1.47394	circRNA_1857|Chr13:95120752_95128782_-(Akt3);circRNA_1858|Chr13:95167819_95196402_-(Akt3);circRNA_1859|Chr13:95167819_95208329_-(Akt3);circRNA_1860|Chr13:95193009_95196402_-(Akt3);circRNA_1861|Chr13:95193009_95208329_-(Akt3);circRNA_3448|Chr2:56061126_56069928_+(Rictor);circRNA_4518|Chr4:6866069_6869642_+(Rheb);circRNA_4700|Chr4:67399951_67412670_-(Braf);circRNA_4702|Chr4:67449579_67450836_-(Braf…	rno04150
rno04151	PI3K-Akt signaling pathway	Environmental Information Processing	Signal transduction	17	327	161	2681	0.77886	0.906315	0.865709	circRNA_0451|Chr1:200671013_200672411_-(Fgfr2);circRNA_1039|Chr10:63908528_63915032_+(Ywhae);circRNA_1151|Chr10:82753666_82754365_+(Col1a1);circRNA_1857|Chr13:95120752_95128782_-(Akt3);circRNA_1858|Chr13:95167819_95196402_-(Akt3);circRNA_1859|Chr13:95167819_95208329_-(Akt3);circRNA_1860|Chr13:95193009_95196402_-(Akt3);circRNA_1861|Chr13:95193009_95208329_-(Akt3);circRNA_2158|Chr14:100058305_10006…	rno04151
rno04152	AMPK signaling pathway	Environmental Information Processing	Signal transduction	8	327	63	2681	0.509607	0.814723	1.04111	circRNA_1857|Chr13:95120752_95128782_-(Akt3);circRNA_1858|Chr13:95167819_95196402_-(Akt3);circRNA_1859|Chr13:95167819_95208329_-(Akt3);circRNA_1860|Chr13:95193009_95196402_-(Akt3);circRNA_1861|Chr13:95193009_95208329_-(Akt3);circRNA_2062|Chr14:45683767_45691895_-(Tbc1d1);circRNA_4518|Chr4:6866069_6869642_+(Rheb);circRNA_6971|Chr9:92859987_92880445_+(Cab39);	rno04152
rno04210	Apoptosis	Cellular Processes	Cell growth and death	7	327	62	2681	0.646532	0.882957	0.925668	circRNA_1857|Chr13:95120752_95128782_-(Akt3);circRNA_1858|Chr13:95167819_95196402_-(Akt3);circRNA_1859|Chr13:95167819_95208329_-(Akt3);circRNA_1860|Chr13:95193009_95196402_-(Akt3);circRNA_1861|Chr13:95193009_95208329_-(Akt3);circRNA_3818|Chr2:240854068_240861760_-(Nfkb1);circRNA_6271|Chr8:6014617_6023899_-(Birc2);	rno04210
rno04211	Longevity regulating pathway - mammal	Organismal Systems	Aging	17	327	64	2681	0.00118817	0.0298231	2.1778	circRNA_1398|Chr11:68722906_68730129_-(Adcy5);circRNA_1399|Chr11:68745884_68750272_-(Adcy5);circRNA_1857|Chr13:95120752_95128782_-(Akt3);circRNA_1858|Chr13:95167819_95196402_-(Akt3);circRNA_1859|Chr13:95167819_95208329_-(Akt3);circRNA_1860|Chr13:95193009_95196402_-(Akt3);circRNA_1861|Chr13:95193009_95208329_-(Akt3);circRNA_2141|Chr14:87328008_87331877_+(Adcy1);circRNA_2142|Chr14:87328008_87357732…	rno04211
rno04213	Longevity regulating pathway - multiple species	Organismal Systems	Aging	12	327	31	2681	0.000144198	0.00904843	3.17372	circRNA_1398|Chr11:68722906_68730129_-(Adcy5);circRNA_1399|Chr11:68745884_68750272_-(Adcy5);circRNA_1857|Chr13:95120752_95128782_-(Akt3);circRNA_1858|Chr13:95167819_95196402_-(Akt3);circRNA_1859|Chr13:95167819_95208329_-(Akt3);circRNA_1860|Chr13:95193009_95196402_-(Akt3);circRNA_1861|Chr13:95193009_95208329_-(Akt3);circRNA_2141|Chr14:87328008_87331877_+(Adcy1);circRNA_2142|Chr14:87328008_87357732…	rno04213
rno04215	Apoptosis - multiple species	Cellular Processes	Cell growth and death	2	327	9	2681	0.302056	0.63711	1.82195	circRNA_5545|Chr6:21942755_21944809_-(Birc6);circRNA_6271|Chr8:6014617_6023899_-(Birc2);	rno04215
rno04216	Ferroptosis	Cellular Processes	Cell growth and death	1	327	10	2681	0.728305	0.905393	0.819878	circRNA_6262|Chr7:144080542_144084759_+(Pcbp2);	rno04216
rno04217	Necroptosis	Cellular Processes	Cell growth and death	6	327	44	2681	0.452507	0.77794	1.11802	circRNA_1284|Chr11:2672491_2678232_-(Chmp2b);circRNA_1762|Chr13:67141798_67143114_-(Pla2g4a);circRNA_2271|Chr15:34277381_34277914_+(Rnf31);circRNA_3796|Chr2:231078900_231128709_+(Camk2d);circRNA_5293|Chr5:129621176_129647021_+(Faf1);circRNA_6271|Chr8:6014617_6023899_-(Birc2);	rno04217
rno04218	Cellular senescence	Cellular Processes	Cell growth and death	14	327	111	2681	0.490761	0.799876	1.03408	circRNA_1644|Chr12:39719713_39721351_+(Rad9b);circRNA_1857|Chr13:95120752_95128782_-(Akt3);circRNA_1858|Chr13:95167819_95196402_-(Akt3);circRNA_1859|Chr13:95167819_95208329_-(Akt3);circRNA_1860|Chr13:95193009_95196402_-(Akt3);circRNA_1861|Chr13:95193009_95208329_-(Akt3);circRNA_2334|Chr15:51896716_51944899_-(Ppp3cc);circRNA_2337|Chr15:51925689_51954838_-(Ppp3cc);circRNA_3204|Chr19:38057557_380913…	rno04218
rno04260	Cardiac muscle contraction	Organismal Systems	Circulatory system	5	327	39	2681	0.525817	0.819762	1.05113	circRNA_1740|Chr13:52671461_52673721_+(Tnnt2);circRNA_5502|Chr6:4259110_4315062_-(Slc8a1);circRNA_5503|Chr6:4278307_4315062_-(Slc8a1);circRNA_5504|Chr6:4298605_4315062_-(Slc8a1);circRNA_7250|ChrX:159023994_159035906_+(Slc9a6);	rno04260
rno04261	Adrenergic signaling in cardiomyocytes	Organismal Systems	Circulatory system	20	327	102	2681	0.0191141	0.151587	1.6076	circRNA_1398|Chr11:68722906_68730129_-(Adcy5);circRNA_1399|Chr11:68745884_68750272_-(Adcy5);circRNA_1725|Chr13:50150091_50150276_-(Atp2b4);circRNA_1740|Chr13:52671461_52673721_+(Tnnt2);circRNA_1857|Chr13:95120752_95128782_-(Akt3);circRNA_1858|Chr13:95167819_95196402_-(Akt3);circRNA_1859|Chr13:95167819_95208329_-(Akt3);circRNA_1860|Chr13:95193009_95196402_-(Akt3);circRNA_1861|Chr13:95193009_952083…	rno04261
rno04270	Vascular smooth muscle contraction	Organismal Systems	Circulatory system	21	327	132	2681	0.117098	0.397185	1.30435	circRNA_0790|Chr10:776697_783836_+(Myh11);circRNA_0793|Chr10:776697_822670_+(Myh11);circRNA_0799|Chr10:805713_819703_+(Myh11);circRNA_1398|Chr11:68722906_68730129_-(Adcy5);circRNA_1399|Chr11:68745884_68750272_-(Adcy5);circRNA_1405|Chr11:69064518_69068514_-(Mylk);circRNA_1762|Chr13:67141798_67143114_-(Pla2g4a);circRNA_2141|Chr14:87328008_87331877_+(Adcy1);circRNA_2142|Chr14:87328008_87357732_+(Adc…	rno04270
rno04310	Wnt signaling pathway	Environmental Information Processing	Signal transduction	12	327	88	2681	0.385789	0.720731	1.11802	circRNA_2334|Chr15:51896716_51944899_-(Ppp3cc);circRNA_2337|Chr15:51925689_51954838_-(Ppp3cc);circRNA_3031|Chr18:69634006_69647714_-(Smad4);circRNA_3032|Chr18:69634006_69657373_-(Smad4);circRNA_3034|Chr18:69642130_69657373_-(Smad4);circRNA_3204|Chr19:38057557_38091369_+(Nfatc3);circRNA_3796|Chr2:231078900_231128709_+(Camk2d);circRNA_4917|Chr4:168213382_168221653_-(Lrp6);circRNA_4921|Chr4:16826003…	rno04310
rno04330	Notch signaling pathway	Environmental Information Processing	Signal transduction	2	327	19	2681	0.693621	0.902067	0.863029	circRNA_3701|Chr2:200243345_200253557_+(Notch2);circRNA_4377|Chr3:130093308_130099815_-(Jag1);	rno04330
rno04340	Hedgehog signaling pathway	Environmental Information Processing	Signal transduction	3	327	25	2681	0.60386	0.856531	0.983853	circRNA_2720|Chr17:52477332_52555114_-(Gli3);circRNA_6332|Chr8:36673405_36682424_+(Cdon);circRNA_6959|Chr9:86083543_86087176_-(Cul3);	rno04340
rno04350	TGF-beta signaling pathway	Environmental Information Processing	Signal transduction	6	327	62	2681	0.786175	0.906315	0.79343	circRNA_2837|Chr18:1337228_1354828_-(Rock1);circRNA_3031|Chr18:69634006_69647714_-(Smad4);circRNA_3032|Chr18:69634006_69657373_-(Smad4);circRNA_3034|Chr18:69642130_69657373_-(Smad4);circRNA_6642|Chr8:117106575_117109692_+(Rhoa);circRNA_6643|Chr8:117109572_117114039_+(Rhoa);	rno04350
rno04360	Axon guidance	Organismal Systems	Development and regeneration	15	327	115	2681	0.432157	0.753654	1.06941	circRNA_1875|Chr13:100300002_100353039_-(Enah);circRNA_2334|Chr15:51896716_51944899_-(Ppp3cc);circRNA_2337|Chr15:51925689_51954838_-(Ppp3cc);circRNA_2837|Chr18:1337228_1354828_-(Rock1);circRNA_3204|Chr19:38057557_38091369_+(Nfatc3);circRNA_3280|Chr19:60370736_60429996_+(Pard3);circRNA_3751|Chr2:212852209_212852849_-(Ntng1);circRNA_3753|Chr2:213064653_213065395_-(Ntng1);circRNA_3796|Chr2:231078900…	rno04360
rno04370	VEGF signaling pathway	Environmental Information Processing	Signal transduction	10	327	60	2681	0.188372	0.502993	1.36646	circRNA_1762|Chr13:67141798_67143114_-(Pla2g4a);circRNA_1857|Chr13:95120752_95128782_-(Akt3);circRNA_1858|Chr13:95167819_95196402_-(Akt3);circRNA_1859|Chr13:95167819_95208329_-(Akt3);circRNA_1860|Chr13:95193009_95196402_-(Akt3);circRNA_1861|Chr13:95193009_95208329_-(Akt3);circRNA_2334|Chr15:51896716_51944899_-(Ppp3cc);circRNA_2337|Chr15:51925689_51954838_-(Ppp3cc);circRNA_6155|Chr7:114555889_1145…	rno04370
rno04371	Apelin signaling pathway	Environmental Information Processing	Signal transduction	27	327	111	2681	0.000227081	0.0113995	1.9943	circRNA_0380|Chr1:184008119_184017761_+(Pde3b);circRNA_1398|Chr11:68722906_68730129_-(Adcy5);circRNA_1399|Chr11:68745884_68750272_-(Adcy5);circRNA_1405|Chr11:69064518_69068514_-(Mylk);circRNA_1857|Chr13:95120752_95128782_-(Akt3);circRNA_1858|Chr13:95167819_95196402_-(Akt3);circRNA_1859|Chr13:95167819_95208329_-(Akt3);circRNA_1860|Chr13:95193009_95196402_-(Akt3);circRNA_1861|Chr13:95193009_9520832…	rno04371
rno04380	Osteoclast differentiation	Organismal Systems	Development and regeneration	9	327	64	2681	0.377809	0.713007	1.15295	circRNA_1857|Chr13:95120752_95128782_-(Akt3);circRNA_1858|Chr13:95167819_95196402_-(Akt3);circRNA_1859|Chr13:95167819_95208329_-(Akt3);circRNA_1860|Chr13:95193009_95196402_-(Akt3);circRNA_1861|Chr13:95193009_95208329_-(Akt3);circRNA_2334|Chr15:51896716_51944899_-(Ppp3cc);circRNA_2337|Chr15:51925689_51954838_-(Ppp3cc);circRNA_3818|Chr2:240854068_240861760_-(Nfkb1);circRNA_6215|Chr7:130113212_13011…	rno04380
rno04390	Hippo signaling pathway	Environmental Information Processing	Signal transduction	13	327	84	2681	0.217414	0.529815	1.26886	circRNA_0373|Chr1:177521072_177569872_+(Tead1);circRNA_0890|Chr10:20741182_20746474_-(Wwc1);circRNA_1039|Chr10:63908528_63915032_+(Ywhae);circRNA_2137|Chr14:85059667_85061960_-(Nf2);circRNA_3031|Chr18:69634006_69647714_-(Smad4);circRNA_3032|Chr18:69634006_69657373_-(Smad4);circRNA_3034|Chr18:69642130_69657373_-(Smad4);circRNA_3280|Chr19:60370736_60429996_+(Pard3);circRNA_6074|Chr7:73684650_736980…	rno04390
rno04392	Hippo signaling pathway - multiple species	Environmental Information Processing	Signal transduction	7	327	26	2681	0.0316129	0.203457	2.20736	circRNA_0373|Chr1:177521072_177569872_+(Tead1);circRNA_0890|Chr10:20741182_20746474_-(Wwc1);circRNA_2137|Chr14:85059667_85061960_-(Nf2);circRNA_6074|Chr7:73684650_73698020_-(Stk3);circRNA_6077|Chr7:73808151_73848871_-(Stk3);circRNA_6079|Chr7:73834044_73848871_-(Stk3);circRNA_6272|Chr8:6135492_6161740_-(Yap1);	rno04392
rno04510	Focal adhesion	Cellular Processes	Cellular community - eukaryotes	25	327	192	2681	0.393311	0.720731	1.06755	circRNA_0370|Chr1:177389638_177397572_+(Parva);circRNA_1151|Chr10:82753666_82754365_+(Col1a1);circRNA_1405|Chr11:69064518_69068514_-(Mylk);circRNA_1857|Chr13:95120752_95128782_-(Akt3);circRNA_1858|Chr13:95167819_95196402_-(Akt3);circRNA_1859|Chr13:95167819_95208329_-(Akt3);circRNA_1860|Chr13:95193009_95196402_-(Akt3);circRNA_1861|Chr13:95193009_95208329_-(Akt3);circRNA_2158|Chr14:100058305_100066…	rno04510
rno04512	ECM-receptor interaction	Environmental Information Processing	Signaling molecules and interaction	5	327	70	2681	0.941754	0.965666	0.585627	circRNA_1151|Chr10:82753666_82754365_+(Col1a1);circRNA_3428|Chr2:47182739_47203913_-(Itga1);circRNA_4212|Chr3:71143189_71149475_+(Itgav);circRNA_5408|Chr5:155850980_155851664_+(Hspg2);circRNA_6680|Chr8:127289436_127301219_+(Itga9);	rno04512
rno04514	Cell adhesion molecules (CAMs)	Environmental Information Processing	Signaling molecules and interaction	6	327	51	2681	0.603136	0.856531	0.964562	circRNA_3751|Chr2:212852209_212852849_-(Ntng1);circRNA_3753|Chr2:213064653_213065395_-(Ntng1);circRNA_3872|Chr20:3232306_3273815_+(RT1-T24-3);circRNA_4212|Chr3:71143189_71149475_+(Itgav);circRNA_6399|Chr8:63332376_63335340_-(Cd276);circRNA_6680|Chr8:127289436_127301219_+(Itga9);	rno04514
rno04520	Adherens junction	Cellular Processes	Cellular community - eukaryotes	11	327	112	2681	0.823492	0.918651	0.805237	circRNA_0691|Chr1:259396273_259437470_-(Sorbs1);circRNA_0696|Chr1:259412482_259459540_-(Sorbs1);circRNA_0710|Chr1:259450673_259469248_-(Sorbs1);circRNA_2158|Chr14:100058305_100066787_+(Egfr);circRNA_3031|Chr18:69634006_69647714_-(Smad4);circRNA_3032|Chr18:69634006_69657373_-(Smad4);circRNA_3034|Chr18:69642130_69657373_-(Smad4);circRNA_3280|Chr19:60370736_60429996_+(Pard3);circRNA_5754|Chr6:103389…	rno04520
rno04530	Tight junction	Cellular Processes	Cellular community - eukaryotes	12	327	118	2681	0.794504	0.906457	0.833774	circRNA_0790|Chr10:776697_783836_+(Myh11);circRNA_0793|Chr10:776697_822670_+(Myh11);circRNA_0799|Chr10:805713_819703_+(Myh11);circRNA_1304|Chr11:29967593_29992834_-(Tiam1);circRNA_2137|Chr14:85059667_85061960_-(Nf2);circRNA_2837|Chr18:1337228_1354828_-(Rock1);circRNA_3280|Chr19:60370736_60429996_+(Pard3);circRNA_4014|Chr20:50444171_50448905_+(Bves);circRNA_4812|Chr4:125734597_125789911_-(Magi1);c…	rno04530
rno04540	Gap junction	Cellular Processes	Cellular community - eukaryotes	10	327	65	2681	0.263564	0.584097	1.26135	circRNA_1398|Chr11:68722906_68730129_-(Adcy5);circRNA_1399|Chr11:68745884_68750272_-(Adcy5);circRNA_2141|Chr14:87328008_87331877_+(Adcy1);circRNA_2142|Chr14:87328008_87357732_+(Adcy1);circRNA_2143|Chr14:87328008_87377952_+(Adcy1);circRNA_2144|Chr14:87331763_87357732_+(Adcy1);circRNA_2145|Chr14:87350088_87357732_+(Adcy1);circRNA_2158|Chr14:100058305_100066787_+(Egfr);circRNA_5724|Chr6:91938501_919…	rno04540
rno04550	Signaling pathways regulating pluripotency of stem cells	Cellular Processes	Cellular community - eukaryotes	11	327	60	2681	0.105913	0.396778	1.50311	circRNA_0451|Chr1:200671013_200672411_-(Fgfr2);circRNA_1857|Chr13:95120752_95128782_-(Akt3);circRNA_1858|Chr13:95167819_95196402_-(Akt3);circRNA_1859|Chr13:95167819_95208329_-(Akt3);circRNA_1860|Chr13:95193009_95196402_-(Akt3);circRNA_1861|Chr13:95193009_95208329_-(Akt3);circRNA_3031|Chr18:69634006_69647714_-(Smad4);circRNA_3032|Chr18:69634006_69657373_-(Smad4);circRNA_3034|Chr18:69642130_6965737…	rno04550
rno04610	Complement and coagulation cascades	Organismal Systems	Immune system	2	327	12	2681	0.440354	0.762268	1.36646	circRNA_2686|Chr17:28580286_28608641_+(F13a1);circRNA_3443|Chr2:54755242_54759947_-(C7);	rno04610
rno04611	Platelet activation	Organismal Systems	Immune system	23	327	122	2681	0.0195591	0.151587	1.54567	circRNA_1151|Chr10:82753666_82754365_+(Col1a1);circRNA_1398|Chr11:68722906_68730129_-(Adcy5);circRNA_1399|Chr11:68745884_68750272_-(Adcy5);circRNA_1405|Chr11:69064518_69068514_-(Mylk);circRNA_1762|Chr13:67141798_67143114_-(Pla2g4a);circRNA_1857|Chr13:95120752_95128782_-(Akt3);circRNA_1858|Chr13:95167819_95196402_-(Akt3);circRNA_1859|Chr13:95167819_95208329_-(Akt3);circRNA_1860|Chr13:95193009_9519…	rno04611
rno04612	Antigen processing and presentation	Organismal Systems	Immune system	1	327	23	2681	0.950456	0.965666	0.356469	circRNA_3872|Chr20:3232306_3273815_+(RT1-T24-3);	rno04612
rno04620	Toll-like receptor signaling pathway	Organismal Systems	Immune system	7	327	33	2681	0.0981431	0.384905	1.73913	circRNA_1857|Chr13:95120752_95128782_-(Akt3);circRNA_1858|Chr13:95167819_95196402_-(Akt3);circRNA_1859|Chr13:95167819_95208329_-(Akt3);circRNA_1860|Chr13:95193009_95196402_-(Akt3);circRNA_1861|Chr13:95193009_95208329_-(Akt3);circRNA_3818|Chr2:240854068_240861760_-(Nfkb1);circRNA_6215|Chr7:130113212_130116591_-(Mapk12);	rno04620
rno04621	NOD-like receptor signaling pathway	Organismal Systems	Immune system	9	327	64	2681	0.377809	0.713007	1.15295	circRNA_0993|Chr10:57627261_57634588_-(Dhx33);circRNA_0994|Chr10:57634023_57634588_-(Dhx33);circRNA_2271|Chr15:34277381_34277914_+(Rnf31);circRNA_3384|Chr2:33933956_33937260_-(Erbin);circRNA_3818|Chr2:240854068_240861760_-(Nfkb1);circRNA_6215|Chr7:130113212_130116591_-(Mapk12);circRNA_6271|Chr8:6014617_6023899_-(Birc2);circRNA_6642|Chr8:117106575_117109692_+(Rhoa);circRNA_6643|Chr8:117109572_1171…	rno04621
rno04622	RIG-I-like receptor signaling pathway	Organismal Systems	Immune system	2	327	23	2681	0.790669	0.906315	0.712937	circRNA_3818|Chr2:240854068_240861760_-(Nfkb1);circRNA_6215|Chr7:130113212_130116591_-(Mapk12);	rno04622
rno04623	Cytosolic DNA-sensing pathway	Organismal Systems	Immune system	1	327	11	2681	0.761568	0.905393	0.745343	circRNA_3818|Chr2:240854068_240861760_-(Nfkb1);	rno04623
rno04625	C-type lectin receptor signaling pathway	Organismal Systems	Immune system	15	327	69	2681	0.0165687	0.151587	1.78234	circRNA_1368|Chr11:51049296_51068978_-(Cblb);circRNA_1369|Chr11:51057506_51068978_-(Cblb);circRNA_1857|Chr13:95120752_95128782_-(Akt3);circRNA_1858|Chr13:95167819_95196402_-(Akt3);circRNA_1859|Chr13:95167819_95208329_-(Akt3);circRNA_1860|Chr13:95193009_95196402_-(Akt3);circRNA_1861|Chr13:95193009_95208329_-(Akt3);circRNA_2334|Chr15:51896716_51944899_-(Ppp3cc);circRNA_2337|Chr15:51925689_51954838_…	rno04625
rno04630	Jak-STAT signaling pathway	Environmental Information Processing	Signal transduction	11	327	52	2681	0.0449078	0.251913	1.73436	circRNA_1168|Chr10:85313576_85314836_+(Socs7);circRNA_1857|Chr13:95120752_95128782_-(Akt3);circRNA_1858|Chr13:95167819_95196402_-(Akt3);circRNA_1859|Chr13:95167819_95208329_-(Akt3);circRNA_1860|Chr13:95193009_95196402_-(Akt3);circRNA_1861|Chr13:95193009_95208329_-(Akt3);circRNA_2158|Chr14:100058305_100066787_+(Egfr);circRNA_3062|Chr18:73479863_73498648_+(Pias2);circRNA_3450|Chr2:56451097_56456188…	rno04630
rno04640	Hematopoietic cell lineage	Organismal Systems	Immune system	1	327	18	2681	0.904563	0.954512	0.455488	circRNA_3428|Chr2:47182739_47203913_-(Itga1);	rno04640
rno04650	Natural killer cell mediated cytotoxicity	Organismal Systems	Immune system	6	327	60	2681	0.758523	0.905393	0.819878	circRNA_2334|Chr15:51896716_51944899_-(Ppp3cc);circRNA_2337|Chr15:51925689_51954838_-(Ppp3cc);circRNA_3872|Chr20:3232306_3273815_+(RT1-T24-3);circRNA_4700|Chr4:67399951_67412670_-(Braf);circRNA_4702|Chr4:67449579_67450836_-(Braf);circRNA_5724|Chr6:91938501_91961861_-(Sos2);	rno04650
rno04657	IL-17 signaling pathway	Organismal Systems	Immune system	3	327	24	2681	0.575094	0.854134	1.02485	circRNA_1119|Chr10:75337353_75340473_+(Srsf1);circRNA_3818|Chr2:240854068_240861760_-(Nfkb1);circRNA_6215|Chr7:130113212_130116591_-(Mapk12);	rno04657
rno04658	Th1 and Th2 cell differentiation	Organismal Systems	Immune system	7	327	43	2681	0.265287	0.584097	1.33468	circRNA_2334|Chr15:51896716_51944899_-(Ppp3cc);circRNA_2337|Chr15:51925689_51954838_-(Ppp3cc);circRNA_3204|Chr19:38057557_38091369_+(Nfatc3);circRNA_3701|Chr2:200243345_200253557_+(Notch2);circRNA_3818|Chr2:240854068_240861760_-(Nfkb1);circRNA_4377|Chr3:130093308_130099815_-(Jag1);circRNA_6215|Chr7:130113212_130116591_-(Mapk12);	rno04658
rno04659	Th17 cell differentiation	Organismal Systems	Immune system	8	327	61	2681	0.471297	0.792626	1.07525	circRNA_2334|Chr15:51896716_51944899_-(Ppp3cc);circRNA_2337|Chr15:51925689_51954838_-(Ppp3cc);circRNA_3031|Chr18:69634006_69647714_-(Smad4);circRNA_3032|Chr18:69634006_69657373_-(Smad4);circRNA_3034|Chr18:69642130_69657373_-(Smad4);circRNA_3204|Chr19:38057557_38091369_+(Nfatc3);circRNA_3818|Chr2:240854068_240861760_-(Nfkb1);circRNA_6215|Chr7:130113212_130116591_-(Mapk12);	rno04659
rno04660	T cell receptor signaling pathway	Organismal Systems	Immune system	15	327	80	2681	0.0558946	0.269799	1.53727	circRNA_1368|Chr11:51049296_51068978_-(Cblb);circRNA_1369|Chr11:51057506_51068978_-(Cblb);circRNA_1857|Chr13:95120752_95128782_-(Akt3);circRNA_1858|Chr13:95167819_95196402_-(Akt3);circRNA_1859|Chr13:95167819_95208329_-(Akt3);circRNA_1860|Chr13:95193009_95196402_-(Akt3);circRNA_1861|Chr13:95193009_95208329_-(Akt3);circRNA_2334|Chr15:51896716_51944899_-(Ppp3cc);circRNA_2337|Chr15:51925689_51954838_…	rno04660
rno04662	B cell receptor signaling pathway	Organismal Systems	Immune system	10	327	58	2681	0.16138	0.455128	1.41358	circRNA_1857|Chr13:95120752_95128782_-(Akt3);circRNA_1858|Chr13:95167819_95196402_-(Akt3);circRNA_1859|Chr13:95167819_95208329_-(Akt3);circRNA_1860|Chr13:95193009_95196402_-(Akt3);circRNA_1861|Chr13:95193009_95208329_-(Akt3);circRNA_2334|Chr15:51896716_51944899_-(Ppp3cc);circRNA_2337|Chr15:51925689_51954838_-(Ppp3cc);circRNA_3204|Chr19:38057557_38091369_+(Nfatc3);circRNA_3818|Chr2:240854068_24086…	rno04662
rno04664	Fc epsilon RI signaling pathway	Organismal Systems	Immune system	8	327	40	2681	0.105423	0.396778	1.63976	circRNA_1762|Chr13:67141798_67143114_-(Pla2g4a);circRNA_1857|Chr13:95120752_95128782_-(Akt3);circRNA_1858|Chr13:95167819_95196402_-(Akt3);circRNA_1859|Chr13:95167819_95208329_-(Akt3);circRNA_1860|Chr13:95193009_95196402_-(Akt3);circRNA_1861|Chr13:95193009_95208329_-(Akt3);circRNA_5724|Chr6:91938501_91961861_-(Sos2);circRNA_6215|Chr7:130113212_130116591_-(Mapk12);	rno04664
rno04666	Fc gamma R-mediated phagocytosis	Organismal Systems	Immune system	9	327	51	2681	0.161065	0.455128	1.44684	circRNA_1762|Chr13:67141798_67143114_-(Pla2g4a);circRNA_1857|Chr13:95120752_95128782_-(Akt3);circRNA_1858|Chr13:95167819_95196402_-(Akt3);circRNA_1859|Chr13:95167819_95208329_-(Akt3);circRNA_1860|Chr13:95193009_95196402_-(Akt3);circRNA_1861|Chr13:95193009_95208329_-(Akt3);circRNA_3512|Chr2:113739689_113745181_+(Pld1);circRNA_3515|Chr2:113747182_113764892_+(Pld1);circRNA_6293|Chr8:22509215_2251308…	rno04666
rno04668	TNF signaling pathway	Environmental Information Processing	Signal transduction	13	327	65	2681	0.0463192	0.251913	1.63976	circRNA_1857|Chr13:95120752_95128782_-(Akt3);circRNA_1858|Chr13:95167819_95196402_-(Akt3);circRNA_1859|Chr13:95167819_95208329_-(Akt3);circRNA_1860|Chr13:95193009_95196402_-(Akt3);circRNA_1861|Chr13:95193009_95208329_-(Akt3);circRNA_3818|Chr2:240854068_240861760_-(Nfkb1);circRNA_4377|Chr3:130093308_130099815_-(Jag1);circRNA_4426|Chr3:150692740_150696569_+(Itch);circRNA_4428|Chr3:150717267_1507253…	rno04668
rno04670	Leukocyte transendothelial migration	Organismal Systems	Immune system	7	327	63	2681	0.663647	0.89556	0.910975	circRNA_2837|Chr18:1337228_1354828_-(Rock1);circRNA_5677|Chr6:73357940_73385888_+(Arhgap5);circRNA_5754|Chr6:103389817_103393554_-(Actn1);circRNA_6155|Chr7:114555889_114562987_-(Ptk2);circRNA_6215|Chr7:130113212_130116591_-(Mapk12);circRNA_6642|Chr8:117106575_117109692_+(Rhoa);circRNA_6643|Chr8:117109572_117114039_+(Rhoa);	rno04670
rno04713	Circadian entrainment	Organismal Systems	Environmental adaptation	15	327	77	2681	0.0416677	0.249014	1.59716	circRNA_0839|Chr10:5930383_5930975_+(Grin2a);circRNA_1398|Chr11:68722906_68730129_-(Adcy5);circRNA_1399|Chr11:68745884_68750272_-(Adcy5);circRNA_2141|Chr14:87328008_87331877_+(Adcy1);circRNA_2142|Chr14:87328008_87357732_+(Adcy1);circRNA_2143|Chr14:87328008_87377952_+(Adcy1);circRNA_2144|Chr14:87331763_87357732_+(Adcy1);circRNA_2145|Chr14:87350088_87357732_+(Adcy1);circRNA_3796|Chr2:231078900_2311…	rno04713
rno04714	Thermogenesis	Organismal Systems	Environmental adaptation	10	327	74	2681	0.415828	0.746676	1.10794	circRNA_1398|Chr11:68722906_68730129_-(Adcy5);circRNA_1399|Chr11:68745884_68750272_-(Adcy5);circRNA_2141|Chr14:87328008_87331877_+(Adcy1);circRNA_2142|Chr14:87328008_87357732_+(Adcy1);circRNA_2143|Chr14:87328008_87377952_+(Adcy1);circRNA_2144|Chr14:87331763_87357732_+(Adcy1);circRNA_2145|Chr14:87350088_87357732_+(Adcy1);circRNA_4518|Chr4:6866069_6869642_+(Rheb);circRNA_5724|Chr6:91938501_91961861…	rno04714
rno04720	Long-term potentiation	Organismal Systems	Nervous system	11	327	77	2681	0.334732	0.677799	1.17125	circRNA_0839|Chr10:5930383_5930975_+(Grin2a);circRNA_2141|Chr14:87328008_87331877_+(Adcy1);circRNA_2142|Chr14:87328008_87357732_+(Adcy1);circRNA_2143|Chr14:87328008_87377952_+(Adcy1);circRNA_2144|Chr14:87331763_87357732_+(Adcy1);circRNA_2145|Chr14:87350088_87357732_+(Adcy1);circRNA_2334|Chr15:51896716_51944899_-(Ppp3cc);circRNA_2337|Chr15:51925689_51954838_-(Ppp3cc);circRNA_3796|Chr2:231078900_23…	rno04720
rno04721	Synaptic vesicle cycle	Organismal Systems	Nervous system	4	327	27	2681	0.422422	0.746676	1.21463	circRNA_0193|Chr1:100913425_100914082_-(Ap2a1);circRNA_0878|Chr10:16769713_16774652_-(Atp6v0e1);circRNA_3140|Chr19:25721379_25722171_+(Cacna1a);circRNA_6293|Chr8:22509215_22513080_+(Dnm2);	rno04721
rno04722	Neurotrophin signaling pathway	Organismal Systems	Nervous system	18	327	90	2681	0.0211376	0.151587	1.63976	circRNA_0259|Chr1:139943398_139956356_-(Ntrk3);circRNA_1039|Chr10:63908528_63915032_+(Ywhae);circRNA_1857|Chr13:95120752_95128782_-(Akt3);circRNA_1858|Chr13:95167819_95196402_-(Akt3);circRNA_1859|Chr13:95167819_95208329_-(Akt3);circRNA_1860|Chr13:95193009_95196402_-(Akt3);circRNA_1861|Chr13:95193009_95208329_-(Akt3);circRNA_3150|Chr19:30869716_30883569_+(Gab1);circRNA_3796|Chr2:231078900_23112870…	rno04722
rno04723	Retrograde endocannabinoid signaling	Organismal Systems	Nervous system	9	327	54	2681	0.205208	0.5164	1.36646	circRNA_1398|Chr11:68722906_68730129_-(Adcy5);circRNA_1399|Chr11:68745884_68750272_-(Adcy5);circRNA_2141|Chr14:87328008_87331877_+(Adcy1);circRNA_2142|Chr14:87328008_87357732_+(Adcy1);circRNA_2143|Chr14:87328008_87377952_+(Adcy1);circRNA_2144|Chr14:87331763_87357732_+(Adcy1);circRNA_2145|Chr14:87350088_87357732_+(Adcy1);circRNA_3140|Chr19:25721379_25722171_+(Cacna1a);circRNA_6215|Chr7:130113212_1…	rno04723
rno04724	Glutamatergic synapse	Organismal Systems	Nervous system	16	327	77	2681	0.0205851	0.151587	1.70364	circRNA_0839|Chr10:5930383_5930975_+(Grin2a);circRNA_1398|Chr11:68722906_68730129_-(Adcy5);circRNA_1399|Chr11:68745884_68750272_-(Adcy5);circRNA_1762|Chr13:67141798_67143114_-(Pla2g4a);circRNA_2141|Chr14:87328008_87331877_+(Adcy1);circRNA_2142|Chr14:87328008_87357732_+(Adcy1);circRNA_2143|Chr14:87328008_87377952_+(Adcy1);circRNA_2144|Chr14:87331763_87357732_+(Adcy1);circRNA_2145|Chr14:87350088_87…	rno04724
rno04725	Cholinergic synapse	Organismal Systems	Nervous system	14	327	61	2681	0.0127228	0.151587	1.88169	circRNA_1398|Chr11:68722906_68730129_-(Adcy5);circRNA_1399|Chr11:68745884_68750272_-(Adcy5);circRNA_1857|Chr13:95120752_95128782_-(Akt3);circRNA_1858|Chr13:95167819_95196402_-(Akt3);circRNA_1859|Chr13:95167819_95208329_-(Akt3);circRNA_1860|Chr13:95193009_95196402_-(Akt3);circRNA_1861|Chr13:95193009_95208329_-(Akt3);circRNA_2141|Chr14:87328008_87331877_+(Adcy1);circRNA_2142|Chr14:87328008_87357732…	rno04725
rno04726	Serotonergic synapse	Organismal Systems	Nervous system	8	327	59	2681	0.432375	0.753654	1.1117	circRNA_1301|Chr11:24527899_24550752_-(App);circRNA_1302|Chr11:24547990_24550752_-(App);circRNA_1398|Chr11:68722906_68730129_-(Adcy5);circRNA_1399|Chr11:68745884_68750272_-(Adcy5);circRNA_1762|Chr13:67141798_67143114_-(Pla2g4a);circRNA_3140|Chr19:25721379_25722171_+(Cacna1a);circRNA_4700|Chr4:67399951_67412670_-(Braf);circRNA_4702|Chr4:67449579_67450836_-(Braf);	rno04726
rno04727	GABAergic synapse	Organismal Systems	Nervous system	10	327	35	2681	0.0070265	0.116937	2.34251	circRNA_1398|Chr11:68722906_68730129_-(Adcy5);circRNA_1399|Chr11:68745884_68750272_-(Adcy5);circRNA_2141|Chr14:87328008_87331877_+(Adcy1);circRNA_2142|Chr14:87328008_87357732_+(Adcy1);circRNA_2143|Chr14:87328008_87377952_+(Adcy1);circRNA_2144|Chr14:87331763_87357732_+(Adcy1);circRNA_2145|Chr14:87350088_87357732_+(Adcy1);circRNA_3140|Chr19:25721379_25722171_+(Cacna1a);circRNA_6236|Chr7:138002505_1…	rno04727
rno04728	Dopaminergic synapse	Organismal Systems	Nervous system	13	327	85	2681	0.230301	0.542191	1.25393	circRNA_0839|Chr10:5930383_5930975_+(Grin2a);circRNA_1398|Chr11:68722906_68730129_-(Adcy5);circRNA_1399|Chr11:68745884_68750272_-(Adcy5);circRNA_1857|Chr13:95120752_95128782_-(Akt3);circRNA_1858|Chr13:95167819_95196402_-(Akt3);circRNA_1859|Chr13:95167819_95208329_-(Akt3);circRNA_1860|Chr13:95193009_95196402_-(Akt3);circRNA_1861|Chr13:95193009_95208329_-(Akt3);circRNA_2334|Chr15:51896716_51944899_…	rno04728
rno04730	Long-term depression	Organismal Systems	Nervous system	5	327	48	2681	0.714255	0.905393	0.854039	circRNA_1762|Chr13:67141798_67143114_-(Pla2g4a);circRNA_3140|Chr19:25721379_25722171_+(Cacna1a);circRNA_3927|Chr20:14618775_14619985_-(Gnaz);circRNA_4700|Chr4:67399951_67412670_-(Braf);circRNA_4702|Chr4:67449579_67450836_-(Braf);	rno04730
rno04740	Olfactory transduction	Organismal Systems	Sensory system	5	327	20	2681	0.0866783	0.350908	2.04969	circRNA_3796|Chr2:231078900_231128709_+(Camk2d);circRNA_5502|Chr6:4259110_4315062_-(Slc8a1);circRNA_5503|Chr6:4278307_4315062_-(Slc8a1);circRNA_5504|Chr6:4298605_4315062_-(Slc8a1);circRNA_6105|Chr7:76229137_76229533_-(Ncald);	rno04740
rno04742	Taste transduction	Organismal Systems	Sensory system	1	327	8	2681	0.647267	0.882957	1.02485	circRNA_3140|Chr19:25721379_25722171_+(Cacna1a);	rno04742
rno04750	Inflammatory mediator regulation of TRP channels	Organismal Systems	Sensory system	10	327	52	2681	0.0933436	0.371893	1.57669	circRNA_1398|Chr11:68722906_68730129_-(Adcy5);circRNA_1399|Chr11:68745884_68750272_-(Adcy5);circRNA_1762|Chr13:67141798_67143114_-(Pla2g4a);circRNA_2141|Chr14:87328008_87331877_+(Adcy1);circRNA_2142|Chr14:87328008_87357732_+(Adcy1);circRNA_2143|Chr14:87328008_87377952_+(Adcy1);circRNA_2144|Chr14:87331763_87357732_+(Adcy1);circRNA_2145|Chr14:87350088_87357732_+(Adcy1);circRNA_3796|Chr2:231078900_2…	rno04750
rno04810	Regulation of actin cytoskeleton	Cellular Processes	Cell motility	23	327	174	2681	0.370834	0.713007	1.08375	circRNA_0451|Chr1:200671013_200672411_-(Fgfr2);circRNA_1304|Chr11:29967593_29992834_-(Tiam1);circRNA_1405|Chr11:69064518_69068514_-(Mylk);circRNA_1875|Chr13:100300002_100353039_-(Enah);circRNA_2158|Chr14:100058305_100066787_+(Egfr);circRNA_2588|Chr16:83050847_83058847_-(Arhgef7);circRNA_2837|Chr18:1337228_1354828_-(Rock1);circRNA_3428|Chr2:47182739_47203913_-(Itga1);circRNA_4212|Chr3:71143189_711…	rno04810
rno04910	Insulin signaling pathway	Organismal Systems	Endocrine system	15	327	100	2681	0.231133	0.542191	1.22982	circRNA_0380|Chr1:184008119_184017761_+(Pde3b);circRNA_0691|Chr1:259396273_259437470_-(Sorbs1);circRNA_0696|Chr1:259412482_259459540_-(Sorbs1);circRNA_0710|Chr1:259450673_259469248_-(Sorbs1);circRNA_1368|Chr11:51049296_51068978_-(Cblb);circRNA_1369|Chr11:51057506_51068978_-(Cblb);circRNA_1857|Chr13:95120752_95128782_-(Akt3);circRNA_1858|Chr13:95167819_95196402_-(Akt3);circRNA_1859|Chr13:95167819_…	rno04910
rno04911	Insulin secretion	Organismal Systems	Endocrine system	8	327	56	2681	0.37361	0.713007	1.17125	circRNA_1398|Chr11:68722906_68730129_-(Adcy5);circRNA_1399|Chr11:68745884_68750272_-(Adcy5);circRNA_2141|Chr14:87328008_87331877_+(Adcy1);circRNA_2142|Chr14:87328008_87357732_+(Adcy1);circRNA_2143|Chr14:87328008_87377952_+(Adcy1);circRNA_2144|Chr14:87331763_87357732_+(Adcy1);circRNA_2145|Chr14:87350088_87357732_+(Adcy1);circRNA_3796|Chr2:231078900_231128709_+(Camk2d);	rno04911
rno04912	GnRH signaling pathway	Organismal Systems	Endocrine system	14	327	83	2681	0.126792	0.408011	1.38293	circRNA_1398|Chr11:68722906_68730129_-(Adcy5);circRNA_1399|Chr11:68745884_68750272_-(Adcy5);circRNA_1762|Chr13:67141798_67143114_-(Pla2g4a);circRNA_2141|Chr14:87328008_87331877_+(Adcy1);circRNA_2142|Chr14:87328008_87357732_+(Adcy1);circRNA_2143|Chr14:87328008_87377952_+(Adcy1);circRNA_2144|Chr14:87331763_87357732_+(Adcy1);circRNA_2145|Chr14:87350088_87357732_+(Adcy1);circRNA_2158|Chr14:100058305_…	rno04912
rno04913	Ovarian Steroidogenesis	Organismal Systems	Endocrine system	8	327	19	2681	0.00100763	0.0281015	3.45212	circRNA_1398|Chr11:68722906_68730129_-(Adcy5);circRNA_1399|Chr11:68745884_68750272_-(Adcy5);circRNA_1762|Chr13:67141798_67143114_-(Pla2g4a);circRNA_2141|Chr14:87328008_87331877_+(Adcy1);circRNA_2142|Chr14:87328008_87357732_+(Adcy1);circRNA_2143|Chr14:87328008_87377952_+(Adcy1);circRNA_2144|Chr14:87331763_87357732_+(Adcy1);circRNA_2145|Chr14:87350088_87357732_+(Adcy1);	rno04913
rno04914	Progesterone-mediated oocyte maturation	Organismal Systems	Endocrine system	17	327	59	2681	0.000425889	0.0164022	2.36236	circRNA_0380|Chr1:184008119_184017761_+(Pde3b);circRNA_0661|Chr1:255685048_255694514_-(Cpeb3);circRNA_1398|Chr11:68722906_68730129_-(Adcy5);circRNA_1399|Chr11:68745884_68750272_-(Adcy5);circRNA_1857|Chr13:95120752_95128782_-(Akt3);circRNA_1858|Chr13:95167819_95196402_-(Akt3);circRNA_1859|Chr13:95167819_95208329_-(Akt3);circRNA_1860|Chr13:95193009_95196402_-(Akt3);circRNA_1861|Chr13:95193009_95208…	rno04914
rno04915	Estrogen signaling pathway	Organismal Systems	Endocrine system	14	327	67	2681	0.0280556	0.190122	1.71318	circRNA_1398|Chr11:68722906_68730129_-(Adcy5);circRNA_1399|Chr11:68745884_68750272_-(Adcy5);circRNA_1857|Chr13:95120752_95128782_-(Akt3);circRNA_1858|Chr13:95167819_95196402_-(Akt3);circRNA_1859|Chr13:95167819_95208329_-(Akt3);circRNA_1860|Chr13:95193009_95196402_-(Akt3);circRNA_1861|Chr13:95193009_95208329_-(Akt3);circRNA_2141|Chr14:87328008_87331877_+(Adcy1);circRNA_2142|Chr14:87328008_87357732…	rno04915
rno04916	Melanogenesis	Organismal Systems	Endocrine system	8	327	48	2681	0.224156	0.535839	1.36646	circRNA_1398|Chr11:68722906_68730129_-(Adcy5);circRNA_1399|Chr11:68745884_68750272_-(Adcy5);circRNA_2141|Chr14:87328008_87331877_+(Adcy1);circRNA_2142|Chr14:87328008_87357732_+(Adcy1);circRNA_2143|Chr14:87328008_87377952_+(Adcy1);circRNA_2144|Chr14:87331763_87357732_+(Adcy1);circRNA_2145|Chr14:87350088_87357732_+(Adcy1);circRNA_3796|Chr2:231078900_231128709_+(Camk2d);	rno04916
rno04917	Prolactin signaling pathway	Organismal Systems	Endocrine system	9	327	33	2681	0.0142746	0.151587	2.23603	circRNA_1168|Chr10:85313576_85314836_+(Socs7);circRNA_1857|Chr13:95120752_95128782_-(Akt3);circRNA_1858|Chr13:95167819_95196402_-(Akt3);circRNA_1859|Chr13:95167819_95208329_-(Akt3);circRNA_1860|Chr13:95193009_95196402_-(Akt3);circRNA_1861|Chr13:95193009_95208329_-(Akt3);circRNA_3818|Chr2:240854068_240861760_-(Nfkb1);circRNA_5724|Chr6:91938501_91961861_-(Sos2);circRNA_6215|Chr7:130113212_130116591…	rno04917
rno04918	Thyroid hormone synthesis	Organismal Systems	Endocrine system	8	327	46	2681	0.190682	0.503801	1.42587	circRNA_1398|Chr11:68722906_68730129_-(Adcy5);circRNA_1399|Chr11:68745884_68750272_-(Adcy5);circRNA_2141|Chr14:87328008_87331877_+(Adcy1);circRNA_2142|Chr14:87328008_87357732_+(Adcy1);circRNA_2143|Chr14:87328008_87377952_+(Adcy1);circRNA_2144|Chr14:87331763_87357732_+(Adcy1);circRNA_2145|Chr14:87350088_87357732_+(Adcy1);circRNA_2559|Chr16:62222412_62226174_-(Gsr);	rno04918
rno04919	Thyroid hormone signaling pathway	Organismal Systems	Endocrine system	9	327	88	2681	0.764715	0.905393	0.838511	circRNA_1857|Chr13:95120752_95128782_-(Akt3);circRNA_1858|Chr13:95167819_95196402_-(Akt3);circRNA_1859|Chr13:95167819_95208329_-(Akt3);circRNA_1860|Chr13:95193009_95196402_-(Akt3);circRNA_1861|Chr13:95193009_95208329_-(Akt3);circRNA_3701|Chr2:200243345_200253557_+(Notch2);circRNA_3998|Chr20:45189472_45193661_-(Slc16a10);circRNA_4212|Chr3:71143189_71149475_+(Itgav);circRNA_4518|Chr4:6866069_686964…	rno04919
rno04920	Adipocytokine signaling pathway	Organismal Systems	Endocrine system	6	327	30	2681	0.150146	0.443373	1.63976	circRNA_1857|Chr13:95120752_95128782_-(Akt3);circRNA_1858|Chr13:95167819_95196402_-(Akt3);circRNA_1859|Chr13:95167819_95208329_-(Akt3);circRNA_1860|Chr13:95193009_95196402_-(Akt3);circRNA_1861|Chr13:95193009_95208329_-(Akt3);circRNA_3818|Chr2:240854068_240861760_-(Nfkb1);	rno04920
rno04921	Oxytocin signaling pathway	Organismal Systems	Endocrine system	25	327	140	2681	0.0287834	0.190122	1.46407	circRNA_1398|Chr11:68722906_68730129_-(Adcy5);circRNA_1399|Chr11:68745884_68750272_-(Adcy5);circRNA_1405|Chr11:69064518_69068514_-(Mylk);circRNA_1762|Chr13:67141798_67143114_-(Pla2g4a);circRNA_2141|Chr14:87328008_87331877_+(Adcy1);circRNA_2142|Chr14:87328008_87357732_+(Adcy1);circRNA_2143|Chr14:87328008_87377952_+(Adcy1);circRNA_2144|Chr14:87331763_87357732_+(Adcy1);circRNA_2145|Chr14:87350088_87…	rno04921
rno04922	Glucagon signaling pathway	Organismal Systems	Endocrine system	9	327	88	2681	0.764715	0.905393	0.838511	circRNA_0380|Chr1:184008119_184017761_+(Pde3b);circRNA_1857|Chr13:95120752_95128782_-(Akt3);circRNA_1858|Chr13:95167819_95196402_-(Akt3);circRNA_1859|Chr13:95167819_95208329_-(Akt3);circRNA_1860|Chr13:95193009_95196402_-(Akt3);circRNA_1861|Chr13:95193009_95208329_-(Akt3);circRNA_2334|Chr15:51896716_51944899_-(Ppp3cc);circRNA_2337|Chr15:51925689_51954838_-(Ppp3cc);circRNA_3796|Chr2:231078900_23112…	rno04922
rno04923	Regulation of lipolysis in adipocyte	Organismal Systems	Endocrine system	13	327	35	2681	0.000124966	0.00904843	3.04526	circRNA_0380|Chr1:184008119_184017761_+(Pde3b);circRNA_1398|Chr11:68722906_68730129_-(Adcy5);circRNA_1399|Chr11:68745884_68750272_-(Adcy5);circRNA_1857|Chr13:95120752_95128782_-(Akt3);circRNA_1858|Chr13:95167819_95196402_-(Akt3);circRNA_1859|Chr13:95167819_95208329_-(Akt3);circRNA_1860|Chr13:95193009_95196402_-(Akt3);circRNA_1861|Chr13:95193009_95208329_-(Akt3);circRNA_2141|Chr14:87328008_8733187…	rno04923
rno04924	Renin secretion	Organismal Systems	Endocrine system	5	327	65	2681	0.913386	0.954512	0.630675	circRNA_0380|Chr1:184008119_184017761_+(Pde3b);circRNA_1398|Chr11:68722906_68730129_-(Adcy5);circRNA_1399|Chr11:68745884_68750272_-(Adcy5);circRNA_2334|Chr15:51896716_51944899_-(Ppp3cc);circRNA_2337|Chr15:51925689_51954838_-(Ppp3cc);	rno04924
rno04925	Aldosterone synthesis and secretion	Organismal Systems	Endocrine system	10	327	62	2681	0.21724	0.529815	1.32238	circRNA_1398|Chr11:68722906_68730129_-(Adcy5);circRNA_1399|Chr11:68745884_68750272_-(Adcy5);circRNA_1725|Chr13:50150091_50150276_-(Atp2b4);circRNA_2141|Chr14:87328008_87331877_+(Adcy1);circRNA_2142|Chr14:87328008_87357732_+(Adcy1);circRNA_2143|Chr14:87328008_87377952_+(Adcy1);circRNA_2144|Chr14:87331763_87357732_+(Adcy1);circRNA_2145|Chr14:87350088_87357732_+(Adcy1);circRNA_3796|Chr2:231078900_23…	rno04925
rno04926	Relaxin signaling pathway	Organismal Systems	Endocrine system	17	327	104	2681	0.12368	0.408011	1.34018	circRNA_1151|Chr10:82753666_82754365_+(Col1a1);circRNA_1398|Chr11:68722906_68730129_-(Adcy5);circRNA_1399|Chr11:68745884_68750272_-(Adcy5);circRNA_1857|Chr13:95120752_95128782_-(Akt3);circRNA_1858|Chr13:95167819_95196402_-(Akt3);circRNA_1859|Chr13:95167819_95208329_-(Akt3);circRNA_1860|Chr13:95193009_95196402_-(Akt3);circRNA_1861|Chr13:95193009_95208329_-(Akt3);circRNA_2141|Chr14:87328008_8733187…	rno04926
rno04927	Cortisol synthesis and secretion	Organismal Systems	Endocrine system	10	327	49	2681	0.0671749	0.300497	1.67322	circRNA_1398|Chr11:68722906_68730129_-(Adcy5);circRNA_1399|Chr11:68745884_68750272_-(Adcy5);circRNA_1843|Chr13:86424477_86436725_-(Pbx1);circRNA_1845|Chr13:86432220_86451001_-(Pbx1);circRNA_1846|Chr13:86444740_86451001_-(Pbx1);circRNA_2141|Chr14:87328008_87331877_+(Adcy1);circRNA_2142|Chr14:87328008_87357732_+(Adcy1);circRNA_2143|Chr14:87328008_87377952_+(Adcy1);circRNA_2144|Chr14:87331763_873577…	rno04927
rno04930	Type II diabetes mellitus	Human Diseases	Endocrine and metabolic disease	1	327	18	2681	0.904563	0.954512	0.455488	circRNA_3140|Chr19:25721379_25722171_+(Cacna1a);	rno04930
rno04931	Insulin resistance	Human Diseases	Endocrine and metabolic disease	6	327	51	2681	0.603136	0.856531	0.964562	circRNA_1857|Chr13:95120752_95128782_-(Akt3);circRNA_1858|Chr13:95167819_95196402_-(Akt3);circRNA_1859|Chr13:95167819_95208329_-(Akt3);circRNA_1860|Chr13:95193009_95196402_-(Akt3);circRNA_1861|Chr13:95193009_95208329_-(Akt3);circRNA_3818|Chr2:240854068_240861760_-(Nfkb1);	rno04931
rno04932	Non-alcoholic fatty liver disease (NAFLD)	Human Diseases	Endocrine and metabolic disease	9	327	59	2681	0.287945	0.612494	1.25066	circRNA_1857|Chr13:95120752_95128782_-(Akt3);circRNA_1858|Chr13:95167819_95196402_-(Akt3);circRNA_1859|Chr13:95167819_95208329_-(Akt3);circRNA_1860|Chr13:95193009_95196402_-(Akt3);circRNA_1861|Chr13:95193009_95208329_-(Akt3);circRNA_3818|Chr2:240854068_240861760_-(Nfkb1);circRNA_4426|Chr3:150692740_150696569_+(Itch);circRNA_4428|Chr3:150717267_150725392_+(Itch);circRNA_4430|Chr3:150717267_1507347…	rno04932
rno04933	AGE-RAGE signaling pathway in diabetic complications	Human Diseases	Endocrine and metabolic disease	11	327	94	2681	0.608169	0.856531	0.959431	circRNA_1151|Chr10:82753666_82754365_+(Col1a1);circRNA_1857|Chr13:95120752_95128782_-(Akt3);circRNA_1858|Chr13:95167819_95196402_-(Akt3);circRNA_1859|Chr13:95167819_95208329_-(Akt3);circRNA_1860|Chr13:95193009_95196402_-(Akt3);circRNA_1861|Chr13:95193009_95208329_-(Akt3);circRNA_3031|Chr18:69634006_69647714_-(Smad4);circRNA_3032|Chr18:69634006_69657373_-(Smad4);circRNA_3034|Chr18:69642130_6965737…	rno04933
rno04934	Cushing's syndrome	Human Diseases	Endocrine and metabolic disease	15	327	79	2681	0.0508252	0.259151	1.55673	circRNA_1398|Chr11:68722906_68730129_-(Adcy5);circRNA_1399|Chr11:68745884_68750272_-(Adcy5);circRNA_1843|Chr13:86424477_86436725_-(Pbx1);circRNA_1845|Chr13:86432220_86451001_-(Pbx1);circRNA_1846|Chr13:86444740_86451001_-(Pbx1);circRNA_2141|Chr14:87328008_87331877_+(Adcy1);circRNA_2142|Chr14:87328008_87357732_+(Adcy1);circRNA_2143|Chr14:87328008_87377952_+(Adcy1);circRNA_2144|Chr14:87331763_873577…	rno04934
rno04940	Type I diabetes mellitus	Human Diseases	Endocrine and metabolic disease	2	327	15	2681	0.562382	0.845257	1.09317	circRNA_3872|Chr20:3232306_3273815_+(RT1-T24-3);circRNA_4603|Chr4:34740521_34761519_-(Ica1);	rno04940
rno04961	Endocrine and other factor-regulated calcium reabsorption	Organismal Systems	Excretory system	5	327	39	2681	0.525817	0.819762	1.05113	circRNA_0193|Chr1:100913425_100914082_-(Ap2a1);circRNA_5502|Chr6:4259110_4315062_-(Slc8a1);circRNA_5503|Chr6:4278307_4315062_-(Slc8a1);circRNA_5504|Chr6:4298605_4315062_-(Slc8a1);circRNA_6293|Chr8:22509215_22513080_+(Dnm2);	rno04961
rno04962	Vasopressin-regulated water reabsorption	Organismal Systems	Excretory system	1	327	13	2681	0.816404	0.917816	0.630675	circRNA_4768|Chr4:114879427_114880228_+(Dctn1);	rno04962
rno04964	Proximal tubule bicarbonate reclamation	Organismal Systems	Excretory system	2	327	10	2681	0.349439	0.690623	1.63976	circRNA_1989|Chr14:20749845_20769564_-(Slc4a4);circRNA_6847|Chr9:54232163_54248877_+(Gls);	rno04964
rno04970	Salivary secretion	Organismal Systems	Digestive system	13	327	67	2681	0.0572514	0.271134	1.59081	circRNA_1398|Chr11:68722906_68730129_-(Adcy5);circRNA_1399|Chr11:68745884_68750272_-(Adcy5);circRNA_1725|Chr13:50150091_50150276_-(Atp2b4);circRNA_2141|Chr14:87328008_87331877_+(Adcy1);circRNA_2142|Chr14:87328008_87357732_+(Adcy1);circRNA_2143|Chr14:87328008_87377952_+(Adcy1);circRNA_2144|Chr14:87331763_87357732_+(Adcy1);circRNA_2145|Chr14:87350088_87357732_+(Adcy1);circRNA_4270|Chr3:104125824_10…	rno04970
rno04971	Gastric acid secretion	Organismal Systems	Digestive system	9	327	49	2681	0.134481	0.427274	1.5059	circRNA_1398|Chr11:68722906_68730129_-(Adcy5);circRNA_1399|Chr11:68745884_68750272_-(Adcy5);circRNA_1405|Chr11:69064518_69068514_-(Mylk);circRNA_2141|Chr14:87328008_87331877_+(Adcy1);circRNA_2142|Chr14:87328008_87357732_+(Adcy1);circRNA_2143|Chr14:87328008_87377952_+(Adcy1);circRNA_2144|Chr14:87331763_87357732_+(Adcy1);circRNA_2145|Chr14:87350088_87357732_+(Adcy1);circRNA_3796|Chr2:231078900_2311…	rno04971
rno04972	Pancreatic secretion	Organismal Systems	Digestive system	11	327	55	2681	0.0639183	0.2917	1.63976	circRNA_1398|Chr11:68722906_68730129_-(Adcy5);circRNA_1399|Chr11:68745884_68750272_-(Adcy5);circRNA_1725|Chr13:50150091_50150276_-(Atp2b4);circRNA_1989|Chr14:20749845_20769564_-(Slc4a4);circRNA_2141|Chr14:87328008_87331877_+(Adcy1);circRNA_2142|Chr14:87328008_87357732_+(Adcy1);circRNA_2143|Chr14:87328008_87377952_+(Adcy1);circRNA_2144|Chr14:87331763_87357732_+(Adcy1);circRNA_2145|Chr14:87350088_8…	rno04972
rno04973	Carbohydrate digestion and absorption	Organismal Systems	Digestive system	5	327	17	2681	0.046815	0.251913	2.4114	circRNA_1857|Chr13:95120752_95128782_-(Akt3);circRNA_1858|Chr13:95167819_95196402_-(Akt3);circRNA_1859|Chr13:95167819_95208329_-(Akt3);circRNA_1860|Chr13:95193009_95196402_-(Akt3);circRNA_1861|Chr13:95193009_95208329_-(Akt3);	rno04973
rno04974	Protein digestion and absorption	Organismal Systems	Digestive system	5	327	58	2681	0.853824	0.937057	0.706791	circRNA_1151|Chr10:82753666_82754365_+(Col1a1);circRNA_3998|Chr20:45189472_45193661_-(Slc16a10);circRNA_5502|Chr6:4259110_4315062_-(Slc8a1);circRNA_5503|Chr6:4278307_4315062_-(Slc8a1);circRNA_5504|Chr6:4298605_4315062_-(Slc8a1);	rno04974
rno04975	Fat digestion and absorption	Organismal Systems	Digestive system	3	327	8	2681	0.0630513	0.2917	3.07454	circRNA_5101|Chr5:69929580_69966907_-(Abca1);circRNA_5102|Chr5:69951194_69956147_-(Abca1);circRNA_5103|Chr5:69951194_69966907_-(Abca1);	rno04975
rno04976	Bile secretion	Organismal Systems	Digestive system	8	327	19	2681	0.00100763	0.0281015	3.45212	circRNA_1398|Chr11:68722906_68730129_-(Adcy5);circRNA_1399|Chr11:68745884_68750272_-(Adcy5);circRNA_1989|Chr14:20749845_20769564_-(Slc4a4);circRNA_2141|Chr14:87328008_87331877_+(Adcy1);circRNA_2142|Chr14:87328008_87357732_+(Adcy1);circRNA_2143|Chr14:87328008_87377952_+(Adcy1);circRNA_2144|Chr14:87331763_87357732_+(Adcy1);circRNA_2145|Chr14:87350088_87357732_+(Adcy1);	rno04976
rno04978	Mineral absorption	Organismal Systems	Digestive system	3	327	11	2681	0.141353	0.43802	2.23603	circRNA_5502|Chr6:4259110_4315062_-(Slc8a1);circRNA_5503|Chr6:4278307_4315062_-(Slc8a1);circRNA_5504|Chr6:4298605_4315062_-(Slc8a1);	rno04978
rno04979	Cholesterol metabolism	Organismal Systems	Digestive system	3	327	10	2681	0.112526	0.397185	2.45963	circRNA_5101|Chr5:69929580_69966907_-(Abca1);circRNA_5102|Chr5:69951194_69956147_-(Abca1);circRNA_5103|Chr5:69951194_69966907_-(Abca1);	rno04979
rno05010	Alzheimer's disease	Human Diseases	Neurodegenerative disease	13	327	92	2681	0.327864	0.677274	1.15852	circRNA_0666|Chr1:255931357_255935277_-(Ide);circRNA_0668|Chr1:255942367_255958835_-(Ide);circRNA_0671|Chr1:255970949_255976428_-(Ide);circRNA_0839|Chr10:5930383_5930975_+(Grin2a);circRNA_1301|Chr11:24527899_24550752_-(App);circRNA_1302|Chr11:24547990_24550752_-(App);circRNA_2334|Chr15:51896716_51944899_-(Ppp3cc);circRNA_2337|Chr15:51925689_51954838_-(Ppp3cc);circRNA_4270|Chr3:104125824_104126822…	rno05010
rno05012	Parkinson's disease	Human Diseases	Neurodegenerative disease	4	327	20	2681	0.220683	0.53261	1.63976	circRNA_0999|Chr10:59192184_59239990_+(Ube2g1);circRNA_1398|Chr11:68722906_68730129_-(Adcy5);circRNA_1399|Chr11:68745884_68750272_-(Adcy5);circRNA_6222|Chr7:132867046_132873732_+(Lrrk2);	rno05012
rno05014	Amyotrophic lateral sclerosis (ALS)	Human Diseases	Neurodegenerative disease	4	327	30	2681	0.506973	0.814723	1.09317	circRNA_0839|Chr10:5930383_5930975_+(Grin2a);circRNA_2334|Chr15:51896716_51944899_-(Ppp3cc);circRNA_2337|Chr15:51925689_51954838_-(Ppp3cc);circRNA_6215|Chr7:130113212_130116591_-(Mapk12);	rno05014
rno05016	Huntington's disease	Human Diseases	Neurodegenerative disease	4	327	61	2681	0.951242	0.965666	0.537625	circRNA_0193|Chr1:100913425_100914082_-(Ap2a1);circRNA_2866|Chr18:6218154_6233603_+(Taf4b);circRNA_4768|Chr4:114879427_114880228_+(Dctn1);circRNA_5881|Chr6:135533315_135544421_+(Rcor1);	rno05016
rno05020	Prion diseases	Human Diseases	Neurodegenerative disease	1	327	9	2681	0.690419	0.902067	0.910975	circRNA_3443|Chr2:54755242_54759947_-(C7);	rno05020
rno05030	Cocaine addiction	Human Diseases	Substance dependence	4	327	15	2681	0.0999017	0.385774	2.18634	circRNA_0839|Chr10:5930383_5930975_+(Grin2a);circRNA_1398|Chr11:68722906_68730129_-(Adcy5);circRNA_1399|Chr11:68745884_68750272_-(Adcy5);circRNA_3818|Chr2:240854068_240861760_-(Nfkb1);	rno05030
rno05031	Amphetamine addiction	Human Diseases	Substance dependence	6	327	45	2681	0.4751	0.792626	1.09317	circRNA_0839|Chr10:5930383_5930975_+(Grin2a);circRNA_1398|Chr11:68722906_68730129_-(Adcy5);circRNA_1399|Chr11:68745884_68750272_-(Adcy5);circRNA_2334|Chr15:51896716_51944899_-(Ppp3cc);circRNA_2337|Chr15:51925689_51954838_-(Ppp3cc);circRNA_3796|Chr2:231078900_231128709_+(Camk2d);	rno05031
rno05032	Morphine addiction	Human Diseases	Substance dependence	11	327	39	2681	0.00530583	0.095126	2.31248	circRNA_0380|Chr1:184008119_184017761_+(Pde3b);circRNA_1398|Chr11:68722906_68730129_-(Adcy5);circRNA_1399|Chr11:68745884_68750272_-(Adcy5);circRNA_2096|Chr14:81267948_81280976_-(Grk4);circRNA_2097|Chr14:81278563_81280976_-(Grk4);circRNA_2141|Chr14:87328008_87331877_+(Adcy1);circRNA_2142|Chr14:87328008_87357732_+(Adcy1);circRNA_2143|Chr14:87328008_87377952_+(Adcy1);circRNA_2144|Chr14:87331763_8735…	rno05032
rno05034	Alcoholism	Human Diseases	Substance dependence	6	327	36	2681	0.270514	0.590426	1.36646	circRNA_0839|Chr10:5930383_5930975_+(Grin2a);circRNA_1398|Chr11:68722906_68730129_-(Adcy5);circRNA_1399|Chr11:68745884_68750272_-(Adcy5);circRNA_4700|Chr4:67399951_67412670_-(Braf);circRNA_4702|Chr4:67449579_67450836_-(Braf);circRNA_5724|Chr6:91938501_91961861_-(Sos2);	rno05034
rno05100	Bacterial invasion of epithelial cells	Human Diseases	Infectious disease: bacterial	12	327	89	2681	0.401545	0.730347	1.10545	circRNA_3150|Chr19:30869716_30883569_+(Gab1);circRNA_3179|Chr19:34249087_34272145_+(Arhgap10);circRNA_3180|Chr19:34249087_34272192_+(Arhgap10);circRNA_3182|Chr19:34266719_34272192_+(Arhgap10);circRNA_3183|Chr19:34270069_34298610_+(Arhgap10);circRNA_6155|Chr7:114555889_114562987_-(Ptk2);circRNA_6293|Chr8:22509215_22513080_+(Dnm2);circRNA_6642|Chr8:117106575_117109692_+(Rhoa);circRNA_6643|Chr8:1171…	rno05100
rno05132	Salmonella infection	Human Diseases	Infectious disease: bacterial	5	327	42	2681	0.594788	0.856531	0.976045	circRNA_2837|Chr18:1337228_1354828_-(Rock1);circRNA_3818|Chr2:240854068_240861760_-(Nfkb1);circRNA_3836|Chr2:248770225_248811031_-(Pkn2);circRNA_5896|Chr6:136348651_136358127_+(Klc1);circRNA_6215|Chr7:130113212_130116591_-(Mapk12);	rno05132
rno05133	Pertussis	Human Diseases	Infectious disease: bacterial	4	327	17	2681	0.143837	0.440281	1.92912	circRNA_3818|Chr2:240854068_240861760_-(Nfkb1);circRNA_6215|Chr7:130113212_130116591_-(Mapk12);circRNA_6642|Chr8:117106575_117109692_+(Rhoa);circRNA_6643|Chr8:117109572_117114039_+(Rhoa);	rno05133
rno05134	Legionellosis	Human Diseases	Infectious disease: bacterial	3	327	13	2681	0.20495	0.5164	1.89203	circRNA_0040|Chr1:16859047_16875754_+(Hbs1l);circRNA_0041|Chr1:16859047_16879498_+(Hbs1l);circRNA_3818|Chr2:240854068_240861760_-(Nfkb1);	rno05134
rno05140	Leishmaniasis	Human Diseases	Infectious disease: parasitic	2	327	13	2681	0.483155	0.792626	1.26135	circRNA_3818|Chr2:240854068_240861760_-(Nfkb1);circRNA_6215|Chr7:130113212_130116591_-(Mapk12);	rno05140
rno05142	Chagas disease (American trypanosomiasis)	Human Diseases	Infectious disease: parasitic	12	327	52	2681	0.0195619	0.151587	1.89203	circRNA_1857|Chr13:95120752_95128782_-(Akt3);circRNA_1858|Chr13:95167819_95196402_-(Akt3);circRNA_1859|Chr13:95167819_95208329_-(Akt3);circRNA_1860|Chr13:95193009_95196402_-(Akt3);circRNA_1861|Chr13:95193009_95208329_-(Akt3);circRNA_2141|Chr14:87328008_87331877_+(Adcy1);circRNA_2142|Chr14:87328008_87357732_+(Adcy1);circRNA_2143|Chr14:87328008_87377952_+(Adcy1);circRNA_2144|Chr14:87331763_87357732…	rno05142
rno05145	Toxoplasmosis	Human Diseases	Infectious disease: parasitic	8	327	34	2681	0.047171	0.251913	1.92912	circRNA_1857|Chr13:95120752_95128782_-(Akt3);circRNA_1858|Chr13:95167819_95196402_-(Akt3);circRNA_1859|Chr13:95167819_95208329_-(Akt3);circRNA_1860|Chr13:95193009_95196402_-(Akt3);circRNA_1861|Chr13:95193009_95208329_-(Akt3);circRNA_3818|Chr2:240854068_240861760_-(Nfkb1);circRNA_6215|Chr7:130113212_130116591_-(Mapk12);circRNA_6271|Chr8:6014617_6023899_-(Birc2);	rno05145
rno05146	Amoebiasis	Human Diseases	Infectious disease: parasitic	9	327	79	2681	0.64054	0.882957	0.934038	circRNA_1151|Chr10:82753666_82754365_+(Col1a1);circRNA_2141|Chr14:87328008_87331877_+(Adcy1);circRNA_2142|Chr14:87328008_87357732_+(Adcy1);circRNA_2143|Chr14:87328008_87377952_+(Adcy1);circRNA_2144|Chr14:87331763_87357732_+(Adcy1);circRNA_2145|Chr14:87350088_87357732_+(Adcy1);circRNA_3818|Chr2:240854068_240861760_-(Nfkb1);circRNA_5754|Chr6:103389817_103393554_-(Actn1);circRNA_6155|Chr7:114555889_…	rno05146
rno05152	Tuberculosis	Human Diseases	Infectious disease: bacterial	14	327	81	2681	0.109091	0.397185	1.41707	circRNA_1857|Chr13:95120752_95128782_-(Akt3);circRNA_1858|Chr13:95167819_95196402_-(Akt3);circRNA_1859|Chr13:95167819_95208329_-(Akt3);circRNA_1860|Chr13:95193009_95196402_-(Akt3);circRNA_1861|Chr13:95193009_95208329_-(Akt3);circRNA_2334|Chr15:51896716_51944899_-(Ppp3cc);circRNA_2337|Chr15:51925689_51954838_-(Ppp3cc);circRNA_3796|Chr2:231078900_231128709_+(Camk2d);circRNA_3818|Chr2:240854068_2408…	rno05152
rno05160	Hepatitis C	Human Diseases	Infectious disease: viral	12	327	59	2681	0.0485969	0.254122	1.66755	circRNA_1857|Chr13:95120752_95128782_-(Akt3);circRNA_1858|Chr13:95167819_95196402_-(Akt3);circRNA_1859|Chr13:95167819_95208329_-(Akt3);circRNA_1860|Chr13:95193009_95196402_-(Akt3);circRNA_1861|Chr13:95193009_95208329_-(Akt3);circRNA_2158|Chr14:100058305_100066787_+(Egfr);circRNA_3818|Chr2:240854068_240861760_-(Nfkb1);circRNA_4700|Chr4:67399951_67412670_-(Braf);circRNA_4702|Chr4:67449579_67450836_…	rno05160
rno05161	Hepatitis B	Human Diseases	Infectious disease: viral	11	327	79	2681	0.36727	0.713007	1.1416	circRNA_1857|Chr13:95120752_95128782_-(Akt3);circRNA_1858|Chr13:95167819_95196402_-(Akt3);circRNA_1859|Chr13:95167819_95208329_-(Akt3);circRNA_1860|Chr13:95193009_95196402_-(Akt3);circRNA_1861|Chr13:95193009_95208329_-(Akt3);circRNA_3031|Chr18:69634006_69647714_-(Smad4);circRNA_3032|Chr18:69634006_69657373_-(Smad4);circRNA_3034|Chr18:69642130_69657373_-(Smad4);circRNA_3204|Chr19:38057557_38091369…	rno05161
rno05162	Measles	Human Diseases	Infectious disease: viral	8	327	28	2681	0.0154431	0.151587	2.34251	circRNA_1368|Chr11:51049296_51068978_-(Cblb);circRNA_1369|Chr11:51057506_51068978_-(Cblb);circRNA_1857|Chr13:95120752_95128782_-(Akt3);circRNA_1858|Chr13:95167819_95196402_-(Akt3);circRNA_1859|Chr13:95167819_95208329_-(Akt3);circRNA_1860|Chr13:95193009_95196402_-(Akt3);circRNA_1861|Chr13:95193009_95208329_-(Akt3);circRNA_3818|Chr2:240854068_240861760_-(Nfkb1);	rno05162
rno05164	Influenza A	Human Diseases	Infectious disease: viral	7	327	67	2681	0.726897	0.905393	0.856589	circRNA_1857|Chr13:95120752_95128782_-(Akt3);circRNA_1858|Chr13:95167819_95196402_-(Akt3);circRNA_1859|Chr13:95167819_95208329_-(Akt3);circRNA_1860|Chr13:95193009_95196402_-(Akt3);circRNA_1861|Chr13:95193009_95208329_-(Akt3);circRNA_3818|Chr2:240854068_240861760_-(Nfkb1);circRNA_6215|Chr7:130113212_130116591_-(Mapk12);	rno05164
rno05165	Human papillomavirus infection	Human Diseases	Infectious disease: viral	20	327	188	2681	0.783318	0.906315	0.87221	circRNA_0216|Chr1:116643750_116660509_+(Ube3a);circRNA_1151|Chr10:82753666_82754365_+(Col1a1);circRNA_1857|Chr13:95120752_95128782_-(Akt3);circRNA_1858|Chr13:95167819_95196402_-(Akt3);circRNA_1859|Chr13:95167819_95208329_-(Akt3);circRNA_1860|Chr13:95193009_95196402_-(Akt3);circRNA_1861|Chr13:95193009_95208329_-(Akt3);circRNA_2158|Chr14:100058305_100066787_+(Egfr);circRNA_3280|Chr19:60370736_60429…	rno05165
rno05166	HTLV-I infection	Human Diseases	Infectious disease: viral	21	327	143	2681	0.207794	0.5164	1.20402	circRNA_1398|Chr11:68722906_68730129_-(Adcy5);circRNA_1399|Chr11:68745884_68750272_-(Adcy5);circRNA_1857|Chr13:95120752_95128782_-(Akt3);circRNA_1858|Chr13:95167819_95196402_-(Akt3);circRNA_1859|Chr13:95167819_95208329_-(Akt3);circRNA_1860|Chr13:95193009_95196402_-(Akt3);circRNA_1861|Chr13:95193009_95208329_-(Akt3);circRNA_2141|Chr14:87328008_87331877_+(Adcy1);circRNA_2142|Chr14:87328008_87357732…	rno05166
rno05167	Kaposi's sarcoma-associated herpesvirus infection	Human Diseases	Infectious disease: viral	11	327	98	2681	0.665209	0.89556	0.920271	circRNA_1857|Chr13:95120752_95128782_-(Akt3);circRNA_1858|Chr13:95167819_95196402_-(Akt3);circRNA_1859|Chr13:95167819_95208329_-(Akt3);circRNA_1860|Chr13:95193009_95196402_-(Akt3);circRNA_1861|Chr13:95193009_95208329_-(Akt3);circRNA_2334|Chr15:51896716_51944899_-(Ppp3cc);circRNA_2337|Chr15:51925689_51954838_-(Ppp3cc);circRNA_3204|Chr19:38057557_38091369_+(Nfatc3);circRNA_3818|Chr2:240854068_24086…	rno05167
rno05168	Herpes simplex infection	Human Diseases	Infectious disease: viral	6	327	64	2681	0.811365	0.917816	0.768635	circRNA_1119|Chr10:75337353_75340473_+(Srsf1);circRNA_1593|Chr12:25431710_25435591_+(Gtf2i);circRNA_1594|Chr12:25442325_25447480_+(Gtf2i);circRNA_2866|Chr18:6218154_6233603_+(Taf4b);circRNA_3818|Chr2:240854068_240861760_-(Nfkb1);circRNA_3872|Chr20:3232306_3273815_+(RT1-T24-3);	rno05168
rno05169	Epstein-Barr virus infection	Human Diseases	Infectious disease: viral	9	327	93	2681	0.819086	0.917816	0.79343	circRNA_1039|Chr10:63908528_63915032_+(Ywhae);circRNA_1857|Chr13:95120752_95128782_-(Akt3);circRNA_1858|Chr13:95167819_95196402_-(Akt3);circRNA_1859|Chr13:95167819_95208329_-(Akt3);circRNA_1860|Chr13:95193009_95196402_-(Akt3);circRNA_1861|Chr13:95193009_95208329_-(Akt3);circRNA_3818|Chr2:240854068_240861760_-(Nfkb1);circRNA_3872|Chr20:3232306_3273815_+(RT1-T24-3);circRNA_6215|Chr7:130113212_13011…	rno05169
rno05200	Pathways in cancer	Human Diseases	Cancer: overview	39	327	258	2681	0.0822868	0.340999	1.23935	circRNA_0451|Chr1:200671013_200672411_-(Fgfr2);circRNA_1398|Chr11:68722906_68730129_-(Adcy5);circRNA_1399|Chr11:68745884_68750272_-(Adcy5);circRNA_1857|Chr13:95120752_95128782_-(Akt3);circRNA_1858|Chr13:95167819_95196402_-(Akt3);circRNA_1859|Chr13:95167819_95208329_-(Akt3);circRNA_1860|Chr13:95193009_95196402_-(Akt3);circRNA_1861|Chr13:95193009_95208329_-(Akt3);circRNA_2141|Chr14:87328008_8733187…	rno05200
rno05202	Transcriptional misregulation in cancers	Human Diseases	Cancer: overview	15	327	93	2681	0.154098	0.449752	1.32238	circRNA_1843|Chr13:86424477_86436725_-(Pbx1);circRNA_1845|Chr13:86432220_86451001_-(Pbx1);circRNA_1846|Chr13:86444740_86451001_-(Pbx1);circRNA_3818|Chr2:240854068_240861760_-(Nfkb1);circRNA_4977|Chr5:4408215_4469629_+(Eya1);circRNA_4979|Chr5:4424816_4449569_+(Eya1);circRNA_4980|Chr5:4424816_4469629_+(Eya1);circRNA_5747|Chr6:100396828_100397255_+(Fut8);circRNA_6155|Chr7:114555889_114562987_-(Ptk2)…	rno05202
rno05203	Viral carcinogenesis	Human Diseases	Cancer: overview	7	327	84	2681	0.903434	0.954512	0.683231	circRNA_0216|Chr1:116643750_116660509_+(Ube3a);circRNA_1039|Chr10:63908528_63915032_+(Ywhae);circRNA_3818|Chr2:240854068_240861760_-(Nfkb1);circRNA_3872|Chr20:3232306_3273815_+(RT1-T24-3);circRNA_5754|Chr6:103389817_103393554_-(Actn1);circRNA_6642|Chr8:117106575_117109692_+(Rhoa);circRNA_6643|Chr8:117109572_117114039_+(Rhoa);	rno05203
rno05205	Proteoglycans in cancer	Human Diseases	Cancer: overview	25	327	166	2681	0.149053	0.443373	1.23476	circRNA_0725|Chr1:262151915_262176067_-(Hpse2);circRNA_0726|Chr1:262786087_262811422_-(Hpse2);circRNA_1304|Chr11:29967593_29992834_-(Tiam1);circRNA_1857|Chr13:95120752_95128782_-(Akt3);circRNA_1858|Chr13:95167819_95196402_-(Akt3);circRNA_1859|Chr13:95167819_95208329_-(Akt3);circRNA_1860|Chr13:95193009_95196402_-(Akt3);circRNA_1861|Chr13:95193009_95208329_-(Akt3);circRNA_2158|Chr14:100058305_10006…	rno05205
rno05206	MicroRNAs in cancer	Human Diseases	Cancer: overview	11	327	82	2681	0.416723	0.746676	1.09984	circRNA_2158|Chr14:100058305_100066787_+(Egfr);circRNA_2837|Chr18:1337228_1354828_-(Rock1);circRNA_3701|Chr2:200243345_200253557_+(Notch2);circRNA_3818|Chr2:240854068_240861760_-(Nfkb1);circRNA_5043|Chr5:31700609_31739695_+(Mmp16);circRNA_5595|Chr6:28272106_28272697_+(Dnmt3a);circRNA_5724|Chr6:91938501_91961861_-(Sos2);circRNA_5808|Chr6:124651885_124677509_-(Rps6ka5);circRNA_6642|Chr8:117106575_1…	rno05206
rno05210	Colorectal cancer	Human Diseases	Cancer: specific types	16	327	61	2681	0.00190685	0.039885	2.1505	circRNA_1857|Chr13:95120752_95128782_-(Akt3);circRNA_1858|Chr13:95167819_95196402_-(Akt3);circRNA_1859|Chr13:95167819_95208329_-(Akt3);circRNA_1860|Chr13:95193009_95196402_-(Akt3);circRNA_1861|Chr13:95193009_95208329_-(Akt3);circRNA_2158|Chr14:100058305_100066787_+(Egfr);circRNA_2441|Chr16:2578902_2581762_-(Appl1);circRNA_3031|Chr18:69634006_69647714_-(Smad4);circRNA_3032|Chr18:69634006_69657373_…	rno05210
rno05211	Renal cell carcinoma	Human Diseases	Cancer: specific types	9	327	52	2681	0.175239	0.478097	1.41902	circRNA_1857|Chr13:95120752_95128782_-(Akt3);circRNA_1858|Chr13:95167819_95196402_-(Akt3);circRNA_1859|Chr13:95167819_95208329_-(Akt3);circRNA_1860|Chr13:95193009_95196402_-(Akt3);circRNA_1861|Chr13:95193009_95208329_-(Akt3);circRNA_3150|Chr19:30869716_30883569_+(Gab1);circRNA_4700|Chr4:67399951_67412670_-(Braf);circRNA_4702|Chr4:67449579_67450836_-(Braf);circRNA_5724|Chr6:91938501_91961861_-(Sos…	rno05211
rno05212	Pancreatic cancer	Human Diseases	Cancer: specific types	14	327	61	2681	0.0127228	0.151587	1.88169	circRNA_1857|Chr13:95120752_95128782_-(Akt3);circRNA_1858|Chr13:95167819_95196402_-(Akt3);circRNA_1859|Chr13:95167819_95208329_-(Akt3);circRNA_1860|Chr13:95193009_95196402_-(Akt3);circRNA_1861|Chr13:95193009_95208329_-(Akt3);circRNA_2158|Chr14:100058305_100066787_+(Egfr);circRNA_3031|Chr18:69634006_69647714_-(Smad4);circRNA_3032|Chr18:69634006_69657373_-(Smad4);circRNA_3034|Chr18:69642130_6965737…	rno05212
rno05213	Endometrial cancer	Human Diseases	Cancer: specific types	9	327	43	2681	0.0702054	0.30382	1.71602	circRNA_1857|Chr13:95120752_95128782_-(Akt3);circRNA_1858|Chr13:95167819_95196402_-(Akt3);circRNA_1859|Chr13:95167819_95208329_-(Akt3);circRNA_1860|Chr13:95193009_95196402_-(Akt3);circRNA_1861|Chr13:95193009_95208329_-(Akt3);circRNA_2158|Chr14:100058305_100066787_+(Egfr);circRNA_4700|Chr4:67399951_67412670_-(Braf);circRNA_4702|Chr4:67449579_67450836_-(Braf);circRNA_5724|Chr6:91938501_91961861_-(S…	rno05213
rno05214	Glioma	Human Diseases	Cancer: specific types	10	327	47	2681	0.0526561	0.259151	1.74442	circRNA_1857|Chr13:95120752_95128782_-(Akt3);circRNA_1858|Chr13:95167819_95196402_-(Akt3);circRNA_1859|Chr13:95167819_95208329_-(Akt3);circRNA_1860|Chr13:95193009_95196402_-(Akt3);circRNA_1861|Chr13:95193009_95208329_-(Akt3);circRNA_2158|Chr14:100058305_100066787_+(Egfr);circRNA_3796|Chr2:231078900_231128709_+(Camk2d);circRNA_4700|Chr4:67399951_67412670_-(Braf);circRNA_4702|Chr4:67449579_67450836…	rno05214
rno05215	Prostate cancer	Human Diseases	Cancer: specific types	11	327	62	2681	0.126376	0.408011	1.45462	circRNA_0451|Chr1:200671013_200672411_-(Fgfr2);circRNA_1857|Chr13:95120752_95128782_-(Akt3);circRNA_1858|Chr13:95167819_95196402_-(Akt3);circRNA_1859|Chr13:95167819_95208329_-(Akt3);circRNA_1860|Chr13:95193009_95196402_-(Akt3);circRNA_1861|Chr13:95193009_95208329_-(Akt3);circRNA_2158|Chr14:100058305_100066787_+(Egfr);circRNA_3818|Chr2:240854068_240861760_-(Nfkb1);circRNA_4700|Chr4:67399951_674126…	rno05215
rno05216	Thyroid cancer	Human Diseases	Cancer: specific types	2	327	20	2681	0.720889	0.905393	0.819878	circRNA_4700|Chr4:67399951_67412670_-(Braf);circRNA_4702|Chr4:67449579_67450836_-(Braf);	rno05216
rno05217	Basal cell carcinoma	Human Diseases	Cancer: specific types	1	327	9	2681	0.690419	0.902067	0.910975	circRNA_2720|Chr17:52477332_52555114_-(Gli3);	rno05217
rno05218	Melanoma	Human Diseases	Cancer: specific types	8	327	38	2681	0.0828723	0.340999	1.72606	circRNA_1857|Chr13:95120752_95128782_-(Akt3);circRNA_1858|Chr13:95167819_95196402_-(Akt3);circRNA_1859|Chr13:95167819_95208329_-(Akt3);circRNA_1860|Chr13:95193009_95196402_-(Akt3);circRNA_1861|Chr13:95193009_95208329_-(Akt3);circRNA_2158|Chr14:100058305_100066787_+(Egfr);circRNA_4700|Chr4:67399951_67412670_-(Braf);circRNA_4702|Chr4:67449579_67450836_-(Braf);	rno05218
rno05219	Bladder cancer	Human Diseases	Cancer: specific types	4	327	27	2681	0.422422	0.746676	1.21463	circRNA_2158|Chr14:100058305_100066787_+(Egfr);circRNA_4700|Chr4:67399951_67412670_-(Braf);circRNA_4702|Chr4:67449579_67450836_-(Braf);circRNA_5808|Chr6:124651885_124677509_-(Rps6ka5);	rno05219
rno05220	Chronic myeloid leukemia	Human Diseases	Cancer: specific types	12	327	51	2681	0.0168329	0.151587	1.92912	circRNA_1857|Chr13:95120752_95128782_-(Akt3);circRNA_1858|Chr13:95167819_95196402_-(Akt3);circRNA_1859|Chr13:95167819_95208329_-(Akt3);circRNA_1860|Chr13:95193009_95196402_-(Akt3);circRNA_1861|Chr13:95193009_95208329_-(Akt3);circRNA_3031|Chr18:69634006_69647714_-(Smad4);circRNA_3032|Chr18:69634006_69657373_-(Smad4);circRNA_3034|Chr18:69642130_69657373_-(Smad4);circRNA_3818|Chr2:240854068_24086176…	rno05220
rno05221	Acute myeloid leukemia	Human Diseases	Cancer: specific types	9	327	36	2681	0.025075	0.174828	2.04969	circRNA_1857|Chr13:95120752_95128782_-(Akt3);circRNA_1858|Chr13:95167819_95196402_-(Akt3);circRNA_1859|Chr13:95167819_95208329_-(Akt3);circRNA_1860|Chr13:95193009_95196402_-(Akt3);circRNA_1861|Chr13:95193009_95208329_-(Akt3);circRNA_3818|Chr2:240854068_240861760_-(Nfkb1);circRNA_4700|Chr4:67399951_67412670_-(Braf);circRNA_4702|Chr4:67449579_67450836_-(Braf);circRNA_5724|Chr6:91938501_91961861_-(S…	rno05221
rno05222	Small cell lung cancer	Human Diseases	Cancer: specific types	9	327	62	2681	0.341348	0.685426	1.19015	circRNA_1857|Chr13:95120752_95128782_-(Akt3);circRNA_1858|Chr13:95167819_95196402_-(Akt3);circRNA_1859|Chr13:95167819_95208329_-(Akt3);circRNA_1860|Chr13:95193009_95196402_-(Akt3);circRNA_1861|Chr13:95193009_95208329_-(Akt3);circRNA_3818|Chr2:240854068_240861760_-(Nfkb1);circRNA_4212|Chr3:71143189_71149475_+(Itgav);circRNA_6155|Chr7:114555889_114562987_-(Ptk2);circRNA_6271|Chr8:6014617_6023899_-(…	rno05222
rno05223	Non-small cell lung cancer	Human Diseases	Cancer: specific types	10	327	47	2681	0.0526561	0.259151	1.74442	circRNA_1857|Chr13:95120752_95128782_-(Akt3);circRNA_1858|Chr13:95167819_95196402_-(Akt3);circRNA_1859|Chr13:95167819_95208329_-(Akt3);circRNA_1860|Chr13:95193009_95196402_-(Akt3);circRNA_1861|Chr13:95193009_95208329_-(Akt3);circRNA_2158|Chr14:100058305_100066787_+(Egfr);circRNA_4700|Chr4:67399951_67412670_-(Braf);circRNA_4702|Chr4:67449579_67450836_-(Braf);circRNA_5508|Chr6:6627343_6668794_+(Eml…	rno05223
rno05224	Breast cancer	Human Diseases	Cancer: specific types	13	327	57	2681	0.0169513	0.151587	1.8699	circRNA_1857|Chr13:95120752_95128782_-(Akt3);circRNA_1858|Chr13:95167819_95196402_-(Akt3);circRNA_1859|Chr13:95167819_95208329_-(Akt3);circRNA_1860|Chr13:95193009_95196402_-(Akt3);circRNA_1861|Chr13:95193009_95208329_-(Akt3);circRNA_2158|Chr14:100058305_100066787_+(Egfr);circRNA_3701|Chr2:200243345_200253557_+(Notch2);circRNA_4377|Chr3:130093308_130099815_-(Jag1);circRNA_4700|Chr4:67399951_674126…	rno05224
rno05225	Hepatocellular carcinoma	Human Diseases	Cancer: specific types	15	327	102	2681	0.255715	0.575876	1.2057	circRNA_1857|Chr13:95120752_95128782_-(Akt3);circRNA_1858|Chr13:95167819_95196402_-(Akt3);circRNA_1859|Chr13:95167819_95208329_-(Akt3);circRNA_1860|Chr13:95193009_95196402_-(Akt3);circRNA_1861|Chr13:95193009_95208329_-(Akt3);circRNA_2158|Chr14:100058305_100066787_+(Egfr);circRNA_3031|Chr18:69634006_69647714_-(Smad4);circRNA_3032|Chr18:69634006_69657373_-(Smad4);circRNA_3034|Chr18:69642130_6965737…	rno05225
rno05226	Gastric cancer	Human Diseases	Cancer: specific types	16	327	76	2681	0.0182753	0.151587	1.72606	circRNA_0451|Chr1:200671013_200672411_-(Fgfr2);circRNA_1857|Chr13:95120752_95128782_-(Akt3);circRNA_1858|Chr13:95167819_95196402_-(Akt3);circRNA_1859|Chr13:95167819_95208329_-(Akt3);circRNA_1860|Chr13:95193009_95196402_-(Akt3);circRNA_1861|Chr13:95193009_95208329_-(Akt3);circRNA_2158|Chr14:100058305_100066787_+(Egfr);circRNA_3031|Chr18:69634006_69647714_-(Smad4);circRNA_3032|Chr18:69634006_696573…	rno05226
rno05230	Central carbon metabolism in cancer	Human Diseases	Cancer: overview	9	327	34	2681	0.0173936	0.151587	2.17026	circRNA_0259|Chr1:139943398_139956356_-(Ntrk3);circRNA_0451|Chr1:200671013_200672411_-(Fgfr2);circRNA_1857|Chr13:95120752_95128782_-(Akt3);circRNA_1858|Chr13:95167819_95196402_-(Akt3);circRNA_1859|Chr13:95167819_95208329_-(Akt3);circRNA_1860|Chr13:95193009_95196402_-(Akt3);circRNA_1861|Chr13:95193009_95208329_-(Akt3);circRNA_2158|Chr14:100058305_100066787_+(Egfr);circRNA_6847|Chr9:54232163_542488…	rno05230
rno05231	Choline metabolism in cancer	Human Diseases	Cancer: overview	14	327	61	2681	0.0127228	0.151587	1.88169	circRNA_1762|Chr13:67141798_67143114_-(Pla2g4a);circRNA_1857|Chr13:95120752_95128782_-(Akt3);circRNA_1858|Chr13:95167819_95196402_-(Akt3);circRNA_1859|Chr13:95167819_95208329_-(Akt3);circRNA_1860|Chr13:95193009_95196402_-(Akt3);circRNA_1861|Chr13:95193009_95208329_-(Akt3);circRNA_2158|Chr14:100058305_100066787_+(Egfr);circRNA_2364|Chr15:60816746_60821766_-(Dgkh);circRNA_3512|Chr2:113739689_113745…	rno05231
rno05320	Autoimmune thyroid disease	Human Diseases	Immune disease	1	327	11	2681	0.761568	0.905393	0.745343	circRNA_3872|Chr20:3232306_3273815_+(RT1-T24-3);	rno05320
rno05321	Inflammatiory bowel disease (IBD)	Human Diseases	Immune disease	1	327	14	2681	0.838906	0.927601	0.585627	circRNA_3818|Chr2:240854068_240861760_-(Nfkb1);	rno05321
rno05322	Systemic lupus erythematosus	Human Diseases	Immune disease	3	327	10	2681	0.112526	0.397185	2.45963	circRNA_0839|Chr10:5930383_5930975_+(Grin2a);circRNA_3443|Chr2:54755242_54759947_-(C7);circRNA_5754|Chr6:103389817_103393554_-(Actn1);	rno05322
rno05323	Rheumatoid arthritis	Human Diseases	Immune disease	1	327	17	2681	0.89121	0.954512	0.482281	circRNA_0878|Chr10:16769713_16774652_-(Atp6v0e1);	rno05323
rno05330	Allograft rejection	Human Diseases	Immune disease	1	327	11	2681	0.761568	0.905393	0.745343	circRNA_3872|Chr20:3232306_3273815_+(RT1-T24-3);	rno05330
rno05332	Graft-versus-host disease	Human Diseases	Immune disease	1	327	11	2681	0.761568	0.905393	0.745343	circRNA_3872|Chr20:3232306_3273815_+(RT1-T24-3);	rno05332
rno05410	Hypertrophic cardiomyopathy (HCM)	Human Diseases	Cardiovascular disease	7	327	60	2681	0.610833	0.856531	0.956524	circRNA_1740|Chr13:52671461_52673721_+(Tnnt2);circRNA_3428|Chr2:47182739_47203913_-(Itga1);circRNA_4212|Chr3:71143189_71149475_+(Itgav);circRNA_5502|Chr6:4259110_4315062_-(Slc8a1);circRNA_5503|Chr6:4278307_4315062_-(Slc8a1);circRNA_5504|Chr6:4298605_4315062_-(Slc8a1);circRNA_6680|Chr8:127289436_127301219_+(Itga9);	rno05410
rno05412	Arrhythmogenic right ventricular cardiomyopathy (ARVC)	Human Diseases	Cardiovascular disease	6	327	59	2681	0.743754	0.905393	0.833774	circRNA_3428|Chr2:47182739_47203913_-(Itga1);circRNA_4212|Chr3:71143189_71149475_+(Itgav);circRNA_5502|Chr6:4259110_4315062_-(Slc8a1);circRNA_5503|Chr6:4278307_4315062_-(Slc8a1);circRNA_5504|Chr6:4298605_4315062_-(Slc8a1);circRNA_6680|Chr8:127289436_127301219_+(Itga9);	rno05412
rno05414	Dilated cardiomyopathy (DCM)	Human Diseases	Cardiovascular disease	14	327	69	2681	0.0353793	0.222005	1.66352	circRNA_1398|Chr11:68722906_68730129_-(Adcy5);circRNA_1399|Chr11:68745884_68750272_-(Adcy5);circRNA_1740|Chr13:52671461_52673721_+(Tnnt2);circRNA_2141|Chr14:87328008_87331877_+(Adcy1);circRNA_2142|Chr14:87328008_87357732_+(Adcy1);circRNA_2143|Chr14:87328008_87377952_+(Adcy1);circRNA_2144|Chr14:87331763_87357732_+(Adcy1);circRNA_2145|Chr14:87350088_87357732_+(Adcy1);circRNA_3428|Chr2:47182739_4720…	rno05414
rno05416	Viral myocarditis	Human Diseases	Cardiovascular disease	1	327	22	2681	0.943508	0.965666	0.372672	circRNA_3872|Chr20:3232306_3273815_+(RT1-T24-3);	rno05416
rno05418	Fluid shear stress and atherosclerosis	Human Diseases	Cardiovascular disease	12	327	81	2681	0.278734	0.597969	1.21463	circRNA_1857|Chr13:95120752_95128782_-(Akt3);circRNA_1858|Chr13:95167819_95196402_-(Akt3);circRNA_1859|Chr13:95167819_95208329_-(Akt3);circRNA_1860|Chr13:95193009_95196402_-(Akt3);circRNA_1861|Chr13:95193009_95208329_-(Akt3);circRNA_3818|Chr2:240854068_240861760_-(Nfkb1);circRNA_4212|Chr3:71143189_71149475_+(Itgav);circRNA_6155|Chr7:114555889_114562987_-(Ptk2);circRNA_6215|Chr7:130113212_13011659…	rno05418

## Sheet: down-regulated(SSCI–2 vs. sham)
id	Term	Classification_level1	Classification_level2	ListHits	ListTotal	PopHits	PopTotal	p-value	q-value	Enrichment_score	Gene	hyperlink_only_excel
rno00020	Citrate cycle (TCA cycle)	Metabolism	Carbohydrate metabolism	1	340	16	2681	0.886541	0.946715	0.492831	circRNA_2355|Chr15:55485728_55488198_+(Sucla2);	rno00020
rno00030	Pentose phosphate pathway	Metabolism	Carbohydrate metabolism	1	340	6	2681	0.557132	0.799765	1.31422	circRNA_4933|Chr4:171770056_171775265_+(Dera);	rno00030
rno00062	Fatty acid elongation	Metabolism	Lipid metabolism	1	340	9	2681	0.705495	0.895595	0.876144	circRNA_5578|Chr6:27575763_27582987_-(Hadhb);	rno00062
rno00071	Fatty acid degradation	Metabolism	Lipid metabolism	2	340	13	2681	0.505019	0.767118	1.21312	circRNA_5578|Chr6:27575763_27582987_-(Hadhb);circRNA_6373|Chr8:58182482_58182849_-(Acat1);	rno00071
rno00130	Ubiquinone and other terpenoid-quinone biosynthesis	Metabolism	Metabolism of cofactors and vitamins	1	340	5	2681	0.492674	0.767118	1.57706	circRNA_1663|Chr12:47088804_47092139_-(Coq5);	rno00130
rno00190	Oxidative phosphorylation	Metabolism	Energy metabolism	2	340	21	2681	0.76639	0.910862	0.75098	circRNA_0878|Chr10:16769713_16774652_-(Atp6v0e1);circRNA_3812|Chr2:238543065_238577394_+(Ppa2);	rno00190
rno00220	Arginine biosynthesis	Metabolism	Amino acid metabolism	1	340	5	2681	0.492674	0.767118	1.57706	circRNA_6847|Chr9:54232163_54248877_+(Gls);	rno00220
rno00230	Purine metabolism	Metabolism	Nucleotide metabolism	17	340	57	2681	0.000434142	0.0104194	2.35175	circRNA_0277|Chr1:143107055_143109260_+(Pde8a);circRNA_0279|Chr1:143143055_143143524_+(Pde8a);circRNA_0380|Chr1:184008119_184017761_+(Pde3b);circRNA_0384|Chr1:184041764_184055555_+(Pde3b);circRNA_0603|Chr1:238998947_239014340_-(Gda);circRNA_1397|Chr11:68722906_68725314_-(Adcy5);circRNA_1398|Chr11:68722906_68730129_-(Adcy5);circRNA_1399|Chr11:68745884_68750272_-(Adcy5);circRNA_2141|Chr14:87328008_…	rno00230
rno00240	Pyrimidine metabolism	Metabolism	Nucleotide metabolism	1	340	19	2681	0.924674	0.969091	0.415015	circRNA_6793|Chr9:38582634_38584696_+(Prim2);	rno00240
rno00250	Alanine, aspartate and glutamate metabolism	Metabolism	Amino acid metabolism	1	340	13	2681	0.829188	0.918051	0.606561	circRNA_6847|Chr9:54232163_54248877_+(Gls);	rno00250
rno00270	Cysteine and methionine metabolism	Metabolism	Amino acid metabolism	1	340	8	2681	0.662575	0.859557	0.985662	circRNA_5595|Chr6:28272106_28272697_+(Dnmt3a);	rno00270
rno00280	Valine, leucine and isoleucine degradation	Metabolism	Amino acid metabolism	7	340	35	2681	0.145985	0.364963	1.57706	circRNA_2418|Chr15:109127707_109141568_+(Pcca);circRNA_4726|Chr4:82682367_82685493_-(Hibadh);circRNA_4727|Chr4:82682367_82692626_-(Hibadh);circRNA_5578|Chr6:27575763_27582987_-(Hadhb);circRNA_6373|Chr8:58182482_58182849_-(Acat1);circRNA_6567|Chr8:91509748_91527174_+(Bckdhb);circRNA_6838|Chr9:53459782_53462727_-(Hibch);	rno00280
rno00310	Lysine degradation	Metabolism	Amino acid metabolism	11	340	83	2681	0.487662	0.767118	1.04504	circRNA_2975|Chr18:48443339_48443646_+(Prdm6);circRNA_2977|Chr18:48443339_48508708_+(Prdm6);circRNA_2978|Chr18:48443339_48521166_+(Prdm6);circRNA_2979|Chr18:48443339_48531023_+(Prdm6);circRNA_3659|Chr2:188298849_188330330_+(Ash1l);circRNA_3663|Chr2:188308301_188309036_+(Ash1l);circRNA_3665|Chr2:188337238_188387007_+(Ash1l);circRNA_4513|Chr4:6164583_6169550_+(Kmt2c);circRNA_4626|Chr4:50180977_5020…	rno00310
rno00380	Tryptophan metabolism	Metabolism	Amino acid metabolism	1	340	7	2681	0.613422	0.831732	1.12647	circRNA_6373|Chr8:58182482_58182849_-(Acat1);	rno00380
rno00410	beta-Alanine metabolism	Metabolism	Metabolism of other amino acids	1	340	11	2681	0.775688	0.910862	0.716845	circRNA_6838|Chr9:53459782_53462727_-(Hibch);	rno00410
rno00480	Glutathione metabolism	Metabolism	Metabolism of other amino acids	1	340	15	2681	0.869956	0.936276	0.525686	circRNA_2559|Chr16:62222412_62226174_-(Gsr);	rno00480
rno00510	N-Glycan biosynthesis	Metabolism	Glycan biosynthesis and metabolism	2	340	21	2681	0.76639	0.910862	0.75098	circRNA_0269|Chr1:142160925_142161359_-(Man2a2);circRNA_5747|Chr6:100396828_100397255_+(Fut8);	rno00510
rno00520	Amino sugar and nucleotide sugar metabolism	Metabolism	Carbohydrate metabolism	3	340	22	2681	0.541708	0.799765	1.07527	circRNA_6732|Chr9:11194239_11209094_-(Uxs1);circRNA_6734|Chr9:11194239_11219449_-(Uxs1);circRNA_6736|Chr9:11202671_11219449_-(Uxs1);	rno00520
rno00531	Glycosaminoglycan degradation	Metabolism	Glycan biosynthesis and metabolism	3	340	5	2681	0.0166106	0.105545	4.73118	circRNA_0725|Chr1:262151915_262176067_-(Hpse2);circRNA_0726|Chr1:262786087_262811422_-(Hpse2);circRNA_6673|Chr8:122473237_122490342_+(Glb1);	rno00531
rno00561	Glycerolipid metabolism	Metabolism	Lipid metabolism	5	340	24	2681	0.179572	0.426706	1.64277	circRNA_2364|Chr15:60816746_60821766_-(Dgkh);circRNA_4663|Chr4:64431354_64474930_-(Dgki);circRNA_4664|Chr4:64451679_64474930_-(Dgki);circRNA_5626|Chr6:44055353_44097830_+(Mboat2);circRNA_5627|Chr6:44055353_44107579_+(Mboat2);	rno00561
rno00562	Inositol phosphate metabolism	Metabolism	Carbohydrate metabolism	9	340	77	2681	0.657337	0.857396	0.921658	circRNA_0389|Chr1:185252579_185264972_+(Pik3c2a);circRNA_0645|Chr1:251455609_251463748_+(Pten);circRNA_1468|Chr11:87898055_87899561_+(Pi4ka);circRNA_2072|Chr14:60573253_60586776_-(Pi4k2b);circRNA_2832|Chr18:307052_312848_-(Mtmr1);circRNA_3147|Chr19:29642344_29645344_-(Inpp4b);circRNA_3929|Chr20:18467660_18471939_-(Ipmk);circRNA_6804|Chr9:43968846_43977575_+(Inpp4a);circRNA_6920|Chr9:71920586_7196…	rno00562
rno00564	Glycerophospholipid metabolism	Metabolism	Lipid metabolism	7	340	42	2681	0.278349	0.566135	1.31422	circRNA_2364|Chr15:60816746_60821766_-(Dgkh);circRNA_3512|Chr2:113739689_113745181_+(Pld1);circRNA_3515|Chr2:113747182_113764892_+(Pld1);circRNA_4663|Chr4:64431354_64474930_-(Dgki);circRNA_4664|Chr4:64451679_64474930_-(Dgki);circRNA_5626|Chr6:44055353_44097830_+(Mboat2);circRNA_5627|Chr6:44055353_44107579_+(Mboat2);	rno00564
rno00565	Ether lipid metabolism	Metabolism	Lipid metabolism	4	340	28	2681	0.482789	0.767118	1.12647	circRNA_1011|Chr10:61464686_61498597_-(Pafah1b1);circRNA_3512|Chr2:113739689_113745181_+(Pld1);circRNA_3515|Chr2:113747182_113764892_+(Pld1);circRNA_5394|Chr5:152619586_152621233_+(Pafah2);	rno00565
rno00600	Sphingolipid metabolism	Metabolism	Lipid metabolism	6	340	26	2681	0.101501	0.303078	1.81968	circRNA_0311|Chr1:163203870_163216364_-(Acer3);circRNA_1464|Chr11:87529218_87529984_+(Smpd4);circRNA_1498|Chr12:4448685_4450137_-(Cers4);circRNA_2540|Chr16:54011840_54019134_+(Asah1);circRNA_5203|Chr5:105243242_105253190_+(Acer2);circRNA_6673|Chr8:122473237_122490342_+(Glb1);	rno00600
rno00604	Glycosphingolipid biosynthesis - ganglio series	Metabolism	Glycan biosynthesis and metabolism	1	340	9	2681	0.705495	0.895595	0.876144	circRNA_6673|Chr8:122473237_122490342_+(Glb1);	rno00604
rno00620	Pyruvate metabolism	Metabolism	Carbohydrate metabolism	1	340	12	2681	0.804252	0.918051	0.657108	circRNA_6373|Chr8:58182482_58182849_-(Acat1);	rno00620
rno00630	Glyoxylate and dicarboxylate metabolism	Metabolism	Carbohydrate metabolism	2	340	10	2681	0.368225	0.649809	1.57706	circRNA_2418|Chr15:109127707_109141568_+(Pcca);circRNA_6373|Chr8:58182482_58182849_-(Acat1);	rno00630
rno00640	Propanoate metabolism	Metabolism	Carbohydrate metabolism	5	340	25	2681	0.202743	0.463412	1.57706	circRNA_2355|Chr15:55485728_55488198_+(Sucla2);circRNA_2418|Chr15:109127707_109141568_+(Pcca);circRNA_6373|Chr8:58182482_58182849_-(Acat1);circRNA_6567|Chr8:91509748_91527174_+(Bckdhb);circRNA_6838|Chr9:53459782_53462727_-(Hibch);	rno00640
rno00760	Nicotinate and nicotinamide metabolism	Metabolism	Metabolism of cofactors and vitamins	1	340	6	2681	0.557132	0.799765	1.31422	circRNA_3460|Chr2:58477282_58489198_+(Nadk2);	rno00760
rno00770	Pantothenate and CoA biosynthesis	Metabolism	Metabolism of cofactors and vitamins	3	340	12	2681	0.187311	0.440732	1.97132	circRNA_4363|Chr3:123819852_123833222_+(Pank2);circRNA_4364|Chr3:123825681_123833222_+(Pank2);circRNA_4365|Chr3:123829471_123833222_+(Pank2);	rno00770
rno00830	Retinol metabolism	Metabolism	Metabolism of cofactors and vitamins	1	340	7	2681	0.613422	0.831732	1.12647	circRNA_5440|Chr5:162834556_162835977_+(Dhrs3);	rno00830
rno00900	Terpenoid backbone biosynthesis	Metabolism	Metabolism of terpenoids and polyketides	2	340	7	2681	0.219394	0.479603	2.25294	circRNA_2722|Chr17:53963185_53968528_+(Ggps1);circRNA_6373|Chr8:58182482_58182849_-(Acat1);	rno00900
rno00970	Aminoacyl-tRNA biosynthesis	Genetic Information Processing	Translation	4	340	16	2681	0.134815	0.347259	1.97132	circRNA_0300|Chr1:161928871_161932898_+(Nars2);circRNA_0301|Chr1:161988635_162006381_+(Nars2);circRNA_2941|Chr18:29633808_29634585_+(Hars2);circRNA_6957|Chr9:84367943_84370769_-(Farsb);	rno00970
rno00983	Drug metabolism - other enzymes	Metabolism	Xenobiotics biodegradation and metabolism	1	340	21	2681	0.94269	0.975197	0.37549	circRNA_3111|Chr19:15151107_15207439_+(Ces1d);	rno00983
rno01521	EGFR tyrosine kinase inhibitor resistance	Human Diseases	Drug resistance: antineoplastic	15	340	65	2681	0.0135322	0.0946233	1.81968	circRNA_0451|Chr1:200671013_200672411_-(Fgfr2);circRNA_0645|Chr1:251455609_251463748_+(Pten);circRNA_1059|Chr10:66891013_66900528_+(Nf1);circRNA_1061|Chr10:66901944_66917125_+(Nf1);circRNA_1236|Chr10:96264760_96266403_-(Prkca);circRNA_1857|Chr13:95120752_95128782_-(Akt3);circRNA_1858|Chr13:95167819_95196402_-(Akt3);circRNA_1859|Chr13:95167819_95208329_-(Akt3);circRNA_1861|Chr13:95193009_95208329_…	rno01521
rno01522	Endocrine resistance	Human Diseases	Drug resistance: antineoplastic	21	340	66	2681	3.15398e-05	0.00189239	2.50896	circRNA_1397|Chr11:68722906_68725314_-(Adcy5);circRNA_1398|Chr11:68722906_68730129_-(Adcy5);circRNA_1399|Chr11:68745884_68750272_-(Adcy5);circRNA_1857|Chr13:95120752_95128782_-(Akt3);circRNA_1858|Chr13:95167819_95196402_-(Akt3);circRNA_1859|Chr13:95167819_95208329_-(Akt3);circRNA_1861|Chr13:95193009_95208329_-(Akt3);circRNA_2141|Chr14:87328008_87331877_+(Adcy1);circRNA_2142|Chr14:87328008_8735773…	rno01522
rno01523	Antifolate resistance	Human Diseases	Drug resistance: antineoplastic	1	340	15	2681	0.869956	0.936276	0.525686	circRNA_3817|Chr2:240822115_240867796_-(Nfkb1);	rno01523
rno01524	Platinum drug resistance	Human Diseases	Drug resistance: antineoplastic	9	340	45	2681	0.107476	0.310775	1.57706	circRNA_1857|Chr13:95120752_95128782_-(Akt3);circRNA_1858|Chr13:95167819_95196402_-(Akt3);circRNA_1859|Chr13:95167819_95208329_-(Akt3);circRNA_1861|Chr13:95193009_95208329_-(Akt3);circRNA_2232|Chr15:10296336_10303515_-(Top2b);circRNA_3379|Chr2:31816052_31816763_-(Pik3r1);circRNA_3997|Chr20:44890495_44931228_+(Rev3l);circRNA_6271|Chr8:6014617_6023899_-(Birc2);circRNA_6748|Chr9:17166589_17167490_+(…	rno01524
rno02010	ABC transporters	Environmental Information Processing	Membrane transport	1	340	25	2681	0.966848	0.979087	0.315412	circRNA_4940|Chr4:176868013_176879489_-(Abcc9);	rno02010
rno03008	Ribosome biogenesis in eukaryotes	Genetic Information Processing	Translation	4	340	26	2681	0.42355	0.70278	1.21312	circRNA_0656|Chr1:254700270_254708288_+(Rpp30);circRNA_2681|Chr17:27440591_27442626_-(Riok1);circRNA_3538|Chr2:124187476_124205983_+(Spata5);circRNA_3600|Chr2:166406958_166423542_+(Nmd3);	rno03008
rno03013	RNA transport	Genetic Information Processing	Translation	9	340	58	2681	0.310703	0.60625	1.22358	circRNA_0305|Chr1:162684057_162691242_+(Clns1a);circRNA_0306|Chr1:162684057_162696070_+(Clns1a);circRNA_0656|Chr1:254700270_254708288_+(Rpp30);circRNA_3272|Chr19:56720223_56721427_-(Nup133);circRNA_3600|Chr2:166406958_166423542_+(Nmd3);circRNA_3969|Chr20:28067776_28072115_+(Ranbp2);circRNA_4063|Chr3:8906803_8907042_+(Nup188);circRNA_7211|ChrX:128202172_128205259_-(Thoc2);circRNA_7212|ChrX:1282021…	rno03013
rno03015	mRNA surveillance pathway	Genetic Information Processing	Translation	6	340	47	2681	0.559835	0.799765	1.00663	circRNA_0041|Chr1:16859047_16879498_+(Hbs1l);circRNA_0299|Chr1:157470071_157490006_-(Pcf11);circRNA_1017|Chr10:61882916_61885796_+(Smg6);circRNA_2925|Chr18:27704440_27708817_-(Etf1);circRNA_6028|Chr7:60390972_60408823_-(Cpsf6);circRNA_6031|Chr7:60407008_60408823_-(Cpsf6);	rno03015
rno03018	RNA degradation	Genetic Information Processing	Folding, sorting and degradation	5	340	53	2681	0.821379	0.918051	0.743896	circRNA_1515|Chr12:9233368_9240810_-(Pan3);circRNA_4661|Chr4:62617602_62619866_-(Cnot4);circRNA_6023|Chr7:59556898_59587384_-(Cnot2);circRNA_6025|Chr7:59566764_59587384_-(Cnot2);circRNA_6448|Chr8:69793755_69795155_-(Dis3l);	rno03018
rno03022	Basal transcription factors	Genetic Information Processing	Transcription	6	340	21	2681	0.0409942	0.172607	2.25294	circRNA_1593|Chr12:25431710_25435591_+(Gtf2i);circRNA_1594|Chr12:25442325_25447480_+(Gtf2i);circRNA_1596|Chr12:25442325_25454041_+(Gtf2i);circRNA_2866|Chr18:6218154_6233603_+(Taf4b);circRNA_2869|Chr18:6249297_6279570_+(Taf4b);circRNA_5734|Chr6:96070497_96108038_+(Mnat1);	rno03022
rno03030	DNA replication	Genetic Information Processing	Replication and repair	1	340	6	2681	0.557132	0.799765	1.31422	circRNA_6793|Chr9:38582634_38584696_+(Prim2);	rno03030
rno03040	Spliceosome	Genetic Information Processing	Transcription	7	340	30	2681	0.0760623	0.26611	1.8399	circRNA_0893|Chr10:29038498_29040713_+(Slu7);circRNA_1119|Chr10:75337353_75340473_+(Srsf1);circRNA_2638|Chr17:9503324_9503470_-(Ddx46);circRNA_4493|Chr3:177131326_177132323_+(Prpf6);circRNA_5943|Chr7:18533478_18535599_-(Hnrnpm);circRNA_7211|ChrX:128202172_128205259_-(Thoc2);circRNA_7212|ChrX:128202172_128211753_-(Thoc2);	rno03040
rno03050	Proteasome	Genetic Information Processing	Folding, sorting and degradation	2	340	10	2681	0.368225	0.649809	1.57706	circRNA_2205|Chr14:115183821_115195697_+(Psme4);circRNA_4483|Chr3:175422379_175423144_-(Psma7);	rno03050
rno03320	PPAR signaling pathway	Organismal Systems	Endocrine system	5	340	54	2681	0.833896	0.918051	0.73012	circRNA_0696|Chr1:259412482_259459540_-(Sorbs1);circRNA_0697|Chr1:259421033_259437470_-(Sorbs1);circRNA_0703|Chr1:259434763_259479455_-(Sorbs1);circRNA_0715|Chr1:259479327_259488326_-(Sorbs1);circRNA_4845|Chr4:147295666_147361944_+(Pparg);	rno03320
rno03420	Nucleotide excision repair	Genetic Information Processing	Replication and repair	1	340	10	2681	0.74297	0.910862	0.788529	circRNA_5734|Chr6:96070497_96108038_+(Mnat1);	rno03420
rno03440	Homologous recombination	Genetic Information Processing	Replication and repair	1	340	21	2681	0.94269	0.975197	0.37549	circRNA_2851|Chr18:3175483_3176344_+(Rbbp8);	rno03440
rno03460	Fanconi anemia pathway	Genetic Information Processing	Replication and repair	3	340	14	2681	0.257883	0.542911	1.68971	circRNA_2191|Chr14:110683107_110709166_+(Fancl);circRNA_3997|Chr20:44890495_44931228_+(Rev3l);circRNA_6748|Chr9:17166589_17167490_+(Polh);	rno03460
rno04010	MAPK signaling pathway	Environmental Information Processing	Signal transduction	28	340	213	2681	0.449517	0.735291	1.03656	circRNA_0451|Chr1:200671013_200672411_-(Fgfr2);circRNA_1059|Chr10:66891013_66900528_+(Nf1);circRNA_1061|Chr10:66901944_66917125_+(Nf1);circRNA_1212|Chr10:94292693_94314584_+(Map3k3);circRNA_1236|Chr10:96264760_96266403_-(Prkca);circRNA_1857|Chr13:95120752_95128782_-(Akt3);circRNA_1858|Chr13:95167819_95196402_-(Akt3);circRNA_1859|Chr13:95167819_95208329_-(Akt3);circRNA_1861|Chr13:95193009_95208329…	rno04010
rno04012	ErbB signaling pathway	Environmental Information Processing	Signal transduction	15	340	71	2681	0.0293281	0.143648	1.66591	circRNA_1236|Chr10:96264760_96266403_-(Prkca);circRNA_1368|Chr11:51049296_51068978_-(Cblb);circRNA_1369|Chr11:51057506_51068978_-(Cblb);circRNA_1857|Chr13:95120752_95128782_-(Akt3);circRNA_1858|Chr13:95167819_95196402_-(Akt3);circRNA_1859|Chr13:95167819_95208329_-(Akt3);circRNA_1861|Chr13:95193009_95208329_-(Akt3);circRNA_2158|Chr14:100058305_100066787_+(Egfr);circRNA_3149|Chr19:30869716_30870010…	rno04012
rno04014	Ras signaling pathway	Environmental Information Processing	Signal transduction	23	340	131	2681	0.0609219	0.224942	1.38444	circRNA_0451|Chr1:200671013_200672411_-(Fgfr2);circRNA_0839|Chr10:5930383_5930975_+(Grin2a);circRNA_1059|Chr10:66891013_66900528_+(Nf1);circRNA_1061|Chr10:66901944_66917125_+(Nf1);circRNA_1236|Chr10:96264760_96266403_-(Prkca);circRNA_1659|Chr12:44761634_44762147_-(Ksr2);circRNA_1780|Chr13:69936554_69944404_-(Rgl1);circRNA_1857|Chr13:95120752_95128782_-(Akt3);circRNA_1858|Chr13:95167819_95196402_-…	rno04014
rno04015	Rap1 signaling pathway	Environmental Information Processing	Signal transduction	27	340	139	2681	0.0132364	0.0946233	1.53168	circRNA_0451|Chr1:200671013_200672411_-(Fgfr2);circRNA_0839|Chr10:5930383_5930975_+(Grin2a);circRNA_1236|Chr10:96264760_96266403_-(Prkca);circRNA_1397|Chr11:68722906_68725314_-(Adcy5);circRNA_1398|Chr11:68722906_68730129_-(Adcy5);circRNA_1399|Chr11:68745884_68750272_-(Adcy5);circRNA_1857|Chr13:95120752_95128782_-(Akt3);circRNA_1858|Chr13:95167819_95196402_-(Akt3);circRNA_1859|Chr13:95167819_95208…	rno04015
rno04020	Calcium signaling pathway	Environmental Information Processing	Signal transduction	23	340	116	2681	0.0169858	0.105545	1.56346	circRNA_0839|Chr10:5930383_5930975_+(Grin2a);circRNA_1236|Chr10:96264760_96266403_-(Prkca);circRNA_1405|Chr11:69064518_69068514_-(Mylk);circRNA_1725|Chr13:50150091_50150276_-(Atp2b4);circRNA_2141|Chr14:87328008_87331877_+(Adcy1);circRNA_2142|Chr14:87328008_87357732_+(Adcy1);circRNA_2143|Chr14:87328008_87377952_+(Adcy1);circRNA_2144|Chr14:87331763_87357732_+(Adcy1);circRNA_2145|Chr14:87350088_8735…	rno04020
rno04022	cGMP - PKG signaling pathway	Environmental Information Processing	Signal transduction	33	340	156	2681	0.00151945	0.0260478	1.66804	circRNA_0380|Chr1:184008119_184017761_+(Pde3b);circRNA_0384|Chr1:184041764_184055555_+(Pde3b);circRNA_1397|Chr11:68722906_68725314_-(Adcy5);circRNA_1398|Chr11:68722906_68730129_-(Adcy5);circRNA_1399|Chr11:68745884_68750272_-(Adcy5);circRNA_1405|Chr11:69064518_69068514_-(Mylk);circRNA_1593|Chr12:25431710_25435591_+(Gtf2i);circRNA_1594|Chr12:25442325_25447480_+(Gtf2i);circRNA_1596|Chr12:25442325_25…	rno04022
rno04024	cAMP signaling pathway	Environmental Information Processing	Signal transduction	28	340	130	2681	0.00261296	0.0368888	1.69837	circRNA_0380|Chr1:184008119_184017761_+(Pde3b);circRNA_0384|Chr1:184041764_184055555_+(Pde3b);circRNA_0839|Chr10:5930383_5930975_+(Grin2a);circRNA_1397|Chr11:68722906_68725314_-(Adcy5);circRNA_1398|Chr11:68722906_68730129_-(Adcy5);circRNA_1399|Chr11:68745884_68750272_-(Adcy5);circRNA_1725|Chr13:50150091_50150276_-(Atp2b4);circRNA_1857|Chr13:95120752_95128782_-(Akt3);circRNA_1858|Chr13:95167819_95…	rno04024
rno04060	Cytokine-cytokine receptor interaction	Environmental Information Processing	Signaling molecules and interaction	4	340	32	2681	0.592861	0.823933	0.985662	circRNA_2158|Chr14:100058305_100066787_+(Egfr);circRNA_3450|Chr2:56451097_56456188_+(Lifr);circRNA_4137|Chr3:44500847_44522988_-(Acvr1);circRNA_5249|Chr5:120609027_120616745_+(Lepr);	rno04060
rno04062	Chemokine signaling pathway	Organismal Systems	Immune system	24	340	98	2681	0.000818883	0.0163777	1.93109	circRNA_1397|Chr11:68722906_68725314_-(Adcy5);circRNA_1398|Chr11:68722906_68730129_-(Adcy5);circRNA_1399|Chr11:68745884_68750272_-(Adcy5);circRNA_1857|Chr13:95120752_95128782_-(Akt3);circRNA_1858|Chr13:95167819_95196402_-(Akt3);circRNA_1859|Chr13:95167819_95208329_-(Akt3);circRNA_1861|Chr13:95193009_95208329_-(Akt3);circRNA_2096|Chr14:81267948_81280976_-(Grk4);circRNA_2097|Chr14:81278563_81280976…	rno04062
rno04064	NF-kappa B signaling pathway	Environmental Information Processing	Signal transduction	5	340	30	2681	0.329682	0.613362	1.31422	circRNA_3817|Chr2:240822115_240867796_-(Nfkb1);circRNA_4871|Chr4:152265847_152274059_-(Erc1);circRNA_4873|Chr4:152282030_152355930_-(Erc1);circRNA_6271|Chr8:6014617_6023899_-(Birc2);circRNA_7137|ChrX:54037977_54102885_+(Tab3);	rno04064
rno04066	HIF-1 signaling pathway	Environmental Information Processing	Signal transduction	8	340	51	2681	0.315857	0.608034	1.23691	circRNA_1236|Chr10:96264760_96266403_-(Prkca);circRNA_1857|Chr13:95120752_95128782_-(Akt3);circRNA_1858|Chr13:95167819_95196402_-(Akt3);circRNA_1859|Chr13:95167819_95208329_-(Akt3);circRNA_1861|Chr13:95193009_95208329_-(Akt3);circRNA_2158|Chr14:100058305_100066787_+(Egfr);circRNA_3379|Chr2:31816052_31816763_-(Pik3r1);circRNA_3817|Chr2:240822115_240867796_-(Nfkb1);	rno04066
rno04068	FoxO signaling pathway	Environmental Information Processing	Signal transduction	14	340	87	2681	0.205571	0.464656	1.2689	circRNA_0645|Chr1:251455609_251463748_+(Pten);circRNA_1857|Chr13:95120752_95128782_-(Akt3);circRNA_1858|Chr13:95167819_95196402_-(Akt3);circRNA_1859|Chr13:95167819_95208329_-(Akt3);circRNA_1861|Chr13:95193009_95208329_-(Akt3);circRNA_2158|Chr14:100058305_100066787_+(Egfr);circRNA_2585|Chr16:80780733_80793376_-(Fbxo25);circRNA_3031|Chr18:69634006_69647714_-(Smad4);circRNA_3037|Chr18:69654505_69657…	rno04068
rno04070	Phosphatidylinositol signaling system	Environmental Information Processing	Signal transduction	14	340	102	2681	0.418743	0.70278	1.0823	circRNA_0389|Chr1:185252579_185264972_+(Pik3c2a);circRNA_0645|Chr1:251455609_251463748_+(Pten);circRNA_1236|Chr10:96264760_96266403_-(Prkca);circRNA_1468|Chr11:87898055_87899561_+(Pi4ka);circRNA_2072|Chr14:60573253_60586776_-(Pi4k2b);circRNA_2364|Chr15:60816746_60821766_-(Dgkh);circRNA_2832|Chr18:307052_312848_-(Mtmr1);circRNA_3147|Chr19:29642344_29645344_-(Inpp4b);circRNA_3379|Chr2:31816052_3181…	rno04070
rno04071	Sphingolipid signaling pathway	Environmental Information Processing	Signal transduction	16	340	88	2681	0.0831907	0.281223	1.43369	circRNA_0645|Chr1:251455609_251463748_+(Pten);circRNA_1236|Chr10:96264760_96266403_-(Prkca);circRNA_1498|Chr12:4448685_4450137_-(Cers4);circRNA_1857|Chr13:95120752_95128782_-(Akt3);circRNA_1858|Chr13:95167819_95196402_-(Akt3);circRNA_1859|Chr13:95167819_95208329_-(Akt3);circRNA_1861|Chr13:95193009_95208329_-(Akt3);circRNA_2540|Chr16:54011840_54019134_+(Asah1);circRNA_3379|Chr2:31816052_31816763_-…	rno04071
rno04072	Phospholipase D signaling pathway	Environmental Information Processing	Signal transduction	28	340	89	2681	1.86646e-06	0.000447951	2.48077	circRNA_1236|Chr10:96264760_96266403_-(Prkca);circRNA_1397|Chr11:68722906_68725314_-(Adcy5);circRNA_1398|Chr11:68722906_68730129_-(Adcy5);circRNA_1399|Chr11:68745884_68750272_-(Adcy5);circRNA_1857|Chr13:95120752_95128782_-(Akt3);circRNA_1858|Chr13:95167819_95196402_-(Akt3);circRNA_1859|Chr13:95167819_95208329_-(Akt3);circRNA_1861|Chr13:95193009_95208329_-(Akt3);circRNA_2141|Chr14:87328008_8733187…	rno04072
rno04080	Neuroactive ligand-receptor interaction	Environmental Information Processing	Signaling molecules and interaction	4	340	14	2681	0.0905797	0.286041	2.25294	circRNA_0839|Chr10:5930383_5930975_+(Grin2a);circRNA_3280|Chr19:60370736_60429996_+(Pard3);circRNA_3978|Chr20:31900597_31901729_+(Tacr2);circRNA_5249|Chr5:120609027_120616745_+(Lepr);	rno04080
rno04110	Cell cycle	Cellular Processes	Cell growth and death	8	340	72	2681	0.710994	0.895595	0.876144	circRNA_1643|Chr12:39627016_39635912_-(Anapc7);circRNA_2352|Chr15:55151603_55154467_-(Rb1);circRNA_3031|Chr18:69634006_69647714_-(Smad4);circRNA_3037|Chr18:69654505_69657373_-(Smad4);circRNA_3059|Chr18:72593000_72611211_+(Smad2);circRNA_6611|Chr8:109243253_109288160_+(Stag1);circRNA_6612|Chr8:109250465_109254764_+(Stag1);circRNA_6862|Chr9:65361368_65364133_-(Orc2);	rno04110
rno04114	Oocyte meiosis	Cellular Processes	Cell growth and death	13	340	70	2681	0.0977063	0.300635	1.46441	circRNA_0661|Chr1:255685048_255694514_-(Cpeb3);circRNA_0663|Chr1:255727112_255764689_-(Cpeb3);circRNA_1397|Chr11:68722906_68725314_-(Adcy5);circRNA_1398|Chr11:68722906_68730129_-(Adcy5);circRNA_1399|Chr11:68745884_68750272_-(Adcy5);circRNA_1643|Chr12:39627016_39635912_-(Anapc7);circRNA_2141|Chr14:87328008_87331877_+(Adcy1);circRNA_2142|Chr14:87328008_87357732_+(Adcy1);circRNA_2143|Chr14:87328008_…	rno04114
rno04115	p53 signaling pathway	Cellular Processes	Cell growth and death	1	340	19	2681	0.924674	0.969091	0.415015	circRNA_0645|Chr1:251455609_251463748_+(Pten);	rno04115
rno04120	Ubiquitin mediated proteolysis	Genetic Information Processing	Folding, sorting and degradation	15	340	120	2681	0.567669	0.806156	0.985662	circRNA_0216|Chr1:116643750_116660509_+(Ube3a);circRNA_0999|Chr10:59192184_59239990_+(Ube2g1);circRNA_1368|Chr11:51049296_51068978_-(Cblb);circRNA_1369|Chr11:51057506_51068978_-(Cblb);circRNA_1643|Chr12:39627016_39635912_-(Anapc7);circRNA_2191|Chr14:110683107_110709166_+(Fancl);circRNA_3007|Chr18:60691028_60702777_+(Nedd4l);circRNA_4426|Chr3:150692740_150696569_+(Itch);circRNA_4430|Chr3:150717267…	rno04120
rno04130	SNARE interactions in vesicular transport	Genetic Information Processing	Folding, sorting and degradation	1	340	6	2681	0.557132	0.799765	1.31422	circRNA_1032|Chr10:63412175_63412639_+(Gosr1);	rno04130
rno04140	Autophagy - animal	Cellular Processes	Transport and catabolism	11	340	77	2681	0.384621	0.668906	1.12647	circRNA_0316|Chr1:163965001_164064815_-(Uvrag);circRNA_0317|Chr1:164025518_164055455_-(Uvrag);circRNA_0318|Chr1:164025518_164064815_-(Uvrag);circRNA_0645|Chr1:251455609_251463748_+(Pten);circRNA_1857|Chr13:95120752_95128782_-(Akt3);circRNA_1858|Chr13:95167819_95196402_-(Akt3);circRNA_1859|Chr13:95167819_95208329_-(Akt3);circRNA_1861|Chr13:95193009_95208329_-(Akt3);circRNA_3379|Chr2:31816052_31816…	rno04140
rno04141	Protein processing in endoplasmic reticulum	Genetic Information Processing	Folding, sorting and degradation	5	340	86	2681	0.989335	0.993475	0.458447	circRNA_0914|Chr10:37167400_37172772_-(Sec24a);circRNA_0999|Chr10:59192184_59239990_+(Ube2g1);circRNA_2811|Chr17:85036937_85057912_-(Dnajc1);circRNA_2812|Chr17:85036937_85064621_-(Dnajc1);circRNA_3249|Chr19:52169070_52171485_-(Mbtps1);	rno04141
rno04142	Lysosome	Cellular Processes	Transport and catabolism	3	340	50	2681	0.962539	0.978853	0.473118	circRNA_2540|Chr16:54011840_54019134_+(Asah1);circRNA_5959|Chr7:28987514_28990116_+(Gnptab);circRNA_6673|Chr8:122473237_122490342_+(Glb1);	rno04142
rno04144	Endocytosis	Cellular Processes	Transport and catabolism	30	340	193	2681	0.1307	0.340958	1.22569	circRNA_0451|Chr1:200671013_200672411_-(Fgfr2);circRNA_0503|Chr1:214562895_214581660_+(Ap2a2);circRNA_0865|Chr10:15358869_15376292_-(Rab11fip3);circRNA_0989|Chr10:57549452_57549919_+(Rabep1);circRNA_0990|Chr10:57549452_57563686_+(Rabep1);circRNA_1284|Chr11:2672491_2678232_-(Chmp2b);circRNA_1368|Chr11:51049296_51068978_-(Cblb);circRNA_1369|Chr11:51057506_51068978_-(Cblb);circRNA_1411|Chr11:7072456…	rno04144
rno04145	Phagosome	Cellular Processes	Transport and catabolism	4	340	61	2681	0.961053	0.978853	0.517068	circRNA_0878|Chr10:16769713_16774652_-(Atp6v0e1);circRNA_3872|Chr20:3232306_3273815_+(RT1-T24-3);circRNA_4147|Chr3:46525736_46528994_-(Pla2r1);circRNA_6920|Chr9:71920586_71960153_+(Pikfyve);	rno04145
rno04150	mTOR signaling pathway	Environmental Information Processing	Signal transduction	15	340	89	2681	0.149104	0.368918	1.32898	circRNA_0645|Chr1:251455609_251463748_+(Pten);circRNA_1236|Chr10:96264760_96266403_-(Prkca);circRNA_1857|Chr13:95120752_95128782_-(Akt3);circRNA_1858|Chr13:95167819_95196402_-(Akt3);circRNA_1859|Chr13:95167819_95208329_-(Akt3);circRNA_1861|Chr13:95193009_95208329_-(Akt3);circRNA_3379|Chr2:31816052_31816763_-(Pik3r1);circRNA_4518|Chr4:6866069_6869642_+(Rheb);circRNA_4917|Chr4:168213382_168221653_-…	rno04150
rno04151	PI3K-Akt signaling pathway	Environmental Information Processing	Signal transduction	17	340	161	2681	0.830344	0.918051	0.832609	circRNA_0451|Chr1:200671013_200672411_-(Fgfr2);circRNA_0645|Chr1:251455609_251463748_+(Pten);circRNA_1155|Chr10:82756914_82757163_+(Col1a1);circRNA_1236|Chr10:96264760_96266403_-(Prkca);circRNA_1857|Chr13:95120752_95128782_-(Akt3);circRNA_1858|Chr13:95167819_95196402_-(Akt3);circRNA_1859|Chr13:95167819_95208329_-(Akt3);circRNA_1861|Chr13:95193009_95208329_-(Akt3);circRNA_2158|Chr14:100058305_1000…	rno04151
rno04152	AMPK signaling pathway	Environmental Information Processing	Signal transduction	9	340	63	2681	0.405428	0.69009	1.12647	circRNA_1857|Chr13:95120752_95128782_-(Akt3);circRNA_1858|Chr13:95167819_95196402_-(Akt3);circRNA_1859|Chr13:95167819_95208329_-(Akt3);circRNA_1861|Chr13:95193009_95208329_-(Akt3);circRNA_2062|Chr14:45683767_45691895_-(Tbc1d1);circRNA_3379|Chr2:31816052_31816763_-(Pik3r1);circRNA_4518|Chr4:6866069_6869642_+(Rheb);circRNA_4845|Chr4:147295666_147361944_+(Pparg);circRNA_5249|Chr5:120609027_120616745…	rno04152
rno04210	Apoptosis	Cellular Processes	Cell growth and death	8	340	62	2681	0.537385	0.799765	1.01746	circRNA_1857|Chr13:95120752_95128782_-(Akt3);circRNA_1858|Chr13:95167819_95196402_-(Akt3);circRNA_1859|Chr13:95167819_95208329_-(Akt3);circRNA_1861|Chr13:95193009_95208329_-(Akt3);circRNA_3379|Chr2:31816052_31816763_-(Pik3r1);circRNA_3817|Chr2:240822115_240867796_-(Nfkb1);circRNA_4090|Chr3:15042229_15042609_+(Dab2ip);circRNA_6271|Chr8:6014617_6023899_-(Birc2);	rno04210
rno04211	Longevity regulating pathway - mammal	Organismal Systems	Aging	17	340	64	2681	0.00184459	0.0295135	2.09453	circRNA_1397|Chr11:68722906_68725314_-(Adcy5);circRNA_1398|Chr11:68722906_68730129_-(Adcy5);circRNA_1399|Chr11:68745884_68750272_-(Adcy5);circRNA_1857|Chr13:95120752_95128782_-(Akt3);circRNA_1858|Chr13:95167819_95196402_-(Akt3);circRNA_1859|Chr13:95167819_95208329_-(Akt3);circRNA_1861|Chr13:95193009_95208329_-(Akt3);circRNA_2141|Chr14:87328008_87331877_+(Adcy1);circRNA_2142|Chr14:87328008_8735773…	rno04211
rno04213	Longevity regulating pathway - multiple species	Organismal Systems	Aging	13	340	31	2681	4.22893e-05	0.00202989	3.30674	circRNA_1397|Chr11:68722906_68725314_-(Adcy5);circRNA_1398|Chr11:68722906_68730129_-(Adcy5);circRNA_1399|Chr11:68745884_68750272_-(Adcy5);circRNA_1857|Chr13:95120752_95128782_-(Akt3);circRNA_1858|Chr13:95167819_95196402_-(Akt3);circRNA_1859|Chr13:95167819_95208329_-(Akt3);circRNA_1861|Chr13:95193009_95208329_-(Akt3);circRNA_2141|Chr14:87328008_87331877_+(Adcy1);circRNA_2142|Chr14:87328008_8735773…	rno04213
rno04215	Apoptosis - multiple species	Cellular Processes	Cell growth and death	2	340	9	2681	0.319218	0.608034	1.75229	circRNA_5545|Chr6:21942755_21944809_-(Birc6);circRNA_6271|Chr8:6014617_6023899_-(Birc2);	rno04215
rno04216	Ferroptosis	Cellular Processes	Cell growth and death	1	340	10	2681	0.74297	0.910862	0.788529	circRNA_6262|Chr7:144080542_144084759_+(Pcbp2);	rno04216
rno04217	Necroptosis	Cellular Processes	Cell growth and death	4	340	44	2681	0.828228	0.918051	0.716845	circRNA_1284|Chr11:2672491_2678232_-(Chmp2b);circRNA_2271|Chr15:34277381_34277914_+(Rnf31);circRNA_5292|Chr5:129448885_129457884_+(Faf1);circRNA_6271|Chr8:6014617_6023899_-(Birc2);	rno04217
rno04218	Cellular senescence	Cellular Processes	Cell growth and death	16	340	111	2681	0.329291	0.613362	1.13662	circRNA_0645|Chr1:251455609_251463748_+(Pten);circRNA_1644|Chr12:39719713_39721351_+(Rad9b);circRNA_1857|Chr13:95120752_95128782_-(Akt3);circRNA_1858|Chr13:95167819_95196402_-(Akt3);circRNA_1859|Chr13:95167819_95208329_-(Akt3);circRNA_1861|Chr13:95193009_95208329_-(Akt3);circRNA_2337|Chr15:51925689_51954838_-(Ppp3cc);circRNA_2352|Chr15:55151603_55154467_-(Rb1);circRNA_3059|Chr18:72593000_72611211…	rno04218
rno04260	Cardiac muscle contraction	Organismal Systems	Circulatory system	8	340	39	2681	0.111628	0.318936	1.6175	circRNA_1740|Chr13:52671461_52673721_+(Tnnt2);circRNA_4864|Chr4:151118221_151124504_-(Cacna1c);circRNA_5502|Chr6:4259110_4315062_-(Slc8a1);circRNA_5503|Chr6:4278307_4315062_-(Slc8a1);circRNA_5504|Chr6:4298605_4315062_-(Slc8a1);circRNA_6491|Chr8:72823430_72828397_-(Tpm1);circRNA_6597|Chr8:104192886_104202285_-(Atp1b3);circRNA_7250|ChrX:159023994_159035906_+(Slc9a6);	rno04260
rno04261	Adrenergic signaling in cardiomyocytes	Organismal Systems	Circulatory system	25	340	102	2681	0.000630069	0.013747	1.93267	circRNA_1236|Chr10:96264760_96266403_-(Prkca);circRNA_1397|Chr11:68722906_68725314_-(Adcy5);circRNA_1398|Chr11:68722906_68730129_-(Adcy5);circRNA_1399|Chr11:68745884_68750272_-(Adcy5);circRNA_1725|Chr13:50150091_50150276_-(Atp2b4);circRNA_1740|Chr13:52671461_52673721_+(Tnnt2);circRNA_1857|Chr13:95120752_95128782_-(Akt3);circRNA_1858|Chr13:95167819_95196402_-(Akt3);circRNA_1859|Chr13:95167819_9520…	rno04261
rno04270	Vascular smooth muscle contraction	Organismal Systems	Circulatory system	22	340	132	2681	0.103552	0.303078	1.31422	circRNA_0650|Chr1:252537894_252539495_+(Acta2);circRNA_0793|Chr10:776697_822670_+(Myh11);circRNA_0797|Chr10:800444_802135_+(Myh11);circRNA_0799|Chr10:805713_819703_+(Myh11);circRNA_1236|Chr10:96264760_96266403_-(Prkca);circRNA_1397|Chr11:68722906_68725314_-(Adcy5);circRNA_1398|Chr11:68722906_68730129_-(Adcy5);circRNA_1399|Chr11:68745884_68750272_-(Adcy5);circRNA_1405|Chr11:69064518_69068514_-(Myl…	rno04270
rno04310	Wnt signaling pathway	Environmental Information Processing	Signal transduction	9	340	88	2681	0.804404	0.918051	0.806451	circRNA_1236|Chr10:96264760_96266403_-(Prkca);circRNA_2337|Chr15:51925689_51954838_-(Ppp3cc);circRNA_3031|Chr18:69634006_69647714_-(Smad4);circRNA_3037|Chr18:69654505_69657373_-(Smad4);circRNA_3204|Chr19:38057557_38091369_+(Nfatc3);circRNA_4917|Chr4:168213382_168221653_-(Lrp6);circRNA_4921|Chr4:168260038_168267184_-(Lrp6);circRNA_6642|Chr8:117106575_117109692_+(Rhoa);circRNA_6643|Chr8:117109572_1…	rno04310
rno04330	Notch signaling pathway	Environmental Information Processing	Signal transduction	2	340	19	2681	0.715201	0.895595	0.830031	circRNA_3569|Chr2:141024600_141026192_-(Maml3);circRNA_3701|Chr2:200243345_200253557_+(Notch2);	rno04330
rno04340	Hedgehog signaling pathway	Environmental Information Processing	Signal transduction	2	340	25	2681	0.845228	0.926278	0.630824	circRNA_2605|Chr17:1057871_1065593_-(Ptch1);circRNA_2720|Chr17:52477332_52555114_-(Gli3);	rno04340
rno04350	TGF-beta signaling pathway	Environmental Information Processing	Signal transduction	6	340	62	2681	0.817492	0.918051	0.763093	circRNA_3031|Chr18:69634006_69647714_-(Smad4);circRNA_3037|Chr18:69654505_69657373_-(Smad4);circRNA_3059|Chr18:72593000_72611211_+(Smad2);circRNA_4137|Chr3:44500847_44522988_-(Acvr1);circRNA_6642|Chr8:117106575_117109692_+(Rhoa);circRNA_6643|Chr8:117109572_117114039_+(Rhoa);	rno04350
rno04360	Axon guidance	Organismal Systems	Development and regeneration	14	340	115	2681	0.610363	0.831732	0.959949	circRNA_1236|Chr10:96264760_96266403_-(Prkca);circRNA_1875|Chr13:100300002_100353039_-(Enah);circRNA_2337|Chr15:51925689_51954838_-(Ppp3cc);circRNA_2605|Chr17:1057871_1065593_-(Ptch1);circRNA_3204|Chr19:38057557_38091369_+(Nfatc3);circRNA_3280|Chr19:60370736_60429996_+(Pard3);circRNA_3379|Chr2:31816052_31816763_-(Pik3r1);circRNA_3751|Chr2:212852209_212852849_-(Ntng1);circRNA_4560|Chr4:18311528_18…	rno04360
rno04370	VEGF signaling pathway	Environmental Information Processing	Signal transduction	11	340	60	2681	0.130038	0.340958	1.44564	circRNA_1236|Chr10:96264760_96266403_-(Prkca);circRNA_1857|Chr13:95120752_95128782_-(Akt3);circRNA_1858|Chr13:95167819_95196402_-(Akt3);circRNA_1859|Chr13:95167819_95208329_-(Akt3);circRNA_1861|Chr13:95193009_95208329_-(Akt3);circRNA_2337|Chr15:51925689_51954838_-(Ppp3cc);circRNA_3379|Chr2:31816052_31816763_-(Pik3r1);circRNA_5406|Chr5:155702728_155709264_-(Cdc42);circRNA_6150|Chr7:114466514_11446…	rno04370
rno04371	Apelin signaling pathway	Environmental Information Processing	Signal transduction	29	340	111	2681	6.75289e-05	0.00231528	2.06012	circRNA_0380|Chr1:184008119_184017761_+(Pde3b);circRNA_0384|Chr1:184041764_184055555_+(Pde3b);circRNA_0650|Chr1:252537894_252539495_+(Acta2);circRNA_1397|Chr11:68722906_68725314_-(Adcy5);circRNA_1398|Chr11:68722906_68730129_-(Adcy5);circRNA_1399|Chr11:68745884_68750272_-(Adcy5);circRNA_1405|Chr11:69064518_69068514_-(Mylk);circRNA_1857|Chr13:95120752_95128782_-(Akt3);circRNA_1858|Chr13:95167819_95…	rno04371
rno04380	Osteoclast differentiation	Organismal Systems	Development and regeneration	9	340	64	2681	0.424596	0.70278	1.10887	circRNA_1857|Chr13:95120752_95128782_-(Akt3);circRNA_1858|Chr13:95167819_95196402_-(Akt3);circRNA_1859|Chr13:95167819_95208329_-(Akt3);circRNA_1861|Chr13:95193009_95208329_-(Akt3);circRNA_2337|Chr15:51925689_51954838_-(Ppp3cc);circRNA_3379|Chr2:31816052_31816763_-(Pik3r1);circRNA_3817|Chr2:240822115_240867796_-(Nfkb1);circRNA_4845|Chr4:147295666_147361944_+(Pparg);circRNA_6215|Chr7:130113212_1301…	rno04380
rno04390	Hippo signaling pathway	Environmental Information Processing	Signal transduction	10	340	84	2681	0.636677	0.844213	0.938725	circRNA_0373|Chr1:177521072_177569872_+(Tead1);circRNA_3031|Chr18:69634006_69647714_-(Smad4);circRNA_3037|Chr18:69654505_69657373_-(Smad4);circRNA_3059|Chr18:72593000_72611211_+(Smad2);circRNA_3280|Chr19:60370736_60429996_+(Pard3);circRNA_6075|Chr7:73684650_73748233_-(Stk3);circRNA_6077|Chr7:73808151_73848871_-(Stk3);circRNA_6079|Chr7:73834044_73848871_-(Stk3);circRNA_6271|Chr8:6014617_6023899_-(…	rno04390
rno04392	Hippo signaling pathway - multiple species	Environmental Information Processing	Signal transduction	5	340	26	2681	0.226848	0.490482	1.5164	circRNA_0373|Chr1:177521072_177569872_+(Tead1);circRNA_6075|Chr7:73684650_73748233_-(Stk3);circRNA_6077|Chr7:73808151_73848871_-(Stk3);circRNA_6079|Chr7:73834044_73848871_-(Stk3);circRNA_6272|Chr8:6135492_6161740_-(Yap1);	rno04392
rno04510	Focal adhesion	Cellular Processes	Cellular community - eukaryotes	26	340	192	2681	0.389239	0.672068	1.0678	circRNA_0370|Chr1:177389638_177397572_+(Parva);circRNA_0645|Chr1:251455609_251463748_+(Pten);circRNA_1155|Chr10:82756914_82757163_+(Col1a1);circRNA_1236|Chr10:96264760_96266403_-(Prkca);circRNA_1405|Chr11:69064518_69068514_-(Mylk);circRNA_1857|Chr13:95120752_95128782_-(Akt3);circRNA_1858|Chr13:95167819_95196402_-(Akt3);circRNA_1859|Chr13:95167819_95208329_-(Akt3);circRNA_1861|Chr13:95193009_95208…	rno04510
rno04512	ECM-receptor interaction	Environmental Information Processing	Signaling molecules and interaction	2	340	70	2681	0.999243	0.999243	0.225294	circRNA_1155|Chr10:82756914_82757163_+(Col1a1);circRNA_6680|Chr8:127289436_127301219_+(Itga9);	rno04512
rno04514	Cell adhesion molecules (CAMs)	Environmental Information Processing	Signaling molecules and interaction	5	340	51	2681	0.794086	0.918051	0.773068	circRNA_1838|Chr13:83815852_83819669_-(Mpzl1);circRNA_3751|Chr2:212852209_212852849_-(Ntng1);circRNA_3872|Chr20:3232306_3273815_+(RT1-T24-3);circRNA_6399|Chr8:63332376_63335340_-(Cd276);circRNA_6680|Chr8:127289436_127301219_+(Itga9);	rno04514
rno04520	Adherens junction	Cellular Processes	Cellular community - eukaryotes	15	340	112	2681	0.452665	0.735291	1.05607	circRNA_0271|Chr1:142556681_142565170_-(Iqgap1);circRNA_0696|Chr1:259412482_259459540_-(Sorbs1);circRNA_0697|Chr1:259421033_259437470_-(Sorbs1);circRNA_0703|Chr1:259434763_259479455_-(Sorbs1);circRNA_0715|Chr1:259479327_259488326_-(Sorbs1);circRNA_2158|Chr14:100058305_100066787_+(Egfr);circRNA_3031|Chr18:69634006_69647714_-(Smad4);circRNA_3037|Chr18:69654505_69657373_-(Smad4);circRNA_3059|Chr18:7…	rno04520
rno04530	Tight junction	Cellular Processes	Cellular community - eukaryotes	11	340	118	2681	0.901021	0.952621	0.73507	circRNA_0793|Chr10:776697_822670_+(Myh11);circRNA_0797|Chr10:800444_802135_+(Myh11);circRNA_0799|Chr10:805713_819703_+(Myh11);circRNA_3007|Chr18:60691028_60702777_+(Nedd4l);circRNA_3280|Chr19:60370736_60429996_+(Pard3);circRNA_4014|Chr20:50444171_50448905_+(Bves);circRNA_4814|Chr4:125762257_125789911_-(Magi1);circRNA_5406|Chr5:155702728_155709264_-(Cdc42);circRNA_5754|Chr6:103389817_103393554_-(A…	rno04530
rno04540	Gap junction	Cellular Processes	Cellular community - eukaryotes	13	340	65	2681	0.0603042	0.224942	1.57706	circRNA_1236|Chr10:96264760_96266403_-(Prkca);circRNA_1397|Chr11:68722906_68725314_-(Adcy5);circRNA_1398|Chr11:68722906_68730129_-(Adcy5);circRNA_1399|Chr11:68745884_68750272_-(Adcy5);circRNA_2141|Chr14:87328008_87331877_+(Adcy1);circRNA_2142|Chr14:87328008_87357732_+(Adcy1);circRNA_2143|Chr14:87328008_87377952_+(Adcy1);circRNA_2144|Chr14:87331763_87357732_+(Adcy1);circRNA_2145|Chr14:87350088_873…	rno04540
rno04550	Signaling pathways regulating pluripotency of stem cells	Cellular Processes	Cellular community - eukaryotes	12	340	60	2681	0.0694715	0.252624	1.57706	circRNA_0451|Chr1:200671013_200672411_-(Fgfr2);circRNA_1857|Chr13:95120752_95128782_-(Akt3);circRNA_1858|Chr13:95167819_95196402_-(Akt3);circRNA_1859|Chr13:95167819_95208329_-(Akt3);circRNA_1861|Chr13:95193009_95208329_-(Akt3);circRNA_3031|Chr18:69634006_69647714_-(Smad4);circRNA_3037|Chr18:69654505_69657373_-(Smad4);circRNA_3059|Chr18:72593000_72611211_+(Smad2);circRNA_3379|Chr2:31816052_3181676…	rno04550
rno04610	Complement and coagulation cascades	Organismal Systems	Immune system	1	340	12	2681	0.804252	0.918051	0.657108	circRNA_2686|Chr17:28580286_28608641_+(F13a1);	rno04610
rno04611	Platelet activation	Organismal Systems	Immune system	21	340	122	2681	0.0844771	0.281223	1.3573	circRNA_1155|Chr10:82756914_82757163_+(Col1a1);circRNA_1397|Chr11:68722906_68725314_-(Adcy5);circRNA_1398|Chr11:68722906_68730129_-(Adcy5);circRNA_1399|Chr11:68745884_68750272_-(Adcy5);circRNA_1405|Chr11:69064518_69068514_-(Mylk);circRNA_1857|Chr13:95120752_95128782_-(Akt3);circRNA_1858|Chr13:95167819_95196402_-(Akt3);circRNA_1859|Chr13:95167819_95208329_-(Akt3);circRNA_1861|Chr13:95193009_952083…	rno04611
rno04612	Antigen processing and presentation	Organismal Systems	Immune system	1	340	23	2681	0.956407	0.978853	0.342839	circRNA_3872|Chr20:3232306_3273815_+(RT1-T24-3);	rno04612
rno04620	Toll-like receptor signaling pathway	Organismal Systems	Immune system	7	340	33	2681	0.115114	0.321248	1.67264	circRNA_1857|Chr13:95120752_95128782_-(Akt3);circRNA_1858|Chr13:95167819_95196402_-(Akt3);circRNA_1859|Chr13:95167819_95208329_-(Akt3);circRNA_1861|Chr13:95193009_95208329_-(Akt3);circRNA_3379|Chr2:31816052_31816763_-(Pik3r1);circRNA_3817|Chr2:240822115_240867796_-(Nfkb1);circRNA_6215|Chr7:130113212_130116591_-(Mapk12);	rno04620
rno04621	NOD-like receptor signaling pathway	Organismal Systems	Immune system	10	340	64	2681	0.288289	0.581423	1.23208	circRNA_0993|Chr10:57627261_57634588_-(Dhx33);circRNA_0994|Chr10:57634023_57634588_-(Dhx33);circRNA_2271|Chr15:34277381_34277914_+(Rnf31);circRNA_3384|Chr2:33933956_33937260_-(Erbin);circRNA_3817|Chr2:240822115_240867796_-(Nfkb1);circRNA_6215|Chr7:130113212_130116591_-(Mapk12);circRNA_6271|Chr8:6014617_6023899_-(Birc2);circRNA_6642|Chr8:117106575_117109692_+(Rhoa);circRNA_6643|Chr8:117109572_1171…	rno04621
rno04622	RIG-I-like receptor signaling pathway	Organismal Systems	Immune system	2	340	23	2681	0.809405	0.918051	0.685678	circRNA_3817|Chr2:240822115_240867796_-(Nfkb1);circRNA_6215|Chr7:130113212_130116591_-(Mapk12);	rno04622
rno04623	Cytosolic DNA-sensing pathway	Organismal Systems	Immune system	1	340	11	2681	0.775688	0.910862	0.716845	circRNA_3817|Chr2:240822115_240867796_-(Nfkb1);	rno04623
rno04625	C-type lectin receptor signaling pathway	Organismal Systems	Immune system	13	340	69	2681	0.089296	0.285747	1.48564	circRNA_1368|Chr11:51049296_51068978_-(Cblb);circRNA_1369|Chr11:51057506_51068978_-(Cblb);circRNA_1857|Chr13:95120752_95128782_-(Akt3);circRNA_1858|Chr13:95167819_95196402_-(Akt3);circRNA_1859|Chr13:95167819_95208329_-(Akt3);circRNA_1861|Chr13:95193009_95208329_-(Akt3);circRNA_2337|Chr15:51925689_51954838_-(Ppp3cc);circRNA_3204|Chr19:38057557_38091369_+(Nfatc3);circRNA_3379|Chr2:31816052_31816763…	rno04625
rno04630	Jak-STAT signaling pathway	Environmental Information Processing	Signal transduction	12	340	52	2681	0.0259121	0.135194	1.81968	circRNA_1168|Chr10:85313576_85314836_+(Socs7);circRNA_1857|Chr13:95120752_95128782_-(Akt3);circRNA_1858|Chr13:95167819_95196402_-(Akt3);circRNA_1859|Chr13:95167819_95208329_-(Akt3);circRNA_1861|Chr13:95193009_95208329_-(Akt3);circRNA_2158|Chr14:100058305_100066787_+(Egfr);circRNA_3379|Chr2:31816052_31816763_-(Pik3r1);circRNA_3450|Chr2:56451097_56456188_+(Lifr);circRNA_5249|Chr5:120609027_12061674…	rno04630
rno04650	Natural killer cell mediated cytotoxicity	Organismal Systems	Immune system	6	340	60	2681	0.791843	0.918051	0.788529	circRNA_1236|Chr10:96264760_96266403_-(Prkca);circRNA_2337|Chr15:51925689_51954838_-(Ppp3cc);circRNA_3379|Chr2:31816052_31816763_-(Pik3r1);circRNA_3872|Chr20:3232306_3273815_+(RT1-T24-3);circRNA_5722|Chr6:91933750_91961861_-(Sos2);circRNA_5724|Chr6:91938501_91961861_-(Sos2);	rno04650
rno04657	IL-17 signaling pathway	Organismal Systems	Immune system	4	340	24	2681	0.362801	0.649809	1.31422	circRNA_1119|Chr10:75337353_75340473_+(Srsf1);circRNA_3817|Chr2:240822115_240867796_-(Nfkb1);circRNA_6215|Chr7:130113212_130116591_-(Mapk12);circRNA_7137|ChrX:54037977_54102885_+(Tab3);	rno04657
rno04658	Th1 and Th2 cell differentiation	Organismal Systems	Immune system	6	340	43	2681	0.468747	0.755028	1.10027	circRNA_2337|Chr15:51925689_51954838_-(Ppp3cc);circRNA_3204|Chr19:38057557_38091369_+(Nfatc3);circRNA_3569|Chr2:141024600_141026192_-(Maml3);circRNA_3701|Chr2:200243345_200253557_+(Notch2);circRNA_3817|Chr2:240822115_240867796_-(Nfkb1);circRNA_6215|Chr7:130113212_130116591_-(Mapk12);	rno04658
rno04659	Th17 cell differentiation	Organismal Systems	Immune system	7	340	61	2681	0.671299	0.866192	0.90487	circRNA_2337|Chr15:51925689_51954838_-(Ppp3cc);circRNA_3031|Chr18:69634006_69647714_-(Smad4);circRNA_3037|Chr18:69654505_69657373_-(Smad4);circRNA_3059|Chr18:72593000_72611211_+(Smad2);circRNA_3204|Chr19:38057557_38091369_+(Nfatc3);circRNA_3817|Chr2:240822115_240867796_-(Nfkb1);circRNA_6215|Chr7:130113212_130116591_-(Mapk12);	rno04659
rno04660	T cell receptor signaling pathway	Organismal Systems	Immune system	16	340	80	2681	0.0397388	0.172607	1.57706	circRNA_1368|Chr11:51049296_51068978_-(Cblb);circRNA_1369|Chr11:51057506_51068978_-(Cblb);circRNA_1857|Chr13:95120752_95128782_-(Akt3);circRNA_1858|Chr13:95167819_95196402_-(Akt3);circRNA_1859|Chr13:95167819_95208329_-(Akt3);circRNA_1861|Chr13:95193009_95208329_-(Akt3);circRNA_2337|Chr15:51925689_51954838_-(Ppp3cc);circRNA_3204|Chr19:38057557_38091369_+(Nfatc3);circRNA_3379|Chr2:31816052_31816763…	rno04660
rno04662	B cell receptor signaling pathway	Organismal Systems	Immune system	10	340	58	2681	0.192206	0.444179	1.35953	circRNA_1857|Chr13:95120752_95128782_-(Akt3);circRNA_1858|Chr13:95167819_95196402_-(Akt3);circRNA_1859|Chr13:95167819_95208329_-(Akt3);circRNA_1861|Chr13:95193009_95208329_-(Akt3);circRNA_2337|Chr15:51925689_51954838_-(Ppp3cc);circRNA_3204|Chr19:38057557_38091369_+(Nfatc3);circRNA_3379|Chr2:31816052_31816763_-(Pik3r1);circRNA_3817|Chr2:240822115_240867796_-(Nfkb1);circRNA_5722|Chr6:91933750_91961…	rno04662
rno04664	Fc epsilon RI signaling pathway	Organismal Systems	Immune system	9	340	40	2681	0.0581268	0.221435	1.77419	circRNA_1236|Chr10:96264760_96266403_-(Prkca);circRNA_1857|Chr13:95120752_95128782_-(Akt3);circRNA_1858|Chr13:95167819_95196402_-(Akt3);circRNA_1859|Chr13:95167819_95208329_-(Akt3);circRNA_1861|Chr13:95193009_95208329_-(Akt3);circRNA_3379|Chr2:31816052_31816763_-(Pik3r1);circRNA_5722|Chr6:91933750_91961861_-(Sos2);circRNA_5724|Chr6:91938501_91961861_-(Sos2);circRNA_6215|Chr7:130113212_130116591_-…	rno04664
rno04666	Fc gamma R-mediated phagocytosis	Organismal Systems	Immune system	10	340	51	2681	0.103004	0.303078	1.54614	circRNA_1236|Chr10:96264760_96266403_-(Prkca);circRNA_1857|Chr13:95120752_95128782_-(Akt3);circRNA_1858|Chr13:95167819_95196402_-(Akt3);circRNA_1859|Chr13:95167819_95208329_-(Akt3);circRNA_1861|Chr13:95193009_95208329_-(Akt3);circRNA_3379|Chr2:31816052_31816763_-(Pik3r1);circRNA_3512|Chr2:113739689_113745181_+(Pld1);circRNA_3515|Chr2:113747182_113764892_+(Pld1);circRNA_5406|Chr5:155702728_1557092…	rno04666
rno04668	TNF signaling pathway	Environmental Information Processing	Signal transduction	15	340	65	2681	0.0135322	0.0946233	1.81968	circRNA_1857|Chr13:95120752_95128782_-(Akt3);circRNA_1858|Chr13:95167819_95196402_-(Akt3);circRNA_1859|Chr13:95167819_95208329_-(Akt3);circRNA_1861|Chr13:95193009_95208329_-(Akt3);circRNA_3379|Chr2:31816052_31816763_-(Pik3r1);circRNA_3817|Chr2:240822115_240867796_-(Nfkb1);circRNA_4090|Chr3:15042229_15042609_+(Dab2ip);circRNA_4426|Chr3:150692740_150696569_+(Itch);circRNA_4430|Chr3:150717267_150734…	rno04668
rno04670	Leukocyte transendothelial migration	Organismal Systems	Immune system	10	340	63	2681	0.271335	0.561384	1.25163	circRNA_1236|Chr10:96264760_96266403_-(Prkca);circRNA_3379|Chr2:31816052_31816763_-(Pik3r1);circRNA_5406|Chr5:155702728_155709264_-(Cdc42);circRNA_5677|Chr6:73357940_73385888_+(Arhgap5);circRNA_5754|Chr6:103389817_103393554_-(Actn1);circRNA_6150|Chr7:114466514_114468769_-(Ptk2);circRNA_6155|Chr7:114555889_114562987_-(Ptk2);circRNA_6215|Chr7:130113212_130116591_-(Mapk12);circRNA_6642|Chr8:11710657…	rno04670
rno04713	Circadian entrainment	Organismal Systems	Environmental adaptation	19	340	77	2681	0.00258754	0.0368888	1.94572	circRNA_0839|Chr10:5930383_5930975_+(Grin2a);circRNA_1236|Chr10:96264760_96266403_-(Prkca);circRNA_1397|Chr11:68722906_68725314_-(Adcy5);circRNA_1398|Chr11:68722906_68730129_-(Adcy5);circRNA_1399|Chr11:68745884_68750272_-(Adcy5);circRNA_2141|Chr14:87328008_87331877_+(Adcy1);circRNA_2142|Chr14:87328008_87357732_+(Adcy1);circRNA_2143|Chr14:87328008_87377952_+(Adcy1);circRNA_2144|Chr14:87331763_8735…	rno04713
rno04714	Thermogenesis	Organismal Systems	Environmental adaptation	13	340	74	2681	0.13601	0.347259	1.38525	circRNA_1397|Chr11:68722906_68725314_-(Adcy5);circRNA_1398|Chr11:68722906_68730129_-(Adcy5);circRNA_1399|Chr11:68745884_68750272_-(Adcy5);circRNA_2141|Chr14:87328008_87331877_+(Adcy1);circRNA_2142|Chr14:87328008_87357732_+(Adcy1);circRNA_2143|Chr14:87328008_87377952_+(Adcy1);circRNA_2144|Chr14:87331763_87357732_+(Adcy1);circRNA_2145|Chr14:87350088_87357732_+(Adcy1);circRNA_4518|Chr4:6866069_68696…	rno04714
rno04720	Long-term potentiation	Organismal Systems	Nervous system	9	340	77	2681	0.657337	0.857396	0.921658	circRNA_0839|Chr10:5930383_5930975_+(Grin2a);circRNA_1236|Chr10:96264760_96266403_-(Prkca);circRNA_2141|Chr14:87328008_87331877_+(Adcy1);circRNA_2142|Chr14:87328008_87357732_+(Adcy1);circRNA_2143|Chr14:87328008_87377952_+(Adcy1);circRNA_2144|Chr14:87331763_87357732_+(Adcy1);circRNA_2145|Chr14:87350088_87357732_+(Adcy1);circRNA_2337|Chr15:51925689_51954838_-(Ppp3cc);circRNA_4864|Chr4:151118221_151…	rno04720
rno04721	Synaptic vesicle cycle	Organismal Systems	Nervous system	4	340	27	2681	0.45343	0.735291	1.16819	circRNA_0503|Chr1:214562895_214581660_+(Ap2a2);circRNA_0878|Chr10:16769713_16774652_-(Atp6v0e1);circRNA_3140|Chr19:25721379_25722171_+(Cacna1a);circRNA_6293|Chr8:22509215_22513080_+(Dnm2);	rno04721
rno04722	Neurotrophin signaling pathway	Organismal Systems	Nervous system	21	340	90	2681	0.00327093	0.0392512	1.8399	circRNA_0259|Chr1:139943398_139956356_-(Ntrk3);circRNA_1212|Chr10:94292693_94314584_+(Map3k3);circRNA_1857|Chr13:95120752_95128782_-(Akt3);circRNA_1858|Chr13:95167819_95196402_-(Akt3);circRNA_1859|Chr13:95167819_95208329_-(Akt3);circRNA_1861|Chr13:95193009_95208329_-(Akt3);circRNA_3149|Chr19:30869716_30870010_+(Gab1);circRNA_3150|Chr19:30869716_30883569_+(Gab1);circRNA_3379|Chr2:31816052_31816763…	rno04722
rno04723	Retrograde endocannabinoid signaling	Organismal Systems	Nervous system	12	340	54	2681	0.0341171	0.157464	1.75229	circRNA_1236|Chr10:96264760_96266403_-(Prkca);circRNA_1397|Chr11:68722906_68725314_-(Adcy5);circRNA_1398|Chr11:68722906_68730129_-(Adcy5);circRNA_1399|Chr11:68745884_68750272_-(Adcy5);circRNA_2141|Chr14:87328008_87331877_+(Adcy1);circRNA_2142|Chr14:87328008_87357732_+(Adcy1);circRNA_2143|Chr14:87328008_87377952_+(Adcy1);circRNA_2144|Chr14:87331763_87357732_+(Adcy1);circRNA_2145|Chr14:87350088_873…	rno04723
rno04724	Glutamatergic synapse	Organismal Systems	Nervous system	17	340	77	2681	0.0137992	0.0946233	1.74091	circRNA_0839|Chr10:5930383_5930975_+(Grin2a);circRNA_1236|Chr10:96264760_96266403_-(Prkca);circRNA_1397|Chr11:68722906_68725314_-(Adcy5);circRNA_1398|Chr11:68722906_68730129_-(Adcy5);circRNA_1399|Chr11:68745884_68750272_-(Adcy5);circRNA_2141|Chr14:87328008_87331877_+(Adcy1);circRNA_2142|Chr14:87328008_87357732_+(Adcy1);circRNA_2143|Chr14:87328008_87377952_+(Adcy1);circRNA_2144|Chr14:87331763_8735…	rno04724
rno04725	Cholinergic synapse	Organismal Systems	Nervous system	16	340	61	2681	0.0028748	0.0383307	2.06827	circRNA_1236|Chr10:96264760_96266403_-(Prkca);circRNA_1397|Chr11:68722906_68725314_-(Adcy5);circRNA_1398|Chr11:68722906_68730129_-(Adcy5);circRNA_1399|Chr11:68745884_68750272_-(Adcy5);circRNA_1857|Chr13:95120752_95128782_-(Akt3);circRNA_1858|Chr13:95167819_95196402_-(Akt3);circRNA_1859|Chr13:95167819_95208329_-(Akt3);circRNA_1861|Chr13:95193009_95208329_-(Akt3);circRNA_2141|Chr14:87328008_8733187…	rno04725
rno04726	Serotonergic synapse	Organismal Systems	Nervous system	9	340	59	2681	0.329341	0.613362	1.20284	circRNA_1236|Chr10:96264760_96266403_-(Prkca);circRNA_1299|Chr11:24479964_24512332_-(App);circRNA_1301|Chr11:24527899_24550752_-(App);circRNA_1302|Chr11:24547990_24550752_-(App);circRNA_1397|Chr11:68722906_68725314_-(Adcy5);circRNA_1398|Chr11:68722906_68730129_-(Adcy5);circRNA_1399|Chr11:68745884_68750272_-(Adcy5);circRNA_3140|Chr19:25721379_25722171_+(Cacna1a);circRNA_4864|Chr4:151118221_1511245…	rno04726
rno04727	GABAergic synapse	Organismal Systems	Nervous system	13	340	35	2681	0.000187489	0.00562466	2.92882	circRNA_1236|Chr10:96264760_96266403_-(Prkca);circRNA_1397|Chr11:68722906_68725314_-(Adcy5);circRNA_1398|Chr11:68722906_68730129_-(Adcy5);circRNA_1399|Chr11:68745884_68750272_-(Adcy5);circRNA_2141|Chr14:87328008_87331877_+(Adcy1);circRNA_2142|Chr14:87328008_87357732_+(Adcy1);circRNA_2143|Chr14:87328008_87377952_+(Adcy1);circRNA_2144|Chr14:87331763_87357732_+(Adcy1);circRNA_2145|Chr14:87350088_873…	rno04727
rno04728	Dopaminergic synapse	Organismal Systems	Nervous system	13	340	85	2681	0.275665	0.565467	1.20599	circRNA_0839|Chr10:5930383_5930975_+(Grin2a);circRNA_1236|Chr10:96264760_96266403_-(Prkca);circRNA_1397|Chr11:68722906_68725314_-(Adcy5);circRNA_1398|Chr11:68722906_68730129_-(Adcy5);circRNA_1399|Chr11:68745884_68750272_-(Adcy5);circRNA_1857|Chr13:95120752_95128782_-(Akt3);circRNA_1858|Chr13:95167819_95196402_-(Akt3);circRNA_1859|Chr13:95167819_95208329_-(Akt3);circRNA_1861|Chr13:95193009_9520832…	rno04728
rno04730	Long-term depression	Organismal Systems	Nervous system	2	340	48	2681	0.98864	0.993475	0.328554	circRNA_1236|Chr10:96264760_96266403_-(Prkca);circRNA_3140|Chr19:25721379_25722171_+(Cacna1a);	rno04730
rno04740	Olfactory transduction	Organismal Systems	Sensory system	4	340	20	2681	0.242335	0.51929	1.57706	circRNA_5502|Chr6:4259110_4315062_-(Slc8a1);circRNA_5503|Chr6:4278307_4315062_-(Slc8a1);circRNA_5504|Chr6:4298605_4315062_-(Slc8a1);circRNA_6105|Chr7:76229137_76229533_-(Ncald);	rno04740
rno04742	Taste transduction	Organismal Systems	Sensory system	2	340	8	2681	0.269347	0.561384	1.97132	circRNA_3140|Chr19:25721379_25722171_+(Cacna1a);circRNA_4864|Chr4:151118221_151124504_-(Cacna1c);	rno04742
rno04750	Inflammatory mediator regulation of TRP channels	Organismal Systems	Sensory system	12	340	52	2681	0.0259121	0.135194	1.81968	circRNA_1236|Chr10:96264760_96266403_-(Prkca);circRNA_1397|Chr11:68722906_68725314_-(Adcy5);circRNA_1398|Chr11:68722906_68730129_-(Adcy5);circRNA_1399|Chr11:68745884_68750272_-(Adcy5);circRNA_2141|Chr14:87328008_87331877_+(Adcy1);circRNA_2142|Chr14:87328008_87357732_+(Adcy1);circRNA_2143|Chr14:87328008_87377952_+(Adcy1);circRNA_2144|Chr14:87331763_87357732_+(Adcy1);circRNA_2145|Chr14:87350088_873…	rno04750
rno04810	Regulation of actin cytoskeleton	Cellular Processes	Cell motility	20	340	174	2681	0.721728	0.897486	0.906356	circRNA_0271|Chr1:142556681_142565170_-(Iqgap1);circRNA_0451|Chr1:200671013_200672411_-(Fgfr2);circRNA_1405|Chr11:69064518_69068514_-(Mylk);circRNA_1875|Chr13:100300002_100353039_-(Enah);circRNA_2158|Chr14:100058305_100066787_+(Egfr);circRNA_3379|Chr2:31816052_31816763_-(Pik3r1);circRNA_5406|Chr5:155702728_155709264_-(Cdc42);circRNA_5722|Chr6:91933750_91961861_-(Sos2);circRNA_5724|Chr6:91938501_9…	rno04810
rno04910	Insulin signaling pathway	Organismal Systems	Endocrine system	17	340	100	2681	0.123028	0.33176	1.3405	circRNA_0380|Chr1:184008119_184017761_+(Pde3b);circRNA_0384|Chr1:184041764_184055555_+(Pde3b);circRNA_0696|Chr1:259412482_259459540_-(Sorbs1);circRNA_0697|Chr1:259421033_259437470_-(Sorbs1);circRNA_0703|Chr1:259434763_259479455_-(Sorbs1);circRNA_0715|Chr1:259479327_259488326_-(Sorbs1);circRNA_1368|Chr11:51049296_51068978_-(Cblb);circRNA_1369|Chr11:51057506_51068978_-(Cblb);circRNA_1857|Chr13:9512…	rno04910
rno04911	Insulin secretion	Organismal Systems	Endocrine system	12	340	56	2681	0.0440262	0.17909	1.68971	circRNA_1236|Chr10:96264760_96266403_-(Prkca);circRNA_1397|Chr11:68722906_68725314_-(Adcy5);circRNA_1398|Chr11:68722906_68730129_-(Adcy5);circRNA_1399|Chr11:68745884_68750272_-(Adcy5);circRNA_2141|Chr14:87328008_87331877_+(Adcy1);circRNA_2142|Chr14:87328008_87357732_+(Adcy1);circRNA_2143|Chr14:87328008_87377952_+(Adcy1);circRNA_2144|Chr14:87331763_87357732_+(Adcy1);circRNA_2145|Chr14:87350088_873…	rno04911
rno04912	GnRH signaling pathway	Organismal Systems	Endocrine system	18	340	83	2681	0.0137531	0.0946233	1.71006	circRNA_1212|Chr10:94292693_94314584_+(Map3k3);circRNA_1236|Chr10:96264760_96266403_-(Prkca);circRNA_1397|Chr11:68722906_68725314_-(Adcy5);circRNA_1398|Chr11:68722906_68730129_-(Adcy5);circRNA_1399|Chr11:68745884_68750272_-(Adcy5);circRNA_2141|Chr14:87328008_87331877_+(Adcy1);circRNA_2142|Chr14:87328008_87357732_+(Adcy1);circRNA_2143|Chr14:87328008_87377952_+(Adcy1);circRNA_2144|Chr14:87331763_87…	rno04912
rno04913	Ovarian Steroidogenesis	Organismal Systems	Endocrine system	8	340	19	2681	0.00131045	0.024193	3.32012	circRNA_1397|Chr11:68722906_68725314_-(Adcy5);circRNA_1398|Chr11:68722906_68730129_-(Adcy5);circRNA_1399|Chr11:68745884_68750272_-(Adcy5);circRNA_2141|Chr14:87328008_87331877_+(Adcy1);circRNA_2142|Chr14:87328008_87357732_+(Adcy1);circRNA_2143|Chr14:87328008_87377952_+(Adcy1);circRNA_2144|Chr14:87331763_87357732_+(Adcy1);circRNA_2145|Chr14:87350088_87357732_+(Adcy1);	rno04913
rno04914	Progesterone-mediated oocyte maturation	Organismal Systems	Endocrine system	19	340	59	2681	6.29121e-05	0.00231528	2.53933	circRNA_0380|Chr1:184008119_184017761_+(Pde3b);circRNA_0384|Chr1:184041764_184055555_+(Pde3b);circRNA_0661|Chr1:255685048_255694514_-(Cpeb3);circRNA_0663|Chr1:255727112_255764689_-(Cpeb3);circRNA_1397|Chr11:68722906_68725314_-(Adcy5);circRNA_1398|Chr11:68722906_68730129_-(Adcy5);circRNA_1399|Chr11:68745884_68750272_-(Adcy5);circRNA_1643|Chr12:39627016_39635912_-(Anapc7);circRNA_1857|Chr13:9512075…	rno04914
rno04915	Estrogen signaling pathway	Organismal Systems	Endocrine system	16	340	67	2681	0.00776876	0.0745801	1.88306	circRNA_1397|Chr11:68722906_68725314_-(Adcy5);circRNA_1398|Chr11:68722906_68730129_-(Adcy5);circRNA_1399|Chr11:68745884_68750272_-(Adcy5);circRNA_1857|Chr13:95120752_95128782_-(Akt3);circRNA_1858|Chr13:95167819_95196402_-(Akt3);circRNA_1859|Chr13:95167819_95208329_-(Akt3);circRNA_1861|Chr13:95193009_95208329_-(Akt3);circRNA_2141|Chr14:87328008_87331877_+(Adcy1);circRNA_2142|Chr14:87328008_8735773…	rno04915
rno04916	Melanogenesis	Organismal Systems	Endocrine system	9	340	48	2681	0.145731	0.364963	1.47849	circRNA_1236|Chr10:96264760_96266403_-(Prkca);circRNA_1397|Chr11:68722906_68725314_-(Adcy5);circRNA_1398|Chr11:68722906_68730129_-(Adcy5);circRNA_1399|Chr11:68745884_68750272_-(Adcy5);circRNA_2141|Chr14:87328008_87331877_+(Adcy1);circRNA_2142|Chr14:87328008_87357732_+(Adcy1);circRNA_2143|Chr14:87328008_87377952_+(Adcy1);circRNA_2144|Chr14:87331763_87357732_+(Adcy1);circRNA_2145|Chr14:87350088_873…	rno04916
rno04917	Prolactin signaling pathway	Organismal Systems	Endocrine system	10	340	33	2681	0.00588268	0.0672307	2.38948	circRNA_1168|Chr10:85313576_85314836_+(Socs7);circRNA_1857|Chr13:95120752_95128782_-(Akt3);circRNA_1858|Chr13:95167819_95196402_-(Akt3);circRNA_1859|Chr13:95167819_95208329_-(Akt3);circRNA_1861|Chr13:95193009_95208329_-(Akt3);circRNA_3379|Chr2:31816052_31816763_-(Pik3r1);circRNA_3817|Chr2:240822115_240867796_-(Nfkb1);circRNA_5722|Chr6:91933750_91961861_-(Sos2);circRNA_5724|Chr6:91938501_91961861_…	rno04917
rno04918	Thyroid hormone synthesis	Organismal Systems	Endocrine system	11	340	46	2681	0.0251914	0.135194	1.88561	circRNA_1236|Chr10:96264760_96266403_-(Prkca);circRNA_1397|Chr11:68722906_68725314_-(Adcy5);circRNA_1398|Chr11:68722906_68730129_-(Adcy5);circRNA_1399|Chr11:68745884_68750272_-(Adcy5);circRNA_2141|Chr14:87328008_87331877_+(Adcy1);circRNA_2142|Chr14:87328008_87357732_+(Adcy1);circRNA_2143|Chr14:87328008_87377952_+(Adcy1);circRNA_2144|Chr14:87331763_87357732_+(Adcy1);circRNA_2145|Chr14:87350088_873…	rno04918
rno04919	Thyroid hormone signaling pathway	Organismal Systems	Endocrine system	10	340	88	2681	0.695933	0.893176	0.896056	circRNA_1236|Chr10:96264760_96266403_-(Prkca);circRNA_1857|Chr13:95120752_95128782_-(Akt3);circRNA_1858|Chr13:95167819_95196402_-(Akt3);circRNA_1859|Chr13:95167819_95208329_-(Akt3);circRNA_1861|Chr13:95193009_95208329_-(Akt3);circRNA_3379|Chr2:31816052_31816763_-(Pik3r1);circRNA_3701|Chr2:200243345_200253557_+(Notch2);circRNA_3998|Chr20:45189472_45193661_-(Slc16a10);circRNA_4518|Chr4:6866069_6869…	rno04919
rno04920	Adipocytokine signaling pathway	Organismal Systems	Endocrine system	6	340	30	2681	0.17141	0.411384	1.57706	circRNA_1857|Chr13:95120752_95128782_-(Akt3);circRNA_1858|Chr13:95167819_95196402_-(Akt3);circRNA_1859|Chr13:95167819_95208329_-(Akt3);circRNA_1861|Chr13:95193009_95208329_-(Akt3);circRNA_3817|Chr2:240822115_240867796_-(Nfkb1);circRNA_5249|Chr5:120609027_120616745_+(Lepr);	rno04920
rno04921	Oxytocin signaling pathway	Organismal Systems	Endocrine system	24	340	140	2681	0.0709475	0.25414	1.35176	circRNA_1236|Chr10:96264760_96266403_-(Prkca);circRNA_1397|Chr11:68722906_68725314_-(Adcy5);circRNA_1398|Chr11:68722906_68730129_-(Adcy5);circRNA_1399|Chr11:68745884_68750272_-(Adcy5);circRNA_1405|Chr11:69064518_69068514_-(Mylk);circRNA_2141|Chr14:87328008_87331877_+(Adcy1);circRNA_2142|Chr14:87328008_87357732_+(Adcy1);circRNA_2143|Chr14:87328008_87377952_+(Adcy1);circRNA_2144|Chr14:87331763_8735…	rno04921
rno04922	Glucagon signaling pathway	Organismal Systems	Endocrine system	8	340	88	2681	0.887545	0.946715	0.716845	circRNA_0380|Chr1:184008119_184017761_+(Pde3b);circRNA_0384|Chr1:184041764_184055555_+(Pde3b);circRNA_1857|Chr13:95120752_95128782_-(Akt3);circRNA_1858|Chr13:95167819_95196402_-(Akt3);circRNA_1859|Chr13:95167819_95208329_-(Akt3);circRNA_1861|Chr13:95193009_95208329_-(Akt3);circRNA_2337|Chr15:51925689_51954838_-(Ppp3cc);circRNA_3126|Chr19:22113525_22128599_-(Phkb);	rno04922
rno04923	Regulation of lipolysis in adipocyte	Organismal Systems	Endocrine system	15	340	35	2681	7.73324e-06	0.000618659	3.37941	circRNA_0380|Chr1:184008119_184017761_+(Pde3b);circRNA_0384|Chr1:184041764_184055555_+(Pde3b);circRNA_1397|Chr11:68722906_68725314_-(Adcy5);circRNA_1398|Chr11:68722906_68730129_-(Adcy5);circRNA_1399|Chr11:68745884_68750272_-(Adcy5);circRNA_1857|Chr13:95120752_95128782_-(Akt3);circRNA_1858|Chr13:95167819_95196402_-(Akt3);circRNA_1859|Chr13:95167819_95208329_-(Akt3);circRNA_1861|Chr13:95193009_9520…	rno04923
rno04924	Renin secretion	Organismal Systems	Endocrine system	8	340	65	2681	0.593919	0.823933	0.970498	circRNA_0380|Chr1:184008119_184017761_+(Pde3b);circRNA_0384|Chr1:184041764_184055555_+(Pde3b);circRNA_1397|Chr11:68722906_68725314_-(Adcy5);circRNA_1398|Chr11:68722906_68730129_-(Adcy5);circRNA_1399|Chr11:68745884_68750272_-(Adcy5);circRNA_2212|Chr15:907065_977590_+(Kcnma1);circRNA_2337|Chr15:51925689_51954838_-(Ppp3cc);circRNA_4864|Chr4:151118221_151124504_-(Cacna1c);	rno04924
rno04925	Aldosterone synthesis and secretion	Organismal Systems	Endocrine system	13	340	62	2681	0.0432659	0.179031	1.65337	circRNA_1236|Chr10:96264760_96266403_-(Prkca);circRNA_1397|Chr11:68722906_68725314_-(Adcy5);circRNA_1398|Chr11:68722906_68730129_-(Adcy5);circRNA_1399|Chr11:68745884_68750272_-(Adcy5);circRNA_1725|Chr13:50150091_50150276_-(Atp2b4);circRNA_2141|Chr14:87328008_87331877_+(Adcy1);circRNA_2142|Chr14:87328008_87357732_+(Adcy1);circRNA_2143|Chr14:87328008_87377952_+(Adcy1);circRNA_2144|Chr14:87331763_87…	rno04925
rno04926	Relaxin signaling pathway	Organismal Systems	Endocrine system	22	340	104	2681	0.0091769	0.0847098	1.66804	circRNA_0650|Chr1:252537894_252539495_+(Acta2);circRNA_1155|Chr10:82756914_82757163_+(Col1a1);circRNA_1236|Chr10:96264760_96266403_-(Prkca);circRNA_1397|Chr11:68722906_68725314_-(Adcy5);circRNA_1398|Chr11:68722906_68730129_-(Adcy5);circRNA_1399|Chr11:68745884_68750272_-(Adcy5);circRNA_1857|Chr13:95120752_95128782_-(Akt3);circRNA_1858|Chr13:95167819_95196402_-(Akt3);circRNA_1859|Chr13:95167819_952…	rno04926
rno04927	Cortisol synthesis and secretion	Organismal Systems	Endocrine system	11	340	49	2681	0.0388844	0.172607	1.77017	circRNA_0277|Chr1:143107055_143109260_+(Pde8a);circRNA_0279|Chr1:143143055_143143524_+(Pde8a);circRNA_1397|Chr11:68722906_68725314_-(Adcy5);circRNA_1398|Chr11:68722906_68730129_-(Adcy5);circRNA_1399|Chr11:68745884_68750272_-(Adcy5);circRNA_2141|Chr14:87328008_87331877_+(Adcy1);circRNA_2142|Chr14:87328008_87357732_+(Adcy1);circRNA_2143|Chr14:87328008_87377952_+(Adcy1);circRNA_2144|Chr14:87331763_8…	rno04927
rno04930	Type II diabetes mellitus	Human Diseases	Endocrine and metabolic disease	3	340	18	2681	0.40443	0.69009	1.31422	circRNA_3140|Chr19:25721379_25722171_+(Cacna1a);circRNA_3379|Chr2:31816052_31816763_-(Pik3r1);circRNA_4864|Chr4:151118221_151124504_-(Cacna1c);	rno04930
rno04931	Insulin resistance	Human Diseases	Endocrine and metabolic disease	7	340	51	2681	0.473889	0.758223	1.0823	circRNA_0645|Chr1:251455609_251463748_+(Pten);circRNA_1857|Chr13:95120752_95128782_-(Akt3);circRNA_1858|Chr13:95167819_95196402_-(Akt3);circRNA_1859|Chr13:95167819_95208329_-(Akt3);circRNA_1861|Chr13:95193009_95208329_-(Akt3);circRNA_3379|Chr2:31816052_31816763_-(Pik3r1);circRNA_3817|Chr2:240822115_240867796_-(Nfkb1);	rno04931
rno04932	Non-alcoholic fatty liver disease (NAFLD)	Human Diseases	Endocrine and metabolic disease	10	340	59	2681	0.207159	0.464656	1.33649	circRNA_1857|Chr13:95120752_95128782_-(Akt3);circRNA_1858|Chr13:95167819_95196402_-(Akt3);circRNA_1859|Chr13:95167819_95208329_-(Akt3);circRNA_1861|Chr13:95193009_95208329_-(Akt3);circRNA_3379|Chr2:31816052_31816763_-(Pik3r1);circRNA_3817|Chr2:240822115_240867796_-(Nfkb1);circRNA_4426|Chr3:150692740_150696569_+(Itch);circRNA_4430|Chr3:150717267_150734719_+(Itch);circRNA_5249|Chr5:120609027_120616…	rno04932
rno04933	AGE-RAGE signaling pathway in diabetic complications	Human Diseases	Endocrine and metabolic disease	13	340	94	2681	0.413718	0.699242	1.09052	circRNA_1155|Chr10:82756914_82757163_+(Col1a1);circRNA_1236|Chr10:96264760_96266403_-(Prkca);circRNA_1857|Chr13:95120752_95128782_-(Akt3);circRNA_1858|Chr13:95167819_95196402_-(Akt3);circRNA_1859|Chr13:95167819_95208329_-(Akt3);circRNA_1861|Chr13:95193009_95208329_-(Akt3);circRNA_3031|Chr18:69634006_69647714_-(Smad4);circRNA_3037|Chr18:69654505_69657373_-(Smad4);circRNA_3059|Chr18:72593000_726112…	rno04933
rno04934	Cushing's syndrome	Human Diseases	Endocrine and metabolic disease	14	340	79	2681	0.118507	0.324366	1.39739	circRNA_0277|Chr1:143107055_143109260_+(Pde8a);circRNA_0279|Chr1:143143055_143143524_+(Pde8a);circRNA_1397|Chr11:68722906_68725314_-(Adcy5);circRNA_1398|Chr11:68722906_68730129_-(Adcy5);circRNA_1399|Chr11:68745884_68750272_-(Adcy5);circRNA_2141|Chr14:87328008_87331877_+(Adcy1);circRNA_2142|Chr14:87328008_87357732_+(Adcy1);circRNA_2143|Chr14:87328008_87377952_+(Adcy1);circRNA_2144|Chr14:87331763_8…	rno04934
rno04940	Type I diabetes mellitus	Human Diseases	Endocrine and metabolic disease	1	340	15	2681	0.869956	0.936276	0.525686	circRNA_3872|Chr20:3232306_3273815_+(RT1-T24-3);	rno04940
rno04960	Aldosterone-regulated sodium reabsorption	Organismal Systems	Excretory system	4	340	23	2681	0.332263	0.613408	1.37136	circRNA_1236|Chr10:96264760_96266403_-(Prkca);circRNA_3007|Chr18:60691028_60702777_+(Nedd4l);circRNA_3379|Chr2:31816052_31816763_-(Pik3r1);circRNA_6597|Chr8:104192886_104202285_-(Atp1b3);	rno04960
rno04961	Endocrine and other factor-regulated calcium reabsorption	Organismal Systems	Excretory system	7	340	39	2681	0.217746	0.479603	1.41531	circRNA_0503|Chr1:214562895_214581660_+(Ap2a2);circRNA_1236|Chr10:96264760_96266403_-(Prkca);circRNA_5502|Chr6:4259110_4315062_-(Slc8a1);circRNA_5503|Chr6:4278307_4315062_-(Slc8a1);circRNA_5504|Chr6:4298605_4315062_-(Slc8a1);circRNA_6293|Chr8:22509215_22513080_+(Dnm2);circRNA_6597|Chr8:104192886_104202285_-(Atp1b3);	rno04961
rno04962	Vasopressin-regulated water reabsorption	Organismal Systems	Excretory system	1	340	13	2681	0.829188	0.918051	0.606561	circRNA_4768|Chr4:114879427_114880228_+(Dctn1);	rno04962
rno04964	Proximal tubule bicarbonate reclamation	Organismal Systems	Excretory system	2	340	10	2681	0.368225	0.649809	1.57706	circRNA_6597|Chr8:104192886_104202285_-(Atp1b3);circRNA_6847|Chr9:54232163_54248877_+(Gls);	rno04964
rno04970	Salivary secretion	Organismal Systems	Digestive system	17	340	67	2681	0.0031431	0.0392512	2.00075	circRNA_1236|Chr10:96264760_96266403_-(Prkca);circRNA_1397|Chr11:68722906_68725314_-(Adcy5);circRNA_1398|Chr11:68722906_68730129_-(Adcy5);circRNA_1399|Chr11:68745884_68750272_-(Adcy5);circRNA_1725|Chr13:50150091_50150276_-(Atp2b4);circRNA_2141|Chr14:87328008_87331877_+(Adcy1);circRNA_2142|Chr14:87328008_87357732_+(Adcy1);circRNA_2143|Chr14:87328008_87377952_+(Adcy1);circRNA_2144|Chr14:87331763_87…	rno04970
rno04971	Gastric acid secretion	Organismal Systems	Digestive system	11	340	49	2681	0.0388844	0.172607	1.77017	circRNA_1236|Chr10:96264760_96266403_-(Prkca);circRNA_1397|Chr11:68722906_68725314_-(Adcy5);circRNA_1398|Chr11:68722906_68730129_-(Adcy5);circRNA_1399|Chr11:68745884_68750272_-(Adcy5);circRNA_1405|Chr11:69064518_69068514_-(Mylk);circRNA_2141|Chr14:87328008_87331877_+(Adcy1);circRNA_2142|Chr14:87328008_87357732_+(Adcy1);circRNA_2143|Chr14:87328008_87377952_+(Adcy1);circRNA_2144|Chr14:87331763_8735…	rno04971
rno04972	Pancreatic secretion	Organismal Systems	Digestive system	14	340	55	2681	0.00692336	0.0741874	2.00717	circRNA_1236|Chr10:96264760_96266403_-(Prkca);circRNA_1397|Chr11:68722906_68725314_-(Adcy5);circRNA_1398|Chr11:68722906_68730129_-(Adcy5);circRNA_1399|Chr11:68745884_68750272_-(Adcy5);circRNA_1725|Chr13:50150091_50150276_-(Atp2b4);circRNA_2141|Chr14:87328008_87331877_+(Adcy1);circRNA_2142|Chr14:87328008_87357732_+(Adcy1);circRNA_2143|Chr14:87328008_87377952_+(Adcy1);circRNA_2144|Chr14:87331763_87…	rno04972
rno04973	Carbohydrate digestion and absorption	Organismal Systems	Digestive system	6	340	17	2681	0.0144821	0.0965471	2.78304	circRNA_1857|Chr13:95120752_95128782_-(Akt3);circRNA_1858|Chr13:95167819_95196402_-(Akt3);circRNA_1859|Chr13:95167819_95208329_-(Akt3);circRNA_1861|Chr13:95193009_95208329_-(Akt3);circRNA_3379|Chr2:31816052_31816763_-(Pik3r1);circRNA_6597|Chr8:104192886_104202285_-(Atp1b3);	rno04973
rno04974	Protein digestion and absorption	Organismal Systems	Digestive system	7	340	58	2681	0.616868	0.831732	0.951673	circRNA_1155|Chr10:82756914_82757163_+(Col1a1);circRNA_2270|Chr15:33015618_33017521_-(Slc7a7);circRNA_3998|Chr20:45189472_45193661_-(Slc16a10);circRNA_5502|Chr6:4259110_4315062_-(Slc8a1);circRNA_5503|Chr6:4278307_4315062_-(Slc8a1);circRNA_5504|Chr6:4298605_4315062_-(Slc8a1);circRNA_6597|Chr8:104192886_104202285_-(Atp1b3);	rno04974
rno04976	Bile secretion	Organismal Systems	Digestive system	9	340	19	2681	0.000220169	0.00587117	3.73514	circRNA_1397|Chr11:68722906_68725314_-(Adcy5);circRNA_1398|Chr11:68722906_68730129_-(Adcy5);circRNA_1399|Chr11:68745884_68750272_-(Adcy5);circRNA_2141|Chr14:87328008_87331877_+(Adcy1);circRNA_2142|Chr14:87328008_87357732_+(Adcy1);circRNA_2143|Chr14:87328008_87377952_+(Adcy1);circRNA_2144|Chr14:87331763_87357732_+(Adcy1);circRNA_2145|Chr14:87350088_87357732_+(Adcy1);circRNA_6597|Chr8:104192886_104…	rno04976
rno04978	Mineral absorption	Organismal Systems	Digestive system	4	340	11	2681	0.0404996	0.172607	2.86738	circRNA_5502|Chr6:4259110_4315062_-(Slc8a1);circRNA_5503|Chr6:4278307_4315062_-(Slc8a1);circRNA_5504|Chr6:4298605_4315062_-(Slc8a1);circRNA_6597|Chr8:104192886_104202285_-(Atp1b3);	rno04978
rno05010	Alzheimer's disease	Human Diseases	Neurodegenerative disease	13	340	92	2681	0.382213	0.668906	1.11423	circRNA_0666|Chr1:255931357_255935277_-(Ide);circRNA_0671|Chr1:255970949_255976428_-(Ide);circRNA_0839|Chr10:5930383_5930975_+(Grin2a);circRNA_1299|Chr11:24479964_24512332_-(App);circRNA_1301|Chr11:24527899_24550752_-(App);circRNA_1302|Chr11:24547990_24550752_-(App);circRNA_2337|Chr15:51925689_51954838_-(Ppp3cc);circRNA_4270|Chr3:104125824_104126822_-(Ryr3);circRNA_4272|Chr3:104155193_104159664_-…	rno05010
rno05012	Parkinson's disease	Human Diseases	Neurodegenerative disease	6	340	20	2681	0.0326492	0.153643	2.36559	circRNA_0999|Chr10:59192184_59239990_+(Ube2g1);circRNA_1397|Chr11:68722906_68725314_-(Adcy5);circRNA_1398|Chr11:68722906_68730129_-(Adcy5);circRNA_1399|Chr11:68745884_68750272_-(Adcy5);circRNA_6222|Chr7:132867046_132873732_+(Lrrk2);circRNA_7064|ChrX:1729687_1730287_-(Uba1);	rno05012
rno05014	Amyotrophic lateral sclerosis (ALS)	Human Diseases	Neurodegenerative disease	3	340	30	2681	0.752989	0.910862	0.788529	circRNA_0839|Chr10:5930383_5930975_+(Grin2a);circRNA_2337|Chr15:51925689_51954838_-(Ppp3cc);circRNA_6215|Chr7:130113212_130116591_-(Mapk12);	rno05014
rno05016	Huntington's disease	Human Diseases	Neurodegenerative disease	8	340	61	2681	0.517887	0.781716	1.03414	circRNA_0503|Chr1:214562895_214581660_+(Ap2a2);circRNA_2866|Chr18:6218154_6233603_+(Taf4b);circRNA_2869|Chr18:6249297_6279570_+(Taf4b);circRNA_4633|Chr4:57387152_57396104_+(Nrf1);circRNA_4768|Chr4:114879427_114880228_+(Dctn1);circRNA_4845|Chr4:147295666_147361944_+(Pparg);circRNA_5771|Chr6:107620059_107621884_+(Dnal1);circRNA_5881|Chr6:135533315_135544421_+(Rcor1);	rno05016
rno05030	Cocaine addiction	Human Diseases	Substance dependence	5	340	15	2681	0.0324439	0.153643	2.62843	circRNA_0839|Chr10:5930383_5930975_+(Grin2a);circRNA_1397|Chr11:68722906_68725314_-(Adcy5);circRNA_1398|Chr11:68722906_68730129_-(Adcy5);circRNA_1399|Chr11:68745884_68750272_-(Adcy5);circRNA_3817|Chr2:240822115_240867796_-(Nfkb1);	rno05030
rno05031	Amphetamine addiction	Human Diseases	Substance dependence	7	340	45	2681	0.342575	0.627619	1.2266	circRNA_0839|Chr10:5930383_5930975_+(Grin2a);circRNA_1236|Chr10:96264760_96266403_-(Prkca);circRNA_1397|Chr11:68722906_68725314_-(Adcy5);circRNA_1398|Chr11:68722906_68730129_-(Adcy5);circRNA_1399|Chr11:68745884_68750272_-(Adcy5);circRNA_2337|Chr15:51925689_51954838_-(Ppp3cc);circRNA_4864|Chr4:151118221_151124504_-(Cacna1c);	rno05031
rno05032	Morphine addiction	Human Diseases	Substance dependence	16	340	39	2681	7.57639e-06	0.000618659	3.23499	circRNA_0277|Chr1:143107055_143109260_+(Pde8a);circRNA_0279|Chr1:143143055_143143524_+(Pde8a);circRNA_0380|Chr1:184008119_184017761_+(Pde3b);circRNA_0384|Chr1:184041764_184055555_+(Pde3b);circRNA_1236|Chr10:96264760_96266403_-(Prkca);circRNA_1397|Chr11:68722906_68725314_-(Adcy5);circRNA_1398|Chr11:68722906_68730129_-(Adcy5);circRNA_1399|Chr11:68745884_68750272_-(Adcy5);circRNA_2096|Chr14:81267948…	rno05032
rno05034	Alcoholism	Human Diseases	Substance dependence	6	340	36	2681	0.302064	0.594224	1.31422	circRNA_0839|Chr10:5930383_5930975_+(Grin2a);circRNA_1397|Chr11:68722906_68725314_-(Adcy5);circRNA_1398|Chr11:68722906_68730129_-(Adcy5);circRNA_1399|Chr11:68745884_68750272_-(Adcy5);circRNA_5722|Chr6:91933750_91961861_-(Sos2);circRNA_5724|Chr6:91938501_91961861_-(Sos2);	rno05034
rno05100	Bacterial invasion of epithelial cells	Human Diseases	Infectious disease: bacterial	19	340	89	2681	0.0136173	0.0946233	1.68338	circRNA_3149|Chr19:30869716_30870010_+(Gab1);circRNA_3150|Chr19:30869716_30883569_+(Gab1);circRNA_3172|Chr19:34207716_34207946_+(Arhgap10);circRNA_3177|Chr19:34239430_34241861_+(Arhgap10);circRNA_3179|Chr19:34249087_34272145_+(Arhgap10);circRNA_3180|Chr19:34249087_34272192_+(Arhgap10);circRNA_3182|Chr19:34266719_34272192_+(Arhgap10);circRNA_3183|Chr19:34270069_34298610_+(Arhgap10);circRNA_3187|Ch…	rno05100
rno05132	Salmonella infection	Human Diseases	Infectious disease: bacterial	5	340	42	2681	0.631208	0.841611	0.938725	circRNA_3817|Chr2:240822115_240867796_-(Nfkb1);circRNA_5406|Chr5:155702728_155709264_-(Cdc42);circRNA_5896|Chr6:136348651_136358127_+(Klc1);circRNA_6215|Chr7:130113212_130116591_-(Mapk12);circRNA_7233|ChrX:156468826_156469166_+(Flna);	rno05132
rno05133	Pertussis	Human Diseases	Infectious disease: bacterial	4	340	17	2681	0.159656	0.387044	1.85536	circRNA_3817|Chr2:240822115_240867796_-(Nfkb1);circRNA_6215|Chr7:130113212_130116591_-(Mapk12);circRNA_6642|Chr8:117106575_117109692_+(Rhoa);circRNA_6643|Chr8:117109572_117114039_+(Rhoa);	rno05133
rno05134	Legionellosis	Human Diseases	Infectious disease: bacterial	2	340	13	2681	0.505019	0.767118	1.21312	circRNA_0041|Chr1:16859047_16879498_+(Hbs1l);circRNA_3817|Chr2:240822115_240867796_-(Nfkb1);	rno05134
rno05140	Leishmaniasis	Human Diseases	Infectious disease: parasitic	2	340	13	2681	0.505019	0.767118	1.21312	circRNA_3817|Chr2:240822115_240867796_-(Nfkb1);circRNA_6215|Chr7:130113212_130116591_-(Mapk12);	rno05140
rno05142	Chagas disease (American trypanosomiasis)	Human Diseases	Infectious disease: parasitic	13	340	52	2681	0.0106916	0.0916426	1.97132	circRNA_1857|Chr13:95120752_95128782_-(Akt3);circRNA_1858|Chr13:95167819_95196402_-(Akt3);circRNA_1859|Chr13:95167819_95208329_-(Akt3);circRNA_1861|Chr13:95193009_95208329_-(Akt3);circRNA_2141|Chr14:87328008_87331877_+(Adcy1);circRNA_2142|Chr14:87328008_87357732_+(Adcy1);circRNA_2143|Chr14:87328008_87377952_+(Adcy1);circRNA_2144|Chr14:87331763_87357732_+(Adcy1);circRNA_2145|Chr14:87350088_8735773…	rno05142
rno05143	African trypanosomiasis	Human Diseases	Infectious disease: parasitic	2	340	17	2681	0.65494	0.857396	0.927682	circRNA_0869|Chr10:15577563_15603016_-(Hba-a1);circRNA_1236|Chr10:96264760_96266403_-(Prkca);	rno05143
rno05144	Malaria	Human Diseases	Infectious disease: parasitic	1	340	6	2681	0.557132	0.799765	1.31422	circRNA_0869|Chr10:15577563_15603016_-(Hba-a1);	rno05144
rno05145	Toxoplasmosis	Human Diseases	Infectious disease: parasitic	7	340	34	2681	0.130089	0.340958	1.62344	circRNA_1857|Chr13:95120752_95128782_-(Akt3);circRNA_1858|Chr13:95167819_95196402_-(Akt3);circRNA_1859|Chr13:95167819_95208329_-(Akt3);circRNA_1861|Chr13:95193009_95208329_-(Akt3);circRNA_3817|Chr2:240822115_240867796_-(Nfkb1);circRNA_6215|Chr7:130113212_130116591_-(Mapk12);circRNA_6271|Chr8:6014617_6023899_-(Birc2);	rno05145
rno05146	Amoebiasis	Human Diseases	Infectious disease: parasitic	12	340	79	2681	0.295315	0.585749	1.19777	circRNA_1155|Chr10:82756914_82757163_+(Col1a1);circRNA_1236|Chr10:96264760_96266403_-(Prkca);circRNA_2141|Chr14:87328008_87331877_+(Adcy1);circRNA_2142|Chr14:87328008_87357732_+(Adcy1);circRNA_2143|Chr14:87328008_87377952_+(Adcy1);circRNA_2144|Chr14:87331763_87357732_+(Adcy1);circRNA_2145|Chr14:87350088_87357732_+(Adcy1);circRNA_3379|Chr2:31816052_31816763_-(Pik3r1);circRNA_3817|Chr2:240822115_24…	rno05146
rno05152	Tuberculosis	Human Diseases	Infectious disease: bacterial	10	340	81	2681	0.588518	0.823933	0.973493	circRNA_1857|Chr13:95120752_95128782_-(Akt3);circRNA_1858|Chr13:95167819_95196402_-(Akt3);circRNA_1859|Chr13:95167819_95208329_-(Akt3);circRNA_1861|Chr13:95193009_95208329_-(Akt3);circRNA_2337|Chr15:51925689_51954838_-(Ppp3cc);circRNA_3817|Chr2:240822115_240867796_-(Nfkb1);circRNA_4147|Chr3:46525736_46528994_-(Pla2r1);circRNA_6215|Chr7:130113212_130116591_-(Mapk12);circRNA_6642|Chr8:117106575_117…	rno05152
rno05160	Hepatitis C	Human Diseases	Infectious disease: viral	11	340	59	2681	0.118934	0.324366	1.47014	circRNA_1857|Chr13:95120752_95128782_-(Akt3);circRNA_1858|Chr13:95167819_95196402_-(Akt3);circRNA_1859|Chr13:95167819_95208329_-(Akt3);circRNA_1861|Chr13:95193009_95208329_-(Akt3);circRNA_2158|Chr14:100058305_100066787_+(Egfr);circRNA_3379|Chr2:31816052_31816763_-(Pik3r1);circRNA_3817|Chr2:240822115_240867796_-(Nfkb1);circRNA_5722|Chr6:91933750_91961861_-(Sos2);circRNA_5724|Chr6:91938501_91961861…	rno05160
rno05161	Hepatitis B	Human Diseases	Infectious disease: viral	12	340	79	2681	0.295315	0.585749	1.19777	circRNA_0645|Chr1:251455609_251463748_+(Pten);circRNA_1236|Chr10:96264760_96266403_-(Prkca);circRNA_1857|Chr13:95120752_95128782_-(Akt3);circRNA_1858|Chr13:95167819_95196402_-(Akt3);circRNA_1859|Chr13:95167819_95208329_-(Akt3);circRNA_1861|Chr13:95193009_95208329_-(Akt3);circRNA_2352|Chr15:55151603_55154467_-(Rb1);circRNA_3031|Chr18:69634006_69647714_-(Smad4);circRNA_3037|Chr18:69654505_69657373_…	rno05161
rno05162	Measles	Human Diseases	Infectious disease: viral	8	340	28	2681	0.0192756	0.112833	2.25294	circRNA_1368|Chr11:51049296_51068978_-(Cblb);circRNA_1369|Chr11:51057506_51068978_-(Cblb);circRNA_1857|Chr13:95120752_95128782_-(Akt3);circRNA_1858|Chr13:95167819_95196402_-(Akt3);circRNA_1859|Chr13:95167819_95208329_-(Akt3);circRNA_1861|Chr13:95193009_95208329_-(Akt3);circRNA_3379|Chr2:31816052_31816763_-(Pik3r1);circRNA_3817|Chr2:240822115_240867796_-(Nfkb1);	rno05162
rno05164	Influenza A	Human Diseases	Infectious disease: viral	8	340	67	2681	0.629669	0.841611	0.941528	circRNA_1236|Chr10:96264760_96266403_-(Prkca);circRNA_1857|Chr13:95120752_95128782_-(Akt3);circRNA_1858|Chr13:95167819_95196402_-(Akt3);circRNA_1859|Chr13:95167819_95208329_-(Akt3);circRNA_1861|Chr13:95193009_95208329_-(Akt3);circRNA_3379|Chr2:31816052_31816763_-(Pik3r1);circRNA_3817|Chr2:240822115_240867796_-(Nfkb1);circRNA_6215|Chr7:130113212_130116591_-(Mapk12);	rno05164
rno05165	Human papillomavirus infection	Human Diseases	Infectious disease: viral	23	340	188	2681	0.611214	0.831732	0.96469	circRNA_0216|Chr1:116643750_116660509_+(Ube3a);circRNA_0645|Chr1:251455609_251463748_+(Pten);circRNA_1155|Chr10:82756914_82757163_+(Col1a1);circRNA_1857|Chr13:95120752_95128782_-(Akt3);circRNA_1858|Chr13:95167819_95196402_-(Akt3);circRNA_1859|Chr13:95167819_95208329_-(Akt3);circRNA_1861|Chr13:95193009_95208329_-(Akt3);circRNA_2158|Chr14:100058305_100066787_+(Egfr);circRNA_2352|Chr15:55151603_5515…	rno05165
rno05166	HTLV-I infection	Human Diseases	Infectious disease: viral	25	340	143	2681	0.0544367	0.210723	1.37855	circRNA_1212|Chr10:94292693_94314584_+(Map3k3);circRNA_1397|Chr11:68722906_68725314_-(Adcy5);circRNA_1398|Chr11:68722906_68730129_-(Adcy5);circRNA_1399|Chr11:68745884_68750272_-(Adcy5);circRNA_1643|Chr12:39627016_39635912_-(Anapc7);circRNA_1857|Chr13:95120752_95128782_-(Akt3);circRNA_1858|Chr13:95167819_95196402_-(Akt3);circRNA_1859|Chr13:95167819_95208329_-(Akt3);circRNA_1861|Chr13:95193009_9520…	rno05166
rno05167	Kaposi's sarcoma-associated herpesvirus infection	Human Diseases	Infectious disease: viral	11	340	98	2681	0.716476	0.895595	0.885084	circRNA_1857|Chr13:95120752_95128782_-(Akt3);circRNA_1858|Chr13:95167819_95196402_-(Akt3);circRNA_1859|Chr13:95167819_95208329_-(Akt3);circRNA_1861|Chr13:95193009_95208329_-(Akt3);circRNA_2337|Chr15:51925689_51954838_-(Ppp3cc);circRNA_2352|Chr15:55151603_55154467_-(Rb1);circRNA_3204|Chr19:38057557_38091369_+(Nfatc3);circRNA_3379|Chr2:31816052_31816763_-(Pik3r1);circRNA_3817|Chr2:240822115_2408677…	rno05167
rno05168	Herpes simplex infection	Human Diseases	Infectious disease: viral	8	340	64	2681	0.575434	0.812377	0.985662	circRNA_1119|Chr10:75337353_75340473_+(Srsf1);circRNA_1593|Chr12:25431710_25435591_+(Gtf2i);circRNA_1594|Chr12:25442325_25447480_+(Gtf2i);circRNA_1596|Chr12:25442325_25454041_+(Gtf2i);circRNA_2866|Chr18:6218154_6233603_+(Taf4b);circRNA_2869|Chr18:6249297_6279570_+(Taf4b);circRNA_3817|Chr2:240822115_240867796_-(Nfkb1);circRNA_3872|Chr20:3232306_3273815_+(RT1-T24-3);	rno05168
rno05169	Epstein-Barr virus infection	Human Diseases	Infectious disease: viral	9	340	93	2681	0.853282	0.930854	0.763093	circRNA_1857|Chr13:95120752_95128782_-(Akt3);circRNA_1858|Chr13:95167819_95196402_-(Akt3);circRNA_1859|Chr13:95167819_95208329_-(Akt3);circRNA_1861|Chr13:95193009_95208329_-(Akt3);circRNA_2352|Chr15:55151603_55154467_-(Rb1);circRNA_3379|Chr2:31816052_31816763_-(Pik3r1);circRNA_3817|Chr2:240822115_240867796_-(Nfkb1);circRNA_3872|Chr20:3232306_3273815_+(RT1-T24-3);circRNA_6215|Chr7:130113212_130116…	rno05169
rno05200	Pathways in cancer	Human Diseases	Cancer: overview	42	340	258	2681	0.0451448	0.180579	1.28365	circRNA_0451|Chr1:200671013_200672411_-(Fgfr2);circRNA_0645|Chr1:251455609_251463748_+(Pten);circRNA_1236|Chr10:96264760_96266403_-(Prkca);circRNA_1397|Chr11:68722906_68725314_-(Adcy5);circRNA_1398|Chr11:68722906_68730129_-(Adcy5);circRNA_1399|Chr11:68745884_68750272_-(Adcy5);circRNA_1857|Chr13:95120752_95128782_-(Akt3);circRNA_1858|Chr13:95167819_95196402_-(Akt3);circRNA_1859|Chr13:95167819_9520…	rno05200
rno05202	Transcriptional misregulation in cancers	Human Diseases	Cancer: overview	15	340	93	2681	0.192478	0.444179	1.27182	circRNA_1969|Chr14:14174786_14192047_-(Bmp2k);circRNA_3817|Chr2:240822115_240867796_-(Nfkb1);circRNA_4845|Chr4:147295666_147361944_+(Pparg);circRNA_4977|Chr5:4408215_4469629_+(Eya1);circRNA_4979|Chr5:4424816_4449569_+(Eya1);circRNA_4980|Chr5:4424816_4469629_+(Eya1);circRNA_5747|Chr6:100396828_100397255_+(Fut8);circRNA_6150|Chr7:114466514_114468769_-(Ptk2);circRNA_6155|Chr7:114555889_114562987_-(P…	rno05202
rno05203	Viral carcinogenesis	Human Diseases	Cancer: overview	9	340	84	2681	0.757296	0.910862	0.844853	circRNA_0216|Chr1:116643750_116660509_+(Ube3a);circRNA_2352|Chr15:55151603_55154467_-(Rb1);circRNA_3379|Chr2:31816052_31816763_-(Pik3r1);circRNA_3817|Chr2:240822115_240867796_-(Nfkb1);circRNA_3872|Chr20:3232306_3273815_+(RT1-T24-3);circRNA_5406|Chr5:155702728_155709264_-(Cdc42);circRNA_5754|Chr6:103389817_103393554_-(Actn1);circRNA_6642|Chr8:117106575_117109692_+(Rhoa);circRNA_6643|Chr8:117109572…	rno05203
rno05205	Proteoglycans in cancer	Human Diseases	Cancer: overview	27	340	166	2681	0.0974454	0.300635	1.28255	circRNA_0271|Chr1:142556681_142565170_-(Iqgap1);circRNA_0725|Chr1:262151915_262176067_-(Hpse2);circRNA_0726|Chr1:262786087_262811422_-(Hpse2);circRNA_0758|Chr1:274628955_274647456_+(Pdcd4);circRNA_1236|Chr10:96264760_96266403_-(Prkca);circRNA_1857|Chr13:95120752_95128782_-(Akt3);circRNA_1858|Chr13:95167819_95196402_-(Akt3);circRNA_1859|Chr13:95167819_95208329_-(Akt3);circRNA_1861|Chr13:95193009_9…	rno05205
rno05206	MicroRNAs in cancer	Human Diseases	Cancer: overview	17	340	82	2681	0.0251117	0.135194	1.63476	circRNA_0645|Chr1:251455609_251463748_+(Pten);circRNA_0758|Chr1:274628955_274647456_+(Pdcd4);circRNA_1236|Chr10:96264760_96266403_-(Prkca);circRNA_2158|Chr14:100058305_100066787_+(Egfr);circRNA_3701|Chr2:200243345_200253557_+(Notch2);circRNA_3817|Chr2:240822115_240867796_-(Nfkb1);circRNA_5043|Chr5:31700609_31739695_+(Mmp16);circRNA_5595|Chr6:28272106_28272697_+(Dnmt3a);circRNA_5722|Chr6:91933750_…	rno05206
rno05210	Colorectal cancer	Human Diseases	Cancer: specific types	14	340	61	2681	0.0175909	0.105545	1.80974	circRNA_1857|Chr13:95120752_95128782_-(Akt3);circRNA_1858|Chr13:95167819_95196402_-(Akt3);circRNA_1859|Chr13:95167819_95208329_-(Akt3);circRNA_1861|Chr13:95193009_95208329_-(Akt3);circRNA_2158|Chr14:100058305_100066787_+(Egfr);circRNA_2441|Chr16:2578902_2581762_-(Appl1);circRNA_3031|Chr18:69634006_69647714_-(Smad4);circRNA_3037|Chr18:69654505_69657373_-(Smad4);circRNA_3059|Chr18:72593000_72611211…	rno05210
rno05211	Renal cell carcinoma	Human Diseases	Cancer: specific types	10	340	52	2681	0.113941	0.321248	1.5164	circRNA_1857|Chr13:95120752_95128782_-(Akt3);circRNA_1858|Chr13:95167819_95196402_-(Akt3);circRNA_1859|Chr13:95167819_95208329_-(Akt3);circRNA_1861|Chr13:95193009_95208329_-(Akt3);circRNA_3149|Chr19:30869716_30870010_+(Gab1);circRNA_3150|Chr19:30869716_30883569_+(Gab1);circRNA_3379|Chr2:31816052_31816763_-(Pik3r1);circRNA_5406|Chr5:155702728_155709264_-(Cdc42);circRNA_5722|Chr6:91933750_91961861_…	rno05211
rno05212	Pancreatic cancer	Human Diseases	Cancer: specific types	14	340	61	2681	0.0175909	0.105545	1.80974	circRNA_1857|Chr13:95120752_95128782_-(Akt3);circRNA_1858|Chr13:95167819_95196402_-(Akt3);circRNA_1859|Chr13:95167819_95208329_-(Akt3);circRNA_1861|Chr13:95193009_95208329_-(Akt3);circRNA_2158|Chr14:100058305_100066787_+(Egfr);circRNA_2352|Chr15:55151603_55154467_-(Rb1);circRNA_3031|Chr18:69634006_69647714_-(Smad4);circRNA_3037|Chr18:69654505_69657373_-(Smad4);circRNA_3059|Chr18:72593000_72611211…	rno05212
rno05213	Endometrial cancer	Human Diseases	Cancer: specific types	9	340	43	2681	0.0855388	0.281223	1.65041	circRNA_0645|Chr1:251455609_251463748_+(Pten);circRNA_1857|Chr13:95120752_95128782_-(Akt3);circRNA_1858|Chr13:95167819_95196402_-(Akt3);circRNA_1859|Chr13:95167819_95208329_-(Akt3);circRNA_1861|Chr13:95193009_95208329_-(Akt3);circRNA_2158|Chr14:100058305_100066787_+(Egfr);circRNA_3379|Chr2:31816052_31816763_-(Pik3r1);circRNA_5722|Chr6:91933750_91961861_-(Sos2);circRNA_5724|Chr6:91938501_91961861_…	rno05213
rno05214	Glioma	Human Diseases	Cancer: specific types	11	340	47	2681	0.0292907	0.143648	1.84549	circRNA_0645|Chr1:251455609_251463748_+(Pten);circRNA_1236|Chr10:96264760_96266403_-(Prkca);circRNA_1857|Chr13:95120752_95128782_-(Akt3);circRNA_1858|Chr13:95167819_95196402_-(Akt3);circRNA_1859|Chr13:95167819_95208329_-(Akt3);circRNA_1861|Chr13:95193009_95208329_-(Akt3);circRNA_2158|Chr14:100058305_100066787_+(Egfr);circRNA_2352|Chr15:55151603_55154467_-(Rb1);circRNA_3379|Chr2:31816052_31816763_…	rno05214
rno05215	Prostate cancer	Human Diseases	Cancer: specific types	12	340	62	2681	0.0851881	0.281223	1.52619	circRNA_0451|Chr1:200671013_200672411_-(Fgfr2);circRNA_0645|Chr1:251455609_251463748_+(Pten);circRNA_1857|Chr13:95120752_95128782_-(Akt3);circRNA_1858|Chr13:95167819_95196402_-(Akt3);circRNA_1859|Chr13:95167819_95208329_-(Akt3);circRNA_1861|Chr13:95193009_95208329_-(Akt3);circRNA_2158|Chr14:100058305_100066787_+(Egfr);circRNA_2352|Chr15:55151603_55154467_-(Rb1);circRNA_3379|Chr2:31816052_31816763…	rno05215
rno05216	Thyroid cancer	Human Diseases	Cancer: specific types	1	340	20	2681	0.934295	0.974917	0.394265	circRNA_4845|Chr4:147295666_147361944_+(Pparg);	rno05216
rno05217	Basal cell carcinoma	Human Diseases	Cancer: specific types	2	340	9	2681	0.319218	0.608034	1.75229	circRNA_2605|Chr17:1057871_1065593_-(Ptch1);circRNA_2720|Chr17:52477332_52555114_-(Gli3);	rno05217
rno05218	Melanoma	Human Diseases	Cancer: specific types	8	340	38	2681	0.0990758	0.30099	1.66006	circRNA_0645|Chr1:251455609_251463748_+(Pten);circRNA_1857|Chr13:95120752_95128782_-(Akt3);circRNA_1858|Chr13:95167819_95196402_-(Akt3);circRNA_1859|Chr13:95167819_95208329_-(Akt3);circRNA_1861|Chr13:95193009_95208329_-(Akt3);circRNA_2158|Chr14:100058305_100066787_+(Egfr);circRNA_2352|Chr15:55151603_55154467_-(Rb1);circRNA_3379|Chr2:31816052_31816763_-(Pik3r1);	rno05218
rno05219	Bladder cancer	Human Diseases	Cancer: specific types	5	340	27	2681	0.251741	0.534672	1.46024	circRNA_2158|Chr14:100058305_100066787_+(Egfr);circRNA_2352|Chr15:55151603_55154467_-(Rb1);circRNA_5802|Chr6:124596541_124629605_-(Rps6ka5);circRNA_5807|Chr6:124651885_124652103_-(Rps6ka5);circRNA_5808|Chr6:124651885_124677509_-(Rps6ka5);	rno05219
rno05220	Chronic myeloid leukemia	Human Diseases	Cancer: specific types	11	340	51	2681	0.0504777	0.198601	1.70075	circRNA_1857|Chr13:95120752_95128782_-(Akt3);circRNA_1858|Chr13:95167819_95196402_-(Akt3);circRNA_1859|Chr13:95167819_95208329_-(Akt3);circRNA_1861|Chr13:95193009_95208329_-(Akt3);circRNA_2352|Chr15:55151603_55154467_-(Rb1);circRNA_3031|Chr18:69634006_69647714_-(Smad4);circRNA_3037|Chr18:69654505_69657373_-(Smad4);circRNA_3379|Chr2:31816052_31816763_-(Pik3r1);circRNA_3817|Chr2:240822115_240867796…	rno05220
rno05221	Acute myeloid leukemia	Human Diseases	Cancer: specific types	8	340	36	2681	0.0765065	0.26611	1.75229	circRNA_1857|Chr13:95120752_95128782_-(Akt3);circRNA_1858|Chr13:95167819_95196402_-(Akt3);circRNA_1859|Chr13:95167819_95208329_-(Akt3);circRNA_1861|Chr13:95193009_95208329_-(Akt3);circRNA_3379|Chr2:31816052_31816763_-(Pik3r1);circRNA_3817|Chr2:240822115_240867796_-(Nfkb1);circRNA_5722|Chr6:91933750_91961861_-(Sos2);circRNA_5724|Chr6:91938501_91961861_-(Sos2);	rno05221
rno05222	Small cell lung cancer	Human Diseases	Cancer: specific types	11	340	62	2681	0.153877	0.376841	1.399	circRNA_0645|Chr1:251455609_251463748_+(Pten);circRNA_1857|Chr13:95120752_95128782_-(Akt3);circRNA_1858|Chr13:95167819_95196402_-(Akt3);circRNA_1859|Chr13:95167819_95208329_-(Akt3);circRNA_1861|Chr13:95193009_95208329_-(Akt3);circRNA_2352|Chr15:55151603_55154467_-(Rb1);circRNA_3379|Chr2:31816052_31816763_-(Pik3r1);circRNA_3817|Chr2:240822115_240867796_-(Nfkb1);circRNA_6150|Chr7:114466514_11446876…	rno05222
rno05223	Non-small cell lung cancer	Human Diseases	Cancer: specific types	11	340	47	2681	0.0292907	0.143648	1.84549	circRNA_1236|Chr10:96264760_96266403_-(Prkca);circRNA_1857|Chr13:95120752_95128782_-(Akt3);circRNA_1858|Chr13:95167819_95196402_-(Akt3);circRNA_1859|Chr13:95167819_95208329_-(Akt3);circRNA_1861|Chr13:95193009_95208329_-(Akt3);circRNA_2158|Chr14:100058305_100066787_+(Egfr);circRNA_2352|Chr15:55151603_55154467_-(Rb1);circRNA_3379|Chr2:31816052_31816763_-(Pik3r1);circRNA_5508|Chr6:6627343_6668794_+(…	rno05223
rno05224	Breast cancer	Human Diseases	Cancer: specific types	13	340	57	2681	0.0228871	0.130783	1.7984	circRNA_0645|Chr1:251455609_251463748_+(Pten);circRNA_1857|Chr13:95120752_95128782_-(Akt3);circRNA_1858|Chr13:95167819_95196402_-(Akt3);circRNA_1859|Chr13:95167819_95208329_-(Akt3);circRNA_1861|Chr13:95193009_95208329_-(Akt3);circRNA_2158|Chr14:100058305_100066787_+(Egfr);circRNA_2352|Chr15:55151603_55154467_-(Rb1);circRNA_3379|Chr2:31816052_31816763_-(Pik3r1);circRNA_3701|Chr2:200243345_20025355…	rno05224
rno05225	Hepatocellular carcinoma	Human Diseases	Cancer: specific types	18	340	102	2681	0.087037	0.282282	1.39152	circRNA_0645|Chr1:251455609_251463748_+(Pten);circRNA_1236|Chr10:96264760_96266403_-(Prkca);circRNA_1857|Chr13:95120752_95128782_-(Akt3);circRNA_1858|Chr13:95167819_95196402_-(Akt3);circRNA_1859|Chr13:95167819_95208329_-(Akt3);circRNA_1861|Chr13:95193009_95208329_-(Akt3);circRNA_2158|Chr14:100058305_100066787_+(Egfr);circRNA_2352|Chr15:55151603_55154467_-(Rb1);circRNA_3031|Chr18:69634006_69647714…	rno05225
rno05226	Gastric cancer	Human Diseases	Cancer: specific types	17	340	76	2681	0.0121174	0.0946233	1.76382	circRNA_0451|Chr1:200671013_200672411_-(Fgfr2);circRNA_1857|Chr13:95120752_95128782_-(Akt3);circRNA_1858|Chr13:95167819_95196402_-(Akt3);circRNA_1859|Chr13:95167819_95208329_-(Akt3);circRNA_1861|Chr13:95193009_95208329_-(Akt3);circRNA_2158|Chr14:100058305_100066787_+(Egfr);circRNA_2352|Chr15:55151603_55154467_-(Rb1);circRNA_3031|Chr18:69634006_69647714_-(Smad4);circRNA_3037|Chr18:69654505_6965737…	rno05226
rno05230	Central carbon metabolism in cancer	Human Diseases	Cancer: overview	10	340	34	2681	0.00741874	0.0741874	2.3192	circRNA_0259|Chr1:139943398_139956356_-(Ntrk3);circRNA_0451|Chr1:200671013_200672411_-(Fgfr2);circRNA_0645|Chr1:251455609_251463748_+(Pten);circRNA_1857|Chr13:95120752_95128782_-(Akt3);circRNA_1858|Chr13:95167819_95196402_-(Akt3);circRNA_1859|Chr13:95167819_95208329_-(Akt3);circRNA_1861|Chr13:95193009_95208329_-(Akt3);circRNA_2158|Chr14:100058305_100066787_+(Egfr);circRNA_3379|Chr2:31816052_31816…	rno05230
rno05231	Choline metabolism in cancer	Human Diseases	Cancer: overview	15	340	61	2681	0.00740733	0.0741874	1.93901	circRNA_1236|Chr10:96264760_96266403_-(Prkca);circRNA_1857|Chr13:95120752_95128782_-(Akt3);circRNA_1858|Chr13:95167819_95196402_-(Akt3);circRNA_1859|Chr13:95167819_95208329_-(Akt3);circRNA_1861|Chr13:95193009_95208329_-(Akt3);circRNA_2158|Chr14:100058305_100066787_+(Egfr);circRNA_2364|Chr15:60816746_60821766_-(Dgkh);circRNA_3379|Chr2:31816052_31816763_-(Pik3r1);circRNA_3512|Chr2:113739689_1137451…	rno05231
rno05320	Autoimmune thyroid disease	Human Diseases	Immune disease	1	340	11	2681	0.775688	0.910862	0.716845	circRNA_3872|Chr20:3232306_3273815_+(RT1-T24-3);	rno05320
rno05321	Inflammatiory bowel disease (IBD)	Human Diseases	Immune disease	2	340	14	2681	0.546208	0.799765	1.12647	circRNA_3059|Chr18:72593000_72611211_+(Smad2);circRNA_3817|Chr2:240822115_240867796_-(Nfkb1);	rno05321
rno05322	Systemic lupus erythematosus	Human Diseases	Immune disease	2	340	10	2681	0.368225	0.649809	1.57706	circRNA_0839|Chr10:5930383_5930975_+(Grin2a);circRNA_5754|Chr6:103389817_103393554_-(Actn1);	rno05322
rno05323	Rheumatoid arthritis	Human Diseases	Immune disease	1	340	17	2681	0.901016	0.952621	0.463841	circRNA_0878|Chr10:16769713_16774652_-(Atp6v0e1);	rno05323
rno05330	Allograft rejection	Human Diseases	Immune disease	1	340	11	2681	0.775688	0.910862	0.716845	circRNA_3872|Chr20:3232306_3273815_+(RT1-T24-3);	rno05330
rno05332	Graft-versus-host disease	Human Diseases	Immune disease	1	340	11	2681	0.775688	0.910862	0.716845	circRNA_3872|Chr20:3232306_3273815_+(RT1-T24-3);	rno05332
rno05410	Hypertrophic cardiomyopathy (HCM)	Human Diseases	Cardiovascular disease	8	340	60	2681	0.498121	0.767118	1.05137	circRNA_1740|Chr13:52671461_52673721_+(Tnnt2);circRNA_4864|Chr4:151118221_151124504_-(Cacna1c);circRNA_5502|Chr6:4259110_4315062_-(Slc8a1);circRNA_5503|Chr6:4278307_4315062_-(Slc8a1);circRNA_5504|Chr6:4298605_4315062_-(Slc8a1);circRNA_6491|Chr8:72823430_72828397_-(Tpm1);circRNA_6680|Chr8:127289436_127301219_+(Itga9);circRNA_6952|Chr9:82557123_82558587_+(Des);	rno05410
rno05412	Arrhythmogenic right ventricular cardiomyopathy (ARVC)	Human Diseases	Cardiovascular disease	6	340	59	2681	0.778028	0.910862	0.801894	circRNA_4864|Chr4:151118221_151124504_-(Cacna1c);circRNA_5502|Chr6:4259110_4315062_-(Slc8a1);circRNA_5503|Chr6:4278307_4315062_-(Slc8a1);circRNA_5504|Chr6:4298605_4315062_-(Slc8a1);circRNA_6680|Chr8:127289436_127301219_+(Itga9);circRNA_6952|Chr9:82557123_82558587_+(Des);	rno05412
rno05414	Dilated cardiomyopathy (DCM)	Human Diseases	Cardiovascular disease	16	340	69	2681	0.010417	0.0916426	1.82847	circRNA_1397|Chr11:68722906_68725314_-(Adcy5);circRNA_1398|Chr11:68722906_68730129_-(Adcy5);circRNA_1399|Chr11:68745884_68750272_-(Adcy5);circRNA_1740|Chr13:52671461_52673721_+(Tnnt2);circRNA_2141|Chr14:87328008_87331877_+(Adcy1);circRNA_2142|Chr14:87328008_87357732_+(Adcy1);circRNA_2143|Chr14:87328008_87377952_+(Adcy1);circRNA_2144|Chr14:87331763_87357732_+(Adcy1);circRNA_2145|Chr14:87350088_873…	rno05414
rno05416	Viral myocarditis	Human Diseases	Cardiovascular disease	1	340	22	2681	0.950016	0.978557	0.358422	circRNA_3872|Chr20:3232306_3273815_+(RT1-T24-3);	rno05416
rno05418	Fluid shear stress and atherosclerosis	Human Diseases	Cardiovascular disease	13	340	81	2681	0.219818	0.479603	1.26554	circRNA_1857|Chr13:95120752_95128782_-(Akt3);circRNA_1858|Chr13:95167819_95196402_-(Akt3);circRNA_1859|Chr13:95167819_95208329_-(Akt3);circRNA_1861|Chr13:95193009_95208329_-(Akt3);circRNA_3379|Chr2:31816052_31816763_-(Pik3r1);circRNA_3817|Chr2:240822115_240867796_-(Nfkb1);circRNA_4137|Chr3:44500847_44522988_-(Acvr1);circRNA_6150|Chr7:114466514_114468769_-(Ptk2);circRNA_6155|Chr7:114555889_1145629…	rno05418

## Sheet: down-regulated(SSCI–3 vs. sham)
id	Term	Classification_level1	Classification_level2	ListHits	ListTotal	PopHits	PopTotal	p-value	q-value	Enrichment_score	Gene	hyperlink_only_excel
rno00020	Citrate cycle (TCA cycle)	Metabolism	Carbohydrate metabolism	1	228	16	2681	0.759786	0.85701	0.734923	circRNA_0267|Chr1:141877382_141880461_-(Idh2);	rno00020
rno00062	Fatty acid elongation	Metabolism	Lipid metabolism	1	228	9	2681	0.551189	0.749617	1.30653	circRNA_5578|Chr6:27575763_27582987_-(Hadhb);	rno00062
rno00071	Fatty acid degradation	Metabolism	Lipid metabolism	2	228	13	2681	0.304561	0.570752	1.80904	circRNA_5578|Chr6:27575763_27582987_-(Hadhb);circRNA_6373|Chr8:58182482_58182849_-(Acat1);	rno00071
rno00130	Ubiquinone and other terpenoid-quinone biosynthesis	Metabolism	Metabolism of cofactors and vitamins	1	228	5	2681	0.359008	0.619158	2.35175	circRNA_1663|Chr12:47088804_47092139_-(Coq5);	rno00130
rno00230	Purine metabolism	Metabolism	Nucleotide metabolism	9	228	57	2681	0.0484918	0.279522	1.85665	circRNA_1397|Chr11:68722906_68725314_-(Adcy5);circRNA_1399|Chr11:68745884_68750272_-(Adcy5);circRNA_2143|Chr14:87328008_87377952_+(Adcy1);circRNA_2144|Chr14:87331763_87357732_+(Adcy1);circRNA_2145|Chr14:87350088_87357732_+(Adcy1);circRNA_3781|Chr2:226925637_226926225_+(Pde5a);circRNA_3782|Chr2:226925637_226942478_+(Pde5a);circRNA_4774|Chr4:115191293_115197150_-(Dguok);circRNA_6793|Chr9:38582634_3…	rno00230
rno00240	Pyrimidine metabolism	Metabolism	Nucleotide metabolism	1	228	19	2681	0.816335	0.891228	0.618883	circRNA_6793|Chr9:38582634_38584696_+(Prim2);	rno00240
rno00270	Cysteine and methionine metabolism	Metabolism	Amino acid metabolism	1	228	8	2681	0.509337	0.715725	1.46985	circRNA_5595|Chr6:28272106_28272697_+(Dnmt3a);	rno00270
rno00280	Valine, leucine and isoleucine degradation	Metabolism	Amino acid metabolism	5	228	35	2681	0.171712	0.444211	1.67982	circRNA_4726|Chr4:82682367_82685493_-(Hibadh);circRNA_5578|Chr6:27575763_27582987_-(Hadhb);circRNA_6373|Chr8:58182482_58182849_-(Acat1);circRNA_6838|Chr9:53459782_53462727_-(Hibch);circRNA_6841|Chr9:53492939_53508890_-(Hibch);	rno00280
rno00310	Lysine degradation	Metabolism	Amino acid metabolism	11	228	83	2681	0.0898316	0.362371	1.55839	circRNA_2975|Chr18:48443339_48443646_+(Prdm6);circRNA_2978|Chr18:48443339_48521166_+(Prdm6);circRNA_2979|Chr18:48443339_48531023_+(Prdm6);circRNA_3651|Chr2:188269009_188330330_+(Ash1l);circRNA_3655|Chr2:188285366_188285503_-(Ash1l);circRNA_3659|Chr2:188298849_188330330_+(Ash1l);circRNA_3661|Chr2:188301023_188330330_+(Ash1l);circRNA_3663|Chr2:188308301_188309036_+(Ash1l);circRNA_3665|Chr2:18833723…	rno00310
rno00380	Tryptophan metabolism	Metabolism	Amino acid metabolism	1	228	7	2681	0.4636	0.679508	1.67982	circRNA_6373|Chr8:58182482_58182849_-(Acat1);	rno00380
rno00410	beta-Alanine metabolism	Metabolism	Metabolism of other amino acids	2	228	11	2681	0.239066	0.527427	2.13796	circRNA_6838|Chr9:53459782_53462727_-(Hibch);circRNA_6841|Chr9:53492939_53508890_-(Hibch);	rno00410
rno00480	Glutathione metabolism	Metabolism	Metabolism of other amino acids	1	228	15	2681	0.737322	0.847742	0.783918	circRNA_0267|Chr1:141877382_141880461_-(Idh2);	rno00480
rno00510	N-Glycan biosynthesis	Metabolism	Glycan biosynthesis and metabolism	2	228	21	2681	0.544287	0.748787	1.11988	circRNA_0269|Chr1:142160925_142161359_-(Man2a2);circRNA_5747|Chr6:100396828_100397255_+(Fut8);	rno00510
rno00520	Amino sugar and nucleotide sugar metabolism	Metabolism	Carbohydrate metabolism	1	228	22	2681	0.859616	0.901448	0.53449	circRNA_6731|Chr9:11187797_11219449_-(Uxs1);	rno00520
rno00531	Glycosaminoglycan degradation	Metabolism	Glycan biosynthesis and metabolism	2	228	5	2681	0.060628	0.300614	4.70351	circRNA_0725|Chr1:262151915_262176067_-(Hpse2);circRNA_0726|Chr1:262786087_262811422_-(Hpse2);	rno00531
rno00561	Glycerolipid metabolism	Metabolism	Lipid metabolism	4	228	24	2681	0.141342	0.399217	1.9598	circRNA_0110|Chr1:48792572_48797638_-(Agpat4);circRNA_2364|Chr15:60816746_60821766_-(Dgkh);circRNA_4663|Chr4:64431354_64474930_-(Dgki);circRNA_4664|Chr4:64451679_64474930_-(Dgki);	rno00561
rno00562	Inositol phosphate metabolism	Metabolism	Carbohydrate metabolism	7	228	77	2681	0.485984	0.696772	1.06898	circRNA_0389|Chr1:185252579_185264972_+(Pik3c2a);circRNA_0391|Chr1:185261106_185267832_+(Pik3c2a);circRNA_0394|Chr1:185263914_185297636_+(Pik3c2a);circRNA_0445|Chr1:200102205_200105174_+(Inpp5f);circRNA_2072|Chr14:60573253_60586776_-(Pi4k2b);circRNA_6804|Chr9:43968846_43977575_+(Inpp4a);circRNA_6920|Chr9:71920586_71960153_+(Pikfyve);	rno00562
rno00563	Glycosylphosphatidylinositol(GPI)-anchor biosynthesis	Metabolism	Glycan biosynthesis and metabolism	2	228	7	2681	0.113746	0.38129	3.35965	circRNA_4431|Chr3:150814608_150833140_-(Pigu);circRNA_5073|Chr5:58467569_58467992_-(Pigo);	rno00563
rno00564	Glycerophospholipid metabolism	Metabolism	Lipid metabolism	6	228	42	2681	0.141518	0.399217	1.67982	circRNA_0110|Chr1:48792572_48797638_-(Agpat4);circRNA_1762|Chr13:67141798_67143114_-(Pla2g4a);circRNA_2364|Chr15:60816746_60821766_-(Dgkh);circRNA_3515|Chr2:113747182_113764892_+(Pld1);circRNA_4663|Chr4:64431354_64474930_-(Dgki);circRNA_4664|Chr4:64451679_64474930_-(Dgki);	rno00564
rno00565	Ether lipid metabolism	Metabolism	Lipid metabolism	2	228	28	2681	0.702441	0.827543	0.839912	circRNA_1762|Chr13:67141798_67143114_-(Pla2g4a);circRNA_3515|Chr2:113747182_113764892_+(Pld1);	rno00565
rno00590	Arachidonic acid metabolism	Metabolism	Lipid metabolism	1	228	10	2681	0.589486	0.779431	1.17588	circRNA_1762|Chr13:67141798_67143114_-(Pla2g4a);	rno00590
rno00591	Linoleic acid metabolism	Metabolism	Lipid metabolism	1	228	6	2681	0.413621	0.651933	1.9598	circRNA_1762|Chr13:67141798_67143114_-(Pla2g4a);	rno00591
rno00592	alpha-Linolenic acid metabolism	Metabolism	Lipid metabolism	1	228	10	2681	0.589486	0.779431	1.17588	circRNA_1762|Chr13:67141798_67143114_-(Pla2g4a);	rno00592
rno00600	Sphingolipid metabolism	Metabolism	Lipid metabolism	1	228	26	2681	0.90194	0.926613	0.45226	circRNA_1498|Chr12:4448685_4450137_-(Cers4);	rno00600
rno00620	Pyruvate metabolism	Metabolism	Carbohydrate metabolism	1	228	12	2681	0.656591	0.796367	0.979898	circRNA_6373|Chr8:58182482_58182849_-(Acat1);	rno00620
rno00630	Glyoxylate and dicarboxylate metabolism	Metabolism	Carbohydrate metabolism	1	228	10	2681	0.589486	0.779431	1.17588	circRNA_6373|Chr8:58182482_58182849_-(Acat1);	rno00630
rno00640	Propanoate metabolism	Metabolism	Carbohydrate metabolism	3	228	25	2681	0.358834	0.619158	1.41105	circRNA_6373|Chr8:58182482_58182849_-(Acat1);circRNA_6838|Chr9:53459782_53462727_-(Hibch);circRNA_6841|Chr9:53492939_53508890_-(Hibch);	rno00640
rno00760	Nicotinate and nicotinamide metabolism	Metabolism	Metabolism of cofactors and vitamins	1	228	6	2681	0.413621	0.651933	1.9598	circRNA_3460|Chr2:58477282_58489198_+(Nadk2);	rno00760
rno00770	Pantothenate and CoA biosynthesis	Metabolism	Metabolism of cofactors and vitamins	1	228	12	2681	0.656591	0.796367	0.979898	circRNA_4363|Chr3:123819852_123833222_+(Pank2);	rno00770
rno00830	Retinol metabolism	Metabolism	Metabolism of cofactors and vitamins	1	228	7	2681	0.4636	0.679508	1.67982	circRNA_5440|Chr5:162834556_162835977_+(Dhrs3);	rno00830
rno00900	Terpenoid backbone biosynthesis	Metabolism	Metabolism of terpenoids and polyketides	1	228	7	2681	0.4636	0.679508	1.67982	circRNA_6373|Chr8:58182482_58182849_-(Acat1);	rno00900
rno00970	Aminoacyl-tRNA biosynthesis	Genetic Information Processing	Translation	1	228	16	2681	0.759786	0.85701	0.734923	circRNA_0301|Chr1:161988635_162006381_+(Nars2);	rno00970
rno00983	Drug metabolism - other enzymes	Metabolism	Xenobiotics biodegradation and metabolism	1	228	21	2681	0.846455	0.901448	0.559942	circRNA_3111|Chr19:15151107_15207439_+(Ces1d);	rno00983
rno01521	EGFR tyrosine kinase inhibitor resistance	Human Diseases	Drug resistance: antineoplastic	10	228	65	2681	0.0451276	0.271499	1.80904	circRNA_0419|Chr1:192379875_192409606_+(Prkcb);circRNA_0451|Chr1:200671013_200672411_-(Fgfr2);circRNA_1059|Chr10:66891013_66900528_+(Nf1);circRNA_1236|Chr10:96264760_96266403_-(Prkca);circRNA_1858|Chr13:95167819_95196402_-(Akt3);circRNA_1859|Chr13:95167819_95208329_-(Akt3);circRNA_2158|Chr14:100058305_100066787_+(Egfr);circRNA_3150|Chr19:30869716_30883569_+(Gab1);circRNA_4700|Chr4:67399951_674126…	rno01521
rno01522	Endocrine resistance	Human Diseases	Drug resistance: antineoplastic	14	228	66	2681	0.000971955	0.0578313	2.49428	circRNA_1397|Chr11:68722906_68725314_-(Adcy5);circRNA_1399|Chr11:68745884_68750272_-(Adcy5);circRNA_1858|Chr13:95167819_95196402_-(Akt3);circRNA_1859|Chr13:95167819_95208329_-(Akt3);circRNA_2143|Chr14:87328008_87377952_+(Adcy1);circRNA_2144|Chr14:87331763_87357732_+(Adcy1);circRNA_2145|Chr14:87350088_87357732_+(Adcy1);circRNA_2158|Chr14:100058305_100066787_+(Egfr);circRNA_4700|Chr4:67399951_67412…	rno01522
rno01523	Antifolate resistance	Human Diseases	Drug resistance: antineoplastic	2	228	15	2681	0.368991	0.631085	1.56784	circRNA_2408|Chr15:103872241_103886205_-(Abcc4);circRNA_3818|Chr2:240854068_240861760_-(Nfkb1);	rno01523
rno01524	Platinum drug resistance	Human Diseases	Drug resistance: antineoplastic	6	228	45	2681	0.178802	0.45758	1.56784	circRNA_1858|Chr13:95167819_95196402_-(Akt3);circRNA_1859|Chr13:95167819_95208329_-(Akt3);circRNA_2232|Chr15:10296336_10303515_-(Top2b);circRNA_3313|Chr2:21915465_21921128_-(Msh3);circRNA_6271|Chr8:6014617_6023899_-(Birc2);circRNA_6748|Chr9:17166589_17167490_+(Polh);	rno01524
rno02010	ABC transporters	Environmental Information Processing	Membrane transport	2	228	25	2681	0.64101	0.796367	0.940702	circRNA_2408|Chr15:103872241_103886205_-(Abcc4);circRNA_4940|Chr4:176868013_176879489_-(Abcc9);	rno02010
rno03008	Ribosome biogenesis in eukaryotes	Genetic Information Processing	Translation	1	228	26	2681	0.90194	0.926613	0.45226	circRNA_3600|Chr2:166406958_166423542_+(Nmd3);	rno03008
rno03013	RNA transport	Genetic Information Processing	Translation	6	228	58	2681	0.371226	0.631085	1.21642	circRNA_0305|Chr1:162684057_162691242_+(Clns1a);circRNA_0306|Chr1:162684057_162696070_+(Clns1a);circRNA_3600|Chr2:166406958_166423542_+(Nmd3);circRNA_3969|Chr20:28067776_28072115_+(Ranbp2);circRNA_4063|Chr3:8906803_8907042_+(Nup188);circRNA_7211|ChrX:128202172_128205259_-(Thoc2);	rno03013
rno03015	mRNA surveillance pathway	Genetic Information Processing	Translation	6	228	47	2681	0.205641	0.501545	1.50112	circRNA_0041|Chr1:16859047_16879498_+(Hbs1l);circRNA_0299|Chr1:157470071_157490006_-(Pcf11);circRNA_2905|Chr18:24611733_24620738_+(Wdr33);circRNA_2925|Chr18:27704440_27708817_-(Etf1);circRNA_5562|Chr6:23554728_23563843_-(Ppp1cb);circRNA_6028|Chr7:60390972_60408823_-(Cpsf6);	rno03015
rno03018	RNA degradation	Genetic Information Processing	Folding, sorting and degradation	1	228	53	2681	0.991426	0.991426	0.221864	circRNA_1515|Chr12:9233368_9240810_-(Pan3);	rno03018
rno03022	Basal transcription factors	Genetic Information Processing	Transcription	4	228	21	2681	0.0968266	0.368535	2.23977	circRNA_1593|Chr12:25431710_25435591_+(Gtf2i);circRNA_1594|Chr12:25442325_25447480_+(Gtf2i);circRNA_2866|Chr18:6218154_6233603_+(Taf4b);circRNA_2909|Chr18:25055044_25059278_+(Ercc3);	rno03022
rno03030	DNA replication	Genetic Information Processing	Replication and repair	2	228	6	2681	0.085939	0.360786	3.91959	circRNA_2312|Chr15:45437783_45445017_+(Rnaseh2b);circRNA_6793|Chr9:38582634_38584696_+(Prim2);	rno03030
rno03040	Spliceosome	Genetic Information Processing	Transcription	4	228	30	2681	0.248201	0.527427	1.56784	circRNA_0893|Chr10:29038498_29040713_+(Slu7);circRNA_2638|Chr17:9503324_9503470_-(Ddx46);circRNA_4493|Chr3:177131326_177132323_+(Prpf6);circRNA_7211|ChrX:128202172_128205259_-(Thoc2);	rno03040
rno03050	Proteasome	Genetic Information Processing	Folding, sorting and degradation	1	228	10	2681	0.589486	0.779431	1.17588	circRNA_4483|Chr3:175422379_175423144_-(Psma7);	rno03050
rno03320	PPAR signaling pathway	Organismal Systems	Endocrine system	2	228	54	2681	0.951999	0.960067	0.43551	circRNA_0696|Chr1:259412482_259459540_-(Sorbs1);circRNA_0715|Chr1:259479327_259488326_-(Sorbs1);	rno03320
rno03420	Nucleotide excision repair	Genetic Information Processing	Replication and repair	1	228	10	2681	0.589486	0.779431	1.17588	circRNA_2909|Chr18:25055044_25059278_+(Ercc3);	rno03420
rno03430	Mismatch repair	Genetic Information Processing	Replication and repair	1	228	6	2681	0.413621	0.651933	1.9598	circRNA_3313|Chr2:21915465_21921128_-(Msh3);	rno03430
rno03440	Homologous recombination	Genetic Information Processing	Replication and repair	1	228	21	2681	0.846455	0.901448	0.559942	circRNA_5568|Chr6:25903936_25912817_-(Bre);	rno03440
rno03460	Fanconi anemia pathway	Genetic Information Processing	Replication and repair	1	228	14	2681	0.712766	0.831561	0.839912	circRNA_6748|Chr9:17166589_17167490_+(Polh);	rno03460
rno04010	MAPK signaling pathway	Environmental Information Processing	Signal transduction	23	228	213	2681	0.131944	0.399217	1.26973	circRNA_0419|Chr1:192379875_192409606_+(Prkcb);circRNA_0451|Chr1:200671013_200672411_-(Fgfr2);circRNA_1059|Chr10:66891013_66900528_+(Nf1);circRNA_1212|Chr10:94292693_94314584_+(Map3k3);circRNA_1236|Chr10:96264760_96266403_-(Prkca);circRNA_1652|Chr12:40521512_40523581_+(Mapkapk5);circRNA_1762|Chr13:67141798_67143114_-(Pla2g4a);circRNA_1858|Chr13:95167819_95196402_-(Akt3);circRNA_1859|Chr13:9516781…	rno04010
rno04012	ErbB signaling pathway	Environmental Information Processing	Signal transduction	12	228	71	2681	0.014862	0.136045	1.9874	circRNA_0419|Chr1:192379875_192409606_+(Prkcb);circRNA_1236|Chr10:96264760_96266403_-(Prkca);circRNA_1368|Chr11:51049296_51068978_-(Cblb);circRNA_1858|Chr13:95167819_95196402_-(Akt3);circRNA_1859|Chr13:95167819_95208329_-(Akt3);circRNA_2158|Chr14:100058305_100066787_+(Egfr);circRNA_3150|Chr19:30869716_30883569_+(Gab1);circRNA_4700|Chr4:67399951_67412670_-(Braf);circRNA_5722|Chr6:91933750_91961861…	rno04012
rno04014	Ras signaling pathway	Environmental Information Processing	Signal transduction	14	228	131	2681	0.219065	0.511153	1.25666	circRNA_0419|Chr1:192379875_192409606_+(Prkcb);circRNA_0451|Chr1:200671013_200672411_-(Fgfr2);circRNA_0839|Chr10:5930383_5930975_+(Grin2a);circRNA_1059|Chr10:66891013_66900528_+(Nf1);circRNA_1236|Chr10:96264760_96266403_-(Prkca);circRNA_1762|Chr13:67141798_67143114_-(Pla2g4a);circRNA_1780|Chr13:69936554_69944404_-(Rgl1);circRNA_1858|Chr13:95167819_95196402_-(Akt3);circRNA_1859|Chr13:95167819_9520…	rno04014
rno04015	Rap1 signaling pathway	Environmental Information Processing	Signal transduction	18	228	139	2681	0.0438751	0.271499	1.52272	circRNA_0419|Chr1:192379875_192409606_+(Prkcb);circRNA_0451|Chr1:200671013_200672411_-(Fgfr2);circRNA_0839|Chr10:5930383_5930975_+(Grin2a);circRNA_1236|Chr10:96264760_96266403_-(Prkca);circRNA_1397|Chr11:68722906_68725314_-(Adcy5);circRNA_1399|Chr11:68745884_68750272_-(Adcy5);circRNA_1858|Chr13:95167819_95196402_-(Akt3);circRNA_1859|Chr13:95167819_95208329_-(Akt3);circRNA_2143|Chr14:87328008_8737…	rno04015
rno04020	Calcium signaling pathway	Environmental Information Processing	Signal transduction	19	228	116	2681	0.0034587	0.11934	1.92601	circRNA_0419|Chr1:192379875_192409606_+(Prkcb);circRNA_0839|Chr10:5930383_5930975_+(Grin2a);circRNA_1236|Chr10:96264760_96266403_-(Prkca);circRNA_1725|Chr13:50150091_50150276_-(Atp2b4);circRNA_2143|Chr14:87328008_87377952_+(Adcy1);circRNA_2144|Chr14:87331763_87357732_+(Adcy1);circRNA_2145|Chr14:87350088_87357732_+(Adcy1);circRNA_2158|Chr14:100058305_100066787_+(Egfr);circRNA_2334|Chr15:51896716_5…	rno04020
rno04022	cGMP - PKG signaling pathway	Environmental Information Processing	Signal transduction	22	228	156	2681	0.0108211	0.136045	1.65829	circRNA_1397|Chr11:68722906_68725314_-(Adcy5);circRNA_1399|Chr11:68745884_68750272_-(Adcy5);circRNA_1593|Chr12:25431710_25435591_+(Gtf2i);circRNA_1594|Chr12:25442325_25447480_+(Gtf2i);circRNA_1725|Chr13:50150091_50150276_-(Atp2b4);circRNA_1858|Chr13:95167819_95196402_-(Akt3);circRNA_1859|Chr13:95167819_95208329_-(Akt3);circRNA_2143|Chr14:87328008_87377952_+(Adcy1);circRNA_2144|Chr14:87331763_8735…	rno04022
rno04024	cAMP signaling pathway	Environmental Information Processing	Signal transduction	17	228	130	2681	0.04563	0.271499	1.53769	circRNA_0839|Chr10:5930383_5930975_+(Grin2a);circRNA_1397|Chr11:68722906_68725314_-(Adcy5);circRNA_1399|Chr11:68745884_68750272_-(Adcy5);circRNA_1725|Chr13:50150091_50150276_-(Atp2b4);circRNA_1858|Chr13:95167819_95196402_-(Akt3);circRNA_1859|Chr13:95167819_95208329_-(Akt3);circRNA_2143|Chr14:87328008_87377952_+(Adcy1);circRNA_2144|Chr14:87331763_87357732_+(Adcy1);circRNA_2145|Chr14:87350088_87357…	rno04024
rno04060	Cytokine-cytokine receptor interaction	Environmental Information Processing	Signaling molecules and interaction	2	228	32	2681	0.770546	0.864153	0.734923	circRNA_2158|Chr14:100058305_100066787_+(Egfr);circRNA_5249|Chr5:120609027_120616745_+(Lepr);	rno04060
rno04062	Chemokine signaling pathway	Organismal Systems	Immune system	13	228	98	2681	0.0684112	0.317378	1.55984	circRNA_0419|Chr1:192379875_192409606_+(Prkcb);circRNA_1397|Chr11:68722906_68725314_-(Adcy5);circRNA_1399|Chr11:68745884_68750272_-(Adcy5);circRNA_1858|Chr13:95167819_95196402_-(Akt3);circRNA_1859|Chr13:95167819_95208329_-(Akt3);circRNA_2143|Chr14:87328008_87377952_+(Adcy1);circRNA_2144|Chr14:87331763_87357732_+(Adcy1);circRNA_2145|Chr14:87350088_87357732_+(Adcy1);circRNA_3818|Chr2:240854068_2408…	rno04062
rno04064	NF-kappa B signaling pathway	Environmental Information Processing	Signal transduction	5	228	30	2681	0.105542	0.376949	1.9598	circRNA_0419|Chr1:192379875_192409606_+(Prkcb);circRNA_3818|Chr2:240854068_240861760_-(Nfkb1);circRNA_4873|Chr4:152282030_152355930_-(Erc1);circRNA_5882|Chr6:135672583_135696475_+(Traf3);circRNA_6271|Chr8:6014617_6023899_-(Birc2);	rno04064
rno04066	HIF-1 signaling pathway	Environmental Information Processing	Signal transduction	6	228	51	2681	0.263129	0.539653	1.38338	circRNA_0419|Chr1:192379875_192409606_+(Prkcb);circRNA_1236|Chr10:96264760_96266403_-(Prkca);circRNA_1858|Chr13:95167819_95196402_-(Akt3);circRNA_1859|Chr13:95167819_95208329_-(Akt3);circRNA_2158|Chr14:100058305_100066787_+(Egfr);circRNA_3818|Chr2:240854068_240861760_-(Nfkb1);	rno04066
rno04068	FoxO signaling pathway	Environmental Information Processing	Signal transduction	8	228	87	2681	0.46385	0.679508	1.08127	circRNA_1858|Chr13:95167819_95196402_-(Akt3);circRNA_1859|Chr13:95167819_95208329_-(Akt3);circRNA_2158|Chr14:100058305_100066787_+(Egfr);circRNA_3031|Chr18:69634006_69647714_-(Smad4);circRNA_3059|Chr18:72593000_72611211_+(Smad2);circRNA_4700|Chr4:67399951_67412670_-(Braf);circRNA_5722|Chr6:91933750_91961861_-(Sos2);circRNA_6215|Chr7:130113212_130116591_-(Mapk12);	rno04068
rno04070	Phosphatidylinositol signaling system	Environmental Information Processing	Signal transduction	12	228	102	2681	0.152939	0.413632	1.38338	circRNA_0389|Chr1:185252579_185264972_+(Pik3c2a);circRNA_0391|Chr1:185261106_185267832_+(Pik3c2a);circRNA_0394|Chr1:185263914_185297636_+(Pik3c2a);circRNA_0419|Chr1:192379875_192409606_+(Prkcb);circRNA_0445|Chr1:200102205_200105174_+(Inpp5f);circRNA_1236|Chr10:96264760_96266403_-(Prkca);circRNA_2072|Chr14:60573253_60586776_-(Pi4k2b);circRNA_2364|Chr15:60816746_60821766_-(Dgkh);circRNA_4663|Chr4:6…	rno04070
rno04071	Sphingolipid signaling pathway	Environmental Information Processing	Signal transduction	8	228	88	2681	0.477132	0.692423	1.06898	circRNA_0419|Chr1:192379875_192409606_+(Prkcb);circRNA_1236|Chr10:96264760_96266403_-(Prkca);circRNA_1498|Chr12:4448685_4450137_-(Cers4);circRNA_1858|Chr13:95167819_95196402_-(Akt3);circRNA_1859|Chr13:95167819_95208329_-(Akt3);circRNA_3515|Chr2:113747182_113764892_+(Pld1);circRNA_3818|Chr2:240854068_240861760_-(Nfkb1);circRNA_6215|Chr7:130113212_130116591_-(Mapk12);	rno04071
rno04072	Phospholipase D signaling pathway	Environmental Information Processing	Signal transduction	18	228	89	2681	0.000346617	0.0412474	2.37818	circRNA_0110|Chr1:48792572_48797638_-(Agpat4);circRNA_1236|Chr10:96264760_96266403_-(Prkca);circRNA_1397|Chr11:68722906_68725314_-(Adcy5);circRNA_1399|Chr11:68745884_68750272_-(Adcy5);circRNA_1762|Chr13:67141798_67143114_-(Pla2g4a);circRNA_1858|Chr13:95167819_95196402_-(Akt3);circRNA_1859|Chr13:95167819_95208329_-(Akt3);circRNA_2143|Chr14:87328008_87377952_+(Adcy1);circRNA_2144|Chr14:87331763_873…	rno04072
rno04080	Neuroactive ligand-receptor interaction	Environmental Information Processing	Signaling molecules and interaction	3	228	14	2681	0.109875	0.376949	2.51974	circRNA_0839|Chr10:5930383_5930975_+(Grin2a);circRNA_3978|Chr20:31900597_31901729_+(Tacr2);circRNA_5249|Chr5:120609027_120616745_+(Lepr);	rno04080
rno04110	Cell cycle	Cellular Processes	Cell growth and death	5	228	72	2681	0.746829	0.854544	0.816581	circRNA_3031|Chr18:69634006_69647714_-(Smad4);circRNA_3059|Chr18:72593000_72611211_+(Smad2);circRNA_6611|Chr8:109243253_109288160_+(Stag1);circRNA_6612|Chr8:109250465_109254764_+(Stag1);circRNA_6862|Chr9:65361368_65364133_-(Orc2);	rno04110
rno04114	Oocyte meiosis	Cellular Processes	Cell growth and death	11	228	70	2681	0.0318078	0.222655	1.84781	circRNA_0661|Chr1:255685048_255694514_-(Cpeb3);circRNA_0663|Chr1:255727112_255764689_-(Cpeb3);circRNA_1397|Chr11:68722906_68725314_-(Adcy5);circRNA_1399|Chr11:68745884_68750272_-(Adcy5);circRNA_2143|Chr14:87328008_87377952_+(Adcy1);circRNA_2144|Chr14:87331763_87357732_+(Adcy1);circRNA_2145|Chr14:87350088_87357732_+(Adcy1);circRNA_2334|Chr15:51896716_51944899_-(Ppp3cc);circRNA_2337|Chr15:51925689_…	rno04114
rno04120	Ubiquitin mediated proteolysis	Genetic Information Processing	Folding, sorting and degradation	9	228	120	2681	0.705846	0.827543	0.881908	circRNA_0999|Chr10:59192184_59239990_+(Ube2g1);circRNA_1368|Chr11:51049296_51068978_-(Cblb);circRNA_3007|Chr18:60691028_60702777_+(Nedd4l);circRNA_4426|Chr3:150692740_150696569_+(Itch);circRNA_4428|Chr3:150717267_150725392_+(Itch);circRNA_4429|Chr3:150717267_150727954_+(Itch);circRNA_4430|Chr3:150717267_150734719_+(Itch);circRNA_6271|Chr8:6014617_6023899_-(Birc2);circRNA_7064|ChrX:1729687_1730287…	rno04120
rno04130	SNARE interactions in vesicular transport	Genetic Information Processing	Folding, sorting and degradation	1	228	6	2681	0.413621	0.651933	1.9598	circRNA_1032|Chr10:63412175_63412639_+(Gosr1);	rno04130
rno04137	Mitophagy - animal	Cellular Processes	Transport and catabolism	1	228	33	2681	0.947736	0.959834	0.356326	circRNA_1066|Chr10:67579952_67587851_+(Rhot1);	rno04137
rno04140	Autophagy - animal	Cellular Processes	Transport and catabolism	5	228	77	2681	0.798022	0.882465	0.763557	circRNA_0316|Chr1:163965001_164064815_-(Uvrag);circRNA_1858|Chr13:95167819_95196402_-(Akt3);circRNA_1859|Chr13:95167819_95208329_-(Akt3);circRNA_4518|Chr4:6866069_6869642_+(Rheb);circRNA_6125|Chr7:94895697_94898194_+(Deptor);	rno04140
rno04141	Protein processing in endoplasmic reticulum	Genetic Information Processing	Folding, sorting and degradation	6	228	86	2681	0.753814	0.85701	0.820379	circRNA_0914|Chr10:37167400_37172772_-(Sec24a);circRNA_0999|Chr10:59192184_59239990_+(Ube2g1);circRNA_1847|Chr13:89163767_89176307_-(Atf6);circRNA_1880|Chr13:100885656_100893577_-(Capn2);circRNA_2632|Chr17:6857810_6864981_+(Ubqln1);circRNA_3249|Chr19:52169070_52171485_-(Mbtps1);	rno04141
rno04142	Lysosome	Cellular Processes	Transport and catabolism	1	228	50	2681	0.988745	0.991426	0.235175	circRNA_5959|Chr7:28987514_28990116_+(Gnptab);	rno04142
rno04144	Endocytosis	Cellular Processes	Transport and catabolism	23	228	193	2681	0.0562464	0.291014	1.4013	circRNA_0193|Chr1:100913425_100914082_-(Ap2a1);circRNA_0451|Chr1:200671013_200672411_-(Fgfr2);circRNA_0503|Chr1:214562895_214581660_+(Ap2a2);circRNA_0989|Chr10:57549452_57549919_+(Rabep1);circRNA_0990|Chr10:57549452_57563686_+(Rabep1);circRNA_1284|Chr11:2672491_2678232_-(Chmp2b);circRNA_1368|Chr11:51049296_51068978_-(Cblb);circRNA_1411|Chr11:70724569_70728535_-(Snx4);circRNA_2158|Chr14:100058305_…	rno04144
rno04145	Phagosome	Cellular Processes	Transport and catabolism	3	228	61	2681	0.903253	0.926613	0.5783	circRNA_3872|Chr20:3232306_3273815_+(RT1-T24-3);circRNA_4147|Chr3:46525736_46528994_-(Pla2r1);circRNA_6920|Chr9:71920586_71960153_+(Pikfyve);	rno04145
rno04146	Peroxisome	Cellular Processes	Transport and catabolism	1	228	22	2681	0.859616	0.901448	0.53449	circRNA_0267|Chr1:141877382_141880461_-(Idh2);	rno04146
rno04150	mTOR signaling pathway	Environmental Information Processing	Signal transduction	9	228	89	2681	0.343432	0.605459	1.18909	circRNA_0419|Chr1:192379875_192409606_+(Prkcb);circRNA_1236|Chr10:96264760_96266403_-(Prkca);circRNA_1858|Chr13:95167819_95196402_-(Akt3);circRNA_1859|Chr13:95167819_95208329_-(Akt3);circRNA_4518|Chr4:6866069_6869642_+(Rheb);circRNA_4700|Chr4:67399951_67412670_-(Braf);circRNA_4917|Chr4:168213382_168221653_-(Lrp6);circRNA_5722|Chr6:91933750_91961861_-(Sos2);circRNA_6125|Chr7:94895697_94898194_+(De…	rno04150
rno04151	PI3K-Akt signaling pathway	Environmental Information Processing	Signal transduction	14	228	161	2681	0.508022	0.715725	1.0225	circRNA_0451|Chr1:200671013_200672411_-(Fgfr2);circRNA_1151|Chr10:82753666_82754365_+(Col1a1);circRNA_1155|Chr10:82756914_82757163_+(Col1a1);circRNA_1236|Chr10:96264760_96266403_-(Prkca);circRNA_1858|Chr13:95167819_95196402_-(Akt3);circRNA_1859|Chr13:95167819_95208329_-(Akt3);circRNA_2158|Chr14:100058305_100066787_+(Egfr);circRNA_3428|Chr2:47182739_47203913_-(Itga1);circRNA_3818|Chr2:240854068_24…	rno04151
rno04152	AMPK signaling pathway	Environmental Information Processing	Signal transduction	5	228	63	2681	0.63224	0.796154	0.933236	circRNA_1858|Chr13:95167819_95196402_-(Akt3);circRNA_1859|Chr13:95167819_95208329_-(Akt3);circRNA_2062|Chr14:45683767_45691895_-(Tbc1d1);circRNA_4518|Chr4:6866069_6869642_+(Rheb);circRNA_5249|Chr5:120609027_120616745_+(Lepr);	rno04152
rno04210	Apoptosis	Cellular Processes	Cell growth and death	5	228	62	2681	0.617764	0.794854	0.948288	circRNA_1858|Chr13:95167819_95196402_-(Akt3);circRNA_1859|Chr13:95167819_95208329_-(Akt3);circRNA_1880|Chr13:100885656_100893577_-(Capn2);circRNA_3818|Chr2:240854068_240861760_-(Nfkb1);circRNA_6271|Chr8:6014617_6023899_-(Birc2);	rno04210
rno04211	Longevity regulating pathway - mammal	Organismal Systems	Aging	9	228	64	2681	0.0888454	0.362371	1.65358	circRNA_1397|Chr11:68722906_68725314_-(Adcy5);circRNA_1399|Chr11:68745884_68750272_-(Adcy5);circRNA_1858|Chr13:95167819_95196402_-(Akt3);circRNA_1859|Chr13:95167819_95208329_-(Akt3);circRNA_2143|Chr14:87328008_87377952_+(Adcy1);circRNA_2144|Chr14:87331763_87357732_+(Adcy1);circRNA_2145|Chr14:87350088_87357732_+(Adcy1);circRNA_3818|Chr2:240854068_240861760_-(Nfkb1);circRNA_4518|Chr4:6866069_686964…	rno04211
rno04213	Longevity regulating pathway - multiple species	Organismal Systems	Aging	7	228	31	2681	0.0131163	0.136045	2.65521	circRNA_1397|Chr11:68722906_68725314_-(Adcy5);circRNA_1399|Chr11:68745884_68750272_-(Adcy5);circRNA_1858|Chr13:95167819_95196402_-(Akt3);circRNA_1859|Chr13:95167819_95208329_-(Akt3);circRNA_2143|Chr14:87328008_87377952_+(Adcy1);circRNA_2144|Chr14:87331763_87357732_+(Adcy1);circRNA_2145|Chr14:87350088_87357732_+(Adcy1);	rno04213
rno04215	Apoptosis - multiple species	Cellular Processes	Cell growth and death	1	228	9	2681	0.551189	0.749617	1.30653	circRNA_6271|Chr8:6014617_6023899_-(Birc2);	rno04215
rno04217	Necroptosis	Cellular Processes	Cell growth and death	5	228	44	2681	0.317893	0.581989	1.33622	circRNA_1284|Chr11:2672491_2678232_-(Chmp2b);circRNA_1762|Chr13:67141798_67143114_-(Pla2g4a);circRNA_1880|Chr13:100885656_100893577_-(Capn2);circRNA_2271|Chr15:34277381_34277914_+(Rnf31);circRNA_6271|Chr8:6014617_6023899_-(Birc2);	rno04217
rno04218	Cellular senescence	Cellular Processes	Cell growth and death	13	228	111	2681	0.144255	0.399217	1.37715	circRNA_1644|Chr12:39719713_39721351_+(Rad9b);circRNA_1858|Chr13:95167819_95196402_-(Akt3);circRNA_1859|Chr13:95167819_95208329_-(Akt3);circRNA_1880|Chr13:100885656_100893577_-(Capn2);circRNA_2334|Chr15:51896716_51944899_-(Ppp3cc);circRNA_2337|Chr15:51925689_51954838_-(Ppp3cc);circRNA_3059|Chr18:72593000_72611211_+(Smad2);circRNA_3818|Chr2:240854068_240861760_-(Nfkb1);circRNA_3872|Chr20:3232306_3…	rno04218
rno04260	Cardiac muscle contraction	Organismal Systems	Circulatory system	6	228	39	2681	0.108341	0.376949	1.80904	circRNA_1740|Chr13:52671461_52673721_+(Tnnt2);circRNA_4864|Chr4:151118221_151124504_-(Cacna1c);circRNA_5502|Chr6:4259110_4315062_-(Slc8a1);circRNA_5503|Chr6:4278307_4315062_-(Slc8a1);circRNA_5504|Chr6:4298605_4315062_-(Slc8a1);circRNA_6597|Chr8:104192886_104202285_-(Atp1b3);	rno04260
rno04261	Adrenergic signaling in cardiomyocytes	Organismal Systems	Circulatory system	19	228	102	2681	0.000710876	0.0563962	2.19036	circRNA_1236|Chr10:96264760_96266403_-(Prkca);circRNA_1397|Chr11:68722906_68725314_-(Adcy5);circRNA_1399|Chr11:68745884_68750272_-(Adcy5);circRNA_1725|Chr13:50150091_50150276_-(Atp2b4);circRNA_1740|Chr13:52671461_52673721_+(Tnnt2);circRNA_1858|Chr13:95167819_95196402_-(Akt3);circRNA_1859|Chr13:95167819_95208329_-(Akt3);circRNA_2143|Chr14:87328008_87377952_+(Adcy1);circRNA_2144|Chr14:87331763_8735…	rno04261
rno04270	Vascular smooth muscle contraction	Organismal Systems	Circulatory system	17	228	132	2681	0.0516171	0.279522	1.51439	circRNA_0419|Chr1:192379875_192409606_+(Prkcb);circRNA_0650|Chr1:252537894_252539495_+(Acta2);circRNA_0793|Chr10:776697_822670_+(Myh11);circRNA_0795|Chr10:776884_783703_+(Myh11);circRNA_0799|Chr10:805713_819703_+(Myh11);circRNA_1236|Chr10:96264760_96266403_-(Prkca);circRNA_1397|Chr11:68722906_68725314_-(Adcy5);circRNA_1399|Chr11:68745884_68750272_-(Adcy5);circRNA_1762|Chr13:67141798_67143114_-(Pl…	rno04270
rno04310	Wnt signaling pathway	Environmental Information Processing	Signal transduction	7	228	88	2681	0.632065	0.796154	0.935357	circRNA_0419|Chr1:192379875_192409606_+(Prkcb);circRNA_1236|Chr10:96264760_96266403_-(Prkca);circRNA_2334|Chr15:51896716_51944899_-(Ppp3cc);circRNA_2337|Chr15:51925689_51954838_-(Ppp3cc);circRNA_3031|Chr18:69634006_69647714_-(Smad4);circRNA_3807|Chr2:237235103_237240502_+(Dkk2);circRNA_4917|Chr4:168213382_168221653_-(Lrp6);	rno04310
rno04330	Notch signaling pathway	Environmental Information Processing	Signal transduction	1	228	19	2681	0.816335	0.891228	0.618883	circRNA_1620|Chr12:36930749_36931726_+(Ncor2);	rno04330
rno04340	Hedgehog signaling pathway	Environmental Information Processing	Signal transduction	2	228	25	2681	0.64101	0.796367	0.940702	circRNA_1383|Chr11:61121301_61122547_+(Boc);circRNA_6332|Chr8:36673405_36682424_+(Cdon);	rno04340
rno04350	TGF-beta signaling pathway	Environmental Information Processing	Signal transduction	3	228	62	2681	0.909163	0.928673	0.568973	circRNA_3031|Chr18:69634006_69647714_-(Smad4);circRNA_3059|Chr18:72593000_72611211_+(Smad2);circRNA_5536|Chr6:21334766_21354603_-(Ltbp1);	rno04350
rno04360	Axon guidance	Organismal Systems	Development and regeneration	9	228	115	2681	0.655765	0.796367	0.920252	circRNA_1236|Chr10:96264760_96266403_-(Prkca);circRNA_1383|Chr11:61121301_61122547_+(Boc);circRNA_2334|Chr15:51896716_51944899_-(Ppp3cc);circRNA_2337|Chr15:51925689_51954838_-(Ppp3cc);circRNA_4560|Chr4:18311528_18331379_-(Sema3a);circRNA_6150|Chr7:114466514_114468769_-(Ptk2);circRNA_6155|Chr7:114555889_114562987_-(Ptk2);circRNA_6344|Chr8:47335866_47339341_-(Arhgef12);circRNA_6814|Chr9:50313687_50…	rno04360
rno04370	VEGF signaling pathway	Environmental Information Processing	Signal transduction	10	228	60	2681	0.027595	0.199019	1.9598	circRNA_0419|Chr1:192379875_192409606_+(Prkcb);circRNA_1236|Chr10:96264760_96266403_-(Prkca);circRNA_1762|Chr13:67141798_67143114_-(Pla2g4a);circRNA_1858|Chr13:95167819_95196402_-(Akt3);circRNA_1859|Chr13:95167819_95208329_-(Akt3);circRNA_2334|Chr15:51896716_51944899_-(Ppp3cc);circRNA_2337|Chr15:51925689_51954838_-(Ppp3cc);circRNA_6150|Chr7:114466514_114468769_-(Ptk2);circRNA_6155|Chr7:114555889_…	rno04370
rno04371	Apelin signaling pathway	Environmental Information Processing	Signal transduction	16	228	111	2681	0.023261	0.18732	1.69496	circRNA_0650|Chr1:252537894_252539495_+(Acta2);circRNA_1397|Chr11:68722906_68725314_-(Adcy5);circRNA_1399|Chr11:68745884_68750272_-(Adcy5);circRNA_1858|Chr13:95167819_95196402_-(Akt3);circRNA_1859|Chr13:95167819_95208329_-(Akt3);circRNA_2143|Chr14:87328008_87377952_+(Adcy1);circRNA_2144|Chr14:87331763_87357732_+(Adcy1);circRNA_2145|Chr14:87350088_87357732_+(Adcy1);circRNA_3031|Chr18:69634006_6964…	rno04371
rno04380	Osteoclast differentiation	Organismal Systems	Development and regeneration	6	228	64	2681	0.465377	0.679508	1.10238	circRNA_1858|Chr13:95167819_95196402_-(Akt3);circRNA_1859|Chr13:95167819_95208329_-(Akt3);circRNA_2334|Chr15:51896716_51944899_-(Ppp3cc);circRNA_2337|Chr15:51925689_51954838_-(Ppp3cc);circRNA_3818|Chr2:240854068_240861760_-(Nfkb1);circRNA_6215|Chr7:130113212_130116591_-(Mapk12);	rno04380
rno04390	Hippo signaling pathway	Environmental Information Processing	Signal transduction	6	228	84	2681	0.733057	0.847742	0.839912	circRNA_2136|Chr14:85057352_85061960_-(Nf2);circRNA_3031|Chr18:69634006_69647714_-(Smad4);circRNA_3059|Chr18:72593000_72611211_+(Smad2);circRNA_5562|Chr6:23554728_23563843_-(Ppp1cb);circRNA_6075|Chr7:73684650_73748233_-(Stk3);circRNA_6271|Chr8:6014617_6023899_-(Birc2);	rno04390
rno04392	Hippo signaling pathway - multiple species	Environmental Information Processing	Signal transduction	2	228	26	2681	0.662524	0.796367	0.904521	circRNA_2136|Chr14:85057352_85061960_-(Nf2);circRNA_6075|Chr7:73684650_73748233_-(Stk3);	rno04392
rno04510	Focal adhesion	Cellular Processes	Cellular community - eukaryotes	19	228	192	2681	0.27291	0.539653	1.16363	circRNA_0419|Chr1:192379875_192409606_+(Prkcb);circRNA_1151|Chr10:82753666_82754365_+(Col1a1);circRNA_1155|Chr10:82756914_82757163_+(Col1a1);circRNA_1236|Chr10:96264760_96266403_-(Prkca);circRNA_1858|Chr13:95167819_95196402_-(Akt3);circRNA_1859|Chr13:95167819_95208329_-(Akt3);circRNA_1880|Chr13:100885656_100893577_-(Capn2);circRNA_2158|Chr14:100058305_100066787_+(Egfr);circRNA_3428|Chr2:47182739_…	rno04510
rno04512	ECM-receptor interaction	Environmental Information Processing	Signaling molecules and interaction	4	228	70	2681	0.859784	0.901448	0.67193	circRNA_1151|Chr10:82753666_82754365_+(Col1a1);circRNA_1155|Chr10:82756914_82757163_+(Col1a1);circRNA_3428|Chr2:47182739_47203913_-(Itga1);circRNA_6680|Chr8:127289436_127301219_+(Itga9);	rno04512
rno04514	Cell adhesion molecules (CAMs)	Environmental Information Processing	Signaling molecules and interaction	3	228	51	2681	0.82255	0.893913	0.691692	circRNA_3872|Chr20:3232306_3273815_+(RT1-T24-3);circRNA_6399|Chr8:63332376_63335340_-(Cd276);circRNA_6680|Chr8:127289436_127301219_+(Itga9);	rno04514
rno04520	Adherens junction	Cellular Processes	Cellular community - eukaryotes	7	228	112	2681	0.854179	0.901448	0.734923	circRNA_0271|Chr1:142556681_142565170_-(Iqgap1);circRNA_0696|Chr1:259412482_259459540_-(Sorbs1);circRNA_0715|Chr1:259479327_259488326_-(Sorbs1);circRNA_2158|Chr14:100058305_100066787_+(Egfr);circRNA_3031|Chr18:69634006_69647714_-(Smad4);circRNA_3059|Chr18:72593000_72611211_+(Smad2);circRNA_5754|Chr6:103389817_103393554_-(Actn1);	rno04520
rno04530	Tight junction	Cellular Processes	Cellular community - eukaryotes	8	228	118	2681	0.800892	0.882465	0.797205	circRNA_0793|Chr10:776697_822670_+(Myh11);circRNA_0795|Chr10:776884_783703_+(Myh11);circRNA_0799|Chr10:805713_819703_+(Myh11);circRNA_2136|Chr14:85057352_85061960_-(Nf2);circRNA_3007|Chr18:60691028_60702777_+(Nedd4l);circRNA_4014|Chr20:50444171_50448905_+(Bves);circRNA_4812|Chr4:125734597_125789911_-(Magi1);circRNA_5754|Chr6:103389817_103393554_-(Actn1);	rno04530
rno04540	Gap junction	Cellular Processes	Cellular community - eukaryotes	9	228	65	2681	0.0958714	0.368535	1.62814	circRNA_0419|Chr1:192379875_192409606_+(Prkcb);circRNA_1236|Chr10:96264760_96266403_-(Prkca);circRNA_1397|Chr11:68722906_68725314_-(Adcy5);circRNA_1399|Chr11:68745884_68750272_-(Adcy5);circRNA_2143|Chr14:87328008_87377952_+(Adcy1);circRNA_2144|Chr14:87331763_87357732_+(Adcy1);circRNA_2145|Chr14:87350088_87357732_+(Adcy1);circRNA_2158|Chr14:100058305_100066787_+(Egfr);circRNA_5722|Chr6:91933750_91…	rno04540
rno04550	Signaling pathways regulating pluripotency of stem cells	Cellular Processes	Cellular community - eukaryotes	6	228	60	2681	0.402766	0.651933	1.17588	circRNA_0451|Chr1:200671013_200672411_-(Fgfr2);circRNA_1858|Chr13:95167819_95196402_-(Akt3);circRNA_1859|Chr13:95167819_95208329_-(Akt3);circRNA_3031|Chr18:69634006_69647714_-(Smad4);circRNA_3059|Chr18:72593000_72611211_+(Smad2);circRNA_6215|Chr7:130113212_130116591_-(Mapk12);	rno04550
rno04610	Complement and coagulation cascades	Organismal Systems	Immune system	1	228	12	2681	0.656591	0.796367	0.979898	circRNA_2686|Chr17:28580286_28608641_+(F13a1);	rno04610
rno04611	Platelet activation	Organismal Systems	Immune system	14	228	122	2681	0.149678	0.409465	1.34937	circRNA_1151|Chr10:82753666_82754365_+(Col1a1);circRNA_1155|Chr10:82756914_82757163_+(Col1a1);circRNA_1397|Chr11:68722906_68725314_-(Adcy5);circRNA_1399|Chr11:68745884_68750272_-(Adcy5);circRNA_1762|Chr13:67141798_67143114_-(Pla2g4a);circRNA_1858|Chr13:95167819_95196402_-(Akt3);circRNA_1859|Chr13:95167819_95208329_-(Akt3);circRNA_2143|Chr14:87328008_87377952_+(Adcy1);circRNA_2144|Chr14:87331763_8…	rno04611
rno04612	Antigen processing and presentation	Organismal Systems	Immune system	1	228	23	2681	0.871653	0.909884	0.511251	circRNA_3872|Chr20:3232306_3273815_+(RT1-T24-3);	rno04612
rno04620	Toll-like receptor signaling pathway	Organismal Systems	Immune system	5	228	33	2681	0.143538	0.399217	1.78163	circRNA_1858|Chr13:95167819_95196402_-(Akt3);circRNA_1859|Chr13:95167819_95208329_-(Akt3);circRNA_3818|Chr2:240854068_240861760_-(Nfkb1);circRNA_5882|Chr6:135672583_135696475_+(Traf3);circRNA_6215|Chr7:130113212_130116591_-(Mapk12);	rno04620
rno04621	NOD-like receptor signaling pathway	Organismal Systems	Immune system	6	228	64	2681	0.465377	0.679508	1.10238	circRNA_0993|Chr10:57627261_57634588_-(Dhx33);circRNA_2271|Chr15:34277381_34277914_+(Rnf31);circRNA_3818|Chr2:240854068_240861760_-(Nfkb1);circRNA_5882|Chr6:135672583_135696475_+(Traf3);circRNA_6215|Chr7:130113212_130116591_-(Mapk12);circRNA_6271|Chr8:6014617_6023899_-(Birc2);	rno04621
rno04622	RIG-I-like receptor signaling pathway	Organismal Systems	Immune system	3	228	23	2681	0.31053	0.572916	1.53375	circRNA_3818|Chr2:240854068_240861760_-(Nfkb1);circRNA_5882|Chr6:135672583_135696475_+(Traf3);circRNA_6215|Chr7:130113212_130116591_-(Mapk12);	rno04622
rno04623	Cytosolic DNA-sensing pathway	Organismal Systems	Immune system	1	228	11	2681	0.624528	0.794854	1.06898	circRNA_3818|Chr2:240854068_240861760_-(Nfkb1);	rno04623
rno04625	C-type lectin receptor signaling pathway	Organismal Systems	Immune system	8	228	69	2681	0.228847	0.527427	1.36334	circRNA_1368|Chr11:51049296_51068978_-(Cblb);circRNA_1858|Chr13:95167819_95196402_-(Akt3);circRNA_1859|Chr13:95167819_95208329_-(Akt3);circRNA_2334|Chr15:51896716_51944899_-(Ppp3cc);circRNA_2337|Chr15:51925689_51954838_-(Ppp3cc);circRNA_3818|Chr2:240854068_240861760_-(Nfkb1);circRNA_6215|Chr7:130113212_130116591_-(Mapk12);circRNA_6344|Chr8:47335866_47339341_-(Arhgef12);	rno04625
rno04630	Jak-STAT signaling pathway	Environmental Information Processing	Signal transduction	6	228	52	2681	0.278131	0.542584	1.35678	circRNA_1168|Chr10:85313576_85314836_+(Socs7);circRNA_1858|Chr13:95167819_95196402_-(Akt3);circRNA_1859|Chr13:95167819_95208329_-(Akt3);circRNA_2158|Chr14:100058305_100066787_+(Egfr);circRNA_5249|Chr5:120609027_120616745_+(Lepr);circRNA_5722|Chr6:91933750_91961861_-(Sos2);	rno04630
rno04640	Hematopoietic cell lineage	Organismal Systems	Immune system	1	228	18	2681	0.799137	0.882465	0.653265	circRNA_3428|Chr2:47182739_47203913_-(Itga1);	rno04640
rno04650	Natural killer cell mediated cytotoxicity	Organismal Systems	Immune system	7	228	60	2681	0.245063	0.527427	1.37186	circRNA_0419|Chr1:192379875_192409606_+(Prkcb);circRNA_1236|Chr10:96264760_96266403_-(Prkca);circRNA_2334|Chr15:51896716_51944899_-(Ppp3cc);circRNA_2337|Chr15:51925689_51954838_-(Ppp3cc);circRNA_3872|Chr20:3232306_3273815_+(RT1-T24-3);circRNA_4700|Chr4:67399951_67412670_-(Braf);circRNA_5722|Chr6:91933750_91961861_-(Sos2);	rno04650
rno04657	IL-17 signaling pathway	Organismal Systems	Immune system	3	228	24	2681	0.3347	0.603067	1.46985	circRNA_3818|Chr2:240854068_240861760_-(Nfkb1);circRNA_5882|Chr6:135672583_135696475_+(Traf3);circRNA_6215|Chr7:130113212_130116591_-(Mapk12);	rno04657
rno04658	Th1 and Th2 cell differentiation	Organismal Systems	Immune system	4	228	43	2681	0.503964	0.715725	1.09384	circRNA_2334|Chr15:51896716_51944899_-(Ppp3cc);circRNA_2337|Chr15:51925689_51954838_-(Ppp3cc);circRNA_3818|Chr2:240854068_240861760_-(Nfkb1);circRNA_6215|Chr7:130113212_130116591_-(Mapk12);	rno04658
rno04659	Th17 cell differentiation	Organismal Systems	Immune system	6	228	61	2681	0.418512	0.655302	1.1566	circRNA_2334|Chr15:51896716_51944899_-(Ppp3cc);circRNA_2337|Chr15:51925689_51954838_-(Ppp3cc);circRNA_3031|Chr18:69634006_69647714_-(Smad4);circRNA_3059|Chr18:72593000_72611211_+(Smad2);circRNA_3818|Chr2:240854068_240861760_-(Nfkb1);circRNA_6215|Chr7:130113212_130116591_-(Mapk12);	rno04659
rno04660	T cell receptor signaling pathway	Organismal Systems	Immune system	9	228	80	2681	0.236177	0.527427	1.32286	circRNA_1368|Chr11:51049296_51068978_-(Cblb);circRNA_1858|Chr13:95167819_95196402_-(Akt3);circRNA_1859|Chr13:95167819_95208329_-(Akt3);circRNA_2334|Chr15:51896716_51944899_-(Ppp3cc);circRNA_2337|Chr15:51925689_51954838_-(Ppp3cc);circRNA_3818|Chr2:240854068_240861760_-(Nfkb1);circRNA_5722|Chr6:91933750_91961861_-(Sos2);circRNA_6215|Chr7:130113212_130116591_-(Mapk12);circRNA_6814|Chr9:50313687_5033…	rno04660
rno04662	B cell receptor signaling pathway	Organismal Systems	Immune system	7	228	58	2681	0.219055	0.511153	1.41916	circRNA_0419|Chr1:192379875_192409606_+(Prkcb);circRNA_1858|Chr13:95167819_95196402_-(Akt3);circRNA_1859|Chr13:95167819_95208329_-(Akt3);circRNA_2334|Chr15:51896716_51944899_-(Ppp3cc);circRNA_2337|Chr15:51925689_51954838_-(Ppp3cc);circRNA_3818|Chr2:240854068_240861760_-(Nfkb1);circRNA_5722|Chr6:91933750_91961861_-(Sos2);	rno04662
rno04664	Fc epsilon RI signaling pathway	Organismal Systems	Immune system	6	228	40	2681	0.118911	0.387683	1.76382	circRNA_1236|Chr10:96264760_96266403_-(Prkca);circRNA_1762|Chr13:67141798_67143114_-(Pla2g4a);circRNA_1858|Chr13:95167819_95196402_-(Akt3);circRNA_1859|Chr13:95167819_95208329_-(Akt3);circRNA_5722|Chr6:91933750_91961861_-(Sos2);circRNA_6215|Chr7:130113212_130116591_-(Mapk12);	rno04664
rno04666	Fc gamma R-mediated phagocytosis	Organismal Systems	Immune system	6	228	51	2681	0.263129	0.539653	1.38338	circRNA_0419|Chr1:192379875_192409606_+(Prkcb);circRNA_1236|Chr10:96264760_96266403_-(Prkca);circRNA_1762|Chr13:67141798_67143114_-(Pla2g4a);circRNA_1858|Chr13:95167819_95196402_-(Akt3);circRNA_1859|Chr13:95167819_95208329_-(Akt3);circRNA_3515|Chr2:113747182_113764892_+(Pld1);	rno04666
rno04668	TNF signaling pathway	Environmental Information Processing	Signal transduction	12	228	65	2681	0.00738455	0.136045	2.17085	circRNA_1858|Chr13:95167819_95196402_-(Akt3);circRNA_1859|Chr13:95167819_95208329_-(Akt3);circRNA_3818|Chr2:240854068_240861760_-(Nfkb1);circRNA_4426|Chr3:150692740_150696569_+(Itch);circRNA_4428|Chr3:150717267_150725392_+(Itch);circRNA_4429|Chr3:150717267_150727954_+(Itch);circRNA_4430|Chr3:150717267_150734719_+(Itch);circRNA_5802|Chr6:124596541_124629605_-(Rps6ka5);circRNA_5807|Chr6:124651885_1…	rno04668
rno04670	Leukocyte transendothelial migration	Organismal Systems	Immune system	6	228	63	2681	0.449841	0.679508	1.11988	circRNA_0419|Chr1:192379875_192409606_+(Prkcb);circRNA_1236|Chr10:96264760_96266403_-(Prkca);circRNA_5754|Chr6:103389817_103393554_-(Actn1);circRNA_6150|Chr7:114466514_114468769_-(Ptk2);circRNA_6155|Chr7:114555889_114562987_-(Ptk2);circRNA_6215|Chr7:130113212_130116591_-(Mapk12);	rno04670
rno04713	Circadian entrainment	Organismal Systems	Environmental adaptation	13	228	77	2681	0.0115323	0.136045	1.98525	circRNA_0419|Chr1:192379875_192409606_+(Prkcb);circRNA_0839|Chr10:5930383_5930975_+(Grin2a);circRNA_1236|Chr10:96264760_96266403_-(Prkca);circRNA_1397|Chr11:68722906_68725314_-(Adcy5);circRNA_1399|Chr11:68745884_68750272_-(Adcy5);circRNA_2143|Chr14:87328008_87377952_+(Adcy1);circRNA_2144|Chr14:87331763_87357732_+(Adcy1);circRNA_2145|Chr14:87350088_87357732_+(Adcy1);circRNA_4281|Chr3:104375097_104…	rno04713
rno04714	Thermogenesis	Organismal Systems	Environmental adaptation	8	228	74	2681	0.2909	0.562879	1.27122	circRNA_1397|Chr11:68722906_68725314_-(Adcy5);circRNA_1399|Chr11:68745884_68750272_-(Adcy5);circRNA_2143|Chr14:87328008_87377952_+(Adcy1);circRNA_2144|Chr14:87331763_87357732_+(Adcy1);circRNA_2145|Chr14:87350088_87357732_+(Adcy1);circRNA_4518|Chr4:6866069_6869642_+(Rheb);circRNA_5722|Chr6:91933750_91961861_-(Sos2);circRNA_6215|Chr7:130113212_130116591_-(Mapk12);	rno04714
rno04720	Long-term potentiation	Organismal Systems	Nervous system	11	228	77	2681	0.0581273	0.294347	1.67982	circRNA_0419|Chr1:192379875_192409606_+(Prkcb);circRNA_0839|Chr10:5930383_5930975_+(Grin2a);circRNA_1236|Chr10:96264760_96266403_-(Prkca);circRNA_2143|Chr14:87328008_87377952_+(Adcy1);circRNA_2144|Chr14:87331763_87357732_+(Adcy1);circRNA_2145|Chr14:87350088_87357732_+(Adcy1);circRNA_2334|Chr15:51896716_51944899_-(Ppp3cc);circRNA_2337|Chr15:51925689_51954838_-(Ppp3cc);circRNA_4700|Chr4:67399951_67…	rno04720
rno04721	Synaptic vesicle cycle	Organismal Systems	Nervous system	3	228	27	2681	0.406651	0.651933	1.30653	circRNA_0193|Chr1:100913425_100914082_-(Ap2a1);circRNA_0503|Chr1:214562895_214581660_+(Ap2a2);circRNA_3140|Chr19:25721379_25722171_+(Cacna1a);	rno04721
rno04722	Neurotrophin signaling pathway	Organismal Systems	Nervous system	12	228	90	2681	0.0757578	0.340195	1.56784	circRNA_0259|Chr1:139943398_139956356_-(Ntrk3);circRNA_1212|Chr10:94292693_94314584_+(Map3k3);circRNA_1858|Chr13:95167819_95196402_-(Akt3);circRNA_1859|Chr13:95167819_95208329_-(Akt3);circRNA_3150|Chr19:30869716_30883569_+(Gab1);circRNA_3818|Chr2:240854068_240861760_-(Nfkb1);circRNA_4700|Chr4:67399951_67412670_-(Braf);circRNA_5722|Chr6:91933750_91961861_-(Sos2);circRNA_5802|Chr6:124596541_1246296…	rno04722
rno04723	Retrograde endocannabinoid signaling	Organismal Systems	Nervous system	10	228	54	2681	0.0137349	0.136045	2.17755	circRNA_0419|Chr1:192379875_192409606_+(Prkcb);circRNA_1236|Chr10:96264760_96266403_-(Prkca);circRNA_1397|Chr11:68722906_68725314_-(Adcy5);circRNA_1399|Chr11:68745884_68750272_-(Adcy5);circRNA_2143|Chr14:87328008_87377952_+(Adcy1);circRNA_2144|Chr14:87331763_87357732_+(Adcy1);circRNA_2145|Chr14:87350088_87357732_+(Adcy1);circRNA_3140|Chr19:25721379_25722171_+(Cacna1a);circRNA_4864|Chr4:151118221_…	rno04723
rno04724	Glutamatergic synapse	Organismal Systems	Nervous system	14	228	77	2681	0.00451287	0.11934	2.13796	circRNA_0419|Chr1:192379875_192409606_+(Prkcb);circRNA_0839|Chr10:5930383_5930975_+(Grin2a);circRNA_1236|Chr10:96264760_96266403_-(Prkca);circRNA_1397|Chr11:68722906_68725314_-(Adcy5);circRNA_1399|Chr11:68745884_68750272_-(Adcy5);circRNA_1762|Chr13:67141798_67143114_-(Pla2g4a);circRNA_2143|Chr14:87328008_87377952_+(Adcy1);circRNA_2144|Chr14:87331763_87357732_+(Adcy1);circRNA_2145|Chr14:87350088_8…	rno04724
rno04725	Cholinergic synapse	Organismal Systems	Nervous system	11	228	61	2681	0.0121204	0.136045	2.12043	circRNA_0419|Chr1:192379875_192409606_+(Prkcb);circRNA_1236|Chr10:96264760_96266403_-(Prkca);circRNA_1397|Chr11:68722906_68725314_-(Adcy5);circRNA_1399|Chr11:68745884_68750272_-(Adcy5);circRNA_1858|Chr13:95167819_95196402_-(Akt3);circRNA_1859|Chr13:95167819_95208329_-(Akt3);circRNA_2143|Chr14:87328008_87377952_+(Adcy1);circRNA_2144|Chr14:87331763_87357732_+(Adcy1);circRNA_2145|Chr14:87350088_8735…	rno04725
rno04726	Serotonergic synapse	Organismal Systems	Nervous system	10	228	59	2681	0.0247819	0.18732	1.99301	circRNA_0419|Chr1:192379875_192409606_+(Prkcb);circRNA_1236|Chr10:96264760_96266403_-(Prkca);circRNA_1299|Chr11:24479964_24512332_-(App);circRNA_1301|Chr11:24527899_24550752_-(App);circRNA_1397|Chr11:68722906_68725314_-(Adcy5);circRNA_1399|Chr11:68745884_68750272_-(Adcy5);circRNA_1762|Chr13:67141798_67143114_-(Pla2g4a);circRNA_3140|Chr19:25721379_25722171_+(Cacna1a);circRNA_4700|Chr4:67399951_674…	rno04726
rno04727	GABAergic synapse	Organismal Systems	Nervous system	9	228	35	2681	0.00196356	0.0934653	3.02368	circRNA_0419|Chr1:192379875_192409606_+(Prkcb);circRNA_1236|Chr10:96264760_96266403_-(Prkca);circRNA_1397|Chr11:68722906_68725314_-(Adcy5);circRNA_1399|Chr11:68745884_68750272_-(Adcy5);circRNA_2143|Chr14:87328008_87377952_+(Adcy1);circRNA_2144|Chr14:87331763_87357732_+(Adcy1);circRNA_2145|Chr14:87350088_87357732_+(Adcy1);circRNA_3140|Chr19:25721379_25722171_+(Cacna1a);circRNA_4864|Chr4:151118221_…	rno04727
rno04728	Dopaminergic synapse	Organismal Systems	Nervous system	13	228	85	2681	0.0251859	0.18732	1.7984	circRNA_0419|Chr1:192379875_192409606_+(Prkcb);circRNA_0839|Chr10:5930383_5930975_+(Grin2a);circRNA_1236|Chr10:96264760_96266403_-(Prkca);circRNA_1397|Chr11:68722906_68725314_-(Adcy5);circRNA_1399|Chr11:68745884_68750272_-(Adcy5);circRNA_1858|Chr13:95167819_95196402_-(Akt3);circRNA_1859|Chr13:95167819_95208329_-(Akt3);circRNA_2334|Chr15:51896716_51944899_-(Ppp3cc);circRNA_2337|Chr15:51925689_5195…	rno04728
rno04730	Long-term depression	Organismal Systems	Nervous system	5	228	48	2681	0.387782	0.6454	1.22487	circRNA_0419|Chr1:192379875_192409606_+(Prkcb);circRNA_1236|Chr10:96264760_96266403_-(Prkca);circRNA_1762|Chr13:67141798_67143114_-(Pla2g4a);circRNA_3140|Chr19:25721379_25722171_+(Cacna1a);circRNA_4700|Chr4:67399951_67412670_-(Braf);	rno04730
rno04740	Olfactory transduction	Organismal Systems	Sensory system	3	228	20	2681	0.238814	0.527427	1.76382	circRNA_5502|Chr6:4259110_4315062_-(Slc8a1);circRNA_5503|Chr6:4278307_4315062_-(Slc8a1);circRNA_5504|Chr6:4298605_4315062_-(Slc8a1);	rno04740
rno04742	Taste transduction	Organismal Systems	Sensory system	2	228	8	2681	0.143446	0.399217	2.93969	circRNA_3140|Chr19:25721379_25722171_+(Cacna1a);circRNA_4864|Chr4:151118221_151124504_-(Cacna1c);	rno04742
rno04750	Inflammatory mediator regulation of TRP channels	Organismal Systems	Sensory system	10	228	52	2681	0.0105545	0.136045	2.2613	circRNA_0419|Chr1:192379875_192409606_+(Prkcb);circRNA_1236|Chr10:96264760_96266403_-(Prkca);circRNA_1397|Chr11:68722906_68725314_-(Adcy5);circRNA_1399|Chr11:68745884_68750272_-(Adcy5);circRNA_1762|Chr13:67141798_67143114_-(Pla2g4a);circRNA_2143|Chr14:87328008_87377952_+(Adcy1);circRNA_2144|Chr14:87331763_87357732_+(Adcy1);circRNA_2145|Chr14:87350088_87357732_+(Adcy1);circRNA_5562|Chr6:23554728_2…	rno04750
rno04810	Regulation of actin cytoskeleton	Cellular Processes	Cell motility	17	228	174	2681	0.307004	0.570835	1.14885	circRNA_0271|Chr1:142556681_142565170_-(Iqgap1);circRNA_0451|Chr1:200671013_200672411_-(Fgfr2);circRNA_2158|Chr14:100058305_100066787_+(Egfr);circRNA_2588|Chr16:83050847_83058847_-(Arhgef7);circRNA_3428|Chr2:47182739_47203913_-(Itga1);circRNA_4700|Chr4:67399951_67412670_-(Braf);circRNA_5562|Chr6:23554728_23563843_-(Ppp1cb);circRNA_5722|Chr6:91933750_91961861_-(Sos2);circRNA_5754|Chr6:103389817_10…	rno04810
rno04910	Insulin signaling pathway	Organismal Systems	Endocrine system	10	228	100	2681	0.343046	0.605459	1.17588	circRNA_0696|Chr1:259412482_259459540_-(Sorbs1);circRNA_0715|Chr1:259479327_259488326_-(Sorbs1);circRNA_1368|Chr11:51049296_51068978_-(Cblb);circRNA_1858|Chr13:95167819_95196402_-(Akt3);circRNA_1859|Chr13:95167819_95208329_-(Akt3);circRNA_3133|Chr19:22177001_22179584_-(Phkb);circRNA_4518|Chr4:6866069_6869642_+(Rheb);circRNA_4700|Chr4:67399951_67412670_-(Braf);circRNA_5562|Chr6:23554728_23563843_-…	rno04910
rno04911	Insulin secretion	Organismal Systems	Endocrine system	9	228	56	2681	0.0439593	0.271499	1.8898	circRNA_0419|Chr1:192379875_192409606_+(Prkcb);circRNA_1236|Chr10:96264760_96266403_-(Prkca);circRNA_1397|Chr11:68722906_68725314_-(Adcy5);circRNA_1399|Chr11:68745884_68750272_-(Adcy5);circRNA_2143|Chr14:87328008_87377952_+(Adcy1);circRNA_2144|Chr14:87331763_87357732_+(Adcy1);circRNA_2145|Chr14:87350088_87357732_+(Adcy1);circRNA_4864|Chr4:151118221_151124504_-(Cacna1c);circRNA_6597|Chr8:104192886…	rno04911
rno04912	GnRH signaling pathway	Organismal Systems	Endocrine system	14	228	83	2681	0.00895616	0.136045	1.98341	circRNA_0419|Chr1:192379875_192409606_+(Prkcb);circRNA_1212|Chr10:94292693_94314584_+(Map3k3);circRNA_1236|Chr10:96264760_96266403_-(Prkca);circRNA_1397|Chr11:68722906_68725314_-(Adcy5);circRNA_1399|Chr11:68745884_68750272_-(Adcy5);circRNA_1762|Chr13:67141798_67143114_-(Pla2g4a);circRNA_2143|Chr14:87328008_87377952_+(Adcy1);circRNA_2144|Chr14:87331763_87357732_+(Adcy1);circRNA_2145|Chr14:87350088…	rno04912
rno04913	Ovarian Steroidogenesis	Organismal Systems	Endocrine system	6	228	19	2681	0.00373136	0.11934	3.7133	circRNA_1397|Chr11:68722906_68725314_-(Adcy5);circRNA_1399|Chr11:68745884_68750272_-(Adcy5);circRNA_1762|Chr13:67141798_67143114_-(Pla2g4a);circRNA_2143|Chr14:87328008_87377952_+(Adcy1);circRNA_2144|Chr14:87331763_87357732_+(Adcy1);circRNA_2145|Chr14:87350088_87357732_+(Adcy1);	rno04913
rno04914	Progesterone-mediated oocyte maturation	Organismal Systems	Endocrine system	11	228	59	2681	0.00944106	0.136045	2.19231	circRNA_0661|Chr1:255685048_255694514_-(Cpeb3);circRNA_0663|Chr1:255727112_255764689_-(Cpeb3);circRNA_1397|Chr11:68722906_68725314_-(Adcy5);circRNA_1399|Chr11:68745884_68750272_-(Adcy5);circRNA_1858|Chr13:95167819_95196402_-(Akt3);circRNA_1859|Chr13:95167819_95208329_-(Akt3);circRNA_2143|Chr14:87328008_87377952_+(Adcy1);circRNA_2144|Chr14:87331763_87357732_+(Adcy1);circRNA_2145|Chr14:87350088_873…	rno04914
rno04915	Estrogen signaling pathway	Organismal Systems	Endocrine system	9	228	67	2681	0.110867	0.376949	1.57954	circRNA_1397|Chr11:68722906_68725314_-(Adcy5);circRNA_1399|Chr11:68745884_68750272_-(Adcy5);circRNA_1858|Chr13:95167819_95196402_-(Akt3);circRNA_1859|Chr13:95167819_95208329_-(Akt3);circRNA_2143|Chr14:87328008_87377952_+(Adcy1);circRNA_2144|Chr14:87331763_87357732_+(Adcy1);circRNA_2145|Chr14:87350088_87357732_+(Adcy1);circRNA_2158|Chr14:100058305_100066787_+(Egfr);circRNA_5722|Chr6:91933750_91961…	rno04915
rno04916	Melanogenesis	Organismal Systems	Endocrine system	7	228	48	2681	0.108081	0.376949	1.71482	circRNA_0419|Chr1:192379875_192409606_+(Prkcb);circRNA_1236|Chr10:96264760_96266403_-(Prkca);circRNA_1397|Chr11:68722906_68725314_-(Adcy5);circRNA_1399|Chr11:68745884_68750272_-(Adcy5);circRNA_2143|Chr14:87328008_87377952_+(Adcy1);circRNA_2144|Chr14:87331763_87357732_+(Adcy1);circRNA_2145|Chr14:87350088_87357732_+(Adcy1);	rno04916
rno04917	Prolactin signaling pathway	Organismal Systems	Endocrine system	6	228	33	2681	0.0559789	0.291014	2.13796	circRNA_1168|Chr10:85313576_85314836_+(Socs7);circRNA_1858|Chr13:95167819_95196402_-(Akt3);circRNA_1859|Chr13:95167819_95208329_-(Akt3);circRNA_3818|Chr2:240854068_240861760_-(Nfkb1);circRNA_5722|Chr6:91933750_91961861_-(Sos2);circRNA_6215|Chr7:130113212_130116591_-(Mapk12);	rno04917
rno04918	Thyroid hormone synthesis	Organismal Systems	Endocrine system	8	228	46	2681	0.0372183	0.246055	2.045	circRNA_0419|Chr1:192379875_192409606_+(Prkcb);circRNA_1236|Chr10:96264760_96266403_-(Prkca);circRNA_1397|Chr11:68722906_68725314_-(Adcy5);circRNA_1399|Chr11:68745884_68750272_-(Adcy5);circRNA_2143|Chr14:87328008_87377952_+(Adcy1);circRNA_2144|Chr14:87331763_87357732_+(Adcy1);circRNA_2145|Chr14:87350088_87357732_+(Adcy1);circRNA_6597|Chr8:104192886_104202285_-(Atp1b3);	rno04918
rno04919	Thyroid hormone signaling pathway	Organismal Systems	Endocrine system	6	228	88	2681	0.773381	0.864153	0.801734	circRNA_0419|Chr1:192379875_192409606_+(Prkcb);circRNA_1236|Chr10:96264760_96266403_-(Prkca);circRNA_1858|Chr13:95167819_95196402_-(Akt3);circRNA_1859|Chr13:95167819_95208329_-(Akt3);circRNA_4518|Chr4:6866069_6869642_+(Rheb);circRNA_6597|Chr8:104192886_104202285_-(Atp1b3);	rno04919
rno04920	Adipocytokine signaling pathway	Organismal Systems	Endocrine system	4	228	30	2681	0.248201	0.527427	1.56784	circRNA_1858|Chr13:95167819_95196402_-(Akt3);circRNA_1859|Chr13:95167819_95208329_-(Akt3);circRNA_3818|Chr2:240854068_240861760_-(Nfkb1);circRNA_5249|Chr5:120609027_120616745_+(Lepr);	rno04920
[truncated: 84 more rows]
