# Supplementary material for: Expression profiles of circular RNAs and interaction networks of competing endogenous RNAs in neurogenic bladder of rats following suprasacral spinal cord injury
Source: PeerJ. 2023 Sep 18;11:e16042. doi: 10.7717/peerj.16042 (PMC10512963; doi:10.7717/peerj.16042)
Supplement: Supplemental Information 16 [file peerj-11-16042-s016.xlsx]

## Sheet: up-regulated (SSCI–1 vs. sham)
id	Term	Category	GO_classify2	ListHits	ListTotal	PopHits	PopTotal	p-value	q-value	Enrichment_score	Gene
GO:0000002	mitochondrial genome maintenance	biological_process	cellular component organization or biogenesis|cellular process	1	371	12	6672	0.496977	0.810254	1.49865	circRNA_0233|Chr1:128239552_128243030_-
GO:0000049	tRNA binding	molecular_function	binding	1	371	16	6672	0.60006	0.842385	1.12399	circRNA_4808|Chr4:120295643_120298656_-
GO:0000062	fatty-acyl-CoA binding	molecular_function	binding	1	371	18	6672	0.643406	0.848633	0.999102	circRNA_1794|Chr13:73255237_73265813_+
GO:0000070	mitotic sister chromatid segregation	biological_process	cellular component organization or biogenesis|cellular process	1	371	5	6672	0.248846	0.807299	3.59677	circRNA_1188|Chr10:89036545_89074755_+
GO:0000077	DNA damage checkpoint	biological_process	biological regulation|cellular process|negative regulation of biological process|regulation of biological process|response to stimulus	1	371	15	6672	0.576456	0.832613	1.19892	circRNA_4183|Chr3:59075644_59085278_+
GO:0000082	G1/S transition of mitotic cell cycle	biological_process	cellular process	1	371	49	6672	0.940022	0.974468	0.367017	circRNA_3283|Chr19:61714402_61714542_+
GO:0000118	histone deacetylase complex	cellular_component	cell|cell part|macromolecular complex|membrane-enclosed lumen|organelle|organelle part	2	371	43	6672	0.699251	0.864628	0.836457	circRNA_0933|Chr10:43227922_43229953_+;circRNA_5450|Chr5:167486001_167547741_+
GO:0000122	negative regulation of transcription by RNA polymerase II	biological_process	biological regulation|cellular process|metabolic process|negative regulation of biological process|regulation of biological process	24	371	434	6672	0.543552	0.825583	0.994497	circRNA_0233|Chr1:128239552_128243030_-;circRNA_2982|Chr18:49891333_49891588_-;circRNA_4186|Chr3:59678949_59680308_-;circRNA_4697|Chr4:66567829_66568912_-;circRNA_3225|Chr19:42917629_42920390_-;circRNA_3268|Chr19:56187917_56188816_+;circRNA_0447|Chr1:200606971_200615170_-;circRNA_3458|Chr2:57539193_57544062_-;circRNA_5617|Chr6:41822551_41830656_-;circRNA_1231|Chr10:95327724_95328546_-;circRNA_018…
GO:0000139	Golgi membrane	cellular_component	cell|cell part|membrane|organelle|organelle part	10	371	194	6672	0.64473	0.849833	0.927001	circRNA_4403|Chr3:145092634_145129362_+;circRNA_4402|Chr3:145092634_145098350_+;circRNA_3620|Chr2:183555214_183558410_-;circRNA_2177|Chr14:107594175_107594869_-;circRNA_5962|Chr7:29284390_29288495_+;circRNA_3514|Chr2:113744312_113745181_+;circRNA_3899|Chr20:6883690_6884511_+;circRNA_1983|Chr14:17407714_17408515_-;circRNA_3792|Chr2:230311167_230317038_-;circRNA_6658|Chr8:118616528_118620855_+
GO:0000149	SNARE binding	molecular_function	binding	1	371	51	6672	0.946554	0.974936	0.352624	circRNA_0290|Chr1:154405931_154425509_+
GO:0000151	ubiquitin ligase complex	cellular_component	cell|cell part|macromolecular complex	5	371	73	6672	0.383013	0.807299	1.23177	circRNA_2943|Chr18:31445709_31446694_-;circRNA_6407|Chr8:64171150_64184113_-;circRNA_0073|Chr1:28362167_28375861_+;circRNA_6742|Chr9:16036525_16039832_+;circRNA_2278|Chr15:36934315_36940208_+
GO:0000164	protein phosphatase type 1 complex	cellular_component	cell|cell part|macromolecular complex	2	371	7	6672	0.0537688	0.612665	5.13824	circRNA_0763|Chr1:274700623_274701534_+;circRNA_0761|Chr1:274688579_274718538_+
GO:0000165	MAPK cascade	biological_process	biological regulation|cellular process|metabolic process|regulation of biological process|response to stimulus|signaling	6	371	93	6672	0.415038	0.807299	1.16025	circRNA_6219|Chr7:130522030_130524289_+;circRNA_0233|Chr1:128239552_128243030_-;circRNA_7179|ChrX:109996163_110063748_+;circRNA_0038|Chr1:15545013_15551204_+;circRNA_2562|Chr16:63915078_63933482_+;circRNA_3152|Chr19:32214551_32215127_+
GO:0000184	nuclear-transcribed mRNA catabolic process, nonsense-mediated decay	biological_process	biological regulation|cellular process|metabolic process|negative regulation of biological process|regulation of biological process	2	371	14	6672	0.180962	0.807299	2.56912	circRNA_2766|Chr17:76245627_76265943_-;circRNA_2768|Chr17:76260636_76265943_-
GO:0000186	activation of MAPKK activity	biological_process	biological regulation|cellular process|metabolic process|positive regulation of biological process|regulation of biological process|response to stimulus|signaling	2	371	48	6672	0.755547	0.888553	0.749326	circRNA_4183|Chr3:59075644_59085278_+;circRNA_0038|Chr1:15545013_15551204_+
GO:0000187	activation of MAPK activity	biological_process	biological regulation|cellular process|metabolic process|positive regulation of biological process|regulation of biological process|response to stimulus|signaling	2	371	66	6672	0.889237	0.948921	0.544964	circRNA_0038|Chr1:15545013_15551204_+;circRNA_2562|Chr16:63915078_63933482_+
GO:0000209	protein polyubiquitination	biological_process	cellular process|metabolic process	5	371	104	6672	0.694163	0.864628	0.864607	circRNA_6107|Chr7:76837537_76845975_-;circRNA_2943|Chr18:31445709_31446694_-;circRNA_6407|Chr8:64171150_64184113_-;circRNA_0073|Chr1:28362167_28375861_+;circRNA_3216|Chr19:39543248_39545672_+
GO:0000226	microtubule cytoskeleton organization	biological_process	cellular component organization or biogenesis|cellular process	3	371	105	6672	0.937182	0.974232	0.513824	circRNA_1188|Chr10:89036545_89074755_+;circRNA_2865|Chr18:6047215_6051719_-;circRNA_5232|Chr5:117620103_117623151_-
GO:0000228	nuclear chromosome	cellular_component	cell|cell part|membrane-enclosed lumen|organelle|organelle part	2	371	13	6672	0.160722	0.807299	2.76674	circRNA_5526|Chr6:11219826_11221789_-;circRNA_4448|Chr3:156690910_156699465_+
GO:0000242	pericentriolar material	cellular_component	cell|cell part|organelle|organelle part	1	371	20	6672	0.682064	0.858756	0.899191	circRNA_1188|Chr10:89036545_89074755_+
GO:0000266	mitochondrial fission	biological_process	cellular component organization or biogenesis|cellular process	1	371	9	6672	0.402631	0.807299	1.9982	circRNA_5617|Chr6:41822551_41830656_-
GO:0000278	mitotic cell cycle	biological_process	cellular process	5	371	78	6672	0.438913	0.807299	1.15281	circRNA_1188|Chr10:89036545_89074755_+;circRNA_2259|Chr15:24024429_24032402_-;circRNA_6001|Chr7:51425330_51432888_-;circRNA_4750|Chr4:96739878_96745521_+;circRNA_4753|Chr4:96744220_96767151_+
GO:0000281	mitotic cytokinesis	biological_process	cellular process	1	371	20	6672	0.682064	0.858756	0.899191	circRNA_1255|Chr10:106264856_106265494_+
GO:0000285	1-phosphatidylinositol-3-phosphate 5-kinase activity	molecular_function	catalytic activity	2	371	9	6672	0.0856728	0.732146	3.99641	circRNA_6919|Chr9:71920586_71955010_+;circRNA_6917|Chr9:71915420_71927987_+
GO:0000287	magnesium ion binding	molecular_function	binding	10	371	152	6672	0.337776	0.807299	1.18315	circRNA_4183|Chr3:59075644_59085278_+;circRNA_0613|Chr1:242716557_242737019_-;circRNA_1272|Chr10:110495072_110500097_+;circRNA_0038|Chr1:15545013_15551204_+;circRNA_5806|Chr6:124625936_124680274_-;circRNA_5526|Chr6:11219826_11221789_-;circRNA_0647|Chr1:251455609_251485480_+;circRNA_3080|Chr18:77484239_77520779_-;circRNA_3074|Chr18:77466020_77520779_-;circRNA_0609|Chr1:242607845_242631822_-
GO:0000289	nuclear-transcribed mRNA poly(A) tail shortening	biological_process	biological regulation|cellular process|metabolic process|negative regulation of biological process|regulation of biological process	1	371	29	6672	0.810378	0.91232	0.620132	circRNA_2258|Chr15:23840157_23853169_+
GO:0000339	RNA cap binding	molecular_function	binding	1	371	7	6672	0.330125	0.807299	2.56912	circRNA_5413|Chr5:156506448_156517254_+
GO:0000380	alternative mRNA splicing, via spliceosome	biological_process	cellular process|metabolic process	1	371	15	6672	0.576456	0.832613	1.19892	circRNA_3581|Chr2:150755405_150756431_+
GO:0000381	regulation of alternative mRNA splicing, via spliceosome	biological_process	biological regulation|cellular process|metabolic process|regulation of biological process	7	371	24	6672	0.000235631	0.12082	5.24528	circRNA_0544|Chr1:220039308_220042767_-;circRNA_2410|Chr15:105687771_105688392_+;circRNA_1346|Chr11:34865447_34879143_+;circRNA_0547|Chr1:220042074_220049075_-;circRNA_1349|Chr11:34879058_34932316_+;circRNA_3581|Chr2:150755405_150756431_+;circRNA_0543|Chr1:220039308_220040146_-
GO:0000398	mRNA splicing, via spliceosome	biological_process	cellular process|metabolic process	3	371	34	6672	0.292687	0.807299	1.58681	circRNA_4009|Chr20:48555348_48561987_+;circRNA_6291|Chr8:21663861_21664122_+;circRNA_4735|Chr4:87017858_87018778_-
GO:0000400	four-way junction DNA binding	molecular_function	binding	2	371	9	6672	0.0856728	0.732146	3.99641	circRNA_5752|Chr6:102510293_102512499_+;circRNA_5526|Chr6:11219826_11221789_-
GO:0000403	Y-form DNA binding	molecular_function	binding	1	371	7	6672	0.330125	0.807299	2.56912	circRNA_5526|Chr6:11219826_11221789_-
GO:0000462	maturation of SSU-rRNA from tricistronic rRNA transcript (SSU-rRNA, 5.8S rRNA, LSU-rRNA)	biological_process	cellular component organization or biogenesis|cellular process|metabolic process	1	371	9	6672	0.402631	0.807299	1.9982	circRNA_5775|Chr6:108797786_108802113_+
GO:0000724	double-strand break repair via homologous recombination	biological_process	cellular process|metabolic process|response to stimulus	1	371	23	6672	0.732356	0.878053	0.781906	circRNA_5752|Chr6:102510293_102512499_+
GO:0000775	chromosome, centromeric region	cellular_component	cell|cell part|organelle|organelle part	1	371	9	6672	0.402631	0.807299	1.9982	circRNA_2259|Chr15:24024429_24032402_-
GO:0000776	kinetochore	cellular_component	cell|cell part|macromolecular complex|organelle|organelle part	2	371	42	6672	0.686781	0.860995	0.856373	circRNA_6443|Chr8:69105017_69107012_-;circRNA_6001|Chr7:51425330_51432888_-
GO:0000785	chromatin	cellular_component	cell|cell part|organelle|organelle part	5	371	100	6672	0.660479	0.852917	0.899191	circRNA_3458|Chr2:57539193_57544062_-;circRNA_1551|Chr12:13879069_13884323_+;circRNA_3944|Chr20:22822066_22856689_-;circRNA_6742|Chr9:16036525_16039832_+;circRNA_2472|Chr16:8396763_8400882_+
GO:0000790	nuclear chromatin	cellular_component	cell|cell part|membrane-enclosed lumen|organelle|organelle part	6	371	144	6672	0.820189	0.913126	0.749326	circRNA_7114|ChrX:35344847_35352097_-;circRNA_0233|Chr1:128239552_128243030_-;circRNA_1231|Chr10:95327724_95328546_-;circRNA_6753|Chr9:18653895_18660843_+;circRNA_5163|Chr5:90817794_90827570_+;circRNA_3057|Chr18:72593000_72595275_+
GO:0000812	Swr1 complex	cellular_component	cell|cell part|macromolecular complex|membrane-enclosed lumen|organelle|organelle part	1	371	5	6672	0.248846	0.807299	3.59677	circRNA_1679|Chr12:51960260_51961629_+
GO:0000902	cell morphogenesis	biological_process	cellular component organization or biogenesis|cellular process|developmental process	5	371	66	6672	0.304706	0.807299	1.36241	circRNA_2865|Chr18:6047215_6051719_-;circRNA_5414|Chr5:157690578_157712883_+;circRNA_2562|Chr16:63915078_63933482_+;circRNA_4413|Chr3:148837814_148842440_+;circRNA_4416|Chr3:148837814_148862118_+
GO:0000910	cytokinesis	biological_process	NA	1	371	14	6672	0.551462	0.825583	1.28456	circRNA_3367|Chr2:30384653_30433774_-
GO:0000922	spindle pole	cellular_component	cell|cell part|organelle|organelle part	2	371	42	6672	0.686781	0.860995	0.856373	circRNA_4139|Chr3:45365578_45372679_+;circRNA_5003|Chr5:8794167_8810643_-
GO:0000930	gamma-tubulin complex	cellular_component	cell|cell part|macromolecular complex|organelle|organelle part	1	371	6	6672	0.290646	0.807299	2.9973	circRNA_1188|Chr10:89036545_89074755_+
GO:0000932	P-body	cellular_component	cell|cell part|macromolecular complex|organelle	3	371	50	6672	0.531861	0.825583	1.07903	circRNA_2258|Chr15:23840157_23853169_+;circRNA_5386|Chr5:150382262_150383814_-;circRNA_4448|Chr3:156690910_156699465_+
GO:0000956	nuclear-transcribed mRNA catabolic process	biological_process	biological regulation|cellular process|metabolic process|negative regulation of biological process|regulation of biological process	1	371	12	6672	0.496977	0.810254	1.49865	circRNA_4735|Chr4:87017858_87018778_-
GO:0000976	transcription regulatory region sequence-specific DNA binding	molecular_function	binding	3	371	40	6672	0.385587	0.807299	1.34879	circRNA_0233|Chr1:128239552_128243030_-;circRNA_1551|Chr12:13879069_13884323_+;circRNA_3944|Chr20:22822066_22856689_-
GO:0000977	RNA polymerase II regulatory region sequence-specific DNA binding	molecular_function	binding	5	371	145	6672	0.912618	0.96244	0.620132	circRNA_0233|Chr1:128239552_128243030_-;circRNA_4669|Chr4:64894605_64899587_-;circRNA_4186|Chr3:59678949_59680308_-;circRNA_1897|Chr13:106507146_106507561_+;circRNA_2849|Chr18:2445774_2446986_+
GO:0000978	RNA polymerase II proximal promoter sequence-specific DNA binding	molecular_function	binding	21	371	214	6672	0.00769409	0.293409	1.76477	circRNA_0233|Chr1:128239552_128243030_-;circRNA_4669|Chr4:64894605_64899587_-;circRNA_4186|Chr3:59678949_59680308_-;circRNA_6915|Chr9:70787138_70787910_-;circRNA_3225|Chr19:42917629_42920390_-;circRNA_1272|Chr10:110495072_110500097_+;circRNA_3203|Chr19:38057557_38062193_+;circRNA_0185|Chr1:93851663_93853240_-;circRNA_0375|Chr1:177651557_177654228_+;circRNA_6753|Chr9:18653895_18660843_+;circRNA_23…
GO:0000981	RNA polymerase II transcription factor activity, sequence-specific DNA binding	molecular_function	NA	9	371	98	6672	0.0937502	0.778773	1.65158	circRNA_0233|Chr1:128239552_128243030_-;circRNA_4186|Chr3:59678949_59680308_-;circRNA_1272|Chr10:110495072_110500097_+;circRNA_5150|Chr5:76925720_76926914_+;circRNA_2284|Chr15:37190896_37218085_+;circRNA_6753|Chr9:18653895_18660843_+;circRNA_2372|Chr15:61826710_61827008_+;circRNA_4829|Chr4:131439626_131453028_-;circRNA_2849|Chr18:2445774_2446986_+
GO:0000982	transcription factor activity, RNA polymerase II proximal promoter sequence-specific DNA binding	molecular_function	NA	2	371	13	6672	0.160722	0.807299	2.76674	circRNA_0233|Chr1:128239552_128243030_-;circRNA_0375|Chr1:177651557_177654228_+
GO:0000987	proximal promoter sequence-specific DNA binding	molecular_function	binding	4	371	34	6672	0.117679	0.807299	2.11574	circRNA_3087|Chr18:79813606_79815529_+;circRNA_4186|Chr3:59678949_59680308_-;circRNA_3203|Chr19:38057557_38062193_+;circRNA_0375|Chr1:177651557_177654228_+
GO:0001046	core promoter sequence-specific DNA binding	molecular_function	binding	3	371	42	6672	0.416079	0.807299	1.28456	circRNA_3225|Chr19:42917629_42920390_-;circRNA_4448|Chr3:156690910_156699465_+;circRNA_3223|Chr19:42856166_42920390_-
GO:0001077	transcriptional activator activity, RNA polymerase II proximal promoter sequence-specific DNA binding	molecular_function	NA	10	371	117	6672	0.115015	0.807299	1.53708	circRNA_0233|Chr1:128239552_128243030_-;circRNA_4669|Chr4:64894605_64899587_-;circRNA_6915|Chr9:70787138_70787910_-;circRNA_1272|Chr10:110495072_110500097_+;circRNA_3203|Chr19:38057557_38062193_+;circRNA_0375|Chr1:177651557_177654228_+;circRNA_6753|Chr9:18653895_18660843_+;circRNA_2372|Chr15:61826710_61827008_+;circRNA_3152|Chr19:32214551_32215127_+;circRNA_3057|Chr18:72593000_72595275_+
GO:0001078	transcriptional repressor activity, RNA polymerase II proximal promoter sequence-specific DNA binding	molecular_function	NA	6	371	85	6672	0.334353	0.807299	1.26945	circRNA_4186|Chr3:59678949_59680308_-;circRNA_0185|Chr1:93851663_93853240_-;circRNA_5778|Chr6:108862383_108883917_+;circRNA_4750|Chr4:96739878_96745521_+;circRNA_4937|Chr4:174810962_174816343_+;circRNA_4753|Chr4:96744220_96767151_+
GO:0001085	RNA polymerase II transcription factor binding	molecular_function	binding	6	371	66	6672	0.159185	0.807299	1.63489	circRNA_0233|Chr1:128239552_128243030_-;circRNA_5617|Chr6:41822551_41830656_-;circRNA_0375|Chr1:177651557_177654228_+;circRNA_3216|Chr19:39543248_39545672_+;circRNA_5450|Chr5:167486001_167547741_+;circRNA_2849|Chr18:2445774_2446986_+
GO:0001102	RNA polymerase II activating transcription factor binding	molecular_function	binding	2	371	28	6672	0.466633	0.807299	1.28456	circRNA_0233|Chr1:128239552_128243030_-;circRNA_4697|Chr4:66567829_66568912_-
GO:0001103	RNA polymerase II repressing transcription factor binding	molecular_function	binding	1	371	18	6672	0.643406	0.848633	0.999102	circRNA_2849|Chr18:2445774_2446986_+
GO:0001104	RNA polymerase II transcription cofactor activity	molecular_function	NA	1	371	21	6672	0.699797	0.864628	0.856373	circRNA_1658|Chr12:43576497_43576734_-
GO:0001105	RNA polymerase II transcription coactivator activity	molecular_function	NA	3	371	45	6672	0.460835	0.807299	1.19892	circRNA_0233|Chr1:128239552_128243030_-;circRNA_4697|Chr4:66567829_66568912_-;circRNA_5450|Chr5:167486001_167547741_+
GO:0001106	RNA polymerase II transcription corepressor activity	molecular_function	NA	1	371	32	6672	0.840411	0.919804	0.561995	circRNA_5450|Chr5:167486001_167547741_+
GO:0001158	enhancer sequence-specific DNA binding	molecular_function	binding	1	371	7	6672	0.330125	0.807299	2.56912	circRNA_2849|Chr18:2445774_2446986_+
GO:0001190	transcriptional activator activity, RNA polymerase II transcription factor binding	molecular_function	NA	1	371	9	6672	0.402631	0.807299	1.9982	circRNA_3216|Chr19:39543248_39545672_+
GO:0001205	transcriptional activator activity, RNA polymerase II distal enhancer sequence-specific DNA binding	molecular_function	NA	1	371	13	6672	0.524998	0.816973	1.38337	circRNA_0233|Chr1:128239552_128243030_-
GO:0001223	transcription coactivator binding	molecular_function	binding	1	371	9	6672	0.402631	0.807299	1.9982	circRNA_0375|Chr1:177651557_177654228_+
GO:0001227	transcriptional repressor activity, RNA polymerase II transcription regulatory region sequence-specific DNA binding	molecular_function	NA	1	371	23	6672	0.732356	0.878053	0.781906	circRNA_3203|Chr19:38057557_38062193_+
GO:0001228	transcriptional activator activity, RNA polymerase II transcription regulatory region sequence-specific DNA binding	molecular_function	NA	5	371	96	6672	0.624503	0.848633	0.936658	circRNA_4669|Chr4:64894605_64899587_-;circRNA_3203|Chr19:38057557_38062193_+;circRNA_1897|Chr13:106507146_106507561_+;circRNA_6103|Chr7:76114791_76119201_+;circRNA_2849|Chr18:2445774_2446986_+
GO:0001501	skeletal system development	biological_process	developmental process|multicellular organismal process	9	371	72	6672	0.0175946	0.452017	2.24798	circRNA_6828|Chr9:52047552_52048745_+;circRNA_6830|Chr9:52048089_52048881_+;circRNA_4330|Chr3:117726599_117728604_-;circRNA_1147|Chr10:82752455_82752793_+;circRNA_6827|Chr9:52047552_52047844_+;circRNA_0591|Chr1:233578229_233581182_+;circRNA_6825|Chr9:52043678_52045132_+;circRNA_6753|Chr9:18653895_18660843_+;circRNA_3663|Chr2:188308301_188309036_+
GO:0001502	cartilage condensation	biological_process	developmental process|multicellular organismal process	1	371	8	6672	0.367413	0.807299	2.24798	circRNA_0857|Chr10:13944932_13945211_+
GO:0001503	ossification	biological_process	multicellular organismal process	4	371	44	6672	0.227184	0.807299	1.63489	circRNA_6937|Chr9:78945266_78947892_-;circRNA_4186|Chr3:59678949_59680308_-;circRNA_1147|Chr10:82752455_82752793_+;circRNA_6935|Chr9:78911759_78911926_+
GO:0001508	action potential	biological_process	biological regulation	1	371	7	6672	0.330125	0.807299	2.56912	circRNA_0591|Chr1:233578229_233581182_+
GO:0001514	selenocysteine incorporation	biological_process	biological regulation|cellular process|metabolic process|regulation of biological process	1	371	5	6672	0.248846	0.807299	3.59677	circRNA_4808|Chr4:120295643_120298656_-
GO:0001525	angiogenesis	biological_process	developmental process|multicellular organismal process	4	371	88	6672	0.729411	0.878053	0.817447	circRNA_6937|Chr9:78945266_78947892_-;circRNA_6935|Chr9:78911759_78911926_+;circRNA_0447|Chr1:200606971_200615170_-;circRNA_0647|Chr1:251455609_251485480_+
GO:0001527	microfibril	cellular_component	extracellular matrix|extracellular matrix part|extracellular region|extracellular region part	1	371	13	6672	0.524998	0.816973	1.38337	circRNA_4330|Chr3:117726599_117728604_-
GO:0001540	amyloid-beta binding	molecular_function	binding	2	371	40	6672	0.660573	0.852917	0.899191	circRNA_5227|Chr5:117024123_117030956_-;circRNA_2034|Chr14:43420836_43461320_+
GO:0001556	oocyte maturation	biological_process	cellular process|developmental process|multicellular organismal process|multi-organism process|reproduction|reproductive process	1	371	8	6672	0.367413	0.807299	2.24798	circRNA_5386|Chr5:150382262_150383814_-
GO:0001568	blood vessel development	biological_process	developmental process|multicellular organismal process	8	371	71	6672	0.0422676	0.581817	2.02635	circRNA_6828|Chr9:52047552_52048745_+;circRNA_4051|Chr3:6464953_6472752_+;circRNA_6830|Chr9:52048089_52048881_+;circRNA_1147|Chr10:82752455_82752793_+;circRNA_6827|Chr9:52047552_52047844_+;circRNA_6825|Chr9:52043678_52045132_+;circRNA_2847|Chr18:2018381_2018553_-;circRNA_0857|Chr10:13944932_13945211_+
GO:0001569	branching involved in blood vessel morphogenesis	biological_process	developmental process|multicellular organismal process	1	371	25	6672	0.761393	0.889503	0.719353	circRNA_3203|Chr19:38057557_38062193_+
GO:0001570	vasculogenesis	biological_process	cellular process|developmental process|multicellular organismal process	2	371	41	6672	0.67389	0.858756	0.87726	circRNA_3621|Chr2:184309074_184309661_-;circRNA_4508|Chr4:3972586_3976284_+
GO:0001649	osteoblast differentiation	biological_process	cellular process|developmental process|multicellular organismal process	2	371	49	6672	0.765653	0.892754	0.734034	circRNA_1147|Chr10:82752455_82752793_+;circRNA_6753|Chr9:18653895_18660843_+
GO:0001650	fibrillar center	cellular_component	cell|cell part|membrane-enclosed lumen|organelle|organelle part	4	371	94	6672	0.775498	0.894571	0.765269	circRNA_2258|Chr15:23840157_23853169_+;circRNA_4448|Chr3:156690910_156699465_+;circRNA_1983|Chr14:17407714_17408515_-;circRNA_0921|Chr10:38712831_38720071_+
GO:0001656	metanephros development	biological_process	developmental process|multicellular organismal process	1	371	24	6672	0.74729	0.883396	0.749326	circRNA_4330|Chr3:117726599_117728604_-
GO:0001657	ureteric bud development	biological_process	developmental process|multicellular organismal process	4	371	32	6672	0.0993042	0.787414	2.24798	circRNA_0447|Chr1:200606971_200615170_-;circRNA_6311|Chr8:24427222_24434916_+;circRNA_3152|Chr19:32214551_32215127_+;circRNA_3057|Chr18:72593000_72595275_+
GO:0001664	G-protein coupled receptor binding	molecular_function	binding	1	371	23	6672	0.732356	0.878053	0.781906	circRNA_0591|Chr1:233578229_233581182_+
GO:0001666	response to hypoxia	biological_process	response to stimulus	3	371	109	6672	0.946891	0.974936	0.494968	circRNA_3203|Chr19:38057557_38062193_+;circRNA_4948|Chr4:180711145_180722357_-;circRNA_6658|Chr8:118616528_118620855_+
GO:0001669	acrosomal vesicle	cellular_component	cell|cell part|organelle	2	371	39	6672	0.646824	0.849862	0.922248	circRNA_3283|Chr19:61714402_61714542_+;circRNA_5414|Chr5:157690578_157712883_+
GO:0001701	in utero embryonic development	biological_process	developmental process|multicellular organismal process	14	371	184	6672	0.143682	0.807299	1.36833	circRNA_4186|Chr3:59678949_59680308_-;circRNA_3283|Chr19:61714402_61714542_+;circRNA_5752|Chr6:102510293_102512499_+;circRNA_0447|Chr1:200606971_200615170_-;circRNA_6103|Chr7:76114791_76119201_+;circRNA_2847|Chr18:2018381_2018553_-;circRNA_3581|Chr2:150755405_150756431_+;circRNA_5526|Chr6:11219826_11221789_-;circRNA_0857|Chr10:13944932_13945211_+;circRNA_6243|Chr7:140533891_140536242_-;circRNA_48…
GO:0001702	gastrulation with mouth forming second	biological_process	developmental process|multicellular organismal process	1	371	32	6672	0.840411	0.919804	0.561995	circRNA_2054|Chr14:44496991_44498906_+
GO:0001706	endoderm formation	biological_process	developmental process|multicellular organismal process	1	371	11	6672	0.467307	0.807299	1.63489	circRNA_3057|Chr18:72593000_72595275_+
GO:0001707	mesoderm formation	biological_process	developmental process|multicellular organismal process	1	371	28	6672	0.799163	0.907577	0.64228	circRNA_3057|Chr18:72593000_72595275_+
GO:0001708	cell fate specification	biological_process	cellular process|developmental process	1	371	5	6672	0.248846	0.807299	3.59677	circRNA_3283|Chr19:61714402_61714542_+
GO:0001725	stress fiber	cellular_component	cell|cell part|organelle|organelle part	9	371	125	6672	0.259139	0.807299	1.29484	circRNA_1255|Chr10:106264856_106265494_+;circRNA_0613|Chr1:242716557_242737019_-;circRNA_1547|Chr12:13717791_13718009_-;circRNA_1878|Chr13:100347405_100353039_-;circRNA_0649|Chr1:252537818_252539458_-;circRNA_7047|Chr9:119309035_119311107_-;circRNA_0716|Chr1:259479327_259489683_-;circRNA_0650|Chr1:252537894_252539495_+;circRNA_0609|Chr1:242607845_242631822_-
GO:0001736	establishment of planar polarity	biological_process	developmental process	1	371	6	6672	0.290646	0.807299	2.9973	circRNA_4795|Chr4:117422680_117436312_+
GO:0001741	XY body	cellular_component	cell|cell part|organelle	1	371	14	6672	0.551462	0.825583	1.28456	circRNA_7114|ChrX:35344847_35352097_-
GO:0001754	eye photoreceptor cell differentiation	biological_process	cellular process|developmental process|multicellular organismal process	1	371	18	6672	0.643406	0.848633	0.999102	circRNA_2614|Chr17:5511386_5548199_+
GO:0001756	somitogenesis	biological_process	developmental process|multicellular organismal process	1	371	34	6672	0.857748	0.931308	0.528936	circRNA_2847|Chr18:2018381_2018553_-
GO:0001764	neuron migration	biological_process	cellular process|developmental process|localization|locomotion|multicellular organismal process	3	371	92	6672	0.893288	0.950626	0.586429	circRNA_3572|Chr2:144876416_144917472_+;circRNA_1818|Chr13:77863217_77865781_-;circRNA_2034|Chr14:43420836_43461320_+
GO:0001771	immunological synapse formation	biological_process	cellular process|immune system process	1	371	13	6672	0.524998	0.816973	1.38337	circRNA_0617|Chr1:243014234_243018525_+
GO:0001772	immunological synapse	cellular_component	cell|cell part|membrane|membrane part	4	371	15	6672	0.00786812	0.293409	4.79569	circRNA_1267|Chr10:109754906_109755050_+;circRNA_1266|Chr10:109754888_109755050_+;circRNA_1265|Chr10:109754865_109755050_+;circRNA_3686|Chr2:195768840_195795666_-
GO:0001775	cell activation	biological_process	cellular process	2	371	6	6672	0.0398481	0.559784	5.99461	circRNA_6937|Chr9:78945266_78947892_-;circRNA_6935|Chr9:78911759_78911926_+
GO:0001779	natural killer cell differentiation	biological_process	cellular process|developmental process|immune system process|multicellular organismal process	1	371	9	6672	0.402631	0.807299	1.9982	circRNA_4186|Chr3:59678949_59680308_-
GO:0001786	phosphatidylserine binding	molecular_function	binding	1	371	5	6672	0.248846	0.807299	3.59677	circRNA_1249|Chr10:103586432_103677527_-
GO:0001816	cytokine production	biological_process	multicellular organismal process	1	371	15	6672	0.576456	0.832613	1.19892	circRNA_3203|Chr19:38057557_38062193_+
GO:0001817	regulation of cytokine production	biological_process	biological regulation|multicellular organismal process|regulation of biological process	1	371	10	6672	0.435893	0.807299	1.79838	circRNA_2372|Chr15:61826710_61827008_+
GO:0001822	kidney development	biological_process	developmental process|multicellular organismal process	6	371	78	6672	0.265553	0.807299	1.38337	circRNA_4330|Chr3:117726599_117728604_-;circRNA_6772|Chr9:26636334_26669699_-;circRNA_4285|Chr3:104816866_104818862_+;circRNA_3815|Chr2:238742934_238746181_-;circRNA_0857|Chr10:13944932_13945211_+;circRNA_3152|Chr19:32214551_32215127_+
GO:0001825	blastocyst formation	biological_process	developmental process|multicellular organismal process	1	371	14	6672	0.551462	0.825583	1.28456	circRNA_5163|Chr5:90817794_90827570_+
GO:0001829	trophectodermal cell differentiation	biological_process	cellular process|developmental process|multicellular organismal process	1	371	10	6672	0.435893	0.807299	1.79838	circRNA_4186|Chr3:59678949_59680308_-
GO:0001837	epithelial to mesenchymal transition	biological_process	cellular process|developmental process|multicellular organismal process	1	371	19	6672	0.663288	0.852917	0.946517	circRNA_0447|Chr1:200606971_200615170_-
GO:0001841	neural tube formation	biological_process	developmental process|multicellular organismal process	2	371	27	6672	0.447726	0.807299	1.33214	circRNA_2847|Chr18:2018381_2018553_-;circRNA_3930|Chr20:18467660_18474832_-
GO:0001843	neural tube closure	biological_process	developmental process|multicellular organismal process	4	371	57	6672	0.391838	0.807299	1.26202	circRNA_1878|Chr13:100347405_100353039_-;circRNA_6103|Chr7:76114791_76119201_+;circRNA_7065|ChrX:4819220_4832241_-;circRNA_3792|Chr2:230311167_230317038_-
GO:0001889	liver development	biological_process	developmental process|multicellular organismal process	5	371	66	6672	0.304706	0.807299	1.36241	circRNA_2766|Chr17:76245627_76265943_-;circRNA_4186|Chr3:59678949_59680308_-;circRNA_0857|Chr10:13944932_13945211_+;circRNA_2849|Chr18:2445774_2446986_+;circRNA_2768|Chr17:76260636_76265943_-
GO:0001892	embryonic placenta development	biological_process	developmental process|multicellular organismal process|reproduction|reproductive process	3	371	29	6672	0.216635	0.807299	1.8604	circRNA_4186|Chr3:59678949_59680308_-;circRNA_1231|Chr10:95327724_95328546_-;circRNA_0857|Chr10:13944932_13945211_+
GO:0001894	tissue homeostasis	biological_process	biological regulation|multicellular organismal process	1	371	8	6672	0.367413	0.807299	2.24798	circRNA_3283|Chr19:61714402_61714542_+
GO:0001932	regulation of protein phosphorylation	biological_process	biological regulation|cellular process|metabolic process|regulation of biological process	2	371	39	6672	0.646824	0.849862	0.922248	circRNA_6937|Chr9:78945266_78947892_-;circRNA_6935|Chr9:78911759_78911926_+
GO:0001933	negative regulation of protein phosphorylation	biological_process	biological regulation|cellular process|metabolic process|negative regulation of biological process|regulation of biological process	2	371	59	6672	0.848203	0.925104	0.609621	circRNA_6568|Chr8:93334030_93350656_-;circRNA_0647|Chr1:251455609_251485480_+
GO:0001934	positive regulation of protein phosphorylation	biological_process	biological regulation|cellular process|metabolic process|positive regulation of biological process|regulation of biological process	5	371	100	6672	0.660479	0.852917	0.899191	circRNA_4697|Chr4:66567829_66568912_-;circRNA_0038|Chr1:15545013_15551204_+;circRNA_3876|Chr20:4095939_4118506_+;circRNA_1270|Chr10:110157631_110164041_-;circRNA_5413|Chr5:156506448_156517254_+
GO:0001939	female pronucleus	cellular_component	cell|cell part|organelle	2	371	5	6672	0.0275678	0.495978	7.19353	circRNA_4773|Chr4:115104274_115142108_-;circRNA_4771|Chr4:115104274_115106424_-
GO:0001940	male pronucleus	cellular_component	cell|cell part|organelle	2	371	5	6672	0.0275678	0.495978	7.19353	circRNA_4773|Chr4:115104274_115142108_-;circRNA_4771|Chr4:115104274_115106424_-
GO:0001947	heart looping	biological_process	developmental process|multicellular organismal process	1	371	26	6672	0.774711	0.894571	0.691686	circRNA_2847|Chr18:2018381_2018553_-
GO:0001954	positive regulation of cell-matrix adhesion	biological_process	biological adhesion|biological regulation|positive regulation of biological process|regulation of biological process	1	371	24	6672	0.74729	0.883396	0.749326	circRNA_0011|Chr1:6601452_6613874_-
GO:0001957	intramembranous ossification	biological_process	multicellular organismal process	1	371	15	6672	0.576456	0.832613	1.19892	circRNA_1147|Chr10:82752455_82752793_+
GO:0001958	endochondral ossification	biological_process	developmental process|multicellular organismal process	2	371	30	6672	0.503266	0.816973	1.19892	circRNA_1147|Chr10:82752455_82752793_+;circRNA_6753|Chr9:18653895_18660843_+
GO:0001964	startle response	biological_process	multicellular organismal process|response to stimulus	2	371	5	6672	0.0275678	0.495978	7.19353	circRNA_2562|Chr16:63915078_63933482_+;circRNA_5682|Chr6:74325751_74326157_+
GO:0001968	fibronectin binding	molecular_function	binding	1	371	11	6672	0.467307	0.807299	1.63489	circRNA_3283|Chr19:61714402_61714542_+
GO:0001974	blood vessel remodeling	biological_process	multicellular organismal process	2	371	29	6672	0.485151	0.810254	1.24026	circRNA_7247|ChrX:157322637_157323315_+;circRNA_3203|Chr19:38057557_38062193_+
GO:0002020	protease binding	molecular_function	binding	9	371	53	6672	0.00231213	0.256981	3.05386	circRNA_6828|Chr9:52047552_52048745_+;circRNA_6937|Chr9:78945266_78947892_-;circRNA_6830|Chr9:52048089_52048881_+;circRNA_5945|Chr7:23546534_23546690_+;circRNA_1147|Chr10:82752455_82752793_+;circRNA_6827|Chr9:52047552_52047844_+;circRNA_3283|Chr19:61714402_61714542_+;circRNA_6825|Chr9:52043678_52045132_+;circRNA_6935|Chr9:78911759_78911926_+
GO:0002039	p53 binding	molecular_function	binding	2	371	46	6672	0.734208	0.878053	0.781906	circRNA_3257|Chr19:54803498_54815443_+;circRNA_3258|Chr19:54803498_54822499_+
GO:0002042	cell migration involved in sprouting angiogenesis	biological_process	cellular process|developmental process|localization|locomotion|multicellular organismal process	2	371	10	6672	0.103274	0.787414	3.59677	circRNA_3283|Chr19:61714402_61714542_+;circRNA_1288|Chr11:10020678_10022991_+
GO:0002051	osteoblast fate commitment	biological_process	cellular process|developmental process|multicellular organismal process	2	371	5	6672	0.0275678	0.495978	7.19353	circRNA_6753|Chr9:18653895_18660843_+;circRNA_3152|Chr19:32214551_32215127_+
GO:0002053	positive regulation of mesenchymal cell proliferation	biological_process	biological regulation|cellular process|positive regulation of biological process|regulation of biological process	2	371	27	6672	0.447726	0.807299	1.33214	circRNA_0447|Chr1:200606971_200615170_-;circRNA_4829|Chr4:131439626_131453028_-
GO:0002062	chondrocyte differentiation	biological_process	cellular process|developmental process|multicellular organismal process	2	371	24	6672	0.388875	0.807299	1.49865	circRNA_4669|Chr4:64894605_64899587_-;circRNA_6753|Chr9:18653895_18660843_+
GO:0002063	chondrocyte development	biological_process	cellular process|developmental process|multicellular organismal process	2	371	8	6672	0.0691104	0.671779	4.49596	circRNA_0225|Chr1:127025462_127025957_+;circRNA_6753|Chr9:18653895_18660843_+
GO:0002076	osteoblast development	biological_process	cellular process|developmental process|multicellular organismal process	2	371	6	6672	0.0398481	0.559784	5.99461	circRNA_1818|Chr13:77863217_77865781_-;circRNA_6753|Chr9:18653895_18660843_+
GO:0002093	auditory receptor cell morphogenesis	biological_process	cellular component organization or biogenesis|cellular process|developmental process|multicellular organismal process	1	371	5	6672	0.248846	0.807299	3.59677	circRNA_3792|Chr2:230311167_230317038_-
GO:0002095	caveolar macromolecular signaling complex	cellular_component	cell|cell part|macromolecular complex|membrane|membrane part	1	371	6	6672	0.290646	0.807299	2.9973	circRNA_4863|Chr4:151118221_151123637_-
GO:0002102	podosome	cellular_component	cell|cell part|macromolecular complex|organelle|organelle part	1	371	20	6672	0.682064	0.858756	0.899191	circRNA_1547|Chr12:13717791_13718009_-
GO:0002133	polycystin complex	cellular_component	macromolecular complex	1	371	5	6672	0.248846	0.807299	3.59677	circRNA_0857|Chr10:13944932_13945211_+
GO:0002190	cap-independent translational initiation	biological_process	cellular process|metabolic process	3	371	6	6672	0.00300709	0.256981	8.99191	circRNA_0544|Chr1:220039308_220042767_-;circRNA_0547|Chr1:220042074_220049075_-;circRNA_0543|Chr1:220039308_220040146_-
GO:0002192	IRES-dependent translational initiation of linear mRNA	biological_process	cellular process|metabolic process	3	371	7	6672	0.00504645	0.272375	7.70735	circRNA_0544|Chr1:220039308_220042767_-;circRNA_0547|Chr1:220042074_220049075_-;circRNA_0543|Chr1:220039308_220040146_-
GO:0002199	zona pellucida receptor complex	cellular_component	macromolecular complex	1	371	6	6672	0.290646	0.807299	2.9973	circRNA_3885|Chr20:4896892_4921063_-
GO:0002204	somatic recombination of immunoglobulin genes involved in immune response	biological_process	cellular process|developmental process|immune system process|metabolic process|multicellular organismal process|response to stimulus	1	371	5	6672	0.248846	0.807299	3.59677	circRNA_5526|Chr6:11219826_11221789_-
GO:0002244	hematopoietic progenitor cell differentiation	biological_process	cellular process|developmental process|immune system process|multicellular organismal process	2	371	43	6672	0.699251	0.864628	0.836457	circRNA_4346|Chr3:122130941_122141403_+;circRNA_5232|Chr5:117620103_117623151_-
GO:0002315	marginal zone B cell differentiation	biological_process	cellular process|developmental process|immune system process|multicellular organismal process|response to stimulus	1	371	5	6672	0.248846	0.807299	3.59677	circRNA_6169|Chr7:119987740_119990307_-
GO:0002318	myeloid progenitor cell differentiation	biological_process	cellular process|developmental process|immune system process|multicellular organismal process	1	371	7	6672	0.330125	0.807299	2.56912	circRNA_3815|Chr2:238742934_238746181_-
GO:0002329	pre-B cell differentiation	biological_process	cellular process|developmental process|immune system process|multicellular organismal process	1	371	6	6672	0.290646	0.807299	2.9973	circRNA_4829|Chr4:131439626_131453028_-
GO:0002376	immune system process	biological_process	NA	1	371	8	6672	0.367413	0.807299	2.24798	circRNA_4897|Chr4:157436084_157436365_-
GO:0002520	immune system development	biological_process	developmental process|immune system process|multicellular organismal process	1	371	6	6672	0.290646	0.807299	2.9973	circRNA_4863|Chr4:151118221_151123637_-
GO:0002674	negative regulation of acute inflammatory response	biological_process	biological regulation|negative regulation of biological process|regulation of biological process|response to stimulus	1	371	28	6672	0.799163	0.907577	0.64228	circRNA_3663|Chr2:188308301_188309036_+
GO:0002902	regulation of B cell apoptotic process	biological_process	biological regulation|cellular process|regulation of biological process	1	371	6	6672	0.290646	0.807299	2.9973	circRNA_0647|Chr1:251455609_251485480_+
GO:0002931	response to ischemia	biological_process	response to stimulus	3	371	20	6672	0.0964449	0.778773	2.69757	circRNA_6937|Chr9:78945266_78947892_-;circRNA_0038|Chr1:15545013_15551204_+;circRNA_6935|Chr9:78911759_78911926_+
GO:0003007	heart morphogenesis	biological_process	developmental process|multicellular organismal process	5	371	56	6672	0.198999	0.807299	1.6057	circRNA_4051|Chr3:6464953_6472752_+;circRNA_3458|Chr2:57539193_57544062_-;circRNA_4413|Chr3:148837814_148842440_+;circRNA_7065|ChrX:4819220_4832241_-;circRNA_4416|Chr3:148837814_148862118_+
GO:0003009	skeletal muscle contraction	biological_process	multicellular organismal process	1	371	10	6672	0.435893	0.807299	1.79838	circRNA_1738|Chr13:52667988_52673721_+
GO:0003016	respiratory system process	biological_process	multicellular organismal process	1	371	6	6672	0.290646	0.807299	2.9973	circRNA_7065|ChrX:4819220_4832241_-
GO:0003143	embryonic heart tube morphogenesis	biological_process	developmental process|multicellular organismal process	1	371	10	6672	0.435893	0.807299	1.79838	circRNA_0375|Chr1:177651557_177654228_+
GO:0003148	outflow tract septum morphogenesis	biological_process	developmental process|multicellular organismal process	2	371	32	6672	0.538235	0.825583	1.12399	circRNA_0447|Chr1:200606971_200615170_-;circRNA_2849|Chr18:2445774_2446986_+
GO:0003149	membranous septum morphogenesis	biological_process	developmental process|multicellular organismal process	1	371	10	6672	0.435893	0.807299	1.79838	circRNA_0447|Chr1:200606971_200615170_-
GO:0003151	outflow tract morphogenesis	biological_process	developmental process|multicellular organismal process	2	371	27	6672	0.447726	0.807299	1.33214	circRNA_3458|Chr2:57539193_57544062_-;circRNA_3792|Chr2:230311167_230317038_-
GO:0003161	cardiac conduction system development	biological_process	developmental process|multicellular organismal process	1	371	8	6672	0.367413	0.807299	2.24798	circRNA_2562|Chr16:63915078_63933482_+
GO:0003208	cardiac ventricle morphogenesis	biological_process	developmental process|multicellular organismal process	1	371	5	6672	0.248846	0.807299	3.59677	circRNA_6103|Chr7:76114791_76119201_+
GO:0003222	ventricular trabecula myocardium morphogenesis	biological_process	developmental process|multicellular organismal process	1	371	7	6672	0.330125	0.807299	2.56912	circRNA_2562|Chr16:63915078_63933482_+
GO:0003279	cardiac septum development	biological_process	developmental process|multicellular organismal process	3	371	30	6672	0.23155	0.807299	1.79838	circRNA_3395|Chr2:34476081_34503654_+;circRNA_3391|Chr2:34396320_34404958_+;circRNA_3390|Chr2:34373875_34404958_+
GO:0003281	ventricular septum development	biological_process	developmental process|multicellular organismal process	1	371	25	6672	0.761393	0.889503	0.719353	circRNA_1288|Chr11:10020678_10022991_+
GO:0003382	epithelial cell morphogenesis	biological_process	cellular component organization or biogenesis|cellular process|developmental process	2	371	21	6672	0.327422	0.807299	1.71275	circRNA_6103|Chr7:76114791_76119201_+;circRNA_3944|Chr20:22822066_22856689_-
GO:0003407	neural retina development	biological_process	developmental process|multicellular organismal process	2	371	6	6672	0.0398481	0.559784	5.99461	circRNA_5986|Chr7:41167312_41167751_+;circRNA_5987|Chr7:41167312_41178782_+
GO:0003416	endochondral bone growth	biological_process	developmental process|growth|multicellular organismal process	1	371	11	6672	0.467307	0.807299	1.63489	circRNA_0447|Chr1:200606971_200615170_-
GO:0003674	molecular_function	molecular_function	NA	80	371	1144	6672	0.013831	0.42121	1.25761	circRNA_6256|Chr7:143274109_143324536_-;circRNA_1658|Chr12:43576497_43576734_-;circRNA_6828|Chr9:52047552_52048745_+;circRNA_4481|Chr3:172518176_172524861_+;circRNA_1993|Chr14:22619364_22655924_+;circRNA_0225|Chr1:127025462_127025957_+;circRNA_1076|Chr10:71001715_71009562_+;circRNA_4593|Chr4:31220330_31319352_+;circRNA_5775|Chr6:108797786_108802113_+;circRNA_1255|Chr10:106264856_106265494_+;circR…
GO:0003676	nucleic acid binding	molecular_function	binding	7	371	174	6672	0.858882	0.931653	0.723487	circRNA_2982|Chr18:49891333_49891588_-;circRNA_0275|Chr1:142849916_142852148_+;circRNA_3092|Chr18:81418662_81428974_-;circRNA_3014|Chr18:61328528_61340634_+;circRNA_4766|Chr4:100779730_100783015_-;circRNA_3010|Chr18:61323689_61328704_+;circRNA_3237|Chr19:43265984_43294685_+
GO:0003677	DNA binding	molecular_function	binding	23	371	454	6672	0.713629	0.871665	0.911075	circRNA_2259|Chr15:24024429_24032402_-;circRNA_0233|Chr1:128239552_128243030_-;circRNA_4186|Chr3:59678949_59680308_-;circRNA_4697|Chr4:66567829_66568912_-;circRNA_6915|Chr9:70787138_70787910_-;circRNA_1957|Chr14:10786399_10787114_+;circRNA_3203|Chr19:38057557_38062193_+;circRNA_3847|Chr2:257626382_257629063_+;circRNA_4773|Chr4:115104274_115142108_-;circRNA_1959|Chr14:10786399_10794860_+;circRNA_2…
GO:0003682	chromatin binding	molecular_function	binding	22	371	351	6672	0.308951	0.807299	1.12719	circRNA_2259|Chr15:24024429_24032402_-;circRNA_0233|Chr1:128239552_128243030_-;circRNA_4186|Chr3:59678949_59680308_-;circRNA_5208|Chr5:106171074_106171781_-;circRNA_3203|Chr19:38057557_38062193_+;circRNA_3458|Chr2:57539193_57544062_-;circRNA_6103|Chr7:76114791_76119201_+;circRNA_1551|Chr12:13879069_13884323_+;circRNA_6753|Chr9:18653895_18660843_+;circRNA_5163|Chr5:90817794_90827570_+;circRNA_3663…
GO:0003684	damaged DNA binding	molecular_function	binding	1	371	23	6672	0.732356	0.878053	0.781906	circRNA_5526|Chr6:11219826_11221789_-
GO:0003690	double-stranded DNA binding	molecular_function	binding	8	371	70	6672	0.0393258	0.559784	2.05529	circRNA_4186|Chr3:59678949_59680308_-;circRNA_5752|Chr6:102510293_102512499_+;circRNA_5526|Chr6:11219826_11221789_-;circRNA_4448|Chr3:156690910_156699465_+;circRNA_1949|Chr14:7291691_7293326_-;circRNA_2849|Chr18:2445774_2446986_+;circRNA_0921|Chr10:38712831_38720071_+;circRNA_3057|Chr18:72593000_72595275_+
GO:0003697	single-stranded DNA binding	molecular_function	binding	3	371	33	6672	0.277245	0.807299	1.63489	circRNA_5752|Chr6:102510293_102512499_+;circRNA_5526|Chr6:11219826_11221789_-;circRNA_4448|Chr3:156690910_156699465_+
GO:0003700	DNA binding transcription factor activity	molecular_function	NA	20	371	301	6672	0.233145	0.807299	1.19494	circRNA_3621|Chr2:184309074_184309661_-;circRNA_0233|Chr1:128239552_128243030_-;circRNA_3087|Chr18:79813606_79815529_+;circRNA_6915|Chr9:70787138_70787910_-;circRNA_3203|Chr19:38057557_38062193_+;circRNA_3014|Chr18:61328528_61340634_+;circRNA_3268|Chr19:56187917_56188816_+;circRNA_0185|Chr1:93851663_93853240_-;circRNA_6103|Chr7:76114791_76119201_+;circRNA_0375|Chr1:177651557_177654228_+;circRNA_6…
GO:0003705	transcription factor activity, RNA polymerase II distal enhancer sequence-specific binding	molecular_function	NA	4	371	29	6672	0.0745243	0.706419	2.48053	circRNA_0233|Chr1:128239552_128243030_-;circRNA_1286|Chr11:3142305_3142832_+;circRNA_4829|Chr4:131439626_131453028_-;circRNA_2849|Chr18:2445774_2446986_+
GO:0003707	steroid hormone receptor activity	molecular_function	molecular transducer activity|receptor activity	1	371	18	6672	0.643406	0.848633	0.999102	circRNA_1897|Chr13:106507146_106507561_+
GO:0003712	transcription cofactor activity	molecular_function	protein binding transcription factor activity	3	371	60	6672	0.656562	0.852917	0.899191	circRNA_2865|Chr18:6047215_6051719_-;circRNA_2562|Chr16:63915078_63933482_+;circRNA_0933|Chr10:43227922_43229953_+
GO:0003713	transcription coactivator activity	molecular_function	protein binding transcription factor activity	5	371	107	6672	0.717884	0.872263	0.840366	circRNA_6275|Chr8:12160079_12161683_+;circRNA_5617|Chr6:41822551_41830656_-;circRNA_4413|Chr3:148837814_148842440_+;circRNA_2388|Chr15:70790038_70832121_+;circRNA_4416|Chr3:148837814_148862118_+
GO:0003714	transcription corepressor activity	molecular_function	protein binding transcription factor activity	5	371	103	6672	0.685961	0.860995	0.873001	circRNA_4697|Chr4:66567829_66568912_-;circRNA_4927|Chr4:170518672_170520365_+;circRNA_5450|Chr5:167486001_167547741_+;circRNA_4937|Chr4:174810962_174816343_+;circRNA_2690|Chr17:29730437_29737981_-
GO:0003723	RNA binding	molecular_function	binding	17	371	225	6672	0.121205	0.807299	1.35878	circRNA_6107|Chr7:76837537_76845975_-;circRNA_2259|Chr15:24024429_24032402_-;circRNA_2759|Chr17:75295083_75352500_+;circRNA_0544|Chr1:220039308_220042767_-;circRNA_5840|Chr6:129621583_129636485_+;circRNA_2410|Chr15:105687771_105688392_+;circRNA_0547|Chr1:220042074_220049075_-;circRNA_2258|Chr15:23840157_23853169_+;circRNA_5844|Chr6:129641475_129660096_+;circRNA_6934|Chr9:78341845_78350281_-;circR…
GO:0003725	double-stranded RNA binding	molecular_function	binding	1	371	35	6672	0.865698	0.93499	0.513824	circRNA_3581|Chr2:150755405_150756431_+
GO:0003729	mRNA binding	molecular_function	binding	4	371	65	6672	0.492151	0.810254	1.1067	circRNA_0544|Chr1:220039308_220042767_-;circRNA_0547|Chr1:220042074_220049075_-;circRNA_2258|Chr15:23840157_23853169_+;circRNA_0543|Chr1:220039308_220040146_-
GO:0003730	mRNA 3'-UTR binding	molecular_function	binding	3	371	29	6672	0.216635	0.807299	1.8604	circRNA_0544|Chr1:220039308_220042767_-;circRNA_0547|Chr1:220042074_220049075_-;circRNA_0543|Chr1:220039308_220040146_-
GO:0003743	translation initiation factor activity	molecular_function	binding	4	371	22	6672	0.0310342	0.531828	3.26979	circRNA_0432|Chr1:197981834_197983786_-;circRNA_0433|Chr1:197981834_197983858_-;circRNA_1447|Chr11:81375744_81376852_-;circRNA_5413|Chr5:156506448_156517254_+
GO:0003746	translation elongation factor activity	molecular_function	binding	1	371	9	6672	0.402631	0.807299	1.9982	circRNA_4808|Chr4:120295643_120298656_-
GO:0003777	microtubule motor activity	molecular_function	catalytic activity	4	371	77	6672	0.627497	0.848633	0.934225	circRNA_1867|Chr13:97022518_97023051_-;circRNA_1093|Chr10:72203091_72212546_+;circRNA_2726|Chr17:54209230_54209739_+;circRNA_6415|Chr8:64635064_64648503_+
GO:0003779	actin binding	molecular_function	binding	16	371	237	6672	0.244417	0.807299	1.2141	circRNA_1738|Chr13:52667988_52673721_+;circRNA_2378|Chr15:70098761_70139170_-;circRNA_6219|Chr7:130522030_130524289_+;circRNA_0052|Chr1:20961258_20962540_-;circRNA_4658|Chr4:62270233_62272586_+;circRNA_2375|Chr15:70077466_70105489_-;circRNA_5302|Chr5:135354650_135359472_+;circRNA_3283|Chr19:61714402_61714542_+;circRNA_1346|Chr11:34865447_34879143_+;circRNA_1093|Chr10:72203091_72212546_+;circRNA_5…
GO:0003924	GTPase activity	molecular_function	catalytic activity	8	371	96	6672	0.163824	0.807299	1.49865	circRNA_1188|Chr10:89036545_89074755_+;circRNA_1255|Chr10:106264856_106265494_+;circRNA_0591|Chr1:233578229_233581182_+;circRNA_3733|Chr2:208198684_208203924_-;circRNA_5962|Chr7:29284390_29288495_+;circRNA_5687|Chr6:76020953_76031336_+;circRNA_6987|Chr9:96746440_96751314_+;circRNA_4808|Chr4:120295643_120298656_-
GO:0003950	NAD+ ADP-ribosyltransferase activity	molecular_function	catalytic activity	1	371	12	6672	0.496977	0.810254	1.49865	circRNA_2275|Chr15:36823412_36828644_+
GO:0004004	ATP-dependent RNA helicase activity	molecular_function	catalytic activity	4	371	22	6672	0.0310342	0.531828	3.26979	circRNA_4054|Chr3:7456433_7475230_+;circRNA_1447|Chr11:81375744_81376852_-;circRNA_3237|Chr19:43265984_43294685_+;circRNA_1625|Chr12:37462807_37465389_-
GO:0004012	phospholipid-translocating ATPase activity	molecular_function	catalytic activity|transporter activity	2	371	27	6672	0.447726	0.807299	1.33214	circRNA_3080|Chr18:77484239_77520779_-;circRNA_3074|Chr18:77466020_77520779_-
GO:0004177	aminopeptidase activity	molecular_function	catalytic activity	2	371	11	6672	0.121747	0.807299	3.26979	circRNA_1165|Chr10:85164768_85172858_-;circRNA_2599|Chr17:599906_610676_+
GO:0004181	metallocarboxypeptidase activity	molecular_function	catalytic activity	1	371	22	6672	0.716542	0.871665	0.817447	circRNA_2614|Chr17:5511386_5548199_+
GO:0004222	metalloendopeptidase activity	molecular_function	catalytic activity	3	371	57	6672	0.621804	0.847573	0.946517	circRNA_3395|Chr2:34476081_34503654_+;circRNA_3391|Chr2:34396320_34404958_+;circRNA_3390|Chr2:34373875_34404958_+
GO:0004252	serine-type endopeptidase activity	molecular_function	catalytic activity	1	371	17	6672	0.622353	0.847573	1.05787	circRNA_3791|Chr2:227687641_227700240_+
GO:0004301	epoxide hydrolase activity	molecular_function	catalytic activity	1	371	5	6672	0.248846	0.807299	3.59677	circRNA_2599|Chr17:599906_610676_+
GO:0004364	glutathione transferase activity	molecular_function	catalytic activity	3	371	12	6672	0.0257724	0.495978	4.49596	circRNA_3745|Chr2:210808354_210822401_-;circRNA_3744|Chr2:210806416_210806638_+;circRNA_3738|Chr2:210723584_210806489_-
GO:0004407	histone deacetylase activity	molecular_function	catalytic activity	1	371	12	6672	0.496977	0.810254	1.49865	circRNA_0933|Chr10:43227922_43229953_+
GO:0004438	phosphatidylinositol-3-phosphatase activity	molecular_function	catalytic activity	2	371	16	6672	0.222389	0.807299	2.24798	circRNA_2831|Chr18:301858_306376_-;circRNA_0647|Chr1:251455609_251485480_+
GO:0004497	monooxygenase activity	molecular_function	catalytic activity	1	371	10	6672	0.435893	0.807299	1.79838	circRNA_6157|Chr7:116072198_116158807_-
GO:0004519	endonuclease activity	molecular_function	catalytic activity	1	371	7	6672	0.330125	0.807299	2.56912	circRNA_2493|Chr16:19805426_19805902_+
GO:0004602	glutathione peroxidase activity	molecular_function	antioxidant activity|catalytic activity	1	371	5	6672	0.248846	0.807299	3.59677	circRNA_3738|Chr2:210723584_210806489_-
GO:0004605	phosphatidate cytidylyltransferase activity	molecular_function	catalytic activity	1	371	5	6672	0.248846	0.807299	3.59677	circRNA_1955|Chr14:9421418_9440942_-
GO:0004614	phosphoglucomutase activity	molecular_function	catalytic activity	2	371	8	6672	0.0691104	0.671779	4.49596	circRNA_0613|Chr1:242716557_242737019_-;circRNA_0609|Chr1:242607845_242631822_-
GO:0004620	phospholipase activity	molecular_function	catalytic activity	1	371	9	6672	0.402631	0.807299	1.9982	circRNA_5564|Chr6:25409775_25417047_-
GO:0004622	lysophospholipase activity	molecular_function	catalytic activity	1	371	9	6672	0.402631	0.807299	1.9982	circRNA_5564|Chr6:25409775_25417047_-
GO:0004630	phospholipase D activity	molecular_function	catalytic activity	1	371	5	6672	0.248846	0.807299	3.59677	circRNA_3514|Chr2:113744312_113745181_+
GO:0004649	poly(ADP-ribose) glycohydrolase activity	molecular_function	catalytic activity	1	371	5	6672	0.248846	0.807299	3.59677	circRNA_2472|Chr16:8396763_8400882_+
GO:0004652	polynucleotide adenylyltransferase activity	molecular_function	catalytic activity	2	371	10	6672	0.103274	0.787414	3.59677	circRNA_5840|Chr6:129621583_129636485_+;circRNA_5844|Chr6:129641475_129660096_+
GO:0004672	protein kinase activity	molecular_function	catalytic activity	10	371	230	6672	0.832019	0.918445	0.781906	circRNA_4347|Chr3:122318077_122318825_+;circRNA_4697|Chr4:66567829_66568912_-;circRNA_3572|Chr2:144876416_144917472_+;circRNA_7179|ChrX:109996163_110063748_+;circRNA_6391|Chr8:60917720_60920949_-;circRNA_0038|Chr1:15545013_15551204_+;circRNA_1346|Chr11:34865447_34879143_+;circRNA_5806|Chr6:124625936_124680274_-;circRNA_1349|Chr11:34879058_34932316_+;circRNA_1270|Chr10:110157631_110164041_-
GO:0004674	protein serine/threonine kinase activity	molecular_function	catalytic activity	9	371	259	6672	0.95672	0.980024	0.624921	circRNA_4183|Chr3:59075644_59085278_+;circRNA_4697|Chr4:66567829_66568912_-;circRNA_3572|Chr2:144876416_144917472_+;circRNA_7179|ChrX:109996163_110063748_+;circRNA_1346|Chr11:34865447_34879143_+;circRNA_5806|Chr6:124625936_124680274_-;circRNA_1349|Chr11:34879058_34932316_+;circRNA_4448|Chr3:156690910_156699465_+;circRNA_1270|Chr10:110157631_110164041_-
GO:0004709	MAP kinase kinase kinase activity	molecular_function	catalytic activity	3	371	70	6672	0.755552	0.888553	0.770735	circRNA_4183|Chr3:59075644_59085278_+;circRNA_0038|Chr1:15545013_15551204_+;circRNA_0447|Chr1:200606971_200615170_-
GO:0004712	protein serine/threonine/tyrosine kinase activity	molecular_function	catalytic activity	2	371	12	6672	0.140942	0.807299	2.9973	circRNA_1346|Chr11:34865447_34879143_+;circRNA_1349|Chr11:34879058_34932316_+
GO:0004713	protein tyrosine kinase activity	molecular_function	catalytic activity	3	371	70	6672	0.755552	0.888553	0.770735	circRNA_1346|Chr11:34865447_34879143_+;circRNA_0447|Chr1:200606971_200615170_-;circRNA_1349|Chr11:34879058_34932316_+
GO:0004714	transmembrane receptor protein tyrosine kinase activity	molecular_function	catalytic activity|molecular transducer activity|receptor activity	1	371	31	6672	0.830968	0.917779	0.580123	circRNA_0447|Chr1:200606971_200615170_-
GO:0004715	non-membrane spanning protein tyrosine kinase activity	molecular_function	catalytic activity	3	371	41	6672	0.400887	0.807299	1.31589	circRNA_6391|Chr8:60917720_60920949_-;circRNA_1346|Chr11:34865447_34879143_+;circRNA_1349|Chr11:34879058_34932316_+
GO:0004721	phosphoprotein phosphatase activity	molecular_function	catalytic activity	3	371	37	6672	0.339237	0.807299	1.45815	circRNA_6001|Chr7:51425330_51432888_-;circRNA_0647|Chr1:251455609_251485480_+;circRNA_1029|Chr10:62751173_62767418_-
GO:0004722	protein serine/threonine phosphatase activity	molecular_function	catalytic activity	1	371	42	6672	0.91023	0.961815	0.428186	circRNA_0647|Chr1:251455609_251485480_+
GO:0004725	protein tyrosine phosphatase activity	molecular_function	catalytic activity	4	371	65	6672	0.492151	0.810254	1.1067	circRNA_5059|Chr5:48695038_48698976_+;circRNA_2831|Chr18:301858_306376_-;circRNA_0647|Chr1:251455609_251485480_+;circRNA_1029|Chr10:62751173_62767418_-
GO:0004768	stearoyl-CoA 9-desaturase activity	molecular_function	catalytic activity	2	371	8	6672	0.0691104	0.671779	4.49596	circRNA_0734|Chr1:264001511_264066989_+;circRNA_0576|Chr1:226119298_226139368_-
GO:0004842	ubiquitin-protein transferase activity	molecular_function	catalytic activity	10	371	227	6672	0.819986	0.913126	0.792239	circRNA_3621|Chr2:184309074_184309661_-;circRNA_6407|Chr8:64171150_64184113_-;circRNA_5302|Chr5:135354650_135359472_+;circRNA_0073|Chr1:28362167_28375861_+;circRNA_6934|Chr9:78341845_78350281_-;circRNA_2847|Chr18:2018381_2018553_-;circRNA_3367|Chr2:30384653_30433774_-;circRNA_3216|Chr19:39543248_39545672_+;circRNA_6742|Chr9:16036525_16039832_+;circRNA_2278|Chr15:36934315_36940208_+
GO:0004843	thiol-dependent ubiquitin-specific protease activity	molecular_function	catalytic activity	1	371	65	6672	0.97618	0.98792	0.276674	circRNA_0485|Chr1:204960841_204961691_+
GO:0004857	enzyme inhibitor activity	molecular_function	enzyme regulator activity	2	371	19	6672	0.285525	0.807299	1.89303	circRNA_4897|Chr4:157436084_157436365_-;circRNA_6001|Chr7:51425330_51432888_-
GO:0004860	protein kinase inhibitor activity	molecular_function	enzyme regulator activity	1	371	7	6672	0.330125	0.807299	2.56912	circRNA_7247|ChrX:157322637_157323315_+
GO:0004871	signal transducer activity	molecular_function	NA	2	371	107	6672	0.984543	0.992771	0.336146	circRNA_0591|Chr1:233578229_233581182_+;circRNA_0447|Chr1:200606971_200615170_-
GO:0004888	transmembrane signaling receptor activity	molecular_function	molecular transducer activity|receptor activity	1	371	38	6672	0.886988	0.948	0.473259	circRNA_0447|Chr1:200606971_200615170_-
GO:0004930	G-protein coupled receptor activity	molecular_function	molecular transducer activity|receptor activity	4	371	29	6672	0.0745243	0.706419	2.48053	circRNA_3844|Chr2:256682926_256683075_+;circRNA_3842|Chr2:256669855_256683075_+;circRNA_5227|Chr5:117024123_117030956_-;circRNA_1619|Chr12:31216380_31225308_-
GO:0005007	fibroblast growth factor-activated receptor activity	molecular_function	catalytic activity|molecular transducer activity|receptor activity	1	371	5	6672	0.248846	0.807299	3.59677	circRNA_0447|Chr1:200606971_200615170_-
GO:0005041	low-density lipoprotein particle receptor activity	molecular_function	molecular transducer activity|receptor activity|transporter activity	1	371	8	6672	0.367413	0.807299	2.24798	circRNA_2459|Chr16:7226824_7229432_-
GO:0005044	scavenger receptor activity	molecular_function	molecular transducer activity|receptor activity|transporter activity	2	371	9	6672	0.0856728	0.732146	3.99641	circRNA_3791|Chr2:227687641_227700240_+;circRNA_2459|Chr16:7226824_7229432_-
GO:0005070	SH3/SH2 adaptor activity	molecular_function	binding	1	371	35	6672	0.865698	0.93499	0.513824	circRNA_0716|Chr1:259479327_259489683_-
GO:0005085	guanyl-nucleotide exchange factor activity	molecular_function	binding	4	371	72	6672	0.573883	0.832613	0.999102	circRNA_0617|Chr1:243014234_243018525_+;circRNA_2304|Chr15:41008529_41011344_+;circRNA_5662|Chr6:60609626_60618957_+;circRNA_5232|Chr5:117620103_117623151_-
GO:0005089	Rho guanyl-nucleotide exchange factor activity	molecular_function	binding	1	371	43	6672	0.915253	0.964142	0.418229	circRNA_1315|Chr11:31974630_31979720_+
GO:0005096	GTPase activator activity	molecular_function	enzyme regulator activity	15	371	262	6672	0.492415	0.810254	1.02961	circRNA_1267|Chr10:109754906_109755050_+;circRNA_1266|Chr10:109754888_109755050_+;circRNA_1064|Chr10:67497682_67503048_+;circRNA_6046|Chr7:64125692_64131186_-;circRNA_6781|Chr9:30155195_30155808_+;circRNA_0591|Chr1:233578229_233581182_+;circRNA_4098|Chr3:21782079_21792112_+;circRNA_1265|Chr10:109754865_109755050_+;circRNA_2819|Chr17:87758882_87760775_-;circRNA_6811|Chr9:46123188_46125984_-;circRN…
GO:0005102	signaling receptor binding	molecular_function	binding	7	371	146	6672	0.710827	0.871665	0.862238	circRNA_4561|Chr4:22084945_22091386_+;circRNA_3738|Chr2:210723584_210806489_-;circRNA_6937|Chr9:78945266_78947892_-;circRNA_3283|Chr19:61714402_61714542_+;circRNA_6935|Chr9:78911759_78911926_+;circRNA_2562|Chr16:63915078_63933482_+;circRNA_3727|Chr2:206964921_206976810_-
GO:0005154	epidermal growth factor receptor binding	molecular_function	binding	1	371	30	6672	0.820968	0.913126	0.599461	circRNA_2439|Chr16:2354385_2354582_-
GO:0005158	insulin receptor binding	molecular_function	binding	1	371	49	6672	0.940022	0.974468	0.367017	circRNA_0716|Chr1:259479327_259489683_-
GO:0005160	transforming growth factor beta receptor binding	molecular_function	binding	1	371	14	6672	0.551462	0.825583	1.28456	circRNA_3057|Chr18:72593000_72595275_+
GO:0005161	platelet-derived growth factor receptor binding	molecular_function	binding	1	371	12	6672	0.496977	0.810254	1.49865	circRNA_0647|Chr1:251455609_251485480_+
GO:0005176	ErbB-2 class receptor binding	molecular_function	binding	1	371	8	6672	0.367413	0.807299	2.24798	circRNA_2562|Chr16:63915078_63933482_+
GO:0005178	integrin binding	molecular_function	binding	11	371	94	6672	0.0146772	0.42121	2.10449	circRNA_6828|Chr9:52047552_52048745_+;circRNA_6937|Chr9:78945266_78947892_-;circRNA_6830|Chr9:52048089_52048881_+;circRNA_4330|Chr3:117726599_117728604_-;circRNA_6827|Chr9:52047552_52047844_+;circRNA_1818|Chr13:77863217_77865781_-;circRNA_3283|Chr19:61714402_61714542_+;circRNA_6825|Chr9:52043678_52045132_+;circRNA_6935|Chr9:78911759_78911926_+;circRNA_2562|Chr16:63915078_63933482_+;circRNA_0011|C…
GO:0005198	structural molecule activity	molecular_function	NA	6	371	56	6672	0.0890702	0.754888	1.92684	circRNA_6256|Chr7:143274109_143324536_-;circRNA_5368|Chr5:147482283_147483432_+;circRNA_0052|Chr1:20961258_20962540_-;circRNA_6953|Chr9:82558343_82558587_+;circRNA_2985|Chr18:51805551_51807909_+;circRNA_6952|Chr9:82557123_82558587_+
GO:0005200	structural constituent of cytoskeleton	molecular_function	structural molecule activity	4	371	30	6672	0.0823967	0.732146	2.39784	circRNA_1738|Chr13:52667988_52673721_+;circRNA_1188|Chr10:89036545_89074755_+;circRNA_0052|Chr1:20961258_20962540_-;circRNA_1185|Chr10:88046855_88047023_+
GO:0005201	extracellular matrix structural constituent	molecular_function	structural molecule activity	10	371	57	6672	0.00103203	0.214202	3.15506	circRNA_6828|Chr9:52047552_52048745_+;circRNA_4051|Chr3:6464953_6472752_+;circRNA_6937|Chr9:78945266_78947892_-;circRNA_6830|Chr9:52048089_52048881_+;circRNA_4330|Chr3:117726599_117728604_-;circRNA_1147|Chr10:82752455_82752793_+;circRNA_6827|Chr9:52047552_52047844_+;circRNA_6825|Chr9:52043678_52045132_+;circRNA_6935|Chr9:78911759_78911926_+;circRNA_6551|Chr8:87100666_87102375_-
GO:0005215	transporter activity	molecular_function	NA	1	371	7	6672	0.330125	0.807299	2.56912	circRNA_4366|Chr3:124680315_124680563_-
GO:0005220	inositol 1,4,5-trisphosphate-sensitive calcium-release channel activity	molecular_function	molecular transducer activity|receptor activity|transporter activity	1	371	5	6672	0.248846	0.807299	3.59677	circRNA_4948|Chr4:180711145_180722357_-
GO:0005245	voltage-gated calcium channel activity	molecular_function	transporter activity	1	371	24	6672	0.74729	0.883396	0.749326	circRNA_4863|Chr4:151118221_151123637_-
GO:0005261	cation channel activity	molecular_function	transporter activity	2	371	17	6672	0.243383	0.807299	2.11574	circRNA_4863|Chr4:151118221_151123637_-;circRNA_0857|Chr10:13944932_13945211_+
GO:0005262	calcium channel activity	molecular_function	transporter activity	1	371	15	6672	0.576456	0.832613	1.19892	circRNA_0857|Chr10:13944932_13945211_+
GO:0005313	L-glutamate transmembrane transporter activity	molecular_function	transporter activity	1	371	7	6672	0.330125	0.807299	2.56912	circRNA_4593|Chr4:31220330_31319352_+
GO:0005324	long-chain fatty acid transporter activity	molecular_function	transporter activity	1	371	10	6672	0.435893	0.807299	1.79838	circRNA_3773|Chr2:225348168_225352508_-
GO:0005388	calcium-transporting ATPase activity	molecular_function	catalytic activity|transporter activity	2	371	9	6672	0.0856728	0.732146	3.99641	circRNA_5986|Chr7:41167312_41167751_+;circRNA_5987|Chr7:41167312_41178782_+
GO:0005484	SNAP receptor activity	molecular_function	binding	1	371	10	6672	0.435893	0.807299	1.79838	circRNA_0939|Chr10:45771832_45778634_-
GO:0005496	steroid binding	molecular_function	binding	3	371	9	6672	0.0111419	0.367693	5.99461	circRNA_3745|Chr2:210808354_210822401_-;circRNA_3744|Chr2:210806416_210806638_+;circRNA_1897|Chr13:106507146_106507561_+
GO:0005504	fatty acid binding	molecular_function	binding	3	371	7	6672	0.00504645	0.272375	7.70735	circRNA_1267|Chr10:109754906_109755050_+;circRNA_1266|Chr10:109754888_109755050_+;circRNA_1265|Chr10:109754865_109755050_+
GO:0005506	iron ion binding	molecular_function	binding	9	371	43	6672	0.00048119	0.123365	3.76406	circRNA_0342|Chr1:168958579_168964665_+;circRNA_0868|Chr10:15577563_15589574_-;circRNA_6157|Chr7:116072198_116158807_-;circRNA_0869|Chr10:15577563_15603016_-;circRNA_5223|Chr5:115146569_115199307_-;circRNA_0734|Chr1:264001511_264066989_+;circRNA_4773|Chr4:115104274_115142108_-;circRNA_3815|Chr2:238742934_238746181_-;circRNA_4771|Chr4:115104274_115106424_-
GO:0005509	calcium ion binding	molecular_function	binding	12	371	314	6672	0.940259	0.974468	0.68728	circRNA_4593|Chr4:31220330_31319352_+;circRNA_1738|Chr13:52667988_52673721_+;circRNA_3844|Chr2:256682926_256683075_+;circRNA_3842|Chr2:256669855_256683075_+;circRNA_4330|Chr3:117726599_117728604_-;circRNA_5902|Chr6:144189453_144275272_+;circRNA_2459|Chr16:7226824_7229432_-;circRNA_7047|Chr9:119309035_119311107_-;circRNA_1315|Chr11:31974630_31979720_+;circRNA_6811|Chr9:46123188_46125984_-;circRNA_…
GO:0005515	protein binding	molecular_function	NA	41	371	953	6672	0.974768	0.987284	0.773701	circRNA_1267|Chr10:109754906_109755050_+;circRNA_1738|Chr13:52667988_52673721_+;circRNA_1547|Chr12:13717791_13718009_-;circRNA_4863|Chr4:151118221_151123637_-;circRNA_6219|Chr7:130522030_130524289_+;circRNA_0233|Chr1:128239552_128243030_-;circRNA_1878|Chr13:100347405_100353039_-;circRNA_6441|Chr8:68539308_68542150_+;circRNA_6937|Chr9:78945266_78947892_-;circRNA_4186|Chr3:59678949_59680308_-;circR…
GO:0005516	calmodulin binding	molecular_function	binding	4	371	116	6672	0.893616	0.950626	0.620132	circRNA_4863|Chr4:151118221_151123637_-;circRNA_4658|Chr4:62270233_62272586_+;circRNA_5986|Chr7:41167312_41167751_+;circRNA_5987|Chr7:41167312_41178782_+
GO:0005518	collagen binding	molecular_function	binding	4	371	40	6672	0.180401	0.807299	1.79838	circRNA_5266|Chr5:127620259_127635191_-;circRNA_3283|Chr19:61714402_61714542_+;circRNA_5265|Chr5:127620259_127629649_-;circRNA_1363|Chr11:46324401_46341113_-
GO:0005522	profilin binding	molecular_function	binding	1	371	7	6672	0.330125	0.807299	2.56912	circRNA_1878|Chr13:100347405_100353039_-
GO:0005523	tropomyosin binding	molecular_function	binding	1	371	9	6672	0.402631	0.807299	1.9982	circRNA_1738|Chr13:52667988_52673721_+
GO:0005524	ATP binding	molecular_function	binding	45	371	824	6672	0.577973	0.833631	0.982127	circRNA_4183|Chr3:59075644_59085278_+;circRNA_1942|Chr14:5870915_5943886_+;circRNA_1867|Chr13:97022518_97023051_-;circRNA_1547|Chr12:13717791_13718009_-;circRNA_4776|Chr4:115221467_115224878_-;circRNA_4347|Chr3:122318077_122318825_+;circRNA_4697|Chr4:66567829_66568912_-;circRNA_3572|Chr2:144876416_144917472_+;circRNA_0649|Chr1:252537818_252539458_-;circRNA_7179|ChrX:109996163_110063748_+;circRNA_…
GO:0005525	GTP binding	molecular_function	binding	13	371	130	6672	0.0280985	0.501131	1.79838	circRNA_6242|Chr7:140415833_140417547_-;circRNA_1188|Chr10:89036545_89074755_+;circRNA_1255|Chr10:106264856_106265494_+;circRNA_5059|Chr5:48695038_48698976_+;circRNA_6241|Chr7:140415223_140417547_-;circRNA_0591|Chr1:233578229_233581182_+;circRNA_4837|Chr4:140870957_140872418_+;circRNA_2439|Chr16:2354385_2354582_-;circRNA_3733|Chr2:208198684_208203924_-;circRNA_5962|Chr7:29284390_29288495_+;circRN…
GO:0005539	glycosaminoglycan binding	molecular_function	binding	2	371	17	6672	0.243383	0.807299	2.11574	circRNA_7247|ChrX:157322637_157323315_+;circRNA_1363|Chr11:46324401_46341113_-
GO:0005540	hyaluronic acid binding	molecular_function	binding	1	371	5	6672	0.248846	0.807299	3.59677	circRNA_2459|Chr16:7226824_7229432_-
GO:0005543	phospholipid binding	molecular_function	binding	3	371	80	6672	0.830243	0.917779	0.674394	circRNA_5902|Chr6:144189453_144275272_+;circRNA_3620|Chr2:183555214_183558410_-;circRNA_6987|Chr9:96746440_96751314_+
GO:0005544	calcium-dependent phospholipid binding	molecular_function	binding	1	371	56	6672	0.959945	0.980685	0.32114	circRNA_5902|Chr6:144189453_144275272_+
GO:0005545	1-phosphatidylinositol binding	molecular_function	binding	2	371	22	6672	0.348137	0.807299	1.63489	circRNA_1064|Chr10:67497682_67503048_+;circRNA_0290|Chr1:154405931_154425509_+
GO:0005546	phosphatidylinositol-4,5-bisphosphate binding	molecular_function	binding	2	371	38	6672	0.632638	0.848633	0.946517	circRNA_1064|Chr10:67497682_67503048_+;circRNA_0290|Chr1:154405931_154425509_+
GO:0005547	phosphatidylinositol-3,4,5-trisphosphate binding	molecular_function	binding	1	371	29	6672	0.810378	0.91232	0.620132	circRNA_1064|Chr10:67497682_67503048_+
GO:0005575	cellular_component	cellular_component	NA	62	371	1003	6672	0.19477	0.807299	1.11166	circRNA_1658|Chr12:43576497_43576734_-;circRNA_4481|Chr3:172518176_172524861_+;circRNA_1993|Chr14:22619364_22655924_+;circRNA_0225|Chr1:127025462_127025957_+;circRNA_1076|Chr10:71001715_71009562_+;circRNA_4593|Chr4:31220330_31319352_+;circRNA_5775|Chr6:108797786_108802113_+;circRNA_1255|Chr10:106264856_106265494_+;circRNA_0080|Chr1:31950617_31954909_-;circRNA_0613|Chr1:242716557_242737019_-;circR…
GO:0005576	extracellular region	cellular_component	NA	20	371	137	6672	6.08636e-05	0.0948844	2.62538	circRNA_3745|Chr2:210808354_210822401_-;circRNA_6828|Chr9:52047552_52048745_+;circRNA_0225|Chr1:127025462_127025957_+;circRNA_1076|Chr10:71001715_71009562_+;circRNA_3744|Chr2:210806416_210806638_+;circRNA_4051|Chr3:6464953_6472752_+;circRNA_6937|Chr9:78945266_78947892_-;circRNA_3914|Chr20:12666784_12667523_+;circRNA_6830|Chr9:52048089_52048881_+;circRNA_4330|Chr3:117726599_117728604_-;circRNA_114…
GO:0005577	fibrinogen complex	cellular_component	extracellular region|extracellular region part|macromolecular complex	2	371	7	6672	0.0537688	0.612665	5.13824	circRNA_6937|Chr9:78945266_78947892_-;circRNA_6935|Chr9:78911759_78911926_+
GO:0005578	proteinaceous extracellular matrix	cellular_component	NA	15	371	110	6672	0.00104438	0.214202	2.45234	circRNA_6828|Chr9:52047552_52048745_+;circRNA_4051|Chr3:6464953_6472752_+;circRNA_6937|Chr9:78945266_78947892_-;circRNA_3914|Chr20:12666784_12667523_+;circRNA_6830|Chr9:52048089_52048881_+;circRNA_5945|Chr7:23546534_23546690_+;circRNA_4330|Chr3:117726599_117728604_-;circRNA_1147|Chr10:82752455_82752793_+;circRNA_6827|Chr9:52047552_52047844_+;circRNA_1818|Chr13:77863217_77865781_-;circRNA_6825|Chr…
GO:0005581	collagen trimer	cellular_component	macromolecular complex	6	371	35	6672	0.0116835	0.37442	3.08294	circRNA_6828|Chr9:52047552_52048745_+;circRNA_4051|Chr3:6464953_6472752_+;circRNA_6830|Chr9:52048089_52048881_+;circRNA_1147|Chr10:82752455_82752793_+;circRNA_6827|Chr9:52047552_52047844_+;circRNA_6825|Chr9:52043678_52045132_+
GO:0005584	collagen type I trimer	cellular_component	extracellular matrix|extracellular matrix part|extracellular region|extracellular region part|macromolecular complex	1	371	15	6672	0.576456	0.832613	1.19892	circRNA_1147|Chr10:82752455_82752793_+
GO:0005586	collagen type III trimer	cellular_component	extracellular matrix|extracellular matrix part|extracellular region|extracellular region part|macromolecular complex	4	371	11	6672	0.00227093	0.256981	6.53957	circRNA_6828|Chr9:52047552_52048745_+;circRNA_6830|Chr9:52048089_52048881_+;circRNA_6827|Chr9:52047552_52047844_+;circRNA_6825|Chr9:52043678_52045132_+
GO:0005588	collagen type V trimer	cellular_component	extracellular matrix|extracellular matrix part|extracellular region|extracellular region part|macromolecular complex	1	371	5	6672	0.248846	0.807299	3.59677	circRNA_4051|Chr3:6464953_6472752_+
GO:0005604	basement membrane	cellular_component	extracellular matrix|extracellular matrix part|extracellular region|extracellular region part	6	371	51	6672	0.061994	0.669209	2.11574	circRNA_4051|Chr3:6464953_6472752_+;circRNA_6937|Chr9:78945266_78947892_-;circRNA_5945|Chr7:23546534_23546690_+;circRNA_4330|Chr3:117726599_117728604_-;circRNA_3283|Chr19:61714402_61714542_+;circRNA_6935|Chr9:78911759_78911926_+
GO:0005605	basal lamina	cellular_component	NA	2	371	18	6672	0.264453	0.807299	1.9982	circRNA_6937|Chr9:78945266_78947892_-;circRNA_6935|Chr9:78911759_78911926_+
GO:0005614	interstitial matrix	cellular_component	extracellular matrix|extracellular region|extracellular region part	2	371	13	6672	0.160722	0.807299	2.76674	circRNA_0206|Chr1:104792188_104821976_+;circRNA_1363|Chr11:46324401_46341113_-
GO:0005615	extracellular space	cellular_component	extracellular region|extracellular region part	23	371	241	6672	0.00754195	0.293409	1.7163	circRNA_6828|Chr9:52047552_52048745_+;circRNA_5266|Chr5:127620259_127635191_-;circRNA_1267|Chr10:109754906_109755050_+;circRNA_4051|Chr3:6464953_6472752_+;circRNA_6937|Chr9:78945266_78947892_-;circRNA_3914|Chr20:12666784_12667523_+;circRNA_6830|Chr9:52048089_52048881_+;circRNA_5945|Chr7:23546534_23546690_+;circRNA_4330|Chr3:117726599_117728604_-;circRNA_1266|Chr10:109754888_109755050_+;circRNA_11…
GO:0005622	intracellular	cellular_component	cell|cell part	17	371	335	6672	0.690118	0.863068	0.912612	circRNA_6242|Chr7:140415833_140417547_-;circRNA_6219|Chr7:130522030_130524289_+;circRNA_3572|Chr2:144876416_144917472_+;circRNA_7179|ChrX:109996163_110063748_+;circRNA_6241|Chr7:140415223_140417547_-;circRNA_0290|Chr1:154405931_154425509_+;circRNA_0591|Chr1:233578229_233581182_+;circRNA_7247|ChrX:157322637_157323315_+;circRNA_4098|Chr3:21782079_21792112_+;circRNA_0038|Chr1:15545013_15551204_+;cir…
GO:0005623	cell	cellular_component	NA	6	371	34	6672	0.0101428	0.346714	3.17362	circRNA_5523|Chr6:10920914_10923681_+;circRNA_5524|Chr6:10937102_10938824_+;circRNA_0768|Chr1:277379316_277383623_+;circRNA_2113|Chr14:82239645_82240095_+;circRNA_0939|Chr10:45771832_45778634_-;circRNA_5525|Chr6:10961830_10979314_+
GO:0005634	nucleus	cellular_component	cell|cell part|organelle	144	371	2501	6672	0.311358	0.807299	1.03545	circRNA_6107|Chr7:76837537_76845975_-;circRNA_2766|Chr17:76245627_76265943_-;circRNA_4183|Chr3:59075644_59085278_+;circRNA_1267|Chr10:109754906_109755050_+;circRNA_2493|Chr16:19805426_19805902_+;circRNA_2299|Chr15:38661026_38709984_-;circRNA_3621|Chr2:184309074_184309661_-;circRNA_1188|Chr10:89036545_89074755_+;circRNA_2259|Chr15:24024429_24032402_-;circRNA_2378|Chr15:70098761_70139170_-;circRNA_…
GO:0005635	nuclear envelope	cellular_component	cell|cell part|organelle|organelle part	2	371	77	6672	0.933495	0.971878	0.467112	circRNA_6007|Chr7:52310713_52318397_-;circRNA_2985|Chr18:51805551_51807909_+
GO:0005637	nuclear inner membrane	cellular_component	cell|cell part|membrane|organelle|organelle part	2	371	15	6672	0.201552	0.807299	2.39784	circRNA_2985|Chr18:51805551_51807909_+;circRNA_3152|Chr19:32214551_32215127_+
GO:0005654	nucleoplasm	cellular_component	cell|cell part|membrane-enclosed lumen|organelle|organelle part	58	371	1179	6672	0.871389	0.939635	0.884701	circRNA_6107|Chr7:76837537_76845975_-;circRNA_6568|Chr8:93334030_93350656_-;circRNA_2299|Chr15:38661026_38709984_-;circRNA_3621|Chr2:184309074_184309661_-;circRNA_0233|Chr1:128239552_128243030_-;circRNA_0052|Chr1:20961258_20962540_-;circRNA_4669|Chr4:64894605_64899587_-;circRNA_1261|Chr10:108486117_108494849_+;circRNA_0763|Chr1:274700623_274701534_+;circRNA_2360|Chr15:57348405_57351717_+;circRNA_…
GO:0005657	replication fork	cellular_component	cell|cell part|organelle|organelle part	1	371	10	6672	0.435893	0.807299	1.79838	circRNA_5752|Chr6:102510293_102512499_+
GO:0005667	transcription factor complex	cellular_component	cell|cell part|macromolecular complex	11	371	131	6672	0.111547	0.807299	1.51009	circRNA_0233|Chr1:128239552_128243030_-;circRNA_3225|Chr19:42917629_42920390_-;circRNA_3203|Chr19:38057557_38062193_+;circRNA_5617|Chr6:41822551_41830656_-;circRNA_4927|Chr4:170518672_170520365_+;circRNA_0375|Chr1:177651557_177654228_+;circRNA_6753|Chr9:18653895_18660843_+;circRNA_3223|Chr19:42856166_42920390_-;circRNA_2849|Chr18:2445774_2446986_+;circRNA_3152|Chr19:32214551_32215127_+;circRNA_30…
GO:0005671	Ada2/Gcn5/Ada3 transcription activator complex	cellular_component	cell|cell part|macromolecular complex|membrane-enclosed lumen|organelle|organelle part	3	371	16	6672	0.0556899	0.624153	3.37197	circRNA_3847|Chr2:257626382_257629063_+;circRNA_3675|Chr2:189383399_189395748_-;circRNA_1458|Chr11:84571220_84583542_-
GO:0005681	spliceosomal complex	cellular_component	cell|cell part|macromolecular complex|organelle|organelle part	1	371	16	6672	0.60006	0.842385	1.12399	circRNA_3639|Chr2:188055409_188056256_+
GO:0005694	chromosome	cellular_component	cell|cell part|organelle	1	371	46	6672	0.928703	0.968667	0.390953	circRNA_2690|Chr17:29730437_29737981_-
GO:0005720	nuclear heterochromatin	cellular_component	cell|cell part|membrane-enclosed lumen|organelle|organelle part	1	371	10	6672	0.435893	0.807299	1.79838	circRNA_2278|Chr15:36934315_36940208_+
GO:0005721	pericentric heterochromatin	cellular_component	cell|cell part|organelle|organelle part	1	371	18	6672	0.643406	0.848633	0.999102	circRNA_5163|Chr5:90817794_90827570_+
GO:0005730	nucleolus	cellular_component	cell|cell part|membrane-enclosed lumen|organelle|organelle part	26	371	369	6672	0.123853	0.807299	1.26715	circRNA_3621|Chr2:184309074_184309661_-;circRNA_5775|Chr6:108797786_108802113_+;circRNA_1636|Chr12:38305355_38317018_+;circRNA_0544|Chr1:220039308_220042767_-;circRNA_4054|Chr3:7456433_7475230_+;circRNA_1346|Chr11:34865447_34879143_+;circRNA_1447|Chr11:81375744_81376852_-;circRNA_3847|Chr2:257626382_257629063_+;circRNA_2614|Chr17:5511386_5548199_+;circRNA_0547|Chr1:220042074_220049075_-;circRNA_1…
GO:0005737	cytoplasm	cellular_component	cell|cell part	133	371	2317	6672	0.339046	0.807299	1.0323	circRNA_6256|Chr7:143274109_143324536_-;circRNA_6107|Chr7:76837537_76845975_-;circRNA_6568|Chr8:93334030_93350656_-;circRNA_2766|Chr17:76245627_76265943_-;circRNA_3745|Chr2:210808354_210822401_-;circRNA_5266|Chr5:127620259_127635191_-;circRNA_4183|Chr3:59075644_59085278_+;circRNA_2493|Chr16:19805426_19805902_+;circRNA_1738|Chr13:52667988_52673721_+;circRNA_3744|Chr2:210806416_210806638_+;circRNA_…
GO:0005739	mitochondrion	cellular_component	cell|cell part|organelle	16	371	430	6672	0.97199	0.986419	0.669166	circRNA_6157|Chr7:116072198_116158807_-;circRNA_4561|Chr4:22084945_22091386_+;circRNA_4593|Chr4:31220330_31319352_+;circRNA_3621|Chr2:184309074_184309661_-;circRNA_3885|Chr20:4896892_4921063_-;circRNA_2614|Chr17:5511386_5548199_+;circRNA_2113|Chr14:82239645_82240095_+;circRNA_6574|Chr8:94283953_94292111_-;circRNA_1093|Chr10:72203091_72212546_+;circRNA_0728|Chr1:263249208_263253633_-;circRNA_3773|…
GO:0005741	mitochondrial outer membrane	cellular_component	cell|cell part|membrane|organelle|organelle part	2	371	36	6672	0.602942	0.844119	0.999102	circRNA_5617|Chr6:41822551_41830656_-;circRNA_1093|Chr10:72203091_72212546_+
GO:0005743	mitochondrial inner membrane	cellular_component	cell|cell part|membrane|organelle|organelle part	3	371	67	6672	0.72854	0.878053	0.805246	circRNA_6157|Chr7:116072198_116158807_-;circRNA_4593|Chr4:31220330_31319352_+;circRNA_2113|Chr14:82239645_82240095_+
GO:0005759	mitochondrial matrix	cellular_component	cell|cell part|membrane-enclosed lumen|organelle|organelle part	1	371	41	6672	0.90491	0.957673	0.43863	circRNA_3885|Chr20:4896892_4921063_-
GO:0005764	lysosome	cellular_component	cell|cell part|organelle	3	371	83	6672	0.848463	0.925104	0.650018	circRNA_0728|Chr1:263249208_263253633_-;circRNA_5380|Chr5:149062724_149065190_+;circRNA_6067|Chr7:72043294_72073470_+
GO:0005765	lysosomal membrane	cellular_component	cell|cell part|membrane|organelle|organelle part	3	371	52	6672	0.558771	0.832273	1.03753	circRNA_1261|Chr10:108486117_108494849_+;circRNA_4837|Chr4:140870957_140872418_+;circRNA_3876|Chr20:4095939_4118506_+
GO:0005768	endosome	cellular_component	cell|cell part|organelle	5	371	181	6672	0.97636	0.98792	0.496791	circRNA_0290|Chr1:154405931_154425509_+;circRNA_3514|Chr2:113744312_113745181_+;circRNA_3080|Chr18:77484239_77520779_-;circRNA_3074|Chr18:77466020_77520779_-;circRNA_3686|Chr2:195768840_195795666_-
GO:0005769	early endosome	cellular_component	cell|cell part|organelle	3	371	170	6672	0.996656	0.998589	0.317362	circRNA_0290|Chr1:154405931_154425509_+;circRNA_3733|Chr2:208198684_208203924_-;circRNA_3686|Chr2:195768840_195795666_-
GO:0005770	late endosome	cellular_component	cell|cell part|organelle	1	371	83	6672	0.991594	0.996518	0.216673	circRNA_3733|Chr2:208198684_208203924_-
GO:0005774	vacuolar membrane	cellular_component	cell|cell part|membrane|organelle|organelle part	1	371	24	6672	0.74729	0.883396	0.749326	circRNA_0357|Chr1:175200414_175218889_-
GO:0005777	peroxisome	cellular_component	cell|cell part|organelle	2	371	37	6672	0.618011	0.847573	0.972099	circRNA_4561|Chr4:22084945_22091386_+;circRNA_3773|Chr2:225348168_225352508_-
GO:0005778	peroxisomal membrane	cellular_component	cell|cell part|membrane|organelle|organelle part	1	371	9	6672	0.402631	0.807299	1.9982	circRNA_3773|Chr2:225348168_225352508_-
GO:0005782	peroxisomal matrix	cellular_component	cell|cell part|membrane-enclosed lumen|organelle|organelle part	1	371	15	6672	0.576456	0.832613	1.19892	circRNA_3773|Chr2:225348168_225352508_-
GO:0005783	endoplasmic reticulum	cellular_component	cell|cell part|organelle	14	371	383	6672	0.96949	0.984873	0.657372	circRNA_3621|Chr2:184309074_184309661_-;circRNA_4669|Chr4:64894605_64899587_-;circRNA_1261|Chr10:108486117_108494849_+;circRNA_1147|Chr10:82752455_82752793_+;circRNA_2052|Chr14:44440261_44456717_+;circRNA_5902|Chr6:144189453_144275272_+;circRNA_0734|Chr1:264001511_264066989_+;circRNA_3966|Chr20:27756685_27757153_-;circRNA_3509|Chr2:113189774_113198013_-;circRNA_2177|Chr14:107594175_107594869_-;ci…
GO:0005788	endoplasmic reticulum lumen	cellular_component	cell|cell part|membrane-enclosed lumen|organelle|organelle part	1	371	13	6672	0.524998	0.816973	1.38337	circRNA_6066|Chr7:71069214_71077102_+
GO:0005789	endoplasmic reticulum membrane	cellular_component	cell|cell part|membrane|membrane part|organelle|organelle part	13	371	156	6672	0.0931312	0.778773	1.49865	circRNA_1993|Chr14:22619364_22655924_+;circRNA_3170|Chr19:33010738_33073342_-;circRNA_5223|Chr5:115146569_115199307_-;circRNA_4669|Chr4:64894605_64899587_-;circRNA_3585|Chr2:154520979_154532393_-;circRNA_2052|Chr14:44440261_44456717_+;circRNA_0734|Chr1:264001511_264066989_+;circRNA_1955|Chr14:9421418_9440942_-;circRNA_3514|Chr2:113744312_113745181_+;circRNA_4948|Chr4:180711145_180722357_-;circRNA…
GO:0005791	rough endoplasmic reticulum	cellular_component	cell|cell part|organelle	1	371	29	6672	0.810378	0.91232	0.620132	circRNA_4853|Chr4:147948449_147949383_-
GO:0005793	endoplasmic reticulum-Golgi intermediate compartment	cellular_component	cell|cell part|organelle	2	371	23	6672	0.368635	0.807299	1.56381	circRNA_6937|Chr9:78945266_78947892_-;circRNA_6935|Chr9:78911759_78911926_+
GO:0005794	Golgi apparatus	cellular_component	cell|cell part|organelle	23	371	564	6672	0.960355	0.980685	0.733383	circRNA_6242|Chr7:140415833_140417547_-;circRNA_3621|Chr2:184309074_184309661_-;circRNA_1261|Chr10:108486117_108494849_+;circRNA_1147|Chr10:82752455_82752793_+;circRNA_4054|Chr3:7456433_7475230_+;circRNA_6241|Chr7:140415223_140417547_-;circRNA_0290|Chr1:154405931_154425509_+;circRNA_3966|Chr20:27756685_27757153_-;circRNA_2177|Chr14:107594175_107594869_-;circRNA_2819|Chr17:87758882_87760775_-;circ…
GO:0005795	Golgi stack	cellular_component	cell|cell part|organelle|organelle part	1	371	18	6672	0.643406	0.848633	0.999102	circRNA_1983|Chr14:17407714_17408515_-
GO:0005802	trans-Golgi network	cellular_component	cell|cell part|organelle|organelle part	4	371	127	6672	0.928995	0.968667	0.56642	circRNA_5962|Chr7:29284390_29288495_+;circRNA_3080|Chr18:77484239_77520779_-;circRNA_3074|Chr18:77466020_77520779_-;circRNA_4954|Chr4:181910549_181913546_+
GO:0005813	centrosome	cellular_component	cell|cell part|organelle|organelle part	9	371	301	6672	0.988772	0.99508	0.537722	circRNA_1188|Chr10:89036545_89074755_+;circRNA_6772|Chr9:26636334_26669699_-;circRNA_4795|Chr4:117422680_117436312_+;circRNA_6001|Chr7:51425330_51432888_-;circRNA_2847|Chr18:2018381_2018553_-;circRNA_5003|Chr5:8794167_8810643_-;circRNA_0716|Chr1:259479327_259489683_-;circRNA_3556|Chr2:128642780_128668115_-;circRNA_1270|Chr10:110157631_110164041_-
GO:0005814	centriole	cellular_component	cell|cell part|organelle|organelle part	2	371	64	6672	0.878701	0.94429	0.561995	circRNA_4795|Chr4:117422680_117436312_+;circRNA_3556|Chr2:128642780_128668115_-
GO:0005815	microtubule organizing center	cellular_component	cell|cell part|organelle|organelle part	3	371	97	6672	0.912699	0.96244	0.556201	circRNA_2432|Chr16:2138232_2142317_-;circRNA_5386|Chr5:150382262_150383814_-;circRNA_2726|Chr17:54209230_54209739_+
GO:0005819	spindle	cellular_component	cell|cell part|organelle|organelle part	3	371	38	6672	0.35474	0.807299	1.41978	circRNA_1188|Chr10:89036545_89074755_+;circRNA_5003|Chr5:8794167_8810643_-;circRNA_1270|Chr10:110157631_110164041_-
GO:0005829	cytosol	cellular_component	cell|cell part	91	371	1869	6672	0.946354	0.974936	0.875617	circRNA_6107|Chr7:76837537_76845975_-;circRNA_2766|Chr17:76245627_76265943_-;circRNA_3745|Chr2:210808354_210822401_-;circRNA_4897|Chr4:157436084_157436365_-;circRNA_4183|Chr3:59075644_59085278_+;circRNA_1267|Chr10:109754906_109755050_+;circRNA_3744|Chr2:210806416_210806638_+;circRNA_0613|Chr1:242716557_242737019_-;circRNA_1547|Chr12:13717791_13718009_-;circRNA_3738|Chr2:210723584_210806489_-;circ…
GO:0005834	heterotrimeric G-protein complex	cellular_component	cell|cell part|macromolecular complex|membrane|membrane part	1	371	11	6672	0.467307	0.807299	1.63489	circRNA_0591|Chr1:233578229_233581182_+
GO:0005840	ribosome	cellular_component	cell|cell part|macromolecular complex|organelle	1	371	30	6672	0.820968	0.913126	0.599461	circRNA_5806|Chr6:124625936_124680274_-
GO:0005844	polysome	cellular_component	cell|cell part|macromolecular complex	2	371	21	6672	0.327422	0.807299	1.71275	circRNA_2766|Chr17:76245627_76265943_-;circRNA_2768|Chr17:76260636_76265943_-
GO:0005852	eukaryotic translation initiation factor 3 complex	cellular_component	cell|cell part|macromolecular complex	2	371	5	6672	0.0275678	0.495978	7.19353	circRNA_0432|Chr1:197981834_197983786_-;circRNA_0433|Chr1:197981834_197983858_-
GO:0005856	cytoskeleton	cellular_component	cell|cell part|organelle	11	371	176	6672	0.388999	0.807299	1.12399	circRNA_1547|Chr12:13717791_13718009_-;circRNA_0052|Chr1:20961258_20962540_-;circRNA_0649|Chr1:252537818_252539458_-;circRNA_6953|Chr9:82558343_82558587_+;circRNA_4139|Chr3:45365578_45372679_+;circRNA_1346|Chr11:34865447_34879143_+;circRNA_1349|Chr11:34879058_34932316_+;circRNA_2411|Chr15:106417736_106434369_+;circRNA_0716|Chr1:259479327_259489683_-;circRNA_0650|Chr1:252537894_252539495_+;circRNA…
GO:0005861	troponin complex	cellular_component	cell|cell part|macromolecular complex|organelle|organelle part	1	371	5	6672	0.248846	0.807299	3.59677	circRNA_1738|Chr13:52667988_52673721_+
GO:0005865	striated muscle thin filament	cellular_component	cell|cell part|organelle|organelle part	1	371	11	6672	0.467307	0.807299	1.63489	circRNA_1738|Chr13:52667988_52673721_+
GO:0005871	kinesin complex	cellular_component	cell|cell part|macromolecular complex|organelle|organelle part	2	371	28	6672	0.466633	0.807299	1.28456	circRNA_1867|Chr13:97022518_97023051_-;circRNA_2726|Chr17:54209230_54209739_+
GO:0005874	microtubule	cellular_component	cell|cell part|organelle|organelle part	7	371	131	6672	0.598776	0.842385	0.960968	circRNA_1188|Chr10:89036545_89074755_+;circRNA_1867|Chr13:97022518_97023051_-;circRNA_1255|Chr10:106264856_106265494_+;circRNA_1346|Chr11:34865447_34879143_+;circRNA_1349|Chr11:34879058_34932316_+;circRNA_5003|Chr5:8794167_8810643_-;circRNA_2726|Chr17:54209230_54209739_+
GO:0005876	spindle microtubule	cellular_component	cell|cell part|organelle|organelle part	3	371	13	6672	0.0321534	0.531828	4.15011	circRNA_1188|Chr10:89036545_89074755_+;circRNA_2275|Chr15:36823412_36828644_+;circRNA_1270|Chr10:110157631_110164041_-
GO:0005881	cytoplasmic microtubule	cellular_component	cell|cell part|organelle|organelle part	3	371	19	6672	0.085342	0.732146	2.83955	circRNA_1188|Chr10:89036545_89074755_+;circRNA_2865|Chr18:6047215_6051719_-;circRNA_1591|Chr12:25226326_25234184_+
GO:0005882	intermediate filament	cellular_component	cell|cell part|organelle|organelle part	5	371	24	6672	0.00914593	0.329093	3.74663	circRNA_6256|Chr7:143274109_143324536_-;circRNA_5368|Chr5:147482283_147483432_+;circRNA_6953|Chr9:82558343_82558587_+;circRNA_1185|Chr10:88046855_88047023_+;circRNA_6952|Chr9:82557123_82558587_+
GO:0005883	neurofilament	cellular_component	cell|cell part|organelle|organelle part	2	371	17	6672	0.243383	0.807299	2.11574	circRNA_1346|Chr11:34865447_34879143_+;circRNA_1349|Chr11:34879058_34932316_+
GO:0005884	actin filament	cellular_component	cell|cell part|organelle|organelle part	4	371	61	6672	0.44266	0.807299	1.17927	circRNA_4658|Chr4:62270233_62272586_+;circRNA_1346|Chr11:34865447_34879143_+;circRNA_5414|Chr5:157690578_157712883_+;circRNA_1349|Chr11:34879058_34932316_+
GO:0005886	plasma membrane	cellular_component	cell|cell part|membrane	58	371	1314	6672	0.9837	0.992409	0.793807	circRNA_6258|Chr7:143316920_143324536_-;circRNA_1249|Chr10:103586432_103677527_-;circRNA_1942|Chr14:5870915_5943886_+;circRNA_3170|Chr19:33010738_33073342_-;circRNA_3844|Chr2:256682926_256683075_+;circRNA_1547|Chr12:13717791_13718009_-;circRNA_4863|Chr4:151118221_151123637_-;circRNA_4712|Chr4:72054491_72089003_-;circRNA_6219|Chr7:130522030_130524289_+;circRNA_1878|Chr13:100347405_100353039_-;circ…
GO:0005887	integral component of plasma membrane	cellular_component	cell|cell part|membrane|membrane part	14	371	181	6672	0.130957	0.807299	1.39101	circRNA_4346|Chr3:122130941_122141403_+;circRNA_4403|Chr3:145092634_145129362_+;circRNA_1261|Chr10:108486117_108494849_+;circRNA_3585|Chr2:154520979_154532393_-;circRNA_4402|Chr3:145092634_145098350_+;circRNA_5902|Chr6:144189453_144275272_+;circRNA_5227|Chr5:117024123_117030956_-;circRNA_5986|Chr7:41167312_41167751_+;circRNA_2459|Chr16:7226824_7229432_-;circRNA_3477|Chr2:80226167_80234308_+;circR…
GO:0005891	voltage-gated calcium channel complex	cellular_component	cell|cell part|macromolecular complex|membrane|membrane part	1	371	20	6672	0.682064	0.858756	0.899191	circRNA_4863|Chr4:151118221_151123637_-
GO:0005899	insulin receptor complex	cellular_component	cell|cell part|macromolecular complex|membrane|membrane part	1	371	34	6672	0.857748	0.931308	0.528936	circRNA_0716|Chr1:259479327_259489683_-
GO:0005901	caveola	cellular_component	cell|cell part|membrane|membrane part	1	371	50	6672	0.943382	0.974749	0.359677	circRNA_0591|Chr1:233578229_233581182_+
GO:0005903	brush border	cellular_component	cell|cell part	2	371	69	6672	0.903462	0.957673	0.52127	circRNA_7047|Chr9:119309035_119311107_-;circRNA_5414|Chr5:157690578_157712883_+
GO:0005905	clathrin-coated pit	cellular_component	cell|cell part|membrane|membrane part	3	371	43	6672	0.431145	0.807299	1.25469	circRNA_0290|Chr1:154405931_154425509_+;circRNA_1315|Chr11:31974630_31979720_+;circRNA_0028|Chr1:13262070_13268495_+
GO:0005911	cell-cell junction	cellular_component	cell junction	8	371	144	6672	0.553568	0.827968	0.999102	circRNA_6953|Chr9:82558343_82558587_+;circRNA_4139|Chr3:45365578_45372679_+;circRNA_3283|Chr19:61714402_61714542_+;circRNA_3373|Chr2:30564530_30566431_-;circRNA_6103|Chr7:76114791_76119201_+;circRNA_6919|Chr9:71920586_71955010_+;circRNA_6917|Chr9:71915420_71927987_+;circRNA_6952|Chr9:82557123_82558587_+
GO:0005912	adherens junction	cellular_component	cell junction	1	371	61	6672	0.969987	0.984873	0.294817	circRNA_3283|Chr19:61714402_61714542_+
GO:0005913	cell-cell adherens junction	cellular_component	cell junction	4	371	100	6672	0.815183	0.913126	0.719353	circRNA_0613|Chr1:242716557_242737019_-;circRNA_0716|Chr1:259479327_259489683_-;circRNA_6894|Chr9:67242046_67257543_+;circRNA_0609|Chr1:242607845_242631822_-
GO:0005914	spot adherens junction	cellular_component	cell junction	2	371	7	6672	0.0537688	0.612665	5.13824	circRNA_0613|Chr1:242716557_242737019_-;circRNA_0609|Chr1:242607845_242631822_-
GO:0005916	fascia adherens	cellular_component	cell junction	2	371	12	6672	0.140942	0.807299	2.9973	circRNA_6953|Chr9:82558343_82558587_+;circRNA_6952|Chr9:82557123_82558587_+
GO:0005921	gap junction	cellular_component	cell junction	2	371	12	6672	0.140942	0.807299	2.9973	circRNA_6953|Chr9:82558343_82558587_+;circRNA_6952|Chr9:82557123_82558587_+
GO:0005923	bicellular tight junction	cellular_component	cell junction	1	371	69	6672	0.981097	0.991246	0.260635	circRNA_3373|Chr2:30564530_30566431_-
GO:0005924	cell-substrate adherens junction	cellular_component	cell junction	1	371	31	6672	0.830968	0.917779	0.580123	circRNA_0716|Chr1:259479327_259489683_-
GO:0005925	focal adhesion	cellular_component	cell junction	10	371	179	6672	0.541247	0.825583	1.00468	circRNA_0613|Chr1:242716557_242737019_-;circRNA_1547|Chr12:13717791_13718009_-;circRNA_2146|Chr14:88724076_88725530_-;circRNA_1878|Chr13:100347405_100353039_-;circRNA_6391|Chr8:60917720_60920949_-;circRNA_3283|Chr19:61714402_61714542_+;circRNA_0716|Chr1:259479327_259489683_-;circRNA_1443|Chr11:79555990_79611741_-;circRNA_2151|Chr14:88786305_88792540_-;circRNA_0609|Chr1:242607845_242631822_-
GO:0005929	cilium	cellular_component	cell|cell part|organelle	3	371	77	6672	0.810181	0.91232	0.700669	circRNA_6772|Chr9:26636334_26669699_-;circRNA_0102|Chr1:47030544_47032563_+;circRNA_0857|Chr10:13944932_13945211_+
GO:0005930	axoneme	cellular_component	cell|cell part|organelle|organelle part	1	371	35	6672	0.865698	0.93499	0.513824	circRNA_1255|Chr10:106264856_106265494_+
GO:0005938	cell cortex	cellular_component	cell|cell part	2	371	123	6672	0.993109	0.996518	0.29242	circRNA_0447|Chr1:200606971_200615170_-;circRNA_4948|Chr4:180711145_180722357_-
GO:0005975	carbohydrate metabolic process	biological_process	metabolic process	2	371	17	6672	0.243383	0.807299	2.11574	circRNA_2887|Chr18:15480332_15494701_+;circRNA_2472|Chr16:8396763_8400882_+
GO:0005978	glycogen biosynthetic process	biological_process	cellular process|metabolic process	2	371	10	6672	0.103274	0.787414	3.59677	circRNA_0613|Chr1:242716557_242737019_-;circRNA_0609|Chr1:242607845_242631822_-
GO:0006006	glucose metabolic process	biological_process	metabolic process	2	371	21	6672	0.327422	0.807299	1.71275	circRNA_0613|Chr1:242716557_242737019_-;circRNA_0609|Chr1:242607845_242631822_-
GO:0006082	organic acid metabolic process	biological_process	cellular process|metabolic process	1	371	6	6672	0.290646	0.807299	2.9973	circRNA_5223|Chr5:115146569_115199307_-
GO:0006091	generation of precursor metabolites and energy	biological_process	cellular process|metabolic process	1	371	12	6672	0.496977	0.810254	1.49865	circRNA_4561|Chr4:22084945_22091386_+
GO:0006166	purine ribonucleoside salvage	biological_process	cellular process|metabolic process	1	371	6	6672	0.290646	0.807299	2.9973	circRNA_2222|Chr15:3233141_3293913_-
GO:0006167	AMP biosynthetic process	biological_process	cellular process|metabolic process	1	371	8	6672	0.367413	0.807299	2.24798	circRNA_2222|Chr15:3233141_3293913_-
GO:0006211	5-methylcytosine catabolic process	biological_process	cellular process|metabolic process	3	371	8	6672	0.0077439	0.293409	6.74394	circRNA_4773|Chr4:115104274_115142108_-;circRNA_3815|Chr2:238742934_238746181_-;circRNA_4771|Chr4:115104274_115106424_-
GO:0006260	DNA replication	biological_process	cellular process|metabolic process	1	371	27	6672	0.787287	0.903596	0.666068	circRNA_4448|Chr3:156690910_156699465_+
GO:0006261	DNA-dependent DNA replication	biological_process	cellular process|metabolic process	1	371	7	6672	0.330125	0.807299	2.56912	circRNA_2259|Chr15:24024429_24032402_-
GO:0006265	DNA topological change	biological_process	cellular component organization or biogenesis|cellular process|metabolic process	1	371	6	6672	0.290646	0.807299	2.9973	circRNA_4448|Chr3:156690910_156699465_+
GO:0006281	DNA repair	biological_process	cellular process|metabolic process|response to stimulus	5	371	92	6672	0.58635	0.842385	0.977382	circRNA_6107|Chr7:76837537_76845975_-;circRNA_2493|Chr16:19805426_19805902_+;circRNA_2259|Chr15:24024429_24032402_-;circRNA_6934|Chr9:78341845_78350281_-;circRNA_5526|Chr6:11219826_11221789_-
GO:0006282	regulation of DNA repair	biological_process	biological regulation|cellular process|metabolic process|regulation of biological process|response to stimulus	1	371	5	6672	0.248846	0.807299	3.59677	circRNA_2472|Chr16:8396763_8400882_+
GO:0006298	mismatch repair	biological_process	cellular process|metabolic process|response to stimulus	1	371	8	6672	0.367413	0.807299	2.24798	circRNA_5526|Chr6:11219826_11221789_-
GO:0006301	postreplication repair	biological_process	cellular process|metabolic process|response to stimulus	1	371	6	6672	0.290646	0.807299	2.9973	circRNA_5526|Chr6:11219826_11221789_-
GO:0006302	double-strand break repair	biological_process	cellular process|metabolic process|response to stimulus	1	371	40	6672	0.899275	0.954665	0.449596	circRNA_5526|Chr6:11219826_11221789_-
GO:0006306	DNA methylation	biological_process	cellular process|metabolic process	1	371	30	6672	0.820968	0.913126	0.599461	circRNA_4927|Chr4:170518672_170520365_+
GO:0006325	chromatin organization	biological_process	cellular component organization or biogenesis|cellular process	1	371	57	6672	0.962191	0.980685	0.315506	circRNA_2388|Chr15:70790038_70832121_+
GO:0006338	chromatin remodeling	biological_process	cellular component organization or biogenesis|cellular process	4	371	83	6672	0.685894	0.860995	0.86669	circRNA_1231|Chr10:95327724_95328546_-;circRNA_4448|Chr3:156690910_156699465_+;circRNA_5450|Chr5:167486001_167547741_+;circRNA_7065|ChrX:4819220_4832241_-
GO:0006342	chromatin silencing	biological_process	biological regulation|cellular component organization or biogenesis|cellular process|metabolic process|negative regulation of biological process|regulation of biological process	3	371	11	6672	0.0201439	0.480409	4.90468	circRNA_1551|Chr12:13879069_13884323_+;circRNA_6243|Chr7:140533891_140536242_-;circRNA_6742|Chr9:16036525_16039832_+
GO:0006351	transcription, DNA-templated	biological_process	cellular process|metabolic process	11	371	238	6672	0.780134	0.899413	0.831185	circRNA_1658|Chr12:43576497_43576734_-;circRNA_2299|Chr15:38661026_38709984_-;circRNA_0233|Chr1:128239552_128243030_-;circRNA_1957|Chr14:10786399_10787114_+;circRNA_1959|Chr14:10786399_10794860_+;circRNA_1231|Chr10:95327724_95328546_-;circRNA_5778|Chr6:108862383_108883917_+;circRNA_4829|Chr4:131439626_131453028_-;circRNA_2690|Chr17:29730437_29737981_-;circRNA_2278|Chr15:36934315_36940208_+;circRN…
GO:0006355	regulation of transcription, DNA-templated	biological_process	biological regulation|cellular process|metabolic process|regulation of biological process	24	371	432	6672	0.533995	0.825583	0.999102	circRNA_2299|Chr15:38661026_38709984_-;circRNA_3621|Chr2:184309074_184309661_-;circRNA_7114|ChrX:35344847_35352097_-;circRNA_0233|Chr1:128239552_128243030_-;circRNA_3087|Chr18:79813606_79815529_+;circRNA_2943|Chr18:31445709_31446694_-;circRNA_4186|Chr3:59678949_59680308_-;circRNA_1957|Chr14:10786399_10787114_+;circRNA_3203|Chr19:38057557_38062193_+;circRNA_1959|Chr14:10786399_10794860_+;circRNA_3…
GO:0006357	regulation of transcription by RNA polymerase II	biological_process	biological regulation|cellular process|metabolic process|regulation of biological process	13	371	225	6672	0.484854	0.810254	1.03907	circRNA_1658|Chr12:43576497_43576734_-;circRNA_4186|Chr3:59678949_59680308_-;circRNA_1272|Chr10:110495072_110500097_+;circRNA_5150|Chr5:76925720_76926914_+;circRNA_3458|Chr2:57539193_57544062_-;circRNA_1286|Chr11:3142305_3142832_+;circRNA_2284|Chr15:37190896_37218085_+;circRNA_6103|Chr7:76114791_76119201_+;circRNA_6753|Chr9:18653895_18660843_+;circRNA_5163|Chr5:90817794_90827570_+;circRNA_2372|Ch…
GO:0006366	transcription by RNA polymerase II	biological_process	cellular process|metabolic process	18	371	234	6672	0.0999644	0.787414	1.38337	circRNA_0233|Chr1:128239552_128243030_-;circRNA_3087|Chr18:79813606_79815529_+;circRNA_4669|Chr4:64894605_64899587_-;circRNA_4697|Chr4:66567829_66568912_-;circRNA_6915|Chr9:70787138_70787910_-;circRNA_1272|Chr10:110495072_110500097_+;circRNA_3203|Chr19:38057557_38062193_+;circRNA_0185|Chr1:93851663_93853240_-;circRNA_1897|Chr13:106507146_106507561_+;circRNA_6103|Chr7:76114791_76119201_+;circRNA_0…
GO:0006376	mRNA splice site selection	biological_process	cellular component organization or biogenesis|cellular process|metabolic process	3	371	17	6672	0.0649315	0.671779	3.17362	circRNA_2759|Chr17:75295083_75352500_+;circRNA_3581|Chr2:150755405_150756431_+;circRNA_3639|Chr2:188055409_188056256_+
GO:0006378	mRNA polyadenylation	biological_process	cellular process|metabolic process	2	371	28	6672	0.466633	0.807299	1.28456	circRNA_5840|Chr6:129621583_129636485_+;circRNA_5844|Chr6:129641475_129660096_+
GO:0006396	RNA processing	biological_process	cellular process|metabolic process	2	371	18	6672	0.264453	0.807299	1.9982	circRNA_2259|Chr15:24024429_24032402_-;circRNA_5059|Chr5:48695038_48698976_+
GO:0006397	mRNA processing	biological_process	cellular process|metabolic process	2	371	89	6672	0.962516	0.980685	0.404131	circRNA_2410|Chr15:105687771_105688392_+;circRNA_2388|Chr15:70790038_70832121_+
GO:0006405	RNA export from nucleus	biological_process	establishment of localization|localization	1	371	13	6672	0.524998	0.816973	1.38337	circRNA_4062|Chr3:8887351_8892631_+
GO:0006406	mRNA export from nucleus	biological_process	establishment of localization|localization|metabolic process	1	371	17	6672	0.622353	0.847573	1.05787	circRNA_3237|Chr19:43265984_43294685_+
GO:0006413	translational initiation	biological_process	cellular process|metabolic process	4	371	27	6672	0.0599932	0.6545	2.66427	circRNA_0432|Chr1:197981834_197983786_-;circRNA_0433|Chr1:197981834_197983858_-;circRNA_1447|Chr11:81375744_81376852_-;circRNA_5413|Chr5:156506448_156517254_+
GO:0006414	translational elongation	biological_process	cellular process|metabolic process	1	371	10	6672	0.435893	0.807299	1.79838	circRNA_4808|Chr4:120295643_120298656_-
GO:0006458	'de novo' protein folding	biological_process	cellular process	2	371	11	6672	0.121747	0.807299	3.26979	circRNA_6919|Chr9:71920586_71955010_+;circRNA_6917|Chr9:71915420_71927987_+
GO:0006468	protein phosphorylation	biological_process	cellular process|metabolic process	12	371	384	6672	0.992265	0.996518	0.561995	circRNA_4183|Chr3:59075644_59085278_+;circRNA_4347|Chr3:122318077_122318825_+;circRNA_4697|Chr4:66567829_66568912_-;circRNA_3572|Chr2:144876416_144917472_+;circRNA_6391|Chr8:60917720_60920949_-;circRNA_0038|Chr1:15545013_15551204_+;circRNA_1346|Chr11:34865447_34879143_+;circRNA_5806|Chr6:124625936_124680274_-;circRNA_1349|Chr11:34879058_34932316_+;circRNA_1270|Chr10:110157631_110164041_-;circRNA_…
GO:0006469	negative regulation of protein kinase activity	biological_process	biological regulation|cellular process|metabolic process|negative regulation of biological process|regulation of biological process	2	371	58	6672	0.841323	0.919804	0.620132	circRNA_0591|Chr1:233578229_233581182_+;circRNA_7247|ChrX:157322637_157323315_+
GO:0006470	protein dephosphorylation	biological_process	cellular process|metabolic process	3	371	97	6672	0.912699	0.96244	0.556201	circRNA_6001|Chr7:51425330_51432888_-;circRNA_0647|Chr1:251455609_251485480_+;circRNA_1029|Chr10:62751173_62767418_-
GO:0006471	protein ADP-ribosylation	biological_process	cellular process|metabolic process	1	371	10	6672	0.435893	0.807299	1.79838	circRNA_2439|Chr16:2354385_2354582_-
GO:0006486	protein glycosylation	biological_process	cellular process|metabolic process	2	371	35	6672	0.58743	0.842385	1.02765	circRNA_2887|Chr18:15480332_15494701_+;circRNA_2177|Chr14:107594175_107594869_-
GO:0006493	protein O-linked glycosylation	biological_process	cellular process|metabolic process	4	371	21	6672	0.0265205	0.495978	3.42549	circRNA_2177|Chr14:107594175_107594869_-;circRNA_4773|Chr4:115104274_115142108_-;circRNA_3815|Chr2:238742934_238746181_-;circRNA_4771|Chr4:115104274_115106424_-
GO:0006508	proteolysis	biological_process	metabolic process	9	371	136	6672	0.344095	0.807299	1.19011	circRNA_3791|Chr2:227687641_227700240_+;circRNA_1165|Chr10:85164768_85172858_-;circRNA_2614|Chr17:5511386_5548199_+;circRNA_3395|Chr2:34476081_34503654_+;circRNA_3850|Chr2:257937494_257945564_+;circRNA_3391|Chr2:34396320_34404958_+;circRNA_3390|Chr2:34373875_34404958_+;circRNA_6067|Chr7:72043294_72073470_+;circRNA_2599|Chr17:599906_610676_+
GO:0006511	ubiquitin-dependent protein catabolic process	biological_process	cellular process|metabolic process	2	371	151	6672	0.998383	0.999357	0.238196	circRNA_6407|Chr8:64171150_64184113_-;circRNA_6742|Chr9:16036525_16039832_+
GO:0006606	protein import into nucleus	biological_process	establishment of localization|localization	1	371	45	6672	0.924475	0.968385	0.399641	circRNA_4062|Chr3:8887351_8892631_+
GO:0006611	protein export from nucleus	biological_process	establishment of localization|localization	2	371	15	6672	0.201552	0.807299	2.39784	circRNA_2493|Chr16:19805426_19805902_+;circRNA_0857|Chr10:13944932_13945211_+
GO:0006622	protein targeting to lysosome	biological_process	establishment of localization|localization	1	371	22	6672	0.716542	0.871665	0.817447	circRNA_3332|Chr2:24067948_24083767_+
GO:0006623	protein targeting to vacuole	biological_process	establishment of localization|localization	1	371	18	6672	0.643406	0.848633	0.999102	circRNA_0594|Chr1:235750193_235761819_-
GO:0006629	lipid metabolic process	biological_process	metabolic process	4	371	36	6672	0.137406	0.807299	1.9982	circRNA_4795|Chr4:117422680_117436312_+;circRNA_5564|Chr6:25409775_25417047_-;circRNA_5617|Chr6:41822551_41830656_-;circRNA_0576|Chr1:226119298_226139368_-
GO:0006631	fatty acid metabolic process	biological_process	cellular process|metabolic process	1	371	18	6672	0.643406	0.848633	0.999102	circRNA_4561|Chr4:22084945_22091386_+
GO:0006633	fatty acid biosynthetic process	biological_process	cellular process|metabolic process	2	371	15	6672	0.201552	0.807299	2.39784	circRNA_0734|Chr1:264001511_264066989_+;circRNA_3773|Chr2:225348168_225352508_-
GO:0006635	fatty acid beta-oxidation	biological_process	cellular process|metabolic process	2	371	28	6672	0.466633	0.807299	1.28456	circRNA_4561|Chr4:22084945_22091386_+;circRNA_3773|Chr2:225348168_225352508_-
GO:0006636	unsaturated fatty acid biosynthetic process	biological_process	cellular process|metabolic process	1	371	7	6672	0.330125	0.807299	2.56912	circRNA_0576|Chr1:226119298_226139368_-
GO:0006644	phospholipid metabolic process	biological_process	cellular process|metabolic process	2	371	9	6672	0.0856728	0.732146	3.99641	circRNA_5564|Chr6:25409775_25417047_-;circRNA_2849|Chr18:2445774_2446986_+
GO:0006654	phosphatidic acid biosynthetic process	biological_process	cellular process|metabolic process	1	371	5	6672	0.248846	0.807299	3.59677	circRNA_3514|Chr2:113744312_113745181_+
GO:0006661	phosphatidylinositol biosynthetic process	biological_process	cellular process|metabolic process	1	371	5	6672	0.248846	0.807299	3.59677	circRNA_1955|Chr14:9421418_9440942_-
GO:0006688	glycosphingolipid biosynthetic process	biological_process	cellular process|metabolic process	1	371	5	6672	0.248846	0.807299	3.59677	circRNA_2887|Chr18:15480332_15494701_+
GO:0006749	glutathione metabolic process	biological_process	cellular process|metabolic process	3	371	15	6672	0.0471303	0.612459	3.59677	circRNA_3745|Chr2:210808354_210822401_-;circRNA_3744|Chr2:210806416_210806638_+;circRNA_3738|Chr2:210723584_210806489_-
GO:0006754	ATP biosynthetic process	biological_process	cellular process|metabolic process	1	371	8	6672	0.367413	0.807299	2.24798	circRNA_4593|Chr4:31220330_31319352_+
GO:0006805	xenobiotic metabolic process	biological_process	cellular process|metabolic process|response to stimulus	1	371	10	6672	0.435893	0.807299	1.79838	circRNA_5223|Chr5:115146569_115199307_-
GO:0006807	nitrogen compound metabolic process	biological_process	metabolic process	1	371	14	6672	0.551462	0.825583	1.28456	circRNA_0857|Chr10:13944932_13945211_+
GO:0006814	sodium ion transport	biological_process	establishment of localization|localization	3	371	21	6672	0.108099	0.801999	2.56912	circRNA_3170|Chr19:33010738_33073342_-;circRNA_4366|Chr3:124680315_124680563_-;circRNA_3168|Chr19:33010738_33064405_-
GO:0006816	calcium ion transport	biological_process	establishment of localization|localization	3	371	77	6672	0.810181	0.91232	0.700669	circRNA_4863|Chr4:151118221_151123637_-;circRNA_0857|Chr10:13944932_13945211_+;circRNA_4948|Chr4:180711145_180722357_-
GO:0006839	mitochondrial transport	biological_process	establishment of localization|localization	1	371	13	6672	0.524998	0.816973	1.38337	circRNA_4593|Chr4:31220330_31319352_+
GO:0006851	mitochondrial calcium ion transmembrane transport	biological_process	establishment of localization|localization	1	371	7	6672	0.330125	0.807299	2.56912	circRNA_2113|Chr14:82239645_82240095_+
GO:0006855	drug transmembrane transport	biological_process	establishment of localization|localization|response to stimulus	1	371	11	6672	0.467307	0.807299	1.63489	circRNA_1942|Chr14:5870915_5943886_+
GO:0006869	lipid transport	biological_process	establishment of localization|localization	2	371	40	6672	0.660573	0.852917	0.899191	circRNA_5902|Chr6:144189453_144275272_+;circRNA_4722|Chr4:80080131_80090153_-
GO:0006874	cellular calcium ion homeostasis	biological_process	biological regulation|cellular process	5	371	68	6672	0.326928	0.807299	1.32234	circRNA_4863|Chr4:151118221_151123637_-;circRNA_6772|Chr9:26636334_26669699_-;circRNA_3283|Chr19:61714402_61714542_+;circRNA_5986|Chr7:41167312_41167751_+;circRNA_5987|Chr7:41167312_41178782_+
GO:0006879	cellular iron ion homeostasis	biological_process	biological regulation|cellular process	3	371	24	6672	0.145993	0.807299	2.24798	circRNA_5523|Chr6:10920914_10923681_+;circRNA_5524|Chr6:10937102_10938824_+;circRNA_5525|Chr6:10961830_10979314_+
GO:0006886	intracellular protein transport	biological_process	establishment of localization|localization	10	371	169	6672	0.466852	0.807299	1.06413	circRNA_4403|Chr3:145092634_145129362_+;circRNA_4402|Chr3:145092634_145098350_+;circRNA_3620|Chr2:183555214_183558410_-;circRNA_4098|Chr3:21782079_21792112_+;circRNA_6811|Chr9:46123188_46125984_-;circRNA_1983|Chr14:17407714_17408515_-;circRNA_4094|Chr3:21721366_21736929_+;circRNA_3792|Chr2:230311167_230317038_-;circRNA_3686|Chr2:195768840_195795666_-;circRNA_1923|Chr14:2924636_2924865_+
GO:0006887	exocytosis	biological_process	cellular process|establishment of localization|localization	2	371	48	6672	0.755547	0.888553	0.749326	circRNA_3791|Chr2:227687641_227700240_+;circRNA_0939|Chr10:45771832_45778634_-
GO:0006888	ER to Golgi vesicle-mediated transport	biological_process	establishment of localization|localization	4	371	69	6672	0.539728	0.825583	1.04254	circRNA_4669|Chr4:64894605_64899587_-;circRNA_1983|Chr14:17407714_17408515_-;circRNA_3792|Chr2:230311167_230317038_-;circRNA_2528|Chr16:47896917_47910476_+
GO:0006890	retrograde vesicle-mediated transport, Golgi to ER	biological_process	establishment of localization|localization	5	371	36	6672	0.0471812	0.612459	2.49775	circRNA_6242|Chr7:140415833_140417547_-;circRNA_6241|Chr7:140415223_140417547_-;circRNA_2439|Chr16:2354385_2354582_-;circRNA_3080|Chr18:77484239_77520779_-;circRNA_3074|Chr18:77466020_77520779_-
GO:0006891	intra-Golgi vesicle-mediated transport	biological_process	establishment of localization|localization	1	371	15	6672	0.576456	0.832613	1.19892	circRNA_1983|Chr14:17407714_17408515_-
GO:0006897	endocytosis	biological_process	establishment of localization|localization	7	371	139	6672	0.661258	0.852917	0.90566	circRNA_0290|Chr1:154405931_154425509_+;circRNA_1315|Chr11:31974630_31979720_+;circRNA_2847|Chr18:2018381_2018553_-;circRNA_3080|Chr18:77484239_77520779_-;circRNA_1270|Chr10:110157631_110164041_-;circRNA_3074|Chr18:77466020_77520779_-;circRNA_1079|Chr10:71297308_71306105_+
GO:0006898	receptor-mediated endocytosis	biological_process	establishment of localization|localization	5	371	49	6672	0.134451	0.807299	1.83508	circRNA_0290|Chr1:154405931_154425509_+;circRNA_3791|Chr2:227687641_227700240_+;circRNA_2459|Chr16:7226824_7229432_-;circRNA_6919|Chr9:71920586_71955010_+;circRNA_6917|Chr9:71915420_71927987_+
GO:0006906	vesicle fusion	biological_process	cellular component organization or biogenesis|cellular process|establishment of localization|localization	1	371	45	6672	0.924475	0.968385	0.399641	circRNA_0939|Chr10:45771832_45778634_-
GO:0006911	phagocytosis, engulfment	biological_process	cellular component organization or biogenesis|cellular process|establishment of localization|localization	1	371	22	6672	0.716542	0.871665	0.817447	circRNA_4346|Chr3:122130941_122141403_+
GO:0006914	autophagy	biological_process	cellular process|metabolic process	1	371	51	6672	0.946554	0.974936	0.352624	circRNA_0594|Chr1:235750193_235761819_-
GO:0006915	apoptotic process	biological_process	cellular process	4	371	134	6672	0.945598	0.974936	0.536831	circRNA_7114|ChrX:35344847_35352097_-;circRNA_0233|Chr1:128239552_128243030_-;circRNA_2985|Chr18:51805551_51807909_+;circRNA_0758|Chr1:274628955_274647456_+
GO:0006919	activation of cysteine-type endopeptidase activity involved in apoptotic process	biological_process	biological regulation|cellular process|metabolic process|positive regulation of biological process|regulation of biological process	1	371	22	6672	0.716542	0.871665	0.817447	circRNA_1288|Chr11:10020678_10022991_+
GO:0006936	muscle contraction	biological_process	multicellular organismal process	5	371	37	6672	0.052171	0.612665	2.43025	circRNA_1738|Chr13:52667988_52673721_+;circRNA_0649|Chr1:252537818_252539458_-;circRNA_2432|Chr16:2138232_2142317_-;circRNA_4658|Chr4:62270233_62272586_+;circRNA_0650|Chr1:252537894_252539495_+
GO:0006937	regulation of muscle contraction	biological_process	biological regulation|multicellular organismal process|regulation of biological process	1	371	10	6672	0.435893	0.807299	1.79838	circRNA_1738|Chr13:52667988_52673721_+
GO:0006939	smooth muscle contraction	biological_process	multicellular organismal process	1	371	36	6672	0.873205	0.939635	0.499551	circRNA_4863|Chr4:151118221_151123637_-
GO:0006953	acute-phase response	biological_process	response to stimulus	2	371	6	6672	0.0398481	0.559784	5.99461	circRNA_6937|Chr9:78945266_78947892_-;circRNA_6935|Chr9:78911759_78911926_+
GO:0006954	inflammatory response	biological_process	response to stimulus	3	371	36	6672	0.32371	0.807299	1.49865	circRNA_2275|Chr15:36823412_36828644_+;circRNA_3367|Chr2:30384653_30433774_-;circRNA_3152|Chr19:32214551_32215127_+
GO:0006955	immune response	biological_process	immune system process|response to stimulus	1	371	35	6672	0.865698	0.93499	0.513824	circRNA_3876|Chr20:4095939_4118506_+
GO:0006974	cellular response to DNA damage stimulus	biological_process	cellular process|response to stimulus	7	371	142	6672	0.68311	0.859545	0.886527	circRNA_6107|Chr7:76837537_76845975_-;circRNA_3621|Chr2:184309074_184309661_-;circRNA_2259|Chr15:24024429_24032402_-;circRNA_3458|Chr2:57539193_57544062_-;circRNA_4508|Chr4:3972586_3976284_+;circRNA_5526|Chr6:11219826_11221789_-;circRNA_2472|Chr16:8396763_8400882_+
GO:0006978	DNA damage response, signal transduction by p53 class mediator resulting in transcription of p21 class mediator	biological_process	biological regulation|cellular process|regulation of biological process|response to stimulus|signaling	1	371	5	6672	0.248846	0.807299	3.59677	circRNA_4697|Chr4:66567829_66568912_-
GO:0006979	response to oxidative stress	biological_process	response to stimulus	1	371	57	6672	0.962191	0.980685	0.315506	circRNA_4366|Chr3:124680315_124680563_-
GO:0006986	response to unfolded protein	biological_process	response to stimulus	1	371	12	6672	0.496977	0.810254	1.49865	circRNA_3885|Chr20:4896892_4921063_-
GO:0006998	nuclear envelope organization	biological_process	cellular component organization or biogenesis|cellular process	1	371	17	6672	0.622353	0.847573	1.05787	circRNA_2493|Chr16:19805426_19805902_+
GO:0007004	telomere maintenance via telomerase	biological_process	biological regulation|cellular component organization or biogenesis|cellular process|metabolic process	1	371	8	6672	0.367413	0.807299	2.24798	circRNA_2275|Chr15:36823412_36828644_+
GO:0007005	mitochondrion organization	biological_process	cellular component organization or biogenesis|cellular process	3	371	49	6672	0.518067	0.816973	1.10105	circRNA_2614|Chr17:5511386_5548199_+;circRNA_6919|Chr9:71920586_71955010_+;circRNA_6917|Chr9:71915420_71927987_+
GO:0007010	cytoskeleton organization	biological_process	cellular component organization or biogenesis|cellular process	8	371	141	6672	0.5292	0.822888	1.02036	circRNA_4183|Chr3:59075644_59085278_+;circRNA_2865|Chr18:6047215_6051719_-;circRNA_4346|Chr3:122130941_122141403_+;circRNA_0485|Chr1:204960841_204961691_+;circRNA_1185|Chr10:88046855_88047023_+;circRNA_5150|Chr5:76925720_76926914_+;circRNA_2284|Chr15:37190896_37218085_+;circRNA_5414|Chr5:157690578_157712883_+
GO:0007015	actin filament organization	biological_process	cellular component organization or biogenesis|cellular process	3	371	102	6672	0.928853	0.968667	0.528936	circRNA_1878|Chr13:100347405_100353039_-;circRNA_4346|Chr3:122130941_122141403_+;circRNA_0716|Chr1:259479327_259489683_-
GO:0007017	microtubule-based process	biological_process	cellular process	1	371	12	6672	0.496977	0.810254	1.49865	circRNA_1188|Chr10:89036545_89074755_+
GO:0007018	microtubule-based movement	biological_process	cellular process	4	371	75	6672	0.606572	0.847465	0.959137	circRNA_1867|Chr13:97022518_97023051_-;circRNA_1093|Chr10:72203091_72212546_+;circRNA_2726|Chr17:54209230_54209739_+;circRNA_6415|Chr8:64635064_64648503_+
GO:0007020	microtubule nucleation	biological_process	cellular component organization or biogenesis|cellular process	2	371	11	6672	0.121747	0.807299	3.26979	circRNA_1188|Chr10:89036545_89074755_+;circRNA_1270|Chr10:110157631_110164041_-
GO:0007026	negative regulation of microtubule depolymerization	biological_process	biological regulation|cellular component organization or biogenesis|cellular process|negative regulation of biological process|regulation of biological process	2	371	32	6672	0.538235	0.825583	1.12399	circRNA_6007|Chr7:52310713_52318397_-;circRNA_1591|Chr12:25226326_25234184_+
GO:0007028	cytoplasm organization	biological_process	cellular component organization or biogenesis|cellular process	1	371	5	6672	0.248846	0.807299	3.59677	circRNA_2726|Chr17:54209230_54209739_+
GO:0007029	endoplasmic reticulum organization	biological_process	cellular component organization or biogenesis|cellular process	1	371	19	6672	0.663288	0.852917	0.946517	circRNA_4853|Chr4:147948449_147949383_-
GO:0007030	Golgi organization	biological_process	cellular component organization or biogenesis|cellular process	5	371	94	6672	0.605689	0.846809	0.956587	circRNA_2819|Chr17:87758882_87760775_-;circRNA_5962|Chr7:29284390_29288495_+;circRNA_1983|Chr14:17407714_17408515_-;circRNA_1270|Chr10:110157631_110164041_-;circRNA_2528|Chr16:47896917_47910476_+
GO:0007031	peroxisome organization	biological_process	cellular component organization or biogenesis|cellular process	1	371	7	6672	0.330125	0.807299	2.56912	circRNA_3773|Chr2:225348168_225352508_-
GO:0007043	cell-cell junction assembly	biological_process	cellular component organization or biogenesis|cellular process	1	371	7	6672	0.330125	0.807299	2.56912	circRNA_4139|Chr3:45365578_45372679_+
GO:0007044	cell-substrate junction assembly	biological_process	cellular component organization or biogenesis|cellular process	2	371	12	6672	0.140942	0.807299	2.9973	circRNA_6937|Chr9:78945266_78947892_-;circRNA_6935|Chr9:78911759_78911926_+
GO:0007050	cell cycle arrest	biological_process	biological regulation|cellular process|negative regulation of biological process|regulation of biological process	6	371	42	6672	0.0272888	0.495978	2.56912	circRNA_4183|Chr3:59075644_59085278_+;circRNA_3225|Chr19:42917629_42920390_-;circRNA_5526|Chr6:11219826_11221789_-;circRNA_2034|Chr14:43420836_43461320_+;circRNA_0857|Chr10:13944932_13945211_+;circRNA_3223|Chr19:42856166_42920390_-
GO:0007052	mitotic spindle organization	biological_process	cellular component organization or biogenesis|cellular process	1	371	17	6672	0.622353	0.847573	1.05787	circRNA_1188|Chr10:89036545_89074755_+
GO:0007059	chromosome segregation	biological_process	cellular process	2	371	32	6672	0.538235	0.825583	1.12399	circRNA_4837|Chr4:140870957_140872418_+;circRNA_4448|Chr3:156690910_156699465_+
GO:0007062	sister chromatid cohesion	biological_process	cellular component organization or biogenesis|cellular process	1	371	8	6672	0.367413	0.807299	2.24798	circRNA_3621|Chr2:184309074_184309661_-
GO:0007064	mitotic sister chromatid cohesion	biological_process	cellular component organization or biogenesis|cellular process	1	371	13	6672	0.524998	0.816973	1.38337	circRNA_3458|Chr2:57539193_57544062_-
GO:0007093	mitotic cell cycle checkpoint	biological_process	biological regulation|cellular process|negative regulation of biological process|regulation of biological process	3	371	8	6672	0.0077439	0.293409	6.74394	circRNA_4183|Chr3:59075644_59085278_+;circRNA_6443|Chr8:69105017_69107012_-;circRNA_3634|Chr2:187243578_187246451_-
GO:0007098	centrosome cycle	biological_process	cellular component organization or biogenesis|cellular process	1	371	32	6672	0.840411	0.919804	0.561995	circRNA_6001|Chr7:51425330_51432888_-
GO:0007131	reciprocal meiotic recombination	biological_process	cellular component organization or biogenesis|cellular process|metabolic process|reproduction|reproductive process	1	371	11	6672	0.467307	0.807299	1.63489	circRNA_6742|Chr9:16036525_16039832_+
GO:0007140	male meiotic nuclear division	biological_process	cellular component organization or biogenesis|cellular process|multicellular organismal process|multi-organism process|reproduction|reproductive process	1	371	12	6672	0.496977	0.810254	1.49865	circRNA_6742|Chr9:16036525_16039832_+
GO:0007141	male meiosis I	biological_process	cellular component organization or biogenesis|cellular process|multicellular organismal process|multi-organism process|reproduction|reproductive process	1	371	5	6672	0.248846	0.807299	3.59677	circRNA_6742|Chr9:16036525_16039832_+
GO:0007155	cell adhesion	biological_process	biological adhesion	8	371	151	6672	0.608245	0.847573	0.952786	circRNA_4051|Chr3:6464953_6472752_+;circRNA_6937|Chr9:78945266_78947892_-;circRNA_3283|Chr19:61714402_61714542_+;circRNA_6935|Chr9:78911759_78911926_+;circRNA_2459|Chr16:7226824_7229432_-;circRNA_6551|Chr8:87100666_87102375_-;circRNA_6103|Chr7:76114791_76119201_+;circRNA_1443|Chr11:79555990_79611741_-
GO:0007156	homophilic cell adhesion via plasma membrane adhesion molecules	biological_process	biological adhesion	1	371	35	6672	0.865698	0.93499	0.513824	circRNA_1288|Chr11:10020678_10022991_+
GO:0007159	leukocyte cell-cell adhesion	biological_process	biological adhesion	1	371	6	6672	0.290646	0.807299	2.9973	circRNA_3283|Chr19:61714402_61714542_+
GO:0007160	cell-matrix adhesion	biological_process	biological adhesion	9	371	57	6672	0.00385866	0.272375	2.83955	circRNA_6828|Chr9:52047552_52048745_+;circRNA_6937|Chr9:78945266_78947892_-;circRNA_4346|Chr3:122130941_122141403_+;circRNA_6830|Chr9:52048089_52048881_+;circRNA_6827|Chr9:52047552_52047844_+;circRNA_1818|Chr13:77863217_77865781_-;circRNA_3283|Chr19:61714402_61714542_+;circRNA_6825|Chr9:52043678_52045132_+;circRNA_6935|Chr9:78911759_78911926_+
GO:0007161	calcium-independent cell-matrix adhesion	biological_process	biological adhesion	3	371	7	6672	0.00504645	0.272375	7.70735	circRNA_6937|Chr9:78945266_78947892_-;circRNA_3283|Chr19:61714402_61714542_+;circRNA_6935|Chr9:78911759_78911926_+
GO:0007165	signal transduction	biological_process	biological regulation|cellular process|regulation of biological process|response to stimulus|signaling	11	371	341	6672	0.985642	0.993391	0.580123	circRNA_3087|Chr18:79813606_79815529_+;circRNA_2943|Chr18:31445709_31446694_-;circRNA_0763|Chr1:274700623_274701534_+;circRNA_0238|Chr1:128542589_128576607_-;circRNA_0761|Chr1:274688579_274718538_+;circRNA_7033|Chr9:113534327_113535129_+;circRNA_2819|Chr17:87758882_87760775_-;circRNA_0185|Chr1:93851663_93853240_-;circRNA_6001|Chr7:51425330_51432888_-;circRNA_6987|Chr9:96746440_96751314_+;circRNA_…
GO:0007166	cell surface receptor signaling pathway	biological_process	biological regulation|cellular process|regulation of biological process|response to stimulus|signaling	3	371	48	6672	0.504058	0.816973	1.12399	circRNA_3844|Chr2:256682926_256683075_+;circRNA_3842|Chr2:256669855_256683075_+;circRNA_1619|Chr12:31216380_31225308_-
GO:0007169	transmembrane receptor protein tyrosine kinase signaling pathway	biological_process	biological regulation|cellular process|regulation of biological process|response to stimulus|signaling	1	371	53	6672	0.952376	0.977151	0.339317	circRNA_2562|Chr16:63915078_63933482_+
GO:0007173	epidermal growth factor receptor signaling pathway	biological_process	biological regulation|cellular process|regulation of biological process|response to stimulus|signaling	1	371	41	6672	0.90491	0.957673	0.43863	circRNA_2439|Chr16:2354385_2354582_-
GO:0007179	transforming growth factor beta receptor signaling pathway	biological_process	biological regulation|cellular process|regulation of biological process|response to stimulus|signaling	8	371	71	6672	0.0422676	0.581817	2.02635	circRNA_6828|Chr9:52047552_52048745_+;circRNA_6830|Chr9:52048089_52048881_+;circRNA_4697|Chr4:66567829_66568912_-;circRNA_6827|Chr9:52047552_52047844_+;circRNA_3283|Chr19:61714402_61714542_+;circRNA_6825|Chr9:52043678_52045132_+;circRNA_3152|Chr19:32214551_32215127_+;circRNA_3057|Chr18:72593000_72595275_+
GO:0007182	common-partner SMAD protein phosphorylation	biological_process	biological regulation|cellular process|metabolic process|regulation of biological process|response to stimulus|signaling	1	371	10	6672	0.435893	0.807299	1.79838	circRNA_3057|Chr18:72593000_72595275_+
GO:0007183	SMAD protein complex assembly	biological_process	biological regulation|cellular component organization or biogenesis|cellular process|regulation of biological process|response to stimulus|signaling	2	371	24	6672	0.388875	0.807299	1.49865	circRNA_3152|Chr19:32214551_32215127_+;circRNA_3057|Chr18:72593000_72595275_+
GO:0007186	G-protein coupled receptor signaling pathway	biological_process	biological regulation|cellular process|regulation of biological process|response to stimulus|signaling	6	371	88	6672	0.364533	0.807299	1.22617	circRNA_3844|Chr2:256682926_256683075_+;circRNA_3842|Chr2:256669855_256683075_+;circRNA_5227|Chr5:117024123_117030956_-;circRNA_0591|Chr1:233578229_233581182_+;circRNA_0771|Chr1:278580846_278594581_+;circRNA_1619|Chr12:31216380_31225308_-
GO:0007188	adenylate cyclase-modulating G-protein coupled receptor signaling pathway	biological_process	biological regulation|cellular process|regulation of biological process|response to stimulus|signaling	1	371	12	6672	0.496977	0.810254	1.49865	circRNA_0591|Chr1:233578229_233581182_+
GO:0007189	adenylate cyclase-activating G-protein coupled receptor signaling pathway	biological_process	biological regulation|cellular process|regulation of biological process|response to stimulus|signaling	2	371	32	6672	0.538235	0.825583	1.12399	circRNA_0591|Chr1:233578229_233581182_+;circRNA_1619|Chr12:31216380_31225308_-
GO:0007200	phospholipase C-activating G-protein coupled receptor signaling pathway	biological_process	biological regulation|cellular process|regulation of biological process|response to stimulus|signaling	1	371	17	6672	0.622353	0.847573	1.05787	circRNA_0591|Chr1:233578229_233581182_+
GO:0007202	activation of phospholipase C activity	biological_process	biological regulation	1	371	8	6672	0.367413	0.807299	2.24798	circRNA_0591|Chr1:233578229_233581182_+
GO:0007204	positive regulation of cytosolic calcium ion concentration	biological_process	biological regulation|cellular process	2	371	46	6672	0.734208	0.878053	0.781906	circRNA_4863|Chr4:151118221_151123637_-;circRNA_0857|Chr10:13944932_13945211_+
GO:0007215	glutamate receptor signaling pathway	biological_process	biological regulation|cellular process|regulation of biological process|response to stimulus|signaling	1	371	7	6672	0.330125	0.807299	2.56912	circRNA_0591|Chr1:233578229_233581182_+
GO:0007219	Notch signaling pathway	biological_process	biological regulation|cellular process|regulation of biological process|response to stimulus|signaling	4	371	32	6672	0.0993042	0.787414	2.24798	circRNA_3621|Chr2:184309074_184309661_-;circRNA_6275|Chr8:12160079_12161683_+;circRNA_0728|Chr1:263249208_263253633_-;circRNA_2847|Chr18:2018381_2018553_-
GO:0007224	smoothened signaling pathway	biological_process	biological regulation|cellular process|regulation of biological process|response to stimulus|signaling	2	371	44	6672	0.711307	0.871665	0.817447	circRNA_4697|Chr4:66567829_66568912_-;circRNA_1882|Chr13:101498614_101503027_-
GO:0007229	integrin-mediated signaling pathway	biological_process	biological regulation|cellular process|regulation of biological process|response to stimulus|signaling	5	371	68	6672	0.326928	0.807299	1.32234	circRNA_6828|Chr9:52047552_52048745_+;circRNA_6830|Chr9:52048089_52048881_+;circRNA_6827|Chr9:52047552_52047844_+;circRNA_3283|Chr19:61714402_61714542_+;circRNA_6825|Chr9:52043678_52045132_+
GO:0007254	JNK cascade	biological_process	biological regulation|cellular process|metabolic process|regulation of biological process|response to stimulus|signaling	1	371	24	6672	0.74729	0.883396	0.749326	circRNA_0038|Chr1:15545013_15551204_+
GO:0007257	activation of JUN kinase activity	biological_process	biological regulation|cellular process|metabolic process|positive regulation of biological process|regulation of biological process|response to stimulus|signaling	1	371	17	6672	0.622353	0.847573	1.05787	circRNA_4183|Chr3:59075644_59085278_+
GO:0007259	JAK-STAT cascade	biological_process	biological regulation|cellular process|regulation of biological process|response to stimulus|signaling	1	371	6	6672	0.290646	0.807299	2.9973	circRNA_0857|Chr10:13944932_13945211_+
GO:0007264	small GTPase mediated signal transduction	biological_process	biological regulation|cellular process|regulation of biological process|response to stimulus|signaling	5	371	81	6672	0.471925	0.810254	1.11011	circRNA_0617|Chr1:243014234_243018525_+;circRNA_3733|Chr2:208198684_208203924_-;circRNA_1315|Chr11:31974630_31979720_+;circRNA_5662|Chr6:60609626_60618957_+;circRNA_5232|Chr5:117620103_117623151_-
GO:0007265	Ras protein signal transduction	biological_process	biological regulation|cellular process|regulation of biological process|response to stimulus|signaling	2	371	45	6672	0.722957	0.877387	0.799281	circRNA_0763|Chr1:274700623_274701534_+;circRNA_0761|Chr1:274688579_274718538_+
GO:0007266	Rho protein signal transduction	biological_process	biological regulation|cellular process|regulation of biological process|response to stimulus|signaling	4	371	27	6672	0.0599932	0.6545	2.66427	circRNA_1267|Chr10:109754906_109755050_+;circRNA_1266|Chr10:109754888_109755050_+;circRNA_6046|Chr7:64125692_64131186_-;circRNA_1265|Chr10:109754865_109755050_+
GO:0007267	cell-cell signaling	biological_process	cellular process|signaling	2	371	9	6672	0.0856728	0.732146	3.99641	circRNA_2459|Chr16:7226824_7229432_-;circRNA_0447|Chr1:200606971_200615170_-
GO:0007268	chemical synaptic transmission	biological_process	cellular process|signaling	1	371	46	6672	0.928703	0.968667	0.390953	circRNA_4863|Chr4:151118221_151123637_-
GO:0007270	neuron-neuron synaptic transmission	biological_process	cellular process|signaling	1	371	7	6672	0.330125	0.807299	2.56912	circRNA_0647|Chr1:251455609_251485480_+
GO:0007275	multicellular organism development	biological_process	developmental process|multicellular organismal process	5	371	162	6672	0.951927	0.977151	0.555056	circRNA_0233|Chr1:128239552_128243030_-;circRNA_3087|Chr18:79813606_79815529_+;circRNA_0447|Chr1:200606971_200615170_-;circRNA_0185|Chr1:93851663_93853240_-;circRNA_2284|Chr15:37190896_37218085_+
GO:0007276	gamete generation	biological_process	multicellular organismal process|multi-organism process|reproduction|reproductive process	1	371	13	6672	0.524998	0.816973	1.38337	circRNA_3152|Chr19:32214551_32215127_+
GO:0007281	germ cell development	biological_process	cellular process|developmental process|multicellular organismal process|multi-organism process|reproduction|reproductive process	1	371	18	6672	0.643406	0.848633	0.999102	circRNA_5526|Chr6:11219826_11221789_-
GO:0007283	spermatogenesis	biological_process	multicellular organismal process|multi-organism process|reproduction|reproductive process	7	371	164	6672	0.814994	0.913126	0.767602	circRNA_2378|Chr15:70098761_70139170_-;circRNA_2375|Chr15:70077466_70105489_-;circRNA_6934|Chr9:78341845_78350281_-;circRNA_5526|Chr6:11219826_11221789_-;circRNA_2377|Chr15:70098761_70105489_-;circRNA_6742|Chr9:16036525_16039832_+;circRNA_5413|Chr5:156506448_156517254_+
GO:0007286	spermatid development	biological_process	cellular process|developmental process|multicellular organismal process|multi-organism process|reproduction|reproductive process	3	371	53	6672	0.571873	0.832613	1.01795	circRNA_4795|Chr4:117422680_117436312_+;circRNA_2690|Chr17:29730437_29737981_-;circRNA_0921|Chr10:38712831_38720071_+
GO:0007338	single fertilization	biological_process	multi-organism process|reproduction|reproductive process	1	371	39	6672	0.893308	0.950626	0.461124	circRNA_3663|Chr2:188308301_188309036_+
GO:0007339	binding of sperm to zona pellucida	biological_process	cellular process|multi-organism process|reproduction|reproductive process	2	371	13	6672	0.160722	0.807299	2.76674	circRNA_3885|Chr20:4896892_4921063_-;circRNA_3675|Chr2:189383399_189395748_-
GO:0007346	regulation of mitotic cell cycle	biological_process	biological regulation|cellular process|regulation of biological process	1	371	84	6672	0.992067	0.996518	0.214093	circRNA_7179|ChrX:109996163_110063748_+
GO:0007352	zygotic specification of dorsal/ventral axis	biological_process	developmental process|multicellular organismal process	1	371	7	6672	0.330125	0.807299	2.56912	circRNA_3057|Chr18:72593000_72595275_+
GO:0007368	determination of left/right symmetry	biological_process	developmental process|multicellular organismal process	2	371	25	6672	0.408823	0.807299	1.43871	circRNA_1882|Chr13:101498614_101503027_-;circRNA_3934|Chr20:18905679_18920851_+
GO:0007369	gastrulation	biological_process	developmental process|multicellular organismal process	1	371	27	6672	0.787287	0.903596	0.666068	circRNA_3057|Chr18:72593000_72595275_+
GO:0007379	segment specification	biological_process	developmental process|multicellular organismal process	1	371	5	6672	0.248846	0.807299	3.59677	circRNA_5208|Chr5:106171074_106171781_-
GO:0007389	pattern specification process	biological_process	developmental process|multicellular organismal process	2	371	32	6672	0.538235	0.825583	1.12399	circRNA_1882|Chr13:101498614_101503027_-;circRNA_3057|Chr18:72593000_72595275_+
GO:0007399	nervous system development	biological_process	developmental process|multicellular organismal process	5	371	100	6672	0.660479	0.852917	0.899191	circRNA_0206|Chr1:104792188_104821976_+;circRNA_2562|Chr16:63915078_63933482_+;circRNA_3581|Chr2:150755405_150756431_+;circRNA_3686|Chr2:195768840_195795666_-;circRNA_0594|Chr1:235750193_235761819_-
GO:0007409	axonogenesis	biological_process	cellular component organization or biogenesis|cellular process|developmental process|multicellular organismal process	7	371	75	6672	0.122002	0.807299	1.67849	circRNA_1547|Chr12:13717791_13718009_-;circRNA_3572|Chr2:144876416_144917472_+;circRNA_6915|Chr9:70787138_70787910_-;circRNA_0290|Chr1:154405931_154425509_+;circRNA_1818|Chr13:77863217_77865781_-;circRNA_0447|Chr1:200606971_200615170_-;circRNA_5232|Chr5:117620103_117623151_-
GO:0007411	axon guidance	biological_process	cellular component organization or biogenesis|cellular process|developmental process|locomotion|multicellular organismal process|response to stimulus	6	371	77	6672	0.25602	0.807299	1.40134	circRNA_1878|Chr13:100347405_100353039_-;circRNA_6915|Chr9:70787138_70787910_-;circRNA_2177|Chr14:107594175_107594869_-;circRNA_1288|Chr11:10020678_10022991_+;circRNA_2726|Chr17:54209230_54209739_+;circRNA_2034|Chr14:43420836_43461320_+
GO:0007416	synapse assembly	biological_process	cellular component organization or biogenesis|cellular process|developmental process|multicellular organismal process	4	371	20	6672	0.0224256	0.495978	3.59677	circRNA_6219|Chr7:130522030_130524289_+;circRNA_2411|Chr15:106417736_106434369_+;circRNA_2562|Chr16:63915078_63933482_+;circRNA_0647|Chr1:251455609_251485480_+
GO:0007417	central nervous system development	biological_process	developmental process|multicellular organismal process	5	371	41	6672	0.075085	0.706419	2.19315	circRNA_5945|Chr7:23546534_23546690_+;circRNA_3585|Chr2:154520979_154532393_-;circRNA_0447|Chr1:200606971_200615170_-;circRNA_1288|Chr11:10020678_10022991_+;circRNA_0647|Chr1:251455609_251485480_+
GO:0007420	brain development	biological_process	developmental process|multicellular organismal process	12	371	158	6672	0.168259	0.807299	1.36586	circRNA_3572|Chr2:144876416_144917472_+;circRNA_3225|Chr19:42917629_42920390_-;circRNA_5986|Chr7:41167312_41167751_+;circRNA_2439|Chr16:2354385_2354582_-;circRNA_3458|Chr2:57539193_57544062_-;circRNA_1231|Chr10:95327724_95328546_-;circRNA_1315|Chr11:31974630_31979720_+;circRNA_5987|Chr7:41167312_41178782_+;circRNA_6103|Chr7:76114791_76119201_+;circRNA_2562|Chr16:63915078_63933482_+;circRNA_2726|C…
GO:0007422	peripheral nervous system development	biological_process	developmental process|multicellular organismal process	1	371	12	6672	0.496977	0.810254	1.49865	circRNA_2562|Chr16:63915078_63933482_+
GO:0007492	endoderm development	biological_process	developmental process	2	371	39	6672	0.646824	0.849862	0.922248	circRNA_1231|Chr10:95327724_95328546_-;circRNA_3057|Chr18:72593000_72595275_+
GO:0007507	heart development	biological_process	developmental process|multicellular organismal process	26	371	227	6672	0.000324513	0.123365	2.05982	circRNA_6828|Chr9:52047552_52048745_+;circRNA_1738|Chr13:52667988_52673721_+;circRNA_4863|Chr4:151118221_151123637_-;circRNA_0233|Chr1:128239552_128243030_-;circRNA_6830|Chr9:52048089_52048881_+;circRNA_4330|Chr3:117726599_117728604_-;circRNA_1064|Chr10:67497682_67503048_+;circRNA_6827|Chr9:52047552_52047844_+;circRNA_0591|Chr1:233578229_233581182_+;circRNA_6825|Chr9:52043678_52045132_+;circRNA_3…
GO:0007517	muscle organ development	biological_process	developmental process|multicellular organismal process	1	371	21	6672	0.699797	0.864628	0.856373	circRNA_2562|Chr16:63915078_63933482_+
GO:0007519	skeletal muscle tissue development	biological_process	developmental process|multicellular organismal process	2	371	59	6672	0.848203	0.925104	0.609621	circRNA_3581|Chr2:150755405_150756431_+;circRNA_4829|Chr4:131439626_131453028_-
GO:0007528	neuromuscular junction development	biological_process	cellular component organization or biogenesis|cellular process	2	371	34	6672	0.571473	0.832613	1.05787	circRNA_0447|Chr1:200606971_200615170_-;circRNA_0011|Chr1:6601452_6613874_-
GO:0007565	female pregnancy	biological_process	multicellular organismal process|multi-organism process|reproduction|reproductive process	1	371	37	6672	0.880294	0.94429	0.486049	circRNA_4658|Chr4:62270233_62272586_+
GO:0007568	aging	biological_process	developmental process	9	371	121	6672	0.230055	0.807299	1.33764	circRNA_6828|Chr9:52047552_52048745_+;circRNA_6830|Chr9:52048089_52048881_+;circRNA_5945|Chr7:23546534_23546690_+;circRNA_6827|Chr9:52047552_52047844_+;circRNA_6825|Chr9:52043678_52045132_+;circRNA_5986|Chr7:41167312_41167751_+;circRNA_5987|Chr7:41167312_41178782_+;circRNA_0647|Chr1:251455609_251485480_+;circRNA_6658|Chr8:118616528_118620855_+
GO:0007569	cell aging	biological_process	cellular process|developmental process	1	371	20	6672	0.682064	0.858756	0.899191	circRNA_0758|Chr1:274628955_274647456_+
GO:0007584	response to nutrient	biological_process	response to stimulus	2	371	54	6672	0.810901	0.91232	0.666068	circRNA_1147|Chr10:82752455_82752793_+;circRNA_0647|Chr1:251455609_251485480_+
GO:0007596	blood coagulation	biological_process	biological regulation|multicellular organismal process|response to stimulus	1	371	36	6672	0.873205	0.939635	0.499551	circRNA_3332|Chr2:24067948_24083767_+
GO:0007601	visual perception	biological_process	multicellular organismal process	1	371	25	6672	0.761393	0.889503	0.719353	circRNA_1147|Chr10:82752455_82752793_+
GO:0007605	sensory perception of sound	biological_process	multicellular organismal process	5	371	58	6672	0.219129	0.807299	1.55033	circRNA_1147|Chr10:82752455_82752793_+;circRNA_4795|Chr4:117422680_117436312_+;circRNA_0206|Chr1:104792188_104821976_+;circRNA_3458|Chr2:57539193_57544062_-;circRNA_3727|Chr2:206964921_206976810_-
GO:0007608	sensory perception of smell	biological_process	multicellular organismal process	4	371	21	6672	0.0265205	0.495978	3.42549	circRNA_3745|Chr2:210808354_210822401_-;circRNA_3744|Chr2:210806416_210806638_+;circRNA_2177|Chr14:107594175_107594869_-;circRNA_0206|Chr1:104792188_104821976_+
GO:0007611	learning or memory	biological_process	multicellular organismal process	4	371	40	6672	0.180401	0.807299	1.79838	circRNA_6219|Chr7:130522030_130524289_+;circRNA_0290|Chr1:154405931_154425509_+;circRNA_6894|Chr9:67242046_67257543_+;circRNA_0647|Chr1:251455609_251485480_+
GO:0007612	learning	biological_process	multicellular organismal process	2	371	25	6672	0.408823	0.807299	1.43871	circRNA_6219|Chr7:130522030_130524289_+;circRNA_2439|Chr16:2354385_2354582_-
GO:0007613	memory	biological_process	multicellular organismal process	3	371	28	6672	0.201934	0.807299	1.92684	circRNA_6219|Chr7:130522030_130524289_+;circRNA_2562|Chr16:63915078_63933482_+;circRNA_0647|Chr1:251455609_251485480_+
GO:0007623	circadian rhythm	biological_process	rhythmic process	4	371	52	6672	0.327556	0.807299	1.38337	circRNA_1547|Chr12:13717791_13718009_-;circRNA_1346|Chr11:34865447_34879143_+;circRNA_1349|Chr11:34879058_34932316_+;circRNA_4448|Chr3:156690910_156699465_+
GO:0007626	locomotory behavior	biological_process	NA	6	371	48	6672	0.0484462	0.612665	2.24798	circRNA_6219|Chr7:130522030_130524289_+;circRNA_0206|Chr1:104792188_104821976_+;circRNA_2562|Chr16:63915078_63933482_+;circRNA_0647|Chr1:251455609_251485480_+;circRNA_5682|Chr6:74325751_74326157_+;circRNA_0594|Chr1:235750193_235761819_-
GO:0007628	adult walking behavior	biological_process	multicellular organismal process	3	371	35	6672	0.308184	0.807299	1.54147	circRNA_4863|Chr4:151118221_151123637_-;circRNA_4697|Chr4:66567829_66568912_-;circRNA_2614|Chr17:5511386_5548199_+
GO:0007631	feeding behavior	biological_process	NA	1	371	9	6672	0.402631	0.807299	1.9982	circRNA_1840|Chr13:85397122_85399509_-
GO:0008017	microtubule binding	molecular_function	binding	7	371	168	6672	0.833681	0.919326	0.749326	circRNA_1867|Chr13:97022518_97023051_-;circRNA_6007|Chr7:52310713_52318397_-;circRNA_4285|Chr3:104816866_104818862_+;circRNA_1093|Chr10:72203091_72212546_+;circRNA_2726|Chr17:54209230_54209739_+;circRNA_6415|Chr8:64635064_64648503_+;circRNA_1591|Chr12:25226326_25234184_+
GO:0008021	synaptic vesicle	cellular_component	cell|cell part|organelle|synapse|synapse part	1	371	54	6672	0.955046	0.979399	0.333034	circRNA_0290|Chr1:154405931_154425509_+
GO:0008022	protein C-terminus binding	molecular_function	binding	7	371	147	6672	0.717498	0.872263	0.856373	circRNA_6219|Chr7:130522030_130524289_+;circRNA_6937|Chr9:78945266_78947892_-;circRNA_6935|Chr9:78911759_78911926_+;circRNA_3458|Chr2:57539193_57544062_-;circRNA_1286|Chr11:3142305_3142832_+;circRNA_5526|Chr6:11219826_11221789_-;circRNA_3556|Chr2:128642780_128668115_-
GO:0008023	transcription elongation factor complex	cellular_component	cell|cell part|macromolecular complex|membrane-enclosed lumen|organelle|organelle part	3	371	18	6672	0.0748262	0.706419	2.9973	circRNA_5208|Chr5:106171074_106171781_-;circRNA_1949|Chr14:7291691_7293326_-;circRNA_0921|Chr10:38712831_38720071_+
GO:0008045	motor neuron axon guidance	biological_process	cellular component organization or biogenesis|cellular process|developmental process|locomotion|multicellular organismal process|response to stimulus	1	371	14	6672	0.551462	0.825583	1.28456	circRNA_4829|Chr4:131439626_131453028_-
GO:0008047	enzyme activator activity	molecular_function	enzyme regulator activity	1	371	6	6672	0.290646	0.807299	2.9973	circRNA_5962|Chr7:29284390_29288495_+
GO:0008064	regulation of actin polymerization or depolymerization	biological_process	biological regulation|cellular component organization or biogenesis|cellular process|regulation of biological process	1	371	6	6672	0.290646	0.807299	2.9973	circRNA_1029|Chr10:62751173_62767418_-
GO:0008083	growth factor activity	molecular_function	binding|receptor regulator activity	1	371	21	6672	0.699797	0.864628	0.856373	circRNA_2562|Chr16:63915078_63933482_+
GO:0008089	anterograde axonal transport	biological_process	cellular process|establishment of localization|localization	1	371	31	6672	0.830968	0.917779	0.580123	circRNA_3332|Chr2:24067948_24083767_+
GO:0008092	cytoskeletal protein binding	molecular_function	binding	5	371	50	6672	0.143028	0.807299	1.79838	circRNA_6953|Chr9:82558343_82558587_+;circRNA_1346|Chr11:34865447_34879143_+;circRNA_1349|Chr11:34879058_34932316_+;circRNA_2411|Chr15:106417736_106434369_+;circRNA_6952|Chr9:82557123_82558587_+
GO:0008094	DNA-dependent ATPase activity	molecular_function	catalytic activity	3	371	25	6672	0.159475	0.807299	2.15806	circRNA_5752|Chr6:102510293_102512499_+;circRNA_1231|Chr10:95327724_95328546_-;circRNA_5526|Chr6:11219826_11221789_-
GO:0008104	protein localization	biological_process	localization	2	371	51	6672	0.78478	0.903246	0.705248	circRNA_2726|Chr17:54209230_54209739_+;circRNA_0959|Chr10:48165219_48200848_-
GO:0008134	transcription factor binding	molecular_function	binding	10	371	253	6672	0.904754	0.957673	0.710823	circRNA_0233|Chr1:128239552_128243030_-;circRNA_3203|Chr19:38057557_38062193_+;circRNA_1231|Chr10:95327724_95328546_-;circRNA_0716|Chr1:259479327_259489683_-;circRNA_6753|Chr9:18653895_18660843_+;circRNA_2034|Chr14:43420836_43461320_+;circRNA_3216|Chr19:39543248_39545672_+;circRNA_4829|Chr4:131439626_131453028_-;circRNA_2849|Chr18:2445774_2446986_+;circRNA_3057|Chr18:72593000_72595275_+
GO:0008138	protein tyrosine/serine/threonine phosphatase activity	molecular_function	catalytic activity	3	371	21	6672	0.108099	0.801999	2.56912	circRNA_5059|Chr5:48695038_48698976_+;circRNA_0647|Chr1:251455609_251485480_+;circRNA_1029|Chr10:62751173_62767418_-
GO:0008144	drug binding	molecular_function	binding	1	371	38	6672	0.886988	0.948	0.473259	circRNA_5687|Chr6:76020953_76031336_+
GO:0008150	biological_process	biological_process	NA	64	371	946	6672	0.0501963	0.612665	1.21666	circRNA_6256|Chr7:143274109_143324536_-;circRNA_1658|Chr12:43576497_43576734_-;circRNA_4481|Chr3:172518176_172524861_+;circRNA_1993|Chr14:22619364_22655924_+;circRNA_1076|Chr10:71001715_71009562_+;circRNA_4593|Chr4:31220330_31319352_+;circRNA_4051|Chr3:6464953_6472752_+;circRNA_5775|Chr6:108797786_108802113_+;circRNA_1255|Chr10:106264856_106265494_+;circRNA_0080|Chr1:31950617_31954909_-;circRNA_0…
GO:0008154	actin polymerization or depolymerization	biological_process	cellular component organization or biogenesis|cellular process	1	371	7	6672	0.330125	0.807299	2.56912	circRNA_1878|Chr13:100347405_100353039_-
GO:0008157	protein phosphatase 1 binding	molecular_function	binding	2	371	16	6672	0.222389	0.807299	2.24798	circRNA_0763|Chr1:274700623_274701534_+;circRNA_0761|Chr1:274688579_274718538_+
GO:0008180	COP9 signalosome	cellular_component	cell|cell part|macromolecular complex|organelle|organelle part	3	371	19	6672	0.085342	0.732146	2.83955	circRNA_0052|Chr1:20961258_20962540_-;circRNA_3885|Chr20:4896892_4921063_-;circRNA_5232|Chr5:117620103_117623151_-
GO:0008201	heparin binding	molecular_function	binding	6	371	50	6672	0.0572532	0.634737	2.15806	circRNA_4051|Chr3:6464953_6472752_+;circRNA_6937|Chr9:78945266_78947892_-;circRNA_4330|Chr3:117726599_117728604_-;circRNA_6935|Chr9:78911759_78911926_+;circRNA_0206|Chr1:104792188_104821976_+;circRNA_1363|Chr11:46324401_46341113_-
GO:0008202	steroid metabolic process	biological_process	metabolic process	1	371	5	6672	0.248846	0.807299	3.59677	circRNA_6157|Chr7:116072198_116158807_-
GO:0008203	cholesterol metabolic process	biological_process	metabolic process	2	371	25	6672	0.408823	0.807299	1.43871	circRNA_6157|Chr7:116072198_116158807_-;circRNA_6658|Chr8:118616528_118620855_+
GO:0008209	androgen metabolic process	biological_process	biological regulation|cellular process|metabolic process	1	371	7	6672	0.330125	0.807299	2.56912	circRNA_1993|Chr14:22619364_22655924_+
GO:0008217	regulation of blood pressure	biological_process	biological regulation|multicellular organismal process	3	371	33	6672	0.277245	0.807299	1.63489	circRNA_4863|Chr4:151118221_151123637_-;circRNA_0649|Chr1:252537818_252539458_-;circRNA_0650|Chr1:252537894_252539495_+
GO:0008219	cell death	biological_process	cellular process	1	371	17	6672	0.622353	0.847573	1.05787	circRNA_2275|Chr15:36823412_36828644_+
GO:0008233	peptidase activity	molecular_function	catalytic activity	5	371	51	6672	0.151836	0.807299	1.76312	circRNA_3791|Chr2:227687641_227700240_+;circRNA_3395|Chr2:34476081_34503654_+;circRNA_3850|Chr2:257937494_257945564_+;circRNA_3391|Chr2:34396320_34404958_+;circRNA_3390|Chr2:34373875_34404958_+
GO:0008237	metallopeptidase activity	molecular_function	catalytic activity	1	371	19	6672	0.663288	0.852917	0.946517	circRNA_2599|Chr17:599906_610676_+
GO:0008270	zinc ion binding	molecular_function	binding	34	371	456	6672	0.0466014	0.612459	1.3409	circRNA_6107|Chr7:76837537_76845975_-;circRNA_4897|Chr4:157436084_157436365_-;circRNA_6219|Chr7:130522030_130524289_+;circRNA_5945|Chr7:23546534_23546690_+;circRNA_1636|Chr12:38305355_38317018_+;circRNA_0544|Chr1:220039308_220042767_-;circRNA_3225|Chr19:42917629_42920390_-;circRNA_6407|Chr8:64171150_64184113_-;circRNA_3092|Chr18:81418662_81428974_-;circRNA_3847|Chr2:257626382_257629063_+;circRNA_…
GO:0008277	regulation of G-protein coupled receptor protein signaling pathway	biological_process	biological regulation|cellular process|regulation of biological process|response to stimulus|signaling	1	371	20	6672	0.682064	0.858756	0.899191	circRNA_3283|Chr19:61714402_61714542_+
GO:0008283	cell proliferation	biological_process	NA	3	371	114	6672	0.957069	0.980024	0.473259	circRNA_0290|Chr1:154405931_154425509_+;circRNA_6103|Chr7:76114791_76119201_+;circRNA_2562|Chr16:63915078_63933482_+
GO:0008284	positive regulation of cell proliferation	biological_process	biological regulation|cellular process|positive regulation of biological process|regulation of biological process	16	371	221	6672	0.167513	0.807299	1.302	circRNA_2146|Chr14:88724076_88725530_-;circRNA_6937|Chr9:78945266_78947892_-;circRNA_4697|Chr4:66567829_66568912_-;circRNA_6772|Chr9:26636334_26669699_-;circRNA_3283|Chr19:61714402_61714542_+;circRNA_5752|Chr6:102510293_102512499_+;circRNA_6935|Chr9:78911759_78911926_+;circRNA_0447|Chr1:200606971_200615170_-;circRNA_2562|Chr16:63915078_63933482_+;circRNA_6753|Chr9:18653895_18660843_+;circRNA_5163…
GO:0008285	negative regulation of cell proliferation	biological_process	biological regulation|cellular process|negative regulation of biological process|regulation of biological process	9	371	191	6672	0.743654	0.883396	0.847405	circRNA_5266|Chr5:127620259_127635191_-;circRNA_7179|ChrX:109996163_110063748_+;circRNA_3283|Chr19:61714402_61714542_+;circRNA_0447|Chr1:200606971_200615170_-;circRNA_1288|Chr11:10020678_10022991_+;circRNA_0647|Chr1:251455609_251485480_+;circRNA_3152|Chr19:32214551_32215127_+;circRNA_5265|Chr5:127620259_127629649_-;circRNA_3057|Chr18:72593000_72595275_+
GO:0008286	insulin receptor signaling pathway	biological_process	biological regulation|cellular process|regulation of biological process|response to stimulus|signaling	1	371	64	6672	0.974763	0.987284	0.280997	circRNA_0716|Chr1:259479327_259489683_-
GO:0008289	lipid binding	molecular_function	binding	1	371	36	6672	0.873205	0.939635	0.499551	circRNA_1794|Chr13:73255237_73265813_+
GO:0008290	F-actin capping protein complex	cellular_component	cell|cell part|macromolecular complex|organelle|organelle part	1	371	5	6672	0.248846	0.807299	3.59677	circRNA_5414|Chr5:157690578_157712883_+
GO:0008305	integrin complex	cellular_component	cell|cell part|macromolecular complex|membrane|membrane part	1	371	10	6672	0.435893	0.807299	1.79838	circRNA_3283|Chr19:61714402_61714542_+
GO:0008328	ionotropic glutamate receptor complex	cellular_component	cell|cell part|macromolecular complex|membrane|membrane part	1	371	6	6672	0.290646	0.807299	2.9973	circRNA_6219|Chr7:130522030_130524289_+
GO:0008331	high voltage-gated calcium channel activity	molecular_function	transporter activity	1	371	9	6672	0.402631	0.807299	1.9982	circRNA_4863|Chr4:151118221_151123637_-
GO:0008333	endosome to lysosome transport	biological_process	establishment of localization|localization	1	371	22	6672	0.716542	0.871665	0.817447	circRNA_3686|Chr2:195768840_195795666_-
GO:0008340	determination of adult lifespan	biological_process	developmental process|multicellular organismal process	2	371	18	6672	0.264453	0.807299	1.9982	circRNA_2493|Chr16:19805426_19805902_+;circRNA_5526|Chr6:11219826_11221789_-
GO:0008344	adult locomotory behavior	biological_process	multicellular organismal process	1	371	53	6672	0.952376	0.977151	0.339317	circRNA_4697|Chr4:66567829_66568912_-
GO:0008347	glial cell migration	biological_process	cellular process|developmental process|localization|locomotion|multicellular organismal process	2	371	7	6672	0.0537688	0.612665	5.13824	circRNA_6937|Chr9:78945266_78947892_-;circRNA_6935|Chr9:78911759_78911926_+
GO:0008360	regulation of cell shape	biological_process	biological regulation|cellular component organization or biogenesis|cellular process|developmental process|regulation of biological process	7	371	97	6672	0.293798	0.807299	1.2978	circRNA_1267|Chr10:109754906_109755050_+;circRNA_6937|Chr9:78945266_78947892_-;circRNA_1266|Chr10:109754888_109755050_+;circRNA_1265|Chr10:109754865_109755050_+;circRNA_6935|Chr9:78911759_78911926_+;circRNA_7047|Chr9:119309035_119311107_-;circRNA_1270|Chr10:110157631_110164041_-
GO:0008378	galactosyltransferase activity	molecular_function	catalytic activity	2	371	5	6672	0.0275678	0.495978	7.19353	circRNA_2887|Chr18:15480332_15494701_+;circRNA_2177|Chr14:107594175_107594869_-
GO:0008380	RNA splicing	biological_process	cellular process|metabolic process	2	371	51	6672	0.78478	0.903246	0.705248	circRNA_2410|Chr15:105687771_105688392_+;circRNA_3581|Chr2:150755405_150756431_+
GO:0008395	steroid hydroxylase activity	molecular_function	catalytic activity	1	371	6	6672	0.290646	0.807299	2.9973	circRNA_5223|Chr5:115146569_115199307_-
GO:0008429	phosphatidylethanolamine binding	molecular_function	binding	1	371	15	6672	0.576456	0.832613	1.19892	circRNA_5902|Chr6:144189453_144275272_+
GO:0008432	JUN kinase binding	molecular_function	binding	1	371	13	6672	0.524998	0.816973	1.38337	circRNA_2726|Chr17:54209230_54209739_+
GO:0008509	anion transmembrane transporter activity	molecular_function	transporter activity	1	371	10	6672	0.435893	0.807299	1.79838	circRNA_1261|Chr10:108486117_108494849_+
GO:0008542	visual learning	biological_process	multicellular organismal process|response to stimulus	2	371	58	6672	0.841323	0.919804	0.620132	circRNA_4863|Chr4:151118221_151123637_-;circRNA_3283|Chr19:61714402_61714542_+
GO:0008543	fibroblast growth factor receptor signaling pathway	biological_process	biological regulation|cellular process|regulation of biological process|response to stimulus|signaling	1	371	12	6672	0.496977	0.810254	1.49865	circRNA_0447|Chr1:200606971_200615170_-
GO:0008544	epidermis development	biological_process	developmental process	1	371	26	6672	0.774711	0.894571	0.691686	circRNA_6103|Chr7:76114791_76119201_+
GO:0008565	protein transporter activity	molecular_function	transporter activity	2	371	40	6672	0.660573	0.852917	0.899191	circRNA_3733|Chr2:208198684_208203924_-;circRNA_1983|Chr14:17407714_17408515_-
GO:0008574	ATP-dependent microtubule motor activity, plus-end-directed	molecular_function	catalytic activity	1	371	11	6672	0.467307	0.807299	1.63489	circRNA_2726|Chr17:54209230_54209739_+
GO:0008584	male gonad development	biological_process	developmental process|multicellular organismal process|reproduction|reproductive process	3	371	60	6672	0.656562	0.852917	0.899191	circRNA_5526|Chr6:11219826_11221789_-;circRNA_3944|Chr20:22822066_22856689_-;circRNA_2849|Chr18:2445774_2446986_+
GO:0008589	regulation of smoothened signaling pathway	biological_process	biological regulation|cellular process|regulation of biological process|response to stimulus|signaling	1	371	20	6672	0.682064	0.858756	0.899191	circRNA_0447|Chr1:200606971_200615170_-
GO:0008630	intrinsic apoptotic signaling pathway in response to DNA damage	biological_process	biological regulation|cellular process|regulation of biological process|response to stimulus|signaling	1	371	15	6672	0.576456	0.832613	1.19892	circRNA_5526|Chr6:11219826_11221789_-
GO:0008631	intrinsic apoptotic signaling pathway in response to oxidative stress	biological_process	biological regulation|cellular process|regulation of biological process|response to stimulus|signaling	1	371	10	6672	0.435893	0.807299	1.79838	circRNA_0038|Chr1:15545013_15551204_+
GO:0008654	phospholipid biosynthetic process	biological_process	cellular process|metabolic process	1	371	12	6672	0.496977	0.810254	1.49865	circRNA_3514|Chr2:113744312_113745181_+
GO:0009062	fatty acid catabolic process	biological_process	cellular process|metabolic process	1	371	6	6672	0.290646	0.807299	2.9973	circRNA_5617|Chr6:41822551_41830656_-
GO:0009225	nucleotide-sugar metabolic process	biological_process	cellular process|metabolic process	1	371	5	6672	0.248846	0.807299	3.59677	circRNA_2472|Chr16:8396763_8400882_+
GO:0009314	response to radiation	biological_process	response to stimulus	4	371	19	6672	0.0187417	0.468771	3.78607	circRNA_6828|Chr9:52047552_52048745_+;circRNA_6830|Chr9:52048089_52048881_+;circRNA_6827|Chr9:52047552_52047844_+;circRNA_6825|Chr9:52043678_52045132_+
GO:0009395	phospholipid catabolic process	biological_process	cellular process|metabolic process	1	371	12	6672	0.496977	0.810254	1.49865	circRNA_3514|Chr2:113744312_113745181_+
GO:0009409	response to cold	biological_process	response to stimulus	3	371	14	6672	0.0392779	0.559784	3.85368	circRNA_3087|Chr18:79813606_79815529_+;circRNA_5986|Chr7:41167312_41167751_+;circRNA_5987|Chr7:41167312_41178782_+
GO:0009611	response to wounding	biological_process	response to stimulus	3	371	31	6672	0.246645	0.807299	1.74037	circRNA_6937|Chr9:78945266_78947892_-;circRNA_6935|Chr9:78911759_78911926_+;circRNA_1231|Chr10:95327724_95328546_-
GO:0009612	response to mechanical stimulus	biological_process	response to stimulus	7	371	77	6672	0.134919	0.807299	1.63489	circRNA_6828|Chr9:52047552_52048745_+;circRNA_1547|Chr12:13717791_13718009_-;circRNA_6830|Chr9:52048089_52048881_+;circRNA_5945|Chr7:23546534_23546690_+;circRNA_1147|Chr10:82752455_82752793_+;circRNA_6827|Chr9:52047552_52047844_+;circRNA_6825|Chr9:52043678_52045132_+
GO:0009615	response to virus	biological_process	multi-organism process|response to stimulus	3	371	15	6672	0.0471303	0.612459	3.59677	circRNA_3572|Chr2:144876416_144917472_+;circRNA_0649|Chr1:252537818_252539458_-;circRNA_0650|Chr1:252537894_252539495_+
GO:0009636	response to toxic substance	biological_process	response to stimulus	1	371	32	6672	0.840411	0.919804	0.561995	circRNA_2849|Chr18:2445774_2446986_+
GO:0009653	anatomical structure morphogenesis	biological_process	developmental process	3	371	22	6672	0.120267	0.807299	2.45234	circRNA_4330|Chr3:117726599_117728604_-;circRNA_1272|Chr10:110495072_110500097_+;circRNA_4829|Chr4:131439626_131453028_-
GO:0009725	response to hormone	biological_process	response to stimulus	2	371	33	6672	0.555074	0.827968	1.08993	circRNA_5945|Chr7:23546534_23546690_+;circRNA_6574|Chr8:94283953_94292111_-
GO:0009743	response to carbohydrate	biological_process	response to stimulus	2	371	7	6672	0.0537688	0.612665	5.13824	circRNA_3733|Chr2:208198684_208203924_-;circRNA_0728|Chr1:263249208_263253633_-
GO:0009749	response to glucose	biological_process	response to stimulus	2	371	50	6672	0.775394	0.894571	0.719353	circRNA_0647|Chr1:251455609_251485480_+;circRNA_3057|Chr18:72593000_72595275_+
GO:0009791	post-embryonic development	biological_process	developmental process|multicellular organismal process	5	371	100	6672	0.660479	0.852917	0.899191	circRNA_0591|Chr1:233578229_233581182_+;circRNA_0447|Chr1:200606971_200615170_-;circRNA_3815|Chr2:238742934_238746181_-;circRNA_3663|Chr2:188308301_188309036_+;circRNA_3057|Chr18:72593000_72595275_+
GO:0009880	embryonic pattern specification	biological_process	developmental process|multicellular organismal process	4	371	27	6672	0.0599932	0.6545	2.66427	circRNA_1882|Chr13:101498614_101503027_-;circRNA_0447|Chr1:200606971_200615170_-;circRNA_3152|Chr19:32214551_32215127_+;circRNA_3057|Chr18:72593000_72595275_+
GO:0009887	animal organ morphogenesis	biological_process	developmental process|multicellular organismal process	4	371	62	6672	0.455183	0.807299	1.16025	circRNA_0447|Chr1:200606971_200615170_-;circRNA_2849|Chr18:2445774_2446986_+;circRNA_4413|Chr3:148837814_148842440_+;circRNA_4416|Chr3:148837814_148862118_+
GO:0009888	tissue development	biological_process	developmental process	1	371	5	6672	0.248846	0.807299	3.59677	circRNA_2849|Chr18:2445774_2446986_+
GO:0009897	external side of plasma membrane	cellular_component	cell|cell part|membrane|membrane part	4	371	77	6672	0.627497	0.848633	0.934225	circRNA_3283|Chr19:61714402_61714542_+;circRNA_0038|Chr1:15545013_15551204_+;circRNA_3876|Chr20:4095939_4118506_+;circRNA_2562|Chr16:63915078_63933482_+
GO:0009898	cytoplasmic side of plasma membrane	cellular_component	cell|cell part|membrane|membrane part	6	371	52	6672	0.0669604	0.671779	2.07506	circRNA_0613|Chr1:242716557_242737019_-;circRNA_4139|Chr3:45365578_45372679_+;circRNA_5986|Chr7:41167312_41167751_+;circRNA_5987|Chr7:41167312_41178782_+;circRNA_0647|Chr1:251455609_251485480_+;circRNA_0609|Chr1:242607845_242631822_-
GO:0009925	basal plasma membrane	cellular_component	cell|cell part|membrane|membrane part	1	371	22	6672	0.716542	0.871665	0.817447	circRNA_4366|Chr3:124680315_124680563_-
GO:0009952	anterior/posterior pattern specification	biological_process	developmental process|multicellular organismal process	4	371	62	6672	0.455183	0.807299	1.16025	circRNA_4697|Chr4:66567829_66568912_-;circRNA_5208|Chr5:106171074_106171781_-;circRNA_1231|Chr10:95327724_95328546_-;circRNA_3057|Chr18:72593000_72595275_+
GO:0009953	dorsal/ventral pattern formation	biological_process	developmental process|multicellular organismal process	1	371	14	6672	0.551462	0.825583	1.28456	circRNA_1882|Chr13:101498614_101503027_-
GO:0009954	proximal/distal pattern formation	biological_process	developmental process|multicellular organismal process	1	371	9	6672	0.402631	0.807299	1.9982	circRNA_0225|Chr1:127025462_127025957_+
GO:0009966	regulation of signal transduction	biological_process	biological regulation|cellular process|regulation of biological process|response to stimulus|signaling	1	371	19	6672	0.663288	0.852917	0.946517	circRNA_3367|Chr2:30384653_30433774_-
GO:0009967	positive regulation of signal transduction	biological_process	biological regulation|cellular process|positive regulation of biological process|regulation of biological process|response to stimulus|signaling	1	371	35	6672	0.865698	0.93499	0.513824	circRNA_0716|Chr1:259479327_259489683_-
GO:0009968	negative regulation of signal transduction	biological_process	biological regulation|cellular process|negative regulation of biological process|regulation of biological process|response to stimulus|signaling	1	371	45	6672	0.924475	0.968385	0.399641	circRNA_0447|Chr1:200606971_200615170_-
GO:0009986	cell surface	cellular_component	cell|cell part	10	371	184	6672	0.577052	0.832887	0.977382	circRNA_0290|Chr1:154405931_154425509_+;circRNA_1818|Chr13:77863217_77865781_-;circRNA_3283|Chr19:61714402_61714542_+;circRNA_7247|ChrX:157322637_157323315_+;circRNA_0447|Chr1:200606971_200615170_-;circRNA_3373|Chr2:30564530_30566431_-;circRNA_3876|Chr20:4095939_4118506_+;circRNA_1288|Chr11:10020678_10022991_+;circRNA_0857|Chr10:13944932_13945211_+;circRNA_3670|Chr2:189226433_189230967_-
GO:0010001	glial cell differentiation	biological_process	cellular process|developmental process|multicellular organismal process	1	371	6	6672	0.290646	0.807299	2.9973	circRNA_2562|Chr16:63915078_63933482_+
GO:0010008	endosome membrane	cellular_component	cell|cell part|membrane|organelle|organelle part	2	371	51	6672	0.78478	0.903246	0.705248	circRNA_6919|Chr9:71920586_71955010_+;circRNA_6917|Chr9:71915420_71927987_+
GO:0010033	response to organic substance	biological_process	response to stimulus	3	371	54	6672	0.584731	0.842385	0.999102	circRNA_5945|Chr7:23546534_23546690_+;circRNA_3876|Chr20:4095939_4118506_+;circRNA_0647|Chr1:251455609_251485480_+
GO:0010035	response to inorganic substance	biological_process	response to stimulus	1	371	5	6672	0.248846	0.807299	3.59677	circRNA_0647|Chr1:251455609_251485480_+
GO:0010038	response to metal ion	biological_process	response to stimulus	2	371	12	6672	0.140942	0.807299	2.9973	circRNA_3745|Chr2:210808354_210822401_-;circRNA_3744|Chr2:210806416_210806638_+
GO:0010039	response to iron ion	biological_process	response to stimulus	2	371	7	6672	0.0537688	0.612665	5.13824	circRNA_6937|Chr9:78945266_78947892_-;circRNA_6935|Chr9:78911759_78911926_+
GO:0010043	response to zinc ion	biological_process	response to stimulus	2	371	12	6672	0.140942	0.807299	2.9973	circRNA_3237|Chr19:43265984_43294685_+;circRNA_0647|Chr1:251455609_251485480_+
GO:0010165	response to X-ray	biological_process	response to stimulus	1	371	11	6672	0.467307	0.807299	1.63489	circRNA_5526|Chr6:11219826_11221789_-
GO:0010193	response to ozone	biological_process	response to stimulus	2	371	5	6672	0.0275678	0.495978	7.19353	circRNA_6937|Chr9:78945266_78947892_-;circRNA_6935|Chr9:78911759_78911926_+
GO:0010212	response to ionizing radiation	biological_process	response to stimulus	1	371	50	6672	0.943382	0.974749	0.359677	circRNA_4508|Chr4:3972586_3976284_+
GO:0010226	response to lithium ion	biological_process	response to stimulus	2	371	15	6672	0.201552	0.807299	2.39784	circRNA_3745|Chr2:210808354_210822401_-;circRNA_3744|Chr2:210806416_210806638_+
GO:0010243	response to organonitrogen compound	biological_process	response to stimulus	2	371	37	6672	0.618011	0.847573	0.972099	circRNA_4561|Chr4:22084945_22091386_+;circRNA_3152|Chr19:32214551_32215127_+
GO:0010288	response to lead ion	biological_process	response to stimulus	2	371	17	6672	0.243383	0.807299	2.11574	circRNA_3745|Chr2:210808354_210822401_-;circRNA_3744|Chr2:210806416_210806638_+
GO:0010332	response to gamma radiation	biological_process	response to stimulus	2	371	12	6672	0.140942	0.807299	2.9973	circRNA_4448|Chr3:156690910_156699465_+;circRNA_3670|Chr2:189226433_189230967_-
GO:0010453	regulation of cell fate commitment	biological_process	biological regulation|cellular process|developmental process|regulation of biological process	1	371	5	6672	0.248846	0.807299	3.59677	circRNA_0447|Chr1:200606971_200615170_-
GO:0010467	gene expression	biological_process	metabolic process	1	371	6	6672	0.290646	0.807299	2.9973	circRNA_4285|Chr3:104816866_104818862_+
GO:0010468	regulation of gene expression	biological_process	biological regulation|metabolic process|regulation of biological process	10	371	161	6672	0.405937	0.807299	1.11701	circRNA_0544|Chr1:220039308_220042767_-;circRNA_1447|Chr11:81375744_81376852_-;circRNA_0547|Chr1:220042074_220049075_-;circRNA_6103|Chr7:76114791_76119201_+;circRNA_5163|Chr5:90817794_90827570_+;circRNA_6243|Chr7:140533891_140536242_-;circRNA_3663|Chr2:188308301_188309036_+;circRNA_2849|Chr18:2445774_2446986_+;circRNA_7065|ChrX:4819220_4832241_-;circRNA_0543|Chr1:220039308_220040146_-
GO:0010469	regulation of signaling receptor activity	biological_process	biological regulation|cellular process|regulation of biological process|response to stimulus|signaling	1	371	26	6672	0.774711	0.894571	0.691686	circRNA_2562|Chr16:63915078_63933482_+
GO:0010494	cytoplasmic stress granule	cellular_component	cell|cell part|macromolecular complex|organelle	4	371	41	6672	0.191786	0.807299	1.75452	circRNA_0544|Chr1:220039308_220042767_-;circRNA_0547|Chr1:220042074_220049075_-;circRNA_3581|Chr2:150755405_150756431_+;circRNA_0543|Chr1:220039308_220040146_-
GO:0010501	RNA secondary structure unwinding	biological_process	cellular process|metabolic process	4	371	24	6672	0.0413375	0.576756	2.9973	circRNA_4054|Chr3:7456433_7475230_+;circRNA_1447|Chr11:81375744_81376852_-;circRNA_3237|Chr19:43265984_43294685_+;circRNA_1625|Chr12:37462807_37465389_-
GO:0010507	negative regulation of autophagy	biological_process	biological regulation|cellular process|metabolic process|negative regulation of biological process|regulation of biological process	1	371	26	6672	0.774711	0.894571	0.691686	circRNA_5413|Chr5:156506448_156517254_+
GO:0010518	positive regulation of phospholipase activity	biological_process	biological regulation	1	371	7	6672	0.330125	0.807299	2.56912	circRNA_0447|Chr1:200606971_200615170_-
GO:0010529	negative regulation of transposition	biological_process	biological regulation|cellular process|negative regulation of biological process|regulation of biological process	1	371	5	6672	0.248846	0.807299	3.59677	circRNA_6742|Chr9:16036525_16039832_+
GO:0010591	regulation of lamellipodium assembly	biological_process	biological regulation|cellular component organization or biogenesis|cellular process|regulation of biological process	2	371	17	6672	0.243383	0.807299	2.11574	circRNA_5414|Chr5:157690578_157712883_+;circRNA_1029|Chr10:62751173_62767418_-
GO:0010595	positive regulation of endothelial cell migration	biological_process	biological regulation|cellular process|localization|locomotion|multicellular organismal process|positive regulation of biological process|regulation of biological process	1	371	23	6672	0.732356	0.878053	0.781906	circRNA_4829|Chr4:131439626_131453028_-
GO:0010613	positive regulation of cardiac muscle hypertrophy	biological_process	biological regulation|multicellular organismal process|positive regulation of biological process|regulation of biological process|response to stimulus	2	371	37	6672	0.618011	0.847573	0.972099	circRNA_0233|Chr1:128239552_128243030_-;circRNA_2222|Chr15:3233141_3293913_-
GO:0010628	positive regulation of gene expression	biological_process	biological regulation|metabolic process|positive regulation of biological process|regulation of biological process	15	371	205	6672	0.167126	0.807299	1.31589	circRNA_6107|Chr7:76837537_76845975_-;circRNA_4776|Chr4:115221467_115224878_-;circRNA_6937|Chr9:78945266_78947892_-;circRNA_0649|Chr1:252537818_252539458_-;circRNA_6935|Chr9:78911759_78911926_+;circRNA_0447|Chr1:200606971_200615170_-;circRNA_2562|Chr16:63915078_63933482_+;circRNA_3675|Chr2:189383399_189395748_-;circRNA_6753|Chr9:18653895_18660843_+;circRNA_0650|Chr1:252537894_252539495_+;circRNA_…
GO:0010629	negative regulation of gene expression	biological_process	biological regulation|metabolic process|negative regulation of biological process|regulation of biological process	3	371	107	6672	0.942225	0.974749	0.504219	circRNA_0290|Chr1:154405931_154425509_+;circRNA_3216|Chr19:39543248_39545672_+;circRNA_3057|Chr18:72593000_72595275_+
GO:0010640	regulation of platelet-derived growth factor receptor signaling pathway	biological_process	biological regulation|cellular process|regulation of biological process|response to stimulus|signaling	1	371	5	6672	0.248846	0.807299	3.59677	circRNA_3727|Chr2:206964921_206976810_-
GO:0010656	negative regulation of muscle cell apoptotic process	biological_process	biological regulation|cellular process|negative regulation of biological process|regulation of biological process	1	371	10	6672	0.435893	0.807299	1.79838	circRNA_3152|Chr19:32214551_32215127_+
GO:0010666	positive regulation of cardiac muscle cell apoptotic process	biological_process	biological regulation|cellular process|positive regulation of biological process|regulation of biological process	3	371	28	6672	0.201934	0.807299	1.92684	circRNA_0038|Chr1:15545013_15551204_+;circRNA_2849|Chr18:2445774_2446986_+;circRNA_0647|Chr1:251455609_251485480_+
GO:0010667	negative regulation of cardiac muscle cell apoptotic process	biological_process	biological regulation|cellular process|negative regulation of biological process|regulation of biological process	1	371	15	6672	0.576456	0.832613	1.19892	circRNA_2562|Chr16:63915078_63933482_+
GO:0010718	positive regulation of epithelial to mesenchymal transition	biological_process	biological regulation|cellular process|developmental process|multicellular organismal process|positive regulation of biological process|regulation of biological process	2	371	40	6672	0.660573	0.852917	0.899191	circRNA_1147|Chr10:82752455_82752793_+;circRNA_3057|Chr18:72593000_72595275_+
GO:0010719	negative regulation of epithelial to mesenchymal transition	biological_process	biological regulation|cellular process|developmental process|multicellular organismal process|negative regulation of biological process|regulation of biological process	3	371	11	6672	0.0201439	0.480409	4.90468	circRNA_3020|Chr18:63784568_63786264_+;circRNA_0647|Chr1:251455609_251485480_+;circRNA_3023|Chr18:63843748_63844188_+
GO:0010811	positive regulation of cell-substrate adhesion	biological_process	biological adhesion|biological regulation|positive regulation of biological process|regulation of biological process	2	371	17	6672	0.243383	0.807299	2.11574	circRNA_3283|Chr19:61714402_61714542_+;circRNA_1363|Chr11:46324401_46341113_-
GO:0010812	negative regulation of cell-substrate adhesion	biological_process	biological adhesion|biological regulation|cellular process|negative regulation of biological process|regulation of biological process	1	371	18	6672	0.643406	0.848633	0.999102	circRNA_1147|Chr10:82752455_82752793_+
GO:0010824	regulation of centrosome duplication	biological_process	biological regulation|cellular component organization or biogenesis|cellular process|regulation of biological process	1	371	20	6672	0.682064	0.858756	0.899191	circRNA_6772|Chr9:26636334_26669699_-
GO:0010842	retina layer formation	biological_process	developmental process|multicellular organismal process	1	371	16	6672	0.60006	0.842385	1.12399	circRNA_4697|Chr4:66567829_66568912_-
GO:0010880	regulation of release of sequestered calcium ion into cytosol by sarcoplasmic reticulum	biological_process	biological regulation|cellular process|establishment of localization|localization|negative regulation of biological process|regulation of biological process	1	371	24	6672	0.74729	0.883396	0.749326	circRNA_3738|Chr2:210723584_210806489_-
GO:0010923	negative regulation of phosphatase activity	biological_process	biological regulation|cellular process|metabolic process|negative regulation of biological process|regulation of biological process	2	371	27	6672	0.447726	0.807299	1.33214	circRNA_6001|Chr7:51425330_51432888_-;circRNA_2411|Chr15:106417736_106434369_+
GO:0010941	regulation of cell death	biological_process	biological regulation|cellular process|regulation of biological process	1	371	7	6672	0.330125	0.807299	2.56912	circRNA_0038|Chr1:15545013_15551204_+
GO:0010951	negative regulation of endopeptidase activity	biological_process	biological regulation|cellular process|metabolic process|negative regulation of biological process|regulation of biological process	1	371	26	6672	0.774711	0.894571	0.691686	circRNA_5945|Chr7:23546534_23546690_+
GO:0010952	positive regulation of peptidase activity	biological_process	biological regulation|cellular process|metabolic process|positive regulation of biological process|regulation of biological process	2	371	17	6672	0.243383	0.807299	2.11574	circRNA_6937|Chr9:78945266_78947892_-;circRNA_6935|Chr9:78911759_78911926_+
GO:0010971	positive regulation of G2/M transition of mitotic cell cycle	biological_process	biological regulation|cellular process|positive regulation of biological process|regulation of biological process	1	371	18	6672	0.643406	0.848633	0.999102	circRNA_5752|Chr6:102510293_102512499_+
GO:0010975	regulation of neuron projection development	biological_process	biological regulation|cellular component organization or biogenesis|cellular process|developmental process|multicellular organismal process|regulation of biological process	1	371	19	6672	0.663288	0.852917	0.946517	circRNA_0647|Chr1:251455609_251485480_+
GO:0010976	positive regulation of neuron projection development	biological_process	biological regulation|cellular component organization or biogenesis|cellular process|developmental process|multicellular organismal process|positive regulation of biological process|regulation of biological process	3	371	81	6672	0.836515	0.919804	0.666068	circRNA_3283|Chr19:61714402_61714542_+;circRNA_3733|Chr2:208198684_208203924_-;circRNA_2562|Chr16:63915078_63933482_+
GO:0010977	negative regulation of neuron projection development	biological_process	biological regulation|cellular component organization or biogenesis|cellular process|developmental process|multicellular organismal process|negative regulation of biological process|regulation of biological process	1	371	61	6672	0.969987	0.984873	0.294817	circRNA_3727|Chr2:206964921_206976810_-
GO:0012505	endomembrane system	cellular_component	cell|cell part	5	371	75	6672	0.405457	0.807299	1.19892	circRNA_4098|Chr3:21782079_21792112_+;circRNA_4853|Chr4:147948449_147949383_-;circRNA_6811|Chr9:46123188_46125984_-;circRNA_4094|Chr3:21721366_21736929_+;circRNA_1923|Chr14:2924636_2924865_+
GO:0012506	vesicle membrane	cellular_component	membrane|organelle|organelle part	2	371	26	6672	0.428449	0.807299	1.38337	circRNA_6919|Chr9:71920586_71955010_+;circRNA_6917|Chr9:71915420_71927987_+
GO:0012507	ER to Golgi transport vesicle membrane	cellular_component	cell|cell part|membrane|organelle|organelle part	2	371	9	6672	0.0856728	0.732146	3.99641	circRNA_1983|Chr14:17407714_17408515_-;circRNA_6658|Chr8:118616528_118620855_+
GO:0014068	positive regulation of phosphatidylinositol 3-kinase signaling	biological_process	biological regulation|cellular process|positive regulation of biological process|regulation of biological process|response to stimulus|signaling	1	371	28	6672	0.799163	0.907577	0.64228	circRNA_2562|Chr16:63915078_63933482_+
GO:0014069	postsynaptic density	cellular_component	cell|cell part|organelle|synapse|synapse part	11	371	185	6672	0.454238	0.807299	1.06931	circRNA_1547|Chr12:13717791_13718009_-;circRNA_4863|Chr4:151118221_151123637_-;circRNA_6219|Chr7:130522030_130524289_+;circRNA_4403|Chr3:145092634_145129362_+;circRNA_3572|Chr2:144876416_144917472_+;circRNA_4402|Chr3:145092634_145098350_+;circRNA_4139|Chr3:45365578_45372679_+;circRNA_4658|Chr4:62270233_62272586_+;circRNA_0290|Chr1:154405931_154425509_+;circRNA_2847|Chr18:2018381_2018553_-;circRNA…
GO:0014070	response to organic cyclic compound	biological_process	response to stimulus	5	371	95	6672	0.615163	0.847573	0.946517	circRNA_5945|Chr7:23546534_23546690_+;circRNA_3773|Chr2:225348168_225352508_-;circRNA_5526|Chr6:11219826_11221789_-;circRNA_3815|Chr2:238742934_238746181_-;circRNA_0647|Chr1:251455609_251485480_+
GO:0014704	intercalated disc	cellular_component	cell junction	6	371	62	6672	0.128743	0.807299	1.74037	circRNA_0613|Chr1:242716557_242737019_-;circRNA_6953|Chr9:82558343_82558587_+;circRNA_3283|Chr19:61714402_61714542_+;circRNA_5414|Chr5:157690578_157712883_+;circRNA_6952|Chr9:82557123_82558587_+;circRNA_0609|Chr1:242607845_242631822_-
GO:0014823	response to activity	biological_process	response to stimulus	5	371	68	6672	0.326928	0.807299	1.32234	circRNA_6937|Chr9:78945266_78947892_-;circRNA_3283|Chr19:61714402_61714542_+;circRNA_6935|Chr9:78911759_78911926_+;circRNA_0716|Chr1:259479327_259489683_-;circRNA_0647|Chr1:251455609_251485480_+
GO:0014829	vascular smooth muscle contraction	biological_process	biological regulation|multicellular organismal process	2	371	8	6672	0.0691104	0.671779	4.49596	circRNA_0649|Chr1:252537818_252539458_-;circRNA_0650|Chr1:252537894_252539495_+
GO:0014883	transition between fast and slow fiber	biological_process	biological regulation|multicellular organismal process|regulation of biological process|response to stimulus	1	371	14	6672	0.551462	0.825583	1.28456	circRNA_0375|Chr1:177651557_177654228_+
GO:0014894	response to denervation involved in regulation of muscle adaptation	biological_process	biological regulation|regulation of biological process|response to stimulus	1	371	22	6672	0.716542	0.871665	0.817447	circRNA_0011|Chr1:6601452_6613874_-
GO:0014898	cardiac muscle hypertrophy in response to stress	biological_process	multicellular organismal process|response to stimulus	2	371	16	6672	0.222389	0.807299	2.24798	circRNA_3203|Chr19:38057557_38062193_+;circRNA_2849|Chr18:2445774_2446986_+
GO:0014902	myotube differentiation	biological_process	cellular process|developmental process	1	371	11	6672	0.467307	0.807299	1.63489	circRNA_3203|Chr19:38057557_38062193_+
GO:0014904	myotube cell development	biological_process	cellular process|developmental process	1	371	14	6672	0.551462	0.825583	1.28456	circRNA_3203|Chr19:38057557_38062193_+
GO:0015020	glucuronosyltransferase activity	molecular_function	catalytic activity	1	371	10	6672	0.435893	0.807299	1.79838	circRNA_1993|Chr14:22619364_22655924_+
GO:0015030	Cajal body	cellular_component	cell|cell part|membrane-enclosed lumen|organelle|organelle part	1	371	21	6672	0.699797	0.864628	0.856373	circRNA_4833|Chr4:133073964_133094100_-
GO:0015031	protein transport	biological_process	establishment of localization|localization	8	371	123	6672	0.376336	0.807299	1.16968	circRNA_6242|Chr7:140415833_140417547_-;circRNA_6441|Chr8:68539308_68542150_+;circRNA_1147|Chr10:82752455_82752793_+;circRNA_6241|Chr7:140415223_140417547_-;circRNA_2439|Chr16:2354385_2354582_-;circRNA_3733|Chr2:208198684_208203924_-;circRNA_1079|Chr10:71297308_71306105_+;circRNA_4954|Chr4:181910549_181913546_+
GO:0015183	L-aspartate transmembrane transporter activity	molecular_function	transporter activity	1	371	7	6672	0.330125	0.807299	2.56912	circRNA_4593|Chr4:31220330_31319352_+
GO:0015278	calcium-release channel activity	molecular_function	molecular transducer activity|receptor activity|transporter activity	1	371	22	6672	0.716542	0.871665	0.817447	circRNA_4948|Chr4:180711145_180722357_-
GO:0015293	symporter activity	molecular_function	transporter activity	2	371	10	6672	0.103274	0.787414	3.59677	circRNA_3170|Chr19:33010738_33073342_-;circRNA_3168|Chr19:33010738_33064405_-
GO:0015485	cholesterol binding	molecular_function	binding	2	371	19	6672	0.285525	0.807299	1.89303	circRNA_4722|Chr4:80080131_80090153_-;circRNA_6658|Chr8:118616528_118620855_+
GO:0015629	actin cytoskeleton	cellular_component	cell|cell part|organelle	12	371	163	6672	0.19522	0.807299	1.32396	circRNA_1255|Chr10:106264856_106265494_+;circRNA_1547|Chr12:13717791_13718009_-;circRNA_0649|Chr1:252537818_252539458_-;circRNA_4658|Chr4:62270233_62272586_+;circRNA_6391|Chr8:60917720_60920949_-;circRNA_4699|Chr4:67299951_67301045_-;circRNA_2819|Chr17:87758882_87760775_-;circRNA_0568|Chr1:225195375_225196571_+;circRNA_6001|Chr7:51425330_51432888_-;circRNA_6749|Chr9:17720405_17720735_-;circRNA_06…
GO:0015630	microtubule cytoskeleton	cellular_component	cell|cell part|organelle	3	371	100	6672	0.922751	0.968385	0.539515	circRNA_1255|Chr10:106264856_106265494_+;circRNA_4285|Chr3:104816866_104818862_+;circRNA_2726|Chr17:54209230_54209739_+
GO:0015631	tubulin binding	molecular_function	binding	3	371	48	6672	0.504058	0.816973	1.12399	circRNA_1346|Chr11:34865447_34879143_+;circRNA_2614|Chr17:5511386_5548199_+;circRNA_1349|Chr11:34879058_34932316_+
GO:0015701	bicarbonate transport	biological_process	establishment of localization|localization	1	371	6	6672	0.290646	0.807299	2.9973	circRNA_1261|Chr10:108486117_108494849_+
GO:0015810	aspartate transmembrane transport	biological_process	establishment of localization|localization	1	371	7	6672	0.330125	0.807299	2.56912	circRNA_4593|Chr4:31220330_31319352_+
GO:0015813	L-glutamate transmembrane transport	biological_process	establishment of localization|localization	1	371	10	6672	0.435893	0.807299	1.79838	circRNA_4593|Chr4:31220330_31319352_+
GO:0015909	long-chain fatty acid transport	biological_process	establishment of localization|localization	1	371	8	6672	0.367413	0.807299	2.24798	circRNA_4561|Chr4:22084945_22091386_+
GO:0015910	peroxisomal long-chain fatty acid import	biological_process	establishment of localization|localization	1	371	6	6672	0.290646	0.807299	2.9973	circRNA_3773|Chr2:225348168_225352508_-
GO:0016010	dystrophin-associated glycoprotein complex	cellular_component	cell|cell part|macromolecular complex|membrane|membrane part	3	371	28	6672	0.201934	0.807299	1.92684	circRNA_0613|Chr1:242716557_242737019_-;circRNA_0011|Chr1:6601452_6613874_-;circRNA_0609|Chr1:242607845_242631822_-
GO:0016020	membrane	cellular_component	NA	25	371	671	6672	0.991388	0.996518	0.670038	circRNA_1267|Chr10:109754906_109755050_+;circRNA_4863|Chr4:151118221_151123637_-;circRNA_1266|Chr10:109754888_109755050_+;circRNA_1064|Chr10:67497682_67503048_+;circRNA_6169|Chr7:119987740_119990307_-;circRNA_4658|Chr4:62270233_62272586_+;circRNA_6781|Chr9:30155195_30155808_+;circRNA_0591|Chr1:233578229_233581182_+;circRNA_6772|Chr9:26636334_26669699_-;circRNA_3283|Chr19:61714402_61714542_+;circR…
GO:0016021	integral component of membrane	cellular_component	membrane|membrane part	48	371	928	6672	0.73344	0.878053	0.930198	circRNA_1249|Chr10:103586432_103677527_-;circRNA_1993|Chr14:22619364_22655924_+;circRNA_1942|Chr14:5870915_5943886_+;circRNA_4593|Chr4:31220330_31319352_+;circRNA_3170|Chr19:33010738_33073342_-;circRNA_3844|Chr2:256682926_256683075_+;circRNA_4863|Chr4:151118221_151123637_-;circRNA_2887|Chr18:15480332_15494701_+;circRNA_4669|Chr4:64894605_64899587_-;circRNA_4346|Chr3:122130941_122141403_+;circRNA_…
GO:0016024	CDP-diacylglycerol biosynthetic process	biological_process	cellular process|metabolic process	1	371	6	6672	0.290646	0.807299	2.9973	circRNA_1955|Chr14:9421418_9440942_-
GO:0016042	lipid catabolic process	biological_process	metabolic process	2	371	31	6672	0.520964	0.816973	1.16025	circRNA_5564|Chr6:25409775_25417047_-;circRNA_3514|Chr2:113744312_113745181_+
GO:0016045	detection of bacterium	biological_process	multi-organism process|response to stimulus	3	371	8	6672	0.0077439	0.293409	6.74394	circRNA_3876|Chr20:4095939_4118506_+;circRNA_3367|Chr2:30384653_30433774_-;circRNA_2472|Chr16:8396763_8400882_+
GO:0016050	vesicle organization	biological_process	cellular component organization or biogenesis|cellular process	1	371	28	6672	0.799163	0.907577	0.64228	circRNA_0290|Chr1:154405931_154425509_+
GO:0016055	Wnt signaling pathway	biological_process	biological regulation|cellular process|regulation of biological process|response to stimulus|signaling	1	371	56	6672	0.959945	0.980685	0.32114	circRNA_1270|Chr10:110157631_110164041_-
GO:0016082	synaptic vesicle priming	biological_process	biological regulation|cellular component organization or biogenesis|cellular process|establishment of localization|localization|signaling	1	371	9	6672	0.402631	0.807299	1.9982	circRNA_0939|Chr10:45771832_45778634_-
GO:0016151	nickel cation binding	molecular_function	binding	2	371	6	6672	0.0398481	0.559784	5.99461	circRNA_3745|Chr2:210808354_210822401_-;circRNA_3744|Chr2:210806416_210806638_+
GO:0016188	synaptic vesicle maturation	biological_process	cellular component organization or biogenesis|cellular process|developmental process	1	371	10	6672	0.435893	0.807299	1.79838	circRNA_0290|Chr1:154405931_154425509_+
GO:0016192	vesicle-mediated transport	biological_process	establishment of localization|localization	4	371	99	6672	0.808995	0.91232	0.726619	circRNA_1064|Chr10:67497682_67503048_+;circRNA_0290|Chr1:154405931_154425509_+;circRNA_6781|Chr9:30155195_30155808_+;circRNA_6987|Chr9:96746440_96751314_+
GO:0016197	endosomal transport	biological_process	establishment of localization|localization	3	371	48	6672	0.504058	0.816973	1.12399	circRNA_0290|Chr1:154405931_154425509_+;circRNA_4795|Chr4:117422680_117436312_+;circRNA_3686|Chr2:195768840_195795666_-
GO:0016199	axon midline choice point recognition	biological_process	cellular component organization or biogenesis|cellular process|developmental process|locomotion|multicellular organismal process|response to stimulus	1	371	6	6672	0.290646	0.807299	2.9973	circRNA_1288|Chr11:10020678_10022991_+
GO:0016301	kinase activity	molecular_function	catalytic activity	1	371	70	6672	0.982159	0.991479	0.256912	circRNA_1270|Chr10:110157631_110164041_-
GO:0016308	1-phosphatidylinositol-4-phosphate 5-kinase activity	molecular_function	catalytic activity	2	371	10	6672	0.103274	0.787414	3.59677	circRNA_6919|Chr9:71920586_71955010_+;circRNA_6917|Chr9:71915420_71927987_+
GO:0016310	phosphorylation	biological_process	cellular process|metabolic process	3	371	61	6672	0.667625	0.857957	0.884451	circRNA_1840|Chr13:85397122_85399509_-;circRNA_3930|Chr20:18467660_18474832_-;circRNA_2222|Chr15:3233141_3293913_-
GO:0016311	dephosphorylation	biological_process	cellular process|metabolic process	1	371	24	6672	0.74729	0.883396	0.749326	circRNA_5617|Chr6:41822551_41830656_-
GO:0016322	neuron remodeling	biological_process	cellular process|developmental process|multicellular organismal process	1	371	12	6672	0.496977	0.810254	1.49865	circRNA_0591|Chr1:233578229_233581182_+
GO:0016323	basolateral plasma membrane	cellular_component	cell|cell part|membrane|membrane part	5	371	106	6672	0.710125	0.871665	0.848294	circRNA_4863|Chr4:151118221_151123637_-;circRNA_5986|Chr7:41167312_41167751_+;circRNA_4366|Chr3:124680315_124680563_-;circRNA_5987|Chr7:41167312_41178782_+;circRNA_0857|Chr10:13944932_13945211_+
GO:0016324	apical plasma membrane	cellular_component	cell|cell part|membrane|membrane part	13	371	159	6672	0.104107	0.790828	1.47038	circRNA_1942|Chr14:5870915_5943886_+;circRNA_6937|Chr9:78945266_78947892_-;circRNA_6772|Chr9:26636334_26669699_-;circRNA_5986|Chr7:41167312_41167751_+;circRNA_6935|Chr9:78911759_78911926_+;circRNA_4366|Chr3:124680315_124680563_-;circRNA_5564|Chr6:25409775_25417047_-;circRNA_3373|Chr2:30564530_30566431_-;circRNA_5987|Chr7:41167312_41178782_+;circRNA_2562|Chr16:63915078_63933482_+;circRNA_3514|Chr2…
GO:0016327	apicolateral plasma membrane	cellular_component	cell|cell part|membrane|membrane part	1	371	9	6672	0.402631	0.807299	1.9982	circRNA_3373|Chr2:30564530_30566431_-
GO:0016328	lateral plasma membrane	cellular_component	cell|cell part|membrane|membrane part	2	371	43	6672	0.699251	0.864628	0.836457	circRNA_3373|Chr2:30564530_30566431_-;circRNA_0857|Chr10:13944932_13945211_+
GO:0016331	morphogenesis of embryonic epithelium	biological_process	developmental process|multicellular organismal process	1	371	9	6672	0.402631	0.807299	1.9982	circRNA_0447|Chr1:200606971_200615170_-
GO:0016358	dendrite development	biological_process	cellular component organization or biogenesis|cellular process|developmental process|multicellular organismal process	1	371	23	6672	0.732356	0.878053	0.781906	circRNA_6894|Chr9:67242046_67257543_+
GO:0016363	nuclear matrix	cellular_component	cell|cell part|membrane-enclosed lumen|organelle|organelle part	2	371	75	6672	0.926944	0.968667	0.479569	circRNA_2985|Chr18:51805551_51807909_+;circRNA_0716|Chr1:259479327_259489683_-
GO:0016446	somatic hypermutation of immunoglobulin genes	biological_process	developmental process|immune system process|multicellular organismal process	1	371	6	6672	0.290646	0.807299	2.9973	circRNA_5526|Chr6:11219826_11221789_-
GO:0016447	somatic recombination of immunoglobulin gene segments	biological_process	cellular process|developmental process|immune system process|metabolic process|multicellular organismal process	1	371	6	6672	0.290646	0.807299	2.9973	circRNA_5526|Chr6:11219826_11221789_-
GO:0016459	myosin complex	cellular_component	cell|cell part|macromolecular complex|organelle|organelle part	2	371	57	6672	0.834162	0.919326	0.631011	circRNA_1093|Chr10:72203091_72212546_+;circRNA_6415|Chr8:64635064_64648503_+
GO:0016477	cell migration	biological_process	cellular process|localization|locomotion	14	371	191	6672	0.175878	0.807299	1.31819	circRNA_4051|Chr3:6464953_6472752_+;circRNA_2146|Chr14:88724076_88725530_-;circRNA_4346|Chr3:122130941_122141403_+;circRNA_6391|Chr8:60917720_60920949_-;circRNA_6046|Chr7:64125692_64131186_-;circRNA_3283|Chr19:61714402_61714542_+;circRNA_0485|Chr1:204960841_204961691_+;circRNA_3509|Chr2:113189774_113198013_-;circRNA_2439|Chr16:2354385_2354582_-;circRNA_2304|Chr15:41008529_41011344_+;circRNA_2562|…
GO:0016504	peptidase activator activity	molecular_function	enzyme regulator activity	2	371	17	6672	0.243383	0.807299	2.11574	circRNA_6937|Chr9:78945266_78947892_-;circRNA_6935|Chr9:78911759_78911926_+
GO:0016525	negative regulation of angiogenesis	biological_process	biological regulation|developmental process|multicellular organismal process|negative regulation of biological process|regulation of biological process	1	371	59	6672	0.966314	0.983578	0.304811	circRNA_2459|Chr16:7226824_7229432_-
GO:0016529	sarcoplasmic reticulum	cellular_component	cell|cell part|organelle	2	371	46	6672	0.734208	0.878053	0.781906	circRNA_3738|Chr2:210723584_210806489_-;circRNA_4948|Chr4:180711145_180722357_-
GO:0016567	protein ubiquitination	biological_process	cellular process|metabolic process	13	371	251	6672	0.646583	0.849862	0.931433	circRNA_6107|Chr7:76837537_76845975_-;circRNA_3621|Chr2:184309074_184309661_-;circRNA_2943|Chr18:31445709_31446694_-;circRNA_6407|Chr8:64171150_64184113_-;circRNA_5302|Chr5:135354650_135359472_+;circRNA_0102|Chr1:47030544_47032563_+;circRNA_6934|Chr9:78341845_78350281_-;circRNA_2847|Chr18:2018381_2018553_-;circRNA_3367|Chr2:30384653_30433774_-;circRNA_3216|Chr19:39543248_39545672_+;circRNA_6742|C…
GO:0016571	histone methylation	biological_process	cellular component organization or biogenesis|cellular process|metabolic process	1	371	35	6672	0.865698	0.93499	0.513824	circRNA_1063|Chr10:67363508_67364610_+
GO:0016572	histone phosphorylation	biological_process	cellular component organization or biogenesis|cellular process|metabolic process	1	371	13	6672	0.524998	0.816973	1.38337	circRNA_5806|Chr6:124625936_124680274_-
GO:0016575	histone deacetylation	biological_process	cellular component organization or biogenesis|cellular process|metabolic process	3	371	22	6672	0.120267	0.807299	2.45234	circRNA_0933|Chr10:43227922_43229953_+;circRNA_4750|Chr4:96739878_96745521_+;circRNA_4753|Chr4:96744220_96767151_+
GO:0016579	protein deubiquitination	biological_process	cellular process|metabolic process	1	371	45	6672	0.924475	0.968385	0.399641	circRNA_1840|Chr13:85397122_85399509_-
GO:0016589	NURF complex	cellular_component	cell|cell part|macromolecular complex|membrane-enclosed lumen|organelle|organelle part	1	371	7	6672	0.330125	0.807299	2.56912	circRNA_1231|Chr10:95327724_95328546_-
GO:0016592	mediator complex	cellular_component	cell|cell part|macromolecular complex|membrane-enclosed lumen|organelle|organelle part	1	371	24	6672	0.74729	0.883396	0.749326	circRNA_1658|Chr12:43576497_43576734_-
GO:0016601	Rac protein signal transduction	biological_process	biological regulation|cellular process|regulation of biological process|response to stimulus|signaling	1	371	20	6672	0.682064	0.858756	0.899191	circRNA_6894|Chr9:67242046_67257543_+
GO:0016604	nuclear body	cellular_component	cell|cell part|membrane-enclosed lumen|organelle|organelle part	12	371	201	6672	0.442618	0.807299	1.07366	circRNA_4347|Chr3:122318077_122318825_+;circRNA_4697|Chr4:66567829_66568912_-;circRNA_1636|Chr12:38305355_38317018_+;circRNA_3225|Chr19:42917629_42920390_-;circRNA_6407|Chr8:64171150_64184113_-;circRNA_3257|Chr19:54803498_54815443_+;circRNA_4927|Chr4:170518672_170520365_+;circRNA_4750|Chr4:96739878_96745521_+;circRNA_3223|Chr19:42856166_42920390_-;circRNA_3258|Chr19:54803498_54822499_+;circRNA_47…
GO:0016605	PML body	cellular_component	cell|cell part|membrane-enclosed lumen|organelle|organelle part	3	371	67	6672	0.72854	0.878053	0.805246	circRNA_4697|Chr4:66567829_66568912_-;circRNA_2284|Chr15:37190896_37218085_+;circRNA_5450|Chr5:167486001_167547741_+
GO:0016607	nuclear speck	cellular_component	cell|cell part|membrane-enclosed lumen|organelle|organelle part	16	371	200	6672	0.0897717	0.757703	1.43871	circRNA_6441|Chr8:68539308_68542150_+;circRNA_2360|Chr15:57348405_57351717_+;circRNA_0544|Chr1:220039308_220042767_-;circRNA_3634|Chr2:187243578_187246451_-;circRNA_6275|Chr8:12160079_12161683_+;circRNA_6212|Chr7:129690245_129708614_-;circRNA_1346|Chr11:34865447_34879143_+;circRNA_6211|Chr7:129678610_129680736_-;circRNA_0547|Chr1:220042074_220049075_-;circRNA_5778|Chr6:108862383_108883917_+;circR…
GO:0016705	oxidoreductase activity, acting on paired donors, with incorporation or reduction of molecular oxygen	molecular_function	catalytic activity	1	371	6	6672	0.290646	0.807299	2.9973	circRNA_6157|Chr7:116072198_116158807_-
GO:0016712	oxidoreductase activity, acting on paired donors, with incorporation or reduction of molecular oxygen, reduced flavin or flavoprotein as one donor, and incorporation of one atom of oxygen	molecular_function	catalytic activity	1	371	6	6672	0.290646	0.807299	2.9973	circRNA_5223|Chr5:115146569_115199307_-
GO:0016746	transferase activity, transferring acyl groups	molecular_function	catalytic activity	2	371	17	6672	0.243383	0.807299	2.11574	circRNA_4561|Chr4:22084945_22091386_+;circRNA_2690|Chr17:29730437_29737981_-
GO:0016757	transferase activity, transferring glycosyl groups	molecular_function	catalytic activity	3	371	20	6672	0.0964449	0.778773	2.69757	circRNA_0225|Chr1:127025462_127025957_+;circRNA_2887|Chr18:15480332_15494701_+;circRNA_6169|Chr7:119987740_119990307_-
GO:0016787	hydrolase activity	molecular_function	catalytic activity	1	371	23	6672	0.732356	0.878053	0.781906	circRNA_0722|Chr1:261165387_261165588_-
GO:0016817	hydrolase activity, acting on acid anhydrides	molecular_function	catalytic activity	1	371	5	6672	0.248846	0.807299	3.59677	circRNA_3117|Chr19:17493068_17494680_-
GO:0016868	intramolecular transferase activity, phosphotransferases	molecular_function	catalytic activity	2	371	7	6672	0.0537688	0.612665	5.13824	circRNA_0613|Chr1:242716557_242737019_-;circRNA_0609|Chr1:242607845_242631822_-
GO:0016887	ATPase activity	molecular_function	catalytic activity	9	371	116	6672	0.195572	0.807299	1.3953	circRNA_1738|Chr13:52667988_52673721_+;circRNA_1867|Chr13:97022518_97023051_-;circRNA_3885|Chr20:4896892_4921063_-;circRNA_1447|Chr11:81375744_81376852_-;circRNA_1093|Chr10:72203091_72212546_+;circRNA_4927|Chr4:170518672_170520365_+;circRNA_3773|Chr2:225348168_225352508_-;circRNA_2726|Chr17:54209230_54209739_+;circRNA_5526|Chr6:11219826_11221789_-
GO:0017015	regulation of transforming growth factor beta receptor signaling pathway	biological_process	biological regulation|cellular process|regulation of biological process|response to stimulus|signaling	1	371	20	6672	0.682064	0.858756	0.899191	circRNA_3057|Chr18:72593000_72595275_+
GO:0017016	Ras GTPase binding	molecular_function	binding	1	371	34	6672	0.857748	0.931308	0.528936	circRNA_3733|Chr2:208198684_208203924_-
GO:0017022	myosin binding	molecular_function	binding	1	371	26	6672	0.774711	0.894571	0.691686	circRNA_4658|Chr4:62270233_62272586_+
GO:0017025	TBP-class protein binding	molecular_function	binding	1	371	8	6672	0.367413	0.807299	2.24798	circRNA_1458|Chr11:84571220_84583542_-
GO:0017048	Rho GTPase binding	molecular_function	binding	8	371	60	6672	0.0171667	0.451397	2.39784	circRNA_1267|Chr10:109754906_109755050_+;circRNA_2378|Chr15:70098761_70139170_-;circRNA_1266|Chr10:109754888_109755050_+;circRNA_2432|Chr16:2138232_2142317_-;circRNA_6046|Chr7:64125692_64131186_-;circRNA_2375|Chr15:70077466_70105489_-;circRNA_1265|Chr10:109754865_109755050_+;circRNA_2377|Chr15:70098761_70105489_-
GO:0017053	transcriptional repressor complex	cellular_component	macromolecular complex	1	371	32	6672	0.840411	0.919804	0.561995	circRNA_4186|Chr3:59678949_59680308_-
GO:0017056	structural constituent of nuclear pore	molecular_function	structural molecule activity	1	371	11	6672	0.467307	0.807299	1.63489	circRNA_4062|Chr3:8887351_8892631_+
GO:0017080	sodium channel regulator activity	molecular_function	channel regulator activity	1	371	18	6672	0.643406	0.848633	0.999102	circRNA_3556|Chr2:128642780_128668115_-
GO:0017112	Rab guanyl-nucleotide exchange factor activity	molecular_function	binding	3	371	69	6672	0.746797	0.883396	0.781906	circRNA_4699|Chr4:67299951_67301045_-;circRNA_6461|Chr8:70387427_70390893_+;circRNA_0357|Chr1:175200414_175218889_-
GO:0017124	SH3 domain binding	molecular_function	binding	7	371	89	6672	0.224833	0.807299	1.41446	circRNA_6219|Chr7:130522030_130524289_+;circRNA_1878|Chr13:100347405_100353039_-;circRNA_4346|Chr3:122130941_122141403_+;circRNA_0290|Chr1:154405931_154425509_+;circRNA_4285|Chr3:104816866_104818862_+;circRNA_6894|Chr9:67242046_67257543_+;circRNA_0028|Chr1:13262070_13268495_+
GO:0017127	cholesterol transporter activity	molecular_function	transporter activity	1	371	8	6672	0.367413	0.807299	2.24798	circRNA_1942|Chr14:5870915_5943886_+
GO:0017134	fibroblast growth factor binding	molecular_function	binding	1	371	15	6672	0.576456	0.832613	1.19892	circRNA_0447|Chr1:200606971_200615170_-
GO:0017137	Rab GTPase binding	molecular_function	binding	6	371	152	6672	0.857251	0.931308	0.709888	circRNA_0290|Chr1:154405931_154425509_+;circRNA_4098|Chr3:21782079_21792112_+;circRNA_6811|Chr9:46123188_46125984_-;circRNA_4094|Chr3:21721366_21736929_+;circRNA_5077|Chr5:58870933_58873011_+;circRNA_1923|Chr14:2924636_2924865_+
GO:0017148	negative regulation of translation	biological_process	biological regulation|cellular process|metabolic process|negative regulation of biological process|regulation of biological process	4	371	48	6672	0.276607	0.807299	1.49865	circRNA_0544|Chr1:220039308_220042767_-;circRNA_0547|Chr1:220042074_220049075_-;circRNA_2258|Chr15:23840157_23853169_+;circRNA_0543|Chr1:220039308_220040146_-
GO:0017151	DEAD/H-box RNA helicase binding	molecular_function	binding	1	371	8	6672	0.367413	0.807299	2.24798	circRNA_3152|Chr19:32214551_32215127_+
GO:0017156	calcium ion regulated exocytosis	biological_process	cellular process|establishment of localization|localization	1	371	16	6672	0.60006	0.842385	1.12399	circRNA_4863|Chr4:151118221_151123637_-
GO:0017166	vinculin binding	molecular_function	binding	1	371	25	6672	0.761393	0.889503	0.719353	circRNA_0011|Chr1:6601452_6613874_-
GO:0018105	peptidyl-serine phosphorylation	biological_process	cellular process|metabolic process	7	371	127	6672	0.565444	0.832613	0.991235	circRNA_4697|Chr4:66567829_66568912_-;circRNA_3572|Chr2:144876416_144917472_+;circRNA_1346|Chr11:34865447_34879143_+;circRNA_1349|Chr11:34879058_34932316_+;circRNA_0857|Chr10:13944932_13945211_+;circRNA_4448|Chr3:156690910_156699465_+;circRNA_1270|Chr10:110157631_110164041_-
GO:0018107	peptidyl-threonine phosphorylation	biological_process	cellular process|metabolic process	4	371	55	6672	0.366148	0.807299	1.30791	circRNA_4697|Chr4:66567829_66568912_-;circRNA_3572|Chr2:144876416_144917472_+;circRNA_1346|Chr11:34865447_34879143_+;circRNA_1349|Chr11:34879058_34932316_+
GO:0018108	peptidyl-tyrosine phosphorylation	biological_process	cellular process|metabolic process	5	371	81	6672	0.471925	0.810254	1.11011	circRNA_6391|Chr8:60917720_60920949_-;circRNA_1346|Chr11:34865447_34879143_+;circRNA_0447|Chr1:200606971_200615170_-;circRNA_1349|Chr11:34879058_34932316_+;circRNA_6894|Chr9:67242046_67257543_+
GO:0018149	peptide cross-linking	biological_process	cellular process|metabolic process	6	371	19	6672	0.000414647	0.123365	5.6791	circRNA_6828|Chr9:52047552_52048745_+;circRNA_6937|Chr9:78945266_78947892_-;circRNA_6830|Chr9:52048089_52048881_+;circRNA_6827|Chr9:52047552_52047844_+;circRNA_6825|Chr9:52043678_52045132_+;circRNA_6935|Chr9:78911759_78911926_+
GO:0018916	nitrobenzene metabolic process	biological_process	cellular process|metabolic process	3	371	8	6672	0.0077439	0.293409	6.74394	circRNA_3745|Chr2:210808354_210822401_-;circRNA_3744|Chr2:210806416_210806638_+;circRNA_3738|Chr2:210723584_210806489_-
GO:0019003	GDP binding	molecular_function	binding	2	371	27	6672	0.447726	0.807299	1.33214	circRNA_4837|Chr4:140870957_140872418_+;circRNA_5687|Chr6:76020953_76031336_+
GO:0019005	SCF ubiquitin ligase complex	cellular_component	cell|cell part|macromolecular complex	2	371	23	6672	0.368635	0.807299	1.56381	circRNA_3621|Chr2:184309074_184309661_-;circRNA_6407|Chr8:64171150_64184113_-
GO:0019208	phosphatase regulator activity	molecular_function	enzyme regulator activity	2	371	27	6672	0.447726	0.807299	1.33214	circRNA_6001|Chr7:51425330_51432888_-;circRNA_0357|Chr1:175200414_175218889_-
GO:0019217	regulation of fatty acid metabolic process	biological_process	biological regulation|cellular process|metabolic process|regulation of biological process	1	371	8	6672	0.367413	0.807299	2.24798	circRNA_6658|Chr8:118616528_118620855_+
GO:0019221	cytokine-mediated signaling pathway	biological_process	biological regulation|cellular process|regulation of biological process|response to stimulus|signaling	2	371	31	6672	0.520964	0.816973	1.16025	circRNA_7247|ChrX:157322637_157323315_+;circRNA_3670|Chr2:189226433_189230967_-
GO:0019229	regulation of vasoconstriction	biological_process	biological regulation|multicellular organismal process|regulation of biological process	1	371	7	6672	0.330125	0.807299	2.56912	circRNA_4863|Chr4:151118221_151123637_-
GO:0019237	centromeric DNA binding	molecular_function	binding	1	371	5	6672	0.248846	0.807299	3.59677	circRNA_5526|Chr6:11219826_11221789_-
GO:0019388	galactose catabolic process	biological_process	metabolic process	2	371	8	6672	0.0691104	0.671779	4.49596	circRNA_0613|Chr1:242716557_242737019_-;circRNA_0609|Chr1:242607845_242631822_-
GO:0019722	calcium-mediated signaling	biological_process	biological regulation|cellular process|regulation of biological process|response to stimulus|signaling	1	371	28	6672	0.799163	0.907577	0.64228	circRNA_4795|Chr4:117422680_117436312_+
GO:0019800	peptide cross-linking via chondroitin 4-sulfate glycosaminoglycan	biological_process	cellular process|metabolic process	1	371	8	6672	0.367413	0.807299	2.24798	circRNA_7247|ChrX:157322637_157323315_+
GO:0019827	stem cell population maintenance	biological_process	developmental process|multicellular organismal process	1	371	22	6672	0.716542	0.871665	0.817447	circRNA_3458|Chr2:57539193_57544062_-
GO:0019829	cation-transporting ATPase activity	molecular_function	catalytic activity|transporter activity	2	371	6	6672	0.0398481	0.559784	5.99461	circRNA_5986|Chr7:41167312_41167751_+;circRNA_5987|Chr7:41167312_41178782_+
GO:0019882	antigen processing and presentation	biological_process	immune system process	1	371	18	6672	0.643406	0.848633	0.999102	circRNA_3332|Chr2:24067948_24083767_+
GO:0019888	protein phosphatase regulator activity	molecular_function	enzyme regulator activity	3	371	18	6672	0.0748262	0.706419	2.9973	circRNA_0763|Chr1:274700623_274701534_+;circRNA_0761|Chr1:274688579_274718538_+;circRNA_7033|Chr9:113534327_113535129_+
GO:0019894	kinesin binding	molecular_function	binding	1	371	36	6672	0.873205	0.939635	0.499551	circRNA_1547|Chr12:13717791_13718009_-
GO:0019898	extrinsic component of membrane	cellular_component	membrane|membrane part	1	371	58	6672	0.964312	0.982027	0.310066	circRNA_0594|Chr1:235750193_235761819_-
GO:0019899	enzyme binding	molecular_function	binding	13	371	243	6672	0.599415	0.842385	0.962098	circRNA_3745|Chr2:210808354_210822401_-;circRNA_3744|Chr2:210806416_210806638_+;circRNA_4863|Chr4:151118221_151123637_-;circRNA_3738|Chr2:210723584_210806489_-;circRNA_6937|Chr9:78945266_78947892_-;circRNA_3225|Chr19:42917629_42920390_-;circRNA_2275|Chr15:36823412_36828644_+;circRNA_6935|Chr9:78911759_78911926_+;circRNA_5526|Chr6:11219826_11221789_-;circRNA_5163|Chr5:90817794_90827570_+;circRNA_3…
GO:0019900	kinase binding	molecular_function	binding	1	371	46	6672	0.928703	0.968667	0.390953	circRNA_3283|Chr19:61714402_61714542_+
GO:0019901	protein kinase binding	molecular_function	binding	21	371	320	6672	0.243563	0.807299	1.18019	circRNA_6568|Chr8:93334030_93350656_-;circRNA_3745|Chr2:210808354_210822401_-;circRNA_1267|Chr10:109754906_109755050_+;circRNA_3744|Chr2:210806416_210806638_+;circRNA_1547|Chr12:13717791_13718009_-;circRNA_0233|Chr1:128239552_128243030_-;circRNA_1266|Chr10:109754888_109755050_+;circRNA_0649|Chr1:252537818_252539458_-;circRNA_0722|Chr1:261165387_261165588_-;circRNA_3283|Chr19:61714402_61714542_+;c…
GO:0019902	phosphatase binding	molecular_function	binding	3	371	62	6672	0.678428	0.858756	0.870185	circRNA_6001|Chr7:51425330_51432888_-;circRNA_0357|Chr1:175200414_175218889_-;circRNA_3057|Chr18:72593000_72595275_+
GO:0019903	protein phosphatase binding	molecular_function	binding	4	371	78	6672	0.637691	0.848633	0.922248	circRNA_0763|Chr1:274700623_274701534_+;circRNA_3332|Chr2:24067948_24083767_+;circRNA_0038|Chr1:15545013_15551204_+;circRNA_0761|Chr1:274688579_274718538_+
GO:0019904	protein domain specific binding	molecular_function	binding	10	371	226	6672	0.815834	0.913126	0.795745	circRNA_6107|Chr7:76837537_76845975_-;circRNA_4863|Chr4:151118221_151123637_-;circRNA_3283|Chr19:61714402_61714542_+;circRNA_3620|Chr2:183555214_183558410_-;circRNA_0038|Chr1:15545013_15551204_+;circRNA_3373|Chr2:30564530_30566431_-;circRNA_5962|Chr7:29284390_29288495_+;circRNA_6753|Chr9:18653895_18660843_+;circRNA_0857|Chr10:13944932_13945211_+;circRNA_4448|Chr3:156690910_156699465_+
GO:0019905	syntaxin binding	molecular_function	binding	1	371	55	6672	0.957566	0.980024	0.326979	circRNA_0939|Chr10:45771832_45778634_-
GO:0019941	modification-dependent protein catabolic process	biological_process	cellular process|metabolic process	1	371	5	6672	0.248846	0.807299	3.59677	circRNA_4859|Chr4:148256642_148258399_+
GO:0019960	C-X3-C chemokine binding	molecular_function	binding	1	371	6	6672	0.290646	0.807299	2.9973	circRNA_3283|Chr19:61714402_61714542_+
GO:0020037	heme binding	molecular_function	binding	5	371	28	6672	0.0176311	0.452017	3.2114	circRNA_0342|Chr1:168958579_168964665_+;circRNA_0868|Chr10:15577563_15589574_-;circRNA_6157|Chr7:116072198_116158807_-;circRNA_0869|Chr10:15577563_15603016_-;circRNA_5223|Chr5:115146569_115199307_-
GO:0021510	spinal cord development	biological_process	developmental process|multicellular organismal process	3	371	29	6672	0.216635	0.807299	1.8604	circRNA_1288|Chr11:10020678_10022991_+;circRNA_0857|Chr10:13944932_13945211_+;circRNA_1063|Chr10:67363508_67364610_+
GO:0021542	dentate gyrus development	biological_process	developmental process|multicellular organismal process	1	371	6	6672	0.290646	0.807299	2.9973	circRNA_0647|Chr1:251455609_251485480_+
GO:0021549	cerebellum development	biological_process	developmental process|multicellular organismal process	1	371	57	6672	0.962191	0.980685	0.315506	circRNA_5450|Chr5:167486001_167547741_+
GO:0021691	cerebellar Purkinje cell layer maturation	biological_process	developmental process|multicellular organismal process	1	371	14	6672	0.551462	0.825583	1.28456	circRNA_5450|Chr5:167486001_167547741_+
GO:0021702	cerebellar Purkinje cell differentiation	biological_process	cellular process|developmental process|multicellular organismal process	1	371	24	6672	0.74729	0.883396	0.749326	circRNA_2614|Chr17:5511386_5548199_+
GO:0021756	striatum development	biological_process	developmental process|multicellular organismal process	1	371	13	6672	0.524998	0.816973	1.38337	circRNA_4829|Chr4:131439626_131453028_-
GO:0021766	hippocampus development	biological_process	developmental process|multicellular organismal process	1	371	48	6672	0.936464	0.973979	0.374663	circRNA_2726|Chr17:54209230_54209739_+
GO:0021769	orbitofrontal cortex development	biological_process	developmental process|multicellular organismal process	1	371	5	6672	0.248846	0.807299	3.59677	circRNA_0447|Chr1:200606971_200615170_-
GO:0021772	olfactory bulb development	biological_process	developmental process|multicellular organismal process	1	371	28	6672	0.799163	0.907577	0.64228	circRNA_2614|Chr17:5511386_5548199_+
GO:0021847	ventricular zone neuroblast division	biological_process	cellular process|developmental process|multicellular organismal process	1	371	5	6672	0.248846	0.807299	3.59677	circRNA_0447|Chr1:200606971_200615170_-
GO:0021860	pyramidal neuron development	biological_process	cellular process|developmental process|multicellular organismal process	1	371	6	6672	0.290646	0.807299	2.9973	circRNA_0447|Chr1:200606971_200615170_-
GO:0021884	forebrain neuron development	biological_process	cellular process|developmental process|multicellular organismal process	1	371	6	6672	0.290646	0.807299	2.9973	circRNA_0591|Chr1:233578229_233581182_+
GO:0021915	neural tube development	biological_process	developmental process|multicellular organismal process	3	371	60	6672	0.656562	0.852917	0.899191	circRNA_6103|Chr7:76114791_76119201_+;circRNA_0857|Chr10:13944932_13945211_+;circRNA_7065|ChrX:4819220_4832241_-
GO:0021930	cerebellar granule cell precursor proliferation	biological_process	developmental process|multicellular organismal process	1	371	15	6672	0.576456	0.832613	1.19892	circRNA_5450|Chr5:167486001_167547741_+
GO:0021942	radial glia guided migration of Purkinje cell	biological_process	cellular process|developmental process|localization|locomotion|multicellular organismal process	1	371	19	6672	0.663288	0.852917	0.946517	circRNA_5450|Chr5:167486001_167547741_+
GO:0021943	formation of radial glial scaffolds	biological_process	cellular component organization or biogenesis|cellular process|developmental process|localization|locomotion|multicellular organismal process	1	371	17	6672	0.622353	0.847573	1.05787	circRNA_3283|Chr19:61714402_61714542_+
GO:0021952	central nervous system projection neuron axonogenesis	biological_process	cellular component organization or biogenesis|cellular process|developmental process|multicellular organismal process	1	371	6	6672	0.290646	0.807299	2.9973	circRNA_3572|Chr2:144876416_144917472_+
GO:0021955	central nervous system neuron axonogenesis	biological_process	cellular component organization or biogenesis|cellular process|developmental process|multicellular organismal process	1	371	21	6672	0.699797	0.864628	0.856373	circRNA_0647|Chr1:251455609_251485480_+
GO:0021987	cerebral cortex development	biological_process	developmental process|multicellular organismal process	4	371	80	6672	0.65753	0.852917	0.899191	circRNA_6828|Chr9:52047552_52048745_+;circRNA_6830|Chr9:52048089_52048881_+;circRNA_6827|Chr9:52047552_52047844_+;circRNA_6825|Chr9:52043678_52045132_+
GO:0022008	neurogenesis	biological_process	cellular process|developmental process|multicellular organismal process	2	371	24	6672	0.388875	0.807299	1.49865	circRNA_2985|Chr18:51805551_51807909_+;circRNA_2562|Chr16:63915078_63933482_+
GO:0022027	interkinetic nuclear migration	biological_process	developmental process|establishment of localization|localization|multicellular organismal process	1	371	13	6672	0.524998	0.816973	1.38337	circRNA_5232|Chr5:117620103_117623151_-
GO:0022409	positive regulation of cell-cell adhesion	biological_process	biological adhesion|biological regulation|positive regulation of biological process|regulation of biological process	2	371	6	6672	0.0398481	0.559784	5.99461	circRNA_1867|Chr13:97022518_97023051_-;circRNA_4346|Chr3:122130941_122141403_+
GO:0022604	regulation of cell morphogenesis	biological_process	biological regulation|cellular component organization or biogenesis|cellular process|developmental process|regulation of biological process	4	371	59	6672	0.417374	0.807299	1.21924	circRNA_0485|Chr1:204960841_204961691_+;circRNA_5150|Chr5:76925720_76926914_+;circRNA_2284|Chr15:37190896_37218085_+;circRNA_5414|Chr5:157690578_157712883_+
GO:0022612	gland morphogenesis	biological_process	developmental process|multicellular organismal process	1	371	5	6672	0.248846	0.807299	3.59677	circRNA_0447|Chr1:200606971_200615170_-
GO:0022857	transmembrane transporter activity	molecular_function	transporter activity	1	371	15	6672	0.576456	0.832613	1.19892	circRNA_4593|Chr4:31220330_31319352_+
GO:0023014	signal transduction by protein phosphorylation	biological_process	biological regulation|cellular process|metabolic process|regulation of biological process|response to stimulus|signaling	1	371	89	6672	0.994064	0.996518	0.202065	circRNA_7179|ChrX:109996163_110063748_+
GO:0023019	signal transduction involved in regulation of gene expression	biological_process	biological regulation|cellular process|regulation of biological process|response to stimulus|signaling	1	371	7	6672	0.330125	0.807299	2.56912	circRNA_3057|Chr18:72593000_72595275_+
GO:0030008	TRAPP complex	cellular_component	cell|cell part|macromolecular complex	1	371	12	6672	0.496977	0.810254	1.49865	circRNA_2528|Chr16:47896917_47910476_+
GO:0030010	establishment of cell polarity	biological_process	cellular process	2	371	35	6672	0.58743	0.842385	1.02765	circRNA_1867|Chr13:97022518_97023051_-;circRNA_0857|Chr10:13944932_13945211_+
GO:0030016	myofibril	cellular_component	cell|cell part|organelle	2	371	56	6672	0.826711	0.917779	0.64228	circRNA_1738|Chr13:52667988_52673721_+;circRNA_4658|Chr4:62270233_62272586_+
GO:0030017	sarcomere	cellular_component	cell|cell part|organelle|organelle part	1	371	15	6672	0.576456	0.832613	1.19892	circRNA_1738|Chr13:52667988_52673721_+
GO:0030018	Z disc	cellular_component	cell|cell part|organelle|organelle part	9	371	143	6672	0.400293	0.807299	1.13185	circRNA_0613|Chr1:242716557_242737019_-;circRNA_4863|Chr4:151118221_151123637_-;circRNA_5368|Chr5:147482283_147483432_+;circRNA_6953|Chr9:82558343_82558587_+;circRNA_7047|Chr9:119309035_119311107_-;circRNA_5414|Chr5:157690578_157712883_+;circRNA_6001|Chr7:51425330_51432888_-;circRNA_6952|Chr9:82557123_82558587_+;circRNA_0609|Chr1:242607845_242631822_-
GO:0030027	lamellipodium	cellular_component	cell|cell part	10	371	168	6672	0.459273	0.807299	1.07047	circRNA_4776|Chr4:115221467_115224878_-;circRNA_1878|Chr13:100347405_100353039_-;circRNA_0649|Chr1:252537818_252539458_-;circRNA_3283|Chr19:61714402_61714542_+;circRNA_1315|Chr11:31974630_31979720_+;circRNA_2304|Chr15:41008529_41011344_+;circRNA_5414|Chr5:157690578_157712883_+;circRNA_6894|Chr9:67242046_67257543_+;circRNA_0650|Chr1:252537894_252539495_+;circRNA_3514|Chr2:113744312_113745181_+
GO:0030030	cell projection organization	biological_process	cellular component organization or biogenesis|cellular process	1	371	13	6672	0.524998	0.816973	1.38337	circRNA_5414|Chr5:157690578_157712883_+
GO:0030032	lamellipodium assembly	biological_process	cellular component organization or biogenesis|cellular process	2	371	34	6672	0.571473	0.832613	1.05787	circRNA_2304|Chr15:41008529_41011344_+;circRNA_5414|Chr5:157690578_157712883_+
GO:0030033	microvillus assembly	biological_process	cellular component organization or biogenesis|cellular process	1	371	6	6672	0.290646	0.807299	2.9973	circRNA_3733|Chr2:208198684_208203924_-
GO:0030036	actin cytoskeleton organization	biological_process	cellular component organization or biogenesis|cellular process	6	371	135	6672	0.769881	0.894571	0.799281	circRNA_2378|Chr15:70098761_70139170_-;circRNA_1878|Chr13:100347405_100353039_-;circRNA_2375|Chr15:70077466_70105489_-;circRNA_5414|Chr5:157690578_157712883_+;circRNA_2377|Chr15:70098761_70105489_-;circRNA_1029|Chr10:62751173_62767418_-
GO:0030049	muscle filament sliding	biological_process	cellular process|multicellular organismal process	1	371	7	6672	0.330125	0.807299	2.56912	circRNA_1738|Chr13:52667988_52673721_+
GO:0030054	cell junction	cellular_component	NA	13	371	200	6672	0.320144	0.807299	1.16895	circRNA_6219|Chr7:130522030_130524289_+;circRNA_1878|Chr13:100347405_100353039_-;circRNA_0052|Chr1:20961258_20962540_-;circRNA_4403|Chr3:145092634_145129362_+;circRNA_4402|Chr3:145092634_145098350_+;circRNA_4139|Chr3:45365578_45372679_+;circRNA_2819|Chr17:87758882_87760775_-;circRNA_2258|Chr15:23840157_23853169_+;circRNA_3733|Chr2:208198684_208203924_-;circRNA_1315|Chr11:31974630_31979720_+;circR…
GO:0030055	cell-substrate junction	cellular_component	cell junction	2	371	23	6672	0.368635	0.807299	1.56381	circRNA_0613|Chr1:242716557_242737019_-;circRNA_0609|Chr1:242607845_242631822_-
GO:0030056	hemidesmosome	cellular_component	cell junction	1	371	14	6672	0.551462	0.825583	1.28456	circRNA_3283|Chr19:61714402_61714542_+
GO:0030057	desmosome	cellular_component	cell junction	1	371	9	6672	0.402631	0.807299	1.9982	circRNA_4139|Chr3:45365578_45372679_+
GO:0030073	insulin secretion	biological_process	biological regulation|cellular process|establishment of localization|localization|signaling	2	371	27	6672	0.447726	0.807299	1.33214	circRNA_4863|Chr4:151118221_151123637_-;circRNA_3057|Chr18:72593000_72595275_+
GO:0030097	hemopoiesis	biological_process	developmental process|immune system process|multicellular organismal process	8	371	42	6672	0.00188764	0.256981	3.42549	circRNA_5523|Chr6:10920914_10923681_+;circRNA_0290|Chr1:154405931_154425509_+;circRNA_5524|Chr6:10937102_10938824_+;circRNA_5525|Chr6:10961830_10979314_+;circRNA_6753|Chr9:18653895_18660843_+;circRNA_3815|Chr2:238742934_238746181_-;circRNA_4413|Chr3:148837814_148842440_+;circRNA_4416|Chr3:148837814_148862118_+
GO:0030099	myeloid cell differentiation	biological_process	cellular process|developmental process|immune system process|multicellular organismal process	1	371	9	6672	0.402631	0.807299	1.9982	circRNA_3815|Chr2:238742934_238746181_-
GO:0030100	regulation of endocytosis	biological_process	biological regulation|cellular component organization or biogenesis|cellular process|establishment of localization|localization|regulation of biological process	2	371	25	6672	0.408823	0.807299	1.43871	circRNA_0290|Chr1:154405931_154425509_+;circRNA_2819|Chr17:87758882_87760775_-
GO:0030122	AP-2 adaptor complex	cellular_component	cell|cell part|macromolecular complex|membrane|membrane part|organelle|organelle part	1	371	26	6672	0.774711	0.894571	0.691686	circRNA_0290|Chr1:154405931_154425509_+
GO:0030123	AP-3 adaptor complex	cellular_component	cell|cell part|macromolecular complex|membrane|membrane part	1	371	20	6672	0.682064	0.858756	0.899191	circRNA_3332|Chr2:24067948_24083767_+
GO:0030127	COPII vesicle coat	cellular_component	cell|cell part|macromolecular complex|membrane|membrane part|organelle|organelle part	1	371	15	6672	0.576456	0.832613	1.19892	circRNA_3792|Chr2:230311167_230317038_-
GO:0030130	clathrin coat of trans-Golgi network vesicle	cellular_component	cell|cell part|macromolecular complex|membrane|membrane part|organelle|organelle part	1	371	6	6672	0.290646	0.807299	2.9973	circRNA_1079|Chr10:71297308_71306105_+
GO:0030131	clathrin adaptor complex	cellular_component	cell|cell part|macromolecular complex|membrane|membrane part	1	371	18	6672	0.643406	0.848633	0.999102	circRNA_3332|Chr2:24067948_24083767_+
GO:0030132	clathrin coat of coated pit	cellular_component	cell|cell part|macromolecular complex|membrane|membrane part	1	371	16	6672	0.60006	0.842385	1.12399	circRNA_0290|Chr1:154405931_154425509_+
GO:0030133	transport vesicle	cellular_component	cell|cell part|organelle	1	371	21	6672	0.699797	0.864628	0.856373	circRNA_7247|ChrX:157322637_157323315_+
GO:0030134	COPII-coated ER to Golgi transport vesicle	cellular_component	cell|cell part|organelle|organelle part	1	371	17	6672	0.622353	0.847573	1.05787	circRNA_3792|Chr2:230311167_230317038_-
GO:0030136	clathrin-coated vesicle	cellular_component	cell|cell part|organelle	1	371	39	6672	0.893308	0.950626	0.461124	circRNA_0290|Chr1:154405931_154425509_+
GO:0030139	endocytic vesicle	cellular_component	cell|cell part|organelle	4	371	42	6672	0.203391	0.807299	1.71275	circRNA_1315|Chr11:31974630_31979720_+;circRNA_3373|Chr2:30564530_30566431_-;circRNA_2726|Chr17:54209230_54209739_+;circRNA_3514|Chr2:113744312_113745181_+
GO:0030141	secretory granule	cellular_component	cell|cell part|organelle	1	371	43	6672	0.915253	0.964142	0.418229	circRNA_1147|Chr10:82752455_82752793_+
GO:0030145	manganese ion binding	molecular_function	binding	1	371	20	6672	0.682064	0.858756	0.899191	circRNA_6574|Chr8:94283953_94292111_-
GO:0030154	cell differentiation	biological_process	cellular process|developmental process	7	371	207	6672	0.947683	0.975262	0.608149	circRNA_1272|Chr10:110495072_110500097_+;circRNA_0029|Chr1:13696687_13704515_+;circRNA_0447|Chr1:200606971_200615170_-;circRNA_2562|Chr16:63915078_63933482_+;circRNA_2372|Chr15:61826710_61827008_+;circRNA_4829|Chr4:131439626_131453028_-;circRNA_2849|Chr18:2445774_2446986_+
GO:0030155	regulation of cell adhesion	biological_process	biological adhesion|biological regulation|regulation of biological process	2	371	36	6672	0.602942	0.844119	0.999102	circRNA_6001|Chr7:51425330_51432888_-;circRNA_0857|Chr10:13944932_13945211_+
GO:0030159	receptor signaling complex scaffold activity	molecular_function	binding|structural molecule activity	1	371	12	6672	0.496977	0.810254	1.49865	circRNA_6219|Chr7:130522030_130524289_+
GO:0030165	PDZ domain binding	molecular_function	binding	4	371	88	6672	0.729411	0.878053	0.817447	circRNA_5986|Chr7:41167312_41167751_+;circRNA_5987|Chr7:41167312_41178782_+;circRNA_0647|Chr1:251455609_251485480_+;circRNA_5662|Chr6:60609626_60618957_+
GO:0030170	pyridoxal phosphate binding	molecular_function	binding	1	371	7	6672	0.330125	0.807299	2.56912	circRNA_0728|Chr1:263249208_263253633_-
GO:0030175	filopodium	cellular_component	cell|cell part	8	371	58	6672	0.0141543	0.42121	2.48053	circRNA_4776|Chr4:115221467_115224878_-;circRNA_1878|Chr13:100347405_100353039_-;circRNA_0649|Chr1:252537818_252539458_-;circRNA_3283|Chr19:61714402_61714542_+;circRNA_2304|Chr15:41008529_41011344_+;circRNA_2411|Chr15:106417736_106434369_+;circRNA_0650|Chr1:252537894_252539495_+;circRNA_0011|Chr1:6601452_6613874_-
GO:0030177	positive regulation of Wnt signaling pathway	biological_process	biological regulation|cellular process|positive regulation of biological process|regulation of biological process|response to stimulus|signaling	3	371	35	6672	0.308184	0.807299	1.54147	circRNA_0485|Chr1:204960841_204961691_+;circRNA_0447|Chr1:200606971_200615170_-;circRNA_1270|Chr10:110157631_110164041_-
GO:0030182	neuron differentiation	biological_process	cellular process|developmental process|multicellular organismal process	2	371	57	6672	0.834162	0.919326	0.631011	circRNA_4697|Chr4:66567829_66568912_-;circRNA_6753|Chr9:18653895_18660843_+
GO:0030183	B cell differentiation	biological_process	cellular process|developmental process|immune system process|multicellular organismal process	2	371	17	6672	0.243383	0.807299	2.11574	circRNA_4186|Chr3:59678949_59680308_-;circRNA_5526|Chr6:11219826_11221789_-
GO:0030198	extracellular matrix organization	biological_process	cellular component organization or biogenesis|cellular process	4	371	71	6672	0.562655	0.832613	1.01317	circRNA_6937|Chr9:78945266_78947892_-;circRNA_6935|Chr9:78911759_78911926_+;circRNA_2034|Chr14:43420836_43461320_+;circRNA_1363|Chr11:46324401_46341113_-
GO:0030199	collagen fibril organization	biological_process	cellular component organization or biogenesis|cellular process	6	371	45	6672	0.0369006	0.559784	2.39784	circRNA_6828|Chr9:52047552_52048745_+;circRNA_4051|Chr3:6464953_6472752_+;circRNA_6830|Chr9:52048089_52048881_+;circRNA_1147|Chr10:82752455_82752793_+;circRNA_6827|Chr9:52047552_52047844_+;circRNA_6825|Chr9:52043678_52045132_+
GO:0030217	T cell differentiation	biological_process	cellular process|developmental process|immune system process|multicellular organismal process	3	371	20	6672	0.0964449	0.778773	2.69757	circRNA_4186|Chr3:59678949_59680308_-;circRNA_3203|Chr19:38057557_38062193_+;circRNA_6753|Chr9:18653895_18660843_+
GO:0030218	erythrocyte differentiation	biological_process	biological regulation|cellular process|developmental process|immune system process|multicellular organismal process	1	371	26	6672	0.774711	0.894571	0.691686	circRNA_4186|Chr3:59678949_59680308_-
GO:0030224	monocyte differentiation	biological_process	cellular process|developmental process|immune system process|multicellular organismal process	1	371	10	6672	0.435893	0.807299	1.79838	circRNA_4186|Chr3:59678949_59680308_-
GO:0030252	growth hormone secretion	biological_process	biological regulation|cellular process|establishment of localization|localization|signaling	1	371	7	6672	0.330125	0.807299	2.56912	circRNA_4863|Chr4:151118221_151123637_-
GO:0030275	LRR domain binding	molecular_function	binding	1	371	5	6672	0.248846	0.807299	3.59677	circRNA_1288|Chr11:10020678_10022991_+
GO:0030276	clathrin binding	molecular_function	binding	3	371	70	6672	0.755552	0.888553	0.770735	circRNA_0290|Chr1:154405931_154425509_+;circRNA_6781|Chr9:30155195_30155808_+;circRNA_3556|Chr2:128642780_128668115_-
GO:0030278	regulation of ossification	biological_process	biological regulation|multicellular organismal process|regulation of biological process	1	371	19	6672	0.663288	0.852917	0.946517	circRNA_6753|Chr9:18653895_18660843_+
GO:0030279	negative regulation of ossification	biological_process	biological regulation|multicellular organismal process|negative regulation of biological process|regulation of biological process	1	371	6	6672	0.290646	0.807299	2.9973	circRNA_0225|Chr1:127025462_127025957_+
GO:0030282	bone mineralization	biological_process	developmental process|multicellular organismal process	1	371	12	6672	0.496977	0.810254	1.49865	circRNA_0447|Chr1:200606971_200615170_-
GO:0030289	protein phosphatase 4 complex	cellular_component	cell|cell part|macromolecular complex	1	371	6	6672	0.290646	0.807299	2.9973	circRNA_7033|Chr9:113534327_113535129_+
GO:0030307	positive regulation of cell growth	biological_process	biological regulation|cellular component organization or biogenesis|cellular process|growth|positive regulation of biological process|regulation of biological process	1	371	46	6672	0.928703	0.968667	0.390953	circRNA_2562|Chr16:63915078_63933482_+
GO:0030308	negative regulation of cell growth	biological_process	biological regulation|cellular component organization or biogenesis|cellular process|growth|negative regulation of biological process|regulation of biological process	1	371	57	6672	0.962191	0.980685	0.315506	circRNA_2034|Chr14:43420836_43461320_+
GO:0030315	T-tubule	cellular_component	cell|cell part|membrane|membrane part	2	371	70	6672	0.907812	0.960249	0.513824	circRNA_4863|Chr4:151118221_151123637_-;circRNA_0568|Chr1:225195375_225196571_+
GO:0030316	osteoclast differentiation	biological_process	cellular process|developmental process|immune system process|multicellular organismal process	2	371	16	6672	0.222389	0.807299	2.24798	circRNA_1249|Chr10:103586432_103677527_-;circRNA_4829|Chr4:131439626_131453028_-
GO:0030323	respiratory tube development	biological_process	developmental process|multicellular organismal process	1	371	5	6672	0.248846	0.807299	3.59677	circRNA_6103|Chr7:76114791_76119201_+
GO:0030324	lung development	biological_process	developmental process|multicellular organismal process	5	371	54	6672	0.179549	0.807299	1.66517	circRNA_3621|Chr2:184309074_184309661_-;circRNA_4186|Chr3:59678949_59680308_-;circRNA_0447|Chr1:200606971_200615170_-;circRNA_4829|Chr4:131439626_131453028_-;circRNA_3057|Chr18:72593000_72595275_+
GO:0030325	adrenal gland development	biological_process	developmental process|multicellular organismal process	1	371	20	6672	0.682064	0.858756	0.899191	circRNA_6157|Chr7:116072198_116158807_-
GO:0030326	embryonic limb morphogenesis	biological_process	developmental process|multicellular organismal process	1	371	23	6672	0.732356	0.878053	0.781906	circRNA_3581|Chr2:150755405_150756431_+
GO:0030330	DNA damage response, signal transduction by p53 class mediator	biological_process	biological regulation|cellular process|regulation of biological process|response to stimulus|signaling	1	371	5	6672	0.248846	0.807299	3.59677	circRNA_4508|Chr4:3972586_3976284_+
GO:0030332	cyclin binding	molecular_function	binding	4	371	33	6672	0.108315	0.801999	2.17986	circRNA_3621|Chr2:184309074_184309661_-;circRNA_0544|Chr1:220039308_220042767_-;circRNA_0547|Chr1:220042074_220049075_-;circRNA_0543|Chr1:220039308_220040146_-
GO:0030334	regulation of cell migration	biological_process	biological regulation|cellular process|localization|locomotion|regulation of biological process	1	371	50	6672	0.943382	0.974749	0.359677	circRNA_2304|Chr15:41008529_41011344_+
GO:0030335	positive regulation of cell migration	biological_process	biological regulation|cellular process|localization|locomotion|positive regulation of biological process|regulation of biological process	6	371	140	6672	0.799	0.907577	0.770735	circRNA_6937|Chr9:78945266_78947892_-;circRNA_1147|Chr10:82752455_82752793_+;circRNA_3283|Chr19:61714402_61714542_+;circRNA_6935|Chr9:78911759_78911926_+;circRNA_3514|Chr2:113744312_113745181_+;circRNA_1029|Chr10:62751173_62767418_-
GO:0030336	negative regulation of cell migration	biological_process	biological regulation|cellular process|localization|locomotion|negative regulation of biological process|regulation of biological process	11	371	79	6672	0.00403258	0.272375	2.50408	circRNA_5266|Chr5:127620259_127635191_-;circRNA_1267|Chr10:109754906_109755050_+;circRNA_1266|Chr10:109754888_109755050_+;circRNA_3020|Chr18:63784568_63786264_+;circRNA_6046|Chr7:64125692_64131186_-;circRNA_6007|Chr7:52310713_52318397_-;circRNA_1265|Chr10:109754865_109755050_+;circRNA_1288|Chr11:10020678_10022991_+;circRNA_0647|Chr1:251455609_251485480_+;circRNA_3023|Chr18:63843748_63844188_+;cir…
GO:0030371	translation repressor activity	molecular_function	translation regulator activity	1	371	9	6672	0.402631	0.807299	1.9982	circRNA_2258|Chr15:23840157_23853169_+
GO:0030374	ligand-dependent nuclear receptor transcription coactivator activity	molecular_function	protein binding transcription factor activity	1	371	38	6672	0.886988	0.948	0.473259	circRNA_2865|Chr18:6047215_6051719_-
GO:0030424	axon	cellular_component	cell|cell part	8	371	194	6672	0.853852	0.929538	0.741601	circRNA_1547|Chr12:13717791_13718009_-;circRNA_3572|Chr2:144876416_144917472_+;circRNA_3791|Chr2:227687641_227700240_+;circRNA_1346|Chr11:34865447_34879143_+;circRNA_1288|Chr11:10020678_10022991_+;circRNA_1349|Chr11:34879058_34932316_+;circRNA_2562|Chr16:63915078_63933482_+;circRNA_4948|Chr4:180711145_180722357_-
GO:0030425	dendrite	cellular_component	cell|cell part	16	371	233	6672	0.223946	0.807299	1.23494	circRNA_4863|Chr4:151118221_151123637_-;circRNA_6219|Chr7:130522030_130524289_+;circRNA_4658|Chr4:62270233_62272586_+;circRNA_3791|Chr2:227687641_227700240_+;circRNA_6212|Chr7:129690245_129708614_-;circRNA_0591|Chr1:233578229_233581182_+;circRNA_1346|Chr11:34865447_34879143_+;circRNA_6211|Chr7:129678610_129680736_-;circRNA_2258|Chr15:23840157_23853169_+;circRNA_1231|Chr10:95327724_95328546_-;circ…
GO:0030426	growth cone	cellular_component	cell|cell part	3	371	91	6672	0.88897	0.948921	0.592873	circRNA_3572|Chr2:144876416_144917472_+;circRNA_0011|Chr1:6601452_6613874_-;circRNA_3727|Chr2:206964921_206976810_-
GO:0030478	actin cap	cellular_component	cell|cell part|organelle|organelle part	1	371	6	6672	0.290646	0.807299	2.9973	circRNA_4658|Chr4:62270233_62272586_+
GO:0030485	smooth muscle contractile fiber	cellular_component	cell|cell part|organelle|organelle part	2	371	26	6672	0.428449	0.807299	1.38337	circRNA_0649|Chr1:252537818_252539458_-;circRNA_0650|Chr1:252537894_252539495_+
GO:0030496	midbody	cellular_component	cell|cell part	3	371	78	6672	0.817081	0.913126	0.691686	circRNA_4139|Chr3:45365578_45372679_+;circRNA_4837|Chr4:140870957_140872418_+;circRNA_3899|Chr20:6883690_6884511_+
GO:0030500	regulation of bone mineralization	biological_process	biological regulation|developmental process|multicellular organismal process|regulation of biological process	1	371	10	6672	0.435893	0.807299	1.79838	circRNA_3477|Chr2:80226167_80234308_+
GO:0030505	inorganic diphosphate transport	biological_process	establishment of localization|localization	1	371	5	6672	0.248846	0.807299	3.59677	circRNA_3477|Chr2:80226167_80234308_+
GO:0030507	spectrin binding	molecular_function	binding	1	371	21	6672	0.699797	0.864628	0.856373	circRNA_0052|Chr1:20961258_20962540_-
GO:0030509	BMP signaling pathway	biological_process	biological regulation|cellular process|metabolic process|regulation of biological process|response to stimulus|signaling	4	371	35	6672	0.127381	0.807299	2.05529	circRNA_3585|Chr2:154520979_154532393_-;circRNA_6753|Chr9:18653895_18660843_+;circRNA_0758|Chr1:274628955_274647456_+;circRNA_3152|Chr19:32214551_32215127_+
GO:0030511	positive regulation of transforming growth factor beta receptor signaling pathway	biological_process	biological regulation|cellular process|positive regulation of biological process|regulation of biological process|response to stimulus|signaling	2	371	23	6672	0.368635	0.807299	1.56381	circRNA_4697|Chr4:66567829_66568912_-;circRNA_0728|Chr1:263249208_263253633_-
GO:0030512	negative regulation of transforming growth factor beta receptor signaling pathway	biological_process	biological regulation|cellular process|negative regulation of biological process|regulation of biological process|response to stimulus|signaling	2	371	23	6672	0.368635	0.807299	1.56381	circRNA_3020|Chr18:63784568_63786264_+;circRNA_3023|Chr18:63843748_63844188_+
GO:0030513	positive regulation of BMP signaling pathway	biological_process	biological regulation|cellular process|metabolic process|positive regulation of biological process|regulation of biological process|response to stimulus|signaling	2	371	28	6672	0.466633	0.807299	1.28456	circRNA_2849|Chr18:2445774_2446986_+;circRNA_3057|Chr18:72593000_72595275_+
GO:0030514	negative regulation of BMP signaling pathway	biological_process	biological regulation|cellular process|metabolic process|negative regulation of biological process|regulation of biological process|response to stimulus|signaling	2	371	11	6672	0.121747	0.807299	3.26979	circRNA_4697|Chr4:66567829_66568912_-;circRNA_6311|Chr8:24427222_24434916_+
GO:0030534	adult behavior	biological_process	multicellular organismal process	2	371	12	6672	0.140942	0.807299	2.9973	circRNA_6219|Chr7:130522030_130524289_+;circRNA_0647|Chr1:251455609_251485480_+
GO:0030618	transforming growth factor beta receptor, pathway-specific cytoplasmic mediator activity	molecular_function	NA	1	371	7	6672	0.330125	0.807299	2.56912	circRNA_3057|Chr18:72593000_72595275_+
GO:0030659	cytoplasmic vesicle membrane	cellular_component	cell|cell part|membrane|organelle|organelle part	1	371	40	6672	0.899275	0.954665	0.449596	circRNA_4948|Chr4:180711145_180722357_-
GO:0030667	secretory granule membrane	cellular_component	cell|cell part|membrane|organelle|organelle part	1	371	15	6672	0.576456	0.832613	1.19892	circRNA_4948|Chr4:180711145_180722357_-
GO:0030672	synaptic vesicle membrane	cellular_component	cell|cell part|membrane|organelle|organelle part|synapse|synapse part	1	371	26	6672	0.774711	0.894571	0.691686	circRNA_0939|Chr10:45771832_45778634_-
GO:0030673	axolemma	cellular_component	cell|cell part|membrane|membrane part	2	371	8	6672	0.0691104	0.671779	4.49596	circRNA_1288|Chr11:10020678_10022991_+;circRNA_2562|Chr16:63915078_63933482_+
GO:0030674	protein binding, bridging	molecular_function	binding	3	371	45	6672	0.460835	0.807299	1.19892	circRNA_1738|Chr13:52667988_52673721_+;circRNA_3621|Chr2:184309074_184309661_-;circRNA_2690|Chr17:29730437_29737981_-
GO:0030676	Rac guanyl-nucleotide exchange factor activity	molecular_function	binding	2	371	23	6672	0.368635	0.807299	1.56381	circRNA_2304|Chr15:41008529_41011344_+;circRNA_2411|Chr15:106417736_106434369_+
GO:0030705	cytoskeleton-dependent intracellular transport	biological_process	establishment of localization|localization	1	371	9	6672	0.402631	0.807299	1.9982	circRNA_2726|Chr17:54209230_54209739_+
GO:0030728	ovulation	biological_process	multicellular organismal process|multi-organism process|reproduction|reproductive process	1	371	9	6672	0.402631	0.807299	1.9982	circRNA_4795|Chr4:117422680_117436312_+
GO:0030742	GTP-dependent protein binding	molecular_function	binding	1	371	26	6672	0.774711	0.894571	0.691686	circRNA_3332|Chr2:24067948_24083767_+
GO:0030838	positive regulation of actin filament polymerization	biological_process	biological regulation|cellular component organization or biogenesis|cellular process|positive regulation of biological process|regulation of biological process	1	371	39	6672	0.893308	0.950626	0.461124	circRNA_4285|Chr3:104816866_104818862_+
GO:0030851	granulocyte differentiation	biological_process	cellular process|developmental process|immune system process|multicellular organismal process	1	371	14	6672	0.551462	0.825583	1.28456	circRNA_4186|Chr3:59678949_59680308_-
GO:0030855	epithelial cell differentiation	biological_process	cellular process|developmental process	2	371	34	6672	0.571473	0.832613	1.05787	circRNA_0447|Chr1:200606971_200615170_-;circRNA_2849|Chr18:2445774_2446986_+
GO:0030863	cortical cytoskeleton	cellular_component	cell|cell part|organelle	2	371	27	6672	0.447726	0.807299	1.33214	circRNA_1547|Chr12:13717791_13718009_-;circRNA_5414|Chr5:157690578_157712883_+
GO:0030864	cortical actin cytoskeleton	cellular_component	cell|cell part|organelle|organelle part	1	371	32	6672	0.840411	0.919804	0.561995	circRNA_0011|Chr1:6601452_6613874_-
GO:0030866	cortical actin cytoskeleton organization	biological_process	cellular component organization or biogenesis|cellular process	1	371	24	6672	0.74729	0.883396	0.749326	circRNA_0052|Chr1:20961258_20962540_-
GO:0030900	forebrain development	biological_process	developmental process|multicellular organismal process	2	371	58	6672	0.841323	0.919804	0.620132	circRNA_3572|Chr2:144876416_144917472_+;circRNA_4829|Chr4:131439626_131453028_-
GO:0030901	midbrain development	biological_process	developmental process|multicellular organismal process	2	371	19	6672	0.285525	0.807299	1.89303	circRNA_0447|Chr1:200606971_200615170_-;circRNA_3152|Chr19:32214551_32215127_+
GO:0030902	hindbrain development	biological_process	developmental process|multicellular organismal process	1	371	15	6672	0.576456	0.832613	1.19892	circRNA_3152|Chr19:32214551_32215127_+
GO:0030903	notochord development	biological_process	developmental process|multicellular organismal process	1	371	12	6672	0.496977	0.810254	1.49865	circRNA_0375|Chr1:177651557_177654228_+
GO:0030904	retromer complex	cellular_component	cell|cell part|macromolecular complex|membrane|membrane part	1	371	28	6672	0.799163	0.907577	0.64228	circRNA_3686|Chr2:195768840_195795666_-
GO:0030916	otic vesicle formation	biological_process	developmental process|multicellular organismal process	1	371	5	6672	0.248846	0.807299	3.59677	circRNA_0447|Chr1:200606971_200615170_-
GO:0030957	Tat protein binding	molecular_function	binding	1	371	5	6672	0.248846	0.807299	3.59677	circRNA_1547|Chr12:13717791_13718009_-
GO:0030968	endoplasmic reticulum unfolded protein response	biological_process	biological regulation|cellular process|regulation of biological process|response to stimulus|signaling	1	371	11	6672	0.467307	0.807299	1.63489	circRNA_4669|Chr4:64894605_64899587_-
GO:0030971	receptor tyrosine kinase binding	molecular_function	binding	2	371	23	6672	0.368635	0.807299	1.56381	circRNA_2562|Chr16:63915078_63933482_+;circRNA_5662|Chr6:60609626_60618957_+
GO:0030983	mismatched DNA binding	molecular_function	binding	1	371	6	6672	0.290646	0.807299	2.9973	circRNA_5526|Chr6:11219826_11221789_-
GO:0031012	extracellular matrix	cellular_component	extracellular region|extracellular region part	17	371	115	6672	0.000185106	0.12082	2.65848	circRNA_6828|Chr9:52047552_52048745_+;circRNA_5266|Chr5:127620259_127635191_-;circRNA_4051|Chr3:6464953_6472752_+;circRNA_6937|Chr9:78945266_78947892_-;circRNA_3914|Chr20:12666784_12667523_+;circRNA_6830|Chr9:52048089_52048881_+;circRNA_5945|Chr7:23546534_23546690_+;circRNA_4330|Chr3:117726599_117728604_-;circRNA_1147|Chr10:82752455_82752793_+;circRNA_6827|Chr9:52047552_52047844_+;circRNA_6825|Ch…
GO:0031013	troponin I binding	molecular_function	binding	1	371	5	6672	0.248846	0.807299	3.59677	circRNA_1738|Chr13:52667988_52673721_+
GO:0031016	pancreas development	biological_process	developmental process|multicellular organismal process	5	371	22	6672	0.00620864	0.293409	4.08723	circRNA_0544|Chr1:220039308_220042767_-;circRNA_0547|Chr1:220042074_220049075_-;circRNA_2849|Chr18:2445774_2446986_+;circRNA_0543|Chr1:220039308_220040146_-;circRNA_3057|Chr18:72593000_72595275_+
GO:0031018	endocrine pancreas development	biological_process	developmental process|multicellular organismal process	1	371	9	6672	0.402631	0.807299	1.9982	circRNA_3670|Chr2:189226433_189230967_-
GO:0031032	actomyosin structure organization	biological_process	cellular component organization or biogenesis|cellular process	1	371	24	6672	0.74729	0.883396	0.749326	circRNA_0052|Chr1:20961258_20962540_-
GO:0031045	dense core granule	cellular_component	cell|cell part|organelle	1	371	10	6672	0.435893	0.807299	1.79838	circRNA_0594|Chr1:235750193_235761819_-
GO:0031056	regulation of histone modification	biological_process	biological regulation|cellular component organization or biogenesis|cellular process|metabolic process|regulation of biological process	1	371	5	6672	0.248846	0.807299	3.59677	circRNA_2472|Chr16:8396763_8400882_+
GO:0031065	positive regulation of histone deacetylation	biological_process	biological regulation|cellular component organization or biogenesis|cellular process|metabolic process|positive regulation of biological process|regulation of biological process	2	371	7	6672	0.0537688	0.612665	5.13824	circRNA_3458|Chr2:57539193_57544062_-;circRNA_5617|Chr6:41822551_41830656_-
GO:0031069	hair follicle morphogenesis	biological_process	developmental process|multicellular organismal process	1	371	12	6672	0.496977	0.810254	1.49865	circRNA_0447|Chr1:200606971_200615170_-
GO:0031072	heat shock protein binding	molecular_function	binding	1	371	18	6672	0.643406	0.848633	0.999102	circRNA_3885|Chr20:4896892_4921063_-
GO:0031083	BLOC-1 complex	cellular_component	cell|cell part|macromolecular complex	1	371	8	6672	0.367413	0.807299	2.24798	circRNA_0939|Chr10:45771832_45778634_-
GO:0031090	organelle membrane	cellular_component	membrane|organelle|organelle part	3	371	14	6672	0.0392779	0.559784	3.85368	circRNA_1993|Chr14:22619364_22655924_+;circRNA_5223|Chr5:115146569_115199307_-;circRNA_0734|Chr1:264001511_264066989_+
GO:0031098	stress-activated protein kinase signaling cascade	biological_process	biological regulation|cellular process|regulation of biological process|response to stimulus|signaling	1	371	75	6672	0.98664	0.993909	0.239784	circRNA_7179|ChrX:109996163_110063748_+
GO:0031100	animal organ regeneration	biological_process	developmental process|multicellular organismal process	4	371	28	6672	0.0670535	0.671779	2.56912	circRNA_2766|Chr17:76245627_76265943_-;circRNA_5617|Chr6:41822551_41830656_-;circRNA_4448|Chr3:156690910_156699465_+;circRNA_2768|Chr17:76260636_76265943_-
GO:0031115	negative regulation of microtubule polymerization	biological_process	biological regulation|cellular component organization or biogenesis|cellular process|negative regulation of biological process|regulation of biological process	3	371	16	6672	0.0556899	0.624153	3.37197	circRNA_1346|Chr11:34865447_34879143_+;circRNA_5414|Chr5:157690578_157712883_+;circRNA_1349|Chr11:34879058_34932316_+
GO:0031116	positive regulation of microtubule polymerization	biological_process	biological regulation|cellular component organization or biogenesis|cellular process|positive regulation of biological process|regulation of biological process	1	371	16	6672	0.60006	0.842385	1.12399	circRNA_6007|Chr7:52310713_52318397_-
GO:0031122	cytoplasmic microtubule organization	biological_process	cellular component organization or biogenesis|cellular process	1	371	31	6672	0.830968	0.917779	0.580123	circRNA_1188|Chr10:89036545_89074755_+
GO:0031146	SCF-dependent proteasomal ubiquitin-dependent protein catabolic process	biological_process	cellular process|metabolic process	1	371	13	6672	0.524998	0.816973	1.38337	circRNA_3621|Chr2:184309074_184309661_-
GO:0031175	neuron projection development	biological_process	cellular component organization or biogenesis|cellular process|developmental process|multicellular organismal process	4	371	108	6672	0.858974	0.931653	0.666068	circRNA_3283|Chr19:61714402_61714542_+;circRNA_5414|Chr5:157690578_157712883_+;circRNA_0647|Chr1:251455609_251485480_+;circRNA_5232|Chr5:117620103_117623151_-
GO:0031201	SNARE complex	cellular_component	cell|cell part|macromolecular complex|membrane|membrane part	1	371	13	6672	0.524998	0.816973	1.38337	circRNA_0939|Chr10:45771832_45778634_-
GO:0031209	SCAR complex	cellular_component	cell|cell part|macromolecular complex	1	371	10	6672	0.435893	0.807299	1.79838	circRNA_6894|Chr9:67242046_67257543_+
GO:0031210	phosphatidylcholine binding	molecular_function	binding	1	371	20	6672	0.682064	0.858756	0.899191	circRNA_5902|Chr6:144189453_144275272_+
GO:0031224	intrinsic component of membrane	cellular_component	membrane|membrane part	1	371	10	6672	0.435893	0.807299	1.79838	circRNA_0290|Chr1:154405931_154425509_+
GO:0031227	intrinsic component of endoplasmic reticulum membrane	cellular_component	cell|cell part|membrane|membrane part|organelle|organelle part	1	371	6	6672	0.290646	0.807299	2.9973	circRNA_5902|Chr6:144189453_144275272_+
GO:0031234	extrinsic component of cytoplasmic side of plasma membrane	cellular_component	cell|cell part|membrane|membrane part	2	371	65	6672	0.88408	0.946865	0.553349	circRNA_5902|Chr6:144189453_144275272_+;circRNA_2411|Chr15:106417736_106434369_+
GO:0031252	cell leading edge	cellular_component	cell|cell part	1	371	55	6672	0.957566	0.980024	0.326979	circRNA_0617|Chr1:243014234_243018525_+
GO:0031256	leading edge membrane	cellular_component	cell|cell part|membrane|membrane part	1	371	11	6672	0.467307	0.807299	1.63489	circRNA_0617|Chr1:243014234_243018525_+
GO:0031267	small GTPase binding	molecular_function	binding	3	371	58	6672	0.63365	0.848633	0.930198	circRNA_1064|Chr10:67497682_67503048_+;circRNA_6781|Chr9:30155195_30155808_+;circRNA_6987|Chr9:96746440_96751314_+
GO:0031298	replication fork protection complex	cellular_component	cell|cell part|macromolecular complex|membrane-enclosed lumen|organelle|organelle part	2	371	5	6672	0.0275678	0.495978	7.19353	circRNA_2259|Chr15:24024429_24032402_-;circRNA_4448|Chr3:156690910_156699465_+
GO:0031301	integral component of organelle membrane	cellular_component	membrane|membrane part|organelle|organelle part	1	371	6	6672	0.290646	0.807299	2.9973	circRNA_6066|Chr7:71069214_71077102_+
GO:0031338	regulation of vesicle fusion	biological_process	biological regulation|cellular component organization or biogenesis|cellular process|establishment of localization|localization|regulation of biological process	4	371	42	6672	0.203391	0.807299	1.71275	circRNA_4098|Chr3:21782079_21792112_+;circRNA_6811|Chr9:46123188_46125984_-;circRNA_4094|Chr3:21721366_21736929_+;circRNA_1923|Chr14:2924636_2924865_+
GO:0031340	positive regulation of vesicle fusion	biological_process	biological regulation|cellular component organization or biogenesis|cellular process|establishment of localization|localization|positive regulation of biological process|regulation of biological process	1	371	7	6672	0.330125	0.807299	2.56912	circRNA_2726|Chr17:54209230_54209739_+
GO:0031369	translation initiation factor binding	molecular_function	binding	3	371	13	6672	0.0321534	0.531828	4.15011	circRNA_4863|Chr4:151118221_151123637_-;circRNA_0432|Chr1:197981834_197983786_-;circRNA_0433|Chr1:197981834_197983858_-
GO:0031386	protein tag	molecular_function	NA	2	371	8	6672	0.0691104	0.671779	4.49596	circRNA_6291|Chr8:21663861_21664122_+;circRNA_4859|Chr4:148256642_148258399_+
GO:0031398	positive regulation of protein ubiquitination	biological_process	biological regulation|cellular process|metabolic process|positive regulation of biological process|regulation of biological process	2	371	22	6672	0.348137	0.807299	1.63489	circRNA_3621|Chr2:184309074_184309661_-;circRNA_4508|Chr4:3972586_3976284_+
GO:0031410	cytoplasmic vesicle	cellular_component	cell|cell part|organelle	9	371	162	6672	0.550812	0.825583	0.999102	circRNA_3844|Chr2:256682926_256683075_+;circRNA_3842|Chr2:256669855_256683075_+;circRNA_3791|Chr2:227687641_227700240_+;circRNA_3283|Chr19:61714402_61714542_+;circRNA_3373|Chr2:30564530_30566431_-;circRNA_2847|Chr18:2018381_2018553_-;circRNA_6919|Chr9:71920586_71955010_+;circRNA_6917|Chr9:71915420_71927987_+;circRNA_5077|Chr5:58870933_58873011_+
GO:0031434	mitogen-activated protein kinase kinase binding	molecular_function	binding	1	371	49	6672	0.940022	0.974468	0.367017	circRNA_0447|Chr1:200606971_200615170_-
GO:0031440	regulation of mRNA 3'-end processing	biological_process	biological regulation|cellular process|metabolic process|regulation of biological process	2	371	8	6672	0.0691104	0.671779	4.49596	circRNA_5840|Chr6:129621583_129636485_+;circRNA_5844|Chr6:129641475_129660096_+
GO:0031462	Cul2-RING ubiquitin ligase complex	cellular_component	cell|cell part|macromolecular complex	1	371	9	6672	0.402631	0.807299	1.9982	circRNA_6407|Chr8:64171150_64184113_-
GO:0031463	Cul3-RING ubiquitin ligase complex	cellular_component	cell|cell part|macromolecular complex	2	371	21	6672	0.327422	0.807299	1.71275	circRNA_6407|Chr8:64171150_64184113_-;circRNA_5302|Chr5:135354650_135359472_+
GO:0031464	Cul4A-RING E3 ubiquitin ligase complex	cellular_component	cell|cell part|macromolecular complex	1	371	19	6672	0.663288	0.852917	0.946517	circRNA_6407|Chr8:64171150_64184113_-
GO:0031490	chromatin DNA binding	molecular_function	binding	6	371	44	6672	0.0334864	0.545085	2.45234	circRNA_2493|Chr16:19805426_19805902_+;circRNA_6103|Chr7:76114791_76119201_+;circRNA_3944|Chr20:22822066_22856689_-;circRNA_4448|Chr3:156690910_156699465_+;circRNA_7065|ChrX:4819220_4832241_-;circRNA_1063|Chr10:67363508_67364610_+
GO:0031491	nucleosome binding	molecular_function	binding	1	371	13	6672	0.524998	0.816973	1.38337	circRNA_0933|Chr10:43227922_43229953_+
GO:0031514	motile cilium	cellular_component	cell|cell part|organelle	2	371	27	6672	0.447726	0.807299	1.33214	circRNA_4795|Chr4:117422680_117436312_+;circRNA_0857|Chr10:13944932_13945211_+
GO:0031519	PcG protein complex	cellular_component	cell|cell part|macromolecular complex|organelle|organelle part	2	371	16	6672	0.222389	0.807299	2.24798	circRNA_7114|ChrX:35344847_35352097_-;circRNA_3675|Chr2:189383399_189395748_-
GO:0031526	brush border membrane	cellular_component	cell|cell part|membrane|membrane part	1	371	11	6672	0.467307	0.807299	1.63489	circRNA_5564|Chr6:25409775_25417047_-
GO:0031527	filopodium membrane	cellular_component	cell|cell part|membrane|membrane part	1	371	30	6672	0.820968	0.913126	0.599461	circRNA_0011|Chr1:6601452_6613874_-
GO:0031529	ruffle organization	biological_process	cellular component organization or biogenesis|cellular process	1	371	15	6672	0.576456	0.832613	1.19892	circRNA_5617|Chr6:41822551_41830656_-
GO:0031532	actin cytoskeleton reorganization	biological_process	cellular component organization or biogenesis|cellular process	2	371	65	6672	0.88408	0.946865	0.553349	circRNA_6781|Chr9:30155195_30155808_+;circRNA_5617|Chr6:41822551_41830656_-
GO:0031573	intra-S DNA damage checkpoint	biological_process	biological regulation|cellular process|negative regulation of biological process|regulation of biological process|response to stimulus	1	371	7	6672	0.330125	0.807299	2.56912	circRNA_5526|Chr6:11219826_11221789_-
GO:0031589	cell-substrate adhesion	biological_process	biological adhesion	1	371	11	6672	0.467307	0.807299	1.63489	circRNA_3283|Chr19:61714402_61714542_+
GO:0031594	neuromuscular junction	cellular_component	synapse	6	371	50	6672	0.0572532	0.634737	2.15806	circRNA_5368|Chr5:147482283_147483432_+;circRNA_6953|Chr9:82558343_82558587_+;circRNA_3283|Chr19:61714402_61714542_+;circRNA_2562|Chr16:63915078_63933482_+;circRNA_0011|Chr1:6601452_6613874_-;circRNA_6952|Chr9:82557123_82558587_+
GO:0031623	receptor internalization	biological_process	cellular process|establishment of localization|localization|metabolic process	2	371	34	6672	0.571473	0.832613	1.05787	circRNA_0290|Chr1:154405931_154425509_+;circRNA_3283|Chr19:61714402_61714542_+
GO:0031624	ubiquitin conjugating enzyme binding	molecular_function	binding	4	371	33	6672	0.108315	0.801999	2.17986	circRNA_2943|Chr18:31445709_31446694_-;circRNA_6407|Chr8:64171150_64184113_-;circRNA_0073|Chr1:28362167_28375861_+;circRNA_2284|Chr15:37190896_37218085_+
GO:0031625	ubiquitin protein ligase binding	molecular_function	binding	8	371	184	6672	0.811376	0.912353	0.781906	circRNA_3621|Chr2:184309074_184309661_-;circRNA_6407|Chr8:64171150_64184113_-;circRNA_3885|Chr20:4896892_4921063_-;circRNA_0716|Chr1:259479327_259489683_-;circRNA_6894|Chr9:67242046_67257543_+;circRNA_4859|Chr4:148256642_148258399_+;circRNA_2278|Chr15:36934315_36940208_+;circRNA_3057|Chr18:72593000_72595275_+
GO:0031642	negative regulation of myelination	biological_process	biological regulation|cellular process|developmental process|multicellular organismal process|negative regulation of biological process|regulation of biological process	1	371	6	6672	0.290646	0.807299	2.9973	circRNA_0647|Chr1:251455609_251485480_+
GO:0031643	positive regulation of myelination	biological_process	biological regulation|cellular process|developmental process|multicellular organismal process|positive regulation of biological process|regulation of biological process	1	371	7	6672	0.330125	0.807299	2.56912	circRNA_2562|Chr16:63915078_63933482_+
GO:0031647	regulation of protein stability	biological_process	biological regulation	2	371	48	6672	0.755547	0.888553	0.749326	circRNA_6107|Chr7:76837537_76845975_-;circRNA_0647|Chr1:251455609_251485480_+
GO:0031648	protein destabilization	biological_process	biological regulation	1	371	28	6672	0.799163	0.907577	0.64228	circRNA_3621|Chr2:184309074_184309661_-
GO:0031659	positive regulation of cyclin-dependent protein serine/threonine kinase activity involved in G1/S transition of mitotic cell cycle	biological_process	NA	1	371	6	6672	0.290646	0.807299	2.9973	circRNA_0857|Chr10:13944932_13945211_+
GO:0031667	response to nutrient levels	biological_process	response to stimulus	4	371	84	6672	0.694974	0.864628	0.856373	circRNA_0225|Chr1:127025462_127025957_+;circRNA_1147|Chr10:82752455_82752793_+;circRNA_3283|Chr19:61714402_61714542_+;circRNA_0716|Chr1:259479327_259489683_-
GO:0031672	A band	cellular_component	cell|cell part|organelle|organelle part	1	371	15	6672	0.576456	0.832613	1.19892	circRNA_6001|Chr7:51425330_51432888_-
GO:0031683	G-protein beta/gamma-subunit complex binding	molecular_function	binding	1	371	8	6672	0.367413	0.807299	2.24798	circRNA_0591|Chr1:233578229_233581182_+
GO:0031826	type 2A serotonin receptor binding	molecular_function	binding	1	371	5	6672	0.248846	0.807299	3.59677	circRNA_0591|Chr1:233578229_233581182_+
GO:0031901	early endosome membrane	cellular_component	cell|cell part|membrane|organelle|organelle part	7	371	45	6672	0.0112943	0.367693	2.79748	circRNA_4403|Chr3:145092634_145129362_+;circRNA_4402|Chr3:145092634_145098350_+;circRNA_3020|Chr18:63784568_63786264_+;circRNA_6919|Chr9:71920586_71955010_+;circRNA_6917|Chr9:71915420_71927987_+;circRNA_3023|Chr18:63843748_63844188_+;circRNA_3686|Chr2:195768840_195795666_-
GO:0031902	late endosome membrane	cellular_component	cell|cell part|membrane|organelle|organelle part	3	371	35	6672	0.308184	0.807299	1.54147	circRNA_4837|Chr4:140870957_140872418_+;circRNA_3876|Chr20:4095939_4118506_+;circRNA_3514|Chr2:113744312_113745181_+
GO:0031960	response to corticosteroid	biological_process	response to stimulus	1	371	20	6672	0.682064	0.858756	0.899191	circRNA_1147|Chr10:82752455_82752793_+
GO:0031965	nuclear membrane	cellular_component	cell|cell part|membrane|organelle|organelle part	7	371	122	6672	0.522118	0.816973	1.03186	circRNA_2299|Chr15:38661026_38709984_-;circRNA_0591|Chr1:233578229_233581182_+;circRNA_2985|Chr18:51805551_51807909_+;circRNA_4722|Chr4:80080131_80090153_-;circRNA_5617|Chr6:41822551_41830656_-;circRNA_1551|Chr12:13879069_13884323_+;circRNA_2849|Chr18:2445774_2446986_+
GO:0031982	vesicle	cellular_component	organelle	5	371	105	6672	0.702218	0.867098	0.856373	circRNA_0290|Chr1:154405931_154425509_+;circRNA_3885|Chr20:4896892_4921063_-;circRNA_0568|Chr1:225195375_225196571_+;circRNA_2726|Chr17:54209230_54209739_+;circRNA_3514|Chr2:113744312_113745181_+
GO:0031985	Golgi cisterna	cellular_component	cell|cell part|organelle|organelle part	1	371	10	6672	0.435893	0.807299	1.79838	circRNA_3514|Chr2:113744312_113745181_+
GO:0032006	regulation of TOR signaling	biological_process	biological regulation|cellular process|regulation of biological process|response to stimulus|signaling	1	371	19	6672	0.663288	0.852917	0.946517	circRNA_6772|Chr9:26636334_26669699_-
GO:0032007	negative regulation of TOR signaling	biological_process	biological regulation|cellular process|negative regulation of biological process|regulation of biological process|response to stimulus|signaling	1	371	32	6672	0.840411	0.919804	0.561995	circRNA_6742|Chr9:16036525_16039832_+
GO:0032012	regulation of ARF protein signal transduction	biological_process	biological regulation|cellular process|regulation of biological process|response to stimulus|signaling	3	371	53	6672	0.571873	0.832613	1.01795	circRNA_1064|Chr10:67497682_67503048_+;circRNA_6781|Chr9:30155195_30155808_+;circRNA_6987|Chr9:96746440_96751314_+
GO:0032027	myosin light chain binding	molecular_function	binding	1	371	5	6672	0.248846	0.807299	3.59677	circRNA_1093|Chr10:72203091_72212546_+
GO:0032039	integrator complex	cellular_component	cell|cell part|macromolecular complex|membrane-enclosed lumen|organelle|organelle part	1	371	9	6672	0.402631	0.807299	1.9982	circRNA_3458|Chr2:57539193_57544062_-
GO:0032040	small-subunit processome	cellular_component	cell|cell part|macromolecular complex	1	371	11	6672	0.467307	0.807299	1.63489	circRNA_5775|Chr6:108797786_108802113_+
GO:0032045	guanyl-nucleotide exchange factor complex	cellular_component	cell|cell part|macromolecular complex	1	371	20	6672	0.682064	0.858756	0.899191	circRNA_3733|Chr2:208198684_208203924_-
GO:0032050	clathrin heavy chain binding	molecular_function	binding	1	371	11	6672	0.467307	0.807299	1.63489	circRNA_0290|Chr1:154405931_154425509_+
GO:0032055	negative regulation of translation in response to stress	biological_process	biological regulation|cellular process|metabolic process|negative regulation of biological process|regulation of biological process|response to stimulus	3	371	6	6672	0.00300709	0.256981	8.99191	circRNA_0544|Chr1:220039308_220042767_-;circRNA_0547|Chr1:220042074_220049075_-;circRNA_0543|Chr1:220039308_220040146_-
GO:0032088	negative regulation of NF-kappaB transcription factor activity	biological_process	biological regulation|cellular process|metabolic process|negative regulation of biological process|regulation of biological process	1	371	51	6672	0.946554	0.974936	0.352624	circRNA_6772|Chr9:26636334_26669699_-
GO:0032091	negative regulation of protein binding	biological_process	biological regulation	1	371	28	6672	0.799163	0.907577	0.64228	circRNA_1547|Chr12:13717791_13718009_-
GO:0032092	positive regulation of protein binding	biological_process	biological regulation	4	371	66	6672	0.504244	0.816973	1.08993	circRNA_4697|Chr4:66567829_66568912_-;circRNA_6169|Chr7:119987740_119990307_-;circRNA_4658|Chr4:62270233_62272586_+;circRNA_0857|Chr10:13944932_13945211_+
GO:0032137	guanine/thymine mispair binding	molecular_function	binding	1	371	6	6672	0.290646	0.807299	2.9973	circRNA_5526|Chr6:11219826_11221789_-
GO:0032147	activation of protein kinase activity	biological_process	biological regulation|cellular process|metabolic process|positive regulation of biological process|regulation of biological process	1	371	88	6672	0.993709	0.996518	0.204362	circRNA_7179|ChrX:109996163_110063748_+
GO:0032148	activation of protein kinase B activity	biological_process	biological regulation|cellular process|metabolic process|positive regulation of biological process|regulation of biological process	1	371	12	6672	0.496977	0.810254	1.49865	circRNA_2562|Chr16:63915078_63933482_+
GO:0032153	cell division site	cellular_component	cell|cell part	1	371	7	6672	0.330125	0.807299	2.56912	circRNA_1255|Chr10:106264856_106265494_+
GO:0032204	regulation of telomere maintenance	biological_process	biological regulation|cellular component organization or biogenesis|cellular process|metabolic process|regulation of biological process	1	371	9	6672	0.402631	0.807299	1.9982	circRNA_5778|Chr6:108862383_108883917_+
GO:0032228	regulation of synaptic transmission, GABAergic	biological_process	biological regulation|cellular process|regulation of biological process|signaling	1	371	17	6672	0.622353	0.847573	1.05787	circRNA_0647|Chr1:251455609_251485480_+
GO:0032266	phosphatidylinositol-3-phosphate binding	molecular_function	binding	2	371	28	6672	0.466633	0.807299	1.28456	circRNA_0933|Chr10:43227922_43229953_+;circRNA_3686|Chr2:195768840_195795666_-
GO:0032288	myelin assembly	biological_process	cellular component organization or biogenesis|cellular process|developmental process|multicellular organismal process	2	371	9	6672	0.0856728	0.732146	3.99641	circRNA_6919|Chr9:71920586_71955010_+;circRNA_6917|Chr9:71915420_71927987_+
GO:0032300	mismatch repair complex	cellular_component	cell|cell part|macromolecular complex	1	371	6	6672	0.290646	0.807299	2.9973	circRNA_5526|Chr6:11219826_11221789_-
GO:0032332	positive regulation of chondrocyte differentiation	biological_process	biological regulation|cellular process|developmental process|multicellular organismal process|positive regulation of biological process|regulation of biological process	1	371	5	6672	0.248846	0.807299	3.59677	circRNA_6753|Chr9:18653895_18660843_+
GO:0032355	response to estradiol	biological_process	response to stimulus	2	371	87	6672	0.958713	0.980685	0.413421	circRNA_1147|Chr10:82752455_82752793_+;circRNA_0647|Chr1:251455609_251485480_+
GO:0032410	negative regulation of transporter activity	biological_process	biological regulation|establishment of localization|localization|negative regulation of biological process|regulation of biological process	1	371	8	6672	0.367413	0.807299	2.24798	circRNA_3216|Chr19:39543248_39545672_+
GO:0032418	lysosome localization	biological_process	localization	1	371	6	6672	0.290646	0.807299	2.9973	circRNA_4837|Chr4:140870957_140872418_+
GO:0032420	stereocilium	cellular_component	cell|cell part|organelle|organelle part	1	371	17	6672	0.622353	0.847573	1.05787	circRNA_5662|Chr6:60609626_60618957_+
GO:0032433	filopodium tip	cellular_component	cell|cell part	1	371	16	6672	0.60006	0.842385	1.12399	circRNA_6894|Chr9:67242046_67257543_+
GO:0032436	positive regulation of proteasomal ubiquitin-dependent protein catabolic process	biological_process	biological regulation|cellular process|metabolic process|positive regulation of biological process|regulation of biological process	4	371	45	6672	0.239337	0.807299	1.59856	circRNA_2943|Chr18:31445709_31446694_-;circRNA_6407|Chr8:64171150_64184113_-;circRNA_0073|Chr1:28362167_28375861_+;circRNA_1270|Chr10:110157631_110164041_-
GO:0032438	melanosome organization	biological_process	cellular component organization or biogenesis|cellular process	1	371	19	6672	0.663288	0.852917	0.946517	circRNA_3332|Chr2:24067948_24083767_+
GO:0032444	activin responsive factor complex	cellular_component	cell|cell part|macromolecular complex|organelle|organelle part	1	371	16	6672	0.60006	0.842385	1.12399	circRNA_3057|Chr18:72593000_72595275_+
GO:0032452	histone demethylase activity	molecular_function	catalytic activity	1	371	20	6672	0.682064	0.858756	0.899191	circRNA_5163|Chr5:90817794_90827570_+
GO:0032454	histone demethylase activity (H3-K9 specific)	molecular_function	catalytic activity	2	371	33	6672	0.555074	0.827968	1.08993	circRNA_5163|Chr5:90817794_90827570_+;circRNA_3944|Chr20:22822066_22856689_-
GO:0032465	regulation of cytokinesis	biological_process	biological regulation|cellular process|regulation of biological process	1	371	31	6672	0.830968	0.917779	0.580123	circRNA_1093|Chr10:72203091_72212546_+
GO:0032467	positive regulation of cytokinesis	biological_process	biological regulation|cellular process|positive regulation of biological process|regulation of biological process	2	371	26	6672	0.428449	0.807299	1.38337	circRNA_4139|Chr3:45365578_45372679_+;circRNA_5003|Chr5:8794167_8810643_-
GO:0032496	response to lipopolysaccharide	biological_process	multi-organism process|response to stimulus	3	371	63	6672	0.688968	0.862156	0.856373	circRNA_0447|Chr1:200606971_200615170_-;circRNA_4829|Chr4:131439626_131453028_-;circRNA_3670|Chr2:189226433_189230967_-
GO:0032502	developmental process	biological_process	NA	2	371	6	6672	0.0398481	0.559784	5.99461	circRNA_2410|Chr15:105687771_105688392_+;circRNA_3581|Chr2:150755405_150756431_+
GO:0032525	somite rostral/caudal axis specification	biological_process	developmental process|multicellular organismal process	1	371	18	6672	0.643406	0.848633	0.999102	circRNA_7065|ChrX:4819220_4832241_-
GO:0032526	response to retinoic acid	biological_process	response to stimulus	3	371	32	6672	0.261888	0.807299	1.68598	circRNA_4413|Chr3:148837814_148842440_+;circRNA_1063|Chr10:67363508_67364610_+;circRNA_4416|Chr3:148837814_148862118_+
GO:0032534	regulation of microvillus assembly	biological_process	biological regulation|cellular component organization or biogenesis|cellular process|regulation of biological process	1	371	8	6672	0.367413	0.807299	2.24798	circRNA_3514|Chr2:113744312_113745181_+
GO:0032570	response to progesterone	biological_process	response to stimulus	1	371	17	6672	0.622353	0.847573	1.05787	circRNA_2562|Chr16:63915078_63933482_+
GO:0032580	Golgi cisterna membrane	cellular_component	cell|cell part|membrane|organelle|organelle part	2	371	42	6672	0.686781	0.860995	0.856373	circRNA_0225|Chr1:127025462_127025957_+;circRNA_2887|Chr18:15480332_15494701_+
GO:0032587	ruffle membrane	cellular_component	cell|cell part|membrane|membrane part	3	371	57	6672	0.621804	0.847573	0.946517	circRNA_3283|Chr19:61714402_61714542_+;circRNA_2439|Chr16:2354385_2354582_-;circRNA_2304|Chr15:41008529_41011344_+
GO:0032588	trans-Golgi network membrane	cellular_component	cell|cell part|membrane|organelle|organelle part	1	371	13	6672	0.524998	0.816973	1.38337	circRNA_3620|Chr2:183555214_183558410_-
GO:0032590	dendrite membrane	cellular_component	cell|cell part|membrane|membrane part	2	371	12	6672	0.140942	0.807299	2.9973	circRNA_5986|Chr7:41167312_41167751_+;circRNA_5987|Chr7:41167312_41178782_+
GO:0032593	insulin-responsive compartment	cellular_component	cell|cell part|organelle	2	371	24	6672	0.388875	0.807299	1.49865	circRNA_6919|Chr9:71920586_71955010_+;circRNA_6917|Chr9:71915420_71927987_+
GO:0032635	interleukin-6 production	biological_process	multicellular organismal process	1	371	24	6672	0.74729	0.883396	0.749326	circRNA_3663|Chr2:188308301_188309036_+
GO:0032755	positive regulation of interleukin-6 production	biological_process	biological regulation|multicellular organismal process|positive regulation of biological process|regulation of biological process	1	371	7	6672	0.330125	0.807299	2.56912	circRNA_3670|Chr2:189226433_189230967_-
GO:0032780	negative regulation of ATPase activity	biological_process	biological regulation	1	371	6	6672	0.290646	0.807299	2.9973	circRNA_1738|Chr13:52667988_52673721_+
GO:0032781	positive regulation of ATPase activity	biological_process	biological regulation	1	371	12	6672	0.496977	0.810254	1.49865	circRNA_1738|Chr13:52667988_52673721_+
GO:0032783	ELL-EAF complex	cellular_component	cell|cell part|macromolecular complex|membrane-enclosed lumen|organelle|organelle part	2	371	9	6672	0.0856728	0.732146	3.99641	circRNA_1949|Chr14:7291691_7293326_-;circRNA_0921|Chr10:38712831_38720071_+
GO:0032808	lacrimal gland development	biological_process	developmental process|multicellular organismal process	1	371	5	6672	0.248846	0.807299	3.59677	circRNA_0447|Chr1:200606971_200615170_-
GO:0032809	neuronal cell body membrane	cellular_component	cell|cell part|membrane|membrane part	3	371	8	6672	0.0077439	0.293409	6.74394	circRNA_5986|Chr7:41167312_41167751_+;circRNA_5987|Chr7:41167312_41178782_+;circRNA_3670|Chr2:189226433_189230967_-
GO:0032868	response to insulin	biological_process	response to stimulus	2	371	53	6672	0.802525	0.909883	0.678635	circRNA_0716|Chr1:259479327_259489683_-;circRNA_6658|Chr8:118616528_118620855_+
GO:0032869	cellular response to insulin stimulus	biological_process	cellular process|response to stimulus	4	371	112	6672	0.877347	0.943597	0.64228	circRNA_5617|Chr6:41822551_41830656_-;circRNA_0728|Chr1:263249208_263253633_-;circRNA_0716|Chr1:259479327_259489683_-;circRNA_0647|Chr1:251455609_251485480_+
GO:0032870	cellular response to hormone stimulus	biological_process	cellular process|response to stimulus	1	371	18	6672	0.643406	0.848633	0.999102	circRNA_6157|Chr7:116072198_116158807_-
GO:0032880	regulation of protein localization	biological_process	biological regulation|localization|regulation of biological process	4	371	65	6672	0.492151	0.810254	1.1067	circRNA_1267|Chr10:109754906_109755050_+;circRNA_1266|Chr10:109754888_109755050_+;circRNA_0290|Chr1:154405931_154425509_+;circRNA_1265|Chr10:109754865_109755050_+
GO:0032911	negative regulation of transforming growth factor beta1 production	biological_process	biological regulation|multicellular organismal process|negative regulation of biological process|regulation of biological process	1	371	9	6672	0.402631	0.807299	1.9982	circRNA_2849|Chr18:2445774_2446986_+
GO:0032922	circadian regulation of gene expression	biological_process	biological regulation|metabolic process|multicellular organismal process|regulation of biological process|rhythmic process	8	371	52	6672	0.00741616	0.293409	2.76674	circRNA_0544|Chr1:220039308_220042767_-;circRNA_3225|Chr19:42917629_42920390_-;circRNA_0547|Chr1:220042074_220049075_-;circRNA_4448|Chr3:156690910_156699465_+;circRNA_3223|Chr19:42856166_42920390_-;circRNA_1270|Chr10:110157631_110164041_-;circRNA_0543|Chr1:220039308_220040146_-;circRNA_2222|Chr15:3233141_3293913_-
GO:0032924	activin receptor signaling pathway	biological_process	biological regulation|cellular process|regulation of biological process|response to stimulus|signaling	1	371	11	6672	0.467307	0.807299	1.63489	circRNA_3057|Chr18:72593000_72595275_+
GO:0032947	protein-containing complex scaffold activity	molecular_function	binding|structural molecule activity	2	371	62	6672	0.867248	0.936171	0.580123	circRNA_1255|Chr10:106264856_106265494_+;circRNA_1315|Chr11:31974630_31979720_+
GO:0032964	collagen biosynthetic process	biological_process	metabolic process|multicellular organismal process	2	371	17	6672	0.243383	0.807299	2.11574	circRNA_4051|Chr3:6464953_6472752_+;circRNA_1147|Chr10:82752455_82752793_+
GO:0032966	negative regulation of collagen biosynthetic process	biological_process	biological regulation|metabolic process|multicellular organismal process|negative regulation of biological process|regulation of biological process	3	371	8	6672	0.0077439	0.293409	6.74394	circRNA_3733|Chr2:208198684_208203924_-;circRNA_0728|Chr1:263249208_263253633_-;circRNA_3670|Chr2:189226433_189230967_-
GO:0032982	myosin filament	cellular_component	cell|cell part|macromolecular complex|organelle|organelle part	1	371	26	6672	0.774711	0.894571	0.691686	circRNA_4776|Chr4:115221467_115224878_-
GO:0032991	protein-containing complex	cellular_component	NA	11	371	448	6672	0.999665	0.999665	0.441567	circRNA_3745|Chr2:210808354_210822401_-;circRNA_3744|Chr2:210806416_210806638_+;circRNA_3621|Chr2:184309074_184309661_-;circRNA_1547|Chr12:13717791_13718009_-;circRNA_4863|Chr4:151118221_151123637_-;circRNA_0591|Chr1:233578229_233581182_+;circRNA_0038|Chr1:15545013_15551204_+;circRNA_7047|Chr9:119309035_119311107_-;circRNA_0959|Chr10:48165219_48200848_-;circRNA_6658|Chr8:118616528_118620855_+;cir…
GO:0032993	protein-DNA complex	cellular_component	macromolecular complex	3	371	34	6672	0.292687	0.807299	1.58681	circRNA_4186|Chr3:59678949_59680308_-;circRNA_4448|Chr3:156690910_156699465_+;circRNA_1063|Chr10:67363508_67364610_+
GO:0033017	sarcoplasmic reticulum membrane	cellular_component	cell|cell part|membrane|membrane part|organelle|organelle part	1	371	30	6672	0.820968	0.913126	0.599461	circRNA_4948|Chr4:180711145_180722357_-
GO:0033081	regulation of T cell differentiation in thymus	biological_process	biological adhesion|biological regulation|cellular process|developmental process|immune system process|multicellular organismal process|regulation of biological process	1	371	9	6672	0.402631	0.807299	1.9982	circRNA_2493|Chr16:19805426_19805902_+
GO:0033120	positive regulation of RNA splicing	biological_process	biological regulation|cellular process|metabolic process|positive regulation of biological process|regulation of biological process	2	371	18	6672	0.264453	0.807299	1.9982	circRNA_1346|Chr11:34865447_34879143_+;circRNA_1349|Chr11:34879058_34932316_+
GO:0033129	positive regulation of histone phosphorylation	biological_process	biological regulation|cellular component organization or biogenesis|cellular process|metabolic process|positive regulation of biological process|regulation of biological process	1	371	10	6672	0.435893	0.807299	1.79838	circRNA_5806|Chr6:124625936_124680274_-
GO:0033138	positive regulation of peptidyl-serine phosphorylation	biological_process	biological regulation|cellular process|metabolic process|positive regulation of biological process|regulation of biological process	1	371	53	6672	0.952376	0.977151	0.339317	circRNA_5232|Chr5:117620103_117623151_-
GO:0033148	positive regulation of intracellular estrogen receptor signaling pathway	biological_process	biological regulation|cellular process|positive regulation of biological process|regulation of biological process|response to stimulus|signaling	1	371	6	6672	0.290646	0.807299	2.9973	circRNA_6243|Chr7:140533891_140536242_-
GO:0033152	immunoglobulin V(D)J recombination	biological_process	cellular process|developmental process|immune system process|metabolic process|multicellular organismal process	1	371	9	6672	0.402631	0.807299	1.9982	circRNA_4829|Chr4:131439626_131453028_-
GO:0033160	positive regulation of protein import into nucleus, translocation	biological_process	biological regulation|establishment of localization|localization|positive regulation of biological process|regulation of biological process	1	371	11	6672	0.467307	0.807299	1.63489	circRNA_6107|Chr7:76837537_76845975_-
GO:0033169	histone H3-K9 demethylation	biological_process	cellular component organization or biogenesis|cellular process|metabolic process	2	371	33	6672	0.555074	0.827968	1.08993	circRNA_5163|Chr5:90817794_90827570_+;circRNA_3944|Chr20:22822066_22856689_-
GO:0033173	calcineurin-NFAT signaling cascade	biological_process	biological regulation|cellular process|regulation of biological process|response to stimulus|signaling	1	371	26	6672	0.774711	0.894571	0.691686	circRNA_3203|Chr19:38057557_38062193_+
GO:0033198	response to ATP	biological_process	response to stimulus	1	371	11	6672	0.467307	0.807299	1.63489	circRNA_0647|Chr1:251455609_251485480_+
GO:0033344	cholesterol efflux	biological_process	establishment of localization|localization	1	371	10	6672	0.435893	0.807299	1.79838	circRNA_1942|Chr14:5870915_5943886_+
GO:0033522	histone H2A ubiquitination	biological_process	cellular component organization or biogenesis|cellular process|metabolic process	1	371	6	6672	0.290646	0.807299	2.9973	circRNA_6742|Chr9:16036525_16039832_+
GO:0033554	cellular response to stress	biological_process	NA	1	371	9	6672	0.402631	0.807299	1.9982	circRNA_0038|Chr1:15545013_15551204_+
GO:0033555	multicellular organismal response to stress	biological_process	multicellular organismal process|response to stimulus	1	371	14	6672	0.551462	0.825583	1.28456	circRNA_0647|Chr1:251455609_251485480_+
GO:0033574	response to testosterone	biological_process	response to stimulus	1	371	30	6672	0.820968	0.913126	0.599461	circRNA_4829|Chr4:131439626_131453028_-
GO:0033613	activating transcription factor binding	molecular_function	binding	3	371	36	6672	0.32371	0.807299	1.49865	circRNA_0233|Chr1:128239552_128243030_-;circRNA_3087|Chr18:79813606_79815529_+;circRNA_3057|Chr18:72593000_72595275_+
GO:0033622	integrin activation	biological_process	cellular component organization or biogenesis|cellular process	2	371	7	6672	0.0537688	0.612665	5.13824	circRNA_6937|Chr9:78945266_78947892_-;circRNA_6935|Chr9:78911759_78911926_+
GO:0033627	cell adhesion mediated by integrin	biological_process	biological adhesion	2	371	13	6672	0.160722	0.807299	2.76674	circRNA_4330|Chr3:117726599_117728604_-;circRNA_3283|Chr19:61714402_61714542_+
GO:0033631	cell-cell adhesion mediated by integrin	biological_process	biological adhesion	1	371	5	6672	0.248846	0.807299	3.59677	circRNA_3283|Chr19:61714402_61714542_+
GO:0033674	positive regulation of kinase activity	biological_process	biological regulation|cellular process|metabolic process|positive regulation of biological process|regulation of biological process	2	371	39	6672	0.646824	0.849862	0.922248	circRNA_0447|Chr1:200606971_200615170_-;circRNA_3876|Chr20:4095939_4118506_+
GO:0033993	response to lipid	biological_process	response to stimulus	1	371	47	6672	0.932695	0.971537	0.382635	circRNA_0716|Chr1:259479327_259489683_-
GO:0034067	protein localization to Golgi apparatus	biological_process	localization	2	371	11	6672	0.121747	0.807299	3.26979	circRNA_5962|Chr7:29284390_29288495_+;circRNA_1270|Chr10:110157631_110164041_-
GO:0034088	maintenance of mitotic sister chromatid cohesion	biological_process	cellular component organization or biogenesis|cellular process	1	371	6	6672	0.290646	0.807299	2.9973	circRNA_3458|Chr2:57539193_57544062_-
GO:0034097	response to cytokine	biological_process	response to stimulus	6	371	26	6672	0.00252672	0.256981	4.15011	circRNA_6828|Chr9:52047552_52048745_+;circRNA_6830|Chr9:52048089_52048881_+;circRNA_5945|Chr7:23546534_23546690_+;circRNA_6827|Chr9:52047552_52047844_+;circRNA_6825|Chr9:52043678_52045132_+;circRNA_3670|Chr2:189226433_189230967_-
GO:0034113	heterotypic cell-cell adhesion	biological_process	biological adhesion	1	371	13	6672	0.524998	0.816973	1.38337	circRNA_3283|Chr19:61714402_61714542_+
GO:0034198	cellular response to amino acid starvation	biological_process	cellular process|response to stimulus	2	371	20	6672	0.306534	0.807299	1.79838	circRNA_0038|Chr1:15545013_15551204_+;circRNA_4610|Chr4:40092750_40122082_-
GO:0034205	amyloid-beta formation	biological_process	cellular process|metabolic process	2	371	10	6672	0.103274	0.787414	3.59677	circRNA_1346|Chr11:34865447_34879143_+;circRNA_1349|Chr11:34879058_34932316_+
GO:0034214	protein hexamerization	biological_process	cellular component organization or biogenesis|cellular process	1	371	6	6672	0.290646	0.807299	2.9973	circRNA_2113|Chr14:82239645_82240095_+
GO:0034315	regulation of Arp2/3 complex-mediated actin nucleation	biological_process	biological regulation|cellular component organization or biogenesis|cellular process|positive regulation of biological process|regulation of biological process	1	371	10	6672	0.435893	0.807299	1.79838	circRNA_3620|Chr2:183555214_183558410_-
GO:0034329	cell junction assembly	biological_process	cellular component organization or biogenesis|cellular process	2	371	27	6672	0.447726	0.807299	1.33214	circRNA_6103|Chr7:76114791_76119201_+;circRNA_6415|Chr8:64635064_64648503_+
GO:0034393	positive regulation of smooth muscle cell apoptotic process	biological_process	biological regulation|cellular process|positive regulation of biological process|regulation of biological process	1	371	8	6672	0.367413	0.807299	2.24798	circRNA_0758|Chr1:274628955_274647456_+
GO:0034394	protein localization to cell surface	biological_process	localization	1	371	25	6672	0.761393	0.889503	0.719353	circRNA_3850|Chr2:257937494_257945564_+
GO:0034405	response to fluid shear stress	biological_process	response to stimulus	1	371	5	6672	0.248846	0.807299	3.59677	circRNA_0857|Chr10:13944932_13945211_+
GO:0034446	substrate adhesion-dependent cell spreading	biological_process	biological adhesion|cellular component organization or biogenesis|cellular process|developmental process	4	371	49	6672	0.289243	0.807299	1.46807	circRNA_6937|Chr9:78945266_78947892_-;circRNA_6391|Chr8:60917720_60920949_-;circRNA_3509|Chr2:113189774_113198013_-;circRNA_6935|Chr9:78911759_78911926_+
GO:0034450	ubiquitin-ubiquitin ligase activity	molecular_function	catalytic activity	1	371	10	6672	0.435893	0.807299	1.79838	circRNA_6107|Chr7:76837537_76845975_-
GO:0034504	protein localization to nucleus	biological_process	localization	5	371	43	6672	0.0882887	0.75137	2.09114	circRNA_1147|Chr10:82752455_82752793_+;circRNA_3257|Chr19:54803498_54815443_+;circRNA_6919|Chr9:71920586_71955010_+;circRNA_6917|Chr9:71915420_71927987_+;circRNA_3258|Chr19:54803498_54822499_+
GO:0034505	tooth mineralization	biological_process	developmental process|multicellular organismal process	1	371	15	6672	0.576456	0.832613	1.19892	circRNA_1147|Chr10:82752455_82752793_+
GO:0034605	cellular response to heat	biological_process	cellular process|response to stimulus	1	371	31	6672	0.830968	0.917779	0.580123	circRNA_3885|Chr20:4896892_4921063_-
GO:0034613	cellular protein localization	biological_process	localization	3	371	45	6672	0.460835	0.807299	1.19892	circRNA_1255|Chr10:106264856_106265494_+;circRNA_7114|ChrX:35344847_35352097_-;circRNA_3458|Chr2:57539193_57544062_-
GO:0034620	cellular response to unfolded protein	biological_process	cellular process|response to stimulus	1	371	6	6672	0.290646	0.807299	2.9973	circRNA_3885|Chr20:4896892_4921063_-
GO:0034644	cellular response to UV	biological_process	cellular process|response to stimulus	1	371	29	6672	0.810378	0.91232	0.620132	circRNA_3621|Chr2:184309074_184309661_-
GO:0034665	integrin alpha1-beta1 complex	cellular_component	cell|cell part|macromolecular complex|membrane|membrane part	1	371	9	6672	0.402631	0.807299	1.9982	circRNA_3283|Chr19:61714402_61714542_+
GO:0034713	type I transforming growth factor beta receptor binding	molecular_function	binding	1	371	12	6672	0.496977	0.810254	1.49865	circRNA_3057|Chr18:72593000_72595275_+
GO:0034765	regulation of ion transmembrane transport	biological_process	biological regulation|establishment of localization|localization|regulation of biological process	2	371	29	6672	0.485151	0.810254	1.24026	circRNA_4863|Chr4:151118221_151123637_-;circRNA_3216|Chr19:39543248_39545672_+
GO:0034976	response to endoplasmic reticulum stress	biological_process	cellular process|response to stimulus	2	371	36	6672	0.602942	0.844119	0.999102	circRNA_4669|Chr4:64894605_64899587_-;circRNA_0038|Chr1:15545013_15551204_+
GO:0035023	regulation of Rho protein signal transduction	biological_process	biological regulation|cellular process|regulation of biological process|response to stimulus|signaling	6	371	72	6672	0.209958	0.807299	1.49865	circRNA_1267|Chr10:109754906_109755050_+;circRNA_1266|Chr10:109754888_109755050_+;circRNA_1265|Chr10:109754865_109755050_+;circRNA_1315|Chr11:31974630_31979720_+;circRNA_2304|Chr15:41008529_41011344_+;circRNA_2411|Chr15:106417736_106434369_+
GO:0035024	negative regulation of Rho protein signal transduction	biological_process	biological regulation|cellular process|negative regulation of biological process|regulation of biological process|response to stimulus|signaling	1	371	9	6672	0.402631	0.807299	1.9982	circRNA_3283|Chr19:61714402_61714542_+
GO:0035025	positive regulation of Rho protein signal transduction	biological_process	biological regulation|cellular process|positive regulation of biological process|regulation of biological process|response to stimulus|signaling	5	371	16	6672	0.00135686	0.252993	5.61995	circRNA_6828|Chr9:52047552_52048745_+;circRNA_6830|Chr9:52048089_52048881_+;circRNA_6827|Chr9:52047552_52047844_+;circRNA_6825|Chr9:52043678_52045132_+;circRNA_1288|Chr11:10020678_10022991_+
GO:0035035	histone acetyltransferase binding	molecular_function	binding	1	371	29	6672	0.810378	0.91232	0.620132	circRNA_0233|Chr1:128239552_128243030_-
GO:0035064	methylated histone binding	molecular_function	binding	4	371	58	6672	0.404631	0.807299	1.24026	circRNA_2388|Chr15:70790038_70832121_+;circRNA_2690|Chr17:29730437_29737981_-;circRNA_1063|Chr10:67363508_67364610_+;circRNA_2278|Chr15:36934315_36940208_+
GO:0035066	positive regulation of histone acetylation	biological_process	biological regulation|cellular component organization or biogenesis|cellular process|metabolic process|positive regulation of biological process|regulation of biological process	2	371	17	6672	0.243383	0.807299	2.11574	circRNA_5806|Chr6:124625936_124680274_-;circRNA_4508|Chr4:3972586_3976284_+
GO:0035091	phosphatidylinositol binding	molecular_function	binding	6	371	123	6672	0.687631	0.861534	0.87726	circRNA_5902|Chr6:144189453_144275272_+;circRNA_0102|Chr1:47030544_47032563_+;circRNA_3514|Chr2:113744312_113745181_+;circRNA_4948|Chr4:180711145_180722357_-;circRNA_3686|Chr2:195768840_195795666_-;circRNA_0357|Chr1:175200414_175218889_-
GO:0035097	histone methyltransferase complex	cellular_component	cell|cell part|macromolecular complex|membrane-enclosed lumen|organelle|organelle part	3	371	19	6672	0.085342	0.732146	2.83955	circRNA_4508|Chr4:3972586_3976284_+;circRNA_6243|Chr7:140533891_140536242_-;circRNA_7065|ChrX:4819220_4832241_-
GO:0035098	ESC/E(Z) complex	cellular_component	cell|cell part|macromolecular complex|membrane-enclosed lumen|organelle|organelle part	2	371	6	6672	0.0398481	0.559784	5.99461	circRNA_4937|Chr4:174810962_174816343_+;circRNA_1063|Chr10:67363508_67364610_+
GO:0035115	embryonic forelimb morphogenesis	biological_process	developmental process|multicellular organismal process	3	371	20	6672	0.0964449	0.778773	2.69757	circRNA_4863|Chr4:151118221_151123637_-;circRNA_3458|Chr2:57539193_57544062_-;circRNA_6753|Chr9:18653895_18660843_+
GO:0035136	forelimb morphogenesis	biological_process	developmental process|multicellular organismal process	2	371	7	6672	0.0537688	0.612665	5.13824	circRNA_4285|Chr3:104816866_104818862_+;circRNA_3458|Chr2:57539193_57544062_-
GO:0035137	hindlimb morphogenesis	biological_process	developmental process|multicellular organismal process	1	371	10	6672	0.435893	0.807299	1.79838	circRNA_4285|Chr3:104816866_104818862_+
GO:0035145	exon-exon junction complex	cellular_component	cell|cell part|macromolecular complex|organelle|organelle part	3	371	24	6672	0.145993	0.807299	2.24798	circRNA_2766|Chr17:76245627_76265943_-;circRNA_2768|Chr17:76260636_76265943_-;circRNA_2388|Chr15:70790038_70832121_+
GO:0035176	social behavior	biological_process	multi-organism process	3	371	29	6672	0.216635	0.807299	1.8604	circRNA_6219|Chr7:130522030_130524289_+;circRNA_0647|Chr1:251455609_251485480_+;circRNA_0594|Chr1:235750193_235761819_-
GO:0035198	miRNA binding	molecular_function	binding	3	371	19	6672	0.085342	0.732146	2.83955	circRNA_0544|Chr1:220039308_220042767_-;circRNA_0547|Chr1:220042074_220049075_-;circRNA_0543|Chr1:220039308_220040146_-
GO:0035253	ciliary rootlet	cellular_component	cell|cell part|organelle|organelle part	1	371	11	6672	0.467307	0.807299	1.63489	circRNA_2726|Chr17:54209230_54209739_+
GO:0035254	glutamate receptor binding	molecular_function	binding	2	371	5	6672	0.0275678	0.495978	7.19353	circRNA_4403|Chr3:145092634_145129362_+;circRNA_4402|Chr3:145092634_145098350_+
GO:0035255	ionotropic glutamate receptor binding	molecular_function	binding	3	371	32	6672	0.261888	0.807299	1.68598	circRNA_6219|Chr7:130522030_130524289_+;circRNA_0647|Chr1:251455609_251485480_+;circRNA_3686|Chr2:195768840_195795666_-
GO:0035261	external genitalia morphogenesis	biological_process	developmental process|multicellular organismal process|reproduction|reproductive process	1	371	8	6672	0.367413	0.807299	2.24798	circRNA_3458|Chr2:57539193_57544062_-
GO:0035264	multicellular organism growth	biological_process	developmental process|growth|multicellular organismal process	3	371	63	6672	0.688968	0.862156	0.856373	circRNA_0447|Chr1:200606971_200615170_-;circRNA_6103|Chr7:76114791_76119201_+;circRNA_7065|ChrX:4819220_4832241_-
GO:0035265	organ growth	biological_process	developmental process|growth|multicellular organismal process	2	371	13	6672	0.160722	0.807299	2.76674	circRNA_0447|Chr1:200606971_200615170_-;circRNA_3057|Chr18:72593000_72595275_+
GO:0035267	NuA4 histone acetyltransferase complex	cellular_component	cell|cell part|macromolecular complex|membrane-enclosed lumen|organelle|organelle part	2	371	8	6672	0.0691104	0.671779	4.49596	circRNA_1547|Chr12:13717791_13718009_-;circRNA_1679|Chr12:51960260_51961629_+
GO:0035278	miRNA mediated inhibition of translation	biological_process	biological regulation|cellular process|metabolic process|negative regulation of biological process|regulation of biological process	3	371	17	6672	0.0649315	0.671779	3.17362	circRNA_0544|Chr1:220039308_220042767_-;circRNA_0547|Chr1:220042074_220049075_-;circRNA_0543|Chr1:220039308_220040146_-
GO:0035327	transcriptionally active chromatin	cellular_component	cell|cell part|organelle|organelle part	1	371	14	6672	0.551462	0.825583	1.28456	circRNA_0921|Chr10:38712831_38720071_+
GO:0035329	hippo signaling	biological_process	biological regulation|cellular process|regulation of biological process|response to stimulus|signaling	1	371	27	6672	0.787287	0.903596	0.666068	circRNA_0375|Chr1:177651557_177654228_+
GO:0035335	peptidyl-tyrosine dephosphorylation	biological_process	cellular process|metabolic process	4	371	59	6672	0.417374	0.807299	1.21924	circRNA_5059|Chr5:48695038_48698976_+;circRNA_2831|Chr18:301858_306376_-;circRNA_0647|Chr1:251455609_251485480_+;circRNA_1029|Chr10:62751173_62767418_-
GO:0035371	microtubule plus-end	cellular_component	cell|cell part|organelle|organelle part	1	371	16	6672	0.60006	0.842385	1.12399	circRNA_1591|Chr12:25226326_25234184_+
GO:0035385	Roundabout signaling pathway	biological_process	biological regulation|cellular process|regulation of biological process|response to stimulus|signaling	1	371	9	6672	0.402631	0.807299	1.9982	circRNA_1288|Chr11:10020678_10022991_+
GO:0035459	cargo loading into vesicle	biological_process	cellular component organization or biogenesis|cellular process|establishment of localization|localization	1	371	11	6672	0.467307	0.807299	1.63489	circRNA_0290|Chr1:154405931_154425509_+
GO:0035497	cAMP response element binding	molecular_function	binding	1	371	14	6672	0.551462	0.825583	1.28456	circRNA_4669|Chr4:64894605_64899587_-
GO:0035507	regulation of myosin-light-chain-phosphatase activity	biological_process	biological regulation|cellular process|metabolic process|regulation of biological process	1	371	8	6672	0.367413	0.807299	2.24798	circRNA_6001|Chr7:51425330_51432888_-
GO:0035508	positive regulation of myosin-light-chain-phosphatase activity	biological_process	biological regulation|cellular process|metabolic process|positive regulation of biological process|regulation of biological process	1	371	8	6672	0.367413	0.807299	2.24798	circRNA_6001|Chr7:51425330_51432888_-
GO:0035517	PR-DUB complex	cellular_component	cell|cell part|macromolecular complex|organelle|organelle part	2	371	11	6672	0.121747	0.807299	3.26979	circRNA_4413|Chr3:148837814_148842440_+;circRNA_4416|Chr3:148837814_148862118_+
GO:0035522	monoubiquitinated histone H2A deubiquitination	biological_process	cellular component organization or biogenesis|cellular process|metabolic process	2	371	8	6672	0.0691104	0.671779	4.49596	circRNA_4413|Chr3:148837814_148842440_+;circRNA_4416|Chr3:148837814_148862118_+
GO:0035523	protein K29-linked deubiquitination	biological_process	cellular process|metabolic process	1	371	14	6672	0.551462	0.825583	1.28456	circRNA_0485|Chr1:204960841_204961691_+
GO:0035556	intracellular signal transduction	biological_process	biological regulation|cellular process|regulation of biological process|response to stimulus|signaling	12	371	289	6672	0.888684	0.948921	0.746733	circRNA_4183|Chr3:59075644_59085278_+;circRNA_2146|Chr14:88724076_88725530_-;circRNA_2865|Chr18:6047215_6051719_-;circRNA_3572|Chr2:144876416_144917472_+;circRNA_5806|Chr6:124625936_124680274_-;circRNA_2304|Chr15:41008529_41011344_+;circRNA_6919|Chr9:71920586_71955010_+;circRNA_2562|Chr16:63915078_63933482_+;circRNA_6917|Chr9:71915420_71927987_+;circRNA_2151|Chr14:88786305_88792540_-;circRNA_6415…
GO:0035602	fibroblast growth factor receptor signaling pathway involved in negative regulation of apoptotic process in bone marrow	biological_process	biological regulation|cellular process|negative regulation of biological process|regulation of biological process|response to stimulus|signaling	1	371	5	6672	0.248846	0.807299	3.59677	circRNA_0447|Chr1:200606971_200615170_-
GO:0035603	fibroblast growth factor receptor signaling pathway involved in hemopoiesis	biological_process	biological regulation|cellular process|developmental process|immune system process|multicellular organismal process|regulation of biological process|response to stimulus|signaling	1	371	5	6672	0.248846	0.807299	3.59677	circRNA_0447|Chr1:200606971_200615170_-
GO:0035604	fibroblast growth factor receptor signaling pathway involved in positive regulation of cell proliferation in bone marrow	biological_process	biological regulation|cellular process|positive regulation of biological process|regulation of biological process|response to stimulus|signaling	1	371	5	6672	0.248846	0.807299	3.59677	circRNA_0447|Chr1:200606971_200615170_-
GO:0035607	fibroblast growth factor receptor signaling pathway involved in orbitofrontal cortex development	biological_process	biological regulation|cellular process|developmental process|multicellular organismal process|regulation of biological process|response to stimulus|signaling	1	371	5	6672	0.248846	0.807299	3.59677	circRNA_0447|Chr1:200606971_200615170_-
GO:0035609	C-terminal protein deglutamylation	biological_process	cellular process|metabolic process	1	371	16	6672	0.60006	0.842385	1.12399	circRNA_2614|Chr17:5511386_5548199_+
GO:0035610	protein side chain deglutamylation	biological_process	cellular process|metabolic process	1	371	15	6672	0.576456	0.832613	1.19892	circRNA_2614|Chr17:5511386_5548199_+
GO:0035615	clathrin adaptor activity	molecular_function	binding|transporter activity	1	371	18	6672	0.643406	0.848633	0.999102	circRNA_0290|Chr1:154405931_154425509_+
GO:0035617	stress granule disassembly	biological_process	cellular component organization or biogenesis|cellular process	1	371	5	6672	0.248846	0.807299	3.59677	circRNA_2726|Chr17:54209230_54209739_+
GO:0035640	exploration behavior	biological_process	NA	1	371	8	6672	0.367413	0.807299	2.24798	circRNA_6219|Chr7:130522030_130524289_+
GO:0035690	cellular response to drug	biological_process	cellular process|response to stimulus	4	371	48	6672	0.276607	0.807299	1.49865	circRNA_3745|Chr2:210808354_210822401_-;circRNA_3744|Chr2:210806416_210806638_+;circRNA_3733|Chr2:208198684_208203924_-;circRNA_6001|Chr7:51425330_51432888_-
GO:0035748	myelin sheath abaxonal region	cellular_component	cell|cell part	1	371	9	6672	0.402631	0.807299	1.9982	circRNA_3283|Chr19:61714402_61714542_+
GO:0035773	insulin secretion involved in cellular response to glucose stimulus	biological_process	biological regulation|cellular process|establishment of localization|localization|response to stimulus|signaling	3	371	8	6672	0.0077439	0.293409	6.74394	circRNA_0544|Chr1:220039308_220042767_-;circRNA_0547|Chr1:220042074_220049075_-;circRNA_0543|Chr1:220039308_220040146_-
GO:0035774	positive regulation of insulin secretion involved in cellular response to glucose stimulus	biological_process	biological regulation|cellular process|establishment of localization|localization|positive regulation of biological process|regulation of biological process|response to stimulus|signaling	2	371	13	6672	0.160722	0.807299	2.76674	circRNA_3876|Chr20:4095939_4118506_+;circRNA_2726|Chr17:54209230_54209739_+
GO:0035865	cellular response to potassium ion	biological_process	cellular process|response to stimulus	1	371	10	6672	0.435893	0.807299	1.79838	circRNA_6157|Chr7:116072198_116158807_-
GO:0035883	enteroendocrine cell differentiation	biological_process	cellular process|developmental process	3	371	6	6672	0.00300709	0.256981	8.99191	circRNA_0544|Chr1:220039308_220042767_-;circRNA_0547|Chr1:220042074_220049075_-;circRNA_0543|Chr1:220039308_220040146_-
GO:0035902	response to immobilization stress	biological_process	response to stimulus	4	371	21	6672	0.0265205	0.495978	3.42549	circRNA_1547|Chr12:13717791_13718009_-;circRNA_6212|Chr7:129690245_129708614_-;circRNA_6211|Chr7:129678610_129680736_-;circRNA_0728|Chr1:263249208_263253633_-
GO:0035904	aorta development	biological_process	developmental process|multicellular organismal process	3	371	41	6672	0.400887	0.807299	1.31589	circRNA_3395|Chr2:34476081_34503654_+;circRNA_3391|Chr2:34396320_34404958_+;circRNA_3390|Chr2:34373875_34404958_+
GO:0035909	aorta morphogenesis	biological_process	developmental process|multicellular organismal process	1	371	11	6672	0.467307	0.807299	1.63489	circRNA_3792|Chr2:230311167_230317038_-
GO:0035924	cellular response to vascular endothelial growth factor stimulus	biological_process	cellular process|response to stimulus	2	371	17	6672	0.243383	0.807299	2.11574	circRNA_6937|Chr9:78945266_78947892_-;circRNA_6935|Chr9:78911759_78911926_+
GO:0035987	endodermal cell differentiation	biological_process	cellular process|developmental process|multicellular organismal process	5	371	20	6672	0.00400616	0.272375	4.49596	circRNA_6937|Chr9:78945266_78947892_-;circRNA_3914|Chr20:12666784_12667523_+;circRNA_6935|Chr9:78911759_78911926_+;circRNA_6551|Chr8:87100666_87102375_-;circRNA_2849|Chr18:2445774_2446986_+
GO:0036002	pre-mRNA binding	molecular_function	binding	4	371	12	6672	0.00325836	0.257035	5.99461	circRNA_2759|Chr17:75295083_75352500_+;circRNA_0544|Chr1:220039308_220042767_-;circRNA_0547|Chr1:220042074_220049075_-;circRNA_0543|Chr1:220039308_220040146_-
GO:0036035	osteoclast development	biological_process	cellular process|developmental process|immune system process|multicellular organismal process	1	371	13	6672	0.524998	0.816973	1.38337	circRNA_4829|Chr4:131439626_131453028_-
GO:0036064	ciliary basal body	cellular_component	cell|cell part|organelle|organelle part	2	371	75	6672	0.926944	0.968667	0.479569	circRNA_6772|Chr9:26636334_26669699_-;circRNA_4795|Chr4:117422680_117436312_+
GO:0036098	male germ-line stem cell population maintenance	biological_process	developmental process|multicellular organismal process	1	371	5	6672	0.248846	0.807299	3.59677	circRNA_3944|Chr20:22822066_22856689_-
GO:0036120	cellular response to platelet-derived growth factor stimulus	biological_process	cellular process|response to stimulus	2	371	25	6672	0.408823	0.807299	1.43871	circRNA_6937|Chr9:78945266_78947892_-;circRNA_6935|Chr9:78911759_78911926_+
GO:0036336	dendritic cell migration	biological_process	cellular process|immune system process|localization|locomotion	1	371	10	6672	0.435893	0.807299	1.79838	circRNA_0617|Chr1:243014234_243018525_+
GO:0036459	thiol-dependent ubiquitinyl hydrolase activity	molecular_function	catalytic activity	1	371	41	6672	0.90491	0.957673	0.43863	circRNA_0485|Chr1:204960841_204961691_+
GO:0036464	cytoplasmic ribonucleoprotein granule	cellular_component	cell|cell part|macromolecular complex|organelle	5	371	36	6672	0.0471812	0.612459	2.49775	circRNA_2766|Chr17:76245627_76265943_-;circRNA_1547|Chr12:13717791_13718009_-;circRNA_6934|Chr9:78341845_78350281_-;circRNA_5386|Chr5:150382262_150383814_-;circRNA_2768|Chr17:76260636_76265943_-
GO:0038023	signaling receptor activity	molecular_function	molecular transducer activity|receptor activity	1	371	38	6672	0.886988	0.948	0.473259	circRNA_3283|Chr19:61714402_61714542_+
GO:0038063	collagen-activated tyrosine kinase receptor signaling pathway	biological_process	biological regulation|cellular process|regulation of biological process|response to stimulus|signaling	1	371	20	6672	0.682064	0.858756	0.899191	circRNA_1147|Chr10:82752455_82752793_+
GO:0038066	p38MAPK cascade	biological_process	biological regulation|cellular process|metabolic process|regulation of biological process|response to stimulus|signaling	1	371	10	6672	0.435893	0.807299	1.79838	circRNA_0038|Chr1:15545013_15551204_+
GO:0038083	peptidyl-tyrosine autophosphorylation	biological_process	cellular process|metabolic process	2	371	43	6672	0.699251	0.864628	0.836457	circRNA_1346|Chr11:34865447_34879143_+;circRNA_1349|Chr11:34879058_34932316_+
GO:0038092	nodal signaling pathway	biological_process	biological regulation|cellular process|regulation of biological process|response to stimulus|signaling	1	371	7	6672	0.330125	0.807299	2.56912	circRNA_3057|Chr18:72593000_72595275_+
GO:0038180	nerve growth factor signaling pathway	biological_process	biological regulation|cellular process|regulation of biological process|response to stimulus|signaling	1	371	7	6672	0.330125	0.807299	2.56912	circRNA_3733|Chr2:208198684_208203924_-
GO:0040014	regulation of multicellular organism growth	biological_process	biological regulation|developmental process|growth|multicellular organismal process|regulation of biological process	1	371	18	6672	0.643406	0.848633	0.999102	circRNA_0447|Chr1:200606971_200615170_-
GO:0040015	negative regulation of multicellular organism growth	biological_process	biological regulation|developmental process|growth|multicellular organismal process|negative regulation of biological process|regulation of biological process	1	371	13	6672	0.524998	0.816973	1.38337	circRNA_4795|Chr4:117422680_117436312_+
GO:0040016	embryonic cleavage	biological_process	cellular process|developmental process|multicellular organismal process	1	371	6	6672	0.290646	0.807299	2.9973	circRNA_4448|Chr3:156690910_156699465_+
GO:0040018	positive regulation of multicellular organism growth	biological_process	biological regulation|developmental process|growth|multicellular organismal process|positive regulation of biological process|regulation of biological process	1	371	12	6672	0.496977	0.810254	1.49865	circRNA_3458|Chr2:57539193_57544062_-
GO:0040036	regulation of fibroblast growth factor receptor signaling pathway	biological_process	biological regulation|cellular process|regulation of biological process|response to stimulus|signaling	2	371	8	6672	0.0691104	0.671779	4.49596	circRNA_0447|Chr1:200606971_200615170_-;circRNA_6753|Chr9:18653895_18660843_+
GO:0042054	histone methyltransferase activity	molecular_function	catalytic activity	1	371	15	6672	0.576456	0.832613	1.19892	circRNA_1063|Chr10:67363508_67364610_+
GO:0042060	wound healing	biological_process	response to stimulus	13	371	120	6672	0.015455	0.42121	1.94825	circRNA_6828|Chr9:52047552_52048745_+;circRNA_6937|Chr9:78945266_78947892_-;circRNA_6830|Chr9:52048089_52048881_+;circRNA_1147|Chr10:82752455_82752793_+;circRNA_6827|Chr9:52047552_52047844_+;circRNA_6825|Chr9:52043678_52045132_+;circRNA_0038|Chr1:15545013_15551204_+;circRNA_6935|Chr9:78911759_78911926_+;circRNA_0447|Chr1:200606971_200615170_-;circRNA_2562|Chr16:63915078_63933482_+;circRNA_3899|Ch…
GO:0042102	positive regulation of T cell proliferation	biological_process	biological adhesion|biological regulation|cellular process|immune system process|positive regulation of biological process|regulation of biological process	1	371	10	6672	0.435893	0.807299	1.79838	circRNA_2222|Chr15:3233141_3293913_-
GO:0042117	monocyte activation	biological_process	cellular process|immune system process	1	371	11	6672	0.467307	0.807299	1.63489	circRNA_4829|Chr4:131439626_131453028_-
GO:0042118	endothelial cell activation	biological_process	cellular process	2	371	18	6672	0.264453	0.807299	1.9982	circRNA_6311|Chr8:24427222_24434916_+;circRNA_4829|Chr4:131439626_131453028_-
GO:0042127	regulation of cell proliferation	biological_process	biological regulation|cellular process|regulation of biological process	2	371	140	6672	0.997128	0.998589	0.256912	circRNA_0447|Chr1:200606971_200615170_-;circRNA_0375|Chr1:177651557_177654228_+
GO:0042130	negative regulation of T cell proliferation	biological_process	biological adhesion|biological regulation|cellular process|immune system process|negative regulation of biological process|regulation of biological process	1	371	18	6672	0.643406	0.848633	0.999102	circRNA_3876|Chr20:4095939_4118506_+
GO:0042133	neurotransmitter metabolic process	biological_process	biological regulation|cellular process|metabolic process	1	371	15	6672	0.576456	0.832613	1.19892	circRNA_2614|Chr17:5511386_5548199_+
GO:0042147	retrograde transport, endosome to Golgi	biological_process	establishment of localization|localization	5	371	72	6672	0.371774	0.807299	1.24888	circRNA_4699|Chr4:67299951_67301045_-;circRNA_6919|Chr9:71920586_71955010_+;circRNA_5962|Chr7:29284390_29288495_+;circRNA_6917|Chr9:71915420_71927987_+;circRNA_1923|Chr14:2924636_2924865_+
GO:0042162	telomeric DNA binding	molecular_function	binding	2	371	23	6672	0.368635	0.807299	1.56381	circRNA_2766|Chr17:76245627_76265943_-;circRNA_2768|Chr17:76260636_76265943_-
GO:0042177	negative regulation of protein catabolic process	biological_process	biological regulation|metabolic process|negative regulation of biological process|regulation of biological process	3	371	38	6672	0.35474	0.807299	1.41978	circRNA_3257|Chr19:54803498_54815443_+;circRNA_2562|Chr16:63915078_63933482_+;circRNA_3258|Chr19:54803498_54822499_+
GO:0042178	xenobiotic catabolic process	biological_process	cellular process|metabolic process|response to stimulus	3	371	8	6672	0.0077439	0.293409	6.74394	circRNA_3745|Chr2:210808354_210822401_-;circRNA_3744|Chr2:210806416_210806638_+;circRNA_3738|Chr2:210723584_210806489_-
GO:0042246	tissue regeneration	biological_process	developmental process|growth|response to stimulus	2	371	7	6672	0.0537688	0.612665	5.13824	circRNA_5945|Chr7:23546534_23546690_+;circRNA_6067|Chr7:72043294_72073470_+
GO:0042254	ribosome biogenesis	biological_process	cellular component organization or biogenesis	1	371	10	6672	0.435893	0.807299	1.79838	circRNA_4054|Chr3:7456433_7475230_+
GO:0042277	peptide binding	molecular_function	binding	4	371	43	6672	0.215196	0.807299	1.67291	circRNA_3283|Chr19:61714402_61714542_+;circRNA_1165|Chr10:85164768_85172858_-;circRNA_1270|Chr10:110157631_110164041_-;circRNA_2599|Chr17:599906_610676_+
GO:0042297	vocal learning	biological_process	multicellular organismal process|response to stimulus	1	371	5	6672	0.248846	0.807299	3.59677	circRNA_6219|Chr7:130522030_130524289_+
GO:0042325	regulation of phosphorylation	biological_process	biological regulation|cellular process|metabolic process|regulation of biological process	1	371	7	6672	0.330125	0.807299	2.56912	circRNA_6934|Chr9:78341845_78350281_-
GO:0042327	positive regulation of phosphorylation	biological_process	biological regulation|cellular process|metabolic process|positive regulation of biological process|regulation of biological process	1	371	19	6672	0.663288	0.852917	0.946517	circRNA_1315|Chr11:31974630_31979720_+
GO:0042383	sarcolemma	cellular_component	cell|cell part|membrane	12	371	157	6672	0.163102	0.807299	1.37456	circRNA_0613|Chr1:242716557_242737019_-;circRNA_4863|Chr4:151118221_151123637_-;circRNA_5368|Chr5:147482283_147483432_+;circRNA_3914|Chr20:12666784_12667523_+;circRNA_6953|Chr9:82558343_82558587_+;circRNA_2432|Chr16:2138232_2142317_-;circRNA_3283|Chr19:61714402_61714542_+;circRNA_7247|ChrX:157322637_157323315_+;circRNA_0568|Chr1:225195375_225196571_+;circRNA_0011|Chr1:6601452_6613874_-;circRNA_69…
GO:0042391	regulation of membrane potential	biological_process	biological regulation	3	371	49	6672	0.518067	0.816973	1.10105	circRNA_1261|Chr10:108486117_108494849_+;circRNA_2726|Chr17:54209230_54209739_+;circRNA_3216|Chr19:39543248_39545672_+
GO:0042393	histone binding	molecular_function	binding	5	371	103	6672	0.685961	0.860995	0.873001	circRNA_5208|Chr5:106171074_106171781_-;circRNA_6212|Chr7:129690245_129708614_-;circRNA_6211|Chr7:129678610_129680736_-;circRNA_0933|Chr10:43227922_43229953_+;circRNA_1458|Chr11:84571220_84583542_-
GO:0042407	cristae formation	biological_process	cellular component organization or biogenesis|cellular process	1	371	7	6672	0.330125	0.807299	2.56912	circRNA_2113|Chr14:82239645_82240095_+
GO:0042470	melanosome	cellular_component	cell|cell part|organelle	1	371	50	6672	0.943382	0.974749	0.359677	circRNA_3283|Chr19:61714402_61714542_+
GO:0042472	inner ear morphogenesis	biological_process	developmental process|multicellular organismal process	1	371	23	6672	0.732356	0.878053	0.781906	circRNA_0447|Chr1:200606971_200615170_-
GO:0042475	odontogenesis of dentin-containing tooth	biological_process	developmental process|multicellular organismal process	2	371	31	6672	0.520964	0.816973	1.16025	circRNA_6753|Chr9:18653895_18660843_+;circRNA_2849|Chr18:2445774_2446986_+
GO:0042476	odontogenesis	biological_process	developmental process|multicellular organismal process	1	371	12	6672	0.496977	0.810254	1.49865	circRNA_0447|Chr1:200606971_200615170_-
GO:0042493	response to drug	biological_process	response to stimulus	16	371	176	6672	0.0351602	0.559784	1.63489	circRNA_3745|Chr2:210808354_210822401_-;circRNA_4561|Chr4:22084945_22091386_+;circRNA_3744|Chr2:210806416_210806638_+;circRNA_2865|Chr18:6047215_6051719_-;circRNA_6937|Chr9:78945266_78947892_-;circRNA_1147|Chr10:82752455_82752793_+;circRNA_3283|Chr19:61714402_61714542_+;circRNA_2985|Chr18:51805551_51807909_+;circRNA_6935|Chr9:78911759_78911926_+;circRNA_3773|Chr2:225348168_225352508_-;circRNA_552…
GO:0042531	positive regulation of tyrosine phosphorylation of STAT protein	biological_process	biological regulation|cellular process|metabolic process|positive regulation of biological process|regulation of biological process|response to stimulus|signaling	1	371	7	6672	0.330125	0.807299	2.56912	circRNA_3670|Chr2:189226433_189230967_-
GO:0042532	negative regulation of tyrosine phosphorylation of STAT protein	biological_process	biological regulation|cellular process|metabolic process|negative regulation of biological process|regulation of biological process|response to stimulus|signaling	1	371	12	6672	0.496977	0.810254	1.49865	circRNA_1063|Chr10:67363508_67364610_+
GO:0042542	response to hydrogen peroxide	biological_process	response to stimulus	1	371	40	6672	0.899275	0.954665	0.449596	circRNA_1147|Chr10:82752455_82752793_+
GO:0042552	myelination	biological_process	cellular process|developmental process|multicellular organismal process	2	371	21	6672	0.327422	0.807299	1.71275	circRNA_0734|Chr1:264001511_264066989_+;circRNA_4523|Chr4:7700000_7706702_+
GO:0042592	homeostatic process	biological_process	biological regulation	1	371	6	6672	0.290646	0.807299	2.9973	circRNA_3152|Chr19:32214551_32215127_+
GO:0042593	glucose homeostasis	biological_process	biological regulation	6	371	57	6672	0.0951515	0.778773	1.89303	circRNA_4863|Chr4:151118221_151123637_-;circRNA_0544|Chr1:220039308_220042767_-;circRNA_4795|Chr4:117422680_117436312_+;circRNA_0547|Chr1:220042074_220049075_-;circRNA_4461|Chr3:161474539_161487731_-;circRNA_0543|Chr1:220039308_220040146_-
GO:0042594	response to starvation	biological_process	response to stimulus	1	371	51	6672	0.946554	0.974936	0.352624	circRNA_0716|Chr1:259479327_259489683_-
GO:0042605	peptide antigen binding	molecular_function	binding	1	371	11	6672	0.467307	0.807299	1.63489	circRNA_3876|Chr20:4095939_4118506_+
GO:0042623	ATPase activity, coupled	molecular_function	catalytic activity	1	371	10	6672	0.435893	0.807299	1.79838	circRNA_3885|Chr20:4896892_4921063_-
GO:0042626	ATPase activity, coupled to transmembrane movement of substances	molecular_function	catalytic activity|transporter activity	2	371	28	6672	0.466633	0.807299	1.28456	circRNA_1942|Chr14:5870915_5943886_+;circRNA_3773|Chr2:225348168_225352508_-
GO:0042632	cholesterol homeostasis	biological_process	biological regulation	1	371	33	6672	0.849328	0.925104	0.544964	circRNA_4795|Chr4:117422680_117436312_+
GO:0042711	maternal behavior	biological_process	multicellular organismal process|reproduction|reproductive process	3	371	21	6672	0.108099	0.801999	2.56912	circRNA_0591|Chr1:233578229_233581182_+;circRNA_0647|Chr1:251455609_251485480_+;circRNA_5682|Chr6:74325751_74326157_+
GO:0042733	embryonic digit morphogenesis	biological_process	developmental process|multicellular organismal process	3	371	60	6672	0.656562	0.852917	0.899191	circRNA_4183|Chr3:59075644_59085278_+;circRNA_0591|Chr1:233578229_233581182_+;circRNA_6103|Chr7:76114791_76119201_+
GO:0042734	presynaptic membrane	cellular_component	cell|cell part|membrane|membrane part|synapse|synapse part	2	371	32	6672	0.538235	0.825583	1.12399	circRNA_4863|Chr4:151118221_151123637_-;circRNA_0290|Chr1:154405931_154425509_+
GO:0042738	exogenous drug catabolic process	biological_process	cellular process|metabolic process|response to stimulus	1	371	6	6672	0.290646	0.807299	2.9973	circRNA_5223|Chr5:115146569_115199307_-
GO:0042742	defense response to bacterium	biological_process	multi-organism process|response to stimulus	2	371	12	6672	0.140942	0.807299	2.9973	circRNA_2459|Chr16:7226824_7229432_-;circRNA_3367|Chr2:30384653_30433774_-
GO:0042752	regulation of circadian rhythm	biological_process	biological regulation|regulation of biological process|rhythmic process	1	371	33	6672	0.849328	0.925104	0.544964	circRNA_1270|Chr10:110157631_110164041_-
GO:0042760	very long-chain fatty acid catabolic process	biological_process	cellular process|metabolic process	1	371	7	6672	0.330125	0.807299	2.56912	circRNA_3773|Chr2:225348168_225352508_-
GO:0042761	very long-chain fatty acid biosynthetic process	biological_process	cellular process|metabolic process	1	371	10	6672	0.435893	0.807299	1.79838	circRNA_0576|Chr1:226119298_226139368_-
GO:0042771	intrinsic apoptotic signaling pathway in response to DNA damage by p53 class mediator	biological_process	biological regulation|cellular process|regulation of biological process|response to stimulus|signaling	2	371	13	6672	0.160722	0.807299	2.76674	circRNA_4697|Chr4:66567829_66568912_-;circRNA_5526|Chr6:11219826_11221789_-
GO:0042800	histone methyltransferase activity (H3-K4 specific)	molecular_function	catalytic activity	2	371	35	6672	0.58743	0.842385	1.02765	circRNA_6243|Chr7:140533891_140536242_-;circRNA_3663|Chr2:188308301_188309036_+
GO:0042802	identical protein binding	molecular_function	binding	28	371	528	6672	0.635452	0.848633	0.953688	circRNA_3621|Chr2:184309074_184309661_-;circRNA_1547|Chr12:13717791_13718009_-;circRNA_6219|Chr7:130522030_130524289_+;circRNA_6937|Chr9:78945266_78947892_-;circRNA_4330|Chr3:117726599_117728604_-;circRNA_1147|Chr10:82752455_82752793_+;circRNA_6953|Chr9:82558343_82558587_+;circRNA_5902|Chr6:144189453_144275272_+;circRNA_3257|Chr19:54803498_54815443_+;circRNA_0290|Chr1:154405931_154425509_+;circRN…
GO:0042803	protein homodimerization activity	molecular_function	binding	19	371	390	6672	0.761564	0.889503	0.876135	circRNA_3745|Chr2:210808354_210822401_-;circRNA_3744|Chr2:210806416_210806638_+;circRNA_3738|Chr2:210723584_210806489_-;circRNA_4403|Chr3:145092634_145129362_+;circRNA_4402|Chr3:145092634_145098350_+;circRNA_6066|Chr7:71069214_71077102_+;circRNA_0038|Chr1:15545013_15551204_+;circRNA_4853|Chr4:147948449_147949383_-;circRNA_0447|Chr1:200606971_200615170_-;circRNA_6934|Chr9:78341845_78350281_-;circR…
GO:0042826	histone deacetylase binding	molecular_function	binding	4	371	52	6672	0.327556	0.807299	1.38337	circRNA_0233|Chr1:128239552_128243030_-;circRNA_3458|Chr2:57539193_57544062_-;circRNA_5617|Chr6:41822551_41830656_-;circRNA_6753|Chr9:18653895_18660843_+
GO:0042974	retinoic acid receptor binding	molecular_function	binding	2	371	32	6672	0.538235	0.825583	1.12399	circRNA_4413|Chr3:148837814_148842440_+;circRNA_4416|Chr3:148837814_148862118_+
GO:0042975	peroxisome proliferator activated receptor binding	molecular_function	binding	3	371	25	6672	0.159475	0.807299	2.15806	circRNA_5617|Chr6:41822551_41830656_-;circRNA_4413|Chr3:148837814_148842440_+;circRNA_4416|Chr3:148837814_148862118_+
GO:0042981	regulation of apoptotic process	biological_process	biological regulation|cellular process|regulation of biological process	1	371	121	6672	0.999077	0.999564	0.148627	circRNA_7179|ChrX:109996163_110063748_+
GO:0042994	cytoplasmic sequestering of transcription factor	biological_process	biological regulation|establishment of localization|localization|negative regulation of biological process|regulation of biological process	1	371	5	6672	0.248846	0.807299	3.59677	circRNA_0857|Chr10:13944932_13945211_+
GO:0042995	cell projection	cellular_component	cell|cell part	2	371	65	6672	0.88408	0.946865	0.553349	circRNA_2562|Chr16:63915078_63933482_+;circRNA_0647|Chr1:251455609_251485480_+
GO:0043005	neuron projection	cellular_component	cell|cell part	11	371	243	6672	0.80218	0.909883	0.814083	circRNA_6219|Chr7:130522030_130524289_+;circRNA_0290|Chr1:154405931_154425509_+;circRNA_1818|Chr13:77863217_77865781_-;circRNA_3733|Chr2:208198684_208203924_-;circRNA_4523|Chr4:7700000_7706702_+;circRNA_1231|Chr10:95327724_95328546_-;circRNA_3367|Chr2:30384653_30433774_-;circRNA_2726|Chr17:54209230_54209739_+;circRNA_0647|Chr1:251455609_251485480_+;circRNA_1270|Chr10:110157631_110164041_-;circRNA…
GO:0043010	camera-type eye development	biological_process	developmental process|multicellular organismal process	4	371	48	6672	0.276607	0.807299	1.49865	circRNA_4863|Chr4:151118221_151123637_-;circRNA_4330|Chr3:117726599_117728604_-;circRNA_6103|Chr7:76114791_76119201_+;circRNA_6894|Chr9:67242046_67257543_+
GO:0043014	alpha-tubulin binding	molecular_function	binding	1	371	21	6672	0.699797	0.864628	0.856373	circRNA_4837|Chr4:140870957_140872418_+
GO:0043021	ribonucleoprotein complex binding	molecular_function	binding	2	371	20	6672	0.306534	0.807299	1.79838	circRNA_5687|Chr6:76020953_76031336_+;circRNA_4808|Chr4:120295643_120298656_-
GO:0043022	ribosome binding	molecular_function	binding	1	371	18	6672	0.643406	0.848633	0.999102	circRNA_2113|Chr14:82239645_82240095_+
GO:0043025	neuronal cell body	cellular_component	cell|cell part	10	371	269	6672	0.938081	0.974468	0.668544	circRNA_4863|Chr4:151118221_151123637_-;circRNA_4658|Chr4:62270233_62272586_+;circRNA_0290|Chr1:154405931_154425509_+;circRNA_1818|Chr13:77863217_77865781_-;circRNA_0939|Chr10:45771832_45778634_-;circRNA_1315|Chr11:31974630_31979720_+;circRNA_5414|Chr5:157690578_157712883_+;circRNA_1288|Chr11:10020678_10022991_+;circRNA_3367|Chr2:30384653_30433774_-;circRNA_3727|Chr2:206964921_206976810_-
GO:0043027	cysteine-type endopeptidase inhibitor activity involved in apoptotic process	molecular_function	enzyme regulator activity	1	371	9	6672	0.402631	0.807299	1.9982	circRNA_3367|Chr2:30384653_30433774_-
GO:0043034	costamere	cellular_component	cell|cell part|organelle|organelle part	3	371	37	6672	0.339237	0.807299	1.45815	circRNA_0613|Chr1:242716557_242737019_-;circRNA_0568|Chr1:225195375_225196571_+;circRNA_0609|Chr1:242607845_242631822_-
GO:0043065	positive regulation of apoptotic process	biological_process	biological regulation|cellular process|positive regulation of biological process|regulation of biological process	10	371	169	6672	0.466852	0.807299	1.06413	circRNA_4183|Chr3:59075644_59085278_+;circRNA_0591|Chr1:233578229_233581182_+;circRNA_3283|Chr19:61714402_61714542_+;circRNA_0038|Chr1:15545013_15551204_+;circRNA_6934|Chr9:78341845_78350281_-;circRNA_2034|Chr14:43420836_43461320_+;circRNA_4833|Chr4:133073964_133094100_-;circRNA_3237|Chr19:43265984_43294685_+;circRNA_2849|Chr18:2445774_2446986_+;circRNA_0647|Chr1:251455609_251485480_+
GO:0043066	negative regulation of apoptotic process	biological_process	biological regulation|cellular process|negative regulation of biological process|regulation of biological process	12	371	265	6672	0.809987	0.91232	0.814362	circRNA_6937|Chr9:78945266_78947892_-;circRNA_0591|Chr1:233578229_233581182_+;circRNA_6772|Chr9:26636334_26669699_-;circRNA_6935|Chr9:78911759_78911926_+;circRNA_2439|Chr16:2354385_2354582_-;circRNA_4795|Chr4:117422680_117436312_+;circRNA_0447|Chr1:200606971_200615170_-;circRNA_6934|Chr9:78341845_78350281_-;circRNA_2034|Chr14:43420836_43461320_+;circRNA_2849|Chr18:2445774_2446986_+;circRNA_0647|C…
GO:0043086	negative regulation of catalytic activity	biological_process	biological regulation	3	371	19	6672	0.085342	0.732146	2.83955	circRNA_4897|Chr4:157436084_157436365_-;circRNA_5945|Chr7:23546534_23546690_+;circRNA_6001|Chr7:51425330_51432888_-
GO:0043087	regulation of GTPase activity	biological_process	biological regulation	3	371	70	6672	0.755552	0.888553	0.770735	circRNA_4098|Chr3:21782079_21792112_+;circRNA_4094|Chr3:21721366_21736929_+;circRNA_0357|Chr1:175200414_175218889_-
GO:0043123	positive regulation of I-kappaB kinase/NF-kappaB signaling	biological_process	biological regulation|cellular process|positive regulation of biological process|regulation of biological process|response to stimulus|signaling	1	371	52	6672	0.949549	0.976693	0.345843	circRNA_3876|Chr20:4095939_4118506_+
GO:0043124	negative regulation of I-kappaB kinase/NF-kappaB signaling	biological_process	biological regulation|cellular process|negative regulation of biological process|regulation of biological process|response to stimulus|signaling	1	371	44	6672	0.919996	0.968144	0.408723	circRNA_3663|Chr2:188308301_188309036_+
GO:0043130	ubiquitin binding	molecular_function	binding	1	371	37	6672	0.880294	0.94429	0.486049	circRNA_6107|Chr7:76837537_76845975_-
GO:0043149	stress fiber assembly	biological_process	cellular component organization or biogenesis|cellular process	2	371	48	6672	0.755547	0.888553	0.749326	circRNA_3283|Chr19:61714402_61714542_+;circRNA_0716|Chr1:259479327_259489683_-
GO:0043153	entrainment of circadian clock by photoperiod	biological_process	biological regulation|regulation of biological process|response to stimulus|rhythmic process	3	371	10	6672	0.0152695	0.42121	5.39515	circRNA_0544|Chr1:220039308_220042767_-;circRNA_0547|Chr1:220042074_220049075_-;circRNA_0543|Chr1:220039308_220040146_-
GO:0043154	negative regulation of cysteine-type endopeptidase activity involved in apoptotic process	biological_process	biological regulation|cellular process|metabolic process|negative regulation of biological process|regulation of biological process	1	371	24	6672	0.74729	0.883396	0.749326	circRNA_3367|Chr2:30384653_30433774_-
GO:0043161	proteasome-mediated ubiquitin-dependent protein catabolic process	biological_process	cellular process|metabolic process	2	371	97	6672	0.974628	0.987284	0.370801	circRNA_3621|Chr2:184309074_184309661_-;circRNA_3216|Chr19:39543248_39545672_+
GO:0043171	peptide catabolic process	biological_process	cellular process|metabolic process	3	371	21	6672	0.108099	0.801999	2.56912	circRNA_1165|Chr10:85164768_85172858_-;circRNA_6067|Chr7:72043294_72073470_+;circRNA_2599|Chr17:599906_610676_+
GO:0043195	terminal bouton	cellular_component	cell|cell part|synapse|synapse part	2	371	27	6672	0.447726	0.807299	1.33214	circRNA_3791|Chr2:227687641_227700240_+;circRNA_1315|Chr11:31974630_31979720_+
GO:0043197	dendritic spine	cellular_component	cell|cell part|synapse|synapse part	10	371	129	6672	0.179869	0.807299	1.3941	circRNA_6219|Chr7:130522030_130524289_+;circRNA_4403|Chr3:145092634_145129362_+;circRNA_4402|Chr3:145092634_145098350_+;circRNA_4658|Chr4:62270233_62272586_+;circRNA_3283|Chr19:61714402_61714542_+;circRNA_2439|Chr16:2354385_2354582_-;circRNA_1315|Chr11:31974630_31979720_+;circRNA_5414|Chr5:157690578_157712883_+;circRNA_2411|Chr15:106417736_106434369_+;circRNA_0647|Chr1:251455609_251485480_+
GO:0043198	dendritic shaft	cellular_component	cell|cell part	3	371	40	6672	0.385587	0.807299	1.34879	circRNA_4863|Chr4:151118221_151123637_-;circRNA_4403|Chr3:145092634_145129362_+;circRNA_4402|Chr3:145092634_145098350_+
GO:0043200	response to amino acid	biological_process	response to stimulus	5	371	21	6672	0.00502239	0.272375	4.28186	circRNA_3745|Chr2:210808354_210822401_-;circRNA_3744|Chr2:210806416_210806638_+;circRNA_5945|Chr7:23546534_23546690_+;circRNA_3367|Chr2:30384653_30433774_-;circRNA_5526|Chr6:11219826_11221789_-
GO:0043204	perikaryon	cellular_component	cell|cell part	4	371	54	6672	0.353278	0.807299	1.33214	circRNA_6212|Chr7:129690245_129708614_-;circRNA_6211|Chr7:129678610_129680736_-;circRNA_3367|Chr2:30384653_30433774_-;circRNA_4448|Chr3:156690910_156699465_+
GO:0043209	myelin sheath	cellular_component	cell|cell part	6	371	66	6672	0.159185	0.807299	1.63489	circRNA_3745|Chr2:210808354_210822401_-;circRNA_3744|Chr2:210806416_210806638_+;circRNA_1547|Chr12:13717791_13718009_-;circRNA_0722|Chr1:261165387_261165588_-;circRNA_3733|Chr2:208198684_208203924_-;circRNA_4948|Chr4:180711145_180722357_-
GO:0043220	Schmidt-Lanterman incisure	cellular_component	cell|cell part	1	371	11	6672	0.467307	0.807299	1.63489	circRNA_0647|Chr1:251455609_251485480_+
GO:0043227	membrane-bounded organelle	cellular_component	organelle	1	371	5	6672	0.248846	0.807299	3.59677	circRNA_2726|Chr17:54209230_54209739_+
GO:0043231	intracellular membrane-bounded organelle	cellular_component	cell|cell part|organelle	27	371	489	6672	0.546177	0.825583	0.992972	circRNA_6157|Chr7:116072198_116158807_-;circRNA_4561|Chr4:22084945_22091386_+;circRNA_1993|Chr14:22619364_22655924_+;circRNA_5223|Chr5:115146569_115199307_-;circRNA_4403|Chr3:145092634_145129362_+;circRNA_1261|Chr10:108486117_108494849_+;circRNA_4402|Chr3:145092634_145098350_+;circRNA_4054|Chr3:7456433_7475230_+;circRNA_1064|Chr10:67497682_67503048_+;circRNA_3020|Chr18:63784568_63786264_+;circRNA…
GO:0043235	receptor complex	cellular_component	macromolecular complex	4	371	89	6672	0.737552	0.881538	0.808262	circRNA_1942|Chr14:5870915_5943886_+;circRNA_3283|Chr19:61714402_61714542_+;circRNA_0447|Chr1:200606971_200615170_-;circRNA_4948|Chr4:180711145_180722357_-
GO:0043236	laminin binding	molecular_function	binding	1	371	12	6672	0.496977	0.810254	1.49865	circRNA_3283|Chr19:61714402_61714542_+
GO:0043249	erythrocyte maturation	biological_process	biological regulation|cellular process|developmental process|immune system process|multicellular organismal process	1	371	13	6672	0.524998	0.816973	1.38337	circRNA_2493|Chr16:19805426_19805902_+
GO:0043267	negative regulation of potassium ion transport	biological_process	biological regulation|establishment of localization|localization|negative regulation of biological process|regulation of biological process	1	371	11	6672	0.467307	0.807299	1.63489	circRNA_0591|Chr1:233578229_233581182_+
GO:0043268	positive regulation of potassium ion transport	biological_process	biological regulation|establishment of localization|localization|positive regulation of biological process|regulation of biological process	1	371	19	6672	0.663288	0.852917	0.946517	circRNA_2726|Chr17:54209230_54209739_+
GO:0043274	phospholipase binding	molecular_function	binding	1	371	10	6672	0.435893	0.807299	1.79838	circRNA_2985|Chr18:51805551_51807909_+
GO:0043280	positive regulation of cysteine-type endopeptidase activity involved in apoptotic process	biological_process	biological regulation|cellular process|metabolic process|positive regulation of biological process|regulation of biological process	1	371	16	6672	0.60006	0.842385	1.12399	circRNA_0038|Chr1:15545013_15551204_+
GO:0043292	contractile fiber	cellular_component	cell|cell part|organelle	3	371	10	6672	0.0152695	0.42121	5.39515	circRNA_6953|Chr9:82558343_82558587_+;circRNA_6001|Chr7:51425330_51432888_-;circRNA_6952|Chr9:82557123_82558587_+
GO:0043295	glutathione binding	molecular_function	binding	3	371	10	6672	0.0152695	0.42121	5.39515	circRNA_3745|Chr2:210808354_210822401_-;circRNA_3744|Chr2:210806416_210806638_+;circRNA_3738|Chr2:210723584_210806489_-
GO:0043325	phosphatidylinositol-3,4-bisphosphate binding	molecular_function	binding	1	371	16	6672	0.60006	0.842385	1.12399	circRNA_1064|Chr10:67497682_67503048_+
GO:0043353	enucleate erythrocyte differentiation	biological_process	biological regulation|cellular process|developmental process|immune system process|multicellular organismal process	1	371	6	6672	0.290646	0.807299	2.9973	circRNA_4186|Chr3:59678949_59680308_-
GO:0043388	positive regulation of DNA binding	biological_process	biological regulation	1	371	13	6672	0.524998	0.816973	1.38337	circRNA_4697|Chr4:66567829_66568912_-
GO:0043394	proteoglycan binding	molecular_function	binding	1	371	5	6672	0.248846	0.807299	3.59677	circRNA_4051|Chr3:6464953_6472752_+
GO:0043401	steroid hormone mediated signaling pathway	biological_process	biological regulation|cellular process|regulation of biological process|response to stimulus|signaling	1	371	19	6672	0.663288	0.852917	0.946517	circRNA_1897|Chr13:106507146_106507561_+
GO:0043406	positive regulation of MAP kinase activity	biological_process	biological regulation|cellular process|metabolic process|positive regulation of biological process|regulation of biological process|response to stimulus|signaling	1	371	18	6672	0.643406	0.848633	0.999102	circRNA_1288|Chr11:10020678_10022991_+
GO:0043409	negative regulation of MAPK cascade	biological_process	biological regulation|cellular process|metabolic process|negative regulation of biological process|regulation of biological process|response to stimulus|signaling	1	371	45	6672	0.924475	0.968385	0.399641	circRNA_3663|Chr2:188308301_188309036_+
GO:0043410	positive regulation of MAPK cascade	biological_process	biological regulation|cellular process|metabolic process|positive regulation of biological process|regulation of biological process|response to stimulus|signaling	4	371	66	6672	0.504244	0.816973	1.08993	circRNA_3283|Chr19:61714402_61714542_+;circRNA_0447|Chr1:200606971_200615170_-;circRNA_3876|Chr20:4095939_4118506_+;circRNA_3670|Chr2:189226433_189230967_-
GO:0043425	bHLH transcription factor binding	molecular_function	binding	1	371	14	6672	0.551462	0.825583	1.28456	circRNA_6753|Chr9:18653895_18660843_+
GO:0043433	negative regulation of DNA binding transcription factor activity	biological_process	biological regulation|cellular process|metabolic process|negative regulation of biological process|regulation of biological process	1	371	31	6672	0.830968	0.917779	0.580123	circRNA_3216|Chr19:39543248_39545672_+
GO:0043434	response to peptide hormone	biological_process	response to stimulus	4	371	52	6672	0.327556	0.807299	1.38337	circRNA_6157|Chr7:116072198_116158807_-;circRNA_1147|Chr10:82752455_82752793_+;circRNA_3514|Chr2:113744312_113745181_+;circRNA_3670|Chr2:189226433_189230967_-
GO:0043473	pigmentation	biological_process	NA	1	371	37	6672	0.880294	0.94429	0.486049	circRNA_5232|Chr5:117620103_117623151_-
GO:0043484	regulation of RNA splicing	biological_process	biological regulation|cellular process|metabolic process|regulation of biological process	3	371	25	6672	0.159475	0.807299	2.15806	circRNA_2410|Chr15:105687771_105688392_+;circRNA_0568|Chr1:225195375_225196571_+;circRNA_3581|Chr2:150755405_150756431_+
GO:0043488	regulation of mRNA stability	biological_process	biological regulation|cellular process|metabolic process|negative regulation of biological process|regulation of biological process	2	371	18	6672	0.264453	0.807299	1.9982	circRNA_2258|Chr15:23840157_23853169_+;circRNA_5386|Chr5:150382262_150383814_-
GO:0043490	malate-aspartate shuttle	biological_process	cellular process|establishment of localization|localization|metabolic process	1	371	7	6672	0.330125	0.807299	2.56912	circRNA_4593|Chr4:31220330_31319352_+
GO:0043491	protein kinase B signaling	biological_process	biological regulation|cellular process|regulation of biological process|response to stimulus|signaling	1	371	12	6672	0.496977	0.810254	1.49865	circRNA_0647|Chr1:251455609_251485480_+
GO:0043497	regulation of protein heterodimerization activity	biological_process	biological regulation	1	371	9	6672	0.402631	0.807299	1.9982	circRNA_2562|Chr16:63915078_63933482_+
GO:0043507	positive regulation of JUN kinase activity	biological_process	biological regulation|cellular process|metabolic process|positive regulation of biological process|regulation of biological process|response to stimulus|signaling	1	371	26	6672	0.774711	0.894571	0.691686	circRNA_0038|Chr1:15545013_15551204_+
GO:0043508	negative regulation of JUN kinase activity	biological_process	biological regulation|cellular process|metabolic process|negative regulation of biological process|regulation of biological process|response to stimulus|signaling	1	371	7	6672	0.330125	0.807299	2.56912	circRNA_0758|Chr1:274628955_274647456_+
GO:0043518	negative regulation of DNA damage response, signal transduction by p53 class mediator	biological_process	biological regulation|cellular process|negative regulation of biological process|regulation of biological process|response to stimulus|signaling	2	371	15	6672	0.201552	0.807299	2.39784	circRNA_1346|Chr11:34865447_34879143_+;circRNA_1349|Chr11:34879058_34932316_+
GO:0043524	negative regulation of neuron apoptotic process	biological_process	biological regulation|cellular process|negative regulation of biological process|regulation of biological process	3	371	47	6672	0.489842	0.810254	1.1479	circRNA_4697|Chr4:66567829_66568912_-;circRNA_1315|Chr11:31974630_31979720_+;circRNA_5526|Chr6:11219826_11221789_-
GO:0043531	ADP binding	molecular_function	binding	1	371	10	6672	0.435893	0.807299	1.79838	circRNA_5526|Chr6:11219826_11221789_-
GO:0043542	endothelial cell migration	biological_process	cellular process|localization|locomotion|multicellular organismal process	2	371	22	6672	0.348137	0.807299	1.63489	circRNA_4508|Chr4:3972586_3976284_+;circRNA_0647|Chr1:251455609_251485480_+
GO:0043547	positive regulation of GTPase activity	biological_process	biological regulation	17	371	290	6672	0.446977	0.807299	1.05422	circRNA_1267|Chr10:109754906_109755050_+;circRNA_0617|Chr1:243014234_243018525_+;circRNA_1266|Chr10:109754888_109755050_+;circRNA_1064|Chr10:67497682_67503048_+;circRNA_4139|Chr3:45365578_45372679_+;circRNA_0290|Chr1:154405931_154425509_+;circRNA_6046|Chr7:64125692_64131186_-;circRNA_6781|Chr9:30155195_30155808_+;circRNA_0591|Chr1:233578229_233581182_+;circRNA_3283|Chr19:61714402_61714542_+;circR…
GO:0043565	sequence-specific DNA binding	molecular_function	binding	16	371	215	6672	0.142433	0.807299	1.33833	circRNA_0233|Chr1:128239552_128243030_-;circRNA_3087|Chr18:79813606_79815529_+;circRNA_1272|Chr10:110495072_110500097_+;circRNA_3203|Chr19:38057557_38062193_+;circRNA_3014|Chr18:61328528_61340634_+;circRNA_1231|Chr10:95327724_95328546_-;circRNA_0185|Chr1:93851663_93853240_-;circRNA_6103|Chr7:76114791_76119201_+;circRNA_0375|Chr1:177651557_177654228_+;circRNA_3010|Chr18:61323689_61328704_+;circRNA…
GO:0043588	skin development	biological_process	developmental process|multicellular organismal process	7	371	44	6672	0.010001	0.346714	2.86106	circRNA_6828|Chr9:52047552_52048745_+;circRNA_4051|Chr3:6464953_6472752_+;circRNA_6830|Chr9:52048089_52048881_+;circRNA_1147|Chr10:82752455_82752793_+;circRNA_6827|Chr9:52047552_52047844_+;circRNA_6825|Chr9:52043678_52045132_+;circRNA_0857|Chr10:13944932_13945211_+
GO:0043589	skin morphogenesis	biological_process	developmental process|multicellular organismal process	1	371	15	6672	0.576456	0.832613	1.19892	circRNA_1147|Chr10:82752455_82752793_+
GO:0043596	nuclear replication fork	cellular_component	cell|cell part|membrane-enclosed lumen|organelle|organelle part	1	371	7	6672	0.330125	0.807299	2.56912	circRNA_2259|Chr15:24024429_24032402_-
GO:0043621	protein self-association	molecular_function	binding	5	371	37	6672	0.052171	0.612665	2.43025	circRNA_6219|Chr7:130522030_130524289_+;circRNA_1346|Chr11:34865447_34879143_+;circRNA_3773|Chr2:225348168_225352508_-;circRNA_1349|Chr11:34879058_34932316_+;circRNA_4829|Chr4:131439626_131453028_-
GO:0043627	response to estrogen	biological_process	response to stimulus	3	371	34	6672	0.292687	0.807299	1.58681	circRNA_5945|Chr7:23546534_23546690_+;circRNA_6243|Chr7:140533891_140536242_-;circRNA_2849|Chr18:2445774_2446986_+
GO:0043631	RNA polyadenylation	biological_process	cellular process|metabolic process	2	371	10	6672	0.103274	0.787414	3.59677	circRNA_5840|Chr6:129621583_129636485_+;circRNA_5844|Chr6:129641475_129660096_+
GO:0043666	regulation of phosphoprotein phosphatase activity	biological_process	biological regulation|cellular process|metabolic process|regulation of biological process	3	371	28	6672	0.201934	0.807299	1.92684	circRNA_0763|Chr1:274700623_274701534_+;circRNA_0761|Chr1:274688579_274718538_+;circRNA_7033|Chr9:113534327_113535129_+
GO:0043679	axon terminus	cellular_component	cell|cell part|synapse|synapse part	1	371	26	6672	0.774711	0.894571	0.691686	circRNA_0728|Chr1:263249208_263253633_-
GO:0043966	histone H3 acetylation	biological_process	cellular component organization or biogenesis|cellular process|metabolic process	3	371	22	6672	0.120267	0.807299	2.45234	circRNA_6212|Chr7:129690245_129708614_-;circRNA_6211|Chr7:129678610_129680736_-;circRNA_1458|Chr11:84571220_84583542_-
GO:0043967	histone H4 acetylation	biological_process	cellular component organization or biogenesis|cellular process|metabolic process	1	371	14	6672	0.551462	0.825583	1.28456	circRNA_1679|Chr12:51960260_51961629_+
GO:0043968	histone H2A acetylation	biological_process	cellular component organization or biogenesis|cellular process|metabolic process	1	371	5	6672	0.248846	0.807299	3.59677	circRNA_1679|Chr12:51960260_51961629_+
GO:0043987	histone H3-S10 phosphorylation	biological_process	cellular component organization or biogenesis|cellular process|metabolic process	1	371	12	6672	0.496977	0.810254	1.49865	circRNA_5806|Chr6:124625936_124680274_-
GO:0043988	histone H3-S28 phosphorylation	biological_process	cellular component organization or biogenesis|cellular process|metabolic process	1	371	8	6672	0.367413	0.807299	2.24798	circRNA_5806|Chr6:124625936_124680274_-
GO:0043990	histone H2A-S1 phosphorylation	biological_process	cellular component organization or biogenesis|cellular process|metabolic process	1	371	8	6672	0.367413	0.807299	2.24798	circRNA_5806|Chr6:124625936_124680274_-
GO:0044030	regulation of DNA methylation	biological_process	biological regulation|cellular process|metabolic process|regulation of biological process	2	371	13	6672	0.160722	0.807299	2.76674	circRNA_6103|Chr7:76114791_76119201_+;circRNA_2278|Chr15:36934315_36940208_+
GO:0044183	protein binding involved in protein folding	molecular_function	binding	3	371	15	6672	0.0471303	0.612459	3.59677	circRNA_3885|Chr20:4896892_4921063_-;circRNA_6919|Chr9:71920586_71955010_+;circRNA_6917|Chr9:71915420_71927987_+
GO:0044212	transcription regulatory region DNA binding	molecular_function	binding	15	371	143	6672	0.0128306	0.398722	1.88642	circRNA_0233|Chr1:128239552_128243030_-;circRNA_3087|Chr18:79813606_79815529_+;circRNA_4669|Chr4:64894605_64899587_-;circRNA_3225|Chr19:42917629_42920390_-;circRNA_3014|Chr18:61328528_61340634_+;circRNA_0185|Chr1:93851663_93853240_-;circRNA_0375|Chr1:177651557_177654228_+;circRNA_6753|Chr9:18653895_18660843_+;circRNA_3010|Chr18:61323689_61328704_+;circRNA_6243|Chr7:140533891_140536242_-;circRNA_4…
GO:0044232	organelle membrane contact site	cellular_component	organelle|organelle part	1	371	6	6672	0.290646	0.807299	2.9973	circRNA_5902|Chr6:144189453_144275272_+
GO:0044255	cellular lipid metabolic process	biological_process	cellular process|metabolic process	1	371	8	6672	0.367413	0.807299	2.24798	circRNA_2599|Chr17:599906_610676_+
GO:0044291	cell-cell contact zone	cellular_component	cell junction	2	371	14	6672	0.180962	0.807299	2.56912	circRNA_4139|Chr3:45365578_45372679_+;circRNA_0568|Chr1:225195375_225196571_+
GO:0044295	axonal growth cone	cellular_component	cell|cell part	1	371	19	6672	0.663288	0.852917	0.946517	circRNA_2726|Chr17:54209230_54209739_+
GO:0044297	cell body	cellular_component	cell|cell part	9	371	53	6672	0.00231213	0.256981	3.05386	circRNA_4776|Chr4:115221467_115224878_-;circRNA_4403|Chr3:145092634_145129362_+;circRNA_4402|Chr3:145092634_145098350_+;circRNA_0649|Chr1:252537818_252539458_-;circRNA_3885|Chr20:4896892_4921063_-;circRNA_0591|Chr1:233578229_233581182_+;circRNA_1231|Chr10:95327724_95328546_-;circRNA_2562|Chr16:63915078_63933482_+;circRNA_0650|Chr1:252537894_252539495_+
GO:0044306	neuron projection terminus	cellular_component	cell|cell part	1	371	20	6672	0.682064	0.858756	0.899191	circRNA_4863|Chr4:151118221_151123637_-
GO:0044325	ion channel binding	molecular_function	binding	3	371	81	6672	0.836515	0.919804	0.666068	circRNA_4863|Chr4:151118221_151123637_-;circRNA_4712|Chr4:72054491_72089003_-;circRNA_0857|Chr10:13944932_13945211_+
GO:0044342	type B pancreatic cell proliferation	biological_process	NA	1	371	5	6672	0.248846	0.807299	3.59677	circRNA_2222|Chr15:3233141_3293913_-
GO:0044344	cellular response to fibroblast growth factor stimulus	biological_process	cellular process|response to stimulus	3	371	35	6672	0.308184	0.807299	1.54147	circRNA_1147|Chr10:82752455_82752793_+;circRNA_0447|Chr1:200606971_200615170_-;circRNA_6753|Chr9:18653895_18660843_+
GO:0044548	S100 protein binding	molecular_function	binding	1	371	10	6672	0.435893	0.807299	1.79838	circRNA_0568|Chr1:225195375_225196571_+
GO:0044666	MLL3/4 complex	cellular_component	cell|cell part|macromolecular complex|membrane-enclosed lumen|organelle|organelle part	3	371	13	6672	0.0321534	0.531828	4.15011	circRNA_4508|Chr4:3972586_3976284_+;circRNA_6243|Chr7:140533891_140536242_-;circRNA_7065|ChrX:4819220_4832241_-
GO:0044691	tooth eruption	biological_process	developmental process|multicellular organismal process	1	371	16	6672	0.60006	0.842385	1.12399	circRNA_1147|Chr10:82752455_82752793_+
GO:0044727	DNA demethylation of male pronucleus	biological_process	cellular process|developmental process|metabolic process|multicellular organismal process	2	371	5	6672	0.0275678	0.495978	7.19353	circRNA_4773|Chr4:115104274_115142108_-;circRNA_4771|Chr4:115104274_115106424_-
GO:0044798	nuclear transcription factor complex	cellular_component	cell|cell part|macromolecular complex|organelle|organelle part	1	371	8	6672	0.367413	0.807299	2.24798	circRNA_3203|Chr19:38057557_38062193_+
GO:0044877	protein-containing complex binding	molecular_function	binding	7	371	239	6672	0.982294	0.991479	0.526723	circRNA_4330|Chr3:117726599_117728604_-;circRNA_0591|Chr1:233578229_233581182_+;circRNA_3283|Chr19:61714402_61714542_+;circRNA_3733|Chr2:208198684_208203924_-;circRNA_6894|Chr9:67242046_67257543_+;circRNA_4448|Chr3:156690910_156699465_+;circRNA_6658|Chr8:118616528_118620855_+
GO:0045053	protein retention in Golgi apparatus	biological_process	biological regulation|cellular process|localization	1	371	13	6672	0.524998	0.816973	1.38337	circRNA_0594|Chr1:235750193_235761819_-
GO:0045056	transcytosis	biological_process	establishment of localization|localization	2	371	14	6672	0.180962	0.807299	2.56912	circRNA_0290|Chr1:154405931_154425509_+;circRNA_1983|Chr14:17407714_17408515_-
GO:0045087	innate immune response	biological_process	immune system process|response to stimulus	1	371	78	6672	0.98877	0.99508	0.230562	circRNA_2937|Chr18:29457228_29457626_+
GO:0045095	keratin filament	cellular_component	cell|cell part|organelle|organelle part	3	371	12	6672	0.0257724	0.495978	4.49596	circRNA_6256|Chr7:143274109_143324536_-;circRNA_6258|Chr7:143316920_143324536_-;circRNA_1185|Chr10:88046855_88047023_+
GO:0045109	intermediate filament organization	biological_process	cellular component organization or biogenesis|cellular process	2	371	9	6672	0.0856728	0.732146	3.99641	circRNA_6953|Chr9:82558343_82558587_+;circRNA_6952|Chr9:82557123_82558587_+
GO:0045111	intermediate filament cytoskeleton	cellular_component	cell|cell part|organelle	2	371	43	6672	0.699251	0.864628	0.836457	circRNA_6953|Chr9:82558343_82558587_+;circRNA_6952|Chr9:82557123_82558587_+
GO:0045121	membrane raft	cellular_component	membrane|membrane part	8	371	153	6672	0.623229	0.848203	0.940331	circRNA_1547|Chr12:13717791_13718009_-;circRNA_3283|Chr19:61714402_61714542_+;circRNA_5986|Chr7:41167312_41167751_+;circRNA_0568|Chr1:225195375_225196571_+;circRNA_5987|Chr7:41167312_41178782_+;circRNA_6919|Chr9:71920586_71955010_+;circRNA_0716|Chr1:259479327_259489683_-;circRNA_6917|Chr9:71915420_71927987_+
GO:0045162	clustering of voltage-gated sodium channels	biological_process	cellular component organization or biogenesis|cellular process|developmental process|multicellular organismal process	1	371	11	6672	0.467307	0.807299	1.63489	circRNA_3556|Chr2:128642780_128668115_-
GO:0045165	cell fate commitment	biological_process	cellular process|developmental process	3	371	32	6672	0.261888	0.807299	1.68598	circRNA_0447|Chr1:200606971_200615170_-;circRNA_2849|Chr18:2445774_2446986_+;circRNA_3057|Chr18:72593000_72595275_+
GO:0045171	intercellular bridge	cellular_component	extracellular region|extracellular region part	3	371	18	6672	0.0748262	0.706419	2.9973	circRNA_3745|Chr2:210808354_210822401_-;circRNA_3744|Chr2:210806416_210806638_+;circRNA_3738|Chr2:210723584_210806489_-
GO:0045176	apical protein localization	biological_process	localization	1	371	15	6672	0.576456	0.832613	1.19892	circRNA_2439|Chr16:2354385_2354582_-
GO:0045177	apical part of cell	cellular_component	cell|cell part	4	371	63	6672	0.467612	0.807299	1.14183	circRNA_5986|Chr7:41167312_41167751_+;circRNA_7047|Chr9:119309035_119311107_-;circRNA_5987|Chr7:41167312_41178782_+;circRNA_2562|Chr16:63915078_63933482_+
GO:0045178	basal part of cell	cellular_component	cell|cell part	1	371	10	6672	0.435893	0.807299	1.79838	circRNA_2562|Chr16:63915078_63933482_+
GO:0045190	isotype switching	biological_process	cellular process|developmental process|immune system process|metabolic process|multicellular organismal process|response to stimulus	1	371	6	6672	0.290646	0.807299	2.9973	circRNA_5526|Chr6:11219826_11221789_-
GO:0045197	establishment or maintenance of epithelial cell apical/basal polarity	biological_process	cellular process	1	371	18	6672	0.643406	0.848633	0.999102	circRNA_2439|Chr16:2354385_2354582_-
GO:0045198	establishment of epithelial cell apical/basal polarity	biological_process	cellular process|developmental process	1	371	20	6672	0.682064	0.858756	0.899191	circRNA_6415|Chr8:64635064_64648503_+
GO:0045200	establishment of neuroblast polarity	biological_process	cellular process|developmental process|multicellular organismal process	1	371	8	6672	0.367413	0.807299	2.24798	circRNA_5232|Chr5:117620103_117623151_-
GO:0045202	synapse	cellular_component	NA	10	371	188	6672	0.604807	0.846152	0.956587	circRNA_6219|Chr7:130522030_130524289_+;circRNA_0290|Chr1:154405931_154425509_+;circRNA_3791|Chr2:227687641_227700240_+;circRNA_3283|Chr19:61714402_61714542_+;circRNA_2258|Chr15:23840157_23853169_+;circRNA_1315|Chr11:31974630_31979720_+;circRNA_2562|Chr16:63915078_63933482_+;circRNA_5589|Chr6:28022406_28084649_+;circRNA_0011|Chr1:6601452_6613874_-;circRNA_5588|Chr6:28022406_28051704_+
GO:0045211	postsynaptic membrane	cellular_component	cell|cell part|membrane|membrane part|synapse|synapse part	8	371	108	6672	0.251538	0.807299	1.33214	circRNA_4863|Chr4:151118221_151123637_-;circRNA_6219|Chr7:130522030_130524289_+;circRNA_4403|Chr3:145092634_145129362_+;circRNA_4402|Chr3:145092634_145098350_+;circRNA_0290|Chr1:154405931_154425509_+;circRNA_3283|Chr19:61714402_61714542_+;circRNA_0011|Chr1:6601452_6613874_-;circRNA_0647|Chr1:251455609_251485480_+
GO:0045213	neurotransmitter receptor metabolic process	biological_process	cellular process|metabolic process	1	371	11	6672	0.467307	0.807299	1.63489	circRNA_2562|Chr16:63915078_63933482_+
GO:0045214	sarcomere organization	biological_process	cellular component organization or biogenesis|cellular process|developmental process	3	371	21	6672	0.108099	0.801999	2.56912	circRNA_1738|Chr13:52667988_52673721_+;circRNA_3283|Chr19:61714402_61714542_+;circRNA_4829|Chr4:131439626_131453028_-
GO:0045216	cell-cell junction organization	biological_process	cellular component organization or biogenesis|cellular process	1	371	17	6672	0.622353	0.847573	1.05787	circRNA_3373|Chr2:30564530_30566431_-
GO:0045296	cadherin binding	molecular_function	binding	14	371	222	6672	0.351845	0.807299	1.13412	circRNA_1255|Chr10:106264856_106265494_+;circRNA_2378|Chr15:70098761_70139170_-;circRNA_4658|Chr4:62270233_62272586_+;circRNA_5902|Chr6:144189453_144275272_+;circRNA_0290|Chr1:154405931_154425509_+;circRNA_2375|Chr15:70077466_70105489_-;circRNA_3283|Chr19:61714402_61714542_+;circRNA_3620|Chr2:183555214_183558410_-;circRNA_0568|Chr1:225195375_225196571_+;circRNA_5414|Chr5:157690578_157712883_+;cir…
GO:0045332	phospholipid translocation	biological_process	biological regulation|cellular component organization or biogenesis|cellular process|establishment of localization|localization	2	371	32	6672	0.538235	0.825583	1.12399	circRNA_3080|Chr18:77484239_77520779_-;circRNA_3074|Chr18:77466020_77520779_-
GO:0045333	cellular respiration	biological_process	cellular process|metabolic process	2	371	12	6672	0.140942	0.807299	2.9973	circRNA_4593|Chr4:31220330_31319352_+;circRNA_3203|Chr19:38057557_38062193_+
GO:0045335	phagocytic vesicle	cellular_component	cell|cell part|organelle	2	371	49	6672	0.765653	0.892754	0.734034	circRNA_3733|Chr2:208198684_208203924_-;circRNA_2726|Chr17:54209230_54209739_+
GO:0045340	mercury ion binding	molecular_function	binding	2	371	7	6672	0.0537688	0.612665	5.13824	circRNA_6937|Chr9:78945266_78947892_-;circRNA_6935|Chr9:78911759_78911926_+
GO:0045444	fat cell differentiation	biological_process	cellular process|developmental process	2	371	53	6672	0.802525	0.909883	0.678635	circRNA_4795|Chr4:117422680_117436312_+;circRNA_3458|Chr2:57539193_57544062_-
GO:0045445	myoblast differentiation	biological_process	cellular process|developmental process	1	371	7	6672	0.330125	0.807299	2.56912	circRNA_3581|Chr2:150755405_150756431_+
GO:0045454	cell redox homeostasis	biological_process	biological regulation|cellular process|regulation of biological process	1	371	23	6672	0.732356	0.878053	0.781906	circRNA_0768|Chr1:277379316_277383623_+
GO:0045471	response to ethanol	biological_process	response to stimulus	5	371	64	6672	0.282729	0.807299	1.40499	circRNA_3745|Chr2:210808354_210822401_-;circRNA_3744|Chr2:210806416_210806638_+;circRNA_0447|Chr1:200606971_200615170_-;circRNA_0647|Chr1:251455609_251485480_+;circRNA_3670|Chr2:189226433_189230967_-
GO:0045475	locomotor rhythm	biological_process	rhythmic process	1	371	12	6672	0.496977	0.810254	1.49865	circRNA_0647|Chr1:251455609_251485480_+
GO:0045485	omega-6 fatty acid desaturase activity	molecular_function	catalytic activity	1	371	5	6672	0.248846	0.807299	3.59677	circRNA_0576|Chr1:226119298_226139368_-
GO:0045499	chemorepellent activity	molecular_function	binding|receptor regulator activity	1	371	10	6672	0.435893	0.807299	1.79838	circRNA_2562|Chr16:63915078_63933482_+
GO:0045577	regulation of B cell differentiation	biological_process	biological regulation|cellular process|developmental process|immune system process|multicellular organismal process|regulation of biological process	1	371	7	6672	0.330125	0.807299	2.56912	circRNA_2493|Chr16:19805426_19805902_+
GO:0045595	regulation of cell differentiation	biological_process	biological regulation|cellular process|developmental process|regulation of biological process	2	371	14	6672	0.180962	0.807299	2.56912	circRNA_2562|Chr16:63915078_63933482_+;circRNA_6753|Chr9:18653895_18660843_+
GO:0045596	negative regulation of cell differentiation	biological_process	biological regulation|cellular process|developmental process|negative regulation of biological process|regulation of biological process	2	371	11	6672	0.121747	0.807299	3.26979	circRNA_3283|Chr19:61714402_61714542_+;circRNA_1063|Chr10:67363508_67364610_+
GO:0045597	positive regulation of cell differentiation	biological_process	biological regulation|cellular process|developmental process|positive regulation of biological process|regulation of biological process	1	371	15	6672	0.576456	0.832613	1.19892	circRNA_3152|Chr19:32214551_32215127_+
GO:0045598	regulation of fat cell differentiation	biological_process	biological regulation|cellular process|developmental process|regulation of biological process	2	371	11	6672	0.121747	0.807299	3.26979	circRNA_4795|Chr4:117422680_117436312_+;circRNA_5617|Chr6:41822551_41830656_-
GO:0045599	negative regulation of fat cell differentiation	biological_process	biological regulation|cellular process|developmental process|negative regulation of biological process|regulation of biological process	2	371	23	6672	0.368635	0.807299	1.56381	circRNA_4413|Chr3:148837814_148842440_+;circRNA_4416|Chr3:148837814_148862118_+
GO:0045600	positive regulation of fat cell differentiation	biological_process	biological regulation|cellular process|developmental process|positive regulation of biological process|regulation of biological process	1	371	42	6672	0.91023	0.961815	0.428186	circRNA_3509|Chr2:113189774_113198013_-
GO:0045634	regulation of melanocyte differentiation	biological_process	biological regulation|cellular process|developmental process|regulation of biological process	1	371	5	6672	0.248846	0.807299	3.59677	circRNA_0591|Chr1:233578229_233581182_+
GO:0045648	positive regulation of erythrocyte differentiation	biological_process	biological regulation|cellular process|developmental process|immune system process|multicellular organismal process|positive regulation of biological process|regulation of biological process	1	371	16	6672	0.60006	0.842385	1.12399	circRNA_6781|Chr9:30155195_30155808_+
GO:0045663	positive regulation of myoblast differentiation	biological_process	biological regulation|cellular process|developmental process|positive regulation of biological process|regulation of biological process	3	371	17	6672	0.0649315	0.671779	3.17362	circRNA_3225|Chr19:42917629_42920390_-;circRNA_0038|Chr1:15545013_15551204_+;circRNA_3223|Chr19:42856166_42920390_-
GO:0045664	regulation of neuron differentiation	biological_process	biological regulation|cellular process|developmental process|multicellular organismal process|regulation of biological process	2	371	28	6672	0.466633	0.807299	1.28456	circRNA_3225|Chr19:42917629_42920390_-;circRNA_3223|Chr19:42856166_42920390_-
GO:0045665	negative regulation of neuron differentiation	biological_process	biological regulation|cellular process|developmental process|multicellular organismal process|negative regulation of biological process|regulation of biological process	3	371	60	6672	0.656562	0.852917	0.899191	circRNA_3283|Chr19:61714402_61714542_+;circRNA_0185|Chr1:93851663_93853240_-;circRNA_2847|Chr18:2018381_2018553_-
GO:0045666	positive regulation of neuron differentiation	biological_process	biological regulation|cellular process|developmental process|multicellular organismal process|positive regulation of biological process|regulation of biological process	3	371	55	6672	0.597342	0.842385	0.980936	circRNA_3283|Chr19:61714402_61714542_+;circRNA_5163|Chr5:90817794_90827570_+;circRNA_0647|Chr1:251455609_251485480_+
GO:0045667	regulation of osteoblast differentiation	biological_process	biological regulation|cellular process|developmental process|multicellular organismal process|regulation of biological process	1	371	19	6672	0.663288	0.852917	0.946517	circRNA_6753|Chr9:18653895_18660843_+
GO:0045668	negative regulation of osteoblast differentiation	biological_process	biological regulation|cellular process|developmental process|multicellular organismal process|negative regulation of biological process|regulation of biological process	2	371	17	6672	0.243383	0.807299	2.11574	circRNA_1818|Chr13:77863217_77865781_-;circRNA_3509|Chr2:113189774_113198013_-
GO:0045669	positive regulation of osteoblast differentiation	biological_process	biological regulation|cellular process|developmental process|multicellular organismal process|positive regulation of biological process|regulation of biological process	2	371	23	6672	0.368635	0.807299	1.56381	circRNA_6753|Chr9:18653895_18660843_+;circRNA_3152|Chr19:32214551_32215127_+
GO:0045671	negative regulation of osteoclast differentiation	biological_process	biological regulation|cellular process|developmental process|immune system process|multicellular organismal process|negative regulation of biological process|regulation of biological process	1	371	16	6672	0.60006	0.842385	1.12399	circRNA_4330|Chr3:117726599_117728604_-
GO:0045725	positive regulation of glycogen biosynthetic process	biological_process	biological regulation|cellular process|metabolic process|positive regulation of biological process|regulation of biological process	1	371	35	6672	0.865698	0.93499	0.513824	circRNA_0716|Chr1:259479327_259489683_-
GO:0045727	positive regulation of translation	biological_process	biological regulation|cellular process|metabolic process|positive regulation of biological process|regulation of biological process	7	371	48	6672	0.015898	0.423465	2.62264	circRNA_0432|Chr1:197981834_197983786_-;circRNA_0433|Chr1:197981834_197983858_-;circRNA_0544|Chr1:220039308_220042767_-;circRNA_0547|Chr1:220042074_220049075_-;circRNA_2258|Chr15:23840157_23853169_+;circRNA_0543|Chr1:220039308_220040146_-;circRNA_5413|Chr5:156506448_156517254_+
GO:0045732	positive regulation of protein catabolic process	biological_process	biological regulation|metabolic process|positive regulation of biological process|regulation of biological process	1	371	47	6672	0.932695	0.971537	0.382635	circRNA_3216|Chr19:39543248_39545672_+
GO:0045739	positive regulation of DNA repair	biological_process	biological regulation|cellular process|metabolic process|positive regulation of biological process|regulation of biological process|response to stimulus	1	371	30	6672	0.820968	0.913126	0.599461	circRNA_2472|Chr16:8396763_8400882_+
GO:0045747	positive regulation of Notch signaling pathway	biological_process	biological regulation|cellular process|positive regulation of biological process|regulation of biological process|response to stimulus|signaling	1	371	12	6672	0.496977	0.810254	1.49865	circRNA_6169|Chr7:119987740_119990307_-
GO:0045766	positive regulation of angiogenesis	biological_process	biological regulation|developmental process|multicellular organismal process|positive regulation of biological process|regulation of biological process	3	371	48	6672	0.504058	0.816973	1.12399	circRNA_4697|Chr4:66567829_66568912_-;circRNA_3283|Chr19:61714402_61714542_+;circRNA_2849|Chr18:2445774_2446986_+
GO:0045773	positive regulation of axon extension	biological_process	biological regulation|cellular component organization or biogenesis|cellular process|developmental process|growth|multicellular organismal process|positive regulation of biological process|regulation of biological process	3	371	37	6672	0.339237	0.807299	1.45815	circRNA_6937|Chr9:78945266_78947892_-;circRNA_6935|Chr9:78911759_78911926_+;circRNA_2562|Chr16:63915078_63933482_+
GO:0045778	positive regulation of ossification	biological_process	biological regulation|multicellular organismal process|positive regulation of biological process|regulation of biological process	2	371	12	6672	0.140942	0.807299	2.9973	circRNA_3458|Chr2:57539193_57544062_-;circRNA_6753|Chr9:18653895_18660843_+
GO:0045785	positive regulation of cell adhesion	biological_process	biological adhesion|biological regulation|positive regulation of biological process|regulation of biological process	1	371	31	6672	0.830968	0.917779	0.580123	circRNA_2562|Chr16:63915078_63933482_+
GO:0045787	positive regulation of cell cycle	biological_process	biological regulation|cellular process|positive regulation of biological process|regulation of biological process	2	371	24	6672	0.388875	0.807299	1.49865	circRNA_0447|Chr1:200606971_200615170_-;circRNA_3899|Chr20:6883690_6884511_+
GO:0045792	negative regulation of cell size	biological_process	biological regulation|cellular component organization or biogenesis|cellular process	1	371	10	6672	0.435893	0.807299	1.79838	circRNA_0647|Chr1:251455609_251485480_+
GO:0045794	negative regulation of cell volume	biological_process	biological regulation|cellular component organization or biogenesis|cellular process	1	371	18	6672	0.643406	0.848633	0.999102	circRNA_6219|Chr7:130522030_130524289_+
GO:0045807	positive regulation of endocytosis	biological_process	biological regulation|cellular component organization or biogenesis|cellular process|establishment of localization|localization|positive regulation of biological process|regulation of biological process	2	371	24	6672	0.388875	0.807299	1.49865	circRNA_3283|Chr19:61714402_61714542_+;circRNA_2847|Chr18:2018381_2018553_-
GO:0045839	negative regulation of mitotic nuclear division	biological_process	biological regulation|cellular component organization or biogenesis|cellular process|negative regulation of biological process|regulation of biological process	1	371	8	6672	0.367413	0.807299	2.24798	circRNA_0447|Chr1:200606971_200615170_-
GO:0045860	positive regulation of protein kinase activity	biological_process	biological regulation|cellular process|metabolic process|positive regulation of biological process|regulation of biological process	2	371	31	6672	0.520964	0.816973	1.16025	circRNA_3733|Chr2:208198684_208203924_-;circRNA_2562|Chr16:63915078_63933482_+
GO:0045861	negative regulation of proteolysis	biological_process	biological regulation|cellular process|metabolic process|negative regulation of biological process|regulation of biological process	1	371	9	6672	0.402631	0.807299	1.9982	circRNA_5945|Chr7:23546534_23546690_+
GO:0045879	negative regulation of smoothened signaling pathway	biological_process	biological regulation|cellular process|negative regulation of biological process|regulation of biological process|response to stimulus|signaling	1	371	14	6672	0.551462	0.825583	1.28456	circRNA_6753|Chr9:18653895_18660843_+
GO:0045880	positive regulation of smoothened signaling pathway	biological_process	biological regulation|cellular process|positive regulation of biological process|regulation of biological process|response to stimulus|signaling	1	371	13	6672	0.524998	0.816973	1.38337	circRNA_0225|Chr1:127025462_127025957_+
GO:0045892	negative regulation of transcription, DNA-templated	biological_process	biological regulation|cellular process|metabolic process|negative regulation of biological process|regulation of biological process	17	371	288	6672	0.435371	0.807299	1.06155	circRNA_4186|Chr3:59678949_59680308_-;circRNA_3225|Chr19:42917629_42920390_-;circRNA_5806|Chr6:124625936_124680274_-;circRNA_3458|Chr2:57539193_57544062_-;circRNA_4927|Chr4:170518672_170520365_+;circRNA_2562|Chr16:63915078_63933482_+;circRNA_6753|Chr9:18653895_18660843_+;circRNA_3216|Chr19:39543248_39545672_+;circRNA_4750|Chr4:96739878_96745521_+;circRNA_4829|Chr4:131439626_131453028_-;circRNA_32…
GO:0045893	positive regulation of transcription, DNA-templated	biological_process	biological regulation|cellular process|metabolic process|positive regulation of biological process|regulation of biological process	30	371	367	6672	0.0206426	0.486644	1.47007	circRNA_0233|Chr1:128239552_128243030_-;circRNA_3087|Chr18:79813606_79815529_+;circRNA_2943|Chr18:31445709_31446694_-;circRNA_2865|Chr18:6047215_6051719_-;circRNA_4669|Chr4:64894605_64899587_-;circRNA_4186|Chr3:59678949_59680308_-;circRNA_4697|Chr4:66567829_66568912_-;circRNA_1147|Chr10:82752455_82752793_+;circRNA_6915|Chr9:70787138_70787910_-;circRNA_3225|Chr19:42917629_42920390_-;circRNA_3257|C…
GO:0045910	negative regulation of DNA recombination	biological_process	biological regulation|cellular process|metabolic process|negative regulation of biological process|regulation of biological process	1	371	6	6672	0.290646	0.807299	2.9973	circRNA_5526|Chr6:11219826_11221789_-
GO:0045944	positive regulation of transcription by RNA polymerase II	biological_process	biological regulation|cellular process|metabolic process|positive regulation of biological process|regulation of biological process	35	371	600	6672	0.407544	0.807299	1.04906	circRNA_0233|Chr1:128239552_128243030_-;circRNA_2865|Chr18:6047215_6051719_-;circRNA_4669|Chr4:64894605_64899587_-;circRNA_4186|Chr3:59678949_59680308_-;circRNA_4697|Chr4:66567829_66568912_-;circRNA_6915|Chr9:70787138_70787910_-;circRNA_6275|Chr8:12160079_12161683_+;circRNA_1272|Chr10:110495072_110500097_+;circRNA_3203|Chr19:38057557_38062193_+;circRNA_4773|Chr4:115104274_115142108_-;circRNA_5806…
GO:0045947	negative regulation of translational initiation	biological_process	biological regulation|cellular process|metabolic process|negative regulation of biological process|regulation of biological process	3	371	7	6672	0.00504645	0.272375	7.70735	circRNA_0544|Chr1:220039308_220042767_-;circRNA_0547|Chr1:220042074_220049075_-;circRNA_0543|Chr1:220039308_220040146_-
GO:0045995	regulation of embryonic development	biological_process	biological regulation|developmental process|multicellular organismal process|regulation of biological process	1	371	11	6672	0.467307	0.807299	1.63489	circRNA_3458|Chr2:57539193_57544062_-
GO:0046326	positive regulation of glucose import	biological_process	biological regulation|establishment of localization|localization|positive regulation of biological process|regulation of biological process	3	371	47	6672	0.489842	0.810254	1.1479	circRNA_0233|Chr1:128239552_128243030_-;circRNA_3733|Chr2:208198684_208203924_-;circRNA_0716|Chr1:259479327_259489683_-
GO:0046330	positive regulation of JNK cascade	biological_process	biological regulation|cellular process|metabolic process|positive regulation of biological process|regulation of biological process|response to stimulus|signaling	2	371	45	6672	0.722957	0.877387	0.799281	circRNA_4697|Chr4:66567829_66568912_-;circRNA_0038|Chr1:15545013_15551204_+
GO:0046332	SMAD binding	molecular_function	binding	7	371	78	6672	0.141622	0.807299	1.61393	circRNA_6828|Chr9:52047552_52048745_+;circRNA_0233|Chr1:128239552_128243030_-;circRNA_6830|Chr9:52048089_52048881_+;circRNA_4697|Chr4:66567829_66568912_-;circRNA_6827|Chr9:52047552_52047844_+;circRNA_6825|Chr9:52043678_52045132_+;circRNA_3057|Chr18:72593000_72595275_+
GO:0046426	negative regulation of JAK-STAT cascade	biological_process	biological regulation|cellular process|negative regulation of biological process|regulation of biological process|response to stimulus|signaling	1	371	13	6672	0.524998	0.816973	1.38337	circRNA_7247|ChrX:157322637_157323315_+
GO:0046540	U4/U6 x U5 tri-snRNP complex	cellular_component	cell|cell part|macromolecular complex|organelle|organelle part	1	371	7	6672	0.330125	0.807299	2.56912	circRNA_4735|Chr4:87017858_87018778_-
GO:0046548	retinal rod cell development	biological_process	cellular process|developmental process|multicellular organismal process	1	371	7	6672	0.330125	0.807299	2.56912	circRNA_4795|Chr4:117422680_117436312_+
GO:0046579	positive regulation of Ras protein signal transduction	biological_process	biological regulation|cellular process|positive regulation of biological process|regulation of biological process|response to stimulus|signaling	3	371	16	6672	0.0556899	0.624153	3.37197	circRNA_0763|Chr1:274700623_274701534_+;circRNA_0761|Chr1:274688579_274718538_+;circRNA_2562|Chr16:63915078_63933482_+
GO:0046620	regulation of organ growth	biological_process	biological regulation|developmental process|growth|multicellular organismal process|regulation of biological process	1	371	8	6672	0.367413	0.807299	2.24798	circRNA_4863|Chr4:151118221_151123637_-
GO:0046621	negative regulation of organ growth	biological_process	biological regulation|developmental process|growth|multicellular organismal process|negative regulation of biological process|regulation of biological process	1	371	30	6672	0.820968	0.913126	0.599461	circRNA_0647|Chr1:251455609_251485480_+
GO:0046626	regulation of insulin receptor signaling pathway	biological_process	biological regulation|cellular process|regulation of biological process|response to stimulus|signaling	3	371	13	6672	0.0321534	0.531828	4.15011	circRNA_0544|Chr1:220039308_220042767_-;circRNA_0547|Chr1:220042074_220049075_-;circRNA_0543|Chr1:220039308_220040146_-
GO:0046627	negative regulation of insulin receptor signaling pathway	biological_process	biological regulation|cellular process|negative regulation of biological process|regulation of biological process|response to stimulus|signaling	1	371	14	6672	0.551462	0.825583	1.28456	circRNA_4461|Chr3:161474539_161487731_-
GO:0046677	response to antibiotic	biological_process	response to stimulus	3	371	14	6672	0.0392779	0.559784	3.85368	circRNA_3745|Chr2:210808354_210822401_-;circRNA_3744|Chr2:210806416_210806638_+;circRNA_2985|Chr18:51805551_51807909_+
GO:0046685	response to arsenic-containing substance	biological_process	response to stimulus	4	371	23	6672	0.0359722	0.559784	3.12762	circRNA_0544|Chr1:220039308_220042767_-;circRNA_0547|Chr1:220042074_220049075_-;circRNA_0647|Chr1:251455609_251485480_+;circRNA_0543|Chr1:220039308_220040146_-
GO:0046686	response to cadmium ion	biological_process	response to stimulus	1	371	12	6672	0.496977	0.810254	1.49865	circRNA_0728|Chr1:263249208_263253633_-
GO:0046697	decidualization	biological_process	developmental process|multicellular organismal process|multi-organism process|reproduction|reproductive process	1	371	28	6672	0.799163	0.907577	0.64228	circRNA_3663|Chr2:188308301_188309036_+
GO:0046718	viral entry into host cell	biological_process	multi-organism process	1	371	20	6672	0.682064	0.858756	0.899191	circRNA_1249|Chr10:103586432_103677527_-
GO:0046777	protein autophosphorylation	biological_process	cellular process|metabolic process	4	371	149	6672	0.969895	0.984873	0.482787	circRNA_6391|Chr8:60917720_60920949_-;circRNA_1346|Chr11:34865447_34879143_+;circRNA_0447|Chr1:200606971_200615170_-;circRNA_1349|Chr11:34879058_34932316_+
GO:0046822	regulation of nucleocytoplasmic transport	biological_process	biological regulation|establishment of localization|localization|regulation of biological process	4	371	16	6672	0.0100385	0.346714	4.49596	circRNA_0544|Chr1:220039308_220042767_-;circRNA_0547|Chr1:220042074_220049075_-;circRNA_6001|Chr7:51425330_51432888_-;circRNA_0543|Chr1:220039308_220040146_-
GO:0046835	carbohydrate phosphorylation	biological_process	cellular process|metabolic process	1	371	11	6672	0.467307	0.807299	1.63489	circRNA_2222|Chr15:3233141_3293913_-
GO:0046847	filopodium assembly	biological_process	cellular component organization or biogenesis|cellular process	1	371	11	6672	0.467307	0.807299	1.63489	circRNA_2304|Chr15:41008529_41011344_+
GO:0046854	phosphatidylinositol phosphorylation	biological_process	cellular process|metabolic process	3	371	42	6672	0.416079	0.807299	1.28456	circRNA_4523|Chr4:7700000_7706702_+;circRNA_6919|Chr9:71920586_71955010_+;circRNA_6917|Chr9:71915420_71927987_+
GO:0046855	inositol phosphate dephosphorylation	biological_process	cellular process|metabolic process	1	371	9	6672	0.402631	0.807299	1.9982	circRNA_0647|Chr1:251455609_251485480_+
GO:0046856	phosphatidylinositol dephosphorylation	biological_process	cellular process|metabolic process	2	371	23	6672	0.368635	0.807299	1.56381	circRNA_2831|Chr18:301858_306376_-;circRNA_0647|Chr1:251455609_251485480_+
GO:0046872	metal ion binding	molecular_function	binding	46	371	796	6672	0.412236	0.807299	1.03927	circRNA_6828|Chr9:52047552_52048745_+;circRNA_2299|Chr15:38661026_38709984_-;circRNA_4863|Chr4:151118221_151123637_-;circRNA_2887|Chr18:15480332_15494701_+;circRNA_2146|Chr14:88724076_88725530_-;circRNA_2943|Chr18:31445709_31446694_-;circRNA_6830|Chr9:52048089_52048881_+;circRNA_2360|Chr15:57348405_57351717_+;circRNA_1147|Chr10:82752455_82752793_+;circRNA_1064|Chr10:67497682_67503048_+;circRNA_19…
GO:0046889	positive regulation of lipid biosynthetic process	biological_process	biological regulation|metabolic process|positive regulation of biological process|regulation of biological process	1	371	32	6672	0.840411	0.919804	0.561995	circRNA_0716|Chr1:259479327_259489683_-
GO:0046975	histone methyltransferase activity (H3-K36 specific)	molecular_function	catalytic activity	1	371	36	6672	0.873205	0.939635	0.499551	circRNA_3663|Chr2:188308301_188309036_+
GO:0046976	histone methyltransferase activity (H3-K27 specific)	molecular_function	catalytic activity	1	371	15	6672	0.576456	0.832613	1.19892	circRNA_1063|Chr10:67363508_67364610_+
GO:0046982	protein heterodimerization activity	molecular_function	binding	10	371	268	6672	0.93634	0.973979	0.671038	circRNA_3745|Chr2:210808354_210822401_-;circRNA_3744|Chr2:210806416_210806638_+;circRNA_0233|Chr1:128239552_128243030_-;circRNA_3283|Chr19:61714402_61714542_+;circRNA_4853|Chr4:147948449_147949383_-;circRNA_6934|Chr9:78341845_78350281_-;circRNA_0375|Chr1:177651557_177654228_+;circRNA_4829|Chr4:131439626_131453028_-;circRNA_3152|Chr19:32214551_32215127_+;circRNA_3057|Chr18:72593000_72595275_+
GO:0046983	protein dimerization activity	molecular_function	binding	3	371	65	6672	0.709269	0.871665	0.830023	circRNA_3844|Chr2:256682926_256683075_+;circRNA_0233|Chr1:128239552_128243030_-;circRNA_3842|Chr2:256669855_256683075_+
GO:0047391	alkylglycerophosphoethanolamine phosphodiesterase activity	molecular_function	catalytic activity	1	371	11	6672	0.467307	0.807299	1.63489	circRNA_0591|Chr1:233578229_233581182_+
GO:0047485	protein N-terminus binding	molecular_function	binding	1	371	63	6672	0.973262	0.98722	0.285458	circRNA_3458|Chr2:57539193_57544062_-
GO:0047496	vesicle transport along microtubule	biological_process	cellular process|establishment of localization|localization	1	371	16	6672	0.60006	0.842385	1.12399	circRNA_2726|Chr17:54209230_54209739_+
GO:0048007	antigen processing and presentation, exogenous lipid antigen via MHC class Ib	biological_process	immune system process	1	371	13	6672	0.524998	0.816973	1.38337	circRNA_3332|Chr2:24067948_24083767_+
GO:0048008	platelet-derived growth factor receptor signaling pathway	biological_process	biological regulation|cellular process|regulation of biological process|response to stimulus|signaling	1	371	31	6672	0.830968	0.917779	0.580123	circRNA_0647|Chr1:251455609_251485480_+
GO:0048013	ephrin receptor signaling pathway	biological_process	biological regulation|cellular process|regulation of biological process|response to stimulus|signaling	1	371	28	6672	0.799163	0.907577	0.64228	circRNA_2865|Chr18:6047215_6051719_-
GO:0048016	inositol phosphate-mediated signaling	biological_process	biological regulation|cellular process|regulation of biological process|response to stimulus|signaling	1	371	6	6672	0.290646	0.807299	2.9973	circRNA_4948|Chr4:180711145_180722357_-
GO:0048017	inositol lipid-mediated signaling	biological_process	biological regulation|cellular process|regulation of biological process|response to stimulus|signaling	1	371	5	6672	0.248846	0.807299	3.59677	circRNA_3514|Chr2:113744312_113745181_+
GO:0048025	negative regulation of mRNA splicing, via spliceosome	biological_process	biological regulation|cellular process|metabolic process|negative regulation of biological process|regulation of biological process	2	371	15	6672	0.201552	0.807299	2.39784	circRNA_1346|Chr11:34865447_34879143_+;circRNA_1349|Chr11:34879058_34932316_+
GO:0048041	focal adhesion assembly	biological_process	biological adhesion|cellular component organization or biogenesis|cellular process	1	371	44	6672	0.919996	0.968144	0.408723	circRNA_0716|Chr1:259479327_259489683_-
GO:0048048	embryonic eye morphogenesis	biological_process	developmental process|multicellular organismal process	1	371	6	6672	0.290646	0.807299	2.9973	circRNA_4330|Chr3:117726599_117728604_-
GO:0048050	post-embryonic eye morphogenesis	biological_process	developmental process|multicellular organismal process	1	371	6	6672	0.290646	0.807299	2.9973	circRNA_4330|Chr3:117726599_117728604_-
GO:0048066	developmental pigmentation	biological_process	NA	1	371	10	6672	0.435893	0.807299	1.79838	circRNA_0591|Chr1:233578229_233581182_+
GO:0048146	positive regulation of fibroblast proliferation	biological_process	biological regulation|cellular process|positive regulation of biological process|regulation of biological process	3	371	39	6672	0.370198	0.807299	1.38337	circRNA_6937|Chr9:78945266_78947892_-;circRNA_3509|Chr2:113189774_113198013_-;circRNA_6935|Chr9:78911759_78911926_+
GO:0048148	behavioral response to cocaine	biological_process	multicellular organismal process|response to stimulus	1	371	12	6672	0.496977	0.810254	1.49865	circRNA_1557|Chr12:14654706_14703546_-
GO:0048156	tau protein binding	molecular_function	binding	2	371	8	6672	0.0691104	0.671779	4.49596	circRNA_1346|Chr11:34865447_34879143_+;circRNA_1349|Chr11:34879058_34932316_+
GO:0048167	regulation of synaptic plasticity	biological_process	biological regulation|cellular process|regulation of biological process|signaling	1	371	18	6672	0.643406	0.848633	0.999102	circRNA_6219|Chr7:130522030_130524289_+
GO:0048188	Set1C/COMPASS complex	cellular_component	cell|cell part|macromolecular complex|membrane-enclosed lumen|organelle|organelle part	1	371	8	6672	0.367413	0.807299	2.24798	circRNA_1231|Chr10:95327724_95328546_-
GO:0048193	Golgi vesicle transport	biological_process	establishment of localization|localization	1	371	13	6672	0.524998	0.816973	1.38337	circRNA_5962|Chr7:29284390_29288495_+
GO:0048261	negative regulation of receptor-mediated endocytosis	biological_process	biological regulation|cellular component organization or biogenesis|cellular process|establishment of localization|localization|negative regulation of biological process|regulation of biological process	1	371	11	6672	0.467307	0.807299	1.63489	circRNA_0290|Chr1:154405931_154425509_+
GO:0048268	clathrin coat assembly	biological_process	cellular component organization or biogenesis|cellular process	1	371	33	6672	0.849328	0.925104	0.544964	circRNA_0290|Chr1:154405931_154425509_+
GO:0048280	vesicle fusion with Golgi apparatus	biological_process	cellular component organization or biogenesis|cellular process|establishment of localization|localization	1	371	7	6672	0.330125	0.807299	2.56912	circRNA_1983|Chr14:17407714_17408515_-
GO:0048286	lung alveolus development	biological_process	developmental process|multicellular organismal process	3	371	36	6672	0.32371	0.807299	1.49865	circRNA_2146|Chr14:88724076_88725530_-;circRNA_0447|Chr1:200606971_200615170_-;circRNA_2151|Chr14:88786305_88792540_-
GO:0048298	positive regulation of isotype switching to IgA isotypes	biological_process	biological regulation|cellular process|developmental process|immune system process|metabolic process|multicellular organismal process|positive regulation of biological process|regulation of biological process|response to stimulus	1	371	9	6672	0.402631	0.807299	1.9982	circRNA_5526|Chr6:11219826_11221789_-
GO:0048304	positive regulation of isotype switching to IgG isotypes	biological_process	biological regulation|cellular process|developmental process|immune system process|metabolic process|multicellular organismal process|positive regulation of biological process|regulation of biological process|response to stimulus	2	371	7	6672	0.0537688	0.612665	5.13824	circRNA_4508|Chr4:3972586_3976284_+;circRNA_5526|Chr6:11219826_11221789_-
GO:0048333	mesodermal cell differentiation	biological_process	cellular process|developmental process|multicellular organismal process	3	371	15	6672	0.0471303	0.612459	3.59677	circRNA_3283|Chr19:61714402_61714542_+;circRNA_0447|Chr1:200606971_200615170_-;circRNA_7065|ChrX:4819220_4832241_-
GO:0048339	paraxial mesoderm development	biological_process	developmental process|multicellular organismal process	1	371	20	6672	0.682064	0.858756	0.899191	circRNA_0375|Chr1:177651557_177654228_+
GO:0048340	paraxial mesoderm morphogenesis	biological_process	developmental process|multicellular organismal process	1	371	13	6672	0.524998	0.816973	1.38337	circRNA_3057|Chr18:72593000_72595275_+
GO:0048365	Rac GTPase binding	molecular_function	binding	5	371	52	6672	0.160866	0.807299	1.72921	circRNA_6046|Chr7:64125692_64131186_-;circRNA_2411|Chr15:106417736_106434369_+;circRNA_6894|Chr9:67242046_67257543_+;circRNA_5662|Chr6:60609626_60618957_+;circRNA_5232|Chr5:117620103_117623151_-
GO:0048368	lateral mesoderm development	biological_process	developmental process|multicellular organismal process	1	371	8	6672	0.367413	0.807299	2.24798	circRNA_0375|Chr1:177651557_177654228_+
GO:0048384	retinoic acid receptor signaling pathway	biological_process	biological regulation|cellular process|regulation of biological process|response to stimulus|signaling	1	371	5	6672	0.248846	0.807299	3.59677	circRNA_1897|Chr13:106507146_106507561_+
GO:0048386	positive regulation of retinoic acid receptor signaling pathway	biological_process	biological regulation|cellular process|positive regulation of biological process|regulation of biological process|response to stimulus|signaling	2	371	7	6672	0.0537688	0.612665	5.13824	circRNA_4413|Chr3:148837814_148842440_+;circRNA_4416|Chr3:148837814_148862118_+
GO:0048407	platelet-derived growth factor binding	molecular_function	binding	7	371	34	6672	0.00226262	0.256981	3.70255	circRNA_6828|Chr9:52047552_52048745_+;circRNA_4051|Chr3:6464953_6472752_+;circRNA_3914|Chr20:12666784_12667523_+;circRNA_6830|Chr9:52048089_52048881_+;circRNA_1147|Chr10:82752455_82752793_+;circRNA_6827|Chr9:52047552_52047844_+;circRNA_6825|Chr9:52043678_52045132_+
GO:0048468	cell development	biological_process	cellular process|developmental process	1	371	12	6672	0.496977	0.810254	1.49865	circRNA_2849|Chr18:2445774_2446986_+
GO:0048469	cell maturation	biological_process	cellular process|developmental process	1	371	17	6672	0.622353	0.847573	1.05787	circRNA_6753|Chr9:18653895_18660843_+
GO:0048471	perinuclear region of cytoplasm	cellular_component	cell|cell part	24	371	437	6672	0.557786	0.831409	0.98767	circRNA_6107|Chr7:76837537_76845975_-;circRNA_6242|Chr7:140415833_140417547_-;circRNA_3621|Chr2:184309074_184309661_-;circRNA_1255|Chr10:106264856_106265494_+;circRNA_0544|Chr1:220039308_220042767_-;circRNA_6241|Chr7:140415223_140417547_-;circRNA_4139|Chr3:45365578_45372679_+;circRNA_0290|Chr1:154405931_154425509_+;circRNA_6772|Chr9:26636334_26669699_-;circRNA_3283|Chr19:61714402_61714542_+;circR…
GO:0048477	oogenesis	biological_process	cellular process|developmental process|multicellular organismal process|multi-organism process|reproduction|reproductive process	1	371	5	6672	0.248846	0.807299	3.59677	circRNA_6243|Chr7:140533891_140536242_-
GO:0048487	beta-tubulin binding	molecular_function	binding	2	371	26	6672	0.428449	0.807299	1.38337	circRNA_4837|Chr4:140870957_140872418_+;circRNA_5414|Chr5:157690578_157712883_+
GO:0048489	synaptic vesicle transport	biological_process	establishment of localization|localization	2	371	9	6672	0.0856728	0.732146	3.99641	circRNA_0447|Chr1:200606971_200615170_-;circRNA_2726|Chr17:54209230_54209739_+
GO:0048490	anterograde synaptic vesicle transport	biological_process	cellular process|establishment of localization|localization	1	371	18	6672	0.643406	0.848633	0.999102	circRNA_3332|Chr2:24067948_24083767_+
GO:0048513	animal organ development	biological_process	developmental process|multicellular organismal process	1	371	6	6672	0.290646	0.807299	2.9973	circRNA_2562|Chr16:63915078_63933482_+
GO:0048536	spleen development	biological_process	developmental process|immune system process|multicellular organismal process	1	371	16	6672	0.60006	0.842385	1.12399	circRNA_3815|Chr2:238742934_238746181_-
GO:0048538	thymus development	biological_process	developmental process|immune system process|multicellular organismal process	3	371	29	6672	0.216635	0.807299	1.8604	circRNA_3203|Chr19:38057557_38062193_+;circRNA_4413|Chr3:148837814_148842440_+;circRNA_4416|Chr3:148837814_148862118_+
GO:0048539	bone marrow development	biological_process	developmental process|immune system process|multicellular organismal process	2	371	6	6672	0.0398481	0.559784	5.99461	circRNA_4413|Chr3:148837814_148842440_+;circRNA_4416|Chr3:148837814_148862118_+
GO:0048545	response to steroid hormone	biological_process	response to stimulus	1	371	22	6672	0.716542	0.871665	0.817447	circRNA_1147|Chr10:82752455_82752793_+
GO:0048557	embryonic digestive tract morphogenesis	biological_process	developmental process|multicellular organismal process	2	371	8	6672	0.0691104	0.671779	4.49596	circRNA_0447|Chr1:200606971_200615170_-;circRNA_3458|Chr2:57539193_57544062_-
GO:0048562	embryonic organ morphogenesis	biological_process	developmental process|multicellular organismal process	1	371	5	6672	0.248846	0.807299	3.59677	circRNA_0447|Chr1:200606971_200615170_-
GO:0048565	digestive tract development	biological_process	developmental process|multicellular organismal process	7	371	40	6672	0.00588569	0.293409	3.14717	circRNA_6828|Chr9:52047552_52048745_+;circRNA_6830|Chr9:52048089_52048881_+;circRNA_6827|Chr9:52047552_52047844_+;circRNA_6825|Chr9:52043678_52045132_+;circRNA_0447|Chr1:200606971_200615170_-;circRNA_0857|Chr10:13944932_13945211_+;circRNA_2849|Chr18:2445774_2446986_+
GO:0048568	embryonic organ development	biological_process	developmental process|multicellular organismal process	4	371	52	6672	0.327556	0.807299	1.38337	circRNA_0447|Chr1:200606971_200615170_-;circRNA_6103|Chr7:76114791_76119201_+;circRNA_0375|Chr1:177651557_177654228_+;circRNA_7065|ChrX:4819220_4832241_-
GO:0048570	notochord morphogenesis	biological_process	developmental process|multicellular organismal process	1	371	12	6672	0.496977	0.810254	1.49865	circRNA_7065|ChrX:4819220_4832241_-
GO:0048589	developmental growth	biological_process	developmental process|growth	3	371	25	6672	0.159475	0.807299	2.15806	circRNA_3458|Chr2:57539193_57544062_-;circRNA_3670|Chr2:189226433_189230967_-;circRNA_3057|Chr18:72593000_72595275_+
GO:0048592	eye morphogenesis	biological_process	developmental process|multicellular organismal process	2	371	8	6672	0.0691104	0.671779	4.49596	circRNA_4051|Chr3:6464953_6472752_+;circRNA_3458|Chr2:57539193_57544062_-
GO:0048596	embryonic camera-type eye morphogenesis	biological_process	developmental process|multicellular organismal process	2	371	15	6672	0.201552	0.807299	2.39784	circRNA_4186|Chr3:59678949_59680308_-;circRNA_4697|Chr4:66567829_66568912_-
GO:0048608	reproductive structure development	biological_process	developmental process|multicellular organismal process|reproduction|reproductive process	1	371	13	6672	0.524998	0.816973	1.38337	circRNA_0447|Chr1:200606971_200615170_-
GO:0048617	embryonic foregut morphogenesis	biological_process	developmental process|multicellular organismal process	1	371	16	6672	0.60006	0.842385	1.12399	circRNA_3057|Chr18:72593000_72595275_+
GO:0048646	anatomical structure formation involved in morphogenesis	biological_process	developmental process	1	371	5	6672	0.248846	0.807299	3.59677	circRNA_2849|Chr18:2445774_2446986_+
GO:0048661	positive regulation of smooth muscle cell proliferation	biological_process	biological regulation|cellular process|positive regulation of biological process|regulation of biological process	4	371	51	6672	0.314734	0.807299	1.4105	circRNA_0591|Chr1:233578229_233581182_+;circRNA_0447|Chr1:200606971_200615170_-;circRNA_4829|Chr4:131439626_131453028_-;circRNA_3670|Chr2:189226433_189230967_-
GO:0048663	neuron fate commitment	biological_process	cellular process|developmental process|multicellular organismal process	1	371	18	6672	0.643406	0.848633	0.999102	circRNA_2562|Chr16:63915078_63933482_+
GO:0048675	axon extension	biological_process	cellular component organization or biogenesis|cellular process|developmental process|growth|multicellular organismal process	2	371	20	6672	0.306534	0.807299	1.79838	circRNA_3572|Chr2:144876416_144917472_+;circRNA_3283|Chr19:61714402_61714542_+
GO:0048678	response to axon injury	biological_process	response to stimulus	5	371	23	6672	0.00757872	0.293409	3.90953	circRNA_3745|Chr2:210808354_210822401_-;circRNA_3744|Chr2:210806416_210806638_+;circRNA_2439|Chr16:2354385_2354582_-;circRNA_1840|Chr13:85397122_85399509_-;circRNA_3367|Chr2:30384653_30433774_-
GO:0048679	regulation of axon regeneration	biological_process	biological regulation|cellular component organization or biogenesis|cellular process|developmental process|multicellular organismal process|regulation of biological process|response to stimulus	2	371	22	6672	0.348137	0.807299	1.63489	circRNA_0647|Chr1:251455609_251485480_+;circRNA_3727|Chr2:206964921_206976810_-
GO:0048680	positive regulation of axon regeneration	biological_process	biological regulation|cellular component organization or biogenesis|cellular process|developmental process|multicellular organismal process|positive regulation of biological process|regulation of biological process|response to stimulus	1	371	11	6672	0.467307	0.807299	1.63489	circRNA_2562|Chr16:63915078_63933482_+
GO:0048681	negative regulation of axon regeneration	biological_process	biological regulation|cellular component organization or biogenesis|cellular process|developmental process|multicellular organismal process|negative regulation of biological process|regulation of biological process|response to stimulus	2	371	14	6672	0.180962	0.807299	2.56912	circRNA_0647|Chr1:251455609_251485480_+;circRNA_3727|Chr2:206964921_206976810_-
GO:0048701	embryonic cranial skeleton morphogenesis	biological_process	developmental process|multicellular organismal process	5	371	24	6672	0.00914593	0.329093	3.74663	circRNA_0447|Chr1:200606971_200615170_-;circRNA_3458|Chr2:57539193_57544062_-;circRNA_6103|Chr7:76114791_76119201_+;circRNA_6753|Chr9:18653895_18660843_+;circRNA_3057|Chr18:72593000_72595275_+
GO:0048705	skeletal system morphogenesis	biological_process	developmental process|multicellular organismal process	3	371	38	6672	0.35474	0.807299	1.41978	circRNA_1147|Chr10:82752455_82752793_+;circRNA_4285|Chr3:104816866_104818862_+;circRNA_6753|Chr9:18653895_18660843_+
GO:0048706	embryonic skeletal system development	biological_process	developmental process|multicellular organismal process	2	371	32	6672	0.538235	0.825583	1.12399	circRNA_4186|Chr3:59678949_59680308_-;circRNA_1147|Chr10:82752455_82752793_+
GO:0048709	oligodendrocyte differentiation	biological_process	cellular process|developmental process|multicellular organismal process	1	371	12	6672	0.496977	0.810254	1.49865	circRNA_2562|Chr16:63915078_63933482_+
GO:0048730	epidermis morphogenesis	biological_process	developmental process	1	371	10	6672	0.435893	0.807299	1.79838	circRNA_0447|Chr1:200606971_200615170_-
GO:0048733	sebaceous gland development	biological_process	developmental process|multicellular organismal process	1	371	34	6672	0.857748	0.931308	0.528936	circRNA_3663|Chr2:188308301_188309036_+
GO:0048738	cardiac muscle tissue development	biological_process	developmental process|multicellular organismal process	4	371	18	6672	0.0154584	0.42121	3.99641	circRNA_3283|Chr19:61714402_61714542_+;circRNA_2562|Chr16:63915078_63933482_+;circRNA_2849|Chr18:2445774_2446986_+;circRNA_0647|Chr1:251455609_251485480_+
[truncated: 534 more rows]

## Sheet: up-regulated (SSCI–2 vs. sham)
id	Term	Category	GO_classify2	ListHits	ListTotal	PopHits	PopTotal	p-value	q-value	Enrichment_score	Gene
[truncated: 1,902 more rows]

## Sheet: up-regulated (SSCI–3 vs. sham)
id	Term	Category	GO_classify2	ListHits	ListTotal	PopHits	PopTotal	p-value	q-value	Enrichment_score	Gene
[truncated: 2,382 more rows]

[truncated: 3 more sheets: down-regulated(SSCI–1 vs. sham), down-regulated(SSCI–2 vs. sham), down-regulated(SSCI–3 vs. sham)]
