# Supplementary material for: Expression profiles of circular RNAs and interaction networks of competing endogenous RNAs in neurogenic bladder of rats following suprasacral spinal cord injury
Source: PeerJ. 2023 Sep 18;11:e16042. doi: 10.7717/peerj.16042 (PMC10512963; doi:10.7717/peerj.16042)
Supplement: Supplemental Information 17 [file peerj-11-16042-s017.xlsx]

## Sheet: up-regulated (SSCI–1 vs. sham)
id	Term	Classification_level1	Classification_level2	ListHits	ListTotal	PopHits	PopTotal	p-value	q-value	Enrichment_score	Gene	hyperlink_only_excel
rno00010	Glycolysis / Gluconeogenesis	Metabolism	Carbohydrate metabolism	1	151	5	2681	0.251793	0.997288	3.55099	circRNA_0722|Chr1:261165387_261165588_-(Pgam1);	rno00010
rno00040	Pentose and glucuronate interconversions	Metabolism	Carbohydrate metabolism	2	151	8	2681	0.0705492	0.808921	4.43874	circRNA_1993|Chr14:22619364_22655924_+(Ugt2b7);circRNA_2054|Chr14:44496991_44498906_+(Ugdh);	rno00040
rno00053	Ascorbate and aldarate metabolism	Metabolism	Carbohydrate metabolism	2	151	6	2681	0.0406958	0.673796	5.91832	circRNA_1993|Chr14:22619364_22655924_+(Ugt2b7);circRNA_2054|Chr14:44496991_44498906_+(Ugdh);	rno00053
rno00140	Steroid hormone biosynthesis	Metabolism	Lipid metabolism	2	151	6	2681	0.0406958	0.673796	5.91832	circRNA_1993|Chr14:22619364_22655924_+(Ugt2b7);circRNA_6157|Chr7:116072198_116158807_-(Cyp11b3);	rno00140
rno00220	Arginine biosynthesis	Metabolism	Amino acid metabolism	1	151	5	2681	0.251793	0.997288	3.55099	circRNA_0728|Chr1:263249208_263253633_-(Got1);	rno00220
rno00230	Purine metabolism	Metabolism	Nucleotide metabolism	1	151	57	2681	0.964576	0.997288	0.311491	circRNA_2222|Chr15:3233141_3293913_-(Adk);	rno00230
rno00240	Pyrimidine metabolism	Metabolism	Nucleotide metabolism	1	151	19	2681	0.668877	0.997288	0.934472	circRNA_1840|Chr13:85397122_85399509_-(Uck2);	rno00240
rno00250	Alanine, aspartate and glutamate metabolism	Metabolism	Amino acid metabolism	1	151	13	2681	0.530158	0.997288	1.36577	circRNA_0728|Chr1:263249208_263253633_-(Got1);	rno00250
rno00270	Cysteine and methionine metabolism	Metabolism	Amino acid metabolism	1	151	8	2681	0.371481	0.997288	2.21937	circRNA_0728|Chr1:263249208_263253633_-(Got1);	rno00270
rno00310	Lysine degradation	Metabolism	Amino acid metabolism	2	151	83	2681	0.953923	0.997288	0.427831	circRNA_3663|Chr2:188308301_188309036_+(Ash1l);circRNA_6243|Chr7:140533891_140536242_-(Kmt2d);	rno00310
rno00480	Glutathione metabolism	Metabolism	Metabolism of other amino acids	3	151	15	2681	0.0483705	0.717137	3.55099	circRNA_3738|Chr2:210723584_210806489_-(Gstm7);circRNA_3744|Chr2:210806416_210806638_+(Gstm1);circRNA_3745|Chr2:210808354_210822401_-(Gstm1);	rno00480
rno00514	Other types of O-glycan biosynthesis	Metabolism	Glycan biosynthesis and metabolism	1	151	9	2681	0.406987	0.997288	1.97277	circRNA_6169|Chr7:119987740_119990307_-(Mfng);	rno00514
rno00520	Amino sugar and nucleotide sugar metabolism	Metabolism	Carbohydrate metabolism	1	151	22	2681	0.722108	0.997288	0.807044	circRNA_2054|Chr14:44496991_44498906_+(Ugdh);	rno00520
rno00532	Glycosaminoglycan biosynthesis - chondroitin sulfate / dermatan sulfate	Metabolism	Glycan biosynthesis and metabolism	2	151	7	2681	0.0549005	0.717137	5.07285	circRNA_0225|Chr1:127025462_127025957_+(Chsy1);circRNA_3966|Chr20:27756685_27757153_-(Dse);	rno00532
rno00561	Glycerolipid metabolism	Metabolism	Lipid metabolism	1	151	24	2681	0.75278	0.997288	0.73979	circRNA_5617|Chr6:41822551_41830656_-(Lpin1);	rno00561
rno00562	Inositol phosphate metabolism	Metabolism	Carbohydrate metabolism	5	151	77	2681	0.439333	0.997288	1.15292	circRNA_0647|Chr1:251455609_251485480_+(Pten);circRNA_2831|Chr18:301858_306376_-(Mtmr1);circRNA_3930|Chr20:18467660_18474832_-(Ipmk);circRNA_6917|Chr9:71915420_71927987_+(Pikfyve);circRNA_6919|Chr9:71920586_71955010_+(Pikfyve);	rno00562
rno00563	Glycosylphosphatidylinositol(GPI)-anchor biosynthesis	Metabolism	Glycan biosynthesis and metabolism	1	151	7	2681	0.333864	0.997288	2.53642	circRNA_3850|Chr2:257937494_257945564_+(Pigk);	rno00563
rno00564	Glycerophospholipid metabolism	Metabolism	Lipid metabolism	4	151	42	2681	0.209014	0.997288	1.69095	circRNA_1955|Chr14:9421418_9440942_-(Cds1);circRNA_3514|Chr2:113744312_113745181_+(Pld1);circRNA_5564|Chr6:25409775_25417047_-(Plb1);circRNA_5617|Chr6:41822551_41830656_-(Lpin1);	rno00564
rno00565	Ether lipid metabolism	Metabolism	Lipid metabolism	2	151	28	2681	0.47398	0.997288	1.26821	circRNA_3514|Chr2:113744312_113745181_+(Pld1);circRNA_5564|Chr6:25409775_25417047_-(Plb1);	rno00565
rno00590	Arachidonic acid metabolism	Metabolism	Lipid metabolism	2	151	10	2681	0.105375	0.990538	3.55099	circRNA_5223|Chr5:115146569_115199307_-(Cyp2j3);circRNA_5564|Chr6:25409775_25417047_-(Plb1);	rno00590
rno00591	Linoleic acid metabolism	Metabolism	Lipid metabolism	2	151	6	2681	0.0406958	0.673796	5.91832	circRNA_5223|Chr5:115146569_115199307_-(Cyp2j3);circRNA_5564|Chr6:25409775_25417047_-(Plb1);	rno00591
rno00592	alpha-Linolenic acid metabolism	Metabolism	Lipid metabolism	2	151	10	2681	0.105375	0.990538	3.55099	circRNA_0576|Chr1:226119298_226139368_-(Fads2);circRNA_5564|Chr6:25409775_25417047_-(Plb1);	rno00592
rno00600	Sphingolipid metabolism	Metabolism	Lipid metabolism	1	151	26	2681	0.780086	0.997288	0.682883	circRNA_2887|Chr18:15480332_15494701_+(B4galt6);	rno00600
rno00601	Glycosphingolipid biosynthesis - lacto and neolacto series	Metabolism	Glycan biosynthesis and metabolism	1	151	5	2681	0.251793	0.997288	3.55099	circRNA_2177|Chr14:107594175_107594869_-(B3gnt2);	rno00601
rno00604	Glycosphingolipid biosynthesis - ganglio series	Metabolism	Glycan biosynthesis and metabolism	1	151	9	2681	0.406987	0.997288	1.97277	circRNA_3585|Chr2:154520979_154532393_-(Slc33a1);	rno00604
rno00620	Pyruvate metabolism	Metabolism	Carbohydrate metabolism	1	151	12	2681	0.501983	0.997288	1.47958	circRNA_6574|Chr8:94283953_94292111_-(Me1);	rno00620
rno00830	Retinol metabolism	Metabolism	Metabolism of cofactors and vitamins	2	151	7	2681	0.0549005	0.717137	5.07285	circRNA_1993|Chr14:22619364_22655924_+(Ugt2b7);circRNA_6066|Chr7:71069214_71077102_+(Rdh16);	rno00830
rno00860	Porphyrin and chlorophyll metabolism	Metabolism	Metabolism of cofactors and vitamins	1	151	6	2681	0.294012	0.997288	2.95916	circRNA_1993|Chr14:22619364_22655924_+(Ugt2b7);	rno00860
rno00980	Metabolism of xenobiotics by cytochrome P450	Metabolism	Xenobiotics biodegradation and metabolism	4	151	14	2681	0.00621052	0.338714	5.07285	circRNA_1993|Chr14:22619364_22655924_+(Ugt2b7);circRNA_3738|Chr2:210723584_210806489_-(Gstm7);circRNA_3744|Chr2:210806416_210806638_+(Gstm1);circRNA_3745|Chr2:210808354_210822401_-(Gstm1);	rno00980
rno00982	Drug metabolism - cytochrome P450	Metabolism	Xenobiotics biodegradation and metabolism	4	151	15	2681	0.00810319	0.338714	4.73466	circRNA_1993|Chr14:22619364_22655924_+(Ugt2b7);circRNA_3738|Chr2:210723584_210806489_-(Gstm7);circRNA_3744|Chr2:210806416_210806638_+(Gstm1);circRNA_3745|Chr2:210808354_210822401_-(Gstm1);	rno00982
rno00983	Drug metabolism - other enzymes	Metabolism	Xenobiotics biodegradation and metabolism	5	151	21	2681	0.00517541	0.338714	4.22737	circRNA_1840|Chr13:85397122_85399509_-(Uck2);circRNA_1993|Chr14:22619364_22655924_+(Ugt2b7);circRNA_3738|Chr2:210723584_210806489_-(Gstm7);circRNA_3744|Chr2:210806416_210806638_+(Gstm1);circRNA_3745|Chr2:210808354_210822401_-(Gstm1);	rno00983
rno01040	Biosynthesis of unsaturated fatty acids	Metabolism	Lipid metabolism	2	151	14	2681	0.184469	0.997288	2.53642	circRNA_0576|Chr1:226119298_226139368_-(Fads2);circRNA_0734|Chr1:264001511_264066989_+(Scd2);	rno01040
rno01521	EGFR tyrosine kinase inhibitor resistance	Human Diseases	Drug resistance: antineoplastic	4	151	65	2681	0.503303	0.997288	1.09261	circRNA_0447|Chr1:200606971_200615170_-(Fgfr2);circRNA_0647|Chr1:251455609_251485480_+(Pten);circRNA_2562|Chr16:63915078_63933482_+(Nrg1);circRNA_3670|Chr2:189226433_189230967_-(Il6r);	rno01521
rno01524	Platinum drug resistance	Human Diseases	Drug resistance: antineoplastic	5	151	45	2681	0.105863	0.990538	1.97277	circRNA_0038|Chr1:15545013_15551204_+(Map3k5);circRNA_3738|Chr2:210723584_210806489_-(Gstm7);circRNA_3744|Chr2:210806416_210806638_+(Gstm1);circRNA_3745|Chr2:210808354_210822401_-(Gstm1);circRNA_5526|Chr6:11219826_11221789_-(Msh2);	rno01524
rno02010	ABC transporters	Environmental Information Processing	Membrane transport	1	151	25	2681	0.766829	0.997288	0.710199	circRNA_3773|Chr2:225348168_225352508_-(Abcd3);	rno02010
rno03008	Ribosome biogenesis in eukaryotes	Genetic Information Processing	Translation	1	151	26	2681	0.780086	0.997288	0.682883	circRNA_5775|Chr6:108797786_108802113_+(Fcf1);	rno03008
rno03013	RNA transport	Genetic Information Processing	Translation	7	151	58	2681	0.0419107	0.673796	2.14284	circRNA_0432|Chr1:197981834_197983786_-(Eif3c);circRNA_0433|Chr1:197981834_197983858_-(Eif3c);circRNA_1447|Chr11:81375744_81376852_-(Eif4a2);circRNA_2766|Chr17:76245627_76265943_-(Upf2);circRNA_2768|Chr17:76260636_76265943_-(Upf2);circRNA_4062|Chr3:8887351_8892631_+(Nup188);circRNA_5413|Chr5:156506448_156517254_+(Eif4g3);	rno03013
rno03015	mRNA surveillance pathway	Genetic Information Processing	Translation	5	151	47	2681	0.121743	0.990538	1.88883	circRNA_2766|Chr17:76245627_76265943_-(Upf2);circRNA_2768|Chr17:76260636_76265943_-(Upf2);circRNA_5059|Chr5:48695038_48698976_+(Rngtt);circRNA_5840|Chr6:129621583_129636485_+(Papola);circRNA_5844|Chr6:129641475_129660096_+(Papola);	rno03015
rno03018	RNA degradation	Genetic Information Processing	Folding, sorting and degradation	1	151	53	2681	0.95511	0.997288	0.334999	circRNA_4735|Chr4:87017858_87018778_-(Lsm5);	rno03018
rno03040	Spliceosome	Genetic Information Processing	Transcription	3	151	30	2681	0.236999	0.997288	1.7755	circRNA_3885|Chr20:4896892_4921063_-(Hspa1l);circRNA_4009|Chr20:48555348_48561987_+(Cdc40);circRNA_4735|Chr4:87017858_87018778_-(Lsm5);	rno03040
rno03060	Protein export	Genetic Information Processing	Folding, sorting and degradation	1	151	7	2681	0.333864	0.997288	2.53642	circRNA_5687|Chr6:76020953_76031336_+(Srp54a);	rno03060
rno03320	PPAR signaling pathway	Organismal Systems	Endocrine system	4	151	54	2681	0.362212	0.997288	1.31518	circRNA_0576|Chr1:226119298_226139368_-(Fads2);circRNA_0716|Chr1:259479327_259489683_-(Sorbs1);circRNA_0734|Chr1:264001511_264066989_+(Scd2);circRNA_6574|Chr8:94283953_94292111_-(Me1);	rno03320
rno03430	Mismatch repair	Genetic Information Processing	Replication and repair	1	151	6	2681	0.294012	0.997288	2.95916	circRNA_5526|Chr6:11219826_11221789_-(Msh2);	rno03430
rno03440	Homologous recombination	Genetic Information Processing	Replication and repair	2	151	21	2681	0.333181	0.997288	1.69095	circRNA_5752|Chr6:102510293_102512499_+(Rad51b);circRNA_6934|Chr9:78341845_78350281_-(Bard1);	rno03440
rno04010	MAPK signaling pathway	Environmental Information Processing	Signal transduction	7	151	213	2681	0.964099	0.997288	0.583497	circRNA_0038|Chr1:15545013_15551204_+(Map3k5);circRNA_0447|Chr1:200606971_200615170_-(Fgfr2);circRNA_3203|Chr19:38057557_38062193_+(Nfatc3);circRNA_3733|Chr2:208198684_208203924_-(Rap1a);circRNA_3885|Chr20:4896892_4921063_-(Hspa1l);circRNA_4863|Chr4:151118221_151123637_-(Cacna1c);circRNA_5806|Chr6:124625936_124680274_-(Rps6ka5);	rno04010
rno04012	ErbB signaling pathway	Environmental Information Processing	Signal transduction	1	151	71	2681	0.984582	0.997288	0.25007	circRNA_2562|Chr16:63915078_63933482_+(Nrg1);	rno04012
rno04014	Ras signaling pathway	Environmental Information Processing	Signal transduction	5	151	131	2681	0.872596	0.997288	0.67767	circRNA_0447|Chr1:200606971_200615170_-(Fgfr2);circRNA_0761|Chr1:274688579_274718538_+(Shoc2);circRNA_0763|Chr1:274700623_274701534_+(Shoc2);circRNA_3514|Chr2:113744312_113745181_+(Pld1);circRNA_3733|Chr2:208198684_208203924_-(Rap1a);	rno04014
rno04015	Rap1 signaling pathway	Environmental Information Processing	Signal transduction	6	151	139	2681	0.807775	0.997288	0.766401	circRNA_0447|Chr1:200606971_200615170_-(Fgfr2);circRNA_0591|Chr1:233578229_233581182_+(Gnaq);circRNA_1547|Chr12:13717791_13718009_-(Actb);circRNA_3283|Chr19:61714402_61714542_+(Itgb1);circRNA_3733|Chr2:208198684_208203924_-(Rap1a);circRNA_5662|Chr6:60609626_60618957_+(Dock4);	rno04015
rno04020	Calcium signaling pathway	Environmental Information Processing	Signal transduction	5	151	116	2681	0.794207	0.997288	0.7653	circRNA_0591|Chr1:233578229_233581182_+(Gnaq);circRNA_4863|Chr4:151118221_151123637_-(Cacna1c);circRNA_4948|Chr4:180711145_180722357_-(Itpr2);circRNA_5986|Chr7:41167312_41167751_+(Atp2b1);circRNA_5987|Chr7:41167312_41178782_+(Atp2b1);	rno04020
rno04022	cGMP - PKG signaling pathway	Environmental Information Processing	Signal transduction	9	151	156	2681	0.521988	0.997288	1.02433	circRNA_0233|Chr1:128239552_128243030_-(Mef2a);circRNA_0591|Chr1:233578229_233581182_+(Gnaq);circRNA_3203|Chr19:38057557_38062193_+(Nfatc3);circRNA_4669|Chr4:64894605_64899587_-(Creb3l2);circRNA_4863|Chr4:151118221_151123637_-(Cacna1c);circRNA_4948|Chr4:180711145_180722357_-(Itpr2);circRNA_5986|Chr7:41167312_41167751_+(Atp2b1);circRNA_5987|Chr7:41167312_41178782_+(Atp2b1);circRNA_6001|Chr7:514253…	rno04022
rno04024	cAMP signaling pathway	Environmental Information Processing	Signal transduction	7	151	130	2681	0.607102	0.997288	0.956037	circRNA_3514|Chr2:113744312_113745181_+(Pld1);circRNA_3733|Chr2:208198684_208203924_-(Rap1a);circRNA_4669|Chr4:64894605_64899587_-(Creb3l2);circRNA_4863|Chr4:151118221_151123637_-(Cacna1c);circRNA_5986|Chr7:41167312_41167751_+(Atp2b1);circRNA_5987|Chr7:41167312_41178782_+(Atp2b1);circRNA_6001|Chr7:51425330_51432888_-(Ppp1r12a);	rno04024
rno04060	Cytokine-cytokine receptor interaction	Environmental Information Processing	Signaling molecules and interaction	1	151	32	2681	0.845288	0.997288	0.554843	circRNA_3670|Chr2:189226433_189230967_-(Il6r);	rno04060
rno04062	Chemokine signaling pathway	Organismal Systems	Immune system	1	151	98	2681	0.996941	0.997288	0.181173	circRNA_3733|Chr2:208198684_208203924_-(Rap1a);	rno04062
rno04066	HIF-1 signaling pathway	Environmental Information Processing	Signal transduction	1	151	51	2681	0.949473	0.997288	0.348137	circRNA_3670|Chr2:189226433_189230967_-(Il6r);	rno04066
rno04068	FoxO signaling pathway	Environmental Information Processing	Signal transduction	2	151	87	2681	0.962228	0.997288	0.40816	circRNA_0647|Chr1:251455609_251485480_+(Pten);circRNA_3057|Chr18:72593000_72595275_+(Smad2);	rno04068
rno04070	Phosphatidylinositol signaling system	Environmental Information Processing	Signal transduction	7	151	102	2681	0.350528	0.997288	1.21848	circRNA_0647|Chr1:251455609_251485480_+(Pten);circRNA_1955|Chr14:9421418_9440942_-(Cds1);circRNA_2831|Chr18:301858_306376_-(Mtmr1);circRNA_3930|Chr20:18467660_18474832_-(Ipmk);circRNA_4948|Chr4:180711145_180722357_-(Itpr2);circRNA_6917|Chr9:71915420_71927987_+(Pikfyve);circRNA_6919|Chr9:71920586_71955010_+(Pikfyve);	rno04070
rno04071	Sphingolipid signaling pathway	Environmental Information Processing	Signal transduction	4	151	88	2681	0.741486	0.997288	0.807044	circRNA_0038|Chr1:15545013_15551204_+(Map3k5);circRNA_0591|Chr1:233578229_233581182_+(Gnaq);circRNA_0647|Chr1:251455609_251485480_+(Pten);circRNA_3514|Chr2:113744312_113745181_+(Pld1);	rno04071
rno04072	Phospholipase D signaling pathway	Environmental Information Processing	Signal transduction	1	151	89	2681	0.994745	0.997288	0.199494	circRNA_3514|Chr2:113744312_113745181_+(Pld1);	rno04072
rno04110	Cell cycle	Cellular Processes	Cell growth and death	1	151	72	2681	0.985474	0.997288	0.246597	circRNA_3057|Chr18:72593000_72595275_+(Smad2);	rno04110
rno04114	Oocyte meiosis	Cellular Processes	Cell growth and death	1	151	70	2681	0.983636	0.997288	0.253642	circRNA_4948|Chr4:180711145_180722357_-(Itpr2);	rno04114
rno04115	p53 signaling pathway	Cellular Processes	Cell growth and death	1	151	19	2681	0.668877	0.997288	0.934472	circRNA_0647|Chr1:251455609_251485480_+(Pten);	rno04115
rno04120	Ubiquitin mediated proteolysis	Genetic Information Processing	Folding, sorting and degradation	3	151	120	2681	0.970635	0.997288	0.443874	circRNA_3216|Chr19:39543248_39545672_+(Wwp2);circRNA_3621|Chr2:184309074_184309661_-(Fbxw7);circRNA_6107|Chr7:76837537_76845975_-(Ubr5);	rno04120
rno04140	Autophagy - animal	Cellular Processes	Transport and catabolism	1	151	77	2681	0.989221	0.997288	0.230584	circRNA_0647|Chr1:251455609_251485480_+(Pten);	rno04140
rno04141	Protein processing in endoplasmic reticulum	Genetic Information Processing	Folding, sorting and degradation	3	151	86	2681	0.873215	0.997288	0.619359	circRNA_0038|Chr1:15545013_15551204_+(Map3k5);circRNA_3792|Chr2:230311167_230317038_-(Sec24b);circRNA_3885|Chr20:4896892_4921063_-(Hspa1l);	rno04141
rno04142	Lysosome	Cellular Processes	Transport and catabolism	2	151	50	2681	0.783276	0.997288	0.710199	circRNA_3332|Chr2:24067948_24083767_+(Ap3b1);circRNA_5380|Chr5:149062724_149065190_+(Laptm5);	rno04142
rno04144	Endocytosis	Cellular Processes	Transport and catabolism	10	151	193	2681	0.659047	0.997288	0.919946	circRNA_0447|Chr1:200606971_200615170_-(Fgfr2);circRNA_2726|Chr17:54209230_54209739_+(Kif5b);circRNA_3057|Chr18:72593000_72595275_+(Smad2);circRNA_3514|Chr2:113744312_113745181_+(Pld1);circRNA_3885|Chr20:4896892_4921063_-(Hspa1l);circRNA_5414|Chr5:157690578_157712883_+(Capzb);circRNA_6241|Chr7:140415223_140417547_-(Arf3);circRNA_6242|Chr7:140415833_140417547_-(Arf3);circRNA_6781|Chr9:30155195_301…	rno04144
rno04145	Phagosome	Cellular Processes	Transport and catabolism	5	151	61	2681	0.257923	0.997288	1.45533	circRNA_1547|Chr12:13717791_13718009_-(Actb);circRNA_3283|Chr19:61714402_61714542_+(Itgb1);circRNA_3876|Chr20:4095939_4118506_+(RT1-Db1);circRNA_6917|Chr9:71915420_71927987_+(Pikfyve);circRNA_6919|Chr9:71920586_71955010_+(Pikfyve);	rno04145
rno04146	Peroxisome	Cellular Processes	Transport and catabolism	2	151	22	2681	0.35417	0.997288	1.61409	circRNA_3773|Chr2:225348168_225352508_-(Abcd3);circRNA_4561|Chr4:22084945_22091386_+(Crot);	rno04146
rno04150	mTOR signaling pathway	Environmental Information Processing	Signal transduction	2	151	89	2681	0.965826	0.997288	0.398988	circRNA_0647|Chr1:251455609_251485480_+(Pten);circRNA_5617|Chr6:41822551_41830656_-(Lpin1);	rno04150
rno04151	PI3K-Akt signaling pathway	Environmental Information Processing	Signal transduction	10	151	161	2681	0.421773	0.997288	1.10279	circRNA_0447|Chr1:200606971_200615170_-(Fgfr2);circRNA_0647|Chr1:251455609_251485480_+(Pten);circRNA_1147|Chr10:82752455_82752793_+(Col1a1);circRNA_1818|Chr13:77863217_77865781_-(Tnn);circRNA_3283|Chr19:61714402_61714542_+(Itgb1);circRNA_3670|Chr2:189226433_189230967_-(Il6r);circRNA_3914|Chr20:12666784_12667523_+(Col6a1);circRNA_4669|Chr4:64894605_64899587_-(Creb3l2);circRNA_6935|Chr9:78911759_78…	rno04151
rno04152	AMPK signaling pathway	Environmental Information Processing	Signal transduction	2	151	63	2681	0.879538	0.997288	0.56365	circRNA_0734|Chr1:264001511_264066989_+(Scd2);circRNA_4669|Chr4:64894605_64899587_-(Creb3l2);	rno04152
rno04210	Apoptosis	Cellular Processes	Cell growth and death	5	151	62	2681	0.268875	0.997288	1.43185	circRNA_0038|Chr1:15545013_15551204_+(Map3k5);circRNA_1547|Chr12:13717791_13718009_-(Actb);circRNA_2275|Chr15:36823412_36828644_+(Parp4);circRNA_2985|Chr18:51805551_51807909_+(Lmnb1);circRNA_4948|Chr4:180711145_180722357_-(Itpr2);	rno04210
rno04211	Longevity regulating pathway - mammal	Organismal Systems	Aging	1	151	64	2681	0.976617	0.997288	0.277421	circRNA_4669|Chr4:64894605_64899587_-(Creb3l2);	rno04211
rno04213	Longevity regulating pathway - multiple species	Organismal Systems	Aging	1	151	31	2681	0.83594	0.997288	0.572741	circRNA_3885|Chr20:4896892_4921063_-(Hspa1l);	rno04213
rno04217	Necroptosis	Cellular Processes	Cell growth and death	1	151	44	2681	0.923618	0.997288	0.403522	circRNA_2275|Chr15:36823412_36828644_+(Parp4);	rno04217
rno04218	Cellular senescence	Cellular Processes	Cell growth and death	7	151	111	2681	0.435874	0.997288	1.11968	circRNA_0647|Chr1:251455609_251485480_+(Pten);circRNA_1957|Chr14:10786399_10787114_+(Lin54);circRNA_1959|Chr14:10786399_10794860_+(Lin54);circRNA_3057|Chr18:72593000_72595275_+(Smad2);circRNA_3203|Chr19:38057557_38062193_+(Nfatc3);circRNA_4697|Chr4:66567829_66568912_-(Hipk2);circRNA_4948|Chr4:180711145_180722357_-(Itpr2);	rno04218
rno04260	Cardiac muscle contraction	Organismal Systems	Circulatory system	2	151	39	2681	0.655145	0.997288	0.910511	circRNA_1738|Chr13:52667988_52673721_+(Tnnt2);circRNA_4863|Chr4:151118221_151123637_-(Cacna1c);	rno04260
rno04261	Adrenergic signaling in cardiomyocytes	Organismal Systems	Circulatory system	7	151	102	2681	0.350528	0.997288	1.21848	circRNA_0591|Chr1:233578229_233581182_+(Gnaq);circRNA_1738|Chr13:52667988_52673721_+(Tnnt2);circRNA_4669|Chr4:64894605_64899587_-(Creb3l2);circRNA_4863|Chr4:151118221_151123637_-(Cacna1c);circRNA_5806|Chr6:124625936_124680274_-(Rps6ka5);circRNA_5986|Chr7:41167312_41167751_+(Atp2b1);circRNA_5987|Chr7:41167312_41178782_+(Atp2b1);	rno04261
rno04270	Vascular smooth muscle contraction	Organismal Systems	Circulatory system	8	151	132	2681	0.46903	0.997288	1.07606	circRNA_0591|Chr1:233578229_233581182_+(Gnaq);circRNA_0649|Chr1:252537818_252539458_-(Acta2);circRNA_0650|Chr1:252537894_252539495_+(Acta2);circRNA_4658|Chr4:62270233_62272586_+(Cald1);circRNA_4776|Chr4:115221467_115224878_-(Actg2);circRNA_4863|Chr4:151118221_151123637_-(Cacna1c);circRNA_4948|Chr4:180711145_180722357_-(Itpr2);circRNA_6001|Chr7:51425330_51432888_-(Ppp1r12a);	rno04270
rno04310	Wnt signaling pathway	Environmental Information Processing	Signal transduction	1	151	88	2681	0.99442	0.997288	0.201761	circRNA_3203|Chr19:38057557_38062193_+(Nfatc3);	rno04310
rno04330	Notch signaling pathway	Environmental Information Processing	Signal transduction	2	151	19	2681	0.290696	0.997288	1.86894	circRNA_6169|Chr7:119987740_119990307_-(Mfng);circRNA_6275|Chr8:12160079_12161683_+(Maml2);	rno04330
rno04340	Hedgehog signaling pathway	Environmental Information Processing	Signal transduction	1	151	25	2681	0.766829	0.997288	0.710199	circRNA_1270|Chr10:110157631_110164041_-(Csnk1d);	rno04340
rno04350	TGF-beta signaling pathway	Environmental Information Processing	Signal transduction	2	151	62	2681	0.873819	0.997288	0.572741	circRNA_3057|Chr18:72593000_72595275_+(Smad2);circRNA_3152|Chr19:32214551_32215127_+(Smad1);	rno04350
rno04360	Axon guidance	Organismal Systems	Development and regeneration	6	151	115	2681	0.638577	0.997288	0.926346	circRNA_1029|Chr10:62751173_62767418_-(Ssh2);circRNA_1288|Chr11:10020678_10022991_+(Robo1);circRNA_1878|Chr13:100347405_100353039_-(Enah);circRNA_3203|Chr19:38057557_38062193_+(Nfatc3);circRNA_3283|Chr19:61714402_61714542_+(Itgb1);circRNA_6046|Chr7:64125692_64131186_-(Srgap1);	rno04360
rno04371	Apelin signaling pathway	Environmental Information Processing	Signal transduction	6	151	111	2681	0.603449	0.997288	0.959728	circRNA_0233|Chr1:128239552_128243030_-(Mef2a);circRNA_0591|Chr1:233578229_233581182_+(Gnaq);circRNA_0649|Chr1:252537818_252539458_-(Acta2);circRNA_0650|Chr1:252537894_252539495_+(Acta2);circRNA_3057|Chr18:72593000_72595275_+(Smad2);circRNA_4948|Chr4:180711145_180722357_-(Itpr2);	rno04371
rno04380	Osteoclast differentiation	Organismal Systems	Development and regeneration	2	151	64	2681	0.885018	0.997288	0.554843	circRNA_0125|Chr1:63842808_63920657_+(Lilrb3l);circRNA_4346|Chr3:122130941_122141403_+(Sirpa);	rno04380
rno04390	Hippo signaling pathway	Environmental Information Processing	Signal transduction	5	151	84	2681	0.517067	0.997288	1.05684	circRNA_0375|Chr1:177651557_177654228_+(Tead1);circRNA_1270|Chr10:110157631_110164041_-(Csnk1d);circRNA_1547|Chr12:13717791_13718009_-(Actb);circRNA_3057|Chr18:72593000_72595275_+(Smad2);circRNA_3152|Chr19:32214551_32215127_+(Smad1);	rno04390
rno04392	Hippo signaling pathway - multiple species	Environmental Information Processing	Signal transduction	1	151	26	2681	0.780086	0.997288	0.682883	circRNA_0375|Chr1:177651557_177654228_+(Tead1);	rno04392
rno04510	Focal adhesion	Cellular Processes	Cellular community - eukaryotes	11	151	192	2681	0.524108	0.997288	1.01721	circRNA_0647|Chr1:251455609_251485480_+(Pten);circRNA_1147|Chr10:82752455_82752793_+(Col1a1);circRNA_1547|Chr12:13717791_13718009_-(Actb);circRNA_1818|Chr13:77863217_77865781_-(Tnn);circRNA_3283|Chr19:61714402_61714542_+(Itgb1);circRNA_3733|Chr2:208198684_208203924_-(Rap1a);circRNA_3914|Chr20:12666784_12667523_+(Col6a1);circRNA_6001|Chr7:51425330_51432888_-(Ppp1r12a);circRNA_6935|Chr9:78911759_78…	rno04510
rno04512	ECM-receptor interaction	Environmental Information Processing	Signaling molecules and interaction	6	151	70	2681	0.19881	0.997288	1.52185	circRNA_1147|Chr10:82752455_82752793_+(Col1a1);circRNA_1818|Chr13:77863217_77865781_-(Tnn);circRNA_3283|Chr19:61714402_61714542_+(Itgb1);circRNA_3914|Chr20:12666784_12667523_+(Col6a1);circRNA_6935|Chr9:78911759_78911926_+(Fn1);circRNA_6937|Chr9:78945266_78947892_-(Fn1);	rno04512
rno04514	Cell adhesion molecules (CAMs)	Environmental Information Processing	Signaling molecules and interaction	3	151	51	2681	0.555427	0.997288	1.04441	circRNA_3283|Chr19:61714402_61714542_+(Itgb1);circRNA_3373|Chr2:30564530_30566431_-(Ocln);circRNA_3876|Chr20:4095939_4118506_+(RT1-Db1);	rno04514
rno04520	Adherens junction	Cellular Processes	Cellular community - eukaryotes	3	151	112	2681	0.957917	0.997288	0.475579	circRNA_0716|Chr1:259479327_259489683_-(Sorbs1);circRNA_1547|Chr12:13717791_13718009_-(Actb);circRNA_3057|Chr18:72593000_72595275_+(Smad2);	rno04520
rno04530	Tight junction	Cellular Processes	Cellular community - eukaryotes	6	151	118	2681	0.663701	0.997288	0.902795	circRNA_0038|Chr1:15545013_15551204_+(Map3k5);circRNA_1547|Chr12:13717791_13718009_-(Actb);circRNA_3283|Chr19:61714402_61714542_+(Itgb1);circRNA_3373|Chr2:30564530_30566431_-(Ocln);circRNA_3733|Chr2:208198684_208203924_-(Rap1a);circRNA_7047|Chr9:119309035_119311107_-(Myl12b);	rno04530
rno04540	Gap junction	Cellular Processes	Cellular community - eukaryotes	3	151	65	2681	0.719635	0.997288	0.81946	circRNA_0591|Chr1:233578229_233581182_+(Gnaq);circRNA_1270|Chr10:110157631_110164041_-(Csnk1d);circRNA_4948|Chr4:180711145_180722357_-(Itpr2);	rno04540
rno04550	Signaling pathways regulating pluripotency of stem cells	Cellular Processes	Cellular community - eukaryotes	5	151	60	2681	0.247085	0.997288	1.47958	circRNA_0447|Chr1:200606971_200615170_-(Fgfr2);circRNA_3057|Chr18:72593000_72595275_+(Smad2);circRNA_3152|Chr19:32214551_32215127_+(Smad1);circRNA_3223|Chr19:42856166_42920390_-(Zfhx3);circRNA_3225|Chr19:42917629_42920390_-(Zfhx3);	rno04550
rno04611	Platelet activation	Organismal Systems	Immune system	12	151	122	2681	0.0390455	0.673796	1.74639	circRNA_0591|Chr1:233578229_233581182_+(Gnaq);circRNA_1147|Chr10:82752455_82752793_+(Col1a1);circRNA_1547|Chr12:13717791_13718009_-(Actb);circRNA_3283|Chr19:61714402_61714542_+(Itgb1);circRNA_3733|Chr2:208198684_208203924_-(Rap1a);circRNA_4948|Chr4:180711145_180722357_-(Itpr2);circRNA_6001|Chr7:51425330_51432888_-(Ppp1r12a);circRNA_6825|Chr9:52043678_52045132_+(Col3a1);circRNA_6827|Chr9:52047552_…	rno04611
rno04612	Antigen processing and presentation	Organismal Systems	Immune system	2	151	23	2681	0.374926	0.997288	1.54391	circRNA_3876|Chr20:4095939_4118506_+(RT1-Db1);circRNA_3885|Chr20:4896892_4921063_-(Hspa1l);	rno04612
rno04621	NOD-like receptor signaling pathway	Organismal Systems	Immune system	2	151	64	2681	0.885018	0.997288	0.554843	circRNA_3367|Chr2:30384653_30433774_-(Naip6);circRNA_4948|Chr4:180711145_180722357_-(Itpr2);	rno04621
rno04625	C-type lectin receptor signaling pathway	Organismal Systems	Immune system	2	151	69	2681	0.909132	0.997288	0.514637	circRNA_3203|Chr19:38057557_38062193_+(Nfatc3);circRNA_4948|Chr4:180711145_180722357_-(Itpr2);	rno04625
rno04630	Jak-STAT signaling pathway	Environmental Information Processing	Signal transduction	1	151	52	2681	0.952374	0.997288	0.341442	circRNA_3670|Chr2:189226433_189230967_-(Il6r);	rno04630
rno04640	Hematopoietic cell lineage	Organismal Systems	Immune system	2	151	18	2681	0.26931	0.997288	1.97277	circRNA_3670|Chr2:189226433_189230967_-(Il6r);circRNA_3876|Chr20:4095939_4118506_+(RT1-Db1);	rno04640
rno04658	Th1 and Th2 cell differentiation	Organismal Systems	Immune system	3	151	43	2681	0.439947	0.997288	1.23872	circRNA_3203|Chr19:38057557_38062193_+(Nfatc3);circRNA_3876|Chr20:4095939_4118506_+(RT1-Db1);circRNA_6275|Chr8:12160079_12161683_+(Maml2);	rno04658
rno04659	Th17 cell differentiation	Organismal Systems	Immune system	4	151	61	2681	0.453131	0.997288	1.16426	circRNA_3057|Chr18:72593000_72595275_+(Smad2);circRNA_3203|Chr19:38057557_38062193_+(Nfatc3);circRNA_3670|Chr2:189226433_189230967_-(Il6r);circRNA_3876|Chr20:4095939_4118506_+(RT1-Db1);	rno04659
rno04660	T cell receptor signaling pathway	Organismal Systems	Immune system	1	151	80	2681	0.99099	0.997288	0.221937	circRNA_3203|Chr19:38057557_38062193_+(Nfatc3);	rno04660
rno04662	B cell receptor signaling pathway	Organismal Systems	Immune system	1	151	58	2681	0.966615	0.997288	0.30612	circRNA_3203|Chr19:38057557_38062193_+(Nfatc3);	rno04662
rno04666	Fc gamma R-mediated phagocytosis	Organismal Systems	Immune system	1	151	51	2681	0.949473	0.997288	0.348137	circRNA_3514|Chr2:113744312_113745181_+(Pld1);	rno04666
rno04668	TNF signaling pathway	Environmental Information Processing	Signal transduction	3	151	65	2681	0.719635	0.997288	0.81946	circRNA_0038|Chr1:15545013_15551204_+(Map3k5);circRNA_4669|Chr4:64894605_64899587_-(Creb3l2);circRNA_5806|Chr6:124625936_124680274_-(Rps6ka5);	rno04668
rno04670	Leukocyte transendothelial migration	Organismal Systems	Immune system	5	151	63	2681	0.279931	0.997288	1.40912	circRNA_1547|Chr12:13717791_13718009_-(Actb);circRNA_3283|Chr19:61714402_61714542_+(Itgb1);circRNA_3373|Chr2:30564530_30566431_-(Ocln);circRNA_3733|Chr2:208198684_208203924_-(Rap1a);circRNA_7047|Chr9:119309035_119311107_-(Myl12b);	rno04670
rno04710	Circadian rhythm	Organismal Systems	Environmental adaptation	1	151	9	2681	0.406987	0.997288	1.97277	circRNA_1270|Chr10:110157631_110164041_-(Csnk1d);	rno04710
rno04713	Circadian entrainment	Organismal Systems	Environmental adaptation	3	151	77	2681	0.819578	0.997288	0.691752	circRNA_0591|Chr1:233578229_233581182_+(Gnaq);circRNA_4863|Chr4:151118221_151123637_-(Cacna1c);circRNA_5806|Chr6:124625936_124680274_-(Rps6ka5);	rno04713
rno04714	Thermogenesis	Organismal Systems	Environmental adaptation	4	151	74	2681	0.607949	0.997288	0.959728	circRNA_0038|Chr1:15545013_15551204_+(Map3k5);circRNA_1547|Chr12:13717791_13718009_-(Actb);circRNA_3087|Chr18:79813606_79815529_+(Zfp516);circRNA_4669|Chr4:64894605_64899587_-(Creb3l2);	rno04714
rno04720	Long-term potentiation	Organismal Systems	Nervous system	4	151	77	2681	0.639739	0.997288	0.922336	circRNA_0591|Chr1:233578229_233581182_+(Gnaq);circRNA_3733|Chr2:208198684_208203924_-(Rap1a);circRNA_4863|Chr4:151118221_151123637_-(Cacna1c);circRNA_4948|Chr4:180711145_180722357_-(Itpr2);	rno04720
rno04722	Neurotrophin signaling pathway	Organismal Systems	Nervous system	6	151	90	2681	0.396477	0.997288	1.18366	circRNA_0038|Chr1:15545013_15551204_+(Map3k5);circRNA_1265|Chr10:109754865_109755050_+(Arhgdia);circRNA_1266|Chr10:109754888_109755050_+(Arhgdia);circRNA_1267|Chr10:109754906_109755050_+(Arhgdia);circRNA_3733|Chr2:208198684_208203924_-(Rap1a);circRNA_5806|Chr6:124625936_124680274_-(Rps6ka5);	rno04722
rno04723	Retrograde endocannabinoid signaling	Organismal Systems	Nervous system	3	151	54	2681	0.594981	0.997288	0.986387	circRNA_0591|Chr1:233578229_233581182_+(Gnaq);circRNA_4863|Chr4:151118221_151123637_-(Cacna1c);circRNA_4948|Chr4:180711145_180722357_-(Itpr2);	rno04723
rno04724	Glutamatergic synapse	Organismal Systems	Nervous system	5	151	77	2681	0.439333	0.997288	1.15292	circRNA_0591|Chr1:233578229_233581182_+(Gnaq);circRNA_3514|Chr2:113744312_113745181_+(Pld1);circRNA_4863|Chr4:151118221_151123637_-(Cacna1c);circRNA_4948|Chr4:180711145_180722357_-(Itpr2);circRNA_6219|Chr7:130522030_130524289_+(Shank3);	rno04724
rno04725	Cholinergic synapse	Organismal Systems	Nervous system	4	151	61	2681	0.453131	0.997288	1.16426	circRNA_0591|Chr1:233578229_233581182_+(Gnaq);circRNA_4669|Chr4:64894605_64899587_-(Creb3l2);circRNA_4863|Chr4:151118221_151123637_-(Cacna1c);circRNA_4948|Chr4:180711145_180722357_-(Itpr2);	rno04725
rno04726	Serotonergic synapse	Organismal Systems	Nervous system	4	151	59	2681	0.427447	0.997288	1.20373	circRNA_0591|Chr1:233578229_233581182_+(Gnaq);circRNA_4863|Chr4:151118221_151123637_-(Cacna1c);circRNA_4948|Chr4:180711145_180722357_-(Itpr2);circRNA_5223|Chr5:115146569_115199307_-(Cyp2j3);	rno04726
rno04727	GABAergic synapse	Organismal Systems	Nervous system	1	151	35	2681	0.870274	0.997288	0.507285	circRNA_4863|Chr4:151118221_151123637_-(Cacna1c);	rno04727
rno04728	Dopaminergic synapse	Organismal Systems	Nervous system	5	151	85	2681	0.52783	0.997288	1.04441	circRNA_0591|Chr1:233578229_233581182_+(Gnaq);circRNA_2726|Chr17:54209230_54209739_+(Kif5b);circRNA_4669|Chr4:64894605_64899587_-(Creb3l2);circRNA_4863|Chr4:151118221_151123637_-(Cacna1c);circRNA_4948|Chr4:180711145_180722357_-(Itpr2);	rno04728
rno04730	Long-term depression	Organismal Systems	Nervous system	2	151	48	2681	0.763583	0.997288	0.73979	circRNA_0591|Chr1:233578229_233581182_+(Gnaq);circRNA_4948|Chr4:180711145_180722357_-(Itpr2);	rno04730
rno04742	Taste transduction	Organismal Systems	Sensory system	1	151	8	2681	0.371481	0.997288	2.21937	circRNA_4863|Chr4:151118221_151123637_-(Cacna1c);	rno04742
rno04750	Inflammatory mediator regulation of TRP channels	Organismal Systems	Sensory system	3	151	52	2681	0.568863	0.997288	1.02433	circRNA_0591|Chr1:233578229_233581182_+(Gnaq);circRNA_4948|Chr4:180711145_180722357_-(Itpr2);circRNA_5223|Chr5:115146569_115199307_-(Cyp2j3);	rno04750
rno04810	Regulation of actin cytoskeleton	Cellular Processes	Cell motility	16	151	174	2681	0.0325188	0.673796	1.63264	circRNA_0447|Chr1:200606971_200615170_-(Fgfr2);circRNA_1029|Chr10:62751173_62767418_-(Ssh2);circRNA_1547|Chr12:13717791_13718009_-(Actb);circRNA_1878|Chr13:100347405_100353039_-(Enah);circRNA_2304|Chr15:41008529_41011344_+(Spata13);circRNA_2375|Chr15:70077466_70105489_-(Diaph3);circRNA_2377|Chr15:70098761_70105489_-(Diaph3);circRNA_2378|Chr15:70098761_70139170_-(Diaph3);circRNA_3283|Chr19:6171440…	rno04810
rno04910	Insulin signaling pathway	Organismal Systems	Endocrine system	1	151	100	2681	0.997288	0.997288	0.17755	circRNA_0716|Chr1:259479327_259489683_-(Sorbs1);	rno04910
rno04911	Insulin secretion	Organismal Systems	Endocrine system	3	151	56	2681	0.620063	0.997288	0.951159	circRNA_0591|Chr1:233578229_233581182_+(Gnaq);circRNA_4669|Chr4:64894605_64899587_-(Creb3l2);circRNA_4863|Chr4:151118221_151123637_-(Cacna1c);	rno04911
rno04912	GnRH signaling pathway	Organismal Systems	Endocrine system	4	151	83	2681	0.698168	0.997288	0.855661	circRNA_0591|Chr1:233578229_233581182_+(Gnaq);circRNA_3514|Chr2:113744312_113745181_+(Pld1);circRNA_4863|Chr4:151118221_151123637_-(Cacna1c);circRNA_4948|Chr4:180711145_180722357_-(Itpr2);	rno04912
rno04913	Ovarian Steroidogenesis	Organismal Systems	Endocrine system	1	151	19	2681	0.668877	0.997288	0.934472	circRNA_5223|Chr5:115146569_115199307_-(Cyp2j3);	rno04913
rno04915	Estrogen signaling pathway	Organismal Systems	Endocrine system	5	151	67	2681	0.32495	0.997288	1.325	circRNA_0591|Chr1:233578229_233581182_+(Gnaq);circRNA_1185|Chr10:88046855_88047023_+(Krt15);circRNA_3885|Chr20:4896892_4921063_-(Hspa1l);circRNA_4669|Chr4:64894605_64899587_-(Creb3l2);circRNA_4948|Chr4:180711145_180722357_-(Itpr2);	rno04915
rno04916	Melanogenesis	Organismal Systems	Endocrine system	2	151	48	2681	0.763583	0.997288	0.73979	circRNA_0591|Chr1:233578229_233581182_+(Gnaq);circRNA_4669|Chr4:64894605_64899587_-(Creb3l2);	rno04916
rno04918	Thyroid hormone synthesis	Organismal Systems	Endocrine system	3	151	46	2681	0.484769	0.997288	1.15793	circRNA_0591|Chr1:233578229_233581182_+(Gnaq);circRNA_4669|Chr4:64894605_64899587_-(Creb3l2);circRNA_4948|Chr4:180711145_180722357_-(Itpr2);	rno04918
rno04919	Thyroid hormone signaling pathway	Organismal Systems	Endocrine system	2	151	88	2681	0.96407	0.997288	0.403522	circRNA_1547|Chr12:13717791_13718009_-(Actb);circRNA_1658|Chr12:43576497_43576734_-(Med13l);	rno04919
rno04921	Oxytocin signaling pathway	Organismal Systems	Endocrine system	6	151	140	2681	0.813246	0.997288	0.760927	circRNA_0591|Chr1:233578229_233581182_+(Gnaq);circRNA_1547|Chr12:13717791_13718009_-(Actb);circRNA_3203|Chr19:38057557_38062193_+(Nfatc3);circRNA_4863|Chr4:151118221_151123637_-(Cacna1c);circRNA_4948|Chr4:180711145_180722357_-(Itpr2);circRNA_6001|Chr7:51425330_51432888_-(Ppp1r12a);	rno04921
rno04922	Glucagon signaling pathway	Organismal Systems	Endocrine system	4	151	88	2681	0.741486	0.997288	0.807044	circRNA_0591|Chr1:233578229_233581182_+(Gnaq);circRNA_0722|Chr1:261165387_261165588_-(Pgam1);circRNA_4669|Chr4:64894605_64899587_-(Creb3l2);circRNA_4948|Chr4:180711145_180722357_-(Itpr2);	rno04922
rno04924	Renin secretion	Organismal Systems	Endocrine system	3	151	65	2681	0.719635	0.997288	0.81946	circRNA_0591|Chr1:233578229_233581182_+(Gnaq);circRNA_4863|Chr4:151118221_151123637_-(Cacna1c);circRNA_4948|Chr4:180711145_180722357_-(Itpr2);	rno04924
rno04925	Aldosterone synthesis and secretion	Organismal Systems	Endocrine system	6	151	62	2681	0.133064	0.993228	1.71822	circRNA_0591|Chr1:233578229_233581182_+(Gnaq);circRNA_4669|Chr4:64894605_64899587_-(Creb3l2);circRNA_4863|Chr4:151118221_151123637_-(Cacna1c);circRNA_4948|Chr4:180711145_180722357_-(Itpr2);circRNA_5986|Chr7:41167312_41167751_+(Atp2b1);circRNA_5987|Chr7:41167312_41178782_+(Atp2b1);	rno04925
rno04926	Relaxin signaling pathway	Organismal Systems	Endocrine system	9	151	104	2681	0.127964	0.990538	1.53649	circRNA_0649|Chr1:252537818_252539458_-(Acta2);circRNA_0650|Chr1:252537894_252539495_+(Acta2);circRNA_1147|Chr10:82752455_82752793_+(Col1a1);circRNA_3057|Chr18:72593000_72595275_+(Smad2);circRNA_4669|Chr4:64894605_64899587_-(Creb3l2);circRNA_6825|Chr9:52043678_52045132_+(Col3a1);circRNA_6827|Chr9:52047552_52047844_+(Col3a1);circRNA_6828|Chr9:52047552_52048745_+(Col3a1);circRNA_6830|Chr9:52048089_…	rno04926
rno04927	Cortisol synthesis and secretion	Organismal Systems	Endocrine system	5	151	49	2681	0.138671	0.997288	1.81173	circRNA_0591|Chr1:233578229_233581182_+(Gnaq);circRNA_4669|Chr4:64894605_64899587_-(Creb3l2);circRNA_4863|Chr4:151118221_151123637_-(Cacna1c);circRNA_4948|Chr4:180711145_180722357_-(Itpr2);circRNA_6157|Chr7:116072198_116158807_-(Cyp11b3);	rno04927
rno04930	Type II diabetes mellitus	Human Diseases	Endocrine and metabolic disease	1	151	18	2681	0.648973	0.997288	0.986387	circRNA_4863|Chr4:151118221_151123637_-(Cacna1c);	rno04930
rno04931	Insulin resistance	Human Diseases	Endocrine and metabolic disease	2	151	51	2681	0.792576	0.997288	0.696273	circRNA_0647|Chr1:251455609_251485480_+(Pten);circRNA_4669|Chr4:64894605_64899587_-(Creb3l2);	rno04931
rno04932	Non-alcoholic fatty liver disease (NAFLD)	Human Diseases	Endocrine and metabolic disease	2	151	59	2681	0.855144	0.997288	0.601863	circRNA_0038|Chr1:15545013_15551204_+(Map3k5);circRNA_3670|Chr2:189226433_189230967_-(Il6r);	rno04932
rno04933	AGE-RAGE signaling pathway in diabetic complications	Human Diseases	Endocrine and metabolic disease	8	151	94	2681	0.156339	0.997288	1.51106	circRNA_1147|Chr10:82752455_82752793_+(Col1a1);circRNA_3057|Chr18:72593000_72595275_+(Smad2);circRNA_6825|Chr9:52043678_52045132_+(Col3a1);circRNA_6827|Chr9:52047552_52047844_+(Col3a1);circRNA_6828|Chr9:52047552_52048745_+(Col3a1);circRNA_6830|Chr9:52048089_52048881_+(Col3a1);circRNA_6935|Chr9:78911759_78911926_+(Fn1);circRNA_6937|Chr9:78945266_78947892_-(Fn1);	rno04933
rno04934	Cushing's syndrome	Human Diseases	Endocrine and metabolic disease	7	151	79	2681	0.153721	0.997288	1.57322	circRNA_0591|Chr1:233578229_233581182_+(Gnaq);circRNA_3733|Chr2:208198684_208203924_-(Rap1a);circRNA_4669|Chr4:64894605_64899587_-(Creb3l2);circRNA_4863|Chr4:151118221_151123637_-(Cacna1c);circRNA_4948|Chr4:180711145_180722357_-(Itpr2);circRNA_6157|Chr7:116072198_116158807_-(Cyp11b3);circRNA_6243|Chr7:140533891_140536242_-(Kmt2d);	rno04934
rno04940	Type I diabetes mellitus	Human Diseases	Endocrine and metabolic disease	1	151	15	2681	0.581846	0.997288	1.18366	circRNA_3876|Chr20:4095939_4118506_+(RT1-Db1);	rno04940
rno04961	Endocrine and other factor-regulated calcium reabsorption	Organismal Systems	Excretory system	3	151	39	2681	0.378129	0.997288	1.36577	circRNA_0591|Chr1:233578229_233581182_+(Gnaq);circRNA_5986|Chr7:41167312_41167751_+(Atp2b1);circRNA_5987|Chr7:41167312_41178782_+(Atp2b1);	rno04961
rno04962	Vasopressin-regulated water reabsorption	Organismal Systems	Excretory system	4	151	13	2681	0.00463667	0.338714	5.46307	circRNA_1265|Chr10:109754865_109755050_+(Arhgdia);circRNA_1266|Chr10:109754888_109755050_+(Arhgdia);circRNA_1267|Chr10:109754906_109755050_+(Arhgdia);circRNA_4669|Chr4:64894605_64899587_-(Creb3l2);	rno04962
rno04970	Salivary secretion	Organismal Systems	Digestive system	4	151	67	2681	0.527643	0.997288	1.06	circRNA_0591|Chr1:233578229_233581182_+(Gnaq);circRNA_4948|Chr4:180711145_180722357_-(Itpr2);circRNA_5986|Chr7:41167312_41167751_+(Atp2b1);circRNA_5987|Chr7:41167312_41178782_+(Atp2b1);	rno04970
rno04971	Gastric acid secretion	Organismal Systems	Digestive system	3	151	49	2681	0.527835	0.997288	1.08704	circRNA_0591|Chr1:233578229_233581182_+(Gnaq);circRNA_1547|Chr12:13717791_13718009_-(Actb);circRNA_4948|Chr4:180711145_180722357_-(Itpr2);	rno04971
rno04972	Pancreatic secretion	Organismal Systems	Digestive system	5	151	55	2681	0.195012	0.997288	1.61409	circRNA_0591|Chr1:233578229_233581182_+(Gnaq);circRNA_3733|Chr2:208198684_208203924_-(Rap1a);circRNA_4948|Chr4:180711145_180722357_-(Itpr2);circRNA_5986|Chr7:41167312_41167751_+(Atp2b1);circRNA_5987|Chr7:41167312_41178782_+(Atp2b1);	rno04972
rno04974	Protein digestion and absorption	Organismal Systems	Digestive system	8	151	58	2681	0.0145611	0.507213	2.44896	circRNA_1147|Chr10:82752455_82752793_+(Col1a1);circRNA_3914|Chr20:12666784_12667523_+(Col6a1);circRNA_4051|Chr3:6464953_6472752_+(Col5a1);circRNA_6551|Chr8:87100666_87102375_-(Col12a1);circRNA_6825|Chr9:52043678_52045132_+(Col3a1);circRNA_6827|Chr9:52047552_52047844_+(Col3a1);circRNA_6828|Chr9:52047552_52048745_+(Col3a1);circRNA_6830|Chr9:52048089_52048881_+(Col3a1);	rno04974
rno04977	Vitamin digestion and absorption	Organismal Systems	Digestive system	1	151	8	2681	0.371481	0.997288	2.21937	circRNA_5564|Chr6:25409775_25417047_-(Plb1);	rno04977
rno04978	Mineral absorption	Organismal Systems	Digestive system	2	151	11	2681	0.124195	0.990538	3.22818	circRNA_5986|Chr7:41167312_41167751_+(Atp2b1);circRNA_5987|Chr7:41167312_41178782_+(Atp2b1);	rno04978
rno05010	Alzheimer's disease	Human Diseases	Neurodegenerative disease	3	151	92	2681	0.900694	0.997288	0.578966	circRNA_0591|Chr1:233578229_233581182_+(Gnaq);circRNA_4863|Chr4:151118221_151123637_-(Cacna1c);circRNA_4948|Chr4:180711145_180722357_-(Itpr2);	rno05010
rno05014	Amyotrophic lateral sclerosis (ALS)	Human Diseases	Neurodegenerative disease	1	151	30	2681	0.82603	0.997288	0.591832	circRNA_0038|Chr1:15545013_15551204_+(Map3k5);	rno05014
rno05016	Huntington's disease	Human Diseases	Neurodegenerative disease	2	151	61	2681	0.867853	0.997288	0.58213	circRNA_0591|Chr1:233578229_233581182_+(Gnaq);circRNA_4669|Chr4:64894605_64899587_-(Creb3l2);	rno05016
rno05030	Cocaine addiction	Human Diseases	Substance dependence	1	151	15	2681	0.581846	0.997288	1.18366	circRNA_4669|Chr4:64894605_64899587_-(Creb3l2);	rno05030
rno05031	Amphetamine addiction	Human Diseases	Substance dependence	2	151	45	2681	0.73117	0.997288	0.78911	circRNA_4669|Chr4:64894605_64899587_-(Creb3l2);circRNA_4863|Chr4:151118221_151123637_-(Cacna1c);	rno05031
rno05034	Alcoholism	Human Diseases	Substance dependence	1	151	36	2681	0.877677	0.997288	0.493194	circRNA_4669|Chr4:64894605_64899587_-(Creb3l2);	rno05034
rno05100	Bacterial invasion of epithelial cells	Human Diseases	Infectious disease: bacterial	5	151	89	2681	0.569796	0.997288	0.99747	circRNA_1255|Chr10:106264856_106265494_+(Sept9);circRNA_1547|Chr12:13717791_13718009_-(Actb);circRNA_3283|Chr19:61714402_61714542_+(Itgb1);circRNA_6935|Chr9:78911759_78911926_+(Fn1);circRNA_6937|Chr9:78945266_78947892_-(Fn1);	rno05100
rno05132	Salmonella infection	Human Diseases	Infectious disease: bacterial	1	151	42	2681	0.914063	0.997288	0.422737	circRNA_1547|Chr12:13717791_13718009_-(Actb);	rno05132
rno05133	Pertussis	Human Diseases	Infectious disease: bacterial	1	151	17	2681	0.62788	0.997288	1.04441	circRNA_3283|Chr19:61714402_61714542_+(Itgb1);	rno05133
rno05134	Legionellosis	Human Diseases	Infectious disease: bacterial	2	151	13	2681	0.163876	0.997288	2.73153	circRNA_3367|Chr2:30384653_30433774_-(Naip6);circRNA_3885|Chr20:4896892_4921063_-(Hspa1l);	rno05134
rno05140	Leishmaniasis	Human Diseases	Infectious disease: parasitic	2	151	13	2681	0.163876	0.997288	2.73153	circRNA_3283|Chr19:61714402_61714542_+(Itgb1);circRNA_3876|Chr20:4095939_4118506_+(RT1-Db1);	rno05140
rno05142	Chagas disease (American trypanosomiasis)	Human Diseases	Infectious disease: parasitic	2	151	52	2681	0.801524	0.997288	0.682883	circRNA_0591|Chr1:233578229_233581182_+(Gnaq);circRNA_3057|Chr18:72593000_72595275_+(Smad2);	rno05142
rno05143	African trypanosomiasis	Human Diseases	Infectious disease: parasitic	3	151	17	2681	0.0666205	0.808921	3.13323	circRNA_0591|Chr1:233578229_233581182_+(Gnaq);circRNA_0868|Chr10:15577563_15589574_-(Hba-a1);circRNA_0869|Chr10:15577563_15603016_-(Hba-a1);	rno05143
rno05144	Malaria	Human Diseases	Infectious disease: parasitic	2	151	6	2681	0.0406958	0.673796	5.91832	circRNA_0868|Chr10:15577563_15589574_-(Hba-a1);circRNA_0869|Chr10:15577563_15603016_-(Hba-a1);	rno05144
rno05145	Toxoplasmosis	Human Diseases	Infectious disease: parasitic	3	151	34	2681	0.299309	0.997288	1.56661	circRNA_3283|Chr19:61714402_61714542_+(Itgb1);circRNA_3876|Chr20:4095939_4118506_+(RT1-Db1);circRNA_3885|Chr20:4896892_4921063_-(Hspa1l);	rno05145
rno05146	Amoebiasis	Human Diseases	Infectious disease: parasitic	8	151	79	2681	0.0735383	0.808921	1.79797	circRNA_0591|Chr1:233578229_233581182_+(Gnaq);circRNA_1147|Chr10:82752455_82752793_+(Col1a1);circRNA_6825|Chr9:52043678_52045132_+(Col3a1);circRNA_6827|Chr9:52047552_52047844_+(Col3a1);circRNA_6828|Chr9:52047552_52048745_+(Col3a1);circRNA_6830|Chr9:52048089_52048881_+(Col3a1);circRNA_6935|Chr9:78911759_78911926_+(Fn1);circRNA_6937|Chr9:78945266_78947892_-(Fn1);	rno05146
rno05150	Staphylococcus aureus infection	Human Diseases	Infectious disease: bacterial	1	151	6	2681	0.294012	0.997288	2.95916	circRNA_3876|Chr20:4095939_4118506_+(RT1-Db1);	rno05150
rno05152	Tuberculosis	Human Diseases	Infectious disease: bacterial	1	151	81	2681	0.991513	0.997288	0.219197	circRNA_3876|Chr20:4095939_4118506_+(RT1-Db1);	rno05152
rno05160	Hepatitis C	Human Diseases	Infectious disease: viral	1	151	59	2681	0.968537	0.997288	0.300932	circRNA_3373|Chr2:30564530_30566431_-(Ocln);	rno05160
rno05161	Hepatitis B	Human Diseases	Infectious disease: viral	3	151	79	2681	0.832931	0.997288	0.674239	circRNA_0647|Chr1:251455609_251485480_+(Pten);circRNA_3203|Chr19:38057557_38062193_+(Nfatc3);circRNA_4669|Chr4:64894605_64899587_-(Creb3l2);	rno05161
rno05162	Measles	Human Diseases	Infectious disease: viral	1	151	28	2681	0.804393	0.997288	0.634106	circRNA_3885|Chr20:4896892_4921063_-(Hspa1l);	rno05162
rno05164	Influenza A	Human Diseases	Infectious disease: viral	3	151	67	2681	0.738809	0.997288	0.794999	circRNA_1547|Chr12:13717791_13718009_-(Actb);circRNA_3876|Chr20:4095939_4118506_+(RT1-Db1);circRNA_3885|Chr20:4896892_4921063_-(Hspa1l);	rno05164
rno05165	Human papillomavirus infection	Human Diseases	Infectious disease: viral	11	151	188	2681	0.494731	0.997288	1.03885	circRNA_0647|Chr1:251455609_251485480_+(Pten);circRNA_1147|Chr10:82752455_82752793_+(Col1a1);circRNA_1188|Chr10:89036545_89074755_+(Tubg2);circRNA_1818|Chr13:77863217_77865781_-(Tnn);circRNA_3283|Chr19:61714402_61714542_+(Itgb1);circRNA_3914|Chr20:12666784_12667523_+(Col6a1);circRNA_4669|Chr4:64894605_64899587_-(Creb3l2);circRNA_6169|Chr7:119987740_119990307_-(Mfng);circRNA_6275|Chr8:12160079_121…	rno05165
rno05166	HTLV-I infection	Human Diseases	Infectious disease: viral	3	151	143	2681	0.990002	0.997288	0.372482	circRNA_3057|Chr18:72593000_72595275_+(Smad2);circRNA_3203|Chr19:38057557_38062193_+(Nfatc3);circRNA_3876|Chr20:4095939_4118506_+(RT1-Db1);	rno05166
rno05167	Kaposi's sarcoma-associated herpesvirus infection	Human Diseases	Infectious disease: viral	2	151	98	2681	0.978335	0.997288	0.362346	circRNA_3203|Chr19:38057557_38062193_+(Nfatc3);circRNA_4948|Chr4:180711145_180722357_-(Itpr2);	rno05167
rno05168	Herpes simplex infection	Human Diseases	Infectious disease: viral	1	151	64	2681	0.976617	0.997288	0.277421	circRNA_3876|Chr20:4095939_4118506_+(RT1-Db1);	rno05168
rno05169	Epstein-Barr virus infection	Human Diseases	Infectious disease: viral	1	151	93	2681	0.995867	0.997288	0.190914	circRNA_3885|Chr20:4896892_4921063_-(Hspa1l);	rno05169
rno05200	Pathways in cancer	Human Diseases	Cancer: overview	13	151	258	2681	0.710058	0.997288	0.89463	circRNA_0447|Chr1:200606971_200615170_-(Fgfr2);circRNA_0591|Chr1:233578229_233581182_+(Gnaq);circRNA_0647|Chr1:251455609_251485480_+(Pten);circRNA_3057|Chr18:72593000_72595275_+(Smad2);circRNA_3283|Chr19:61714402_61714542_+(Itgb1);circRNA_3670|Chr2:189226433_189230967_-(Il6r);circRNA_3738|Chr2:210723584_210806489_-(Gstm7);circRNA_3744|Chr2:210806416_210806638_+(Gstm1);circRNA_3745|Chr2:210808354_…	rno05200
rno05202	Transcriptional misregulation in cancers	Human Diseases	Cancer: overview	8	151	93	2681	0.149781	0.997288	1.52731	circRNA_1949|Chr14:7291691_7293326_-(Aff1);circRNA_2865|Chr18:6047215_6051719_-(Ss18);circRNA_3152|Chr19:32214551_32215127_+(Smad1);circRNA_3634|Chr2:187243578_187246451_-(Prcc);circRNA_3944|Chr20:22822066_22856689_-(Jmjd1c);circRNA_5208|Chr5:106171074_106171781_-(Mllt3);circRNA_6753|Chr9:18653895_18660843_+(Runx2);circRNA_7065|ChrX:4819220_4832241_-(NEWGENE_1565481);	rno05202
rno05203	Viral carcinogenesis	Human Diseases	Cancer: overview	1	151	84	2681	0.992908	0.997288	0.211369	circRNA_4669|Chr4:64894605_64899587_-(Creb3l2);	rno05203
rno05204	Chemical carcinogenesis	Human Diseases	Cancer: overview	4	151	15	2681	0.00810319	0.338714	4.73466	circRNA_1993|Chr14:22619364_22655924_+(Ugt2b7);circRNA_3738|Chr2:210723584_210806489_-(Gstm7);circRNA_3744|Chr2:210806416_210806638_+(Gstm1);circRNA_3745|Chr2:210808354_210822401_-(Gstm1);	rno05204
rno05205	Proteoglycans in cancer	Human Diseases	Cancer: overview	9	151	166	2681	0.599761	0.997288	0.962619	circRNA_0758|Chr1:274628955_274647456_+(Pdcd4);circRNA_1547|Chr12:13717791_13718009_-(Actb);circRNA_3057|Chr18:72593000_72595275_+(Smad2);circRNA_3283|Chr19:61714402_61714542_+(Itgb1);circRNA_4948|Chr4:180711145_180722357_-(Itpr2);circRNA_5945|Chr7:23546534_23546690_+(Timp3);circRNA_6001|Chr7:51425330_51432888_-(Ppp1r12a);circRNA_6935|Chr9:78911759_78911926_+(Fn1);circRNA_6937|Chr9:78945266_78947…	rno05205
rno05206	MicroRNAs in cancer	Human Diseases	Cancer: overview	5	151	82	2681	0.495251	0.997288	1.08262	circRNA_0647|Chr1:251455609_251485480_+(Pten);circRNA_0758|Chr1:274628955_274647456_+(Pdcd4);circRNA_1818|Chr13:77863217_77865781_-(Tnn);circRNA_5806|Chr6:124625936_124680274_-(Rps6ka5);circRNA_5945|Chr7:23546534_23546690_+(Timp3);	rno05206
rno05210	Colorectal cancer	Human Diseases	Cancer: specific types	2	151	61	2681	0.867853	0.997288	0.58213	circRNA_3057|Chr18:72593000_72595275_+(Smad2);circRNA_5526|Chr6:11219826_11221789_-(Msh2);	rno05210
rno05211	Renal cell carcinoma	Human Diseases	Cancer: specific types	2	151	52	2681	0.801524	0.997288	0.682883	circRNA_3634|Chr2:187243578_187246451_-(Prcc);circRNA_3733|Chr2:208198684_208203924_-(Rap1a);	rno05211
rno05212	Pancreatic cancer	Human Diseases	Cancer: specific types	2	151	61	2681	0.867853	0.997288	0.58213	circRNA_3057|Chr18:72593000_72595275_+(Smad2);circRNA_3514|Chr2:113744312_113745181_+(Pld1);	rno05212
rno05213	Endometrial cancer	Human Diseases	Cancer: specific types	1	151	43	2681	0.91898	0.997288	0.412906	circRNA_0647|Chr1:251455609_251485480_+(Pten);	rno05213
rno05214	Glioma	Human Diseases	Cancer: specific types	1	151	47	2681	0.936006	0.997288	0.377765	circRNA_0647|Chr1:251455609_251485480_+(Pten);	rno05214
rno05215	Prostate cancer	Human Diseases	Cancer: specific types	3	151	62	2681	0.688877	0.997288	0.859111	circRNA_0447|Chr1:200606971_200615170_-(Fgfr2);circRNA_0647|Chr1:251455609_251485480_+(Pten);circRNA_4669|Chr4:64894605_64899587_-(Creb3l2);	rno05215
rno05218	Melanoma	Human Diseases	Cancer: specific types	1	151	38	2681	0.891248	0.997288	0.467236	circRNA_0647|Chr1:251455609_251485480_+(Pten);	rno05218
rno05219	Bladder cancer	Human Diseases	Cancer: specific types	1	151	27	2681	0.792593	0.997288	0.657591	circRNA_5806|Chr6:124625936_124680274_-(Rps6ka5);	rno05219
rno05222	Small cell lung cancer	Human Diseases	Cancer: specific types	4	151	62	2681	0.465838	0.997288	1.14548	circRNA_0647|Chr1:251455609_251485480_+(Pten);circRNA_3283|Chr19:61714402_61714542_+(Itgb1);circRNA_6935|Chr9:78911759_78911926_+(Fn1);circRNA_6937|Chr9:78945266_78947892_-(Fn1);	rno05222
rno05224	Breast cancer	Human Diseases	Cancer: specific types	1	151	57	2681	0.964576	0.997288	0.311491	circRNA_0647|Chr1:251455609_251485480_+(Pten);	rno05224
rno05225	Hepatocellular carcinoma	Human Diseases	Cancer: specific types	6	151	102	2681	0.518427	0.997288	1.04441	circRNA_0647|Chr1:251455609_251485480_+(Pten);circRNA_1547|Chr12:13717791_13718009_-(Actb);circRNA_3057|Chr18:72593000_72595275_+(Smad2);circRNA_3738|Chr2:210723584_210806489_-(Gstm7);circRNA_3744|Chr2:210806416_210806638_+(Gstm1);circRNA_3745|Chr2:210808354_210822401_-(Gstm1);	rno05225
rno05226	Gastric cancer	Human Diseases	Cancer: specific types	2	151	76	2681	0.935072	0.997288	0.467236	circRNA_0447|Chr1:200606971_200615170_-(Fgfr2);circRNA_3057|Chr18:72593000_72595275_+(Smad2);	rno05226
rno05230	Central carbon metabolism in cancer	Human Diseases	Cancer: overview	3	151	34	2681	0.299309	0.997288	1.56661	circRNA_0447|Chr1:200606971_200615170_-(Fgfr2);circRNA_0647|Chr1:251455609_251485480_+(Pten);circRNA_0722|Chr1:261165387_261165588_-(Pgam1);	rno05230
rno05231	Choline metabolism in cancer	Human Diseases	Cancer: overview	1	151	61	2681	0.972057	0.997288	0.291065	circRNA_3514|Chr2:113744312_113745181_+(Pld1);	rno05231
rno05320	Autoimmune thyroid disease	Human Diseases	Immune disease	1	151	11	2681	0.472129	0.997288	1.61409	circRNA_3876|Chr20:4095939_4118506_+(RT1-Db1);	rno05320
rno05321	Inflammatiory bowel disease (IBD)	Human Diseases	Immune disease	2	151	14	2681	0.184469	0.997288	2.53642	circRNA_3057|Chr18:72593000_72595275_+(Smad2);circRNA_3876|Chr20:4095939_4118506_+(RT1-Db1);	rno05321
rno05322	Systemic lupus erythematosus	Human Diseases	Immune disease	1	151	10	2681	0.440499	0.997288	1.7755	circRNA_3876|Chr20:4095939_4118506_+(RT1-Db1);	rno05322
rno05323	Rheumatoid arthritis	Human Diseases	Immune disease	1	151	17	2681	0.62788	0.997288	1.04441	circRNA_3876|Chr20:4095939_4118506_+(RT1-Db1);	rno05323
rno05330	Allograft rejection	Human Diseases	Immune disease	1	151	11	2681	0.472129	0.997288	1.61409	circRNA_3876|Chr20:4095939_4118506_+(RT1-Db1);	rno05330
rno05332	Graft-versus-host disease	Human Diseases	Immune disease	1	151	11	2681	0.472129	0.997288	1.61409	circRNA_3876|Chr20:4095939_4118506_+(RT1-Db1);	rno05332
rno05410	Hypertrophic cardiomyopathy (HCM)	Human Diseases	Cardiovascular disease	6	151	60	2681	0.118535	0.990538	1.7755	circRNA_1547|Chr12:13717791_13718009_-(Actb);circRNA_1738|Chr13:52667988_52673721_+(Tnnt2);circRNA_3283|Chr19:61714402_61714542_+(Itgb1);circRNA_4863|Chr4:151118221_151123637_-(Cacna1c);circRNA_6952|Chr9:82557123_82558587_+(Des);circRNA_6953|Chr9:82558343_82558587_+(Des);	rno05410
rno05412	Arrhythmogenic right ventricular cardiomyopathy (ARVC)	Human Diseases	Cardiovascular disease	5	151	59	2681	0.236372	0.997288	1.50466	circRNA_1547|Chr12:13717791_13718009_-(Actb);circRNA_3283|Chr19:61714402_61714542_+(Itgb1);circRNA_4863|Chr4:151118221_151123637_-(Cacna1c);circRNA_6952|Chr9:82557123_82558587_+(Des);circRNA_6953|Chr9:82558343_82558587_+(Des);	rno05412
rno05414	Dilated cardiomyopathy (DCM)	Human Diseases	Cardiovascular disease	6	151	69	2681	0.18999	0.997288	1.54391	circRNA_1547|Chr12:13717791_13718009_-(Actb);circRNA_1738|Chr13:52667988_52673721_+(Tnnt2);circRNA_3283|Chr19:61714402_61714542_+(Itgb1);circRNA_4863|Chr4:151118221_151123637_-(Cacna1c);circRNA_6952|Chr9:82557123_82558587_+(Des);circRNA_6953|Chr9:82558343_82558587_+(Des);	rno05414
rno05416	Viral myocarditis	Human Diseases	Cardiovascular disease	3	151	22	2681	0.123292	0.990538	2.42113	circRNA_1547|Chr12:13717791_13718009_-(Actb);circRNA_3876|Chr20:4095939_4118506_+(RT1-Db1);circRNA_5413|Chr5:156506448_156517254_+(Eif4g3);	rno05416
rno05418	Fluid shear stress and atherosclerosis	Human Diseases	Cardiovascular disease	6	151	81	2681	0.304087	0.997288	1.31518	circRNA_0038|Chr1:15545013_15551204_+(Map3k5);circRNA_0233|Chr1:128239552_128243030_-(Mef2a);circRNA_1547|Chr12:13717791_13718009_-(Actb);circRNA_3738|Chr2:210723584_210806489_-(Gstm7);circRNA_3744|Chr2:210806416_210806638_+(Gstm1);circRNA_3745|Chr2:210808354_210822401_-(Gstm1);	rno05418

## Sheet: up-regulated (SSCI–2 vs. sham)
id	Term	Classification_level1	Classification_level2	ListHits	ListTotal	PopHits	PopTotal	p-value	q-value	Enrichment_score	Gene	hyperlink_only_excel
rno00010	Glycolysis / Gluconeogenesis	Metabolism	Carbohydrate metabolism	1	147	5	2681	0.245855	0.943725	3.64762	circRNA_0722|Chr1:261165387_261165588_-(Pgam1);	rno00010
rno00140	Steroid hormone biosynthesis	Metabolism	Lipid metabolism	1	147	6	2681	0.287282	0.943725	3.03968	circRNA_6157|Chr7:116072198_116158807_-(Cyp11b3);	rno00140
rno00190	Oxidative phosphorylation	Metabolism	Energy metabolism	1	147	21	2681	0.695406	0.943725	0.868481	circRNA_5011|Chr5:14282912_14314250_-(Atp6v1h);	rno00190
rno00230	Purine metabolism	Metabolism	Nucleotide metabolism	3	147	57	2681	0.613646	0.943725	0.9599	circRNA_0062|Chr1:21647066_21662702_+(Enpp3);circRNA_0984|Chr10:56342097_56352370_-(Polr2a);circRNA_6264|Chr8:439822_456940_+(Gucy1a2);	rno00230
rno00240	Pyrimidine metabolism	Metabolism	Nucleotide metabolism	4	147	19	2681	0.0176359	0.770853	3.8396	circRNA_0062|Chr1:21647066_21662702_+(Enpp3);circRNA_0984|Chr10:56342097_56352370_-(Polr2a);circRNA_1840|Chr13:85397122_85399509_-(Uck2);circRNA_1841|Chr13:85401003_85401929_+(Uck2);	rno00240
rno00280	Valine, leucine and isoleucine degradation	Metabolism	Amino acid metabolism	1	147	35	2681	0.862848	0.943725	0.521088	circRNA_6841|Chr9:53492939_53508890_-(Hibch);	rno00280
rno00310	Lysine degradation	Metabolism	Amino acid metabolism	3	147	83	2681	0.844128	0.943725	0.659208	circRNA_2644|Chr17:9912158_9914708_-(Nsd1);circRNA_2645|Chr17:9912158_9920790_-(Nsd1);circRNA_6243|Chr7:140533891_140536242_-(Kmt2d);	rno00310
rno00410	beta-Alanine metabolism	Metabolism	Metabolism of other amino acids	1	147	11	2681	0.462857	0.943725	1.65801	circRNA_6841|Chr9:53492939_53508890_-(Hibch);	rno00410
rno00480	Glutathione metabolism	Metabolism	Metabolism of other amino acids	2	147	15	2681	0.197107	0.943725	2.43175	circRNA_3744|Chr2:210806416_210806638_+(Gstm1);circRNA_3745|Chr2:210808354_210822401_-(Gstm1);	rno00480
rno00500	Starch and sucrose metabolism	Metabolism	Carbohydrate metabolism	1	147	6	2681	0.287282	0.943725	3.03968	circRNA_0062|Chr1:21647066_21662702_+(Enpp3);	rno00500
rno00514	Other types of O-glycan biosynthesis	Metabolism	Glycan biosynthesis and metabolism	2	147	9	2681	0.0834341	0.943725	4.05291	circRNA_6169|Chr7:119987740_119990307_-(Mfng);circRNA_6170|Chr7:119987740_119990759_-(Mfng);	rno00514
rno00515	Mannose type O-glycan biosyntheis	Metabolism	Glycan biosynthesis and metabolism	1	147	14	2681	0.546811	0.943725	1.30272	circRNA_5050|Chr5:40131915_40156826_-(Fut9);	rno00515
rno00520	Amino sugar and nucleotide sugar metabolism	Metabolism	Carbohydrate metabolism	1	147	22	2681	0.712238	0.943725	0.829004	circRNA_6576|Chr8:94718121_94730732_+(Cyb5r4);	rno00520
rno00562	Inositol phosphate metabolism	Metabolism	Carbohydrate metabolism	4	147	77	2681	0.618216	0.943725	0.947434	circRNA_0388|Chr1:185233419_185234547_+(Pik3c2a);circRNA_0647|Chr1:251455609_251485480_+(Pten);circRNA_2831|Chr18:301858_306376_-(Mtmr1);circRNA_6605|Chr8:107334721_107366975_-(Pik3cb);	rno00562
rno00564	Glycerophospholipid metabolism	Metabolism	Lipid metabolism	3	147	42	2681	0.407488	0.943725	1.30272	circRNA_1955|Chr14:9421418_9440942_-(Cds1);circRNA_3736|Chr2:209143856_209152642_-(Cept1);circRNA_3737|Chr2:209146114_209152642_-(Cept1);	rno00564
rno00565	Ether lipid metabolism	Metabolism	Lipid metabolism	2	147	28	2681	0.459747	0.943725	1.30272	circRNA_3736|Chr2:209143856_209152642_-(Cept1);circRNA_3737|Chr2:209146114_209152642_-(Cept1);	rno00565
rno00590	Arachidonic acid metabolism	Metabolism	Lipid metabolism	1	147	10	2681	0.431574	0.943725	1.82381	circRNA_5223|Chr5:115146569_115199307_-(Cyp2j3);	rno00590
rno00591	Linoleic acid metabolism	Metabolism	Lipid metabolism	1	147	6	2681	0.287282	0.943725	3.03968	circRNA_5223|Chr5:115146569_115199307_-(Cyp2j3);	rno00591
rno00600	Sphingolipid metabolism	Metabolism	Lipid metabolism	2	147	26	2681	0.421701	0.943725	1.40293	circRNA_2887|Chr18:15480332_15494701_+(B4galt6);circRNA_5132|Chr5:76403738_76415437_+(Ugcg);	rno00600
rno00601	Glycosphingolipid biosynthesis - lacto and neolacto series	Metabolism	Glycan biosynthesis and metabolism	1	147	5	2681	0.245855	0.943725	3.64762	circRNA_5050|Chr5:40131915_40156826_-(Fut9);	rno00601
rno00604	Glycosphingolipid biosynthesis - ganglio series	Metabolism	Glycan biosynthesis and metabolism	3	147	9	2681	0.0106254	0.770853	6.07937	circRNA_3585|Chr2:154520979_154532393_-(Slc33a1);circRNA_3857|Chr2:259561613_259564303_-(St6galnac3);circRNA_4762|Chr4:99970321_99980034_+(St3gal5);	rno00604
rno00640	Propanoate metabolism	Metabolism	Carbohydrate metabolism	1	147	25	2681	0.75739	0.943725	0.729524	circRNA_6841|Chr9:53492939_53508890_-(Hibch);	rno00640
rno00760	Nicotinate and nicotinamide metabolism	Metabolism	Metabolism of cofactors and vitamins	1	147	6	2681	0.287282	0.943725	3.03968	circRNA_0062|Chr1:21647066_21662702_+(Enpp3);	rno00760
rno00770	Pantothenate and CoA biosynthesis	Metabolism	Metabolism of cofactors and vitamins	1	147	12	2681	0.492431	0.943725	1.51984	circRNA_0062|Chr1:21647066_21662702_+(Enpp3);	rno00770
rno00980	Metabolism of xenobiotics by cytochrome P450	Metabolism	Xenobiotics biodegradation and metabolism	2	147	14	2681	0.176854	0.943725	2.60544	circRNA_3744|Chr2:210806416_210806638_+(Gstm1);circRNA_3745|Chr2:210808354_210822401_-(Gstm1);	rno00980
rno00982	Drug metabolism - cytochrome P450	Metabolism	Xenobiotics biodegradation and metabolism	2	147	15	2681	0.197107	0.943725	2.43175	circRNA_3744|Chr2:210806416_210806638_+(Gstm1);circRNA_3745|Chr2:210808354_210822401_-(Gstm1);	rno00982
rno00983	Drug metabolism - other enzymes	Metabolism	Xenobiotics biodegradation and metabolism	4	147	21	2681	0.0250131	0.770853	3.47392	circRNA_1840|Chr13:85397122_85399509_-(Uck2);circRNA_1841|Chr13:85401003_85401929_+(Uck2);circRNA_3744|Chr2:210806416_210806638_+(Gstm1);circRNA_3745|Chr2:210808354_210822401_-(Gstm1);	rno00983
rno01521	EGFR tyrosine kinase inhibitor resistance	Human Diseases	Drug resistance: antineoplastic	4	147	65	2681	0.481873	0.943725	1.12234	circRNA_0647|Chr1:251455609_251485480_+(Pten);circRNA_1053|Chr10:66732462_66738274_+(Nf1);circRNA_1058|Chr10:66812207_66822005_+(Nf1);circRNA_6605|Chr8:107334721_107366975_-(Pik3cb);	rno01521
rno01522	Endocrine resistance	Human Diseases	Drug resistance: antineoplastic	5	147	66	2681	0.293932	0.943725	1.38167	circRNA_0972|Chr10:48749746_48753281_-(Ncor1);circRNA_4377|Chr3:130093308_130099815_-(Jag1);circRNA_6032|Chr7:60733754_60737965_-(Mdm2);circRNA_6153|Chr7:114523676_114540933_-(Ptk2);circRNA_6605|Chr8:107334721_107366975_-(Pik3cb);	rno01522
rno01523	Antifolate resistance	Human Diseases	Drug resistance: antineoplastic	3	147	15	2681	0.045212	0.825119	3.64762	circRNA_0786|Chr10:574395_593608_-(Abcc1);circRNA_2406|Chr15:103706020_103717662_-(Abcc4);circRNA_3912|Chr20:12339749_12342262_-(Slc19a1);	rno01523
rno01524	Platinum drug resistance	Human Diseases	Drug resistance: antineoplastic	6	147	45	2681	0.0340124	0.770853	2.43175	circRNA_0035|Chr1:15488392_15526167_+(Map3k5);circRNA_0038|Chr1:15545013_15551204_+(Map3k5);circRNA_3744|Chr2:210806416_210806638_+(Gstm1);circRNA_3745|Chr2:210808354_210822401_-(Gstm1);circRNA_6032|Chr7:60733754_60737965_-(Mdm2);circRNA_6605|Chr8:107334721_107366975_-(Pik3cb);	rno01524
rno02010	ABC transporters	Environmental Information Processing	Membrane transport	3	147	25	2681	0.154331	0.943725	2.18857	circRNA_0786|Chr10:574395_593608_-(Abcc1);circRNA_2406|Chr15:103706020_103717662_-(Abcc4);circRNA_3776|Chr2:225359048_225371154_-(Abcd3);	rno02010
rno03008	Ribosome biogenesis in eukaryotes	Genetic Information Processing	Translation	1	147	26	2681	0.770818	0.943725	0.701465	circRNA_5775|Chr6:108797786_108802113_+(Fcf1);	rno03008
rno03013	RNA transport	Genetic Information Processing	Translation	7	147	58	2681	0.0369927	0.770853	2.20115	circRNA_0431|Chr1:197981834_197982318_-(Eif3c);circRNA_0433|Chr1:197981834_197983858_-(Eif3c);circRNA_1161|Chr10:85109546_85112742_-(Kpnb1);circRNA_2766|Chr17:76245627_76265943_-(Upf2);circRNA_2768|Chr17:76260636_76265943_-(Upf2);circRNA_4062|Chr3:8887351_8892631_+(Nup188);circRNA_5413|Chr5:156506448_156517254_+(Eif4g3);	rno03013
rno03015	mRNA surveillance pathway	Genetic Information Processing	Translation	4	147	47	2681	0.255374	0.943725	1.55218	circRNA_2766|Chr17:76245627_76265943_-(Upf2);circRNA_2768|Chr17:76260636_76265943_-(Upf2);circRNA_5840|Chr6:129621583_129636485_+(Papola);circRNA_5842|Chr6:129621583_129660096_+(Papola);	rno03015
rno03018	RNA degradation	Genetic Information Processing	Folding, sorting and degradation	2	147	53	2681	0.797796	0.943725	0.68823	circRNA_0813|Chr10:1413338_1419399_-(Parn);circRNA_4735|Chr4:87017858_87018778_-(Lsm5);	rno03018
rno03022	Basal transcription factors	Genetic Information Processing	Transcription	1	147	21	2681	0.695406	0.943725	0.868481	circRNA_2557|Chr16:62132750_62160831_-(Gtf2e2);	rno03022
rno03040	Spliceosome	Genetic Information Processing	Transcription	2	147	30	2681	0.496314	0.943725	1.21587	circRNA_3885|Chr20:4896892_4921063_-(Hspa1l);circRNA_4735|Chr4:87017858_87018778_-(Lsm5);	rno03040
rno03320	PPAR signaling pathway	Organismal Systems	Endocrine system	2	147	54	2681	0.806316	0.943725	0.675485	circRNA_0689|Chr1:259396273_259421082_-(Sorbs1);circRNA_0701|Chr1:259434763_259459540_-(Sorbs1);	rno03320
rno03440	Homologous recombination	Genetic Information Processing	Replication and repair	2	147	21	2681	0.321387	0.943725	1.73696	circRNA_0923|Chr10:39004096_39019660_-(Rad50);circRNA_5570|Chr6:26011662_26047820_-(Bre);	rno03440
rno03450	Non-homologous end-joining	Genetic Information Processing	Replication and repair	1	147	9	2681	0.398481	0.943725	2.02646	circRNA_0923|Chr10:39004096_39019660_-(Rad50);	rno03450
rno04010	MAPK signaling pathway	Environmental Information Processing	Signal transduction	9	147	213	2681	0.841135	0.943725	0.770624	circRNA_0035|Chr1:15488392_15526167_+(Map3k5);circRNA_0038|Chr1:15545013_15551204_+(Map3k5);circRNA_1053|Chr10:66732462_66738274_+(Nf1);circRNA_1058|Chr10:66812207_66822005_+(Nf1);circRNA_3203|Chr19:38057557_38062193_+(Nfatc3);circRNA_3885|Chr20:4896892_4921063_-(Hspa1l);circRNA_4041|Chr3:2762162_2764477_-(Traf2);circRNA_4557|Chr4:15859003_15915406_-(Cacna2d1);circRNA_4863|Chr4:151118221_15112363…	rno04010
rno04012	ErbB signaling pathway	Environmental Information Processing	Signal transduction	2	147	71	2681	0.909553	0.958921	0.513749	circRNA_6153|Chr7:114523676_114540933_-(Ptk2);circRNA_6605|Chr8:107334721_107366975_-(Pik3cb);	rno04012
rno04014	Ras signaling pathway	Environmental Information Processing	Signal transduction	5	147	131	2681	0.857068	0.943725	0.696111	circRNA_1053|Chr10:66732462_66738274_+(Nf1);circRNA_1058|Chr10:66812207_66822005_+(Nf1);circRNA_1305|Chr11:30029802_30036752_-(Tiam1);circRNA_1650|Chr12:40388299_40397763_-(Brap);circRNA_6605|Chr8:107334721_107366975_-(Pik3cb);	rno04014
rno04015	Rap1 signaling pathway	Environmental Information Processing	Signal transduction	4	147	139	2681	0.954103	0.976395	0.524837	circRNA_0589|Chr1:233561451_233581182_+(Gnaq);circRNA_0591|Chr1:233578229_233581182_+(Gnaq);circRNA_1305|Chr11:30029802_30036752_-(Tiam1);circRNA_6605|Chr8:107334721_107366975_-(Pik3cb);	rno04015
rno04020	Calcium signaling pathway	Environmental Information Processing	Signal transduction	4	147	116	2681	0.890403	0.955873	0.6289	circRNA_0589|Chr1:233561451_233581182_+(Gnaq);circRNA_0591|Chr1:233578229_233581182_+(Gnaq);circRNA_4863|Chr4:151118221_151123637_-(Cacna1c);circRNA_4949|Chr4:180721313_180722357_-(Itpr2);	rno04020
rno04022	cGMP - PKG signaling pathway	Environmental Information Processing	Signal transduction	6	147	156	2681	0.869291	0.943725	0.701465	circRNA_0589|Chr1:233561451_233581182_+(Gnaq);circRNA_0591|Chr1:233578229_233581182_+(Gnaq);circRNA_3203|Chr19:38057557_38062193_+(Nfatc3);circRNA_4863|Chr4:151118221_151123637_-(Cacna1c);circRNA_4949|Chr4:180721313_180722357_-(Itpr2);circRNA_6264|Chr8:439822_456940_+(Gucy1a2);	rno04022
rno04024	cAMP signaling pathway	Environmental Information Processing	Signal transduction	8	147	130	2681	0.421102	0.943725	1.12234	circRNA_0848|Chr10:11626519_11627228_+(Crebbp);circRNA_1305|Chr11:30029802_30036752_-(Tiam1);circRNA_2406|Chr15:103706020_103717662_-(Abcc4);circRNA_2606|Chr17:1059417_1065593_-(Ptch1);circRNA_3750|Chr2:212471565_212487554_+(Vav3);circRNA_4863|Chr4:151118221_151123637_-(Cacna1c);circRNA_6183|Chr7:122834692_122835329_+(Ep300);circRNA_6605|Chr8:107334721_107366975_-(Pik3cb);	rno04024
rno04060	Cytokine-cytokine receptor interaction	Environmental Information Processing	Signaling molecules and interaction	2	147	32	2681	0.531286	0.943725	1.13988	circRNA_6754|Chr9:20568247_20599410_-(Tnfrsf21);circRNA_6755|Chr9:20596863_20599410_-(Tnfrsf21);	rno04060
rno04062	Chemokine signaling pathway	Organismal Systems	Immune system	4	147	98	2681	0.796734	0.943725	0.744412	circRNA_1305|Chr11:30029802_30036752_-(Tiam1);circRNA_3750|Chr2:212471565_212487554_+(Vav3);circRNA_6153|Chr7:114523676_114540933_-(Ptk2);circRNA_6605|Chr8:107334721_107366975_-(Pik3cb);	rno04062
rno04064	NF-kappa B signaling pathway	Environmental Information Processing	Signal transduction	2	147	30	2681	0.496314	0.943725	1.21587	circRNA_4041|Chr3:2762162_2764477_-(Traf2);circRNA_5882|Chr6:135672583_135696475_+(Traf3);	rno04064
rno04066	HIF-1 signaling pathway	Environmental Information Processing	Signal transduction	3	147	51	2681	0.53679	0.943725	1.07283	circRNA_0848|Chr10:11626519_11627228_+(Crebbp);circRNA_6183|Chr7:122834692_122835329_+(Ep300);circRNA_6605|Chr8:107334721_107366975_-(Pik3cb);	rno04066
rno04068	FoxO signaling pathway	Environmental Information Processing	Signal transduction	6	147	87	2681	0.341737	0.943725	1.2578	circRNA_0647|Chr1:251455609_251485480_+(Pten);circRNA_0848|Chr10:11626519_11627228_+(Crebbp);circRNA_3057|Chr18:72593000_72595275_+(Smad2);circRNA_6032|Chr7:60733754_60737965_-(Mdm2);circRNA_6183|Chr7:122834692_122835329_+(Ep300);circRNA_6605|Chr8:107334721_107366975_-(Pik3cb);	rno04068
rno04070	Phosphatidylinositol signaling system	Environmental Information Processing	Signal transduction	6	147	102	2681	0.491556	0.943725	1.07283	circRNA_0388|Chr1:185233419_185234547_+(Pik3c2a);circRNA_0647|Chr1:251455609_251485480_+(Pten);circRNA_1955|Chr14:9421418_9440942_-(Cds1);circRNA_2831|Chr18:301858_306376_-(Mtmr1);circRNA_4949|Chr4:180721313_180722357_-(Itpr2);circRNA_6605|Chr8:107334721_107366975_-(Pik3cb);	rno04070
rno04071	Sphingolipid signaling pathway	Environmental Information Processing	Signal transduction	8	147	88	2681	0.106185	0.943725	1.65801	circRNA_0035|Chr1:15488392_15526167_+(Map3k5);circRNA_0038|Chr1:15545013_15551204_+(Map3k5);circRNA_0589|Chr1:233561451_233581182_+(Gnaq);circRNA_0591|Chr1:233578229_233581182_+(Gnaq);circRNA_0647|Chr1:251455609_251485480_+(Pten);circRNA_0786|Chr10:574395_593608_-(Abcc1);circRNA_4041|Chr3:2762162_2764477_-(Traf2);circRNA_6605|Chr8:107334721_107366975_-(Pik3cb);	rno04071
rno04072	Phospholipase D signaling pathway	Environmental Information Processing	Signal transduction	1	147	89	2681	0.993937	0.993937	0.204922	circRNA_6605|Chr8:107334721_107366975_-(Pik3cb);	rno04072
rno04110	Cell cycle	Cellular Processes	Cell growth and death	5	147	72	2681	0.360312	0.943725	1.26653	circRNA_0848|Chr10:11626519_11627228_+(Crebbp);circRNA_3057|Chr18:72593000_72595275_+(Smad2);circRNA_6032|Chr7:60733754_60737965_-(Mdm2);circRNA_6183|Chr7:122834692_122835329_+(Ep300);circRNA_6607|Chr8:108991414_109052504_+(Stag1);	rno04110
rno04114	Oocyte meiosis	Cellular Processes	Cell growth and death	2	147	70	2681	0.90528	0.958921	0.521088	circRNA_0881|Chr10:17619518_17632113_+(Fbxw11);circRNA_4949|Chr4:180721313_180722357_-(Itpr2);	rno04114
rno04115	p53 signaling pathway	Cellular Processes	Cell growth and death	2	147	19	2681	0.279932	0.943725	1.9198	circRNA_0647|Chr1:251455609_251485480_+(Pten);circRNA_6032|Chr7:60733754_60737965_-(Mdm2);	rno04115
rno04120	Ubiquitin mediated proteolysis	Genetic Information Processing	Folding, sorting and degradation	7	147	120	2681	0.490463	0.943725	1.06389	circRNA_0881|Chr10:17619518_17632113_+(Fbxw11);circRNA_3005|Chr18:60572935_60578301_+(Nedd4l);circRNA_3061|Chr18:73479863_73490210_+(Pias2);circRNA_3621|Chr2:184309074_184309661_-(Fbxw7);circRNA_3958|Chr20:26818517_26823720_+(Herc4);circRNA_6032|Chr7:60733754_60737965_-(Mdm2);circRNA_6107|Chr7:76837537_76845975_-(Ubr5);	rno04120
rno04140	Autophagy - animal	Cellular Processes	Transport and catabolism	3	147	77	2681	0.804933	0.943725	0.710575	circRNA_0647|Chr1:251455609_251485480_+(Pten);circRNA_5769|Chr6:107055966_107056470_-(Zfyve1);circRNA_6605|Chr8:107334721_107366975_-(Pik3cb);	rno04140
rno04141	Protein processing in endoplasmic reticulum	Genetic Information Processing	Folding, sorting and degradation	5	147	86	2681	0.514009	0.943725	1.06035	circRNA_0035|Chr1:15488392_15526167_+(Map3k5);circRNA_0038|Chr1:15545013_15551204_+(Map3k5);circRNA_0904|Chr10:35816390_35818308_-(Canx);circRNA_3885|Chr20:4896892_4921063_-(Hspa1l);circRNA_4041|Chr3:2762162_2764477_-(Traf2);	rno04141
rno04142	Lysosome	Cellular Processes	Transport and catabolism	5	147	50	2681	0.135964	0.943725	1.82381	circRNA_3329|Chr2:24055343_24083767_+(Ap3b1);circRNA_3332|Chr2:24067948_24083767_+(Ap3b1);circRNA_3333|Chr2:24105473_24126036_+(Ap3b1);circRNA_5011|Chr5:14282912_14314250_-(Atp6v1h);circRNA_5380|Chr5:149062724_149065190_+(Laptm5);	rno04142
rno04144	Endocytosis	Cellular Processes	Transport and catabolism	12	147	193	2681	0.367311	0.943725	1.13397	circRNA_1026|Chr10:62623758_62664462_-(Git1);circRNA_3005|Chr18:60572935_60578301_+(Nedd4l);circRNA_3057|Chr18:72593000_72595275_+(Smad2);circRNA_3871|Chr20:3232306_3247033_+(RT1-T24-3);circRNA_3885|Chr20:4896892_4921063_-(Hspa1l);circRNA_4079|Chr3:12860437_12931658_-(Mvb12b);circRNA_6032|Chr7:60733754_60737965_-(Mdm2);circRNA_6241|Chr7:140415223_140417547_-(Arf3);circRNA_6242|Chr7:140415833_1404…	rno04144
rno04145	Phagosome	Cellular Processes	Transport and catabolism	4	147	61	2681	0.43237	0.943725	1.19594	circRNA_0904|Chr10:35816390_35818308_-(Canx);circRNA_3871|Chr20:3232306_3247033_+(RT1-T24-3);circRNA_4148|Chr3:46525736_46558304_-(Pla2r1);circRNA_5011|Chr5:14282912_14314250_-(Atp6v1h);	rno04145
rno04146	Peroxisome	Cellular Processes	Transport and catabolism	1	147	22	2681	0.712238	0.943725	0.829004	circRNA_3776|Chr2:225359048_225371154_-(Abcd3);	rno04146
rno04150	mTOR signaling pathway	Environmental Information Processing	Signal transduction	4	147	89	2681	0.730114	0.943725	0.81969	circRNA_0647|Chr1:251455609_251485480_+(Pten);circRNA_4085|Chr3:13510410_13602354_+(Mapkap1);circRNA_5011|Chr5:14282912_14314250_-(Atp6v1h);circRNA_6605|Chr8:107334721_107366975_-(Pik3cb);	rno04150
rno04151	PI3K-Akt signaling pathway	Environmental Information Processing	Signal transduction	7	147	161	2681	0.793076	0.943725	0.792961	circRNA_0647|Chr1:251455609_251485480_+(Pten);circRNA_2592|Chr16:83563772_83585327_+(Col4a1);circRNA_3914|Chr20:12666784_12667523_+(Col6a1);circRNA_3915|Chr20:12784683_12785573_+(Col6a2);circRNA_6032|Chr7:60733754_60737965_-(Mdm2);circRNA_6153|Chr7:114523676_114540933_-(Ptk2);circRNA_6605|Chr8:107334721_107366975_-(Pik3cb);	rno04151
rno04152	AMPK signaling pathway	Environmental Information Processing	Signal transduction	1	147	63	2681	0.972555	0.978564	0.289494	circRNA_6605|Chr8:107334721_107366975_-(Pik3cb);	rno04152
rno04210	Apoptosis	Cellular Processes	Cell growth and death	6	147	62	2681	0.121172	0.943725	1.76498	circRNA_0035|Chr1:15488392_15526167_+(Map3k5);circRNA_0038|Chr1:15545013_15551204_+(Map3k5);circRNA_1952|Chr14:7796209_7810203_-(Ptpn13);circRNA_4041|Chr3:2762162_2764477_-(Traf2);circRNA_4949|Chr4:180721313_180722357_-(Itpr2);circRNA_6605|Chr8:107334721_107366975_-(Pik3cb);	rno04210
rno04211	Longevity regulating pathway - mammal	Organismal Systems	Aging	1	147	64	2681	0.974096	0.978564	0.28497	circRNA_6605|Chr8:107334721_107366975_-(Pik3cb);	rno04211
rno04213	Longevity regulating pathway - multiple species	Organismal Systems	Aging	2	147	31	2681	0.514005	0.943725	1.17665	circRNA_3885|Chr20:4896892_4921063_-(Hspa1l);circRNA_6605|Chr8:107334721_107366975_-(Pik3cb);	rno04213
rno04216	Ferroptosis	Cellular Processes	Cell growth and death	3	147	10	2681	0.0145765	0.770853	5.47143	circRNA_3557|Chr2:139502624_139512448_-(Slc7a11);circRNA_3558|Chr2:139502624_139520450_-(Slc7a11);circRNA_3559|Chr2:139502624_139523749_-(Slc7a11);	rno04216
rno04217	Necroptosis	Cellular Processes	Cell growth and death	3	147	44	2681	0.43737	0.943725	1.24351	circRNA_4041|Chr3:2762162_2764477_-(Traf2);circRNA_5289|Chr5:129413066_129457884_+(Faf1);circRNA_5290|Chr5:129413066_129475869_+(Faf1);	rno04217
rno04218	Cellular senescence	Cellular Processes	Cell growth and death	11	147	111	2681	0.0381456	0.770853	1.80738	circRNA_0647|Chr1:251455609_251485480_+(Pten);circRNA_0881|Chr10:17619518_17632113_+(Fbxw11);circRNA_0923|Chr10:39004096_39019660_-(Rad50);circRNA_1959|Chr14:10786399_10794860_+(Lin54);circRNA_1960|Chr14:10792005_10794860_+(Lin54);circRNA_3057|Chr18:72593000_72595275_+(Smad2);circRNA_3203|Chr19:38057557_38062193_+(Nfatc3);circRNA_3871|Chr20:3232306_3247033_+(RT1-T24-3);circRNA_4949|Chr4:180721313…	rno04218
rno04260	Cardiac muscle contraction	Organismal Systems	Circulatory system	3	147	39	2681	0.361887	0.943725	1.40293	circRNA_1738|Chr13:52667988_52673721_+(Tnnt2);circRNA_4557|Chr4:15859003_15915406_-(Cacna2d1);circRNA_4863|Chr4:151118221_151123637_-(Cacna1c);	rno04260
rno04261	Adrenergic signaling in cardiomyocytes	Organismal Systems	Circulatory system	5	147	102	2681	0.668217	0.943725	0.894024	circRNA_0589|Chr1:233561451_233581182_+(Gnaq);circRNA_0591|Chr1:233578229_233581182_+(Gnaq);circRNA_1738|Chr13:52667988_52673721_+(Tnnt2);circRNA_4557|Chr4:15859003_15915406_-(Cacna2d1);circRNA_4863|Chr4:151118221_151123637_-(Cacna1c);	rno04261
rno04270	Vascular smooth muscle contraction	Organismal Systems	Circulatory system	6	147	132	2681	0.74278	0.943725	0.829004	circRNA_0589|Chr1:233561451_233581182_+(Gnaq);circRNA_0591|Chr1:233578229_233581182_+(Gnaq);circRNA_0805|Chr10:840321_841807_-(Myh11);circRNA_4863|Chr4:151118221_151123637_-(Cacna1c);circRNA_4949|Chr4:180721313_180722357_-(Itpr2);circRNA_6264|Chr8:439822_456940_+(Gucy1a2);	rno04270
rno04310	Wnt signaling pathway	Environmental Information Processing	Signal transduction	4	147	88	2681	0.721805	0.943725	0.829004	circRNA_0848|Chr10:11626519_11627228_+(Crebbp);circRNA_0881|Chr10:17619518_17632113_+(Fbxw11);circRNA_3203|Chr19:38057557_38062193_+(Nfatc3);circRNA_6183|Chr7:122834692_122835329_+(Ep300);	rno04310
rno04330	Notch signaling pathway	Environmental Information Processing	Signal transduction	5	147	19	2681	0.00287959	0.63063	4.7995	circRNA_0848|Chr10:11626519_11627228_+(Crebbp);circRNA_4377|Chr3:130093308_130099815_-(Jag1);circRNA_6169|Chr7:119987740_119990307_-(Mfng);circRNA_6170|Chr7:119987740_119990759_-(Mfng);circRNA_6183|Chr7:122834692_122835329_+(Ep300);	rno04330
rno04340	Hedgehog signaling pathway	Environmental Information Processing	Signal transduction	2	147	25	2681	0.402175	0.943725	1.45905	circRNA_0881|Chr10:17619518_17632113_+(Fbxw11);circRNA_2606|Chr17:1059417_1065593_-(Ptch1);	rno04340
rno04350	TGF-beta signaling pathway	Environmental Information Processing	Signal transduction	3	147	62	2681	0.67088	0.943725	0.882488	circRNA_0848|Chr10:11626519_11627228_+(Crebbp);circRNA_3057|Chr18:72593000_72595275_+(Smad2);circRNA_6183|Chr7:122834692_122835329_+(Ep300);	rno04350
rno04360	Axon guidance	Organismal Systems	Development and regeneration	6	147	115	2681	0.611948	0.943725	0.951553	circRNA_1878|Chr13:100347405_100353039_-(Enah);circRNA_2606|Chr17:1059417_1065593_-(Ptch1);circRNA_3203|Chr19:38057557_38062193_+(Nfatc3);circRNA_6046|Chr7:64125692_64131186_-(Srgap1);circRNA_6153|Chr7:114523676_114540933_-(Ptk2);circRNA_6605|Chr8:107334721_107366975_-(Pik3cb);	rno04360
rno04370	VEGF signaling pathway	Environmental Information Processing	Signal transduction	2	147	60	2681	0.851061	0.943725	0.607937	circRNA_6153|Chr7:114523676_114540933_-(Ptk2);circRNA_6605|Chr8:107334721_107366975_-(Pik3cb);	rno04370
rno04371	Apelin signaling pathway	Environmental Information Processing	Signal transduction	5	147	111	2681	0.739632	0.943725	0.821536	circRNA_0589|Chr1:233561451_233581182_+(Gnaq);circRNA_0591|Chr1:233578229_233581182_+(Gnaq);circRNA_3057|Chr18:72593000_72595275_+(Smad2);circRNA_4377|Chr3:130093308_130099815_-(Jag1);circRNA_4949|Chr4:180721313_180722357_-(Itpr2);	rno04371
rno04380	Osteoclast differentiation	Organismal Systems	Development and regeneration	4	147	64	2681	0.469639	0.943725	1.13988	circRNA_0125|Chr1:63842808_63920657_+(Lilrb3l);circRNA_4041|Chr3:2762162_2764477_-(Traf2);circRNA_4346|Chr3:122130941_122141403_+(Sirpa);circRNA_6605|Chr8:107334721_107366975_-(Pik3cb);	rno04380
rno04390	Hippo signaling pathway	Environmental Information Processing	Signal transduction	3	147	84	2681	0.849958	0.943725	0.651361	circRNA_0375|Chr1:177651557_177654228_+(Tead1);circRNA_0881|Chr10:17619518_17632113_+(Fbxw11);circRNA_3057|Chr18:72593000_72595275_+(Smad2);	rno04390
rno04392	Hippo signaling pathway - multiple species	Environmental Information Processing	Signal transduction	1	147	26	2681	0.770818	0.943725	0.701465	circRNA_0375|Chr1:177651557_177654228_+(Tead1);	rno04392
rno04510	Focal adhesion	Cellular Processes	Cellular community - eukaryotes	8	147	192	2681	0.840899	0.943725	0.759921	circRNA_0369|Chr1:177360220_177377649_+(Parva);circRNA_0647|Chr1:251455609_251485480_+(Pten);circRNA_2592|Chr16:83563772_83585327_+(Col4a1);circRNA_3750|Chr2:212471565_212487554_+(Vav3);circRNA_3914|Chr20:12666784_12667523_+(Col6a1);circRNA_3915|Chr20:12784683_12785573_+(Col6a2);circRNA_6153|Chr7:114523676_114540933_-(Ptk2);circRNA_6605|Chr8:107334721_107366975_-(Pik3cb);	rno04510
rno04512	ECM-receptor interaction	Environmental Information Processing	Signaling molecules and interaction	4	147	70	2681	0.541254	0.943725	1.04218	circRNA_1375|Chr11:53545477_53563559_-(Cd47);circRNA_2592|Chr16:83563772_83585327_+(Col4a1);circRNA_3914|Chr20:12666784_12667523_+(Col6a1);circRNA_3915|Chr20:12784683_12785573_+(Col6a2);	rno04512
rno04514	Cell adhesion molecules (CAMs)	Environmental Information Processing	Signaling molecules and interaction	2	147	51	2681	0.779766	0.943725	0.715219	circRNA_1837|Chr13:83813058_83819669_-(Mpzl1);circRNA_3871|Chr20:3232306_3247033_+(RT1-T24-3);	rno04514
rno04520	Adherens junction	Cellular Processes	Cellular community - eukaryotes	5	147	112	2681	0.746835	0.943725	0.814201	circRNA_0689|Chr1:259396273_259421082_-(Sorbs1);circRNA_0701|Chr1:259434763_259459540_-(Sorbs1);circRNA_0848|Chr10:11626519_11627228_+(Crebbp);circRNA_3057|Chr18:72593000_72595275_+(Smad2);circRNA_6183|Chr7:122834692_122835329_+(Ep300);	rno04520
rno04530	Tight junction	Cellular Processes	Cellular community - eukaryotes	5	147	118	2681	0.787007	0.943725	0.772801	circRNA_0035|Chr1:15488392_15526167_+(Map3k5);circRNA_0038|Chr1:15545013_15551204_+(Map3k5);circRNA_0805|Chr10:840321_841807_-(Myh11);circRNA_1305|Chr11:30029802_30036752_-(Tiam1);circRNA_3005|Chr18:60572935_60578301_+(Nedd4l);	rno04530
rno04540	Gap junction	Cellular Processes	Cellular community - eukaryotes	4	147	65	2681	0.481873	0.943725	1.12234	circRNA_0589|Chr1:233561451_233581182_+(Gnaq);circRNA_0591|Chr1:233578229_233581182_+(Gnaq);circRNA_4949|Chr4:180721313_180722357_-(Itpr2);circRNA_6264|Chr8:439822_456940_+(Gucy1a2);	rno04540
rno04550	Signaling pathways regulating pluripotency of stem cells	Cellular Processes	Cellular community - eukaryotes	5	147	60	2681	0.23019	0.943725	1.51984	circRNA_3057|Chr18:72593000_72595275_+(Smad2);circRNA_3223|Chr19:42856166_42920390_-(Zfhx3);circRNA_3224|Chr19:42911935_42920390_-(Zfhx3);circRNA_3225|Chr19:42917629_42920390_-(Zfhx3);circRNA_6605|Chr8:107334721_107366975_-(Pik3cb);	rno04550
rno04610	Complement and coagulation cascades	Organismal Systems	Immune system	2	147	12	2681	0.137554	0.943725	3.03968	circRNA_1755|Chr13:57029508_57030242_-(Cfh);circRNA_1756|Chr13:57044027_57047903_-(Cfh);	rno04610
rno04611	Platelet activation	Organismal Systems	Immune system	5	147	122	2681	0.810955	0.943725	0.747463	circRNA_0589|Chr1:233561451_233581182_+(Gnaq);circRNA_0591|Chr1:233578229_233581182_+(Gnaq);circRNA_4949|Chr4:180721313_180722357_-(Itpr2);circRNA_6264|Chr8:439822_456940_+(Gucy1a2);circRNA_6605|Chr8:107334721_107366975_-(Pik3cb);	rno04611
rno04612	Antigen processing and presentation	Organismal Systems	Immune system	3	147	23	2681	0.128413	0.943725	2.37888	circRNA_0904|Chr10:35816390_35818308_-(Canx);circRNA_3871|Chr20:3232306_3247033_+(RT1-T24-3);circRNA_3885|Chr20:4896892_4921063_-(Hspa1l);	rno04612
rno04620	Toll-like receptor signaling pathway	Organismal Systems	Immune system	2	147	33	2681	0.548147	0.943725	1.10534	circRNA_5882|Chr6:135672583_135696475_+(Traf3);circRNA_6605|Chr8:107334721_107366975_-(Pik3cb);	rno04620
rno04621	NOD-like receptor signaling pathway	Organismal Systems	Immune system	6	147	64	2681	0.135446	0.943725	1.70982	circRNA_3367|Chr2:30384653_30433774_-(Naip6);circRNA_3369|Chr2:30410157_30454166_-(Naip5);circRNA_4041|Chr3:2762162_2764477_-(Traf2);circRNA_4949|Chr4:180721313_180722357_-(Itpr2);circRNA_5042|Chr5:29851601_29865341_-(Ripk2);circRNA_5882|Chr6:135672583_135696475_+(Traf3);	rno04621
rno04622	RIG-I-like receptor signaling pathway	Organismal Systems	Immune system	2	147	23	2681	0.362249	0.943725	1.58592	circRNA_4041|Chr3:2762162_2764477_-(Traf2);circRNA_5882|Chr6:135672583_135696475_+(Traf3);	rno04622
rno04625	C-type lectin receptor signaling pathway	Organismal Systems	Immune system	4	147	69	2681	0.529641	0.943725	1.05728	circRNA_3203|Chr19:38057557_38062193_+(Nfatc3);circRNA_4949|Chr4:180721313_180722357_-(Itpr2);circRNA_6032|Chr7:60733754_60737965_-(Mdm2);circRNA_6605|Chr8:107334721_107366975_-(Pik3cb);	rno04625
rno04630	Jak-STAT signaling pathway	Environmental Information Processing	Signal transduction	4	147	52	2681	0.317989	0.943725	1.40293	circRNA_0848|Chr10:11626519_11627228_+(Crebbp);circRNA_3061|Chr18:73479863_73490210_+(Pias2);circRNA_6183|Chr7:122834692_122835329_+(Ep300);circRNA_6605|Chr8:107334721_107366975_-(Pik3cb);	rno04630
rno04650	Natural killer cell mediated cytotoxicity	Organismal Systems	Immune system	3	147	60	2681	0.648752	0.943725	0.911905	circRNA_3750|Chr2:212471565_212487554_+(Vav3);circRNA_3871|Chr20:3232306_3247033_+(RT1-T24-3);circRNA_6605|Chr8:107334721_107366975_-(Pik3cb);	rno04650
rno04657	IL-17 signaling pathway	Organismal Systems	Immune system	2	147	24	2681	0.382348	0.943725	1.51984	circRNA_4041|Chr3:2762162_2764477_-(Traf2);circRNA_5882|Chr6:135672583_135696475_+(Traf3);	rno04657
rno04658	Th1 and Th2 cell differentiation	Organismal Systems	Immune system	2	147	43	2681	0.693156	0.943725	0.848283	circRNA_3203|Chr19:38057557_38062193_+(Nfatc3);circRNA_4377|Chr3:130093308_130099815_-(Jag1);	rno04658
rno04659	Th17 cell differentiation	Organismal Systems	Immune system	2	147	61	2681	0.85754	0.943725	0.59797	circRNA_3057|Chr18:72593000_72595275_+(Smad2);circRNA_3203|Chr19:38057557_38062193_+(Nfatc3);	rno04659
rno04660	T cell receptor signaling pathway	Organismal Systems	Immune system	3	147	80	2681	0.82546	0.943725	0.683929	circRNA_3203|Chr19:38057557_38062193_+(Nfatc3);circRNA_3750|Chr2:212471565_212487554_+(Vav3);circRNA_6605|Chr8:107334721_107366975_-(Pik3cb);	rno04660
rno04662	B cell receptor signaling pathway	Organismal Systems	Immune system	3	147	58	2681	0.625601	0.943725	0.94335	circRNA_3203|Chr19:38057557_38062193_+(Nfatc3);circRNA_3750|Chr2:212471565_212487554_+(Vav3);circRNA_6605|Chr8:107334721_107366975_-(Pik3cb);	rno04662
rno04664	Fc epsilon RI signaling pathway	Organismal Systems	Immune system	2	147	40	2681	0.654139	0.943725	0.911905	circRNA_3750|Chr2:212471565_212487554_+(Vav3);circRNA_6605|Chr8:107334721_107366975_-(Pik3cb);	rno04664
rno04666	Fc gamma R-mediated phagocytosis	Organismal Systems	Immune system	2	147	51	2681	0.779766	0.943725	0.715219	circRNA_3750|Chr2:212471565_212487554_+(Vav3);circRNA_6605|Chr8:107334721_107366975_-(Pik3cb);	rno04666
rno04668	TNF signaling pathway	Environmental Information Processing	Signal transduction	6	147	65	2681	0.14287	0.943725	1.68352	circRNA_0035|Chr1:15488392_15526167_+(Map3k5);circRNA_0038|Chr1:15545013_15551204_+(Map3k5);circRNA_4041|Chr3:2762162_2764477_-(Traf2);circRNA_4377|Chr3:130093308_130099815_-(Jag1);circRNA_5882|Chr6:135672583_135696475_+(Traf3);circRNA_6605|Chr8:107334721_107366975_-(Pik3cb);	rno04668
rno04670	Leukocyte transendothelial migration	Organismal Systems	Immune system	3	147	63	2681	0.681559	0.943725	0.868481	circRNA_3750|Chr2:212471565_212487554_+(Vav3);circRNA_6153|Chr7:114523676_114540933_-(Ptk2);circRNA_6605|Chr8:107334721_107366975_-(Pik3cb);	rno04670
rno04710	Circadian rhythm	Organismal Systems	Environmental adaptation	1	147	9	2681	0.398481	0.943725	2.02646	circRNA_0881|Chr10:17619518_17632113_+(Fbxw11);	rno04710
rno04713	Circadian entrainment	Organismal Systems	Environmental adaptation	4	147	77	2681	0.618216	0.943725	0.947434	circRNA_0589|Chr1:233561451_233581182_+(Gnaq);circRNA_0591|Chr1:233578229_233581182_+(Gnaq);circRNA_4863|Chr4:151118221_151123637_-(Cacna1c);circRNA_6264|Chr8:439822_456940_+(Gucy1a2);	rno04713
rno04714	Thermogenesis	Organismal Systems	Environmental adaptation	2	147	74	2681	0.92132	0.958921	0.492921	circRNA_0035|Chr1:15488392_15526167_+(Map3k5);circRNA_0038|Chr1:15545013_15551204_+(Map3k5);	rno04714
rno04720	Long-term potentiation	Organismal Systems	Nervous system	6	147	77	2681	0.244698	0.943725	1.42115	circRNA_0589|Chr1:233561451_233581182_+(Gnaq);circRNA_0591|Chr1:233578229_233581182_+(Gnaq);circRNA_0848|Chr10:11626519_11627228_+(Crebbp);circRNA_4863|Chr4:151118221_151123637_-(Cacna1c);circRNA_4949|Chr4:180721313_180722357_-(Itpr2);circRNA_6183|Chr7:122834692_122835329_+(Ep300);	rno04720
rno04721	Synaptic vesicle cycle	Organismal Systems	Nervous system	1	147	27	2681	0.783507	0.943725	0.675485	circRNA_5011|Chr5:14282912_14314250_-(Atp6v1h);	rno04721
rno04722	Neurotrophin signaling pathway	Organismal Systems	Nervous system	6	147	90	2681	0.371824	0.943725	1.21587	circRNA_0035|Chr1:15488392_15526167_+(Map3k5);circRNA_0038|Chr1:15545013_15551204_+(Map3k5);circRNA_1266|Chr10:109754888_109755050_+(Arhgdia);circRNA_1267|Chr10:109754906_109755050_+(Arhgdia);circRNA_5042|Chr5:29851601_29865341_-(Ripk2);circRNA_6605|Chr8:107334721_107366975_-(Pik3cb);	rno04722
rno04723	Retrograde endocannabinoid signaling	Organismal Systems	Nervous system	4	147	54	2681	0.343455	0.943725	1.35097	circRNA_0589|Chr1:233561451_233581182_+(Gnaq);circRNA_0591|Chr1:233578229_233581182_+(Gnaq);circRNA_4863|Chr4:151118221_151123637_-(Cacna1c);circRNA_4949|Chr4:180721313_180722357_-(Itpr2);	rno04723
rno04724	Glutamatergic synapse	Organismal Systems	Nervous system	5	147	77	2681	0.416097	0.943725	1.18429	circRNA_0589|Chr1:233561451_233581182_+(Gnaq);circRNA_0591|Chr1:233578229_233581182_+(Gnaq);circRNA_4863|Chr4:151118221_151123637_-(Cacna1c);circRNA_4949|Chr4:180721313_180722357_-(Itpr2);circRNA_6219|Chr7:130522030_130524289_+(Shank3);	rno04724
rno04725	Cholinergic synapse	Organismal Systems	Nervous system	5	147	61	2681	0.240534	0.943725	1.49493	circRNA_0589|Chr1:233561451_233581182_+(Gnaq);circRNA_0591|Chr1:233578229_233581182_+(Gnaq);circRNA_4863|Chr4:151118221_151123637_-(Cacna1c);circRNA_4949|Chr4:180721313_180722357_-(Itpr2);circRNA_6605|Chr8:107334721_107366975_-(Pik3cb);	rno04725
rno04726	Serotonergic synapse	Organismal Systems	Nervous system	5	147	59	2681	0.219982	0.943725	1.5456	circRNA_0589|Chr1:233561451_233581182_+(Gnaq);circRNA_0591|Chr1:233578229_233581182_+(Gnaq);circRNA_4863|Chr4:151118221_151123637_-(Cacna1c);circRNA_4949|Chr4:180721313_180722357_-(Itpr2);circRNA_5223|Chr5:115146569_115199307_-(Cyp2j3);	rno04726
rno04727	GABAergic synapse	Organismal Systems	Nervous system	1	147	35	2681	0.862848	0.943725	0.521088	circRNA_4863|Chr4:151118221_151123637_-(Cacna1c);	rno04727
rno04728	Dopaminergic synapse	Organismal Systems	Nervous system	4	147	85	2681	0.695764	0.943725	0.858263	circRNA_0589|Chr1:233561451_233581182_+(Gnaq);circRNA_0591|Chr1:233578229_233581182_+(Gnaq);circRNA_4863|Chr4:151118221_151123637_-(Cacna1c);circRNA_4949|Chr4:180721313_180722357_-(Itpr2);	rno04728
rno04730	Long-term depression	Organismal Systems	Nervous system	4	147	48	2681	0.267714	0.943725	1.51984	circRNA_0589|Chr1:233561451_233581182_+(Gnaq);circRNA_0591|Chr1:233578229_233581182_+(Gnaq);circRNA_4949|Chr4:180721313_180722357_-(Itpr2);circRNA_6264|Chr8:439822_456940_+(Gucy1a2);	rno04730
rno04742	Taste transduction	Organismal Systems	Sensory system	1	147	8	2681	0.363476	0.943725	2.27976	circRNA_4863|Chr4:151118221_151123637_-(Cacna1c);	rno04742
rno04750	Inflammatory mediator regulation of TRP channels	Organismal Systems	Sensory system	5	147	52	2681	0.153227	0.943725	1.75366	circRNA_0589|Chr1:233561451_233581182_+(Gnaq);circRNA_0591|Chr1:233578229_233581182_+(Gnaq);circRNA_4949|Chr4:180721313_180722357_-(Itpr2);circRNA_5223|Chr5:115146569_115199307_-(Cyp2j3);circRNA_6605|Chr8:107334721_107366975_-(Pik3cb);	rno04750
rno04810	Regulation of actin cytoskeleton	Cellular Processes	Cell motility	8	147	174	2681	0.751569	0.943725	0.838533	circRNA_1026|Chr10:62623758_62664462_-(Git1);circRNA_1305|Chr11:30029802_30036752_-(Tiam1);circRNA_1878|Chr13:100347405_100353039_-(Enah);circRNA_2378|Chr15:70098761_70139170_-(Diaph3);circRNA_2379|Chr15:70121769_70139170_-(Diaph3);circRNA_3750|Chr2:212471565_212487554_+(Vav3);circRNA_6153|Chr7:114523676_114540933_-(Ptk2);circRNA_6605|Chr8:107334721_107366975_-(Pik3cb);	rno04810
rno04910	Insulin signaling pathway	Organismal Systems	Endocrine system	3	147	100	2681	0.920519	0.958921	0.547143	circRNA_0689|Chr1:259396273_259421082_-(Sorbs1);circRNA_0701|Chr1:259434763_259459540_-(Sorbs1);circRNA_6605|Chr8:107334721_107366975_-(Pik3cb);	rno04910
rno04911	Insulin secretion	Organismal Systems	Endocrine system	3	147	56	2681	0.60144	0.943725	0.977041	circRNA_0589|Chr1:233561451_233581182_+(Gnaq);circRNA_0591|Chr1:233578229_233581182_+(Gnaq);circRNA_4863|Chr4:151118221_151123637_-(Cacna1c);	rno04911
rno04912	GnRH signaling pathway	Organismal Systems	Endocrine system	4	147	83	2681	0.677475	0.943725	0.878944	circRNA_0589|Chr1:233561451_233581182_+(Gnaq);circRNA_0591|Chr1:233578229_233581182_+(Gnaq);circRNA_4863|Chr4:151118221_151123637_-(Cacna1c);circRNA_4949|Chr4:180721313_180722357_-(Itpr2);	rno04912
rno04913	Ovarian Steroidogenesis	Organismal Systems	Endocrine system	1	147	19	2681	0.658751	0.943725	0.9599	circRNA_5223|Chr5:115146569_115199307_-(Cyp2j3);	rno04913
rno04914	Progesterone-mediated oocyte maturation	Organismal Systems	Endocrine system	1	147	59	2681	0.965426	0.978564	0.30912	circRNA_6605|Chr8:107334721_107366975_-(Pik3cb);	rno04914
rno04915	Estrogen signaling pathway	Organismal Systems	Endocrine system	6	147	67	2681	0.15827	0.943725	1.63326	circRNA_0589|Chr1:233561451_233581182_+(Gnaq);circRNA_0591|Chr1:233578229_233581182_+(Gnaq);circRNA_1185|Chr10:88046855_88047023_+(Krt15);circRNA_3885|Chr20:4896892_4921063_-(Hspa1l);circRNA_4949|Chr4:180721313_180722357_-(Itpr2);circRNA_6605|Chr8:107334721_107366975_-(Pik3cb);	rno04915
rno04916	Melanogenesis	Organismal Systems	Endocrine system	4	147	48	2681	0.267714	0.943725	1.51984	circRNA_0589|Chr1:233561451_233581182_+(Gnaq);circRNA_0591|Chr1:233578229_233581182_+(Gnaq);circRNA_0848|Chr10:11626519_11627228_+(Crebbp);circRNA_6183|Chr7:122834692_122835329_+(Ep300);	rno04916
rno04917	Prolactin signaling pathway	Organismal Systems	Endocrine system	1	147	33	2681	0.846248	0.943725	0.55267	circRNA_6605|Chr8:107334721_107366975_-(Pik3cb);	rno04917
rno04918	Thyroid hormone synthesis	Organismal Systems	Endocrine system	4	147	46	2681	0.243159	0.943725	1.58592	circRNA_0589|Chr1:233561451_233581182_+(Gnaq);circRNA_0591|Chr1:233578229_233581182_+(Gnaq);circRNA_0904|Chr10:35816390_35818308_-(Canx);circRNA_4949|Chr4:180721313_180722357_-(Itpr2);	rno04918
rno04919	Thyroid hormone signaling pathway	Organismal Systems	Endocrine system	6	147	88	2681	0.351743	0.943725	1.24351	circRNA_0848|Chr10:11626519_11627228_+(Crebbp);circRNA_0972|Chr10:48749746_48753281_-(Ncor1);circRNA_1658|Chr12:43576497_43576734_-(Med13l);circRNA_6032|Chr7:60733754_60737965_-(Mdm2);circRNA_6183|Chr7:122834692_122835329_+(Ep300);circRNA_6605|Chr8:107334721_107366975_-(Pik3cb);	rno04919
rno04920	Adipocytokine signaling pathway	Organismal Systems	Endocrine system	1	147	30	2681	0.817537	0.943725	0.607937	circRNA_4041|Chr3:2762162_2764477_-(Traf2);	rno04920
rno04921	Oxytocin signaling pathway	Organismal Systems	Endocrine system	7	147	140	2681	0.657647	0.943725	0.911905	circRNA_0589|Chr1:233561451_233581182_+(Gnaq);circRNA_0591|Chr1:233578229_233581182_+(Gnaq);circRNA_3203|Chr19:38057557_38062193_+(Nfatc3);circRNA_4557|Chr4:15859003_15915406_-(Cacna2d1);circRNA_4863|Chr4:151118221_151123637_-(Cacna1c);circRNA_4949|Chr4:180721313_180722357_-(Itpr2);circRNA_6264|Chr8:439822_456940_+(Gucy1a2);	rno04921
rno04922	Glucagon signaling pathway	Organismal Systems	Endocrine system	6	147	88	2681	0.351743	0.943725	1.24351	circRNA_0589|Chr1:233561451_233581182_+(Gnaq);circRNA_0591|Chr1:233578229_233581182_+(Gnaq);circRNA_0722|Chr1:261165387_261165588_-(Pgam1);circRNA_0848|Chr10:11626519_11627228_+(Crebbp);circRNA_4949|Chr4:180721313_180722357_-(Itpr2);circRNA_6183|Chr7:122834692_122835329_+(Ep300);	rno04922
rno04923	Regulation of lipolysis in adipocyte	Organismal Systems	Endocrine system	1	147	35	2681	0.862848	0.943725	0.521088	circRNA_6605|Chr8:107334721_107366975_-(Pik3cb);	rno04923
rno04924	Renin secretion	Organismal Systems	Endocrine system	5	147	65	2681	0.283065	0.943725	1.40293	circRNA_0589|Chr1:233561451_233581182_+(Gnaq);circRNA_0591|Chr1:233578229_233581182_+(Gnaq);circRNA_4863|Chr4:151118221_151123637_-(Cacna1c);circRNA_4949|Chr4:180721313_180722357_-(Itpr2);circRNA_6264|Chr8:439822_456940_+(Gucy1a2);	rno04924
rno04925	Aldosterone synthesis and secretion	Organismal Systems	Endocrine system	4	147	62	2681	0.444878	0.943725	1.17665	circRNA_0589|Chr1:233561451_233581182_+(Gnaq);circRNA_0591|Chr1:233578229_233581182_+(Gnaq);circRNA_4863|Chr4:151118221_151123637_-(Cacna1c);circRNA_4949|Chr4:180721313_180722357_-(Itpr2);	rno04925
rno04926	Relaxin signaling pathway	Organismal Systems	Endocrine system	3	147	104	2681	0.93265	0.958921	0.526099	circRNA_2592|Chr16:83563772_83585327_+(Col4a1);circRNA_3057|Chr18:72593000_72595275_+(Smad2);circRNA_6605|Chr8:107334721_107366975_-(Pik3cb);	rno04926
rno04927	Cortisol synthesis and secretion	Organismal Systems	Endocrine system	5	147	49	2681	0.127679	0.943725	1.86103	circRNA_0589|Chr1:233561451_233581182_+(Gnaq);circRNA_0591|Chr1:233578229_233581182_+(Gnaq);circRNA_4863|Chr4:151118221_151123637_-(Cacna1c);circRNA_4949|Chr4:180721313_180722357_-(Itpr2);circRNA_6157|Chr7:116072198_116158807_-(Cyp11b3);	rno04927
rno04930	Type II diabetes mellitus	Human Diseases	Endocrine and metabolic disease	2	147	18	2681	0.259115	0.943725	2.02646	circRNA_4863|Chr4:151118221_151123637_-(Cacna1c);circRNA_6605|Chr8:107334721_107366975_-(Pik3cb);	rno04930
rno04931	Insulin resistance	Human Diseases	Endocrine and metabolic disease	2	147	51	2681	0.779766	0.943725	0.715219	circRNA_0647|Chr1:251455609_251485480_+(Pten);circRNA_6605|Chr8:107334721_107366975_-(Pik3cb);	rno04931
rno04932	Non-alcoholic fatty liver disease (NAFLD)	Human Diseases	Endocrine and metabolic disease	4	147	59	2681	0.40715	0.943725	1.23648	circRNA_0035|Chr1:15488392_15526167_+(Map3k5);circRNA_0038|Chr1:15545013_15551204_+(Map3k5);circRNA_4041|Chr3:2762162_2764477_-(Traf2);circRNA_6605|Chr8:107334721_107366975_-(Pik3cb);	rno04932
rno04933	AGE-RAGE signaling pathway in diabetic complications	Human Diseases	Endocrine and metabolic disease	3	147	94	2681	0.898597	0.958921	0.582067	circRNA_2592|Chr16:83563772_83585327_+(Col4a1);circRNA_3057|Chr18:72593000_72595275_+(Smad2);circRNA_6605|Chr8:107334721_107366975_-(Pik3cb);	rno04933
rno04934	Cushing's syndrome	Human Diseases	Endocrine and metabolic disease	6	147	79	2681	0.26349	0.943725	1.38517	circRNA_0589|Chr1:233561451_233581182_+(Gnaq);circRNA_0591|Chr1:233578229_233581182_+(Gnaq);circRNA_4863|Chr4:151118221_151123637_-(Cacna1c);circRNA_4949|Chr4:180721313_180722357_-(Itpr2);circRNA_6157|Chr7:116072198_116158807_-(Cyp11b3);circRNA_6243|Chr7:140533891_140536242_-(Kmt2d);	rno04934
rno04940	Type I diabetes mellitus	Human Diseases	Endocrine and metabolic disease	2	147	15	2681	0.197107	0.943725	2.43175	circRNA_3871|Chr20:3232306_3247033_+(RT1-T24-3);circRNA_4601|Chr4:34671682_34674413_-(Ica1);	rno04940
rno04960	Aldosterone-regulated sodium reabsorption	Organismal Systems	Excretory system	2	147	23	2681	0.362249	0.943725	1.58592	circRNA_3005|Chr18:60572935_60578301_+(Nedd4l);circRNA_6605|Chr8:107334721_107366975_-(Pik3cb);	rno04960
rno04961	Endocrine and other factor-regulated calcium reabsorption	Organismal Systems	Excretory system	2	147	39	2681	0.640291	0.943725	0.935287	circRNA_0589|Chr1:233561451_233581182_+(Gnaq);circRNA_0591|Chr1:233578229_233581182_+(Gnaq);	rno04961
rno04962	Vasopressin-regulated water reabsorption	Organismal Systems	Excretory system	2	147	13	2681	0.156967	0.943725	2.80586	circRNA_1266|Chr10:109754888_109755050_+(Arhgdia);circRNA_1267|Chr10:109754906_109755050_+(Arhgdia);	rno04962
rno04970	Salivary secretion	Organismal Systems	Digestive system	4	147	67	2681	0.506006	0.943725	1.08884	circRNA_0589|Chr1:233561451_233581182_+(Gnaq);circRNA_0591|Chr1:233578229_233581182_+(Gnaq);circRNA_4949|Chr4:180721313_180722357_-(Itpr2);circRNA_6264|Chr8:439822_456940_+(Gucy1a2);	rno04970
rno04971	Gastric acid secretion	Organismal Systems	Digestive system	3	147	49	2681	0.509346	0.943725	1.11662	circRNA_0589|Chr1:233561451_233581182_+(Gnaq);circRNA_0591|Chr1:233578229_233581182_+(Gnaq);circRNA_4949|Chr4:180721313_180722357_-(Itpr2);	rno04971
rno04972	Pancreatic secretion	Organismal Systems	Digestive system	3	147	55	2681	0.588987	0.943725	0.994805	circRNA_0589|Chr1:233561451_233581182_+(Gnaq);circRNA_0591|Chr1:233578229_233581182_+(Gnaq);circRNA_4949|Chr4:180721313_180722357_-(Itpr2);	rno04972
rno04973	Carbohydrate digestion and absorption	Organismal Systems	Digestive system	1	147	17	2681	0.617719	0.943725	1.07283	circRNA_6605|Chr8:107334721_107366975_-(Pik3cb);	rno04973
rno04974	Protein digestion and absorption	Organismal Systems	Digestive system	3	147	58	2681	0.625601	0.943725	0.94335	circRNA_2592|Chr16:83563772_83585327_+(Col4a1);circRNA_3914|Chr20:12666784_12667523_+(Col6a1);circRNA_3915|Chr20:12784683_12785573_+(Col6a2);	rno04974
rno04976	Bile secretion	Organismal Systems	Digestive system	1	147	19	2681	0.658751	0.943725	0.9599	circRNA_2406|Chr15:103706020_103717662_-(Abcc4);	rno04976
rno04977	Vitamin digestion and absorption	Organismal Systems	Digestive system	2	147	8	2681	0.0672544	0.943725	4.55952	circRNA_0786|Chr10:574395_593608_-(Abcc1);circRNA_3912|Chr20:12339749_12342262_-(Slc19a1);	rno04977
rno05010	Alzheimer's disease	Human Diseases	Neurodegenerative disease	4	147	92	2681	0.753939	0.943725	0.792961	circRNA_0589|Chr1:233561451_233581182_+(Gnaq);circRNA_0591|Chr1:233578229_233581182_+(Gnaq);circRNA_4863|Chr4:151118221_151123637_-(Cacna1c);circRNA_4949|Chr4:180721313_180722357_-(Itpr2);	rno05010
rno05014	Amyotrophic lateral sclerosis (ALS)	Human Diseases	Neurodegenerative disease	2	147	30	2681	0.496314	0.943725	1.21587	circRNA_0035|Chr1:15488392_15526167_+(Map3k5);circRNA_0038|Chr1:15545013_15551204_+(Map3k5);	rno05014
rno05016	Huntington's disease	Human Diseases	Neurodegenerative disease	5	147	61	2681	0.240534	0.943725	1.49493	circRNA_0589|Chr1:233561451_233581182_+(Gnaq);circRNA_0591|Chr1:233578229_233581182_+(Gnaq);circRNA_0848|Chr10:11626519_11627228_+(Crebbp);circRNA_0984|Chr10:56342097_56352370_-(Polr2a);circRNA_6183|Chr7:122834692_122835329_+(Ep300);	rno05016
rno05030	Cocaine addiction	Human Diseases	Substance dependence	1	147	15	2681	0.57179	0.943725	1.21587	circRNA_4049|Chr3:3785953_3786880_+(Gpsm1);	rno05030
rno05031	Amphetamine addiction	Human Diseases	Substance dependence	1	147	45	2681	0.922638	0.958921	0.405291	circRNA_4863|Chr4:151118221_151123637_-(Cacna1c);	rno05031
rno05100	Bacterial invasion of epithelial cells	Human Diseases	Infectious disease: bacterial	3	147	89	2681	0.876364	0.945437	0.614767	circRNA_1255|Chr10:106264856_106265494_+(Sept9);circRNA_6153|Chr7:114523676_114540933_-(Ptk2);circRNA_6605|Chr8:107334721_107366975_-(Pik3cb);	rno05100
rno05134	Legionellosis	Human Diseases	Infectious disease: bacterial	3	147	13	2681	0.0307857	0.770853	4.20879	circRNA_3367|Chr2:30384653_30433774_-(Naip6);circRNA_3369|Chr2:30410157_30454166_-(Naip5);circRNA_3885|Chr20:4896892_4921063_-(Hspa1l);	rno05134
rno05142	Chagas disease (American trypanosomiasis)	Human Diseases	Infectious disease: parasitic	4	147	52	2681	0.317989	0.943725	1.40293	circRNA_0589|Chr1:233561451_233581182_+(Gnaq);circRNA_0591|Chr1:233578229_233581182_+(Gnaq);circRNA_3057|Chr18:72593000_72595275_+(Smad2);circRNA_6605|Chr8:107334721_107366975_-(Pik3cb);	rno05142
rno05143	African trypanosomiasis	Human Diseases	Infectious disease: parasitic	2	147	17	2681	0.238322	0.943725	2.14566	circRNA_0589|Chr1:233561451_233581182_+(Gnaq);circRNA_0591|Chr1:233578229_233581182_+(Gnaq);	rno05143
rno05145	Toxoplasmosis	Human Diseases	Infectious disease: parasitic	1	147	34	2681	0.854784	0.943725	0.536415	circRNA_3885|Chr20:4896892_4921063_-(Hspa1l);	rno05145
rno05146	Amoebiasis	Human Diseases	Infectious disease: parasitic	5	147	79	2681	0.438257	0.943725	1.15431	circRNA_0589|Chr1:233561451_233581182_+(Gnaq);circRNA_0591|Chr1:233578229_233581182_+(Gnaq);circRNA_2592|Chr16:83563772_83585327_+(Col4a1);circRNA_6153|Chr7:114523676_114540933_-(Ptk2);circRNA_6605|Chr8:107334721_107366975_-(Pik3cb);	rno05146
rno05150	Staphylococcus aureus infection	Human Diseases	Infectious disease: bacterial	2	147	6	2681	0.0387187	0.770853	6.07937	circRNA_1755|Chr13:57029508_57030242_-(Cfh);circRNA_1756|Chr13:57044027_57047903_-(Cfh);	rno05150
rno05152	Tuberculosis	Human Diseases	Infectious disease: bacterial	5	147	81	2681	0.460235	0.943725	1.12581	circRNA_0848|Chr10:11626519_11627228_+(Crebbp);circRNA_4148|Chr3:46525736_46558304_-(Pla2r1);circRNA_5011|Chr5:14282912_14314250_-(Atp6v1h);circRNA_5042|Chr5:29851601_29865341_-(Ripk2);circRNA_6183|Chr7:122834692_122835329_+(Ep300);	rno05152
rno05160	Hepatitis C	Human Diseases	Infectious disease: viral	3	147	59	2681	0.637304	0.943725	0.927361	circRNA_4041|Chr3:2762162_2764477_-(Traf2);circRNA_5882|Chr6:135672583_135696475_+(Traf3);circRNA_6605|Chr8:107334721_107366975_-(Pik3cb);	rno05160
rno05161	Hepatitis B	Human Diseases	Infectious disease: viral	5	147	79	2681	0.438257	0.943725	1.15431	circRNA_0647|Chr1:251455609_251485480_+(Pten);circRNA_0848|Chr10:11626519_11627228_+(Crebbp);circRNA_3203|Chr19:38057557_38062193_+(Nfatc3);circRNA_6183|Chr7:122834692_122835329_+(Ep300);circRNA_6605|Chr8:107334721_107366975_-(Pik3cb);	rno05161
rno05162	Measles	Human Diseases	Infectious disease: viral	2	147	28	2681	0.459747	0.943725	1.30272	circRNA_3885|Chr20:4896892_4921063_-(Hspa1l);circRNA_6605|Chr8:107334721_107366975_-(Pik3cb);	rno05162
rno05164	Influenza A	Human Diseases	Infectious disease: viral	4	147	67	2681	0.506006	0.943725	1.08884	circRNA_0848|Chr10:11626519_11627228_+(Crebbp);circRNA_3885|Chr20:4896892_4921063_-(Hspa1l);circRNA_6183|Chr7:122834692_122835329_+(Ep300);circRNA_6605|Chr8:107334721_107366975_-(Pik3cb);	rno05164
rno05165	Human papillomavirus infection	Human Diseases	Infectious disease: viral	14	147	188	2681	0.144913	0.943725	1.35816	circRNA_0647|Chr1:251455609_251485480_+(Pten);circRNA_0848|Chr10:11626519_11627228_+(Crebbp);circRNA_2592|Chr16:83563772_83585327_+(Col4a1);circRNA_3871|Chr20:3232306_3247033_+(RT1-T24-3);circRNA_3914|Chr20:12666784_12667523_+(Col6a1);circRNA_3915|Chr20:12784683_12785573_+(Col6a2);circRNA_4377|Chr3:130093308_130099815_-(Jag1);circRNA_5882|Chr6:135672583_135696475_+(Traf3);circRNA_6032|Chr7:607337…	rno05165
rno05166	HTLV-I infection	Human Diseases	Infectious disease: viral	7	147	143	2681	0.679771	0.943725	0.892774	circRNA_0848|Chr10:11626519_11627228_+(Crebbp);circRNA_0904|Chr10:35816390_35818308_-(Canx);circRNA_3057|Chr18:72593000_72595275_+(Smad2);circRNA_3203|Chr19:38057557_38062193_+(Nfatc3);circRNA_3871|Chr20:3232306_3247033_+(RT1-T24-3);circRNA_6183|Chr7:122834692_122835329_+(Ep300);circRNA_6605|Chr8:107334721_107366975_-(Pik3cb);	rno05166
rno05167	Kaposi's sarcoma-associated herpesvirus infection	Human Diseases	Infectious disease: viral	8	147	98	2681	0.165833	0.943725	1.48882	circRNA_0848|Chr10:11626519_11627228_+(Crebbp);circRNA_3203|Chr19:38057557_38062193_+(Nfatc3);circRNA_3871|Chr20:3232306_3247033_+(RT1-T24-3);circRNA_4041|Chr3:2762162_2764477_-(Traf2);circRNA_4949|Chr4:180721313_180722357_-(Itpr2);circRNA_5882|Chr6:135672583_135696475_+(Traf3);circRNA_6183|Chr7:122834692_122835329_+(Ep300);circRNA_6605|Chr8:107334721_107366975_-(Pik3cb);	rno05167
rno05168	Herpes simplex infection	Human Diseases	Infectious disease: viral	6	147	64	2681	0.135446	0.943725	1.70982	circRNA_0848|Chr10:11626519_11627228_+(Crebbp);circRNA_0984|Chr10:56342097_56352370_-(Polr2a);circRNA_3871|Chr20:3232306_3247033_+(RT1-T24-3);circRNA_4041|Chr3:2762162_2764477_-(Traf2);circRNA_5882|Chr6:135672583_135696475_+(Traf3);circRNA_6183|Chr7:122834692_122835329_+(Ep300);	rno05168
rno05169	Epstein-Barr virus infection	Human Diseases	Infectious disease: viral	10	147	93	2681	0.0288703	0.770853	1.96109	circRNA_0848|Chr10:11626519_11627228_+(Crebbp);circRNA_0984|Chr10:56342097_56352370_-(Polr2a);circRNA_2557|Chr16:62132750_62160831_-(Gtf2e2);circRNA_3871|Chr20:3232306_3247033_+(RT1-T24-3);circRNA_3885|Chr20:4896892_4921063_-(Hspa1l);circRNA_4041|Chr3:2762162_2764477_-(Traf2);circRNA_5882|Chr6:135672583_135696475_+(Traf3);circRNA_6032|Chr7:60733754_60737965_-(Mdm2);circRNA_6183|Chr7:122834692_122…	rno05169
rno05200	Pathways in cancer	Human Diseases	Cancer: overview	16	147	258	2681	0.337805	0.943725	1.13104	circRNA_0589|Chr1:233561451_233581182_+(Gnaq);circRNA_0591|Chr1:233578229_233581182_+(Gnaq);circRNA_0647|Chr1:251455609_251485480_+(Pten);circRNA_0848|Chr10:11626519_11627228_+(Crebbp);circRNA_2592|Chr16:83563772_83585327_+(Col4a1);circRNA_2606|Chr17:1059417_1065593_-(Ptch1);circRNA_3057|Chr18:72593000_72595275_+(Smad2);circRNA_3744|Chr2:210806416_210806638_+(Gstm1);circRNA_3745|Chr2:210808354_21…	rno05200
rno05202	Transcriptional misregulation in cancers	Human Diseases	Cancer: overview	8	147	93	2681	0.134292	0.943725	1.56887	circRNA_0972|Chr10:48749746_48753281_-(Ncor1);circRNA_1949|Chr14:7291691_7293326_-(Aff1);circRNA_2865|Chr18:6047215_6051719_-(Ss18);circRNA_4565|Chr4:26336094_26341599_+(Cdk14);circRNA_5208|Chr5:106171074_106171781_-(Mllt3);circRNA_6032|Chr7:60733754_60737965_-(Mdm2);circRNA_6153|Chr7:114523676_114540933_-(Ptk2);circRNA_6753|Chr9:18653895_18660843_+(Runx2);	rno05202
rno05203	Viral carcinogenesis	Human Diseases	Cancer: overview	8	147	84	2681	0.0863172	0.943725	1.73696	circRNA_0848|Chr10:11626519_11627228_+(Crebbp);circRNA_2557|Chr16:62132750_62160831_-(Gtf2e2);circRNA_3871|Chr20:3232306_3247033_+(RT1-T24-3);circRNA_4041|Chr3:2762162_2764477_-(Traf2);circRNA_5882|Chr6:135672583_135696475_+(Traf3);circRNA_6032|Chr7:60733754_60737965_-(Mdm2);circRNA_6183|Chr7:122834692_122835329_+(Ep300);circRNA_6605|Chr8:107334721_107366975_-(Pik3cb);	rno05203
rno05204	Chemical carcinogenesis	Human Diseases	Cancer: overview	2	147	15	2681	0.197107	0.943725	2.43175	circRNA_3744|Chr2:210806416_210806638_+(Gstm1);circRNA_3745|Chr2:210808354_210822401_-(Gstm1);	rno05204
rno05205	Proteoglycans in cancer	Human Diseases	Cancer: overview	7	147	166	2681	0.818589	0.943725	0.769076	circRNA_1305|Chr11:30029802_30036752_-(Tiam1);circRNA_2606|Chr17:1059417_1065593_-(Ptch1);circRNA_3057|Chr18:72593000_72595275_+(Smad2);circRNA_4949|Chr4:180721313_180722357_-(Itpr2);circRNA_6032|Chr7:60733754_60737965_-(Mdm2);circRNA_6153|Chr7:114523676_114540933_-(Ptk2);circRNA_6605|Chr8:107334721_107366975_-(Pik3cb);	rno05205
rno05206	MicroRNAs in cancer	Human Diseases	Cancer: overview	6	147	82	2681	0.292349	0.943725	1.33449	circRNA_0647|Chr1:251455609_251485480_+(Pten);circRNA_0786|Chr10:574395_593608_-(Abcc1);circRNA_0848|Chr10:11626519_11627228_+(Crebbp);circRNA_1505|Chr12:8089735_8096761_+(Slc7a1);circRNA_6032|Chr7:60733754_60737965_-(Mdm2);circRNA_6183|Chr7:122834692_122835329_+(Ep300);	rno05206
rno05210	Colorectal cancer	Human Diseases	Cancer: specific types	2	147	61	2681	0.85754	0.943725	0.59797	circRNA_3057|Chr18:72593000_72595275_+(Smad2);circRNA_6605|Chr8:107334721_107366975_-(Pik3cb);	rno05210
rno05211	Renal cell carcinoma	Human Diseases	Cancer: specific types	3	147	52	2681	0.550186	0.943725	1.0522	circRNA_0848|Chr10:11626519_11627228_+(Crebbp);circRNA_6183|Chr7:122834692_122835329_+(Ep300);circRNA_6605|Chr8:107334721_107366975_-(Pik3cb);	rno05211
rno05212	Pancreatic cancer	Human Diseases	Cancer: specific types	2	147	61	2681	0.85754	0.943725	0.59797	circRNA_3057|Chr18:72593000_72595275_+(Smad2);circRNA_6605|Chr8:107334721_107366975_-(Pik3cb);	rno05212
rno05213	Endometrial cancer	Human Diseases	Cancer: specific types	2	147	43	2681	0.693156	0.943725	0.848283	circRNA_0647|Chr1:251455609_251485480_+(Pten);circRNA_6605|Chr8:107334721_107366975_-(Pik3cb);	rno05213
rno05214	Glioma	Human Diseases	Cancer: specific types	3	147	47	2681	0.481089	0.943725	1.16413	circRNA_0647|Chr1:251455609_251485480_+(Pten);circRNA_6032|Chr7:60733754_60737965_-(Mdm2);circRNA_6605|Chr8:107334721_107366975_-(Pik3cb);	rno05214
rno05215	Prostate cancer	Human Diseases	Cancer: specific types	5	147	62	2681	0.251005	0.943725	1.47081	circRNA_0647|Chr1:251455609_251485480_+(Pten);circRNA_0848|Chr10:11626519_11627228_+(Crebbp);circRNA_6032|Chr7:60733754_60737965_-(Mdm2);circRNA_6183|Chr7:122834692_122835329_+(Ep300);circRNA_6605|Chr8:107334721_107366975_-(Pik3cb);	rno05215
rno05217	Basal cell carcinoma	Human Diseases	Cancer: specific types	1	147	9	2681	0.398481	0.943725	2.02646	circRNA_2606|Chr17:1059417_1065593_-(Ptch1);	rno05217
rno05218	Melanoma	Human Diseases	Cancer: specific types	3	147	38	2681	0.346555	0.943725	1.43985	circRNA_0647|Chr1:251455609_251485480_+(Pten);circRNA_6032|Chr7:60733754_60737965_-(Mdm2);circRNA_6605|Chr8:107334721_107366975_-(Pik3cb);	rno05218
rno05219	Bladder cancer	Human Diseases	Cancer: specific types	1	147	27	2681	0.783507	0.943725	0.675485	circRNA_6032|Chr7:60733754_60737965_-(Mdm2);	rno05219
rno05220	Chronic myeloid leukemia	Human Diseases	Cancer: specific types	2	147	51	2681	0.779766	0.943725	0.715219	circRNA_6032|Chr7:60733754_60737965_-(Mdm2);circRNA_6605|Chr8:107334721_107366975_-(Pik3cb);	rno05220
rno05221	Acute myeloid leukemia	Human Diseases	Cancer: specific types	1	147	36	2681	0.870468	0.943725	0.506614	circRNA_6605|Chr8:107334721_107366975_-(Pik3cb);	rno05221
rno05222	Small cell lung cancer	Human Diseases	Cancer: specific types	6	147	62	2681	0.121172	0.943725	1.76498	circRNA_0647|Chr1:251455609_251485480_+(Pten);circRNA_2592|Chr16:83563772_83585327_+(Col4a1);circRNA_4041|Chr3:2762162_2764477_-(Traf2);circRNA_5882|Chr6:135672583_135696475_+(Traf3);circRNA_6153|Chr7:114523676_114540933_-(Ptk2);circRNA_6605|Chr8:107334721_107366975_-(Pik3cb);	rno05222
rno05223	Non-small cell lung cancer	Human Diseases	Cancer: specific types	1	147	47	2681	0.931027	0.958921	0.388045	circRNA_6605|Chr8:107334721_107366975_-(Pik3cb);	rno05223
rno05224	Breast cancer	Human Diseases	Cancer: specific types	3	147	57	2681	0.613646	0.943725	0.9599	circRNA_0647|Chr1:251455609_251485480_+(Pten);circRNA_4377|Chr3:130093308_130099815_-(Jag1);circRNA_6605|Chr8:107334721_107366975_-(Pik3cb);	rno05224
rno05225	Hepatocellular carcinoma	Human Diseases	Cancer: specific types	5	147	102	2681	0.668217	0.943725	0.894024	circRNA_0647|Chr1:251455609_251485480_+(Pten);circRNA_3057|Chr18:72593000_72595275_+(Smad2);circRNA_3744|Chr2:210806416_210806638_+(Gstm1);circRNA_3745|Chr2:210808354_210822401_-(Gstm1);circRNA_6605|Chr8:107334721_107366975_-(Pik3cb);	rno05225
rno05226	Gastric cancer	Human Diseases	Cancer: specific types	2	147	76	2681	0.928352	0.958921	0.47995	circRNA_3057|Chr18:72593000_72595275_+(Smad2);circRNA_6605|Chr8:107334721_107366975_-(Pik3cb);	rno05226
rno05230	Central carbon metabolism in cancer	Human Diseases	Cancer: overview	3	147	34	2681	0.285169	0.943725	1.60924	circRNA_0647|Chr1:251455609_251485480_+(Pten);circRNA_0722|Chr1:261165387_261165588_-(Pgam1);circRNA_6605|Chr8:107334721_107366975_-(Pik3cb);	rno05230
rno05231	Choline metabolism in cancer	Human Diseases	Cancer: overview	1	147	61	2681	0.969194	0.978564	0.298985	circRNA_6605|Chr8:107334721_107366975_-(Pik3cb);	rno05231
rno05320	Autoimmune thyroid disease	Human Diseases	Immune disease	1	147	11	2681	0.462857	0.943725	1.65801	circRNA_3871|Chr20:3232306_3247033_+(RT1-T24-3);	rno05320
rno05321	Inflammatiory bowel disease (IBD)	Human Diseases	Immune disease	1	147	14	2681	0.546811	0.943725	1.30272	circRNA_3057|Chr18:72593000_72595275_+(Smad2);	rno05321
rno05323	Rheumatoid arthritis	Human Diseases	Immune disease	1	147	17	2681	0.617719	0.943725	1.07283	circRNA_5011|Chr5:14282912_14314250_-(Atp6v1h);	rno05323
rno05330	Allograft rejection	Human Diseases	Immune disease	1	147	11	2681	0.462857	0.943725	1.65801	circRNA_3871|Chr20:3232306_3247033_+(RT1-T24-3);	rno05330
rno05332	Graft-versus-host disease	Human Diseases	Immune disease	1	147	11	2681	0.462857	0.943725	1.65801	circRNA_3871|Chr20:3232306_3247033_+(RT1-T24-3);	rno05332
rno05410	Hypertrophic cardiomyopathy (HCM)	Human Diseases	Cardiovascular disease	3	147	60	2681	0.648752	0.943725	0.911905	circRNA_1738|Chr13:52667988_52673721_+(Tnnt2);circRNA_4557|Chr4:15859003_15915406_-(Cacna2d1);circRNA_4863|Chr4:151118221_151123637_-(Cacna1c);	rno05410
rno05412	Arrhythmogenic right ventricular cardiomyopathy (ARVC)	Human Diseases	Cardiovascular disease	2	147	59	2681	0.844317	0.943725	0.618241	circRNA_4557|Chr4:15859003_15915406_-(Cacna2d1);circRNA_4863|Chr4:151118221_151123637_-(Cacna1c);	rno05412
rno05414	Dilated cardiomyopathy (DCM)	Human Diseases	Cardiovascular disease	3	147	69	2681	0.740284	0.943725	0.792961	circRNA_1738|Chr13:52667988_52673721_+(Tnnt2);circRNA_4557|Chr4:15859003_15915406_-(Cacna2d1);circRNA_4863|Chr4:151118221_151123637_-(Cacna1c);	rno05414
rno05416	Viral myocarditis	Human Diseases	Cardiovascular disease	2	147	22	2681	0.341916	0.943725	1.65801	circRNA_3871|Chr20:3232306_3247033_+(RT1-T24-3);circRNA_5413|Chr5:156506448_156517254_+(Eif4g3);	rno05416
rno05418	Fluid shear stress and atherosclerosis	Human Diseases	Cardiovascular disease	6	147	81	2681	0.28265	0.943725	1.35097	circRNA_0035|Chr1:15488392_15526167_+(Map3k5);circRNA_0038|Chr1:15545013_15551204_+(Map3k5);circRNA_3744|Chr2:210806416_210806638_+(Gstm1);circRNA_3745|Chr2:210808354_210822401_-(Gstm1);circRNA_6153|Chr7:114523676_114540933_-(Ptk2);circRNA_6605|Chr8:107334721_107366975_-(Pik3cb);	rno05418

## Sheet: up-regulated (SSCI–3 vs. sham)
id	Term	Classification_level1	Classification_level2	ListHits	ListTotal	PopHits	PopTotal	p-value	q-value	Enrichment_score	Gene	hyperlink_only_excel
rno00010	Glycolysis / Gluconeogenesis	Metabolism	Carbohydrate metabolism	1	201	5	2681	0.322915	0.985586	2.66766	circRNA_0722|Chr1:261165387_261165588_-(Pgam1);	rno00010
rno00020	Citrate cycle (TCA cycle)	Metabolism	Carbohydrate metabolism	2	201	16	2681	0.340061	0.985586	1.66729	circRNA_1186|Chr10:88397108_88397582_-(Acly);circRNA_5064|Chr5:56464202_56465739_+(Aco1);	rno00020
rno00230	Purine metabolism	Metabolism	Nucleotide metabolism	2	201	57	2681	0.935813	0.994955	0.468011	circRNA_2001|Chr14:33083680_33089673_-(Polr2b);circRNA_5079|Chr5:59143243_59144331_+(Npr2);	rno00230
rno00240	Pyrimidine metabolism	Metabolism	Nucleotide metabolism	2	201	19	2681	0.422666	0.985586	1.40403	circRNA_1840|Chr13:85397122_85399509_-(Uck2);circRNA_2001|Chr14:33083680_33089673_-(Polr2b);	rno00240
rno00280	Valine, leucine and isoleucine degradation	Metabolism	Amino acid metabolism	1	201	35	2681	0.9358	0.994955	0.381095	circRNA_3361|Chr2:30216416_30228352_-(Mccc2);	rno00280
rno00310	Lysine degradation	Metabolism	Amino acid metabolism	9	201	83	2681	0.165503	0.985586	1.44632	circRNA_0535|Chr1:219018599_219028923_+(Kmt5b);circRNA_3568|Chr2:140592437_140597578_-(Setd7);circRNA_3645|Chr2:188266536_188309036_+(Ash1l);circRNA_3652|Chr2:188281555_188286112_+(Ash1l);circRNA_3654|Chr2:188281555_188309036_+(Ash1l);circRNA_3658|Chr2:188298849_188309036_+(Ash1l);circRNA_3667|Chr2:188378866_188380644_+(Ash1l);circRNA_4626|Chr4:50180977_50200342_-(Aass);circRNA_5439|Chr5:16179486…	rno00310
rno00480	Glutathione metabolism	Metabolism	Metabolism of other amino acids	2	201	15	2681	0.311655	0.985586	1.77844	circRNA_3745|Chr2:210808354_210822401_-(Gstm1);circRNA_5277|Chr5:128468460_128473338_+(Txndc12);	rno00480
rno00510	N-Glycan biosynthesis	Metabolism	Glycan biosynthesis and metabolism	1	201	21	2681	0.806589	0.985586	0.635158	circRNA_3706|Chr2:202970800_202998292_-(Man1a2);	rno00510
rno00512	Mucin type O-glycan biosynthesis	Metabolism	Glycan biosynthesis and metabolism	1	201	10	2681	0.541904	0.985586	1.33383	circRNA_3274|Chr19:57064910_57073804_+(Galnt2);	rno00512
rno00515	Mannose type O-glycan biosyntheis	Metabolism	Glycan biosynthesis and metabolism	2	201	14	2681	0.283005	0.985586	1.90547	circRNA_3105|Chr19:12536114_12555807_-(Large1);circRNA_5050|Chr5:40131915_40156826_-(Fut9);	rno00515
rno00520	Amino sugar and nucleotide sugar metabolism	Metabolism	Carbohydrate metabolism	1	201	22	2681	0.821204	0.985586	0.606287	circRNA_6576|Chr8:94718121_94730732_+(Cyb5r4);	rno00520
rno00562	Inositol phosphate metabolism	Metabolism	Carbohydrate metabolism	10	201	77	2681	0.0587946	0.985586	1.73225	circRNA_0388|Chr1:185233419_185234547_+(Pik3c2a);circRNA_0647|Chr1:251455609_251485480_+(Pten);circRNA_0677|Chr1:257183839_257192683_+(Plce1);circRNA_0679|Chr1:257191149_257192683_+(Plce1);circRNA_2073|Chr14:60581951_60586776_-(Pi4k2b);circRNA_2831|Chr18:301858_306376_-(Mtmr1);circRNA_4375|Chr3:128863086_128865813_+(Plcb4);circRNA_4376|Chr3:128908691_128911559_+(Plcb4);circRNA_6917|Chr9:71915420_…	rno00562
rno00563	Glycosylphosphatidylinositol(GPI)-anchor biosynthesis	Metabolism	Glycan biosynthesis and metabolism	1	201	7	2681	0.420828	0.985586	1.90547	circRNA_1685|Chr13:25616432_25627356_-(Pign);	rno00563
rno00564	Glycerophospholipid metabolism	Metabolism	Lipid metabolism	5	201	42	2681	0.202976	0.985586	1.58789	circRNA_1955|Chr14:9421418_9440942_-(Cds1);circRNA_3513|Chr2:113739689_113747247_+(Pld1);circRNA_3516|Chr2:113788385_113806098_+(Pld1);circRNA_3736|Chr2:209143856_209152642_-(Cept1);circRNA_5564|Chr6:25409775_25417047_-(Plb1);	rno00564
rno00565	Ether lipid metabolism	Metabolism	Lipid metabolism	5	201	28	2681	0.0537209	0.985586	2.38184	circRNA_3513|Chr2:113739689_113747247_+(Pld1);circRNA_3516|Chr2:113788385_113806098_+(Pld1);circRNA_3736|Chr2:209143856_209152642_-(Cept1);circRNA_4198|Chr3:62696762_62733674_+(Agps);circRNA_5564|Chr6:25409775_25417047_-(Plb1);	rno00565
rno00590	Arachidonic acid metabolism	Metabolism	Lipid metabolism	1	201	10	2681	0.541904	0.985586	1.33383	circRNA_5564|Chr6:25409775_25417047_-(Plb1);	rno00590
rno00591	Linoleic acid metabolism	Metabolism	Lipid metabolism	1	201	6	2681	0.373773	0.985586	2.22305	circRNA_5564|Chr6:25409775_25417047_-(Plb1);	rno00591
rno00592	alpha-Linolenic acid metabolism	Metabolism	Lipid metabolism	1	201	10	2681	0.541904	0.985586	1.33383	circRNA_5564|Chr6:25409775_25417047_-(Plb1);	rno00592
rno00600	Sphingolipid metabolism	Metabolism	Lipid metabolism	2	201	26	2681	0.591589	0.985586	1.02602	circRNA_0310|Chr1:163182618_163216364_-(Acer3);circRNA_2887|Chr18:15480332_15494701_+(B4galt6);	rno00600
rno00601	Glycosphingolipid biosynthesis - lacto and neolacto series	Metabolism	Glycan biosynthesis and metabolism	1	201	5	2681	0.322915	0.985586	2.66766	circRNA_5050|Chr5:40131915_40156826_-(Fut9);	rno00601
rno00604	Glycosphingolipid biosynthesis - ganglio series	Metabolism	Glycan biosynthesis and metabolism	2	201	9	2681	0.142139	0.985586	2.96407	circRNA_3858|Chr2:259591896_259592305_-(St6galnac3);circRNA_4762|Chr4:99970321_99980034_+(St3gal5);	rno00604
rno00630	Glyoxylate and dicarboxylate metabolism	Metabolism	Carbohydrate metabolism	1	201	10	2681	0.541904	0.985586	1.33383	circRNA_5064|Chr5:56464202_56465739_+(Aco1);	rno00630
rno00770	Pantothenate and CoA biosynthesis	Metabolism	Metabolism of cofactors and vitamins	1	201	12	2681	0.608268	0.985586	1.11153	circRNA_4364|Chr3:123825681_123833222_+(Pank2);	rno00770
rno00980	Metabolism of xenobiotics by cytochrome P450	Metabolism	Xenobiotics biodegradation and metabolism	1	201	14	2681	0.665058	0.985586	0.952736	circRNA_3745|Chr2:210808354_210822401_-(Gstm1);	rno00980
rno00982	Drug metabolism - cytochrome P450	Metabolism	Xenobiotics biodegradation and metabolism	1	201	15	2681	0.690301	0.985586	0.889221	circRNA_3745|Chr2:210808354_210822401_-(Gstm1);	rno00982
rno00983	Drug metabolism - other enzymes	Metabolism	Xenobiotics biodegradation and metabolism	2	201	21	2681	0.474725	0.985586	1.27032	circRNA_1840|Chr13:85397122_85399509_-(Uck2);circRNA_3745|Chr2:210808354_210822401_-(Gstm1);	rno00983
rno01521	EGFR tyrosine kinase inhibitor resistance	Human Diseases	Drug resistance: antineoplastic	7	201	65	2681	0.210927	0.985586	1.43643	circRNA_0449|Chr1:200648164_200671090_-(Fgfr2);circRNA_0647|Chr1:251455609_251485480_+(Pten);circRNA_1058|Chr10:66812207_66822005_+(Nf1);circRNA_1060|Chr10:66897863_66898928_+(Nf1);circRNA_2564|Chr16:68958915_68959689_+(Eif4ebp1);circRNA_4703|Chr4:67449579_67455064_-(Braf);circRNA_5496|Chr6:3150789_3165551_-(Sos1);	rno01521
rno01522	Endocrine resistance	Human Diseases	Drug resistance: antineoplastic	3	201	66	2681	0.883753	0.985586	0.606287	circRNA_4703|Chr4:67449579_67455064_-(Braf);circRNA_5496|Chr6:3150789_3165551_-(Sos1);circRNA_6032|Chr7:60733754_60737965_-(Mdm2);	rno01522
rno01524	Platinum drug resistance	Human Diseases	Drug resistance: antineoplastic	6	201	45	2681	0.116326	0.985586	1.77844	circRNA_0032|Chr1:15474913_15494771_+(Map3k5);circRNA_0035|Chr1:15488392_15526167_+(Map3k5);circRNA_0038|Chr1:15545013_15551204_+(Map3k5);circRNA_3745|Chr2:210808354_210822401_-(Gstm1);circRNA_3996|Chr20:44854295_44866267_+(Rev3l);circRNA_6032|Chr7:60733754_60737965_-(Mdm2);	rno01524
rno02010	ABC transporters	Environmental Information Processing	Membrane transport	1	201	25	2681	0.858776	0.985586	0.533532	circRNA_3777|Chr2:225359048_225372948_-(Abcd3);	rno02010
rno03008	Ribosome biogenesis in eukaryotes	Genetic Information Processing	Translation	3	201	26	2681	0.308736	0.985586	1.53904	circRNA_3471|Chr2:62955690_62956953_+(Drosha);circRNA_4405|Chr3:147736963_147740988_+(Csnk2a1);circRNA_5775|Chr6:108797786_108802113_+(Fcf1);	rno03008
rno03013	RNA transport	Genetic Information Processing	Translation	6	201	58	2681	0.265597	0.985586	1.37983	circRNA_0432|Chr1:197981834_197983786_-(Eif3c);circRNA_0433|Chr1:197981834_197983858_-(Eif3c);circRNA_2564|Chr16:68958915_68959689_+(Eif4ebp1);circRNA_2766|Chr17:76245627_76265943_-(Upf2);circRNA_3273|Chr19:56720223_56722271_-(Nup133);circRNA_3456|Chr2:57212775_57217628_+(Nup155);	rno03013
rno03015	mRNA surveillance pathway	Genetic Information Processing	Translation	3	201	47	2681	0.696785	0.985586	0.851381	circRNA_2766|Chr17:76245627_76265943_-(Upf2);circRNA_2904|Chr18:24611733_24614740_+(Wdr33);circRNA_5840|Chr6:129621583_129636485_+(Papola);	rno03015
rno03018	RNA degradation	Genetic Information Processing	Folding, sorting and degradation	3	201	53	2681	0.7722	0.985586	0.754999	circRNA_0937|Chr10:43539819_43542903_+(Cnot8);circRNA_4735|Chr4:87017858_87018778_-(Lsm5);circRNA_6022|Chr7:59556898_59587314_-(Cnot2);	rno03018
rno03022	Basal transcription factors	Genetic Information Processing	Transcription	2	201	21	2681	0.474725	0.985586	1.27032	circRNA_1392|Chr11:66082755_66083227_+(Gtf2e1);circRNA_2557|Chr16:62132750_62160831_-(Gtf2e2);	rno03022
rno03040	Spliceosome	Genetic Information Processing	Transcription	3	201	30	2681	0.393227	0.985586	1.33383	circRNA_4494|Chr3:177140837_177145025_+(Prpf6);circRNA_4735|Chr4:87017858_87018778_-(Lsm5);circRNA_5942|Chr7:18519655_18535599_-(Hnrnpm);	rno03040
rno03060	Protein export	Genetic Information Processing	Folding, sorting and degradation	1	201	7	2681	0.420828	0.985586	1.90547	circRNA_0273|Chr1:142733786_142740091_-(Sec11a);	rno03060
rno03320	PPAR signaling pathway	Organismal Systems	Endocrine system	7	201	54	2681	0.105402	0.985586	1.72904	circRNA_0688|Chr1:259396273_259409897_-(Sorbs1);circRNA_0698|Chr1:259421033_259450845_-(Sorbs1);circRNA_0701|Chr1:259434763_259459540_-(Sorbs1);circRNA_4845|Chr4:147295666_147361944_+(Pparg);circRNA_4846|Chr4:147295666_147372423_+(Pparg);circRNA_6203|Chr7:126667194_126669197_+(Ppara);circRNA_6204|Chr7:126667194_126671241_+(Ppara);	rno03320
rno03450	Non-homologous end-joining	Genetic Information Processing	Replication and repair	1	201	9	2681	0.504641	0.985586	1.48203	circRNA_1480|Chr11:89316354_89332868_-(Prkdc);	rno03450
rno03460	Fanconi anemia pathway	Genetic Information Processing	Replication and repair	1	201	14	2681	0.665058	0.985586	0.952736	circRNA_3996|Chr20:44854295_44866267_+(Rev3l);	rno03460
rno04010	MAPK signaling pathway	Environmental Information Processing	Signal transduction	20	201	213	2681	0.168155	0.985586	1.25242	circRNA_0032|Chr1:15474913_15494771_+(Map3k5);circRNA_0035|Chr1:15488392_15526167_+(Map3k5);circRNA_0038|Chr1:15545013_15551204_+(Map3k5);circRNA_0449|Chr1:200648164_200671090_-(Fgfr2);circRNA_1021|Chr10:62540625_62581037_+(Taok1);circRNA_1023|Chr10:62566642_62575768_+(Taok1);circRNA_1058|Chr10:66812207_66822005_+(Nf1);circRNA_1060|Chr10:66897863_66898928_+(Nf1);circRNA_1215|Chr10:94307816_943208…	rno04010
rno04012	ErbB signaling pathway	Environmental Information Processing	Signal transduction	6	201	71	2681	0.44327	0.985586	1.12718	circRNA_2564|Chr16:68958915_68959689_+(Eif4ebp1);circRNA_3794|Chr2:231056605_231078948_+(Camk2d);circRNA_4703|Chr4:67449579_67455064_-(Braf);circRNA_5496|Chr6:3150789_3165551_-(Sos1);circRNA_7190|ChrX:114972099_114978572_+(Pak3);circRNA_7191|ChrX:114972099_114999004_+(Pak3);	rno04012
rno04014	Ras signaling pathway	Environmental Information Processing	Signal transduction	13	201	131	2681	0.178669	0.985586	1.32365	circRNA_0449|Chr1:200648164_200671090_-(Fgfr2);circRNA_0677|Chr1:257183839_257192683_+(Plce1);circRNA_0679|Chr1:257191149_257192683_+(Plce1);circRNA_1058|Chr10:66812207_66822005_+(Nf1);circRNA_1060|Chr10:66897863_66898928_+(Nf1);circRNA_3513|Chr2:113739689_113747247_+(Pld1);circRNA_3516|Chr2:113788385_113806098_+(Pld1);circRNA_5217|Chr5:113794314_113803150_+(Tek);circRNA_5467|Chr5:172936581_17295…	rno04014
rno04015	Rap1 signaling pathway	Environmental Information Processing	Signal transduction	11	201	139	2681	0.472687	0.985586	1.05555	circRNA_0449|Chr1:200648164_200671090_-(Fgfr2);circRNA_0589|Chr1:233561451_233581182_+(Gnaq);circRNA_0591|Chr1:233578229_233581182_+(Gnaq);circRNA_0677|Chr1:257183839_257192683_+(Plce1);circRNA_0679|Chr1:257191149_257192683_+(Plce1);circRNA_1547|Chr12:13717791_13718009_-(Actb);circRNA_4375|Chr3:128863086_128865813_+(Plcb4);circRNA_4376|Chr3:128908691_128911559_+(Plcb4);circRNA_4703|Chr4:67449579_…	rno04015
rno04020	Calcium signaling pathway	Environmental Information Processing	Signal transduction	12	201	116	2681	0.155591	0.985586	1.37983	circRNA_0589|Chr1:233561451_233581182_+(Gnaq);circRNA_0591|Chr1:233578229_233581182_+(Gnaq);circRNA_0677|Chr1:257183839_257192683_+(Plce1);circRNA_0679|Chr1:257191149_257192683_+(Plce1);circRNA_2339|Chr15:51936366_51954838_-(Ppp3cc);circRNA_3124|Chr19:22103121_22128599_-(Phkb);circRNA_3129|Chr19:22143641_22179584_-(Phkb);circRNA_3794|Chr2:231056605_231078948_+(Camk2d);circRNA_3821|Chr2:242041489_…	rno04020
rno04022	cGMP - PKG signaling pathway	Environmental Information Processing	Signal transduction	13	201	156	2681	0.386438	0.985586	1.11153	circRNA_0232|Chr1:128239552_128242835_-(Mef2a);circRNA_0233|Chr1:128239552_128243030_-(Mef2a);circRNA_0589|Chr1:233561451_233581182_+(Gnaq);circRNA_0591|Chr1:233578229_233581182_+(Gnaq);circRNA_2339|Chr15:51936366_51954838_-(Ppp3cc);circRNA_3203|Chr19:38057557_38062193_+(Nfatc3);circRNA_3821|Chr2:242041489_242041689_+(Ppp3ca);circRNA_4375|Chr3:128863086_128865813_+(Plcb4);circRNA_4376|Chr3:128908…	rno04022
rno04024	cAMP signaling pathway	Environmental Information Processing	Signal transduction	12	201	130	2681	0.265409	0.985586	1.23123	circRNA_0677|Chr1:257183839_257192683_+(Plce1);circRNA_0679|Chr1:257191149_257192683_+(Plce1);circRNA_2606|Chr17:1059417_1065593_-(Ptch1);circRNA_3513|Chr2:113739689_113747247_+(Pld1);circRNA_3516|Chr2:113788385_113806098_+(Pld1);circRNA_3794|Chr2:231056605_231078948_+(Camk2d);circRNA_4703|Chr4:67449579_67455064_-(Braf);circRNA_5986|Chr7:41167312_41167751_+(Atp2b1);circRNA_6004|Chr7:51453247_5147…	rno04024
rno04060	Cytokine-cytokine receptor interaction	Environmental Information Processing	Signaling molecules and interaction	2	201	32	2681	0.704972	0.985586	0.833644	circRNA_4478|Chr3:170905824_170929765_-(Bmp7);circRNA_6754|Chr9:20568247_20599410_-(Tnfrsf21);	rno04060
rno04062	Chemokine signaling pathway	Organismal Systems	Immune system	6	201	98	2681	0.756901	0.985586	0.816631	circRNA_4375|Chr3:128863086_128865813_+(Plcb4);circRNA_4376|Chr3:128908691_128911559_+(Plcb4);circRNA_4703|Chr4:67449579_67455064_-(Braf);circRNA_5467|Chr5:172936581_172957859_+(Gnb1);circRNA_5468|Chr5:172936581_172965700_+(Gnb1);circRNA_5496|Chr6:3150789_3165551_-(Sos1);	rno04062
rno04064	NF-kappa B signaling pathway	Environmental Information Processing	Signal transduction	1	201	30	2681	0.904744	0.988486	0.44461	circRNA_4405|Chr3:147736963_147740988_+(Csnk2a1);	rno04064
rno04066	HIF-1 signaling pathway	Environmental Information Processing	Signal transduction	3	201	51	2681	0.748929	0.985586	0.784606	circRNA_2564|Chr16:68958915_68959689_+(Eif4ebp1);circRNA_3794|Chr2:231056605_231078948_+(Camk2d);circRNA_5217|Chr5:113794314_113803150_+(Tek);	rno04066
rno04068	FoxO signaling pathway	Environmental Information Processing	Signal transduction	6	201	87	2681	0.646429	0.985586	0.919883	circRNA_0647|Chr1:251455609_251485480_+(Pten);circRNA_3057|Chr18:72593000_72595275_+(Smad2);circRNA_3568|Chr2:140592437_140597578_-(Setd7);circRNA_4703|Chr4:67449579_67455064_-(Braf);circRNA_5496|Chr6:3150789_3165551_-(Sos1);circRNA_6032|Chr7:60733754_60737965_-(Mdm2);	rno04068
rno04070	Phosphatidylinositol signaling system	Environmental Information Processing	Signal transduction	11	201	102	2681	0.138088	0.985586	1.43845	circRNA_0388|Chr1:185233419_185234547_+(Pik3c2a);circRNA_0647|Chr1:251455609_251485480_+(Pten);circRNA_0677|Chr1:257183839_257192683_+(Plce1);circRNA_0679|Chr1:257191149_257192683_+(Plce1);circRNA_1955|Chr14:9421418_9440942_-(Cds1);circRNA_2073|Chr14:60581951_60586776_-(Pi4k2b);circRNA_2831|Chr18:301858_306376_-(Mtmr1);circRNA_4375|Chr3:128863086_128865813_+(Plcb4);circRNA_4376|Chr3:128908691_128…	rno04070
rno04071	Sphingolipid signaling pathway	Environmental Information Processing	Signal transduction	10	201	88	2681	0.119066	0.985586	1.51572	circRNA_0032|Chr1:15474913_15494771_+(Map3k5);circRNA_0035|Chr1:15488392_15526167_+(Map3k5);circRNA_0038|Chr1:15545013_15551204_+(Map3k5);circRNA_0589|Chr1:233561451_233581182_+(Gnaq);circRNA_0591|Chr1:233578229_233581182_+(Gnaq);circRNA_0647|Chr1:251455609_251485480_+(Pten);circRNA_3513|Chr2:113739689_113747247_+(Pld1);circRNA_3516|Chr2:113788385_113806098_+(Pld1);circRNA_4375|Chr3:128863086_128…	rno04071
rno04072	Phospholipase D signaling pathway	Environmental Information Processing	Signal transduction	5	201	89	2681	0.81041	0.985586	0.749343	circRNA_3513|Chr2:113739689_113747247_+(Pld1);circRNA_3516|Chr2:113788385_113806098_+(Pld1);circRNA_4375|Chr3:128863086_128865813_+(Plcb4);circRNA_4376|Chr3:128908691_128911559_+(Plcb4);circRNA_5496|Chr6:3150789_3165551_-(Sos1);	rno04072
rno04110	Cell cycle	Cellular Processes	Cell growth and death	4	201	72	2681	0.801267	0.985586	0.741017	circRNA_1480|Chr11:89316354_89332868_-(Prkdc);circRNA_3057|Chr18:72593000_72595275_+(Smad2);circRNA_4535|Chr4:9164919_9178179_+(Orc5);circRNA_6032|Chr7:60733754_60737965_-(Mdm2);	rno04110
rno04114	Oocyte meiosis	Cellular Processes	Cell growth and death	4	201	70	2681	0.782813	0.985586	0.762189	circRNA_0664|Chr1:255727112_255774681_-(Cpeb3);circRNA_2339|Chr15:51936366_51954838_-(Ppp3cc);circRNA_3794|Chr2:231056605_231078948_+(Camk2d);circRNA_3821|Chr2:242041489_242041689_+(Ppp3ca);	rno04114
rno04115	p53 signaling pathway	Cellular Processes	Cell growth and death	3	201	19	2681	0.166125	0.985586	2.10605	circRNA_0647|Chr1:251455609_251485480_+(Pten);circRNA_1813|Chr13:76979427_77035818_+(Rfwd2);circRNA_6032|Chr7:60733754_60737965_-(Mdm2);	rno04115
rno04120	Ubiquitin mediated proteolysis	Genetic Information Processing	Folding, sorting and degradation	7	201	120	2681	0.80966	0.985586	0.778068	circRNA_1813|Chr13:76979427_77035818_+(Rfwd2);circRNA_3005|Chr18:60572935_60578301_+(Nedd4l);circRNA_3216|Chr19:39543248_39545672_+(Wwp2);circRNA_3621|Chr2:184309074_184309661_-(Fbxw7);circRNA_3958|Chr20:26818517_26823720_+(Herc4);circRNA_6032|Chr7:60733754_60737965_-(Mdm2);circRNA_6435|Chr8:67808880_67812158_-(Pias1);	rno04120
rno04137	Mitophagy - animal	Cellular Processes	Transport and catabolism	4	201	33	2681	0.23151	0.985586	1.61676	circRNA_2770|Chr17:77176705_77178100_+(Optn);circRNA_4336|Chr3:119184942_119187183_+(Usp8);circRNA_4405|Chr3:147736963_147740988_+(Csnk2a1);circRNA_6053|Chr7:66611086_66646540_+(Usp15);	rno04137
rno04140	Autophagy - animal	Cellular Processes	Transport and catabolism	2	201	77	2681	0.983166	0.994955	0.34645	circRNA_0319|Chr1:164046102_164055455_-(Uvrag);circRNA_0647|Chr1:251455609_251485480_+(Pten);	rno04140
rno04141	Protein processing in endoplasmic reticulum	Genetic Information Processing	Folding, sorting and degradation	7	201	86	2681	0.468938	0.985586	1.08568	circRNA_0032|Chr1:15474913_15494771_+(Map3k5);circRNA_0035|Chr1:15488392_15526167_+(Map3k5);circRNA_0038|Chr1:15545013_15551204_+(Map3k5);circRNA_0556|Chr1:221347566_221349792_-(Capn1);circRNA_0913|Chr10:37166067_37178344_-(Sec24a);circRNA_3706|Chr2:202970800_202998292_-(Man1a2);circRNA_5709|Chr6:80085774_80092480_-(Sec23a);	rno04141
rno04142	Lysosome	Cellular Processes	Transport and catabolism	2	201	50	2681	0.899558	0.988486	0.533532	circRNA_3332|Chr2:24067948_24083767_+(Ap3b1);circRNA_3335|Chr2:24125860_24161334_+(Ap3b1);	rno04142
rno04144	Endocytosis	Cellular Processes	Transport and catabolism	18	201	193	2681	0.192247	0.985586	1.24399	circRNA_0449|Chr1:200648164_200671090_-(Fgfr2);circRNA_0504|Chr1:214562895_214605872_+(Ap2a2);circRNA_1693|Chr13:26826515_26846460_-(Vps4b);circRNA_2066|Chr14:48873174_48891769_+(Arap2);circRNA_3005|Chr18:60572935_60578301_+(Nedd4l);circRNA_3057|Chr18:72593000_72595275_+(Smad2);circRNA_3513|Chr2:113739689_113747247_+(Pld1);circRNA_3516|Chr2:113788385_113806098_+(Pld1);circRNA_4336|Chr3:119184942_…	rno04144
rno04145	Phagosome	Cellular Processes	Transport and catabolism	4	201	61	2681	0.682949	0.985586	0.874643	circRNA_1547|Chr12:13717791_13718009_-(Actb);circRNA_5983|Chr7:37119218_37131623_+(Eea1);circRNA_6917|Chr9:71915420_71927987_+(Pikfyve);circRNA_6922|Chr9:71954951_71960153_+(Pikfyve);	rno04145
rno04146	Peroxisome	Cellular Processes	Transport and catabolism	3	201	22	2681	0.225203	0.985586	1.81886	circRNA_0163|Chr1:87010380_87010777_+(Ech1);circRNA_3777|Chr2:225359048_225372948_-(Abcd3);circRNA_4198|Chr3:62696762_62733674_+(Agps);	rno04146
rno04150	mTOR signaling pathway	Environmental Information Processing	Signal transduction	7	201	89	2681	0.50614	0.985586	1.04908	circRNA_0647|Chr1:251455609_251485480_+(Pten);circRNA_2564|Chr16:68958915_68959689_+(Eif4ebp1);circRNA_3417|Chr2:44554761_44564131_+(Slc38a9);circRNA_3607|Chr2:178246797_178249289_-(Fnip2);circRNA_4085|Chr3:13510410_13602354_+(Mapkap1);circRNA_4703|Chr4:67449579_67455064_-(Braf);circRNA_5496|Chr6:3150789_3165551_-(Sos1);	rno04150
rno04151	PI3K-Akt signaling pathway	Environmental Information Processing	Signal transduction	10	201	161	2681	0.78207	0.985586	0.828466	circRNA_0449|Chr1:200648164_200671090_-(Fgfr2);circRNA_0647|Chr1:251455609_251485480_+(Pten);circRNA_2564|Chr16:68958915_68959689_+(Eif4ebp1);circRNA_3425|Chr2:47139938_47146434_-(Itga1);circRNA_5217|Chr5:113794314_113803150_+(Tek);circRNA_5467|Chr5:172936581_172957859_+(Gnb1);circRNA_5468|Chr5:172936581_172965700_+(Gnb1);circRNA_5496|Chr6:3150789_3165551_-(Sos1);circRNA_5919|Chr7:3368026_3372361…	rno04151
rno04152	AMPK signaling pathway	Environmental Information Processing	Signal transduction	3	201	63	2681	0.863458	0.985586	0.635158	circRNA_2564|Chr16:68958915_68959689_+(Eif4ebp1);circRNA_4845|Chr4:147295666_147361944_+(Pparg);circRNA_4846|Chr4:147295666_147372423_+(Pparg);	rno04152
rno04210	Apoptosis	Cellular Processes	Cell growth and death	6	201	62	2681	0.319161	0.985586	1.2908	circRNA_0032|Chr1:15474913_15494771_+(Map3k5);circRNA_0035|Chr1:15488392_15526167_+(Map3k5);circRNA_0038|Chr1:15545013_15551204_+(Map3k5);circRNA_0556|Chr1:221347566_221349792_-(Capn1);circRNA_1547|Chr12:13717791_13718009_-(Actb);circRNA_1952|Chr14:7796209_7810203_-(Ptpn13);	rno04210
rno04211	Longevity regulating pathway - mammal	Organismal Systems	Aging	3	201	64	2681	0.870544	0.985586	0.625233	circRNA_2564|Chr16:68958915_68959689_+(Eif4ebp1);circRNA_4845|Chr4:147295666_147361944_+(Pparg);circRNA_4846|Chr4:147295666_147372423_+(Pparg);	rno04211
rno04217	Necroptosis	Cellular Processes	Cell growth and death	7	201	44	2681	0.0426196	0.985586	2.122	circRNA_0556|Chr1:221347566_221349792_-(Capn1);circRNA_1693|Chr13:26826515_26846460_-(Vps4b);circRNA_3794|Chr2:231056605_231078948_+(Camk2d);circRNA_4337|Chr3:119264196_119265879_-(Trpm7);circRNA_4760|Chr4:99489315_99494425_+(Chmp3);circRNA_5289|Chr5:129413066_129457884_+(Faf1);circRNA_5291|Chr5:129413066_129491380_+(Faf1);	rno04217
rno04218	Cellular senescence	Cellular Processes	Cell growth and death	11	201	111	2681	0.206087	0.985586	1.32181	circRNA_0556|Chr1:221347566_221349792_-(Capn1);circRNA_0647|Chr1:251455609_251485480_+(Pten);circRNA_1959|Chr14:10786399_10794860_+(Lin54);circRNA_2339|Chr15:51936366_51954838_-(Ppp3cc);circRNA_2564|Chr16:68958915_68959689_+(Eif4ebp1);circRNA_3057|Chr18:72593000_72595275_+(Smad2);circRNA_3203|Chr19:38057557_38062193_+(Nfatc3);circRNA_3821|Chr2:242041489_242041689_+(Ppp3ca);circRNA_4337|Chr3:11926…	rno04218
rno04260	Cardiac muscle contraction	Organismal Systems	Circulatory system	2	201	39	2681	0.802983	0.985586	0.684016	circRNA_4552|Chr4:15748953_15780820_-(Cacna2d1);circRNA_4554|Chr4:15760711_15780820_-(Cacna2d1);	rno04260
rno04261	Adrenergic signaling in cardiomyocytes	Organismal Systems	Circulatory system	9	201	102	2681	0.355096	0.985586	1.17691	circRNA_0589|Chr1:233561451_233581182_+(Gnaq);circRNA_0591|Chr1:233578229_233581182_+(Gnaq);circRNA_3794|Chr2:231056605_231078948_+(Camk2d);circRNA_4375|Chr3:128863086_128865813_+(Plcb4);circRNA_4376|Chr3:128908691_128911559_+(Plcb4);circRNA_4552|Chr4:15748953_15780820_-(Cacna2d1);circRNA_4554|Chr4:15760711_15780820_-(Cacna2d1);circRNA_5804|Chr6:124625936_124652103_-(Rps6ka5);circRNA_5986|Chr7:41…	rno04261
rno04270	Vascular smooth muscle contraction	Organismal Systems	Circulatory system	11	201	132	2681	0.402793	0.985586	1.11153	circRNA_0589|Chr1:233561451_233581182_+(Gnaq);circRNA_0591|Chr1:233578229_233581182_+(Gnaq);circRNA_0807|Chr10:841855_843446_+(Myh11);circRNA_4375|Chr3:128863086_128865813_+(Plcb4);circRNA_4376|Chr3:128908691_128911559_+(Plcb4);circRNA_4703|Chr4:67449579_67455064_-(Braf);circRNA_4776|Chr4:115221467_115224878_-(Actg2);circRNA_5079|Chr5:59143243_59144331_+(Npr2);circRNA_6004|Chr7:51453247_51479896_…	rno04270
rno04310	Wnt signaling pathway	Environmental Information Processing	Signal transduction	8	201	88	2681	0.337884	0.985586	1.21257	circRNA_2339|Chr15:51936366_51954838_-(Ppp3cc);circRNA_3203|Chr19:38057557_38062193_+(Nfatc3);circRNA_3709|Chr2:204602015_204607697_-(Vangl1);circRNA_3794|Chr2:231056605_231078948_+(Camk2d);circRNA_3821|Chr2:242041489_242041689_+(Ppp3ca);circRNA_4375|Chr3:128863086_128865813_+(Plcb4);circRNA_4376|Chr3:128908691_128911559_+(Plcb4);circRNA_4405|Chr3:147736963_147740988_+(Csnk2a1);	rno04310
rno04340	Hedgehog signaling pathway	Environmental Information Processing	Signal transduction	1	201	25	2681	0.858776	0.985586	0.533532	circRNA_2606|Chr17:1059417_1065593_-(Ptch1);	rno04340
rno04350	TGF-beta signaling pathway	Environmental Information Processing	Signal transduction	2	201	62	2681	0.953723	0.994955	0.430268	circRNA_3057|Chr18:72593000_72595275_+(Smad2);circRNA_4478|Chr3:170905824_170929765_-(Bmp7);	rno04350
rno04360	Axon guidance	Organismal Systems	Development and regeneration	12	201	115	2681	0.148819	0.985586	1.39182	circRNA_1878|Chr13:100347405_100353039_-(Enah);circRNA_2339|Chr15:51936366_51954838_-(Ppp3cc);circRNA_2606|Chr17:1059417_1065593_-(Ptch1);circRNA_3203|Chr19:38057557_38062193_+(Nfatc3);circRNA_3794|Chr2:231056605_231078948_+(Camk2d);circRNA_3821|Chr2:242041489_242041689_+(Ppp3ca);circRNA_4478|Chr3:170905824_170929765_-(Bmp7);circRNA_6045|Chr7:64024698_64033477_-(Srgap1);circRNA_6046|Chr7:64125692…	rno04360
rno04370	VEGF signaling pathway	Environmental Information Processing	Signal transduction	2	201	60	2681	0.947217	0.994955	0.44461	circRNA_2339|Chr15:51936366_51954838_-(Ppp3cc);circRNA_3821|Chr2:242041489_242041689_+(Ppp3ca);	rno04370
rno04371	Apelin signaling pathway	Environmental Information Processing	Signal transduction	9	201	111	2681	0.45474	0.985586	1.08148	circRNA_0232|Chr1:128239552_128242835_-(Mef2a);circRNA_0233|Chr1:128239552_128243030_-(Mef2a);circRNA_0589|Chr1:233561451_233581182_+(Gnaq);circRNA_0591|Chr1:233578229_233581182_+(Gnaq);circRNA_3057|Chr18:72593000_72595275_+(Smad2);circRNA_4375|Chr3:128863086_128865813_+(Plcb4);circRNA_4376|Chr3:128908691_128911559_+(Plcb4);circRNA_5467|Chr5:172936581_172957859_+(Gnb1);circRNA_5468|Chr5:172936581…	rno04371
rno04380	Osteoclast differentiation	Organismal Systems	Development and regeneration	4	201	64	2681	0.719372	0.985586	0.833644	circRNA_2339|Chr15:51936366_51954838_-(Ppp3cc);circRNA_3821|Chr2:242041489_242041689_+(Ppp3ca);circRNA_4845|Chr4:147295666_147361944_+(Pparg);circRNA_4846|Chr4:147295666_147372423_+(Pparg);	rno04380
rno04390	Hippo signaling pathway	Environmental Information Processing	Signal transduction	7	201	84	2681	0.443782	0.985586	1.11153	circRNA_1427|Chr11:72245130_72264219_-(Dlg1);circRNA_1547|Chr12:13717791_13718009_-(Actb);circRNA_2927|Chr18:27956412_27984766_+(Ctnna1);circRNA_3057|Chr18:72593000_72595275_+(Smad2);circRNA_4478|Chr3:170905824_170929765_-(Bmp7);circRNA_5228|Chr5:117052259_117060839_+(Patj);circRNA_6273|Chr8:6150134_6161740_-(Yap1);	rno04390
rno04392	Hippo signaling pathway - multiple species	Environmental Information Processing	Signal transduction	1	201	26	2681	0.869464	0.985586	0.513012	circRNA_6273|Chr8:6150134_6161740_-(Yap1);	rno04392
rno04510	Focal adhesion	Cellular Processes	Cellular community - eukaryotes	12	201	192	2681	0.791704	0.985586	0.833644	circRNA_0493|Chr1:206956299_206969242_+(Dock1);circRNA_0647|Chr1:251455609_251485480_+(Pten);circRNA_1547|Chr12:13717791_13718009_-(Actb);circRNA_3425|Chr2:47139938_47146434_-(Itga1);circRNA_4703|Chr4:67449579_67455064_-(Braf);circRNA_5496|Chr6:3150789_3165551_-(Sos1);circRNA_5919|Chr7:3368026_3372361_+(Itga7);circRNA_6004|Chr7:51453247_51479896_-(Ppp1r12a);circRNA_6005|Chr7:51465047_51479896_-(P…	rno04510
rno04512	ECM-receptor interaction	Environmental Information Processing	Signaling molecules and interaction	2	201	70	2681	0.972877	0.994955	0.381095	circRNA_3425|Chr2:47139938_47146434_-(Itga1);circRNA_5919|Chr7:3368026_3372361_+(Itga7);	rno04512
rno04514	Cell adhesion molecules (CAMs)	Environmental Information Processing	Signaling molecules and interaction	1	201	51	2681	0.981931	0.994955	0.261535	circRNA_3372|Chr2:30559682_30566431_-(Ocln);	rno04514
rno04520	Adherens junction	Cellular Processes	Cellular community - eukaryotes	8	201	112	2681	0.612017	0.985586	0.952736	circRNA_0220|Chr1:126149975_126164946_-(Tjp1);circRNA_0688|Chr1:259396273_259409897_-(Sorbs1);circRNA_0698|Chr1:259421033_259450845_-(Sorbs1);circRNA_0701|Chr1:259434763_259459540_-(Sorbs1);circRNA_1547|Chr12:13717791_13718009_-(Actb);circRNA_2927|Chr18:27956412_27984766_+(Ctnna1);circRNA_3057|Chr18:72593000_72595275_+(Smad2);circRNA_4405|Chr3:147736963_147740988_+(Csnk2a1);	rno04520
rno04530	Tight junction	Cellular Processes	Cellular community - eukaryotes	13	201	118	2681	0.0999289	0.985586	1.46947	circRNA_0032|Chr1:15474913_15494771_+(Map3k5);circRNA_0035|Chr1:15488392_15526167_+(Map3k5);circRNA_0038|Chr1:15545013_15551204_+(Map3k5);circRNA_0220|Chr1:126149975_126164946_-(Tjp1);circRNA_0607|Chr1:241963278_241964424_-(Tjp2);circRNA_0807|Chr10:841855_843446_+(Myh11);circRNA_1427|Chr11:72245130_72264219_-(Dlg1);circRNA_1497|Chr12:1975318_1979802_+(Arhgef18);circRNA_1547|Chr12:13717791_1371800…	rno04530
rno04540	Gap junction	Cellular Processes	Cellular community - eukaryotes	6	201	65	2681	0.360364	0.985586	1.23123	circRNA_0220|Chr1:126149975_126164946_-(Tjp1);circRNA_0589|Chr1:233561451_233581182_+(Gnaq);circRNA_0591|Chr1:233578229_233581182_+(Gnaq);circRNA_4375|Chr3:128863086_128865813_+(Plcb4);circRNA_4376|Chr3:128908691_128911559_+(Plcb4);circRNA_5496|Chr6:3150789_3165551_-(Sos1);	rno04540
rno04550	Signaling pathways regulating pluripotency of stem cells	Cellular Processes	Cellular community - eukaryotes	4	201	60	2681	0.670104	0.985586	0.889221	circRNA_0449|Chr1:200648164_200671090_-(Fgfr2);circRNA_3057|Chr18:72593000_72595275_+(Smad2);circRNA_3224|Chr19:42911935_42920390_-(Zfhx3);circRNA_4741|Chr4:95892497_95912787_+(Smarcad1);	rno04550
rno04611	Platelet activation	Organismal Systems	Immune system	9	201	122	2681	0.57269	0.985586	0.983974	circRNA_0589|Chr1:233561451_233581182_+(Gnaq);circRNA_0591|Chr1:233578229_233581182_+(Gnaq);circRNA_1547|Chr12:13717791_13718009_-(Actb);circRNA_4375|Chr3:128863086_128865813_+(Plcb4);circRNA_4376|Chr3:128908691_128911559_+(Plcb4);circRNA_6004|Chr7:51453247_51479896_-(Ppp1r12a);circRNA_6005|Chr7:51465047_51479896_-(Ppp1r12a);circRNA_6343|Chr8:47303909_47306590_-(Arhgef12);circRNA_7047|Chr9:119309…	rno04611
rno04621	NOD-like receptor signaling pathway	Organismal Systems	Immune system	5	201	64	2681	0.53075	0.985586	1.04206	circRNA_4337|Chr3:119264196_119265879_-(Trpm7);circRNA_4375|Chr3:128863086_128865813_+(Plcb4);circRNA_4376|Chr3:128908691_128911559_+(Plcb4);circRNA_4804|Chr4:119077003_119083375_-(Antxr1);circRNA_5042|Chr5:29851601_29865341_-(Ripk2);	rno04621
rno04625	C-type lectin receptor signaling pathway	Organismal Systems	Immune system	5	201	69	2681	0.599612	0.985586	0.966544	circRNA_2339|Chr15:51936366_51954838_-(Ppp3cc);circRNA_3203|Chr19:38057557_38062193_+(Nfatc3);circRNA_3821|Chr2:242041489_242041689_+(Ppp3ca);circRNA_6032|Chr7:60733754_60737965_-(Mdm2);circRNA_6343|Chr8:47303909_47306590_-(Arhgef12);	rno04625
rno04630	Jak-STAT signaling pathway	Environmental Information Processing	Signal transduction	2	201	52	2681	0.911503	0.989492	0.513012	circRNA_5496|Chr6:3150789_3165551_-(Sos1);circRNA_6435|Chr8:67808880_67812158_-(Pias1);	rno04630
rno04640	Hematopoietic cell lineage	Organismal Systems	Immune system	1	201	18	2681	0.755223	0.985586	0.741017	circRNA_3425|Chr2:47139938_47146434_-(Itga1);	rno04640
rno04650	Natural killer cell mediated cytotoxicity	Organismal Systems	Immune system	4	201	60	2681	0.670104	0.985586	0.889221	circRNA_2339|Chr15:51936366_51954838_-(Ppp3cc);circRNA_3821|Chr2:242041489_242041689_+(Ppp3ca);circRNA_4703|Chr4:67449579_67455064_-(Braf);circRNA_5496|Chr6:3150789_3165551_-(Sos1);	rno04650
rno04657	IL-17 signaling pathway	Organismal Systems	Immune system	1	201	24	2681	0.847218	0.985586	0.555763	circRNA_6532|Chr8:82334237_82340165_-(Mapk6);	rno04657
rno04658	Th1 and Th2 cell differentiation	Organismal Systems	Immune system	3	201	43	2681	0.636908	0.985586	0.93058	circRNA_2339|Chr15:51936366_51954838_-(Ppp3cc);circRNA_3203|Chr19:38057557_38062193_+(Nfatc3);circRNA_3821|Chr2:242041489_242041689_+(Ppp3ca);	rno04658
rno04659	Th17 cell differentiation	Organismal Systems	Immune system	4	201	61	2681	0.682949	0.985586	0.874643	circRNA_2339|Chr15:51936366_51954838_-(Ppp3cc);circRNA_3057|Chr18:72593000_72595275_+(Smad2);circRNA_3203|Chr19:38057557_38062193_+(Nfatc3);circRNA_3821|Chr2:242041489_242041689_+(Ppp3ca);	rno04659
rno04660	T cell receptor signaling pathway	Organismal Systems	Immune system	7	201	80	2681	0.393035	0.985586	1.1671	circRNA_1427|Chr11:72245130_72264219_-(Dlg1);circRNA_2339|Chr15:51936366_51954838_-(Ppp3cc);circRNA_3203|Chr19:38057557_38062193_+(Nfatc3);circRNA_3821|Chr2:242041489_242041689_+(Ppp3ca);circRNA_5496|Chr6:3150789_3165551_-(Sos1);circRNA_7190|ChrX:114972099_114978572_+(Pak3);circRNA_7191|ChrX:114972099_114999004_+(Pak3);	rno04660
rno04662	B cell receptor signaling pathway	Organismal Systems	Immune system	4	201	58	2681	0.643369	0.985586	0.919883	circRNA_2339|Chr15:51936366_51954838_-(Ppp3cc);circRNA_3203|Chr19:38057557_38062193_+(Nfatc3);circRNA_3821|Chr2:242041489_242041689_+(Ppp3ca);circRNA_5496|Chr6:3150789_3165551_-(Sos1);	rno04662
rno04664	Fc epsilon RI signaling pathway	Organismal Systems	Immune system	1	201	40	2681	0.956764	0.994955	0.333458	circRNA_5496|Chr6:3150789_3165551_-(Sos1);	rno04664
rno04666	Fc gamma R-mediated phagocytosis	Organismal Systems	Immune system	2	201	51	2681	0.905706	0.988486	0.523071	circRNA_3513|Chr2:113739689_113747247_+(Pld1);circRNA_3516|Chr2:113788385_113806098_+(Pld1);	rno04666
rno04668	TNF signaling pathway	Environmental Information Processing	Signal transduction	4	201	65	2681	0.730809	0.985586	0.820819	circRNA_0032|Chr1:15474913_15494771_+(Map3k5);circRNA_0035|Chr1:15488392_15526167_+(Map3k5);circRNA_0038|Chr1:15545013_15551204_+(Map3k5);circRNA_5804|Chr6:124625936_124652103_-(Rps6ka5);	rno04668
rno04670	Leukocyte transendothelial migration	Organismal Systems	Immune system	4	201	63	2681	0.707583	0.985586	0.846877	circRNA_1547|Chr12:13717791_13718009_-(Actb);circRNA_2927|Chr18:27956412_27984766_+(Ctnna1);circRNA_3372|Chr2:30559682_30566431_-(Ocln);circRNA_7047|Chr9:119309035_119311107_-(Myl12b);	rno04670
rno04713	Circadian entrainment	Organismal Systems	Environmental adaptation	8	201	77	2681	0.216321	0.985586	1.3858	circRNA_0589|Chr1:233561451_233581182_+(Gnaq);circRNA_0591|Chr1:233578229_233581182_+(Gnaq);circRNA_3794|Chr2:231056605_231078948_+(Camk2d);circRNA_4375|Chr3:128863086_128865813_+(Plcb4);circRNA_4376|Chr3:128908691_128911559_+(Plcb4);circRNA_5467|Chr5:172936581_172957859_+(Gnb1);circRNA_5468|Chr5:172936581_172965700_+(Gnb1);circRNA_5804|Chr6:124625936_124652103_-(Rps6ka5);	rno04713
rno04714	Thermogenesis	Organismal Systems	Environmental adaptation	9	201	74	2681	0.0984044	0.985586	1.62223	circRNA_0032|Chr1:15474913_15494771_+(Map3k5);circRNA_0035|Chr1:15488392_15526167_+(Map3k5);circRNA_0038|Chr1:15545013_15551204_+(Map3k5);circRNA_1547|Chr12:13717791_13718009_-(Actb);circRNA_3087|Chr18:79813606_79815529_+(Zfp516);circRNA_4845|Chr4:147295666_147361944_+(Pparg);circRNA_4846|Chr4:147295666_147372423_+(Pparg);circRNA_5496|Chr6:3150789_3165551_-(Sos1);circRNA_5918|Chr7:2888642_2889413…	rno04714
rno04720	Long-term potentiation	Organismal Systems	Nervous system	8	201	77	2681	0.216321	0.985586	1.3858	circRNA_0589|Chr1:233561451_233581182_+(Gnaq);circRNA_0591|Chr1:233578229_233581182_+(Gnaq);circRNA_2339|Chr15:51936366_51954838_-(Ppp3cc);circRNA_3794|Chr2:231056605_231078948_+(Camk2d);circRNA_3821|Chr2:242041489_242041689_+(Ppp3ca);circRNA_4375|Chr3:128863086_128865813_+(Plcb4);circRNA_4376|Chr3:128908691_128911559_+(Plcb4);circRNA_4703|Chr4:67449579_67455064_-(Braf);	rno04720
rno04721	Synaptic vesicle cycle	Organismal Systems	Nervous system	1	201	27	2681	0.879346	0.985586	0.494011	circRNA_0504|Chr1:214562895_214605872_+(Ap2a2);	rno04721
rno04722	Neurotrophin signaling pathway	Organismal Systems	Nervous system	11	201	90	2681	0.0701504	0.985586	1.63024	circRNA_0032|Chr1:15474913_15494771_+(Map3k5);circRNA_0035|Chr1:15488392_15526167_+(Map3k5);circRNA_0038|Chr1:15545013_15551204_+(Map3k5);circRNA_1215|Chr10:94307816_94320863_+(Map3k3);circRNA_1266|Chr10:109754888_109755050_+(Arhgdia);circRNA_3794|Chr2:231056605_231078948_+(Camk2d);circRNA_4703|Chr4:67449579_67455064_-(Braf);circRNA_5042|Chr5:29851601_29865341_-(Ripk2);circRNA_5496|Chr6:3150789_3…	rno04722
rno04723	Retrograde endocannabinoid signaling	Organismal Systems	Nervous system	6	201	54	2681	0.214735	0.985586	1.48203	circRNA_0589|Chr1:233561451_233581182_+(Gnaq);circRNA_0591|Chr1:233578229_233581182_+(Gnaq);circRNA_4375|Chr3:128863086_128865813_+(Plcb4);circRNA_4376|Chr3:128908691_128911559_+(Plcb4);circRNA_5467|Chr5:172936581_172957859_+(Gnb1);circRNA_5468|Chr5:172936581_172965700_+(Gnb1);	rno04723
rno04724	Glutamatergic synapse	Organismal Systems	Nervous system	11	201	77	2681	0.026388	0.985586	1.90547	circRNA_0589|Chr1:233561451_233581182_+(Gnaq);circRNA_0591|Chr1:233578229_233581182_+(Gnaq);circRNA_2339|Chr15:51936366_51954838_-(Ppp3cc);circRNA_3513|Chr2:113739689_113747247_+(Pld1);circRNA_3516|Chr2:113788385_113806098_+(Pld1);circRNA_3821|Chr2:242041489_242041689_+(Ppp3ca);circRNA_4375|Chr3:128863086_128865813_+(Plcb4);circRNA_4376|Chr3:128908691_128911559_+(Plcb4);circRNA_5467|Chr5:17293658…	rno04724
rno04725	Cholinergic synapse	Organismal Systems	Nervous system	7	201	61	2681	0.168682	0.985586	1.53063	circRNA_0589|Chr1:233561451_233581182_+(Gnaq);circRNA_0591|Chr1:233578229_233581182_+(Gnaq);circRNA_3794|Chr2:231056605_231078948_+(Camk2d);circRNA_4375|Chr3:128863086_128865813_+(Plcb4);circRNA_4376|Chr3:128908691_128911559_+(Plcb4);circRNA_5467|Chr5:172936581_172957859_+(Gnb1);circRNA_5468|Chr5:172936581_172965700_+(Gnb1);	rno04725
rno04726	Serotonergic synapse	Organismal Systems	Nervous system	7	201	59	2681	0.149116	0.985586	1.58251	circRNA_0589|Chr1:233561451_233581182_+(Gnaq);circRNA_0591|Chr1:233578229_233581182_+(Gnaq);circRNA_4375|Chr3:128863086_128865813_+(Plcb4);circRNA_4376|Chr3:128908691_128911559_+(Plcb4);circRNA_4703|Chr4:67449579_67455064_-(Braf);circRNA_5467|Chr5:172936581_172957859_+(Gnb1);circRNA_5468|Chr5:172936581_172965700_+(Gnb1);	rno04726
rno04727	GABAergic synapse	Organismal Systems	Nervous system	2	201	35	2681	0.751151	0.985586	0.762189	circRNA_5467|Chr5:172936581_172957859_+(Gnb1);circRNA_5468|Chr5:172936581_172965700_+(Gnb1);	rno04727
rno04728	Dopaminergic synapse	Organismal Systems	Nervous system	9	201	85	2681	0.182827	0.985586	1.41229	circRNA_0589|Chr1:233561451_233581182_+(Gnaq);circRNA_0591|Chr1:233578229_233581182_+(Gnaq);circRNA_2339|Chr15:51936366_51954838_-(Ppp3cc);circRNA_3794|Chr2:231056605_231078948_+(Camk2d);circRNA_3821|Chr2:242041489_242041689_+(Ppp3ca);circRNA_4375|Chr3:128863086_128865813_+(Plcb4);circRNA_4376|Chr3:128908691_128911559_+(Plcb4);circRNA_5467|Chr5:172936581_172957859_+(Gnb1);circRNA_5468|Chr5:172936…	rno04728
rno04730	Long-term depression	Organismal Systems	Nervous system	5	201	48	2681	0.28929	0.985586	1.38941	circRNA_0589|Chr1:233561451_233581182_+(Gnaq);circRNA_0591|Chr1:233578229_233581182_+(Gnaq);circRNA_4375|Chr3:128863086_128865813_+(Plcb4);circRNA_4376|Chr3:128908691_128911559_+(Plcb4);circRNA_4703|Chr4:67449579_67455064_-(Braf);	rno04730
rno04740	Olfactory transduction	Organismal Systems	Sensory system	4	201	20	2681	0.0574502	0.985586	2.66766	circRNA_3794|Chr2:231056605_231078948_+(Camk2d);circRNA_5467|Chr5:172936581_172957859_+(Gnb1);circRNA_5468|Chr5:172936581_172965700_+(Gnb1);circRNA_6105|Chr7:76229137_76229533_-(Ncald);	rno04740
rno04750	Inflammatory mediator regulation of TRP channels	Organismal Systems	Sensory system	5	201	52	2681	0.350105	0.985586	1.28253	circRNA_0589|Chr1:233561451_233581182_+(Gnaq);circRNA_0591|Chr1:233578229_233581182_+(Gnaq);circRNA_3794|Chr2:231056605_231078948_+(Camk2d);circRNA_4375|Chr3:128863086_128865813_+(Plcb4);circRNA_4376|Chr3:128908691_128911559_+(Plcb4);	rno04750
rno04810	Regulation of actin cytoskeleton	Cellular Processes	Cell motility	19	201	174	2681	0.057573	0.985586	1.45648	circRNA_0449|Chr1:200648164_200671090_-(Fgfr2);circRNA_0493|Chr1:206956299_206969242_+(Dock1);circRNA_1547|Chr12:13717791_13718009_-(Actb);circRNA_1878|Chr13:100347405_100353039_-(Enah);circRNA_2378|Chr15:70098761_70139170_-(Diaph3);circRNA_3425|Chr2:47139938_47146434_-(Itga1);circRNA_4210|Chr3:67751613_67755221_-(Nckap1);circRNA_4703|Chr4:67449579_67455064_-(Braf);circRNA_5496|Chr6:3150789_31655…	rno04810
rno04910	Insulin signaling pathway	Organismal Systems	Endocrine system	8	201	100	2681	0.478994	0.985586	1.06706	circRNA_0688|Chr1:259396273_259409897_-(Sorbs1);circRNA_0698|Chr1:259421033_259450845_-(Sorbs1);circRNA_0701|Chr1:259434763_259459540_-(Sorbs1);circRNA_2564|Chr16:68958915_68959689_+(Eif4ebp1);circRNA_3124|Chr19:22103121_22128599_-(Phkb);circRNA_3129|Chr19:22143641_22179584_-(Phkb);circRNA_4703|Chr4:67449579_67455064_-(Braf);circRNA_5496|Chr6:3150789_3165551_-(Sos1);	rno04910
rno04911	Insulin secretion	Organismal Systems	Endocrine system	6	201	56	2681	0.23975	0.985586	1.4291	circRNA_0589|Chr1:233561451_233581182_+(Gnaq);circRNA_0591|Chr1:233578229_233581182_+(Gnaq);circRNA_3794|Chr2:231056605_231078948_+(Camk2d);circRNA_4375|Chr3:128863086_128865813_+(Plcb4);circRNA_4376|Chr3:128908691_128911559_+(Plcb4);circRNA_6110|Chr7:78170329_78189124_+(Rims2);	rno04911
rno04912	GnRH signaling pathway	Organismal Systems	Endocrine system	9	201	83	2681	0.165503	0.985586	1.44632	circRNA_0589|Chr1:233561451_233581182_+(Gnaq);circRNA_0591|Chr1:233578229_233581182_+(Gnaq);circRNA_1215|Chr10:94307816_94320863_+(Map3k3);circRNA_3513|Chr2:113739689_113747247_+(Pld1);circRNA_3516|Chr2:113788385_113806098_+(Pld1);circRNA_3794|Chr2:231056605_231078948_+(Camk2d);circRNA_4375|Chr3:128863086_128865813_+(Plcb4);circRNA_4376|Chr3:128908691_128911559_+(Plcb4);circRNA_5496|Chr6:3150789_…	rno04912
rno04914	Progesterone-mediated oocyte maturation	Organismal Systems	Endocrine system	2	201	59	2681	0.943648	0.994955	0.452146	circRNA_0664|Chr1:255727112_255774681_-(Cpeb3);circRNA_4703|Chr4:67449579_67455064_-(Braf);	rno04914
rno04915	Estrogen signaling pathway	Organismal Systems	Endocrine system	5	201	67	2681	0.572728	0.985586	0.995396	circRNA_0589|Chr1:233561451_233581182_+(Gnaq);circRNA_0591|Chr1:233578229_233581182_+(Gnaq);circRNA_4375|Chr3:128863086_128865813_+(Plcb4);circRNA_4376|Chr3:128908691_128911559_+(Plcb4);circRNA_5496|Chr6:3150789_3165551_-(Sos1);	rno04915
rno04916	Melanogenesis	Organismal Systems	Endocrine system	5	201	48	2681	0.28929	0.985586	1.38941	circRNA_0589|Chr1:233561451_233581182_+(Gnaq);circRNA_0591|Chr1:233578229_233581182_+(Gnaq);circRNA_3794|Chr2:231056605_231078948_+(Camk2d);circRNA_4375|Chr3:128863086_128865813_+(Plcb4);circRNA_4376|Chr3:128908691_128911559_+(Plcb4);	rno04916
rno04917	Prolactin signaling pathway	Organismal Systems	Endocrine system	1	201	33	2681	0.924817	0.994955	0.404191	circRNA_5496|Chr6:3150789_3165551_-(Sos1);	rno04917
rno04918	Thyroid hormone synthesis	Organismal Systems	Endocrine system	4	201	46	2681	0.456764	0.985586	1.15985	circRNA_0589|Chr1:233561451_233581182_+(Gnaq);circRNA_0591|Chr1:233578229_233581182_+(Gnaq);circRNA_4375|Chr3:128863086_128865813_+(Plcb4);circRNA_4376|Chr3:128908691_128911559_+(Plcb4);	rno04918
rno04919	Thyroid hormone signaling pathway	Organismal Systems	Endocrine system	6	201	88	2681	0.657595	0.985586	0.90943	circRNA_0677|Chr1:257183839_257192683_+(Plce1);circRNA_0679|Chr1:257191149_257192683_+(Plce1);circRNA_1547|Chr12:13717791_13718009_-(Actb);circRNA_4375|Chr3:128863086_128865813_+(Plcb4);circRNA_4376|Chr3:128908691_128911559_+(Plcb4);circRNA_6032|Chr7:60733754_60737965_-(Mdm2);	rno04919
rno04920	Adipocytokine signaling pathway	Organismal Systems	Endocrine system	2	201	30	2681	0.670394	0.985586	0.889221	circRNA_6203|Chr7:126667194_126669197_+(Ppara);circRNA_6204|Chr7:126667194_126671241_+(Ppara);	rno04920
rno04921	Oxytocin signaling pathway	Organismal Systems	Endocrine system	14	201	140	2681	0.160232	0.985586	1.33383	circRNA_0589|Chr1:233561451_233581182_+(Gnaq);circRNA_0591|Chr1:233578229_233581182_+(Gnaq);circRNA_1547|Chr12:13717791_13718009_-(Actb);circRNA_2339|Chr15:51936366_51954838_-(Ppp3cc);circRNA_3203|Chr19:38057557_38062193_+(Nfatc3);circRNA_3794|Chr2:231056605_231078948_+(Camk2d);circRNA_3821|Chr2:242041489_242041689_+(Ppp3ca);circRNA_4375|Chr3:128863086_128865813_+(Plcb4);circRNA_4376|Chr3:1289086…	rno04921
rno04922	Glucagon signaling pathway	Organismal Systems	Endocrine system	12	201	88	2681	0.0290246	0.985586	1.81886	circRNA_0589|Chr1:233561451_233581182_+(Gnaq);circRNA_0591|Chr1:233578229_233581182_+(Gnaq);circRNA_0722|Chr1:261165387_261165588_-(Pgam1);circRNA_2339|Chr15:51936366_51954838_-(Ppp3cc);circRNA_3124|Chr19:22103121_22128599_-(Phkb);circRNA_3129|Chr19:22143641_22179584_-(Phkb);circRNA_3794|Chr2:231056605_231078948_+(Camk2d);circRNA_3821|Chr2:242041489_242041689_+(Ppp3ca);circRNA_4375|Chr3:128863086…	rno04922
rno04924	Renin secretion	Organismal Systems	Endocrine system	6	201	65	2681	0.360364	0.985586	1.23123	circRNA_0589|Chr1:233561451_233581182_+(Gnaq);circRNA_0591|Chr1:233578229_233581182_+(Gnaq);circRNA_2339|Chr15:51936366_51954838_-(Ppp3cc);circRNA_3821|Chr2:242041489_242041689_+(Ppp3ca);circRNA_4375|Chr3:128863086_128865813_+(Plcb4);circRNA_4376|Chr3:128908691_128911559_+(Plcb4);	rno04924
rno04925	Aldosterone synthesis and secretion	Organismal Systems	Endocrine system	6	201	62	2681	0.319161	0.985586	1.2908	circRNA_0589|Chr1:233561451_233581182_+(Gnaq);circRNA_0591|Chr1:233578229_233581182_+(Gnaq);circRNA_3794|Chr2:231056605_231078948_+(Camk2d);circRNA_4375|Chr3:128863086_128865813_+(Plcb4);circRNA_4376|Chr3:128908691_128911559_+(Plcb4);circRNA_5986|Chr7:41167312_41167751_+(Atp2b1);	rno04925
rno04926	Relaxin signaling pathway	Organismal Systems	Endocrine system	6	201	104	2681	0.805524	0.985586	0.769518	circRNA_3057|Chr18:72593000_72595275_+(Smad2);circRNA_4375|Chr3:128863086_128865813_+(Plcb4);circRNA_4376|Chr3:128908691_128911559_+(Plcb4);circRNA_5467|Chr5:172936581_172957859_+(Gnb1);circRNA_5468|Chr5:172936581_172965700_+(Gnb1);circRNA_5496|Chr6:3150789_3165551_-(Sos1);	rno04926
rno04927	Cortisol synthesis and secretion	Organismal Systems	Endocrine system	4	201	49	2681	0.507044	0.985586	1.08884	circRNA_0589|Chr1:233561451_233581182_+(Gnaq);circRNA_0591|Chr1:233578229_233581182_+(Gnaq);circRNA_4375|Chr3:128863086_128865813_+(Plcb4);circRNA_4376|Chr3:128908691_128911559_+(Plcb4);	rno04927
rno04931	Insulin resistance	Human Diseases	Endocrine and metabolic disease	3	201	51	2681	0.748929	0.985586	0.784606	circRNA_0647|Chr1:251455609_251485480_+(Pten);circRNA_6203|Chr7:126667194_126669197_+(Ppara);circRNA_6204|Chr7:126667194_126671241_+(Ppara);	rno04931
rno04932	Non-alcoholic fatty liver disease (NAFLD)	Human Diseases	Endocrine and metabolic disease	5	201	59	2681	0.457185	0.985586	1.13037	circRNA_0032|Chr1:15474913_15494771_+(Map3k5);circRNA_0035|Chr1:15488392_15526167_+(Map3k5);circRNA_0038|Chr1:15545013_15551204_+(Map3k5);circRNA_6203|Chr7:126667194_126669197_+(Ppara);circRNA_6204|Chr7:126667194_126671241_+(Ppara);	rno04932
rno04933	AGE-RAGE signaling pathway in diabetic complications	Human Diseases	Endocrine and metabolic disease	5	201	94	2681	0.846506	0.985586	0.709484	circRNA_0677|Chr1:257183839_257192683_+(Plce1);circRNA_0679|Chr1:257191149_257192683_+(Plce1);circRNA_3057|Chr18:72593000_72595275_+(Smad2);circRNA_4375|Chr3:128863086_128865813_+(Plcb4);circRNA_4376|Chr3:128908691_128911559_+(Plcb4);	rno04933
rno04934	Cushing's syndrome	Human Diseases	Endocrine and metabolic disease	7	201	79	2681	0.380329	0.985586	1.18188	circRNA_0589|Chr1:233561451_233581182_+(Gnaq);circRNA_0591|Chr1:233578229_233581182_+(Gnaq);circRNA_3794|Chr2:231056605_231078948_+(Camk2d);circRNA_4336|Chr3:119184942_119187183_+(Usp8);circRNA_4375|Chr3:128863086_128865813_+(Plcb4);circRNA_4376|Chr3:128908691_128911559_+(Plcb4);circRNA_4703|Chr4:67449579_67455064_-(Braf);	rno04934
rno04960	Aldosterone-regulated sodium reabsorption	Organismal Systems	Excretory system	1	201	23	2681	0.83472	0.985586	0.579926	circRNA_3005|Chr18:60572935_60578301_+(Nedd4l);	rno04960
rno04961	Endocrine and other factor-regulated calcium reabsorption	Organismal Systems	Excretory system	6	201	39	2681	0.0672323	0.985586	2.05205	circRNA_0504|Chr1:214562895_214605872_+(Ap2a2);circRNA_0589|Chr1:233561451_233581182_+(Gnaq);circRNA_0591|Chr1:233578229_233581182_+(Gnaq);circRNA_4375|Chr3:128863086_128865813_+(Plcb4);circRNA_4376|Chr3:128908691_128911559_+(Plcb4);circRNA_5986|Chr7:41167312_41167751_+(Atp2b1);	rno04961
rno04962	Vasopressin-regulated water reabsorption	Organismal Systems	Excretory system	1	201	13	2681	0.637769	0.985586	1.02602	circRNA_1266|Chr10:109754888_109755050_+(Arhgdia);	rno04962
rno04970	Salivary secretion	Organismal Systems	Digestive system	5	201	67	2681	0.572728	0.985586	0.995396	circRNA_0589|Chr1:233561451_233581182_+(Gnaq);circRNA_0591|Chr1:233578229_233581182_+(Gnaq);circRNA_4375|Chr3:128863086_128865813_+(Plcb4);circRNA_4376|Chr3:128908691_128911559_+(Plcb4);circRNA_5986|Chr7:41167312_41167751_+(Atp2b1);	rno04970
rno04971	Gastric acid secretion	Organismal Systems	Digestive system	6	201	49	2681	0.156813	0.985586	1.63326	circRNA_0589|Chr1:233561451_233581182_+(Gnaq);circRNA_0591|Chr1:233578229_233581182_+(Gnaq);circRNA_1547|Chr12:13717791_13718009_-(Actb);circRNA_3794|Chr2:231056605_231078948_+(Camk2d);circRNA_4375|Chr3:128863086_128865813_+(Plcb4);circRNA_4376|Chr3:128908691_128911559_+(Plcb4);	rno04971
rno04972	Pancreatic secretion	Organismal Systems	Digestive system	5	201	55	2681	0.396225	0.985586	1.21257	circRNA_0589|Chr1:233561451_233581182_+(Gnaq);circRNA_0591|Chr1:233578229_233581182_+(Gnaq);circRNA_4375|Chr3:128863086_128865813_+(Plcb4);circRNA_4376|Chr3:128908691_128911559_+(Plcb4);circRNA_5986|Chr7:41167312_41167751_+(Atp2b1);	rno04972
rno04977	Vitamin digestion and absorption	Organismal Systems	Digestive system	1	201	8	2681	0.464363	0.985586	1.66729	circRNA_5564|Chr6:25409775_25417047_-(Plb1);	rno04977
rno04978	Mineral absorption	Organismal Systems	Digestive system	2	201	11	2681	0.197174	0.985586	2.42515	circRNA_4337|Chr3:119264196_119265879_-(Trpm7);circRNA_5986|Chr7:41167312_41167751_+(Atp2b1);	rno04978
rno05010	Alzheimer's disease	Human Diseases	Neurodegenerative disease	7	201	92	2681	0.542463	0.985586	1.01487	circRNA_0556|Chr1:221347566_221349792_-(Capn1);circRNA_0589|Chr1:233561451_233581182_+(Gnaq);circRNA_0591|Chr1:233578229_233581182_+(Gnaq);circRNA_2339|Chr15:51936366_51954838_-(Ppp3cc);circRNA_3821|Chr2:242041489_242041689_+(Ppp3ca);circRNA_4375|Chr3:128863086_128865813_+(Plcb4);circRNA_4376|Chr3:128908691_128911559_+(Plcb4);	rno05010
rno05014	Amyotrophic lateral sclerosis (ALS)	Human Diseases	Neurodegenerative disease	5	201	30	2681	0.0690688	0.985586	2.22305	circRNA_0032|Chr1:15474913_15494771_+(Map3k5);circRNA_0035|Chr1:15488392_15526167_+(Map3k5);circRNA_0038|Chr1:15545013_15551204_+(Map3k5);circRNA_2339|Chr15:51936366_51954838_-(Ppp3cc);circRNA_3821|Chr2:242041489_242041689_+(Ppp3ca);	rno05014
rno05016	Huntington's disease	Human Diseases	Neurodegenerative disease	9	201	61	2681	0.0355695	0.985586	1.96795	circRNA_0504|Chr1:214562895_214605872_+(Ap2a2);circRNA_0589|Chr1:233561451_233581182_+(Gnaq);circRNA_0591|Chr1:233578229_233581182_+(Gnaq);circRNA_1579|Chr12:24285582_24285875_+(Hip1);circRNA_2001|Chr14:33083680_33089673_-(Polr2b);circRNA_4375|Chr3:128863086_128865813_+(Plcb4);circRNA_4376|Chr3:128908691_128911559_+(Plcb4);circRNA_4845|Chr4:147295666_147361944_+(Pparg);circRNA_4846|Chr4:147295666…	rno05016
rno05031	Amphetamine addiction	Human Diseases	Substance dependence	3	201	45	2681	0.667822	0.985586	0.889221	circRNA_2339|Chr15:51936366_51954838_-(Ppp3cc);circRNA_3794|Chr2:231056605_231078948_+(Camk2d);circRNA_3821|Chr2:242041489_242041689_+(Ppp3ca);	rno05031
rno05032	Morphine addiction	Human Diseases	Substance dependence	2	201	39	2681	0.802983	0.985586	0.684016	circRNA_5467|Chr5:172936581_172957859_+(Gnb1);circRNA_5468|Chr5:172936581_172965700_+(Gnb1);	rno05032
rno05034	Alcoholism	Human Diseases	Substance dependence	4	201	36	2681	0.28234	0.985586	1.48203	circRNA_4703|Chr4:67449579_67455064_-(Braf);circRNA_5467|Chr5:172936581_172957859_+(Gnb1);circRNA_5468|Chr5:172936581_172965700_+(Gnb1);circRNA_5496|Chr6:3150789_3165551_-(Sos1);	rno05034
rno05100	Bacterial invasion of epithelial cells	Human Diseases	Infectious disease: bacterial	6	201	89	2681	0.668544	0.985586	0.899212	circRNA_0493|Chr1:206956299_206969242_+(Dock1);circRNA_1547|Chr12:13717791_13718009_-(Actb);circRNA_2927|Chr18:27956412_27984766_+(Ctnna1);circRNA_3181|Chr19:34266719_34272145_+(Arhgap10);circRNA_3190|Chr19:34298523_34346224_+(Arhgap10);circRNA_3193|Chr19:34372674_34395489_+(Arhgap10);	rno05100
rno05132	Salmonella infection	Human Diseases	Infectious disease: bacterial	2	201	42	2681	0.83536	0.985586	0.635158	circRNA_0220|Chr1:126149975_126164946_-(Tjp1);circRNA_1547|Chr12:13717791_13718009_-(Actb);	rno05132
rno05142	Chagas disease (American trypanosomiasis)	Human Diseases	Infectious disease: parasitic	5	201	52	2681	0.350105	0.985586	1.28253	circRNA_0589|Chr1:233561451_233581182_+(Gnaq);circRNA_0591|Chr1:233578229_233581182_+(Gnaq);circRNA_3057|Chr18:72593000_72595275_+(Smad2);circRNA_4375|Chr3:128863086_128865813_+(Plcb4);circRNA_4376|Chr3:128908691_128911559_+(Plcb4);	rno05142
rno05143	African trypanosomiasis	Human Diseases	Infectious disease: parasitic	4	201	17	2681	0.033629	0.985586	3.13843	circRNA_0589|Chr1:233561451_233581182_+(Gnaq);circRNA_0591|Chr1:233578229_233581182_+(Gnaq);circRNA_4375|Chr3:128863086_128865813_+(Plcb4);circRNA_4376|Chr3:128908691_128911559_+(Plcb4);	rno05143
rno05146	Amoebiasis	Human Diseases	Infectious disease: parasitic	4	201	79	2681	0.85611	0.985586	0.675357	circRNA_0589|Chr1:233561451_233581182_+(Gnaq);circRNA_0591|Chr1:233578229_233581182_+(Gnaq);circRNA_4375|Chr3:128863086_128865813_+(Plcb4);circRNA_4376|Chr3:128908691_128911559_+(Plcb4);	rno05146
rno05152	Tuberculosis	Human Diseases	Infectious disease: bacterial	6	201	81	2681	0.575122	0.985586	0.988023	circRNA_2339|Chr15:51936366_51954838_-(Ppp3cc);circRNA_3794|Chr2:231056605_231078948_+(Camk2d);circRNA_3821|Chr2:242041489_242041689_+(Ppp3ca);circRNA_5042|Chr5:29851601_29865341_-(Ripk2);circRNA_5983|Chr7:37119218_37131623_+(Eea1);circRNA_6343|Chr8:47303909_47306590_-(Arhgef12);	rno05152
rno05160	Hepatitis C	Human Diseases	Infectious disease: viral	6	201	59	2681	0.278783	0.985586	1.35644	circRNA_3372|Chr2:30559682_30566431_-(Ocln);circRNA_4703|Chr4:67449579_67455064_-(Braf);circRNA_5496|Chr6:3150789_3165551_-(Sos1);circRNA_6203|Chr7:126667194_126669197_+(Ppara);circRNA_6204|Chr7:126667194_126671241_+(Ppara);circRNA_6435|Chr8:67808880_67812158_-(Pias1);	rno05160
rno05161	Hepatitis B	Human Diseases	Infectious disease: viral	2	201	79	2681	0.985332	0.994955	0.337679	circRNA_0647|Chr1:251455609_251485480_+(Pten);circRNA_3203|Chr19:38057557_38062193_+(Nfatc3);	rno05161
rno05162	Measles	Human Diseases	Infectious disease: viral	1	201	28	2681	0.888484	0.985586	0.476368	circRNA_4405|Chr3:147736963_147740988_+(Csnk2a1);	rno05162
rno05164	Influenza A	Human Diseases	Infectious disease: viral	1	201	67	2681	0.994955	0.994955	0.199079	circRNA_1547|Chr12:13717791_13718009_-(Actb);	rno05164
rno05165	Human papillomavirus infection	Human Diseases	Infectious disease: viral	8	201	188	2681	0.978013	0.994955	0.567588	circRNA_0647|Chr1:251455609_251485480_+(Pten);circRNA_1427|Chr11:72245130_72264219_-(Dlg1);circRNA_2564|Chr16:68958915_68959689_+(Eif4ebp1);circRNA_3425|Chr2:47139938_47146434_-(Itga1);circRNA_5228|Chr5:117052259_117060839_+(Patj);circRNA_5496|Chr6:3150789_3165551_-(Sos1);circRNA_5919|Chr7:3368026_3372361_+(Itga7);circRNA_6032|Chr7:60733754_60737965_-(Mdm2);	rno05165
rno05166	HTLV-I infection	Human Diseases	Infectious disease: viral	6	201	143	2681	0.964946	0.994955	0.559649	circRNA_1215|Chr10:94307816_94320863_+(Map3k3);circRNA_1427|Chr11:72245130_72264219_-(Dlg1);circRNA_2339|Chr15:51936366_51954838_-(Ppp3cc);circRNA_3057|Chr18:72593000_72595275_+(Smad2);circRNA_3203|Chr19:38057557_38062193_+(Nfatc3);circRNA_3821|Chr2:242041489_242041689_+(Ppp3ca);	rno05166
rno05167	Kaposi's sarcoma-associated herpesvirus infection	Human Diseases	Infectious disease: viral	5	201	98	2681	0.871153	0.985586	0.680526	circRNA_2339|Chr15:51936366_51954838_-(Ppp3cc);circRNA_3203|Chr19:38057557_38062193_+(Nfatc3);circRNA_3821|Chr2:242041489_242041689_+(Ppp3ca);circRNA_5467|Chr5:172936581_172957859_+(Gnb1);circRNA_5468|Chr5:172936581_172965700_+(Gnb1);	rno05167
rno05168	Herpes simplex infection	Human Diseases	Infectious disease: viral	1	201	64	2681	0.993588	0.994955	0.208411	circRNA_4405|Chr3:147736963_147740988_+(Csnk2a1);	rno05168
rno05169	Epstein-Barr virus infection	Human Diseases	Infectious disease: viral	5	201	93	2681	0.839773	0.985586	0.717113	circRNA_1392|Chr11:66082755_66083227_+(Gtf2e1);circRNA_2001|Chr14:33083680_33089673_-(Polr2b);circRNA_2557|Chr16:62132750_62160831_-(Gtf2e2);circRNA_4405|Chr3:147736963_147740988_+(Csnk2a1);circRNA_6032|Chr7:60733754_60737965_-(Mdm2);	rno05169
rno05200	Pathways in cancer	Human Diseases	Cancer: overview	20	201	258	2681	0.473034	0.985586	1.03398	circRNA_0449|Chr1:200648164_200671090_-(Fgfr2);circRNA_0589|Chr1:233561451_233581182_+(Gnaq);circRNA_0591|Chr1:233578229_233581182_+(Gnaq);circRNA_0647|Chr1:251455609_251485480_+(Pten);circRNA_2606|Chr17:1059417_1065593_-(Ptch1);circRNA_2927|Chr18:27956412_27984766_+(Ctnna1);circRNA_3057|Chr18:72593000_72595275_+(Smad2);circRNA_3745|Chr2:210808354_210822401_-(Gstm1);circRNA_3794|Chr2:231056605_23…	rno05200
rno05202	Transcriptional misregulation in cancers	Human Diseases	Cancer: overview	7	201	93	2681	0.554332	0.985586	1.00396	circRNA_4565|Chr4:26336094_26341599_+(Cdk14);circRNA_4845|Chr4:147295666_147361944_+(Pparg);circRNA_4846|Chr4:147295666_147372423_+(Pparg);circRNA_5208|Chr5:106171074_106171781_-(Mllt3);circRNA_5209|Chr5:106171074_106202563_-(Mllt3);circRNA_6032|Chr7:60733754_60737965_-(Mdm2);circRNA_6751|Chr9:18319246_18334707_-(Supt3h);	rno05202
rno05203	Viral carcinogenesis	Human Diseases	Cancer: overview	4	201	84	2681	0.886959	0.985586	0.635158	circRNA_1392|Chr11:66082755_66083227_+(Gtf2e1);circRNA_1427|Chr11:72245130_72264219_-(Dlg1);circRNA_2557|Chr16:62132750_62160831_-(Gtf2e2);circRNA_6032|Chr7:60733754_60737965_-(Mdm2);	rno05203
rno05204	Chemical carcinogenesis	Human Diseases	Cancer: overview	1	201	15	2681	0.690301	0.985586	0.889221	circRNA_3745|Chr2:210808354_210822401_-(Gstm1);	rno05204
rno05205	Proteoglycans in cancer	Human Diseases	Cancer: overview	14	201	166	2681	0.361437	0.985586	1.12492	circRNA_0677|Chr1:257183839_257192683_+(Plce1);circRNA_0679|Chr1:257191149_257192683_+(Plce1);circRNA_1547|Chr12:13717791_13718009_-(Actb);circRNA_2606|Chr17:1059417_1065593_-(Ptch1);circRNA_3057|Chr18:72593000_72595275_+(Smad2);circRNA_3471|Chr2:62955690_62956953_+(Drosha);circRNA_3794|Chr2:231056605_231078948_+(Camk2d);circRNA_3940|Chr20:20403689_20411476_+(Ank3);circRNA_4703|Chr4:67449579_6745…	rno05205
rno05206	MicroRNAs in cancer	Human Diseases	Cancer: overview	4	201	82	2681	0.875379	0.985586	0.650649	circRNA_0647|Chr1:251455609_251485480_+(Pten);circRNA_5496|Chr6:3150789_3165551_-(Sos1);circRNA_5804|Chr6:124625936_124652103_-(Rps6ka5);circRNA_6032|Chr7:60733754_60737965_-(Mdm2);	rno05206
rno05210	Colorectal cancer	Human Diseases	Cancer: specific types	3	201	61	2681	0.848265	0.985586	0.655982	circRNA_3057|Chr18:72593000_72595275_+(Smad2);circRNA_4703|Chr4:67449579_67455064_-(Braf);circRNA_5496|Chr6:3150789_3165551_-(Sos1);	rno05210
rno05211	Renal cell carcinoma	Human Diseases	Cancer: specific types	4	201	52	2681	0.555174	0.985586	1.02602	circRNA_4703|Chr4:67449579_67455064_-(Braf);circRNA_5496|Chr6:3150789_3165551_-(Sos1);circRNA_7190|ChrX:114972099_114978572_+(Pak3);circRNA_7191|ChrX:114972099_114999004_+(Pak3);	rno05211
rno05212	Pancreatic cancer	Human Diseases	Cancer: specific types	4	201	61	2681	0.682949	0.985586	0.874643	circRNA_3057|Chr18:72593000_72595275_+(Smad2);circRNA_3513|Chr2:113739689_113747247_+(Pld1);circRNA_3516|Chr2:113788385_113806098_+(Pld1);circRNA_4703|Chr4:67449579_67455064_-(Braf);	rno05212
rno05213	Endometrial cancer	Human Diseases	Cancer: specific types	4	201	43	2681	0.40492	0.985586	1.24077	circRNA_0647|Chr1:251455609_251485480_+(Pten);circRNA_2927|Chr18:27956412_27984766_+(Ctnna1);circRNA_4703|Chr4:67449579_67455064_-(Braf);circRNA_5496|Chr6:3150789_3165551_-(Sos1);	rno05213
rno05214	Glioma	Human Diseases	Cancer: specific types	5	201	47	2681	0.27438	0.985586	1.41897	circRNA_0647|Chr1:251455609_251485480_+(Pten);circRNA_3794|Chr2:231056605_231078948_+(Camk2d);circRNA_4703|Chr4:67449579_67455064_-(Braf);circRNA_5496|Chr6:3150789_3165551_-(Sos1);circRNA_6032|Chr7:60733754_60737965_-(Mdm2);	rno05214
rno05215	Prostate cancer	Human Diseases	Cancer: specific types	5	201	62	2681	0.501795	0.985586	1.07567	circRNA_0449|Chr1:200648164_200671090_-(Fgfr2);circRNA_0647|Chr1:251455609_251485480_+(Pten);circRNA_4703|Chr4:67449579_67455064_-(Braf);circRNA_5496|Chr6:3150789_3165551_-(Sos1);circRNA_6032|Chr7:60733754_60737965_-(Mdm2);	rno05215
rno05216	Thyroid cancer	Human Diseases	Cancer: specific types	3	201	20	2681	0.185303	0.985586	2.00075	circRNA_4703|Chr4:67449579_67455064_-(Braf);circRNA_4845|Chr4:147295666_147361944_+(Pparg);circRNA_4846|Chr4:147295666_147372423_+(Pparg);	rno05216
rno05217	Basal cell carcinoma	Human Diseases	Cancer: specific types	1	201	9	2681	0.504641	0.985586	1.48203	circRNA_2606|Chr17:1059417_1065593_-(Ptch1);	rno05217
rno05218	Melanoma	Human Diseases	Cancer: specific types	3	201	38	2681	0.551271	0.985586	1.05302	circRNA_0647|Chr1:251455609_251485480_+(Pten);circRNA_4703|Chr4:67449579_67455064_-(Braf);circRNA_6032|Chr7:60733754_60737965_-(Mdm2);	rno05218
rno05219	Bladder cancer	Human Diseases	Cancer: specific types	3	201	27	2681	0.329937	0.985586	1.48203	circRNA_4703|Chr4:67449579_67455064_-(Braf);circRNA_5804|Chr6:124625936_124652103_-(Rps6ka5);circRNA_6032|Chr7:60733754_60737965_-(Mdm2);	rno05219
rno05220	Chronic myeloid leukemia	Human Diseases	Cancer: specific types	3	201	51	2681	0.748929	0.985586	0.784606	circRNA_4703|Chr4:67449579_67455064_-(Braf);circRNA_5496|Chr6:3150789_3165551_-(Sos1);circRNA_6032|Chr7:60733754_60737965_-(Mdm2);	rno05220
rno05221	Acute myeloid leukemia	Human Diseases	Cancer: specific types	3	201	36	2681	0.513885	0.985586	1.11153	circRNA_2564|Chr16:68958915_68959689_+(Eif4ebp1);circRNA_4703|Chr4:67449579_67455064_-(Braf);circRNA_5496|Chr6:3150789_3165551_-(Sos1);	rno05221
rno05222	Small cell lung cancer	Human Diseases	Cancer: specific types	1	201	62	2681	0.992477	0.994955	0.215134	circRNA_0647|Chr1:251455609_251485480_+(Pten);	rno05222
rno05223	Non-small cell lung cancer	Human Diseases	Cancer: specific types	2	201	47	2681	0.878816	0.985586	0.567588	circRNA_4703|Chr4:67449579_67455064_-(Braf);circRNA_5496|Chr6:3150789_3165551_-(Sos1);	rno05223
rno05224	Breast cancer	Human Diseases	Cancer: specific types	3	201	57	2681	0.81347	0.985586	0.702016	circRNA_0647|Chr1:251455609_251485480_+(Pten);circRNA_4703|Chr4:67449579_67455064_-(Braf);circRNA_5496|Chr6:3150789_3165551_-(Sos1);	rno05224
rno05225	Hepatocellular carcinoma	Human Diseases	Cancer: specific types	8	201	102	2681	0.502127	0.985586	1.04614	circRNA_0647|Chr1:251455609_251485480_+(Pten);circRNA_1547|Chr12:13717791_13718009_-(Actb);circRNA_2458|Chr16:7126591_7138308_+(Pbrm1);circRNA_3057|Chr18:72593000_72595275_+(Smad2);circRNA_3745|Chr2:210808354_210822401_-(Gstm1);circRNA_4703|Chr4:67449579_67455064_-(Braf);circRNA_5496|Chr6:3150789_3165551_-(Sos1);circRNA_5918|Chr7:2888642_2889413_+(Smarcc2);	rno05225
rno05226	Gastric cancer	Human Diseases	Cancer: specific types	5	201	76	2681	0.685783	0.985586	0.87752	circRNA_0449|Chr1:200648164_200671090_-(Fgfr2);circRNA_2927|Chr18:27956412_27984766_+(Ctnna1);circRNA_3057|Chr18:72593000_72595275_+(Smad2);circRNA_4703|Chr4:67449579_67455064_-(Braf);circRNA_5496|Chr6:3150789_3165551_-(Sos1);	rno05226
rno05230	Central carbon metabolism in cancer	Human Diseases	Cancer: overview	3	201	34	2681	0.474926	0.985586	1.17691	circRNA_0449|Chr1:200648164_200671090_-(Fgfr2);circRNA_0647|Chr1:251455609_251485480_+(Pten);circRNA_0722|Chr1:261165387_261165588_-(Pgam1);	rno05230
rno05231	Choline metabolism in cancer	Human Diseases	Cancer: overview	5	201	61	2681	0.487067	0.985586	1.0933	circRNA_2564|Chr16:68958915_68959689_+(Eif4ebp1);circRNA_3513|Chr2:113739689_113747247_+(Pld1);circRNA_3516|Chr2:113788385_113806098_+(Pld1);circRNA_5105|Chr5:70292288_70326250_+(Slc44a1);circRNA_5496|Chr6:3150789_3165551_-(Sos1);	rno05231
rno05321	Inflammatiory bowel disease (IBD)	Human Diseases	Immune disease	1	201	14	2681	0.665058	0.985586	0.952736	circRNA_3057|Chr18:72593000_72595275_+(Smad2);	rno05321
rno05323	Rheumatoid arthritis	Human Diseases	Immune disease	1	201	17	2681	0.735248	0.985586	0.784606	circRNA_5217|Chr5:113794314_113803150_+(Tek);	rno05323
rno05410	Hypertrophic cardiomyopathy (HCM)	Human Diseases	Cardiovascular disease	5	201	60	2681	0.472191	0.985586	1.11153	circRNA_1547|Chr12:13717791_13718009_-(Actb);circRNA_3425|Chr2:47139938_47146434_-(Itga1);circRNA_4552|Chr4:15748953_15780820_-(Cacna2d1);circRNA_4554|Chr4:15760711_15780820_-(Cacna2d1);circRNA_5919|Chr7:3368026_3372361_+(Itga7);	rno05410
rno05412	Arrhythmogenic right ventricular cardiomyopathy (ARVC)	Human Diseases	Cardiovascular disease	7	201	59	2681	0.149116	0.985586	1.58251	circRNA_1474|Chr11:88940949_88954297_-(Pkp2);circRNA_1547|Chr12:13717791_13718009_-(Actb);circRNA_2927|Chr18:27956412_27984766_+(Ctnna1);circRNA_3425|Chr2:47139938_47146434_-(Itga1);circRNA_4552|Chr4:15748953_15780820_-(Cacna2d1);circRNA_4554|Chr4:15760711_15780820_-(Cacna2d1);circRNA_5919|Chr7:3368026_3372361_+(Itga7);	rno05412
rno05414	Dilated cardiomyopathy (DCM)	Human Diseases	Cardiovascular disease	5	201	69	2681	0.599612	0.985586	0.966544	circRNA_1547|Chr12:13717791_13718009_-(Actb);circRNA_3425|Chr2:47139938_47146434_-(Itga1);circRNA_4552|Chr4:15748953_15780820_-(Cacna2d1);circRNA_4554|Chr4:15760711_15780820_-(Cacna2d1);circRNA_5919|Chr7:3368026_3372361_+(Itga7);	rno05414
rno05416	Viral myocarditis	Human Diseases	Cardiovascular disease	1	201	22	2681	0.821204	0.985586	0.606287	circRNA_1547|Chr12:13717791_13718009_-(Actb);	rno05416
rno05418	Fluid shear stress and atherosclerosis	Human Diseases	Cardiovascular disease	7	201	81	2681	0.405745	0.985586	1.15269	circRNA_0032|Chr1:15474913_15494771_+(Map3k5);circRNA_0035|Chr1:15488392_15526167_+(Map3k5);circRNA_0038|Chr1:15545013_15551204_+(Map3k5);circRNA_0232|Chr1:128239552_128242835_-(Mef2a);circRNA_0233|Chr1:128239552_128243030_-(Mef2a);circRNA_1547|Chr12:13717791_13718009_-(Actb);circRNA_3745|Chr2:210808354_210822401_-(Gstm1);	rno05418

## Sheet: down-regulated(SSCI–1 vs. sham)
id	Term	Classification_level1	Classification_level2	ListHits	ListTotal	PopHits	PopTotal	p-value	q-value	Enrichment_score	Gene	hyperlink_only_excel
rno00010	Glycolysis / Gluconeogenesis	Metabolism	Carbohydrate metabolism	5	425	64	7679	0.279545	0.696323	1.41158	Acss1;Adh1;Adh4;Aldoc;Eno3	rno00010
rno00020	Citrate cycle (TCA cycle)	Metabolism	Carbohydrate metabolism	1	425	31	7679	0.829425	1	0.582846	Idh2	rno00020
rno00030	Pentose phosphate pathway	Metabolism	Carbohydrate metabolism	2	425	29	7679	0.482589	1	1.24609	Aldoc;Rgn	rno00030
rno00040	Pentose and glucuronate interconversions	Metabolism	Carbohydrate metabolism	1	425	33	7679	0.847858	1	0.547522	Ugt2b1	rno00040
rno00051	Fructose and mannose metabolism	Metabolism	Carbohydrate metabolism	1	425	34	7679	0.856314	1	0.531419	Aldoc	rno00051
rno00053	Ascorbate and aldarate metabolism	Metabolism	Carbohydrate metabolism	2	425	26	7679	0.426029	0.964021	1.38986	Rgn;Ugt2b1	rno00053
rno00061	Fatty acid biosynthesis	Metabolism	Lipid metabolism	2	425	13	7679	0.159536	0.465673	2.77973	Acacb;Acsl6	rno00061
rno00062	Fatty acid elongation	Metabolism	Lipid metabolism	1	425	28	7679	0.797519	1	0.645294	Elovl4	rno00062
rno00071	Fatty acid degradation	Metabolism	Lipid metabolism	4	425	44	7679	0.22478	0.583485	1.64257	Acadsb;Acsl6;Adh1;Adh4	rno00071
rno00072	Synthesis and degradation of ketone bodies	Metabolism	Lipid metabolism	1	425	10	7679	0.434309	0.973575	1.80682	Bdh2	rno00072
rno00100	Steroid biosynthesis	Metabolism	Lipid metabolism	1	425	19	7679	0.661454	1	0.95096	Cel	rno00100
rno00120	Primary bile acid biosynthesis	Metabolism	Lipid metabolism	5	425	16	7679	0.00133194	0.0210761	5.64632	Acox2;Akr1d1;Cyp46a1;Cyp8b1;Slc27a5	rno00120
rno00140	Steroid hormone biosynthesis	Metabolism	Lipid metabolism	8	425	75	7679	0.0543821	0.256646	1.92728	Akr1d1;Cyp11a1;Cyp21a1;Cyp2c23;Cyp2d4;Cyp2e1;Cyp3a18;Ugt2b1	rno00140
rno00190	Oxidative phosphorylation	Metabolism	Energy metabolism	3	425	119	7679	0.964393	1	0.455502	Atp6v0d2;Atp6v1b1;Atp6v1g2	rno00190
rno00230	Purine metabolism	Metabolism	Nucleotide metabolism	12	425	169	7679	0.225585	0.583485	1.28295	Adcy1;Adcy5;Adcy9;Gmpr;Gucy1a3;Nt5c1a;Nt5e;Pde1b;Pde2a;Pde3a;Pde5a;Pde9a	rno00230
rno00240	Pyrimidine metabolism	Metabolism	Nucleotide metabolism	2	425	96	7679	0.972649	1	0.376422	Nt5c1a;Nt5e	rno00240
rno00250	Alanine, aspartate and glutamate metabolism	Metabolism	Amino acid metabolism	2	425	35	7679	0.58473	1	1.03247	Abat;Folh1	rno00250
rno00260	Glycine, serine and threonine metabolism	Metabolism	Amino acid metabolism	3	425	38	7679	0.351983	0.830557	1.42644	Cbs;Maoa;Maob	rno00260
rno00270	Cysteine and methionine metabolism	Metabolism	Amino acid metabolism	1	425	45	7679	0.923443	1	0.401516	Cbs	rno00270
rno00280	Valine, leucine and isoleucine degradation	Metabolism	Amino acid metabolism	5	425	53	7679	0.167919	0.465673	1.70455	Abat;Acadsb;Aldh6a1;Aox1;Aox3	rno00280
rno00310	Lysine degradation	Metabolism	Amino acid metabolism	4	425	54	7679	0.350041	0.830557	1.33839	Aass;Bbox1;Prdm6;Prdm9	rno00310
rno00330	Arginine and proline metabolism	Metabolism	Amino acid metabolism	5	425	48	7679	0.124398	0.427821	1.88211	Carns1;Ckm;Maoa;Maob;Prodh1	rno00330
rno00340	Histidine metabolism	Metabolism	Amino acid metabolism	3	425	23	7679	0.131594	0.435132	2.35673	Carns1;Maoa;Maob	rno00340
rno00350	Tyrosine metabolism	Metabolism	Amino acid metabolism	9	425	38	7679	0.00017325	0.00517824	4.27932	Adh1;Adh4;Aox1;Aox3;Dct;Ddc;Maoa;Maob;Pnmt	rno00350
rno00360	Phenylalanine metabolism	Metabolism	Amino acid metabolism	3	425	20	7679	0.0954458	0.38283	2.71024	Ddc;Maoa;Maob	rno00360
rno00380	Tryptophan metabolism	Metabolism	Amino acid metabolism	5	425	45	7679	0.101175	0.38283	2.00758	Aox1;Aox3;Ddc;Maoa;Maob	rno00380
rno00410	beta-Alanine metabolism	Metabolism	Metabolism of other amino acids	3	425	30	7679	0.229492	0.587937	1.80682	Abat;Aldh6a1;Carns1	rno00410
rno00480	Glutathione metabolism	Metabolism	Metabolism of other amino acids	4	425	58	7679	0.401144	0.922289	1.24609	Gstm7;Idh2;Nat8;Nat8f3	rno00480
rno00500	Starch and sucrose metabolism	Metabolism	Carbohydrate metabolism	2	425	29	7679	0.482589	1	1.24609	Pygb;Pygm	rno00500
rno00510	N-Glycan biosynthesis	Metabolism	Glycan biosynthesis and metabolism	1	425	48	7679	0.935532	1	0.376422	St6gal2	rno00510
rno00512	Mucin type O-glycan biosynthesis	Metabolism	Glycan biosynthesis and metabolism	1	425	27	7679	0.785611	1	0.669194	Galnt15	rno00512
rno00514	Other types of O-glycan biosynthesis	Metabolism	Glycan biosynthesis and metabolism	1	425	22	7679	0.714743	1	0.821283	St6gal2	rno00514
rno00520	Amino sugar and nucleotide sugar metabolism	Metabolism	Carbohydrate metabolism	2	425	47	7679	0.742539	1	0.768861	Cmah;Cyb5r2	rno00520
rno00531	Glycosaminoglycan degradation	Metabolism	Glycan biosynthesis and metabolism	1	425	20	7679	0.680238	1	0.903412	Hpse2	rno00531
rno00534	Glycosaminoglycan biosynthesis - heparan sulfate / heparin	Metabolism	Glycan biosynthesis and metabolism	3	425	25	7679	0.157941	0.465673	2.16819	Extl1;Ndst3;Ndst4	rno00534
rno00561	Glycerolipid metabolism	Metabolism	Lipid metabolism	9	425	61	7679	0.00596812	0.0668927	2.66581	Agpat4;Cel;Dgkb;Dgkg;Dgki;Gpat2;Lpin1;Plpp3;Pnpla2	rno00561
rno00562	Inositol phosphate metabolism	Metabolism	Carbohydrate metabolism	4	425	73	7679	0.581029	1	0.99004	Aldh6a1;Itpk1;Itpkb;Mtmr7	rno00562
rno00564	Glycerophospholipid metabolism	Metabolism	Lipid metabolism	12	425	96	7679	0.0064339	0.0692288	2.25853	Agpat4;Cds2;Chka;Dgkb;Dgkg;Dgki;Gpat2;Gpd1;Lpin1;Pla2g2a;Pla2g5;Plpp3	rno00564
rno00565	Ether lipid metabolism	Metabolism	Lipid metabolism	7	425	45	7679	0.01106	0.0991715	2.81061	Enpp2;Gal3st1;Pla2g2a;Pla2g5;Plpp3;Tmem86b;Ugt8	rno00565
rno00590	Arachidonic acid metabolism	Metabolism	Lipid metabolism	9	425	77	7679	0.0256065	0.164003	2.11187	Alox12;Cyp2c23;Cyp2e1;Cyp2j3;Cyp2j4;Cyp4f1;Cyp4f18;Pla2g2a;Pla2g5	rno00590
rno00591	Linoleic acid metabolism	Metabolism	Lipid metabolism	7	425	39	7679	0.00498312	0.0609299	3.24302	Cyp2c23;Cyp2e1;Cyp2j3;Cyp2j4;Cyp3a18;Pla2g2a;Pla2g5	rno00591
rno00592	alpha-Linolenic acid metabolism	Metabolism	Lipid metabolism	2	425	23	7679	0.366414	0.851919	1.57115	Pla2g2a;Pla2g5	rno00592
rno00600	Sphingolipid metabolism	Metabolism	Lipid metabolism	5	425	49	7679	0.132642	0.435132	1.8437	Cers4;Gal3st1;Plpp3;Sptlc3;Ugt8	rno00600
rno00601	Glycosphingolipid biosynthesis - lacto and neolacto series	Metabolism	Glycan biosynthesis and metabolism	4	425	29	7679	0.0735693	0.324429	2.49217	B3galt5;Fut2;Gcnt2;Gcnt6	rno00601
rno00603	Glycosphingolipid biosynthesis - globo and isoglobo series	Metabolism	Glycan biosynthesis and metabolism	2	425	15	7679	0.200122	0.538327	2.4091	B3galt5;Fut2	rno00603
rno00620	Pyruvate metabolism	Metabolism	Carbohydrate metabolism	3	425	39	7679	0.36737	0.851919	1.38986	Acacb;Acss1;Me3	rno00620
rno00640	Propanoate metabolism	Metabolism	Carbohydrate metabolism	4	425	31	7679	0.0895263	0.364887	2.33139	Abat;Acacb;Acss1;Aldh6a1	rno00640
rno00650	Butanoate metabolism	Metabolism	Carbohydrate metabolism	4	425	25	7679	0.0464981	0.245414	2.89092	Abat;Acsm4;Acsm5;Bdh2	rno00650
rno00730	Thiamine metabolism	Metabolism	Metabolism of cofactors and vitamins	1	425	15	7679	0.574652	1	1.20455	Alpp	rno00730
rno00750	Vitamin B6 metabolism	Metabolism	Metabolism of cofactors and vitamins	2	425	10	7679	0.102467	0.38283	3.61365	Aox1;Aox3	rno00750
rno00760	Nicotinate and nicotinamide metabolism	Metabolism	Metabolism of cofactors and vitamins	5	425	32	7679	0.0296729	0.1774	2.82316	Aox1;Aox3;Nmrk2;Nt5c1a;Nt5e	rno00760
rno00790	Folate biosynthesis	Metabolism	Metabolism of cofactors and vitamins	1	425	26	7679	0.773005	1	0.694932	Alpp	rno00790
rno00830	Retinol metabolism	Metabolism	Metabolism of cofactors and vitamins	9	425	80	7679	0.0318726	0.186385	2.03268	Adh1;Adh4;Aox1;Aox3;Awat2;Cyp26b1;Cyp2c23;Cyp3a18;Ugt2b1	rno00830
rno00860	Porphyrin and chlorophyll metabolism	Metabolism	Metabolism of cofactors and vitamins	1	425	40	7679	0.898065	1	0.451706	Ugt2b1	rno00860
rno00910	Nitrogen metabolism	Metabolism	Energy metabolism	1	425	17	7679	0.620521	1	1.06284	Car14	rno00910
rno00980	Metabolism of xenobiotics by cytochrome P450	Metabolism	Xenobiotics biodegradation and metabolism	6	425	64	7679	0.141475	0.447728	1.6939	Adh1;Adh4;Cyp2e1;Cyp2f4;Gstm7;Ugt2b1	rno00980
rno00982	Drug metabolism - cytochrome P450	Metabolism	Xenobiotics biodegradation and metabolism	13	425	65	7679	4.45427e-05	0.00190037	3.61365	Adh1;Adh4;Aox1;Aox3;Cyp2e1;Fmo1;Fmo2;Fmo3;Fmo6;Gstm7;Maoa;Maob;Ugt2b1	rno00982
rno00983	Drug metabolism - other enzymes	Metabolism	Xenobiotics biodegradation and metabolism	5	425	83	7679	0.489317	1	1.08845	Ces1d;Ces1f;Cyp2e1;Gstm7;Ugt2b1	rno00983
rno01040	Biosynthesis of unsaturated fatty acids	Metabolism	Lipid metabolism	1	425	26	7679	0.773005	1	0.694932	Scd	rno01040
rno01521	EGFR tyrosine kinase inhibitor resistance	Human Diseases	Drug resistance: antineoplastic	1	425	79	7679	0.989129	1	0.228712	Egf	rno01521
rno01522	Endocrine resistance	Human Diseases	Drug resistance: antineoplastic	3	425	93	7679	0.895422	1	0.582846	Adcy1;Adcy5;Adcy9	rno01522
rno01523	Antifolate resistance	Human Diseases	Drug resistance: antineoplastic	1	425	30	7679	0.81939	1	0.602275	Alox12	rno01523
rno01524	Platinum drug resistance	Human Diseases	Drug resistance: antineoplastic	1	425	76	7679	0.987081	1	0.23774	Gstm7	rno01524
rno02010	ABC transporters	Environmental Information Processing	Membrane transport	7	425	47	7679	0.013946	0.117234	2.69101	Abca6;Abca8a;Abcb1a;Abcc6;Abcc9;Abcd2;Abcg4	rno02010
rno03013	RNA transport	Genetic Information Processing	Translation	1	425	160	7679	0.9999	1	0.112926	Pabpc1l	rno03013
rno03015	mRNA surveillance pathway	Genetic Information Processing	Translation	2	425	92	7679	0.966791	1	0.392788	Msi1;Pabpc1l	rno03015
rno03018	RNA degradation	Genetic Information Processing	Folding, sorting and degradation	2	425	80	7679	0.941103	1	0.451706	Eno3;Pabpc1l	rno03018
rno03022	Basal transcription factors	Genetic Information Processing	Transcription	1	425	41	7679	0.903737	1	0.440689	Gtf2a1l	rno03022
rno03040	Spliceosome	Genetic Information Processing	Transcription	1	425	129	7679	0.999394	1	0.140064	Hspa2	rno03040
rno03320	PPAR signaling pathway	Organismal Systems	Endocrine system	9	425	79	7679	0.0296766	0.1774	2.05841	Acox2;Acsl6;Cyp8b1;Plin1;Plin4;Rxrg;Scd;Slc27a5;Slc27a6	rno03320
rno03450	Non-homologous end-joining	Genetic Information Processing	Replication and repair	1	425	13	7679	0.523252	1	1.38986	Polm	rno03450
rno04010	MAPK signaling pathway	Environmental Information Processing	Signal transduction	15	425	288	7679	0.635512	1	0.941054	Cacna1a;Cacna1b;Cacna1h;Cacna1i;Cacna2d3;Cacnb2;Cacnb4;Egf;Hspa2;Ntf3;Ntrk2;Ppp3r2;Rasgrf2;Rasgrp2;Rps6ka2	rno04010
rno04012	ErbB signaling pathway	Environmental Information Processing	Signal transduction	2	425	85	7679	0.953528	1	0.425135	Egf;Pak3	rno04012
rno04014	Ras signaling pathway	Environmental Information Processing	Signal transduction	9	425	227	7679	0.889031	1	0.716362	Egf;Ntf3;Ntrk2;Pak3;Pla2g2a;Pla2g5;Rasal1;Rasgrf2;Rasgrp2	rno04014
rno04015	Rap1 signaling pathway	Environmental Information Processing	Signal transduction	12	425	205	7679	0.463582	1	1.05765	Adcy1;Adcy5;Adcy9;Adora2b;Cnr1;Egf;Gnao1;Lpar3;Magi2;Pard6a;Prkd1;Rasgrp2	rno04015
rno04020	Calcium signaling pathway	Environmental Information Processing	Signal transduction	33	425	182	7679	9.49978e-10	1.27772e-07	3.27611	Adcy1;Adcy9;Adora2b;Adra1a;Adra1b;Adrb3;Atp2a3;Atp2b4;Avpr1a;Cacna1a;Cacna1b;Cacna1h;Cacna1i;Camk4;Chrna7;Gna14;Grin2c;Itpkb;Itpr1;Mylk;Ntsr1;Oxtr;P2rx1;P2rx2;P2rx6;Pde1b;Phkg1;Pln;Ppp3r2;Ryr3;Slc8a2;Tacr2;Tacr3	rno04020
rno04022	cGMP - PKG signaling pathway	Environmental Information Processing	Signal transduction	27	425	164	7679	2.66315e-07	2.38795e-05	2.97465	Adcy1;Adcy5;Adcy9;Adra1a;Adra1b;Adrb3;Atp1a2;Atp1a4;Atp1b2;Atp2a3;Atp2b4;Gucy1a3;Itpr1;Kcnma1;Kcnmb2;Kcnmb4;Mef2b;Mrvi1;Mylk;Pde2a;Pde3a;Pde5a;Pln;Ppp1r12a;Ppp3r2;Rgs2;Slc8a2	rno04022
rno04024	cAMP signaling pathway	Environmental Information Processing	Signal transduction	21	425	194	7679	0.00235981	0.0323062	1.95584	Adcy1;Adcy5;Adcy9;Adcyap1r1;Atp1a2;Atp1a4;Atp1b2;Atp2b4;Camk4;Cnga3;Fxyd1;Gria2;Grin2c;Grin3a;Htr1d;Npy1r;Oxtr;Pde3a;Pln;Ppp1r12a;Sstr1	rno04024
rno04060	Cytokine-cytokine receptor interaction	Environmental Information Processing	Signaling molecules and interaction	18	425	240	7679	0.115878	0.410147	1.35512	Acvr2b;Ccl21;Ccl24;Ccl27;Ccr10;Cntfr;Cxcr6;Egf;Il11ra1;Il12a;Il17d;Lep;Lepr;Lifr;Prlr;Tnfrsf17;Tnfrsf19;Tnfsf10	rno04060
rno04062	Chemokine signaling pathway	Organismal Systems	Immune system	9	425	172	7679	0.618001	1	0.945431	Adcy1;Adcy5;Adcy9;Ccl21;Ccl24;Ccl27;Ccr10;Cxcr6;Rasgrp2	rno04062
rno04064	NF-kappa B signaling pathway	Environmental Information Processing	Signal transduction	1	425	89	7679	0.993888	1	0.203014	Ccl21	rno04064
rno04066	HIF-1 signaling pathway	Environmental Information Processing	Signal transduction	3	425	99	7679	0.917764	1	0.547522	Egf;Egln3;Eno3	rno04066
rno04068	FoxO signaling pathway	Environmental Information Processing	Signal transduction	9	425	130	7679	0.2925	0.721858	1.25088	Agap2;Egf;Fbxo32;Foxo6;Prkab2;Prkag3;Rag2;Slc2a4;Tnfsf10	rno04068
rno04070	Phosphatidylinositol signaling system	Environmental Information Processing	Signal transduction	8	425	97	7679	0.16769	0.465673	1.49016	Cds2;Dgkb;Dgkg;Dgki;Itpk1;Itpkb;Itpr1;Mtmr7	rno04070
rno04071	Sphingolipid signaling pathway	Environmental Information Processing	Signal transduction	2	425	119	7679	0.991255	1	0.303668	Cers4;Sptlc3	rno04071
rno04072	Phospholipase D signaling pathway	Environmental Information Processing	Signal transduction	13	425	146	7679	0.0603787	0.280032	1.60882	Adcy1;Adcy5;Adcy9;Agpat4;Avpr1a;Dgkb;Dgkg;Dgki;Egf;Grm3;Grm6;Lpar3;Plpp3	rno04072
rno04080	Neuroactive ligand-receptor interaction	Environmental Information Processing	Signaling molecules and interaction	46	425	313	7679	6.76696e-10	1.27772e-07	2.6554	Adcyap1r1;Adora2b;Adra1a;Adra1b;Adrb3;Avpr1a;Chrna7;Chrnb3;Chrne;Cnr1;Glrb;Gria2;Grik2;Grik3;Grik5;Grin2c;Grin3a;Grm3;Grm6;Hcrtr1;Hcrtr2;Htr1d;Lep;Lepr;Lpar3;Mchr1;Nmbr;Nmu;Nmur2;Npff;Npy1r;Ntsr1;Oxtr;P2rx1;P2rx2;P2rx6;P2ry4;Prlr;Sstr1;Taar4;Tacr2;Tacr3;Thra;Thrb;Trpv1;Tshb	rno04080
rno04110	Cell cycle	Cellular Processes	Cell growth and death	3	425	123	7679	0.970054	1	0.440689	Cdkn1c;Tfdp2;Wee2	rno04110
rno04114	Oocyte meiosis	Cellular Processes	Cell growth and death	8	425	112	7679	0.279564	0.696323	1.29059	Adcy1;Adcy5;Adcy9;Ar;Cpeb3;Itpr1;Ppp3r2;Rps6ka2	rno04114
rno04115	p53 signaling pathway	Cellular Processes	Cell growth and death	2	425	66	7679	0.887484	1	0.547522	Adgrb1;Igfbp3	rno04115
rno04120	Ubiquitin mediated proteolysis	Genetic Information Processing	Folding, sorting and degradation	2	425	132	7679	0.995479	1	0.273761	Park2;Wwp1	rno04120
rno04137	Mitophagy - animal	Cellular Processes	Transport and catabolism	1	425	63	7679	0.97273	1	0.286797	Park2	rno04137
rno04140	Autophagy - animal	Cellular Processes	Transport and catabolism	4	425	129	7679	0.932375	1	0.560255	Atg16l2;Itpr1;Prap1;Rragd	rno04140
rno04141	Protein processing in endoplasmic reticulum	Genetic Information Processing	Folding, sorting and degradation	4	425	160	7679	0.980056	1	0.451706	Hspa2;Park2;Sec31b;Svip	rno04141
rno04142	Lysosome	Cellular Processes	Transport and catabolism	2	425	125	7679	0.993543	1	0.289092	Ap3b2;Atp6v0d2	rno04142
rno04144	Endocytosis	Cellular Processes	Transport and catabolism	8	425	256	7679	0.976086	1	0.564632	Agap2;Hspa2;Pard6a;Psd2;Rab11fip4;Sh3gl2;Wipf3;Wwp1	rno04144
rno04145	Phagosome	Cellular Processes	Transport and catabolism	4	425	169	7679	0.986274	1	0.427651	Atp6v0d2;Atp6v1b1;Atp6v1g2;Cd209e	rno04145
rno04146	Peroxisome	Cellular Processes	Transport and catabolism	7	425	81	7679	0.160116	0.465673	1.56145	Abcd2;Acox2;Acsl6;Far2;Idh2;Pex5l;Pxmp2	rno04146
rno04150	mTOR signaling pathway	Environmental Information Processing	Signal transduction	8	425	150	7679	0.594996	1	0.963639	Atp6v1b1;Atp6v1g2;Fzd3;Lpin1;Rps6ka2;Rragd;Wnt10b;Wnt11	rno04150
rno04151	PI3K-Akt signaling pathway	Environmental Information Processing	Signal transduction	6	425	335	7679	0.999873	1	0.32361	Col4a6;Egf;Lpar3;Ntf3;Ntrk2;Prlr	rno04151
rno04152	AMPK signaling pathway	Environmental Information Processing	Signal transduction	9	425	123	7679	0.240493	0.610309	1.32207	Acacb;Adra1a;Lep;Lepr;Ppargc1a;Prkab2;Prkag3;Scd;Slc2a4	rno04152
rno04210	Apoptosis	Cellular Processes	Cell growth and death	2	425	134	7679	0.995919	1	0.269675	Itpr1;Tnfsf10	rno04210
rno04211	Longevity regulating pathway - mammal	Organismal Systems	Aging	7	425	89	7679	0.221576	0.583485	1.4211	Adcy1;Adcy5;Adcy9;Camk4;Ppargc1a;Prkab2;Prkag3	rno04211
rno04213	Longevity regulating pathway - multiple species	Organismal Systems	Aging	6	425	62	7679	0.126809	0.427821	1.74854	Adcy1;Adcy5;Adcy9;Hspa2;Prkab2;Prkag3	rno04213
rno04216	Ferroptosis	Cellular Processes	Cell growth and death	1	425	39	7679	0.892061	1	0.463288	Acsl6	rno04216
rno04217	Necroptosis	Cellular Processes	Cell growth and death	3	425	145	7679	0.988767	1	0.373826	Pygb;Pygm;Tnfsf10	rno04217
rno04218	Cellular senescence	Cellular Processes	Cell growth and death	3	425	173	7679	0.996953	1	0.313322	Igfbp3;Itpr1;Ppp3r2	rno04218
rno04260	Cardiac muscle contraction	Organismal Systems	Circulatory system	8	425	75	7679	0.0543821	0.256646	1.92728	Atp1a2;Atp1a4;Atp1b2;Cacna2d3;Cacnb2;Cacnb4;Myh6;Tnnt2	rno04260
rno04261	Adrenergic signaling in cardiomyocytes	Organismal Systems	Circulatory system	18	425	143	7679	0.000867839	0.0155632	2.27432	Adcy1;Adcy5;Adcy9;Adra1a;Adra1b;Atp1a2;Atp1a4;Atp1b2;Atp2b4;Cacna2d3;Cacnb2;Cacnb4;Myh6;Pln;Ppp1r1a;Scn4b;Scn7a;Tnnt2	rno04261
rno04270	Vascular smooth muscle contraction	Organismal Systems	Circulatory system	19	425	130	7679	8.81405e-05	0.00296373	2.64074	Adcy1;Adcy5;Adcy9;Adora2b;Adra1a;Adra1b;Avpr1a;Gucy1a3;Itpr1;Kcnma1;Kcnmb2;Kcnmb4;Mrvi1;Mylk;Pla2g2a;Pla2g5;Ppp1r12a;Ppp1r12b;Ppp1r14a	rno04270
rno04310	Wnt signaling pathway	Environmental Information Processing	Signal transduction	13	425	143	7679	0.0527647	0.256646	1.64257	Apc2;Bambi;Frat1;Frat2;Fzd3;Nkd1;Nkd2;Notum;Ppp3r2;Sfrp2;Sfrp5;Wnt10b;Wnt11	rno04310
rno04330	Notch signaling pathway	Environmental Information Processing	Signal transduction	1	425	50	7679	0.942513	1	0.361365	Dtx1	rno04330
rno04340	Hedgehog signaling pathway	Environmental Information Processing	Signal transduction	1	425	43	7679	0.914152	1	0.420192	Ihh	rno04340
rno04350	TGF-beta signaling pathway	Environmental Information Processing	Signal transduction	10	425	84	7679	0.0170445	0.130999	2.15098	Acvr1c;Acvr2b;Bambi;Bmp8a;Bmp8b;Gdf7;Id2;Id4;Pitx2;Smad9	rno04350
rno04360	Axon guidance	Organismal Systems	Development and regeneration	20	425	175	7679	0.00155311	0.0232104	2.06494	Ablim2;Dcc;Efnb3;Epha5;Ephb6;Fzd3;Gdf7;L1cam;Ntn1;Ntng1;Pak3;Pard6a;Plxnb3;Ppp3r2;Sema3a;Sema3e;Sema5a;Sema6c;Trpc5;Unc5d	rno04360
rno04370	VEGF signaling pathway	Environmental Information Processing	Signal transduction	1	425	57	7679	0.96152	1	0.316987	Ppp3r2	rno04370
rno04371	Apelin signaling pathway	Environmental Information Processing	Signal transduction	13	425	134	7679	0.0339315	0.194204	1.75289	Adcy1;Adcy5;Adcy9;Camk4;Itpr1;Mef2b;Mylk;Plin1;Ppargc1a;Prkab2;Prkag3;Ryr3;Slc8a2	rno04371
rno04380	Osteoclast differentiation	Organismal Systems	Development and regeneration	2	425	122	7679	0.992483	1	0.296201	Camk4;Ppp3r2	rno04380
rno04390	Hippo signaling pathway	Environmental Information Processing	Signal transduction	12	425	152	7679	0.135609	0.439505	1.42644	Apc2;Bmp8a;Bmp8b;Ctnna3;Dlg2;Fzd3;Gdf7;Id2;Nkd1;Pard6a;Wnt10b;Wnt11	rno04390
rno04392	Hippo signaling pathway - multiple species	Environmental Information Processing	Signal transduction	2	425	28	7679	0.464112	1	1.29059	Dchs2;Rassf2	rno04392
rno04510	Focal adhesion	Cellular Processes	Cellular community - eukaryotes	7	425	196	7679	0.923506	1	0.645294	Col4a6;Egf;Myl7;Mylk;Pak3;Ppp1r12a;Ppp1r12b	rno04510
rno04512	ECM-receptor interaction	Environmental Information Processing	Signaling molecules and interaction	2	425	82	7679	0.946411	1	0.440689	Col4a6;Gp1ba	rno04512
rno04514	Cell adhesion molecules (CAMs)	Environmental Information Processing	Signaling molecules and interaction	12	425	155	7679	0.14983	0.458002	1.39883	Cadm3;Cdh4;Cldn1;Cldn23;Cntn1;Cntnap2;L1cam;Mpz;Ncam2;Negr1;Nrxn2;Ntng1	rno04514
rno04520	Adherens junction	Cellular Processes	Cellular community - eukaryotes	1	425	71	7679	0.982778	1	0.254482	Ctnna3	rno04520
rno04530	Tight junction	Cellular Processes	Cellular community - eukaryotes	8	425	165	7679	0.700875	1	0.876036	Actr3b;Bves;Cldn1;Cldn23;Dlg2;Pard6a;Prkab2;Prkag3	rno04530
rno04540	Gap junction	Cellular Processes	Cellular community - eukaryotes	6	425	86	7679	0.340403	0.817575	1.26057	Adcy1;Adcy5;Adcy9;Egf;Gucy1a3;Itpr1	rno04540
rno04550	Signaling pathways regulating pluripotency of stem cells	Cellular Processes	Cellular community - eukaryotes	11	425	135	7679	0.127233	0.427821	1.47223	Acvr1c;Acvr2b;Apc2;Fzd3;Hand1;Id2;Id4;Lifr;Smad9;Wnt10b;Wnt11	rno04550
rno04610	Complement and coagulation cascades	Organismal Systems	Immune system	1	425	80	7679	0.989737	1	0.225853	C6	rno04610
rno04611	Platelet activation	Organismal Systems	Immune system	10	425	124	7679	0.148142	0.458002	1.45712	Adcy1;Adcy5;Adcy9;Gp1ba;Gucy1a3;Itpr1;Mylk;P2rx1;Ppp1r12a;Rasgrp2	rno04611
rno04612	Antigen processing and presentation	Organismal Systems	Immune system	2	425	78	7679	0.935298	1	0.463288	Hspa2;Rfxapl1	rno04612
rno04614	Renin-angiotensin system	Organismal Systems	Endocrine system	1	425	35	7679	0.864302	1	0.516235	Mrgprd	rno04614
rno04620	Toll-like receptor signaling pathway	Organismal Systems	Immune system	1	425	91	7679	0.994553	1	0.198552	Il12a	rno04620
rno04621	NOD-like receptor signaling pathway	Organismal Systems	Immune system	2	425	154	7679	0.998549	1	0.234652	Itpr1;Nod2	rno04621
rno04622	RIG-I-like receptor signaling pathway	Organismal Systems	Immune system	1	425	60	7679	0.967605	1	0.301137	Il12a	rno04622
rno04625	C-type lectin receptor signaling pathway	Organismal Systems	Immune system	5	425	108	7679	0.721362	1	0.836492	Cd209e;Il12a;Il17d;Itpr1;Ppp3r2	rno04625
rno04630	Jak-STAT signaling pathway	Environmental Information Processing	Signal transduction	11	425	151	7679	0.214118	0.570276	1.31623	Aox1;Aox3;Cntfr;Egf;Il11ra1;Il12a;Il17d;Lep;Lepr;Lifr;Prlr	rno04630
rno04640	Hematopoietic cell lineage	Organismal Systems	Immune system	2	425	87	7679	0.957761	1	0.415362	Gp1ba;Il11ra1	rno04640
rno04650	Natural killer cell mediated cytotoxicity	Organismal Systems	Immune system	2	425	125	7679	0.993543	1	0.289092	Ppp3r2;Tnfsf10	rno04650
rno04657	IL-17 signaling pathway	Organismal Systems	Immune system	1	425	91	7679	0.994553	1	0.198552	Il17d	rno04657
rno04658	Th1 and Th2 cell differentiation	Organismal Systems	Immune system	2	425	88	7679	0.959737	1	0.410642	Il12a;Ppp3r2	rno04658
rno04659	Th17 cell differentiation	Organismal Systems	Immune system	4	425	102	7679	0.823987	1	0.708558	Foxp3;Il17d;Ppp3r2;Rxrg	rno04659
rno04660	T cell receptor signaling pathway	Organismal Systems	Immune system	3	425	101	7679	0.924186	1	0.53668	Grap2;Pak3;Ppp3r2	rno04660
rno04662	B cell receptor signaling pathway	Organismal Systems	Immune system	1	425	70	7679	0.981759	1	0.258118	Ppp3r2	rno04662
rno04666	Fc gamma R-mediated phagocytosis	Organismal Systems	Immune system	2	425	85	7679	0.953528	1	0.425135	Gsn;Plpp3	rno04666
rno04668	TNF signaling pathway	Environmental Information Processing	Signal transduction	1	425	106	7679	0.997707	1	0.170455	Nod2	rno04668
rno04670	Leukocyte transendothelial migration	Organismal Systems	Immune system	4	425	113	7679	0.879071	1	0.639584	Cldn1;Cldn23;Ctnna3;Myl7	rno04670
rno04672	Intestinal immune network for IgA production	Organismal Systems	Immune system	2	425	42	7679	0.684125	1	0.860392	Ccr10;Tnfrsf17	rno04672
rno04710	Circadian rhythm	Organismal Systems	Environmental adaptation	4	425	30	7679	0.0813533	0.347366	2.4091	Npas2;Nr1d1;Prkab2;Prkag3	rno04710
rno04713	Circadian entrainment	Organismal Systems	Environmental adaptation	14	425	96	7679	0.00075346	0.0144772	2.63495	Adcy1;Adcy5;Adcy9;Adcyap1r1;Cacna1h;Cacna1i;Gnao1;Gria2;Grin2c;Gucy1a3;Itpr1;Kcnj5;Kcnj9;Ryr3	rno04713
rno04714	Thermogenesis	Organismal Systems	Environmental adaptation	17	425	214	7679	0.0839836	0.352994	1.43533	Acsl6;Adcy1;Adcy5;Adcy9;Adrb3;Bmp8a;Bmp8b;Cnr1;Cox20;Dpf3;Plin1;Pnpla2;Ppargc1a;Prkab2;Prkag3;Rps6ka2;Slc25a29	rno04714
rno04720	Long-term potentiation	Organismal Systems	Nervous system	8	425	66	7679	0.028329	0.177221	2.19009	Adcy1;Camk4;Gria2;Grin2c;Itpr1;Ppp1r1a;Ppp3r2;Rps6ka2	rno04720
rno04721	Synaptic vesicle cycle	Organismal Systems	Nervous system	8	425	62	7679	0.0201719	0.143475	2.33139	Atp6v0d2;Atp6v1b1;Atp6v1g2;Cacna1a;Cacna1b;Cplx1;Rims1;Syt1	rno04721
rno04722	Neurotrophin signaling pathway	Organismal Systems	Nervous system	5	425	119	7679	0.795885	1	0.75917	Camk4;Ntf3;Ntrk2;Ntrk3;Rps6ka2	rno04722
rno04723	Retrograde endocannabinoid signaling	Organismal Systems	Nervous system	12	425	138	7679	0.0797305	0.345928	1.57115	Adcy1;Adcy5;Adcy9;Cacna1a;Cacna1b;Cnr1;Gnao1;Gria2;Itpr1;Kcnj5;Kcnj9;Rims1	rno04723
rno04724	Glutamatergic synapse	Organismal Systems	Nervous system	16	425	112	7679	0.000409465	0.00917884	2.58118	Adcy1;Adcy5;Adcy9;Cacna1a;Gnao1;Gria2;Grik2;Grik3;Grik5;Grin2c;Grin3a;Grm3;Grm6;Itpr1;Ppp3r2;Shank2	rno04724
rno04725	Cholinergic synapse	Organismal Systems	Nervous system	12	425	111	7679	0.0193356	0.143475	1.95332	Adcy1;Adcy5;Adcy9;Cacna1a;Cacna1b;Camk4;Chrna7;Gnao1;Itpr1;Kcnj12;Kcnq4;Kcnq5	rno04725
rno04726	Serotonergic synapse	Organismal Systems	Nervous system	17	425	119	7679	0.000272204	0.00665663	2.58118	Adcy5;Alox12;Cacna1a;Cacna1b;Cyp2c23;Cyp2d4;Cyp2j3;Cyp2j4;Ddc;Gnao1;Htr1d;Itpr1;Kcnj5;Kcnj9;Kcnn2;Maoa;Maob	rno04726
rno04727	GABAergic synapse	Organismal Systems	Nervous system	9	425	87	7679	0.0504517	0.251324	1.86913	Abat;Adcy1;Adcy5;Adcy9;Cacna1a;Cacna1b;Gnao1;Slc6a1;Slc6a13	rno04727
rno04728	Dopaminergic synapse	Organismal Systems	Nervous system	11	425	129	7679	0.10075	0.38283	1.5407	Adcy5;Cacna1a;Cacna1b;Ddc;Gnao1;Gria2;Itpr1;Kcnj5;Kcnj9;Maoa;Maob	rno04728
rno04730	Long-term depression	Organismal Systems	Nervous system	6	425	60	7679	0.112927	0.405033	1.80682	Cacna1a;Gnao1;Gnaz;Gria2;Gucy1a3;Itpr1	rno04730
rno04740	Olfactory transduction	Organismal Systems	Sensory system	8	425	1088	7679	1	1	0.132855	Cnga3;Ncald;Olr1375;Olr1592;Pde1b;Pde2a;Rgs2;Slc8a2	rno04740
rno04742	Taste transduction	Organismal Systems	Sensory system	9	425	86	7679	0.0474406	0.245414	1.89086	Asic2;Cacna1a;Htr1d;P2rx2;P2ry4;Pde1b;Scn9a;Scnn1b;Scnn1g	rno04742
rno04744	Phototransduction	Organismal Systems	Sensory system	1	425	26	7679	0.773005	1	0.694932	Rgs9	rno04744
rno04750	Inflammatory mediator regulation of TRP channels	Organismal Systems	Sensory system	11	425	111	7679	0.0427159	0.239387	1.79055	Adcy1;Adcy5;Adcy9;Alox12;Asic2;Asic4;Cyp2c23;Cyp2j3;Cyp2j4;Itpr1;Trpv1	rno04750
rno04810	Regulation of actin cytoskeleton	Cellular Processes	Cell motility	9	425	208	7679	0.821594	1	0.781799	Apc2;Egf;Gsn;Myl7;Mylk;Pak3;Ppp1r12a;Ppp1r12b;Spata13	rno04810
rno04910	Insulin signaling pathway	Organismal Systems	Endocrine system	12	425	134	7679	0.0669984	0.304402	1.61805	Acacb;Exoc7;Phkg1;Ppargc1a;Ppp1r3a;Ppp1r3b;Ppp1r3e;Prkab2;Prkag3;Pygb;Pygm;Slc2a4	rno04910
rno04911	Insulin secretion	Organismal Systems	Endocrine system	14	425	85	7679	0.000208759	0.0056156	2.97594	Adcy1;Adcy5;Adcy9;Adcyap1r1;Atp1a2;Atp1a4;Atp1b2;Kcnma1;Kcnmb2;Kcnmb4;Kcnn1;Kcnn2;Kcnn3;Pclo	rno04911
rno04912	GnRH signaling pathway	Organismal Systems	Endocrine system	4	425	89	7679	0.733917	1	0.812056	Adcy1;Adcy5;Adcy9;Itpr1	rno04912
rno04913	Ovarian Steroidogenesis	Organismal Systems	Endocrine system	7	425	51	7679	0.021265	0.144545	2.47995	Adcy1;Adcy5;Adcy9;Bmp15;Cyp11a1;Cyp2j3;Cyp2j4	rno04913
rno04914	Progesterone-mediated oocyte maturation	Organismal Systems	Endocrine system	5	425	88	7679	0.541821	1	1.0266	Adcy1;Adcy5;Adcy9;Cpeb3;Rps6ka2	rno04914
rno04915	Estrogen signaling pathway	Organismal Systems	Endocrine system	11	425	130	7679	0.104916	0.386608	1.52885	Adcy1;Adcy5;Adcy9;Gnao1;Hspa2;Itpr1;Ka11;Kcnj5;Kcnj9;Krt20;Tff1	rno04915
rno04916	Melanogenesis	Organismal Systems	Endocrine system	8	425	98	7679	0.174426	0.478782	1.47496	Adcy1;Adcy5;Adcy9;Dct;Fzd3;Gnao1;Wnt10b;Wnt11	rno04916
rno04917	Prolactin signaling pathway	Organismal Systems	Endocrine system	2	425	72	7679	0.914471	1	0.501895	Elf5;Prlr	rno04917
rno04918	Thyroid hormone synthesis	Organismal Systems	Endocrine system	10	425	72	7679	0.005951	0.0668927	2.50948	Adcy1;Adcy5;Adcy9;Atp1a2;Atp1a4;Atp1b2;Itpr1;Slc5a5;Tshb;Ttr	rno04918
rno04919	Thyroid hormone signaling pathway	Organismal Systems	Endocrine system	10	425	117	7679	0.112703	0.405033	1.54429	Atp1a2;Atp1a4;Atp1b2;Myh6;Pln;Rcan2;Rxrg;Slc16a10;Thra;Thrb	rno04919
rno04920	Adipocytokine signaling pathway	Organismal Systems	Endocrine system	9	425	71	7679	0.0157835	0.12866	2.29034	Acacb;Acsl6;Lep;Lepr;Ppargc1a;Prkab2;Prkag3;Rxrg;Slc2a4	rno04920
rno04921	Oxytocin signaling pathway	Organismal Systems	Endocrine system	22	425	152	7679	2.888e-05	0.00155374	2.61514	Adcy1;Adcy5;Adcy9;Cacna2d3;Cacnb2;Cacnb4;Camk4;Gnao1;Gucy1a3;Itpr1;Kcnj12;Kcnj5;Kcnj9;Mylk;Oxtr;Ppp1r12a;Ppp1r12b;Ppp3r2;Prkab2;Prkag3;Rgs2;Ryr3	rno04921
rno04922	Glucagon signaling pathway	Organismal Systems	Endocrine system	9	425	100	7679	0.101114	0.38283	1.62614	Acacb;Itpr1;Phkg1;Ppargc1a;Ppp3r2;Prkab2;Prkag3;Pygb;Pygm	rno04922
rno04923	Regulation of lipolysis in adipocyte	Organismal Systems	Endocrine system	8	425	55	7679	0.0101519	0.0972938	2.62811	Adcy1;Adcy5;Adcy9;Adrb3;Npy1r;Plin1;Pnpla2;Tshb	rno04923
rno04924	Renin secretion	Organismal Systems	Endocrine system	9	425	68	7679	0.0120745	0.104775	2.39138	Adcy5;Adcyap1r1;Adrb3;Gucy1a3;Itpr1;Kcnma1;Pde1b;Pde3a;Ppp3r2	rno04924
rno04925	Aldosterone synthesis and secretion	Organismal Systems	Endocrine system	16	425	94	7679	4.94519e-05	0.00190037	3.07544	Adcy1;Adcy5;Adcy9;Atp1a2;Atp1a4;Atp1b2;Atp2b4;Cacna1h;Cacna1i;Camk4;Cyp11a1;Cyp21a1;Itpr1;Kcnj5;Pde2a;Prkd1	rno04925
rno04926	Relaxin signaling pathway	Organismal Systems	Endocrine system	5	425	126	7679	0.834563	1	0.716993	Adcy1;Adcy5;Adcy9;Col4a6;Gnao1	rno04926
rno04927	Cortisol synthesis and secretion	Organismal Systems	Endocrine system	8	425	63	7679	0.0220311	0.144545	2.29438	Adcy1;Adcy5;Adcy9;Cacna1h;Cacna1i;Cyp11a1;Cyp21a1;Itpr1	rno04927
rno04930	Type II diabetes mellitus	Human Diseases	Endocrine and metabolic disease	3	425	47	7679	0.48661	1	1.15329	Cacna1a;Cacna1b;Slc2a4	rno04930
rno04931	Insulin resistance	Human Diseases	Endocrine and metabolic disease	14	425	108	7679	0.00240195	0.0323062	2.34218	Acacb;Ppargc1a;Ppargc1b;Ppp1r3a;Ppp1r3b;Ppp1r3e;Prkab2;Prkag3;Pygb;Pygm;Rps6ka2;Slc27a5;Slc27a6;Slc2a4	rno04931
rno04932	Non-alcoholic fatty liver disease (NAFLD)	Human Diseases	Endocrine and metabolic disease	5	425	145	7679	0.910251	1	0.623043	Cyp2e1;Lep;Lepr;Prkab2;Prkag3	rno04932
rno04933	AGE-RAGE signaling pathway in diabetic complications	Human Diseases	Endocrine and metabolic disease	1	425	99	7679	0.996566	1	0.182507	Col4a6	rno04933
rno04934	Cushing's syndrome	Human Diseases	Endocrine and metabolic disease	12	425	153	7679	0.140264	0.447728	1.41712	Adcy1;Adcy5;Adcy9;Apc2;Cacna1h;Cacna1i;Cyp11a1;Cyp21a1;Fzd3;Itpr1;Wnt10b;Wnt11	rno04934
rno04940	Type I diabetes mellitus	Human Diseases	Endocrine and metabolic disease	1	425	60	7679	0.967605	1	0.301137	Il12a	rno04940
rno04950	Maturity onset diabetes of the young	Human Diseases	Endocrine and metabolic disease	2	425	27	7679	0.445253	0.989859	1.33839	Foxa3;Iapp	rno04950
rno04960	Aldosterone-regulated sodium reabsorption	Organismal Systems	Excretory system	6	425	38	7679	0.016963	0.130999	2.85288	Atp1a2;Atp1a4;Atp1b2;Nr3c2;Scnn1b;Scnn1g	rno04960
rno04961	Endocrine and other factor-regulated calcium reabsorption	Organismal Systems	Excretory system	4	425	52	7679	0.324463	0.786312	1.38986	Adcy9;Atp1a2;Atp1a4;Atp1b2	rno04961
rno04962	Vasopressin-regulated water reabsorption	Organismal Systems	Excretory system	1	425	42	7679	0.909093	1	0.430196	Adcy9	rno04962
rno04964	Proximal tubule bicarbonate reclamation	Organismal Systems	Excretory system	3	425	22	7679	0.119057	0.415927	2.46385	Atp1a2;Atp1a4;Atp1b2	rno04964
rno04966	Collecting duct acid secretion	Organismal Systems	Excretory system	3	425	27	7679	0.185735	0.504673	2.00758	Atp6v0d2;Atp6v1b1;Atp6v1g2	rno04966
rno04970	Salivary secretion	Organismal Systems	Digestive system	16	425	76	7679	2.93111e-06	0.000197117	3.80384	Adcy1;Adcy5;Adcy9;Adra1a;Adra1b;Adrb3;Atp1a2;Atp1a4;Atp1b2;Atp2b4;Cst3;Gucy1a3;Itpr1;Kcnma1;Ryr3;Trpv6	rno04970
rno04971	Gastric acid secretion	Organismal Systems	Digestive system	9	425	74	7679	0.0202679	0.143475	2.19749	Adcy1;Adcy5;Adcy9;Atp1a2;Atp1a4;Atp1b2;Itpr1;Kcne2;Mylk	rno04971
rno04972	Pancreatic secretion	Organismal Systems	Digestive system	13	425	98	7679	0.00276285	0.0353909	2.39681	Adcy1;Adcy5;Adcy9;Atp1a2;Atp1a4;Atp1b2;Atp2a3;Atp2b4;Cel;Itpr1;Kcnma1;Pla2g2a;Pla2g5	rno04972
rno04973	Carbohydrate digestion and absorption	Organismal Systems	Digestive system	4	425	39	7679	0.167337	0.465673	1.85315	Atp1a2;Atp1a4;Atp1b2;Slc5a1	rno04973
rno04974	Protein digestion and absorption	Organismal Systems	Digestive system	9	425	87	7679	0.0504517	0.251324	1.86913	Atp1a2;Atp1a4;Atp1b2;Col11a2;Col22a1;Col4a6;Slc16a10;Slc8a2;Xpnpep2	rno04974
rno04975	Fat digestion and absorption	Organismal Systems	Digestive system	5	425	40	7679	0.0678963	0.304402	2.25853	Apob;Cel;Pla2g2a;Pla2g5;Plpp3	rno04975
rno04976	Bile secretion	Organismal Systems	Digestive system	12	425	71	7679	0.000459587	0.00950992	3.05379	Abcb1a;Adcy1;Adcy5;Adcy9;Atp1a2;Atp1a4;Atp1b2;Kcnn2;Slc27a5;Slc5a1;Slco1a2;Slco1a5	rno04976
rno04977	Vitamin digestion and absorption	Organismal Systems	Digestive system	3	425	24	7679	0.144568	0.452196	2.25853	Apob;Awat2;Folh1	rno04977
rno04978	Mineral absorption	Organismal Systems	Digestive system	5	425	43	7679	0.0870223	0.360139	2.10096	Atp1a2;Atp1a4;Atp1b2;Slc5a1;Trpv6	rno04978
rno04979	Cholesterol metabolism	Organismal Systems	Digestive system	1	425	49	7679	0.939122	1	0.368739	Apob	rno04979
rno05010	Alzheimer's disease	Human Diseases	Neurodegenerative disease	6	425	164	7679	0.898096	1	0.661033	Apbb1;Atp2a3;Grin2c;Itpr1;Ppp3r2;Ryr3	rno05010
rno05012	Parkinson's disease	Human Diseases	Neurodegenerative disease	2	425	127	7679	0.994166	1	0.284539	Adcy5;Park2	rno05012
rno05014	Amyotrophic lateral sclerosis (ALS)	Human Diseases	Neurodegenerative disease	5	425	53	7679	0.167919	0.465673	1.70455	Gria2;Grin2c;Nefl;Ppp3r2;Prph	rno05014
rno05016	Huntington's disease	Human Diseases	Neurodegenerative disease	6	425	181	7679	0.94093	1	0.598947	Dnah2;Dnah7;Dnah9;Dnai1;Itpr1;Ppargc1a	rno05016
rno05020	Prion diseases	Human Diseases	Neurodegenerative disease	2	425	34	7679	0.568784	1	1.06284	C6;Ncam2	rno05020
rno05030	Cocaine addiction	Human Diseases	Substance dependence	9	425	47	7679	0.000929771	0.0156318	3.45987	Adcy5;Ddc;Gria2;Grin2c;Grin3a;Grm3;Maoa;Maob;Rgs9	rno05030
rno05031	Amphetamine addiction	Human Diseases	Substance dependence	9	425	66	7679	0.00999178	0.0972938	2.46385	Adcy5;Camk4;Ddc;Gria2;Grin2c;Grin3a;Maoa;Maob;Ppp3r2	rno05031
rno05032	Morphine addiction	Human Diseases	Substance dependence	11	425	90	7679	0.0104889	0.0972938	2.20834	Adcy1;Adcy5;Adcy9;Cacna1a;Cacna1b;Gnao1;Kcnj5;Kcnj9;Pde1b;Pde2a;Pde3a	rno05032
rno05033	Nicotine addiction	Human Diseases	Substance dependence	6	425	40	7679	0.0215026	0.144545	2.71024	Cacna1a;Cacna1b;Chrna7;Gria2;Grin2c;Grin3a	rno05033
rno05034	Alcoholism	Human Diseases	Substance dependence	11	425	143	7679	0.167901	0.465673	1.38986	Adcy5;Adora2b;Camk4;Ddc;Gnao1;Grin2c;Grin3a;Hdac11;Maoa;Maob;Ntrk2	rno05034
rno05100	Bacterial invasion of epithelial cells	Human Diseases	Infectious disease: bacterial	3	425	75	7679	0.792853	1	0.722729	Arhgef26;Ctnna3;Sept6	rno05100
rno05133	Pertussis	Human Diseases	Infectious disease: bacterial	1	425	72	7679	0.98374	1	0.250948	Il12a	rno05133
rno05134	Legionellosis	Human Diseases	Infectious disease: bacterial	2	425	53	7679	0.80021	1	0.68182	Hspa2;Il12a	rno05134
rno05140	Leishmaniasis	Human Diseases	Infectious disease: parasitic	1	425	65	7679	0.975689	1	0.277973	Il12a	rno05140
rno05142	Chagas disease (American trypanosomiasis)	Human Diseases	Infectious disease: parasitic	4	425	101	7679	0.818078	1	0.715574	Adcy1;Gna14;Gnao1;Il12a	rno05142
rno05143	African trypanosomiasis	Human Diseases	Infectious disease: parasitic	1	425	34	7679	0.856314	1	0.531419	Il12a	rno05143
rno05144	Malaria	Human Diseases	Infectious disease: parasitic	1	425	52	7679	0.94874	1	0.347466	Il12a	rno05144
rno05145	Toxoplasmosis	Human Diseases	Infectious disease: parasitic	3	425	107	7679	0.940797	1	0.506586	Gnao1;Hspa2;Il12a	rno05145
rno05146	Amoebiasis	Human Diseases	Infectious disease: parasitic	4	425	96	7679	0.78606	1	0.752843	Adcy1;Col4a6;Gna14;Il12a	rno05146
rno05152	Tuberculosis	Human Diseases	Infectious disease: bacterial	6	425	169	7679	0.912853	1	0.641476	Atp6v0d2;Cd209e;Il12a;Nod2;Ppp3r2;Rfxapl1	rno05152
rno05160	Hepatitis C	Human Diseases	Infectious disease: viral	3	425	122	7679	0.968724	1	0.444301	Cldn1;Cldn23;Egf	rno05160
rno05162	Measles	Human Diseases	Infectious disease: viral	4	425	125	7679	0.92152	1	0.578184	Cd209e;Hspa2;Il12a;Tnfsf10	rno05162
rno05164	Influenza A	Human Diseases	Infectious disease: viral	3	425	158	7679	0.993828	1	0.343068	Hspa2;Il12a;Tnfsf10	rno05164
rno05165	Human papillomavirus infection	Human Diseases	Infectious disease: viral	9	425	327	7679	0.995122	1	0.497291	Apc2;Col4a6;Dlg2;Egf;Fzd3;Hdac11;Pard6a;Wnt10b;Wnt11	rno05165
rno05166	HTLV-I infection	Human Diseases	Infectious disease: viral	8	425	269	7679	0.984533	1	0.537345	Adcy1;Adcy5;Adcy9;Apc2;Fzd3;Ppp3r2;Wnt10b;Wnt11	rno05166
rno05167	Kaposi's sarcoma-associated herpesvirus infection	Human Diseases	Infectious disease: viral	2	425	194	7679	0.999825	1	0.18627	Itpr1;Ppp3r2	rno05167
rno05168	Herpes simplex infection	Human Diseases	Infectious disease: viral	1	425	190	7679	0.999983	1	0.095096	Il12a	rno05168
rno05169	Epstein-Barr virus infection	Human Diseases	Infectious disease: viral	1	425	204	7679	0.999992	1	0.0885698	Hspa2	rno05169
rno05200	Pathways in cancer	Human Diseases	Cancer: overview	22	425	508	7679	0.91179	1	0.782483	Adcy1;Adcy5;Adcy9;Apc2;Ar;Col4a6;Ctnna3;Dcc;Egf;Egln3;Frat1;Frat2;Fzd3;Gstm7;Il12a;Lpar3;Rasgrp2;Runx1t1;Rxrg;Wnt10b;Wnt11;Zbtb16	rno05200
rno05202	Transcriptional misregulation in cancers	Human Diseases	Cancer: overview	9	425	168	7679	0.589432	1	0.967941	Etv1;Eya1;Hpgd;Id2;Igfbp3;Runx1t1;Rxrg;Ssx1;Zbtb16	rno05202
rno05203	Viral carcinogenesis	Human Diseases	Cancer: overview	4	425	201	7679	0.996561	1	0.359567	Atp6v0d2;Gsn;Gtf2a1l;Hdac11	rno05203
rno05204	Chemical carcinogenesis	Human Diseases	Cancer: overview	9	425	85	7679	0.0445513	0.244578	1.91311	Adh1;Adh4;Chrna7;Cyp2c23;Cyp2e1;Cyp3a18;Gstm7;Sult1a1;Ugt2b1	rno05204
rno05205	Proteoglycans in cancer	Human Diseases	Cancer: overview	10	425	198	7679	0.663876	1	0.912537	Fzd3;Hoxd10;Hpse2;Ihh;Itpr1;Ppp1r12a;Ppp1r12b;Twist1;Wnt10b;Wnt11	rno05205
rno05206	MicroRNAs in cancer	Human Diseases	Cancer: overview	6	425	141	7679	0.800472	1	0.768861	Abcb1a;Apc2;Fzd3;Hoxd10;Igf2bp1;Mmp16	rno05206
rno05210	Colorectal cancer	Human Diseases	Cancer: specific types	3	425	86	7679	0.862597	1	0.630287	Apc2;Dcc;Egf	rno05210
rno05211	Renal cell carcinoma	Human Diseases	Cancer: specific types	2	425	66	7679	0.887484	1	0.547522	Egln3;Pak3	rno05211
rno05212	Pancreatic cancer	Human Diseases	Cancer: specific types	1	425	74	7679	0.985506	1	0.244165	Egf	rno05212
rno05213	Endometrial cancer	Human Diseases	Cancer: specific types	3	425	57	7679	0.618442	1	0.95096	Apc2;Ctnna3;Egf	rno05213
rno05214	Glioma	Human Diseases	Cancer: specific types	1	425	71	7679	0.982778	1	0.254482	Egf	rno05214
rno05215	Prostate cancer	Human Diseases	Cancer: specific types	2	425	96	7679	0.972649	1	0.376422	Ar;Egf	rno05215
rno05216	Thyroid cancer	Human Diseases	Cancer: specific types	1	425	37	7679	0.878973	1	0.488331	Rxrg	rno05216
rno05217	Basal cell carcinoma	Human Diseases	Cancer: specific types	4	425	60	7679	0.426463	0.964021	1.20455	Apc2;Fzd3;Wnt10b;Wnt11	rno05217
rno05218	Melanoma	Human Diseases	Cancer: specific types	1	425	72	7679	0.98374	1	0.250948	Egf	rno05218
rno05219	Bladder cancer	Human Diseases	Cancer: specific types	1	425	40	7679	0.898065	1	0.451706	Egf	rno05219
rno05221	Acute myeloid leukemia	Human Diseases	Cancer: specific types	2	425	66	7679	0.887484	1	0.547522	Runx1t1;Zbtb16	rno05221
rno05222	Small cell lung cancer	Human Diseases	Cancer: specific types	2	425	91	7679	0.965148	1	0.397104	Col4a6;Rxrg	rno05222
rno05223	Non-small cell lung cancer	Human Diseases	Cancer: specific types	2	425	66	7679	0.887484	1	0.547522	Egf;Rxrg	rno05223
rno05224	Breast cancer	Human Diseases	Cancer: specific types	7	425	145	7679	0.699027	1	0.87226	Apc2;Egf;Frat1;Frat2;Fzd3;Wnt10b;Wnt11	rno05224
rno05225	Hepatocellular carcinoma	Human Diseases	Cancer: specific types	8	425	169	7679	0.725877	1	0.855301	Apc2;Dpf3;Frat1;Frat2;Fzd3;Gstm7;Wnt10b;Wnt11	rno05225
rno05226	Gastric cancer	Human Diseases	Cancer: specific types	10	425	147	7679	0.29603	0.723928	1.22913	Abcb1a;Apc2;Ctnna3;Egf;Frat1;Frat2;Fzd3;Rxrg;Wnt10b;Wnt11	rno05226
rno05230	Central carbon metabolism in cancer	Human Diseases	Cancer: overview	1	425	61	7679	0.969412	1	0.296201	Ntrk3	rno05230
rno05231	Choline metabolism in cancer	Human Diseases	Cancer: overview	8	425	97	7679	0.16769	0.465673	1.49016	Chka;Dgkb;Dgkg;Dgki;Egf;Plpp3;Slc22a2;Slc22a3	rno05231
rno05310	Asthma	Human Diseases	Immune disease	1	425	24	7679	0.745532	1	0.752843	Epx	rno05310
rno05320	Autoimmune thyroid disease	Human Diseases	Immune disease	1	425	60	7679	0.967605	1	0.301137	Tshb	rno05320
rno05321	Inflammatiory bowel disease (IBD)	Human Diseases	Immune disease	3	425	59	7679	0.641891	1	0.918724	Foxp3;Il12a;Nod2	rno05321
rno05322	Systemic lupus erythematosus	Human Diseases	Immune disease	1	425	91	7679	0.994553	1	0.198552	C6	rno05322
rno05323	Rheumatoid arthritis	Human Diseases	Immune disease	3	425	81	7679	0.833914	1	0.669194	Atp6v0d2;Atp6v1b1;Atp6v1g2	rno05323
rno05330	Allograft rejection	Human Diseases	Immune disease	1	425	53	7679	0.951597	1	0.34091	Il12a	rno05330
rno05340	Primary immunodeficiency	Human Diseases	Immune disease	2	425	36	7679	0.600238	1	1.00379	Rag2;Rfxapl1	rno05340
rno05410	Hypertrophic cardiomyopathy (HCM)	Human Diseases	Cardiovascular disease	9	425	86	7679	0.0474406	0.245414	1.89086	Cacna2d3;Cacnb2;Cacnb4;Myh6;Prkab2;Prkag3;Sgca;Sgcd;Tnnt2	rno05410
rno05412	Arrhythmogenic right ventricular cardiomyopathy (ARVC)	Human Diseases	Cardiovascular disease	7	425	72	7679	0.102129	0.38283	1.75663	Actn3;Cacna2d3;Cacnb2;Cacnb4;Ctnna3;Sgca;Sgcd	rno05412
rno05414	Dilated cardiomyopathy (DCM)	Human Diseases	Cardiovascular disease	11	425	88	7679	0.00890434	0.0921257	2.25853	Adcy1;Adcy5;Adcy9;Cacna2d3;Cacnb2;Cacnb4;Myh6;Pln;Sgca;Sgcd;Tnnt2	rno05414
rno05416	Viral myocarditis	Human Diseases	Cardiovascular disease	3	425	73	7679	0.777408	1	0.74253	Myh6;Sgca;Sgcd	rno05416
rno05418	Fluid shear stress and atherosclerosis	Human Diseases	Cardiovascular disease	2	425	141	7679	0.997152	1	0.256287	Acvr2b;Gstm7	rno05418

## Sheet: down-regulated(SSCI–2 vs. sham)
id	Term	Classification_level1	Classification_level2	ListHits	ListTotal	PopHits	PopTotal	p-value	q-value	Enrichment_score	Gene	hyperlink_only_excel
rno00010	Glycolysis / Gluconeogenesis	Metabolism	Carbohydrate metabolism	6	444	64	7679	0.163522	0.488262	1.62141	Adh1;Aldh3b2;Eno2;Eno3;Fbp1;Galm	rno00010
rno00030	Pentose phosphate pathway	Metabolism	Carbohydrate metabolism	2	444	29	7679	0.506209	0.968253	1.19276	Fbp1;Rgn	rno00030
rno00051	Fructose and mannose metabolism	Metabolism	Carbohydrate metabolism	1	444	34	7679	0.868599	1	0.508678	Fbp1	rno00051
rno00052	Galactose metabolism	Metabolism	Carbohydrate metabolism	1	444	30	7679	0.833082	1	0.576502	Galm	rno00052
rno00053	Ascorbate and aldarate metabolism	Metabolism	Carbohydrate metabolism	1	444	26	7679	0.787993	1	0.665194	Rgn	rno00053
rno00061	Fatty acid biosynthesis	Metabolism	Lipid metabolism	3	444	13	7679	0.035577	0.155506	3.99116	Acacb;Acsbg2;Acsl6	rno00061
rno00062	Fatty acid elongation	Metabolism	Lipid metabolism	3	444	28	7679	0.218255	0.564671	1.85304	Acot1;Acot4;Elovl4	rno00062
rno00071	Fatty acid degradation	Metabolism	Lipid metabolism	4	444	44	7679	0.248516	0.62359	1.57228	Acadsb;Acsbg2;Acsl6;Adh1	rno00071
rno00100	Steroid biosynthesis	Metabolism	Lipid metabolism	1	444	19	7679	0.677931	1	0.910266	Cel	rno00100
rno00120	Primary bile acid biosynthesis	Metabolism	Lipid metabolism	2	444	16	7679	0.235721	0.597013	2.16188	Cyp39a1;Cyp8b1	rno00120
rno00140	Steroid hormone biosynthesis	Metabolism	Lipid metabolism	7	444	75	7679	0.141491	0.440736	1.6142	Cyp11a1;Cyp21a1;Cyp2d4;Cyp3a18;Hsd11b2;Hsd17b2;Hsd17b3	rno00140
rno00190	Oxidative phosphorylation	Metabolism	Energy metabolism	3	444	119	7679	0.971831	1	0.43601	Atp12a;Atp6v1b1;Atp6v1g2	rno00190
rno00220	Arginine biosynthesis	Metabolism	Amino acid metabolism	1	444	19	7679	0.677931	1	0.910266	Cps1	rno00220
rno00230	Purine metabolism	Metabolism	Nucleotide metabolism	13	444	169	7679	0.178908	0.515789	1.33039	Adcy1;Adcy5;Adcy9;Gmpr;Gucy1a3;Gucy1b3;Gucy2d;Nt5e;Pde1b;Pde1c;Pde2a;Pde3a;Pde5a	rno00230
rno00240	Pyrimidine metabolism	Metabolism	Nucleotide metabolism	2	444	96	7679	0.977915	1	0.360313	Dpyd;Nt5e	rno00240
rno00250	Alanine, aspartate and glutamate metabolism	Metabolism	Amino acid metabolism	3	444	35	7679	0.329831	0.757493	1.48243	Abat;Cps1;Folh1	rno00250
rno00260	Glycine, serine and threonine metabolism	Metabolism	Amino acid metabolism	5	444	38	7679	0.0658827	0.247975	2.27566	Aoc3;Cbs;Dao;Maoa;Maob	rno00260
rno00270	Cysteine and methionine metabolism	Metabolism	Amino acid metabolism	2	444	45	7679	0.743025	1	0.768669	Cbs;Tst	rno00270
rno00280	Valine, leucine and isoleucine degradation	Metabolism	Amino acid metabolism	5	444	53	7679	0.190181	0.525907	1.63161	Abat;Acadsb;Aldh6a1;Aox1;Aox3	rno00280
rno00310	Lysine degradation	Metabolism	Amino acid metabolism	5	444	54	7679	0.200416	0.539165	1.60139	Aass;Bbox1;Colgalt2;Prdm6;Prdm9	rno00310
rno00330	Arginine and proline metabolism	Metabolism	Amino acid metabolism	7	444	48	7679	0.019378	0.116699	2.52219	Carns1;Ckb;Ckm;Dao;Maoa;Maob;Prodh1	rno00330
rno00340	Histidine metabolism	Metabolism	Amino acid metabolism	4	444	23	7679	0.0407159	0.172406	3.00783	Aldh3b2;Carns1;Maoa;Maob	rno00340
rno00350	Tyrosine metabolism	Metabolism	Amino acid metabolism	9	444	38	7679	0.00024106	0.00384278	4.09619	Adh1;Aldh3b2;Aoc3;Aox1;Aox3;Dct;Ddc;Maoa;Maob	rno00350
rno00360	Phenylalanine metabolism	Metabolism	Amino acid metabolism	5	444	20	7679	0.00474842	0.0389946	4.32376	Aldh3b2;Aoc3;Ddc;Maoa;Maob	rno00360
rno00380	Tryptophan metabolism	Metabolism	Amino acid metabolism	7	444	45	7679	0.0138474	0.087271	2.69034	Aox1;Aox3;Ddc;Inmt;Maoa;Maob;Tdo2	rno00380
rno00410	beta-Alanine metabolism	Metabolism	Metabolism of other amino acids	6	444	30	7679	0.00654248	0.0521474	3.45901	Abat;Aldh3b2;Aldh6a1;Aoc3;Carns1;Dpyd	rno00410
rno00450	Selenocompound metabolism	Metabolism	Metabolism of other amino acids	1	444	17	7679	0.637087	1	1.01736	Inmt	rno00450
rno00480	Glutathione metabolism	Metabolism	Metabolism of other amino acids	4	444	58	7679	0.434006	0.904735	1.19276	Gstm7;Nat8;Nat8f3;Nat8f4	rno00480
rno00500	Starch and sucrose metabolism	Metabolism	Carbohydrate metabolism	2	444	29	7679	0.506209	0.968253	1.19276	Agl;Pygm	rno00500
rno00510	N-Glycan biosynthesis	Metabolism	Glycan biosynthesis and metabolism	1	444	48	7679	0.943181	1	0.360313	St6gal2	rno00510
rno00511	Other glycan degradation	Metabolism	Glycan biosynthesis and metabolism	1	444	19	7679	0.677931	1	0.910266	Neu3	rno00511
rno00512	Mucin type O-glycan biosynthesis	Metabolism	Glycan biosynthesis and metabolism	3	444	27	7679	0.202933	0.539165	1.92167	Galnt15;Galnt5;Wbscr17	rno00512
rno00514	Other types of O-glycan biosynthesis	Metabolism	Glycan biosynthesis and metabolism	2	444	22	7679	0.366197	0.805188	1.57228	Colgalt2;St6gal2	rno00514
rno00520	Amino sugar and nucleotide sugar metabolism	Metabolism	Carbohydrate metabolism	2	444	47	7679	0.764551	1	0.735959	Cmah;Cyb5r2	rno00520
rno00531	Glycosaminoglycan degradation	Metabolism	Glycan biosynthesis and metabolism	1	444	20	7679	0.696599	1	0.864752	Hpse2	rno00531
rno00532	Glycosaminoglycan biosynthesis - chondroitin sulfate / dermatan sulfate	Metabolism	Glycan biosynthesis and metabolism	2	444	21	7679	0.34483	0.778741	1.64715	Chst3;Chsy3l	rno00532
rno00534	Glycosaminoglycan biosynthesis - heparan sulfate / heparin	Metabolism	Glycan biosynthesis and metabolism	3	444	25	7679	0.173131	0.504501	2.07541	Extl1;Ndst3;Ndst4	rno00534
rno00561	Glycerolipid metabolism	Metabolism	Lipid metabolism	5	444	61	7679	0.276482	0.675014	1.41763	Cel;Dgkb;Dgkg;Dgki;Pnpla3	rno00561
rno00562	Inositol phosphate metabolism	Metabolism	Carbohydrate metabolism	7	444	73	7679	0.127731	0.422136	1.65843	Aldh6a1;Inpp5b;Itpk1;Itpkb;Mtm1;Mtmr4;Plce1	rno00562
rno00564	Glycerophospholipid metabolism	Metabolism	Lipid metabolism	8	444	96	7679	0.190113	0.525907	1.44125	Cds2;Chka;Dgkb;Dgkg;Dgki;Pla2g2a;Pla2g3;Pla2g5	rno00564
rno00565	Ether lipid metabolism	Metabolism	Lipid metabolism	6	444	45	7679	0.0434542	0.181171	2.30601	Enpp2;Gal3st1;Gdpd3;Pla2g2a;Pla2g3;Pla2g5	rno00565
rno00590	Arachidonic acid metabolism	Metabolism	Lipid metabolism	9	444	77	7679	0.0327153	0.152859	2.0215	Alox12;Alox15b;Cyp2j3;Cyp2j4;Cyp4f1;Pla2g2a;Pla2g3;Pla2g5;Ptgds	rno00590
rno00591	Linoleic acid metabolism	Metabolism	Lipid metabolism	6	444	39	7679	0.0232215	0.128429	2.66078	Cyp2j3;Cyp2j4;Cyp3a18;Pla2g2a;Pla2g3;Pla2g5	rno00591
rno00592	alpha-Linolenic acid metabolism	Metabolism	Lipid metabolism	3	444	23	7679	0.144731	0.445707	2.25588	Pla2g2a;Pla2g3;Pla2g5	rno00592
rno00600	Sphingolipid metabolism	Metabolism	Lipid metabolism	6	444	49	7679	0.0616514	0.242138	2.11776	Acer2;Cers4;Gal3st1;Neu3;Smpd3;Sptlc3	rno00600
rno00601	Glycosphingolipid biosynthesis - lacto and neolacto series	Metabolism	Glycan biosynthesis and metabolism	2	444	29	7679	0.506209	0.968253	1.19276	A4galt;Gcnt6	rno00601
rno00603	Glycosphingolipid biosynthesis - globo and isoglobo series	Metabolism	Glycan biosynthesis and metabolism	1	444	15	7679	0.591076	1	1.153	A4galt	rno00603
rno00620	Pyruvate metabolism	Metabolism	Carbohydrate metabolism	2	444	39	7679	0.668193	1	0.886925	Acacb;Me3	rno00620
rno00640	Propanoate metabolism	Metabolism	Carbohydrate metabolism	3	444	31	7679	0.265435	0.653935	1.67371	Abat;Acacb;Aldh6a1	rno00640
rno00650	Butanoate metabolism	Metabolism	Carbohydrate metabolism	2	444	25	7679	0.428495	0.900172	1.3836	Abat;Acsm5	rno00650
rno00730	Thiamine metabolism	Metabolism	Metabolism of cofactors and vitamins	1	444	15	7679	0.591076	1	1.153	Alpp	rno00730
rno00750	Vitamin B6 metabolism	Metabolism	Metabolism of cofactors and vitamins	2	444	10	7679	0.110376	0.373899	3.45901	Aox1;Aox3	rno00750
rno00760	Nicotinate and nicotinamide metabolism	Metabolism	Metabolism of cofactors and vitamins	5	444	32	7679	0.0349503	0.155506	2.70235	Aox1;Aox3;Nmnat2;Nmrk2;Nt5e	rno00760
rno00770	Pantothenate and CoA biosynthesis	Metabolism	Metabolism of cofactors and vitamins	1	444	19	7679	0.677931	1	0.910266	Dpyd	rno00770
rno00790	Folate biosynthesis	Metabolism	Metabolism of cofactors and vitamins	1	444	26	7679	0.787993	1	0.665194	Alpp	rno00790
rno00830	Retinol metabolism	Metabolism	Metabolism of cofactors and vitamins	5	444	80	7679	0.495612	0.968253	1.08094	Adh1;Aox1;Aox3;Cyp26b1;Cyp3a18	rno00830
rno00910	Nitrogen metabolism	Metabolism	Energy metabolism	2	444	17	7679	0.257634	0.640539	2.03471	Car14;Cps1	rno00910
rno00920	Sulfur metabolism	Metabolism	Energy metabolism	1	444	12	7679	0.510923	0.968253	1.44125	Tst	rno00920
rno00980	Metabolism of xenobiotics by cytochrome P450	Metabolism	Xenobiotics biodegradation and metabolism	4	444	64	7679	0.510883	0.968253	1.08094	Adh1;Aldh3b2;Cyp2f4;Gstm7	rno00980
rno00982	Drug metabolism - cytochrome P450	Metabolism	Xenobiotics biodegradation and metabolism	11	444	65	7679	0.00111672	0.0116397	2.92685	Adh1;Aldh3b2;Aox1;Aox3;Fmo1;Fmo2;Fmo3;Fmo6;Gstm7;Maoa;Maob	rno00982
rno00983	Drug metabolism - other enzymes	Metabolism	Xenobiotics biodegradation and metabolism	4	444	83	7679	0.715219	1	0.833496	Ces1d;Ces1f;Dpyd;Gstm7	rno00983
rno01040	Biosynthesis of unsaturated fatty acids	Metabolism	Lipid metabolism	3	444	26	7679	0.187878	0.525907	1.99558	Acot1;Acot4;Scd	rno01040
rno01521	EGFR tyrosine kinase inhibitor resistance	Human Diseases	Drug resistance: antineoplastic	1	444	79	7679	0.991173	1	0.218925	Egf	rno01521
rno01522	Endocrine resistance	Human Diseases	Drug resistance: antineoplastic	3	444	93	7679	0.911636	1	0.557905	Adcy1;Adcy5;Adcy9	rno01522
rno01523	Antifolate resistance	Human Diseases	Drug resistance: antineoplastic	1	444	30	7679	0.833082	1	0.576502	Alox12	rno01523
rno01524	Platinum drug resistance	Human Diseases	Drug resistance: antineoplastic	1	444	76	7679	0.989427	1	0.227566	Gstm7	rno01524
rno02010	ABC transporters	Environmental Information Processing	Membrane transport	7	444	47	7679	0.0173878	0.107093	2.57586	Abca6;Abca8a;Abcb1a;Abcc6;Abcc9;Abcd2;Abcg4	rno02010
rno03018	RNA degradation	Genetic Information Processing	Folding, sorting and degradation	2	444	80	7679	0.950435	1	0.432376	Eno2;Eno3	rno03018
rno03022	Basal transcription factors	Genetic Information Processing	Transcription	1	444	41	7679	0.913576	1	0.42183	Taf9b	rno03022
rno03040	Spliceosome	Genetic Information Processing	Transcription	2	444	129	7679	0.996097	1	0.26814	RGD1563496;Wbp11l1	rno03040
rno03320	PPAR signaling pathway	Organismal Systems	Endocrine system	7	444	79	7679	0.171022	0.503771	1.53247	Acsbg2;Acsl6;Cyp8b1;Plin4;Rxrg;Scd;Slc27a6	rno03320
rno03450	Non-homologous end-joining	Genetic Information Processing	Replication and repair	1	444	13	7679	0.539246	1	1.33039	Polm	rno03450
rno04010	MAPK signaling pathway	Environmental Information Processing	Signal transduction	19	444	288	7679	0.307659	0.731364	1.14099	Angpt1;Cacna1b;Cacna1d;Cacna1h;Cacna1i;Cacna2d3;Cacnb2;Cacnb4;Egf;Fgf1;Map2k6;Ngfr;Ntf3;Ntrk2;Pak2;Ppp3r2;Rasgrf2;Rasgrp2;Rps6ka2	rno04010
rno04012	ErbB signaling pathway	Environmental Information Processing	Signal transduction	3	444	85	7679	0.87695	1	0.610413	Egf;Pak2;Pak3	rno04012
rno04014	Ras signaling pathway	Environmental Information Processing	Signal transduction	17	444	227	7679	0.163955	0.488262	1.29522	Angpt1;Egf;Fgf1;Gng7;Ksr2;Ngfr;Ntf3;Ntrk2;Pak2;Pak3;Pla2g2a;Pla2g3;Pla2g5;Plce1;Rasal1;Rasgrf2;Rasgrp2	rno04014
rno04015	Rap1 signaling pathway	Environmental Information Processing	Signal transduction	16	444	205	7679	0.135549	0.432164	1.34986	Adcy1;Adcy5;Adcy9;Angpt1;Cnr1;Egf;Fgf1;Gnai1;Gnao1;Magi2;Map2k6;Ngfr;Plce1;Prkd1;Rap1gap;Rasgrp2	rno04015
rno04020	Calcium signaling pathway	Environmental Information Processing	Signal transduction	37	444	182	7679	9.26451e-12	2.51068e-09	3.51603	Adcy1;Adcy9;Adra1a;Adra1b;Adrb3;Agtr1b;Atp2a3;Atp2b4;Avpr1a;Cacna1b;Cacna1d;Cacna1h;Cacna1i;Camk4;Chrna7;Gna14;Grin2c;Htr4;Itpkb;Itpr1;Mylk;Ntsr1;P2rx1;P2rx2;P2rx6;Pde1b;Pde1c;Phkg1;Plce1;Pln;Ppp3r2;Ptger3;Ryr3;Slc8a1;Slc8a2;Tacr2;Tacr3	rno04020
rno04022	cGMP - PKG signaling pathway	Environmental Information Processing	Signal transduction	34	444	164	7679	3.79773e-11	5.14592e-09	3.58556	Adcy1;Adcy5;Adcy9;Adra1a;Adra1b;Adra2c;Adrb3;Agtr1b;Atp1a2;Atp1b2;Atp2a3;Atp2b4;Cacna1d;Creb5;Gnai1;Gucy1a3;Gucy1b3;Itpr1;Kcnma1;Kcnmb1;Kcnmb2;Kcnmb4;Mef2b;Mrvi1;Mylk;Pde2a;Pde3a;Pde5a;Pln;Ppp1r12a;Ppp3r2;Rgs2;Slc8a1;Slc8a2	rno04022
rno04024	cAMP signaling pathway	Environmental Information Processing	Signal transduction	26	444	194	7679	4.70467e-05	0.00106247	2.31789	Adcy1;Adcy5;Adcy9;Atp1a2;Atp1b2;Atp2b4;Cacna1d;Camk4;Creb5;Fxyd1;Gnai1;Gria2;Grin2c;Grin3a;Hhip;Htr1d;Htr4;Npy1r;Pde3a;Plce1;Pln;Ppp1r12a;Ptger3;Sox9;Sstr1;Tshr	rno04024
rno04060	Cytokine-cytokine receptor interaction	Environmental Information Processing	Signaling molecules and interaction	16	444	240	7679	0.313249	0.732802	1.153	Acvr2b;Ccl24;Ccl27;Cntfr;Cxcl14;Eda;Egf;Ghr;Il11ra1;Il12a;Il17d;Lepr;Lifr;Ngfr;Prlr;Tnfrsf19	rno04060
rno04062	Chemokine signaling pathway	Organismal Systems	Immune system	9	444	172	7679	0.670076	1	0.904973	Adcy1;Adcy5;Adcy9;Ccl24;Ccl27;Cxcl14;Gnai1;Gng7;Rasgrp2	rno04062
rno04064	NF-kappa B signaling pathway	Environmental Information Processing	Signal transduction	1	444	89	7679	0.995167	1	0.194326	Prkcq	rno04064
rno04066	HIF-1 signaling pathway	Environmental Information Processing	Signal transduction	4	444	99	7679	0.832415	1	0.69879	Angpt1;Egf;Eno2;Eno3	rno04066
rno04068	FoxO signaling pathway	Environmental Information Processing	Signal transduction	10	444	130	7679	0.218784	0.564671	1.33039	Ccnd2;Egf;Fbxo32;Foxo6;Prkaa2;Prkab2;Prkag2;Prkag3;Rag2;Slc2a4	rno04068
rno04070	Phosphatidylinositol signaling system	Environmental Information Processing	Signal transduction	11	444	97	7679	0.0237485	0.128717	1.96129	Cds2;Dgkb;Dgkg;Dgki;Inpp5b;Itpk1;Itpkb;Itpr1;Mtm1;Mtmr4;Plce1	rno04070
rno04071	Sphingolipid signaling pathway	Environmental Information Processing	Signal transduction	4	444	119	7679	0.919723	1	0.581346	Acer2;Cers4;Gnai1;Sptlc3	rno04071
rno04072	Phospholipase D signaling pathway	Environmental Information Processing	Signal transduction	12	444	146	7679	0.137859	0.434417	1.42151	Adcy1;Adcy5;Adcy9;Agtr1b;Avpr1a;Dgkb;Dgkg;Dgki;Egf;Grm3;Grm4;Grm6	rno04072
rno04080	Neuroactive ligand-receptor interaction	Environmental Information Processing	Signaling molecules and interaction	46	444	313	7679	2.83793e-09	2.5636e-07	2.54176	Adra1a;Adra1b;Adra2c;Adrb3;Agtr1b;Avpr1a;Calcrl;Chrna5;Chrna7;Cnr1;Gabra3;Gabre;Ghr;Glrb;Gria2;Grik2;Grik3;Grin2c;Grin3a;Grm3;Grm4;Grm6;Hcrtr2;Hrh3;Htr1d;Htr4;Lepr;Mchr1;Nmbr;Nmu;Npy1r;Ntsr1;P2rx1;P2rx2;P2rx6;Prlr;Ptger3;Sstr1;Taar4;Tacr2;Tacr3;Thra;Thrb;Trpv1;Tshb;Tshr	rno04080
rno04110	Cell cycle	Cellular Processes	Cell growth and death	3	444	123	7679	0.976552	1	0.42183	Ccnd2;Cdkn1c;Tfdp2	rno04110
rno04114	Oocyte meiosis	Cellular Processes	Cell growth and death	8	444	112	7679	0.320709	0.742839	1.23536	Adcy1;Adcy5;Adcy9;Ar;Cpeb3;Itpr1;Ppp3r2;Rps6ka2	rno04114
rno04115	p53 signaling pathway	Cellular Processes	Cell growth and death	3	444	66	7679	0.743575	1	0.786138	Adgrb1;Ccnd2;Igfbp3	rno04115
rno04120	Ubiquitin mediated proteolysis	Genetic Information Processing	Folding, sorting and degradation	1	444	132	7679	0.999641	1	0.131023	Park2	rno04120
rno04122	Sulfur relay system	Genetic Information Processing	Folding, sorting and degradation	1	444	8	7679	0.379169	0.822037	2.16188	Tst	rno04122
rno04137	Mitophagy - animal	Cellular Processes	Transport and catabolism	1	444	63	7679	0.9769	1	0.274525	Park2	rno04137
rno04140	Autophagy - animal	Cellular Processes	Transport and catabolism	5	444	129	7679	0.874582	1	0.670351	Itpr1;Mtmr4;Prkaa2;Prkcq;Rragd	rno04140
rno04141	Protein processing in endoplasmic reticulum	Genetic Information Processing	Folding, sorting and degradation	3	444	160	7679	0.996001	1	0.324282	Park2;Sec31b;Svip	rno04141
rno04142	Lysosome	Cellular Processes	Transport and catabolism	2	444	125	7679	0.995167	1	0.276721	Ap3b2;Sort1	rno04142
rno04144	Endocytosis	Cellular Processes	Transport and catabolism	4	444	256	7679	0.999844	1	0.270235	Psd2;Rab11fip4;Sh3gl2;Wipf3	rno04144
rno04145	Phagosome	Cellular Processes	Transport and catabolism	3	444	169	7679	0.997441	1	0.307013	Atp6v1b1;Atp6v1g2;Tubb4a	rno04145
rno04146	Peroxisome	Cellular Processes	Transport and catabolism	4	444	81	7679	0.697034	1	0.854076	Abcd2;Acsl6;Dao;Pxmp2	rno04146
rno04150	mTOR signaling pathway	Environmental Information Processing	Signal transduction	10	444	150	7679	0.367743	0.805188	1.153	Atp6v1b1;Atp6v1g2;Fzd3;Fzd4;Prkaa2;Rps6ka2;Rragd;Wnt10b;Wnt11;Wnt2b	rno04150
rno04151	PI3K-Akt signaling pathway	Environmental Information Processing	Signal transduction	16	444	335	7679	0.821901	1	0.826032	Angpt1;Ccnd2;Col4a3;Col4a6;Creb5;Egf;Fgf1;Ghr;Gng7;Itga11;Lamc3;Ngfr;Ntf3;Ntrk2;Prkaa2;Prlr	rno04151
rno04152	AMPK signaling pathway	Environmental Information Processing	Signal transduction	12	444	123	7679	0.0516111	0.211918	1.68732	Acacb;Adra1a;Creb5;Fbp1;Lepr;Ppargc1a;Prkaa2;Prkab2;Prkag2;Prkag3;Scd;Slc2a4	rno04152
rno04210	Apoptosis	Cellular Processes	Cell growth and death	1	444	134	7679	0.999682	1	0.129068	Itpr1	rno04210
rno04211	Longevity regulating pathway - mammal	Organismal Systems	Aging	10	444	89	7679	0.0320259	0.152264	1.94326	Adcy1;Adcy5;Adcy9;Camk4;Creb5;Ppargc1a;Prkaa2;Prkab2;Prkag2;Prkag3	rno04211
rno04213	Longevity regulating pathway - multiple species	Organismal Systems	Aging	7	444	62	7679	0.0653596	0.247975	1.95267	Adcy1;Adcy5;Adcy9;Prkaa2;Prkab2;Prkag2;Prkag3	rno04213
rno04215	Apoptosis - multiple species	Cellular Processes	Cell growth and death	1	444	32	7679	0.851899	1	0.54047	Ngfr	rno04215
rno04216	Ferroptosis	Cellular Processes	Cell growth and death	1	444	39	7679	0.902582	1	0.443463	Acsl6	rno04216
rno04217	Necroptosis	Cellular Processes	Cell growth and death	1	444	145	7679	0.999837	1	0.119276	Pygm	rno04217
rno04218	Cellular senescence	Cellular Processes	Cell growth and death	6	444	173	7679	0.940547	1	0.599828	Cacna1d;Ccnd2;Igfbp3;Itpr1;Map2k6;Ppp3r2	rno04218
rno04260	Cardiac muscle contraction	Organismal Systems	Circulatory system	9	444	75	7679	0.0281601	0.136275	2.07541	Atp1a2;Atp1b2;Cacna1d;Cacna2d3;Cacnb2;Cacnb4;Myh6;Slc8a1;Tnnt2	rno04260
rno04261	Adrenergic signaling in cardiomyocytes	Organismal Systems	Circulatory system	22	444	143	7679	2.14297e-05	0.000645274	2.66078	Adcy1;Adcy5;Adcy9;Adra1a;Adra1b;Agtr1b;Atp1a2;Atp1b2;Atp2b4;Cacna1d;Cacna2d3;Cacnb2;Cacnb4;Creb5;Gnai1;Myh6;Pln;Ppp1r1a;Scn4b;Scn7a;Slc8a1;Tnnt2	rno04261
rno04270	Vascular smooth muscle contraction	Organismal Systems	Circulatory system	26	444	130	7679	1.80052e-08	1.21985e-06	3.45901	Adcy1;Adcy5;Adcy9;Adra1a;Adra1b;Agtr1b;Avpr1a;Cacna1d;Calcrl;Gucy1a3;Gucy1b3;Itpr1;Kcnma1;Kcnmb1;Kcnmb2;Kcnmb4;Mrvi1;Mylk;Pla2g2a;Pla2g3;Pla2g5;Ppp1r12a;Ppp1r12b;Ppp1r12c;Ppp1r14a;Prkcq	rno04270
rno04310	Wnt signaling pathway	Environmental Information Processing	Signal transduction	16	444	143	7679	0.00822048	0.057773	1.93511	Bambi;Ccnd2;Cxxc4;Frat1;Fzd3;Fzd4;Nkd1;Nkd2;Notum;Ppp3r2;Sfrp2;Sfrp5;Sox17;Wnt10b;Wnt11;Wnt2b	rno04310
rno04340	Hedgehog signaling pathway	Environmental Information Processing	Signal transduction	3	444	43	7679	0.456688	0.930545	1.20663	Ccnd2;Hhip;Ihh	rno04340
rno04350	TGF-beta signaling pathway	Environmental Information Processing	Signal transduction	10	444	84	7679	0.0224097	0.126521	2.05893	Acvr1c;Acvr2b;Bambi;Bmp8a;Dcn;Gdf7;Id2;Id4;Pitx2;Smad6	rno04350
rno04360	Axon guidance	Organismal Systems	Development and regeneration	20	444	175	7679	0.00260298	0.0236642	1.97658	Ablim2;Fzd3;Gdf7;Gnai1;L1cam;Ngef;Ntn1;Ntng1;Pak2;Pak3;Plxna4;Plxnb1;Plxnb3;Ppp3r2;Sema3a;Sema3b;Sema3e;Sema5a;Unc5b;Unc5d	rno04360
rno04370	VEGF signaling pathway	Environmental Information Processing	Signal transduction	1	444	57	7679	0.966882	1	0.303422	Ppp3r2	rno04370
rno04371	Apelin signaling pathway	Environmental Information Processing	Signal transduction	18	444	134	7679	0.000663901	0.00737508	2.32322	Adcy1;Adcy5;Adcy9;Agtr1b;Camk4;Gnai1;Gng7;Itpr1;Mef2b;Mylk;Ppargc1a;Prkaa2;Prkab2;Prkag2;Prkag3;Ryr3;Slc8a1;Slc8a2	rno04371
rno04380	Osteoclast differentiation	Organismal Systems	Development and regeneration	4	444	122	7679	0.928534	1	0.567051	Camk4;Fosb;Map2k6;Ppp3r2	rno04380
rno04390	Hippo signaling pathway	Environmental Information Processing	Signal transduction	13	444	152	7679	0.10074	0.350006	1.47918	Bmp8a;Ccnd2;Ctnna3;Dlg2;Fgf1;Fzd3;Fzd4;Gdf7;Id2;Nkd1;Wnt10b;Wnt11;Wnt2b	rno04390
rno04392	Hippo signaling pathway - multiple species	Environmental Information Processing	Signal transduction	3	444	28	7679	0.218255	0.564671	1.85304	Dchs2;Fat4;Rassf2	rno04392
rno04510	Focal adhesion	Cellular Processes	Cellular community - eukaryotes	12	444	196	7679	0.46198	0.934303	1.05888	Ccnd2;Col4a3;Col4a6;Egf;Itga11;Lamc3;Mylk;Pak2;Pak3;Ppp1r12a;Ppp1r12b;Ppp1r12c	rno04510
rno04512	ECM-receptor interaction	Environmental Information Processing	Signaling molecules and interaction	4	444	82	7679	0.706228	1	0.843661	Col4a3;Col4a6;Itga11;Lamc3	rno04512
rno04514	Cell adhesion molecules (CAMs)	Environmental Information Processing	Signaling molecules and interaction	14	444	155	7679	0.064065	0.247975	1.56213	Cadm3;Cdh4;Cldn1;Cldn11;Cntn1;Cntnap2;L1cam;Lrrc4b;Ncam2;Negr1;Neo1;Nrxn2;Ntng1;Sdc2	rno04514
rno04520	Adherens junction	Cellular Processes	Cellular community - eukaryotes	1	444	71	7679	0.985717	1	0.243592	Ctnna3	rno04520
rno04530	Tight junction	Cellular Processes	Cellular community - eukaryotes	10	444	165	7679	0.486189	0.968253	1.04818	Actr3b;Bves;Cacna1d;Cldn1;Cldn11;Dlg2;Prkaa2;Prkab2;Prkag2;Prkag3	rno04530
rno04540	Gap junction	Cellular Processes	Cellular community - eukaryotes	9	444	86	7679	0.0594924	0.237095	1.80995	Adcy1;Adcy5;Adcy9;Egf;Gnai1;Gucy1a3;Gucy1b3;Itpr1;Tubb4a	rno04540
rno04550	Signaling pathways regulating pluripotency of stem cells	Cellular Processes	Cellular community - eukaryotes	12	444	135	7679	0.0901551	0.321474	1.53734	Acvr1c;Acvr2b;Fzd3;Fzd4;Hand1;Id2;Id4;Klf4;Lifr;Wnt10b;Wnt11;Wnt2b	rno04550
rno04610	Complement and coagulation cascades	Organismal Systems	Immune system	4	444	80	7679	0.687636	1	0.864752	C6;C7;F13a1;Thbd	rno04610
rno04611	Platelet activation	Organismal Systems	Immune system	11	444	124	7679	0.102796	0.35263	1.53424	Adcy1;Adcy5;Adcy9;Gnai1;Gucy1a3;Gucy1b3;Itpr1;Mylk;P2rx1;Ppp1r12a;Rasgrp2	rno04611
rno04612	Antigen processing and presentation	Organismal Systems	Immune system	1	444	78	7679	0.990626	1	0.221731	Rfxapl1	rno04612
rno04614	Renin-angiotensin system	Organismal Systems	Endocrine system	2	444	35	7679	0.609132	1	0.988288	Agtr1b;Mrgprd	rno04614
rno04620	Toll-like receptor signaling pathway	Organismal Systems	Immune system	2	444	91	7679	0.97149	1	0.380111	Il12a;Map2k6	rno04620
rno04621	NOD-like receptor signaling pathway	Organismal Systems	Immune system	1	444	154	7679	0.999906	1	0.112305	Itpr1	rno04621
rno04622	RIG-I-like receptor signaling pathway	Organismal Systems	Immune system	1	444	60	7679	0.97234	1	0.288251	Il12a	rno04622
rno04625	C-type lectin receptor signaling pathway	Organismal Systems	Immune system	4	444	108	7679	0.878585	1	0.640557	Il12a;Il17d;Itpr1;Ppp3r2	rno04625
rno04630	Jak-STAT signaling pathway	Environmental Information Processing	Signal transduction	13	444	151	7679	0.0969283	0.341137	1.48898	Aox1;Aox3;Ccnd2;Cntfr;Egf;Ghr;Il11ra1;Il12a;Il13ra2;Il17d;Lepr;Lifr;Prlr	rno04630
rno04640	Hematopoietic cell lineage	Organismal Systems	Immune system	1	444	87	7679	0.994548	1	0.198794	Il11ra1	rno04640
rno04650	Natural killer cell mediated cytotoxicity	Organismal Systems	Immune system	1	444	125	7679	0.999451	1	0.13836	Ppp3r2	rno04650
rno04657	IL-17 signaling pathway	Organismal Systems	Immune system	2	444	91	7679	0.97149	1	0.380111	Fosb;Il17d	rno04657
rno04658	Th1 and Th2 cell differentiation	Organismal Systems	Immune system	3	444	88	7679	0.891174	1	0.589604	Il12a;Ppp3r2;Prkcq	rno04658
rno04659	Th17 cell differentiation	Organismal Systems	Immune system	4	444	102	7679	0.849221	1	0.678237	Il17d;Ppp3r2;Prkcq;Rxrg	rno04659
rno04660	T cell receptor signaling pathway	Organismal Systems	Immune system	5	444	101	7679	0.702363	1	0.85619	Grap2;Pak2;Pak3;Ppp3r2;Prkcq	rno04660
rno04662	B cell receptor signaling pathway	Organismal Systems	Immune system	1	444	70	7679	0.984832	1	0.247072	Ppp3r2	rno04662
rno04664	Fc epsilon RI signaling pathway	Organismal Systems	Immune system	1	444	65	7679	0.979515	1	0.266078	Map2k6	rno04664
rno04666	Fc gamma R-mediated phagocytosis	Organismal Systems	Immune system	1	444	85	7679	0.99385	1	0.203471	Gsn	rno04666
rno04668	TNF signaling pathway	Environmental Information Processing	Signal transduction	2	444	106	7679	0.986831	1	0.326322	Creb5;Map2k6	rno04668
rno04670	Leukocyte transendothelial migration	Organismal Systems	Immune system	4	444	113	7679	0.899144	1	0.612214	Cldn1;Cldn11;Ctnna3;Gnai1	rno04670
rno04710	Circadian rhythm	Organismal Systems	Environmental adaptation	5	444	30	7679	0.0271659	0.136275	2.88251	Npas2;Prkaa2;Prkab2;Prkag2;Prkag3	rno04710
rno04713	Circadian entrainment	Organismal Systems	Environmental adaptation	17	444	96	7679	2.96986e-05	0.000804831	3.06266	Adcy1;Adcy5;Adcy9;Cacna1d;Cacna1h;Cacna1i;Gnai1;Gnao1;Gng7;Gria2;Grin2c;Gucy1a3;Gucy1b3;Itpr1;Kcnj3;Rasd1;Ryr3	rno04713
rno04714	Thermogenesis	Organismal Systems	Environmental adaptation	17	444	214	7679	0.113072	0.378303	1.37391	Acsl6;Adcy1;Adcy5;Adcy9;Adrb3;Bmp8a;Cnr1;Cox20;Creb5;Dpf3;Ppargc1a;Prkaa2;Prkab2;Prkag2;Prkag3;Rps6ka2;Smarcd3	rno04714
rno04720	Long-term potentiation	Organismal Systems	Nervous system	8	444	66	7679	0.035465	0.155506	2.09637	Adcy1;Camk4;Gria2;Grin2c;Itpr1;Ppp1r1a;Ppp3r2;Rps6ka2	rno04720
rno04721	Synaptic vesicle cycle	Organismal Systems	Nervous system	5	444	62	7679	0.28783	0.696446	1.39476	Atp6v1b1;Atp6v1g2;Cacna1b;Cplx1;Rims1	rno04721
rno04722	Neurotrophin signaling pathway	Organismal Systems	Nervous system	7	444	119	7679	0.537334	1	1.01736	Camk4;Ngfr;Ntf3;Ntrk2;Ntrk3;Rps6ka2;Sort1	rno04722
rno04723	Retrograde endocannabinoid signaling	Organismal Systems	Nervous system	15	444	138	7679	0.0132701	0.0856237	1.8799	Adcy1;Adcy5;Adcy9;Cacna1b;Cacna1d;Cnr1;Gabra3;Gabre;Gnai1;Gnao1;Gng7;Gria2;Itpr1;Kcnj3;Rims1	rno04723
rno04724	Glutamatergic synapse	Organismal Systems	Nervous system	21	444	112	7679	1.3284e-06	5.99995e-05	3.24282	Adcy1;Adcy5;Adcy9;Cacna1d;Gnai1;Gnao1;Gng7;Gria2;Grik2;Grik3;Grin2c;Grin3a;Grm3;Grm4;Grm6;Itpr1;Kcnj3;Ppp3r2;Shank1;Shank2;Slc38a3	rno04724
rno04725	Cholinergic synapse	Organismal Systems	Nervous system	16	444	111	7679	0.000598535	0.00705252	2.49298	Adcy1;Adcy5;Adcy9;Cacna1b;Cacna1d;Camk4;Chrna7;Creb5;Gnai1;Gnao1;Gng7;Itpr1;Kcnj12;Kcnj3;Kcnq4;Kcnq5	rno04725
rno04726	Serotonergic synapse	Organismal Systems	Nervous system	19	444	119	7679	4.61653e-05	0.00106247	2.76139	Adcy5;Alox12;Alox15b;Cacna1b;Cacna1d;Cyp2d4;Cyp2j3;Cyp2j4;Ddc;Gnai1;Gnao1;Gng7;Htr1d;Htr4;Itpr1;Kcnj3;Kcnn2;Maoa;Maob	rno04726
rno04727	GABAergic synapse	Organismal Systems	Nervous system	14	444	87	7679	0.000419862	0.00568914	2.78311	Abat;Adcy1;Adcy5;Adcy9;Cacna1b;Cacna1d;Gabra3;Gabre;Gnai1;Gnao1;Gng7;Slc38a3;Slc38a5;Slc6a1	rno04727
rno04728	Dopaminergic synapse	Organismal Systems	Nervous system	13	444	129	7679	0.0351715	0.155506	1.74291	Adcy5;Cacna1b;Cacna1d;Creb5;Ddc;Gnai1;Gnao1;Gng7;Gria2;Itpr1;Kcnj3;Maoa;Maob	rno04728
rno04730	Long-term depression	Organismal Systems	Nervous system	7	444	60	7679	0.0565468	0.228719	2.01776	Gnai1;Gnao1;Gnaz;Gria2;Gucy1a3;Gucy1b3;Itpr1	rno04730
rno04740	Olfactory transduction	Organismal Systems	Sensory system	10	444	1088	7679	1	1	0.158962	Gng7;Gucy2d;Ncald;Olr1375;Pde1b;Pde1c;Pde2a;Rgs2;Slc8a1;Slc8a2	rno04740
rno04742	Taste transduction	Organismal Systems	Sensory system	12	444	86	7679	0.00370671	0.0324038	2.41326	Asic2;Gabra3;Grm4;Htr1d;P2rx2;Pde1b;Pde1c;Scn2a;Scn9a;Scnn1b;Scnn1g;Tas1r3	rno04742
rno04744	Phototransduction	Organismal Systems	Sensory system	2	444	26	7679	0.448547	0.92791	1.33039	Gucy2d;Rgs9	rno04744
rno04750	Inflammatory mediator regulation of TRP channels	Organismal Systems	Sensory system	12	444	111	7679	0.0261761	0.133844	1.86973	Adcy1;Adcy5;Adcy9;Alox12;Asic2;Asic4;Cyp2j3;Cyp2j4;Itpr1;Map2k6;Prkcq;Trpv1	rno04750
rno04810	Regulation of actin cytoskeleton	Cellular Processes	Cell motility	11	444	208	7679	0.664777	1	0.914642	Arhgef6;Egf;Fgf1;Gsn;Itga11;Mylk;Pak2;Pak3;Ppp1r12a;Ppp1r12b;Ppp1r12c	rno04810
rno04910	Insulin signaling pathway	Organismal Systems	Endocrine system	11	444	134	7679	0.151715	0.461965	1.41974	Acacb;Fbp1;Phkg1;Ppargc1a;Ppp1r3a;Prkaa2;Prkab2;Prkag2;Prkag3;Pygm;Slc2a4	rno04910
rno04911	Insulin secretion	Organismal Systems	Endocrine system	14	444	85	7679	0.000327935	0.00493724	2.8486	Adcy1;Adcy5;Adcy9;Atp1a2;Atp1b2;Cacna1d;Creb5;Kcnma1;Kcnmb1;Kcnmb2;Kcnmb4;Kcnn1;Kcnn2;Pclo	rno04911
rno04912	GnRH signaling pathway	Organismal Systems	Endocrine system	6	444	89	7679	0.41045	0.869	1.16596	Adcy1;Adcy5;Adcy9;Cacna1d;Itpr1;Map2k6	rno04912
rno04913	Ovarian Steroidogenesis	Organismal Systems	Endocrine system	8	444	51	7679	0.0083142	0.057773	2.71295	Adcy1;Adcy5;Adcy9;Bmp15;Cyp11a1;Cyp2j3;Cyp2j4;Hsd17b2	rno04913
rno04914	Progesterone-mediated oocyte maturation	Organismal Systems	Endocrine system	6	444	88	7679	0.399951	0.860213	1.17921	Adcy1;Adcy5;Adcy9;Cpeb3;Gnai1;Rps6ka2	rno04914
rno04915	Estrogen signaling pathway	Organismal Systems	Endocrine system	9	444	130	7679	0.337604	0.768829	1.19735	Adcy1;Adcy5;Adcy9;Creb5;Gnai1;Gnao1;Itpr1;Kcnj3;Krt20	rno04915
rno04916	Melanogenesis	Organismal Systems	Endocrine system	11	444	98	7679	0.025417	0.133844	1.94128	Adcy1;Adcy5;Adcy9;Dct;Fzd3;Fzd4;Gnai1;Gnao1;Wnt10b;Wnt11;Wnt2b	rno04916
rno04917	Prolactin signaling pathway	Organismal Systems	Endocrine system	2	444	72	7679	0.926534	1	0.480418	Ccnd2;Prlr	rno04917
rno04918	Thyroid hormone synthesis	Organismal Systems	Endocrine system	11	444	72	7679	0.00261965	0.0236642	2.6423	Adcy1;Adcy5;Adcy9;Asgr1;Atp1a2;Atp1b2;Creb5;Itpr1;Tshb;Tshr;Ttr	rno04918
rno04919	Thyroid hormone signaling pathway	Organismal Systems	Endocrine system	11	444	117	7679	0.0749833	0.278363	1.62603	Atp1a2;Atp1b2;Med12l;Myh6;Plce1;Pln;Rcan2;Rxrg;Slc16a10;Thra;Thrb	rno04919
rno04920	Adipocytokine signaling pathway	Organismal Systems	Endocrine system	12	444	71	7679	0.000680358	0.00737508	2.92311	Acacb;Acsbg2;Acsl6;Lepr;Ppargc1a;Prkaa2;Prkab2;Prkag2;Prkag3;Prkcq;Rxrg;Slc2a4	rno04920
rno04921	Oxytocin signaling pathway	Organismal Systems	Endocrine system	26	444	152	7679	4.81054e-07	2.60731e-05	2.95836	Adcy1;Adcy5;Adcy9;Cacna1d;Cacna2d3;Cacnb2;Cacnb4;Camk4;Gnai1;Gnao1;Gucy1a3;Gucy1b3;Itpr1;Kcnj12;Kcnj3;Mylk;Ppp1r12a;Ppp1r12b;Ppp1r12c;Ppp3r2;Prkaa2;Prkab2;Prkag2;Prkag3;Rgs2;Ryr3	rno04921
rno04922	Glucagon signaling pathway	Organismal Systems	Endocrine system	12	444	100	7679	0.0123017	0.0813112	2.07541	Acacb;Creb5;Fbp1;Itpr1;Phkg1;Ppargc1a;Ppp3r2;Prkaa2;Prkab2;Prkag2;Prkag3;Pygm	rno04922
rno04923	Regulation of lipolysis in adipocyte	Organismal Systems	Endocrine system	9	444	55	7679	0.00392734	0.0332597	2.8301	Adcy1;Adcy5;Adcy9;Adrb3;Gnai1;Npy1r;Ptger3;Tshb;Tshr	rno04923
rno04924	Renin secretion	Organismal Systems	Endocrine system	13	444	68	7679	0.000114096	0.00206133	3.30641	Adcy5;Adrb3;Agtr1b;Cacna1d;Gnai1;Gucy1a3;Gucy1b3;Itpr1;Kcnma1;Pde1b;Pde1c;Pde3a;Ppp3r2	rno04924
rno04925	Aldosterone synthesis and secretion	Organismal Systems	Endocrine system	18	444	94	7679	5.57915e-06	0.000215993	3.31182	Adcy1;Adcy5;Adcy9;Agtr1b;Atp1a2;Atp1b2;Atp2b4;Cacna1d;Cacna1h;Cacna1i;Camk4;Creb5;Cyp11a1;Cyp21a1;Itpr1;Kcnk3;Pde2a;Prkd1	rno04925
rno04926	Relaxin signaling pathway	Organismal Systems	Endocrine system	9	444	126	7679	0.304947	0.731333	1.23536	Adcy1;Adcy5;Adcy9;Col4a3;Col4a6;Creb5;Gnai1;Gnao1;Gng7	rno04926
rno04927	Cortisol synthesis and secretion	Organismal Systems	Endocrine system	12	444	63	7679	0.000215947	0.00365759	3.29429	Adcy1;Adcy5;Adcy9;Agtr1b;Cacna1d;Cacna1h;Cacna1i;Creb5;Cyp11a1;Cyp21a1;Itpr1;Kcnk3	rno04927
rno04930	Type II diabetes mellitus	Human Diseases	Endocrine and metabolic disease	3	444	47	7679	0.516387	0.971811	1.10394	Cacna1b;Cacna1d;Slc2a4	rno04930
rno04931	Insulin resistance	Human Diseases	Endocrine and metabolic disease	13	444	108	7679	0.00914415	0.0619516	2.08181	Acacb;Creb5;Ppargc1a;Ppp1r3a;Prkaa2;Prkab2;Prkag2;Prkag3;Prkcq;Pygm;Rps6ka2;Slc27a6;Slc2a4	rno04931
rno04932	Non-alcoholic fatty liver disease (NAFLD)	Human Diseases	Endocrine and metabolic disease	5	444	145	7679	0.928217	1	0.596381	Lepr;Prkaa2;Prkab2;Prkag2;Prkag3	rno04932
rno04933	AGE-RAGE signaling pathway in diabetic complications	Human Diseases	Endocrine and metabolic disease	5	444	99	7679	0.685462	1	0.873487	Agtr1b;Col4a3;Col4a6;Plce1;Thbd	rno04933
rno04934	Cushing's syndrome	Human Diseases	Endocrine and metabolic disease	19	444	153	7679	0.0012546	0.0125925	2.14775	Adcy1;Adcy5;Adcy9;Agtr1b;Cacna1d;Cacna1h;Cacna1i;Creb5;Cyp11a1;Cyp21a1;Fzd3;Fzd4;Gnai1;Itpr1;Kcnk3;Rasd1;Wnt10b;Wnt11;Wnt2b	rno04934
rno04940	Type I diabetes mellitus	Human Diseases	Endocrine and metabolic disease	1	444	60	7679	0.97234	1	0.288251	Il12a	rno04940
rno04950	Maturity onset diabetes of the young	Human Diseases	Endocrine and metabolic disease	1	444	27	7679	0.800293	1	0.640557	Iapp	rno04950
rno04960	Aldosterone-regulated sodium reabsorption	Organismal Systems	Excretory system	6	444	38	7679	0.0206211	0.121485	2.7308	Atp1a2;Atp1b2;Hsd11b2;Nr3c2;Scnn1b;Scnn1g	rno04960
rno04961	Endocrine and other factor-regulated calcium reabsorption	Organismal Systems	Excretory system	4	444	52	7679	0.354194	0.793277	1.33039	Adcy9;Atp1a2;Atp1b2;Slc8a1	rno04961
rno04962	Vasopressin-regulated water reabsorption	Organismal Systems	Excretory system	2	444	42	7679	0.707599	1	0.823574	Adcy9;Creb5	rno04962
rno04964	Proximal tubule bicarbonate reclamation	Organismal Systems	Excretory system	3	444	22	7679	0.131164	0.424218	2.35842	Atp1a2;Atp1b2;Slc38a3	rno04964
rno04966	Collecting duct acid secretion	Organismal Systems	Excretory system	3	444	27	7679	0.202933	0.539165	1.92167	Atp6v1b1;Atp6v1g2;Slc12a7	rno04966
rno04970	Salivary secretion	Organismal Systems	Digestive system	14	444	76	7679	9.5652e-05	0.00185155	3.18593	Adcy1;Adcy5;Adcy9;Adra1a;Adra1b;Adrb3;Atp1a2;Atp1b2;Atp2b4;Gucy1a3;Gucy1b3;Itpr1;Kcnma1;Ryr3	rno04970
rno04971	Gastric acid secretion	Organismal Systems	Digestive system	9	444	74	7679	0.0260585	0.133844	2.10345	Adcy1;Adcy5;Adcy9;Atp1a2;Atp1b2;Gnai1;Itpr1;Mylk;Slc26a7	rno04971
rno04972	Pancreatic secretion	Organismal Systems	Digestive system	14	444	98	7679	0.00141533	0.0136984	2.47072	Adcy1;Adcy5;Adcy9;Atp1a2;Atp1b2;Atp2a3;Atp2b4;Cel;Cela3b;Itpr1;Kcnma1;Pla2g2a;Pla2g3;Pla2g5	rno04972
rno04973	Carbohydrate digestion and absorption	Organismal Systems	Digestive system	4	444	39	7679	0.186566	0.525907	1.77385	Atp1a2;Atp1b2;Cacna1d;Tas1r3	rno04973
rno04974	Protein digestion and absorption	Organismal Systems	Digestive system	10	444	87	7679	0.0278844	0.136275	1.98794	Atp1a2;Atp1b2;Cela3b;Col11a2;Col4a3;Col4a6;Slc16a10;Slc8a1;Slc8a2;Xpnpep2	rno04974
rno04975	Fat digestion and absorption	Organismal Systems	Digestive system	5	444	40	7679	0.0787455	0.288379	2.16188	Cel;Mttp;Pla2g2a;Pla2g3;Pla2g5	rno04975
rno04976	Bile secretion	Organismal Systems	Digestive system	10	444	71	7679	0.00727893	0.054861	2.43592	Abcb1a;Adcy1;Adcy5;Adcy9;Atp1a2;Atp1b2;Kcnn2;Nr1h4;Slco1a2;Slco1a5	rno04976
rno04977	Vitamin digestion and absorption	Organismal Systems	Digestive system	2	444	24	7679	0.408066	0.869	1.44125	Folh1;Slc23a1	rno04977
rno04978	Mineral absorption	Organismal Systems	Digestive system	3	444	43	7679	0.456688	0.930545	1.20663	Atp1a2;Atp1b2;Slc8a1	rno04978
rno04979	Cholesterol metabolism	Organismal Systems	Digestive system	1	444	49	7679	0.946487	1	0.35296	Sort1	rno04979
rno05010	Alzheimer's disease	Human Diseases	Neurodegenerative disease	7	444	164	7679	0.844461	1	0.738203	Apbb1;Atp2a3;Cacna1d;Grin2c;Itpr1;Ppp3r2;Ryr3	rno05010
rno05012	Parkinson's disease	Human Diseases	Neurodegenerative disease	3	444	127	7679	0.980515	1	0.408544	Adcy5;Gnai1;Park2	rno05012
rno05014	Amyotrophic lateral sclerosis (ALS)	Human Diseases	Neurodegenerative disease	6	444	53	7679	0.0837441	0.302595	1.95793	Gria2;Grin2c;Map2k6;Nefl;Ppp3r2;Prph	rno05014
rno05016	Huntington's disease	Human Diseases	Neurodegenerative disease	6	444	181	7679	0.955123	1	0.573316	Creb5;Dnah10;Dnah9;Dnai1;Itpr1;Ppargc1a	rno05016
rno05020	Prion diseases	Human Diseases	Neurodegenerative disease	3	444	34	7679	0.313672	0.732802	1.52603	C6;C7;Ncam2	rno05020
rno05030	Cocaine addiction	Human Diseases	Substance dependence	12	444	47	7679	9.84198e-06	0.000333397	4.41576	Adcy5;Creb5;Ddc;Fosb;Gnai1;Gria2;Grin2c;Grin3a;Grm3;Maoa;Maob;Rgs9	rno05030
rno05031	Amphetamine addiction	Human Diseases	Substance dependence	13	444	66	7679	8.26892e-05	0.00172375	3.4066	Adcy5;Arc;Cacna1d;Camk4;Creb5;Ddc;Fosb;Gria2;Grin2c;Grin3a;Maoa;Maob;Ppp3r2	rno05031
rno05032	Morphine addiction	Human Diseases	Substance dependence	14	444	90	7679	0.000598553	0.00705252	2.69034	Adcy1;Adcy5;Adcy9;Cacna1b;Gabra3;Gabre;Gnai1;Gnao1;Gng7;Kcnj3;Pde1b;Pde1c;Pde2a;Pde3a	rno05032
rno05033	Nicotine addiction	Human Diseases	Substance dependence	7	444	40	7679	0.00728781	0.054861	3.02663	Cacna1b;Chrna7;Gabra3;Gabre;Gria2;Grin2c;Grin3a	rno05033
rno05034	Alcoholism	Human Diseases	Substance dependence	16	444	143	7679	0.00822048	0.057773	1.93511	Adcy5;Camk4;Camkk1;Creb5;Ddc;Fosb;Gnai1;Gnao1;Gng7;Grin2c;Grin3a;Hdac11;Maoa;Maob;Ntrk2;Pkia	rno05034
rno05100	Bacterial invasion of epithelial cells	Human Diseases	Infectious disease: bacterial	2	444	75	7679	0.936554	1	0.461201	Arhgef26;Ctnna3	rno05100
rno05133	Pertussis	Human Diseases	Infectious disease: bacterial	2	444	72	7679	0.926534	1	0.480418	Gnai1;Il12a	rno05133
rno05134	Legionellosis	Human Diseases	Infectious disease: bacterial	1	444	53	7679	0.957899	1	0.326322	Il12a	rno05134
rno05140	Leishmaniasis	Human Diseases	Infectious disease: parasitic	1	444	65	7679	0.979515	1	0.266078	Il12a	rno05140
rno05142	Chagas disease (American trypanosomiasis)	Human Diseases	Infectious disease: parasitic	5	444	101	7679	0.702363	1	0.85619	Adcy1;Gna14;Gnai1;Gnao1;Il12a	rno05142
rno05143	African trypanosomiasis	Human Diseases	Infectious disease: parasitic	1	444	34	7679	0.868599	1	0.508678	Il12a	rno05143
rno05144	Malaria	Human Diseases	Infectious disease: parasitic	2	444	52	7679	0.81163	1	0.665194	Il12a;Sdc2	rno05144
rno05145	Toxoplasmosis	Human Diseases	Infectious disease: parasitic	5	444	107	7679	0.749232	1	0.80818	Gnai1;Gnao1;Il12a;Lamc3;Map2k6	rno05145
rno05146	Amoebiasis	Human Diseases	Infectious disease: parasitic	6	444	96	7679	0.48309	0.968253	1.08094	Adcy1;Col4a3;Col4a6;Gna14;Il12a;Lamc3	rno05146
rno05152	Tuberculosis	Human Diseases	Infectious disease: bacterial	3	444	169	7679	0.997441	1	0.307013	Il12a;Ppp3r2;Rfxapl1	rno05152
rno05160	Hepatitis C	Human Diseases	Infectious disease: viral	3	444	122	7679	0.975447	1	0.425288	Cldn1;Cldn11;Egf	rno05160
rno05161	Hepatitis B	Human Diseases	Infectious disease: viral	1	444	134	7679	0.999682	1	0.129068	Creb5	rno05161
rno05162	Measles	Human Diseases	Infectious disease: viral	3	444	125	7679	0.97862	1	0.415081	Ccnd2;Il12a;Prkcq	rno05162
rno05164	Influenza A	Human Diseases	Infectious disease: viral	2	444	158	7679	0.999192	1	0.218925	Il12a;Map2k6	rno05164
rno05165	Human papillomavirus infection	Human Diseases	Infectious disease: viral	14	444	327	7679	0.909598	1	0.740461	Ccnd2;Col4a3;Col4a6;Creb5;Dlg2;Egf;Fzd3;Fzd4;Hdac11;Itga11;Lamc3;Wnt10b;Wnt11;Wnt2b	rno05165
rno05166	HTLV-I infection	Human Diseases	Infectious disease: viral	10	444	269	7679	0.953915	1	0.642938	Adcy1;Adcy5;Adcy9;Ccnd2;Fzd3;Fzd4;Ppp3r2;Wnt10b;Wnt11;Wnt2b	rno05166
rno05167	Kaposi's sarcoma-associated herpesvirus infection	Human Diseases	Infectious disease: viral	4	444	194	7679	0.996823	1	0.356599	Gng7;Itpr1;Map2k6;Ppp3r2	rno05167
rno05168	Herpes simplex infection	Human Diseases	Infectious disease: viral	2	444	190	7679	0.999864	1	0.182053	Il12a;Taf9b	rno05168
rno05169	Epstein-Barr virus infection	Human Diseases	Infectious disease: viral	2	444	204	7679	0.999938	1	0.169559	Hspb2;Map2k6	rno05169
rno05200	Pathways in cancer	Human Diseases	Cancer: overview	28	444	508	7679	0.635415	1	0.95327	Adcy1;Adcy5;Adcy9;Agtr1b;Alk;Ar;Ccnd2;Col4a3;Col4a6;Ctnna3;Egf;Fgf1;Frat1;Fzd3;Fzd4;Gnai1;Gng7;Gstm7;Hhip;Il12a;Lamc3;Ptger3;Rasgrp2;Runx1t1;Rxrg;Wnt10b;Wnt11;Wnt2b	rno05200
rno05202	Transcriptional misregulation in cancers	Human Diseases	Cancer: overview	10	444	168	7679	0.509476	0.968253	1.02947	Ccnd2;Etv1;Eya1;Hpgd;Id2;Igfbp3;Ngfr;Runx1t1;Rxrg;Ssx1	rno05202
rno05203	Viral carcinogenesis	Human Diseases	Cancer: overview	4	444	201	7679	0.997711	1	0.34418	Ccnd2;Creb5;Gsn;Hdac11	rno05203
rno05204	Chemical carcinogenesis	Human Diseases	Cancer: overview	6	444	85	7679	0.368425	0.805188	1.22083	Adh1;Aldh3b2;Chrna7;Cyp3a18;Gstm7;Sult1a1	rno05204
rno05205	Proteoglycans in cancer	Human Diseases	Cancer: overview	18	444	198	7679	0.0373251	0.160557	1.57228	Ank2;Dcn;Fzd3;Fzd4;Hoxd10;Hpse2;Hspb2;Ihh;Itpr1;Plce1;Ppp1r12a;Ppp1r12b;Ppp1r12c;Sdc2;Twist1;Wnt10b;Wnt11;Wnt2b	rno05205
rno05206	MicroRNAs in cancer	Human Diseases	Cancer: overview	5	444	141	7679	0.91716	1	0.613299	Abcb1a;Ccnd2;Fzd3;Hoxd10;Mmp16	rno05206
rno05210	Colorectal cancer	Human Diseases	Cancer: specific types	1	444	86	7679	0.994209	1	0.201105	Egf	rno05210
rno05211	Renal cell carcinoma	Human Diseases	Cancer: specific types	2	444	66	7679	0.901868	1	0.524092	Pak2;Pak3	rno05211
rno05212	Pancreatic cancer	Human Diseases	Cancer: specific types	2	444	74	7679	0.933367	1	0.467434	Arhgef6;Egf	rno05212
rno05213	Endometrial cancer	Human Diseases	Cancer: specific types	2	444	57	7679	0.850132	1	0.606844	Ctnna3;Egf	rno05213
rno05214	Glioma	Human Diseases	Cancer: specific types	1	444	71	7679	0.985717	1	0.243592	Egf	rno05214
rno05215	Prostate cancer	Human Diseases	Cancer: specific types	3	444	96	7679	0.922173	1	0.54047	Ar;Creb5;Egf	rno05215
rno05216	Thyroid cancer	Human Diseases	Cancer: specific types	1	444	37	7679	0.890192	1	0.467434	Rxrg	rno05216
rno05217	Basal cell carcinoma	Human Diseases	Cancer: specific types	6	444	60	7679	0.131492	0.424218	1.7295	Fzd3;Fzd4;Hhip;Wnt10b;Wnt11;Wnt2b	rno05217
rno05218	Melanoma	Human Diseases	Cancer: specific types	2	444	72	7679	0.926534	1	0.480418	Egf;Fgf1	rno05218
rno05219	Bladder cancer	Human Diseases	Cancer: specific types	1	444	40	7679	0.908243	1	0.432376	Egf	rno05219
rno05221	Acute myeloid leukemia	Human Diseases	Cancer: specific types	1	444	66	7679	0.980709	1	0.262046	Runx1t1	rno05221
rno05222	Small cell lung cancer	Human Diseases	Cancer: specific types	4	444	91	7679	0.779916	1	0.760222	Col4a3;Col4a6;Lamc3;Rxrg	rno05222
rno05223	Non-small cell lung cancer	Human Diseases	Cancer: specific types	3	444	66	7679	0.743575	1	0.786138	Alk;Egf;Rxrg	rno05223
rno05224	Breast cancer	Human Diseases	Cancer: specific types	8	444	145	7679	0.606411	1	0.954209	Egf;Fgf1;Frat1;Fzd3;Fzd4;Wnt10b;Wnt11;Wnt2b	rno05224
rno05225	Hepatocellular carcinoma	Human Diseases	Cancer: specific types	9	444	169	7679	0.649422	1	0.921038	Dpf3;Frat1;Fzd3;Fzd4;Gstm7;Smarcd3;Wnt10b;Wnt11;Wnt2b	rno05225
rno05226	Gastric cancer	Human Diseases	Cancer: specific types	11	444	147	7679	0.22986	0.58766	1.29419	Abcb1a;Ctnna3;Egf;Fgf1;Frat1;Fzd3;Fzd4;Rxrg;Wnt10b;Wnt11;Wnt2b	rno05226
rno05230	Central carbon metabolism in cancer	Human Diseases	Cancer: overview	1	444	61	7679	0.973952	1	0.283525	Ntrk3	rno05230
rno05231	Choline metabolism in cancer	Human Diseases	Cancer: overview	8	444	97	7679	0.197554	0.539165	1.4264	Chka;Dgkb;Dgkg;Dgki;Egf;Slc22a2;Slc22a3;Slc22a5	rno05231
rno05320	Autoimmune thyroid disease	Human Diseases	Immune disease	2	444	60	7679	0.869655	1	0.576502	Tshb;Tshr	rno05320
rno05321	Inflammatiory bowel disease (IBD)	Human Diseases	Immune disease	1	444	59	7679	0.970628	1	0.293136	Il12a	rno05321
rno05322	Systemic lupus erythematosus	Human Diseases	Immune disease	2	444	91	7679	0.97149	1	0.380111	C6;C7	rno05322
rno05323	Rheumatoid arthritis	Human Diseases	Immune disease	3	444	81	7679	0.855438	1	0.640557	Angpt1;Atp6v1b1;Atp6v1g2	rno05323
rno05330	Allograft rejection	Human Diseases	Immune disease	1	444	53	7679	0.957899	1	0.326322	Il12a	rno05330
rno05340	Primary immunodeficiency	Human Diseases	Immune disease	2	444	36	7679	0.624611	1	0.960836	Rag2;Rfxapl1	rno05340
rno05410	Hypertrophic cardiomyopathy (HCM)	Human Diseases	Cardiovascular disease	14	444	86	7679	0.000371474	0.0052984	2.81547	Cacna1d;Cacna2d3;Cacnb2;Cacnb4;Itga11;Myh6;Prkaa2;Prkab2;Prkag2;Prkag3;Sgca;Sgcd;Slc8a1;Tnnt2	rno05410
rno05412	Arrhythmogenic right ventricular cardiomyopathy (ARVC)	Human Diseases	Cardiovascular disease	9	444	72	7679	0.0221926	0.126521	2.16188	Cacna1d;Cacna2d3;Cacnb2;Cacnb4;Ctnna3;Itga11;Sgca;Sgcd;Slc8a1	rno05412
rno05414	Dilated cardiomyopathy (DCM)	Human Diseases	Cardiovascular disease	14	444	88	7679	0.000473529	0.00611078	2.75148	Adcy1;Adcy5;Adcy9;Cacna1d;Cacna2d3;Cacnb2;Cacnb4;Itga11;Myh6;Pln;Sgca;Sgcd;Slc8a1;Tnnt2	rno05414
rno05416	Viral myocarditis	Human Diseases	Cardiovascular disease	3	444	73	7679	0.802458	1	0.710755	Myh6;Sgca;Sgcd	rno05416
rno05418	Fluid shear stress and atherosclerosis	Human Diseases	Cardiovascular disease	6	444	141	7679	0.832887	1	0.735959	Acvr2b;Gstm7;Map2k6;Prkaa2;Sdc2;Thbd	rno05418

## Sheet: down-regulated(SSCI–3 vs. sham)
id	Term	Classification_level1	Classification_level2	ListHits	ListTotal	PopHits	PopTotal	p-value	q-value	Enrichment_score	Gene	hyperlink_only_excel
rno00010	Glycolysis / Gluconeogenesis	Metabolism	Carbohydrate metabolism	2	235	64	7679	0.587875	1	1.02114	Adh1;Eno2	rno00010
rno00061	Fatty acid biosynthesis	Metabolism	Lipid metabolism	2	235	13	7679	0.0582661	0.391564	5.02717	Acacb;Acsl6	rno00061
rno00071	Fatty acid degradation	Metabolism	Lipid metabolism	3	235	44	7679	0.150828	0.674254	2.22795	Acsl6;Adh1;Cyp4a1	rno00071
rno00140	Steroid hormone biosynthesis	Metabolism	Lipid metabolism	2	235	75	7679	0.674144	1	0.871376	Cyp2d4;Cyp3a18	rno00140
rno00190	Oxidative phosphorylation	Metabolism	Energy metabolism	1	235	119	7679	0.975954	1	0.274593	Atp6v1g2	rno00190
rno00230	Purine metabolism	Metabolism	Nucleotide metabolism	3	235	169	7679	0.895423	1	0.580058	Entpd1;Gucy1a3;Pde1b	rno00230
rno00240	Pyrimidine metabolism	Metabolism	Nucleotide metabolism	1	235	96	7679	0.950346	1	0.340381	Entpd1	rno00240
rno00250	Alanine, aspartate and glutamate metabolism	Metabolism	Amino acid metabolism	1	235	35	7679	0.66388	1	0.933617	Folh1	rno00250
rno00260	Glycine, serine and threonine metabolism	Metabolism	Amino acid metabolism	2	235	38	7679	0.324951	0.953796	1.71982	Maob;Psat1	rno00260
rno00270	Cysteine and methionine metabolism	Metabolism	Amino acid metabolism	1	235	45	7679	0.754075	1	0.726147	Cdo1	rno00270
rno00280	Valine, leucine and isoleucine degradation	Metabolism	Amino acid metabolism	1	235	53	7679	0.808522	1	0.61654	Aox3	rno00280
rno00310	Lysine degradation	Metabolism	Amino acid metabolism	2	235	54	7679	0.495796	1	1.21024	Bbox1;Colgalt2	rno00310
rno00330	Arginine and proline metabolism	Metabolism	Amino acid metabolism	4	235	48	7679	0.058318	0.391564	2.72305	Aldh18a1;Ckm;Maob;Pycr1	rno00330
rno00340	Histidine metabolism	Metabolism	Amino acid metabolism	1	235	23	7679	0.51125	1	1.42072	Maob	rno00340
rno00350	Tyrosine metabolism	Metabolism	Amino acid metabolism	4	235	38	7679	0.0279527	0.31064	3.43964	Adh1;Aox3;Ddc;Maob	rno00350
rno00360	Phenylalanine metabolism	Metabolism	Amino acid metabolism	2	235	20	7679	0.123646	0.645709	3.26766	Ddc;Maob	rno00360
rno00380	Tryptophan metabolism	Metabolism	Amino acid metabolism	4	235	45	7679	0.047887	0.364984	2.90459	Aox3;Ddc;Inmt;Maob	rno00380
rno00430	Taurine and hypotaurine metabolism	Metabolism	Metabolism of other amino acids	1	235	11	7679	0.289735	0.907884	2.9706	Cdo1	rno00430
rno00450	Selenocompound metabolism	Metabolism	Metabolism of other amino acids	1	235	17	7679	0.410769	0.975025	1.92215	Inmt	rno00450
rno00480	Glutathione metabolism	Metabolism	Metabolism of other amino acids	2	235	58	7679	0.534162	1	1.12678	Gstm7;Nat8f3	rno00480
rno00510	N-Glycan biosynthesis	Metabolism	Glycan biosynthesis and metabolism	1	235	48	7679	0.776097	1	0.680762	St6gal2	rno00510
rno00512	Mucin type O-glycan biosynthesis	Metabolism	Glycan biosynthesis and metabolism	1	235	27	7679	0.568563	1	1.21024	Galnt5	rno00512
rno00514	Other types of O-glycan biosynthesis	Metabolism	Glycan biosynthesis and metabolism	2	235	22	7679	0.144591	0.672137	2.9706	Colgalt2;St6gal2	rno00514
rno00520	Amino sugar and nucleotide sugar metabolism	Metabolism	Carbohydrate metabolism	1	235	47	7679	0.768984	1	0.695247	Cmah	rno00520
rno00533	Glycosaminoglycan biosynthesis - keratan sulfate	Metabolism	Glycan biosynthesis and metabolism	1	235	14	7679	0.353064	0.954081	2.33404	Chst1	rno00533
rno00534	Glycosaminoglycan biosynthesis - heparan sulfate / heparin	Metabolism	Glycan biosynthesis and metabolism	1	235	25	7679	0.540796	1	1.30706	Ndst4	rno00534
rno00561	Glycerolipid metabolism	Metabolism	Lipid metabolism	1	235	61	7679	0.850955	1	0.535682	Lpl	rno00561
rno00562	Inositol phosphate metabolism	Metabolism	Carbohydrate metabolism	1	235	73	7679	0.897694	1	0.447625	Inpp5j	rno00562
rno00564	Glycerophospholipid metabolism	Metabolism	Lipid metabolism	2	235	96	7679	0.797919	1	0.680762	Pla2g2a;Pla2g5	rno00564
rno00565	Ether lipid metabolism	Metabolism	Lipid metabolism	4	235	45	7679	0.047887	0.364984	2.90459	Enpp2;Pla2g2a;Pla2g5;Ugt8	rno00565
rno00590	Arachidonic acid metabolism	Metabolism	Lipid metabolism	3	235	77	7679	0.420755	0.978984	1.27311	Cyp4a1;Pla2g2a;Pla2g5	rno00590
rno00591	Linoleic acid metabolism	Metabolism	Lipid metabolism	3	235	39	7679	0.115901	0.63341	2.51358	Cyp3a18;Pla2g2a;Pla2g5	rno00591
rno00592	alpha-Linolenic acid metabolism	Metabolism	Lipid metabolism	2	235	23	7679	0.155323	0.674254	2.84144	Pla2g2a;Pla2g5	rno00592
rno00600	Sphingolipid metabolism	Metabolism	Lipid metabolism	3	235	49	7679	0.188614	0.751258	2.00061	Cers4;Enpp7;Ugt8	rno00600
rno00601	Glycosphingolipid biosynthesis - lacto and neolacto series	Metabolism	Glycan biosynthesis and metabolism	1	235	29	7679	0.594657	1	1.12678	Fut2	rno00601
rno00603	Glycosphingolipid biosynthesis - globo and isoglobo series	Metabolism	Glycan biosynthesis and metabolism	1	235	15	7679	0.372899	0.954081	2.17844	Fut2	rno00603
rno00604	Glycosphingolipid biosynthesis - ganglio series	Metabolism	Glycan biosynthesis and metabolism	1	235	15	7679	0.372899	0.954081	2.17844	St6galnac3	rno00604
rno00620	Pyruvate metabolism	Metabolism	Carbohydrate metabolism	1	235	39	7679	0.703354	1	0.837861	Acacb	rno00620
rno00640	Propanoate metabolism	Metabolism	Carbohydrate metabolism	2	235	31	7679	0.244985	0.855062	2.10817	Acacb;Acss3	rno00640
rno00670	One carbon pool by folate	Metabolism	Metabolism of cofactors and vitamins	1	235	18	7679	0.428841	0.988016	1.81537	Aldh1l2	rno00670
rno00730	Thiamine metabolism	Metabolism	Metabolism of cofactors and vitamins	1	235	15	7679	0.372899	0.954081	2.17844	Alpp	rno00730
rno00750	Vitamin B6 metabolism	Metabolism	Metabolism of cofactors and vitamins	2	235	10	7679	0.0356906	0.31064	6.53532	Aox3;Psat1	rno00750
rno00760	Nicotinate and nicotinamide metabolism	Metabolism	Metabolism of cofactors and vitamins	2	235	32	7679	0.256434	0.860296	2.04229	Aox3;Nmnat2	rno00760
rno00770	Pantothenate and CoA biosynthesis	Metabolism	Metabolism of cofactors and vitamins	1	235	19	7679	0.446361	0.998999	1.71982	Vnn3	rno00770
rno00790	Folate biosynthesis	Metabolism	Metabolism of cofactors and vitamins	1	235	26	7679	0.554895	1	1.25679	Alpp	rno00790
rno00830	Retinol metabolism	Metabolism	Metabolism of cofactors and vitamins	6	235	80	7679	0.0353376	0.31064	2.45074	Adh1;Aox3;Cyp26b1;Cyp3a18;Cyp4a1;Lrat	rno00830
rno00980	Metabolism of xenobiotics by cytochrome P450	Metabolism	Xenobiotics biodegradation and metabolism	3	235	64	7679	0.311834	0.953796	1.53172	Adh1;Cyp2f4;Gstm7	rno00980
rno00982	Drug metabolism - cytochrome P450	Metabolism	Xenobiotics biodegradation and metabolism	5	235	65	7679	0.0481468	0.364984	2.51358	Adh1;Aox3;Fmo1;Gstm7;Maob	rno00982
rno00983	Drug metabolism - other enzymes	Metabolism	Xenobiotics biodegradation and metabolism	3	235	83	7679	0.469266	1	1.18108	Ces1d;Ces1f;Gstm7	rno00983
rno01040	Biosynthesis of unsaturated fatty acids	Metabolism	Lipid metabolism	1	235	26	7679	0.554895	1	1.25679	Scd	rno01040
rno01522	Endocrine resistance	Human Diseases	Drug resistance: antineoplastic	3	235	93	7679	0.545739	1	1.05408	Cdkn2a;Esr1;Fos	rno01522
rno01523	Antifolate resistance	Human Diseases	Drug resistance: antineoplastic	1	235	30	7679	0.607109	1	1.08922	Abcg2	rno01523
rno01524	Platinum drug resistance	Human Diseases	Drug resistance: antineoplastic	3	235	76	7679	0.41252	0.975025	1.28987	Cdkn2a;Gstm7;Top2a	rno01524
rno02010	ABC transporters	Environmental Information Processing	Membrane transport	6	235	47	7679	0.00289329	0.0971318	4.17148	Abca6;Abca8a;Abcb1a;Abcc6;Abcd2;Abcg2	rno02010
rno03018	RNA degradation	Genetic Information Processing	Folding, sorting and degradation	1	235	80	7679	0.917879	1	0.408457	Eno2	rno03018
rno03030	DNA replication	Genetic Information Processing	Replication and repair	1	235	34	7679	0.653221	1	0.961076	Mcm5	rno03030
rno03040	Spliceosome	Genetic Information Processing	Transcription	1	235	129	7679	0.982469	1	0.253307	RGD1563496	rno03040
rno03320	PPAR signaling pathway	Organismal Systems	Endocrine system	6	235	79	7679	0.0335099	0.31064	2.48177	Acsl6;Cyp4a1;Lpl;Rxrg;Scd;Slc27a6	rno03320
rno03460	Fanconi anemia pathway	Genetic Information Processing	Replication and repair	1	235	49	7679	0.782993	1	0.666869	Rmi2	rno03460
rno04010	MAPK signaling pathway	Environmental Information Processing	Signal transduction	13	235	288	7679	0.103543	0.579346	1.47499	Cacna1b;Cacna1i;Efna2;Fgf10;Fgfr4;Fos;Igf2;Ngfr;Nr4a1;Ntrk2;Pak2;Ppp3r2;Rasgrf2	rno04010
rno04012	ErbB signaling pathway	Environmental Information Processing	Signal transduction	1	235	85	7679	0.929819	1	0.384431	Pak2	rno04012
rno04014	Ras signaling pathway	Environmental Information Processing	Signal transduction	10	235	227	7679	0.157804	0.674254	1.4395	Efna2;Fgf10;Fgfr4;Igf2;Ngfr;Ntrk2;Pak2;Pla2g2a;Pla2g5;Rasgrf2	rno04014
rno04015	Rap1 signaling pathway	Environmental Information Processing	Signal transduction	4	235	205	7679	0.87888	1	0.637592	Efna2;Fgf10;Fgfr4;Ngfr	rno04015
rno04020	Calcium signaling pathway	Environmental Information Processing	Signal transduction	17	235	182	7679	3.87425e-05	0.00455225	3.05221	Adra1a;Agtr1a;Agtr1b;Atp2a3;Cacna1b;Cacna1i;Camk4;Gna14;Hrh2;Ntsr1;Oxtr;Pde1b;Ppp3r2;Ptgfr;Slc8a3;Tacr2;Tacr3	rno04020
rno04022	cGMP - PKG signaling pathway	Environmental Information Processing	Signal transduction	10	235	164	7679	0.0287636	0.31064	1.99248	Adra1a;Agtr1a;Agtr1b;Atp1a2;Atp1b2;Atp2a3;Gucy1a3;Ppp3r2;Rgs2;Slc8a3	rno04022
rno04024	cAMP signaling pathway	Environmental Information Processing	Signal transduction	10	235	194	7679	0.0738937	0.445615	1.68436	Atp1a2;Atp1b2;Camk4;Fos;Gria2;Gria4;Grin3a;Oxtr;Sox9;Sstr1	rno04024
rno04060	Cytokine-cytokine receptor interaction	Environmental Information Processing	Signaling molecules and interaction	10	235	240	7679	0.200222	0.769486	1.36152	Ccl11;Ccl19;Ccl21;Cntfr;Cxcl12;Eda;Il9r;Ngfr;Prlr;Tnfsf13b	rno04060
rno04062	Chemokine signaling pathway	Organismal Systems	Immune system	5	235	172	7679	0.610105	1	0.949901	Ccl11;Ccl19;Ccl21;Cxcl12;Grk3	rno04062
rno04064	NF-kappa B signaling pathway	Environmental Information Processing	Signal transduction	4	235	89	7679	0.28975	0.907884	1.46861	Ccl19;Ccl21;Cxcl12;Tnfsf13b	rno04064
rno04066	HIF-1 signaling pathway	Environmental Information Processing	Signal transduction	1	235	99	7679	0.954822	1	0.330067	Eno2	rno04066
rno04068	FoxO signaling pathway	Environmental Information Processing	Signal transduction	2	235	130	7679	0.912077	1	0.502717	Ccnd2;Foxo6	rno04068
rno04070	Phosphatidylinositol signaling system	Environmental Information Processing	Signal transduction	1	235	97	7679	0.951885	1	0.336872	Inpp5j	rno04070
rno04071	Sphingolipid signaling pathway	Environmental Information Processing	Signal transduction	1	235	119	7679	0.975954	1	0.274593	Cers4	rno04071
rno04072	Phospholipase D signaling pathway	Environmental Information Processing	Signal transduction	4	235	146	7679	0.658559	1	0.895249	Agtr1a;Agtr1b;Grm3;Ptgfr	rno04072
rno04080	Neuroactive ligand-receptor interaction	Environmental Information Processing	Signaling molecules and interaction	30	235	313	7679	2.01132e-08	4.72659e-06	3.13194	Adra1a;Agtr1a;Agtr1b;Agtr2;Chrna5;Gabra3;Gabrb2;Glrb;Gria2;Gria4;Grid2;Grik2;Grin3a;Grm3;Hrh2;Ltb4r;Mchr1;Nmbr;Nmur2;Npffr2;Ntsr1;Oxtr;P2ry14;Prlr;Ptgfr;Rxfp1;Sstr1;Tacr2;Tacr3;Tshb	rno04080
rno04110	Cell cycle	Cellular Processes	Cell growth and death	4	235	123	7679	0.522846	1	1.06265	Bub1b;Ccnd2;Cdkn2a;Mcm5	rno04110
rno04114	Oocyte meiosis	Cellular Processes	Cell growth and death	2	235	112	7679	0.862367	1	0.583511	Ar;Ppp3r2	rno04114
rno04115	p53 signaling pathway	Cellular Processes	Cell growth and death	4	235	66	7679	0.142856	0.672137	1.9804	Adgrb1;Ccnd2;Cdkn2a;Igfbp3	rno04115
rno04142	Lysosome	Cellular Processes	Transport and catabolism	1	235	125	7679	0.980106	1	0.261413	Ap3b2	rno04142
rno04144	Endocytosis	Cellular Processes	Transport and catabolism	2	235	256	7679	0.997139	1	0.255286	Fgfr4;Grk3	rno04144
rno04145	Phagosome	Cellular Processes	Transport and catabolism	7	235	169	7679	0.259919	0.860296	1.35347	Atp6v1g2;Cd209e;Cd209f;Clec7a;Fcgr2a;Thbs3;Tubb6	rno04145
rno04146	Peroxisome	Cellular Processes	Transport and catabolism	2	235	81	7679	0.714711	1	0.80683	Abcd2;Acsl6	rno04146
rno04150	mTOR signaling pathway	Environmental Information Processing	Signal transduction	2	235	150	7679	0.947415	1	0.435688	Atp6v1g2;Wnt2b	rno04150
rno04151	PI3K-Akt signaling pathway	Environmental Information Processing	Signal transduction	12	235	335	7679	0.328755	0.953796	1.1705	Ccnd2;Col1a1;Col6a5;Efna2;Fgf10;Fgfr4;Igf2;Ngfr;Nr4a1;Ntrk2;Prlr;Thbs3	rno04151
rno04152	AMPK signaling pathway	Environmental Information Processing	Signal transduction	3	235	123	7679	0.732083	1	0.79699	Acacb;Adra1a;Scd	rno04152
rno04210	Apoptosis	Cellular Processes	Cell growth and death	2	235	134	7679	0.920568	1	0.48771	Fos;Hrk	rno04210
rno04211	Longevity regulating pathway - mammal	Organismal Systems	Aging	1	235	89	7679	0.938112	1	0.367153	Camk4	rno04211
rno04215	Apoptosis - multiple species	Cellular Processes	Cell growth and death	1	235	32	7679	0.630881	1	1.02114	Ngfr	rno04215
rno04216	Ferroptosis	Cellular Processes	Cell growth and death	1	235	39	7679	0.703354	1	0.837861	Acsl6	rno04216
rno04218	Cellular senescence	Cellular Processes	Cell growth and death	4	235	173	7679	0.781519	1	0.755528	Ccnd2;Cdkn2a;Igfbp3;Ppp3r2	rno04218
rno04260	Cardiac muscle contraction	Organismal Systems	Circulatory system	3	235	75	7679	0.40425	0.975025	1.30706	Atp1a2;Atp1b2;Myh6	rno04260
rno04261	Adrenergic signaling in cardiomyocytes	Organismal Systems	Circulatory system	9	235	143	7679	0.0310931	0.31064	2.05657	Adra1a;Agtr1a;Agtr1b;Agtr2;Atp1a2;Atp1b2;Myh6;Ppp1r1a;Scn7a	rno04261
rno04270	Vascular smooth muscle contraction	Organismal Systems	Circulatory system	7	235	130	7679	0.103386	0.579346	1.75951	Adra1a;Agtr1a;Agtr1b;Cyp4a1;Gucy1a3;Pla2g2a;Pla2g5	rno04270
rno04310	Wnt signaling pathway	Environmental Information Processing	Signal transduction	5	235	143	7679	0.446002	0.998999	1.14254	Ccnd2;Ppp3r2;Sfrp2;Sfrp5;Wnt2b	rno04310
rno04340	Hedgehog signaling pathway	Environmental Information Processing	Signal transduction	3	235	43	7679	0.14359	0.672137	2.27976	Ccnd2;Dhh;Grk3	rno04340
rno04350	TGF-beta signaling pathway	Environmental Information Processing	Signal transduction	2	235	84	7679	0.733363	1	0.778014	Fst;Gdf7	rno04350
rno04360	Axon guidance	Organismal Systems	Development and regeneration	11	235	175	7679	0.0183222	0.31064	2.05396	Cxcl12;Efna2;Efnb3;Epha3;Gdf7;Lrrc4c;Pak2;Plxnb3;Ppp3r2;Sema5a;Unc5d	rno04360
rno04370	VEGF signaling pathway	Environmental Information Processing	Signal transduction	1	235	57	7679	0.83106	1	0.573274	Ppp3r2	rno04370
rno04371	Apelin signaling pathway	Environmental Information Processing	Signal transduction	5	235	134	7679	0.391258	0.975025	1.21928	Agtr1a;Agtr1b;Camk4;Egr1;Slc8a3	rno04371
rno04380	Osteoclast differentiation	Organismal Systems	Development and regeneration	5	235	122	7679	0.317971	0.953796	1.3392	Camk4;Fcgr2a;Fos;Lilra5;Ppp3r2	rno04380
rno04390	Hippo signaling pathway	Environmental Information Processing	Signal transduction	4	235	152	7679	0.689378	1	0.85991	Ccnd2;Dlg2;Gdf7;Wnt2b	rno04390
rno04392	Hippo signaling pathway - multiple species	Environmental Information Processing	Signal transduction	1	235	28	7679	0.581813	1	1.16702	Rassf4	rno04392
rno04510	Focal adhesion	Cellular Processes	Cellular community - eukaryotes	5	235	196	7679	0.7223	1	0.833587	Ccnd2;Col1a1;Col6a5;Pak2;Thbs3	rno04510
rno04512	ECM-receptor interaction	Environmental Information Processing	Signaling molecules and interaction	3	235	82	7679	0.461299	1	1.19549	Col1a1;Col6a5;Thbs3	rno04512
rno04514	Cell adhesion molecules (CAMs)	Environmental Information Processing	Signaling molecules and interaction	10	235	155	7679	0.0203667	0.31064	2.10817	Cadm3;Cdh4;Cldn1;Cntn1;Lrrc4b;Lrrc4c;Mpz;Ncam2;Negr1;Vtcn1	rno04514
rno04520	Adherens junction	Cellular Processes	Cellular community - eukaryotes	1	235	71	7679	0.891068	1	0.460234	Wasf3	rno04520
rno04530	Tight junction	Cellular Processes	Cellular community - eukaryotes	3	235	165	7679	0.885948	1	0.59412	Actr3b;Cldn1;Dlg2	rno04530
rno04540	Gap junction	Cellular Processes	Cellular community - eukaryotes	2	235	86	7679	0.745216	1	0.759921	Gucy1a3;Tubb6	rno04540
rno04550	Signaling pathways regulating pluripotency of stem cells	Cellular Processes	Cellular community - eukaryotes	2	235	135	7679	0.922568	1	0.484098	Fgfr4;Wnt2b	rno04550
rno04610	Complement and coagulation cascades	Organismal Systems	Immune system	4	235	80	7679	0.228916	0.838592	1.63383	C6;C7;Cfb;F13a1	rno04610
rno04611	Platelet activation	Organismal Systems	Immune system	2	235	124	7679	0.897741	1	0.527042	Col1a1;Gucy1a3	rno04611
rno04614	Renin-angiotensin system	Organismal Systems	Endocrine system	4	235	35	7679	0.0212809	0.31064	3.73447	Agtr1a;Agtr1b;Agtr2;Klk1c6	rno04614
rno04620	Toll-like receptor signaling pathway	Organismal Systems	Immune system	1	235	91	7679	0.941886	1	0.359083	Fos	rno04620
rno04621	NOD-like receptor signaling pathway	Organismal Systems	Immune system	2	235	154	7679	0.952636	1	0.424371	Mefv;Nod2	rno04621
rno04625	C-type lectin receptor signaling pathway	Organismal Systems	Immune system	5	235	108	7679	0.235387	0.838592	1.51281	Cd209e;Cd209f;Clec7a;Egr3;Ppp3r2	rno04625
rno04630	Jak-STAT signaling pathway	Environmental Information Processing	Signal transduction	7	235	151	7679	0.179999	0.751258	1.51481	Aox3;Ccnd2;Cntfr;Gfap;Il13ra2;Il9r;Prlr	rno04630
rno04640	Hematopoietic cell lineage	Organismal Systems	Immune system	2	235	87	7679	0.750972	1	0.751186	Cd7;Il9r	rno04640
rno04650	Natural killer cell mediated cytotoxicity	Organismal Systems	Immune system	2	235	125	7679	0.900272	1	0.522826	Fcgr2a;Ppp3r2	rno04650
rno04657	IL-17 signaling pathway	Organismal Systems	Immune system	2	235	91	7679	0.772892	1	0.718167	Ccl11;Fos	rno04657
rno04658	Th1 and Th2 cell differentiation	Organismal Systems	Immune system	2	235	88	7679	0.756616	1	0.74265	Fos;Ppp3r2	rno04658
rno04659	Th17 cell differentiation	Organismal Systems	Immune system	3	235	102	7679	0.60881	1	0.961076	Fos;Ppp3r2;Rxrg	rno04659
rno04660	T cell receptor signaling pathway	Organismal Systems	Immune system	4	235	101	7679	0.373513	0.954081	1.29412	Fos;Grap2;Pak2;Ppp3r2	rno04660
rno04662	B cell receptor signaling pathway	Organismal Systems	Immune system	2	235	70	7679	0.636879	1	0.933617	Fos;Ppp3r2	rno04662
rno04666	Fc gamma R-mediated phagocytosis	Organismal Systems	Immune system	2	235	85	7679	0.739346	1	0.768861	Fcgr2a;Wasf3	rno04666
rno04668	TNF signaling pathway	Environmental Information Processing	Signal transduction	2	235	106	7679	0.840768	1	0.61654	Fos;Nod2	rno04668
rno04670	Leukocyte transendothelial migration	Organismal Systems	Immune system	2	235	113	7679	0.865695	1	0.578347	Cldn1;Cxcl12	rno04670
rno04672	Intestinal immune network for IgA production	Organismal Systems	Immune system	2	235	42	7679	0.369785	0.954081	1.55603	Cxcl12;Tnfsf13b	rno04672
rno04713	Circadian entrainment	Organismal Systems	Environmental adaptation	7	235	96	7679	0.0273785	0.31064	2.38267	Cacna1i;Fos;Gria2;Gria4;Gucy1a3;Kcnj3;Rasd1	rno04713
rno04714	Thermogenesis	Organismal Systems	Environmental adaptation	1	235	214	7679	0.998825	1	0.152694	Acsl6	rno04714
rno04720	Long-term potentiation	Organismal Systems	Nervous system	4	235	66	7679	0.142856	0.672137	1.9804	Camk4;Gria2;Ppp1r1a;Ppp3r2	rno04720
rno04721	Synaptic vesicle cycle	Organismal Systems	Nervous system	4	235	62	7679	0.121108	0.645709	2.10817	Atp6v1g2;Cacna1b;Cplx1;Syt1	rno04721
rno04722	Neurotrophin signaling pathway	Organismal Systems	Nervous system	3	235	119	7679	0.711216	1	0.82378	Camk4;Ngfr;Ntrk2	rno04722
rno04723	Retrograde endocannabinoid signaling	Organismal Systems	Nervous system	6	235	138	7679	0.247422	0.855062	1.42072	Cacna1b;Gabra3;Gabrb2;Gria2;Gria4;Kcnj3	rno04723
rno04724	Glutamatergic synapse	Organismal Systems	Nervous system	9	235	112	7679	0.00719444	0.211337	2.6258	Gria2;Gria4;Grik2;Grin3a;Grk3;Grm3;Kcnj3;Ppp3r2;Slc38a3	rno04724
rno04725	Cholinergic synapse	Organismal Systems	Nervous system	5	235	111	7679	0.252603	0.860296	1.47192	Cacna1b;Camk4;Fos;Kcnj3;Kcnq4	rno04725
rno04726	Serotonergic synapse	Organismal Systems	Nervous system	6	235	119	7679	0.157167	0.674254	1.64756	Cacna1b;Cyp2d4;Ddc;Gabrb2;Kcnj3;Maob	rno04726
rno04727	GABAergic synapse	Organismal Systems	Nervous system	6	235	87	7679	0.0499264	0.366647	2.25356	Cacna1b;Gabra3;Gabrb2;Slc38a3;Slc38a5;Slc6a1	rno04727
rno04728	Dopaminergic synapse	Organismal Systems	Nervous system	7	235	129	7679	0.100277	0.579346	1.77315	Cacna1b;Ddc;Fos;Gria2;Gria4;Kcnj3;Maob	rno04728
rno04730	Long-term depression	Organismal Systems	Nervous system	3	235	60	7679	0.278162	0.895452	1.63383	Gria2;Grid2;Gucy1a3	rno04730
rno04740	Olfactory transduction	Organismal Systems	Sensory system	4	235	1088	7679	1	1	0.120135	Grk3;Pde1b;Rgs2;Slc8a3	rno04740
rno04742	Taste transduction	Organismal Systems	Sensory system	4	235	86	7679	0.269164	0.878521	1.51984	Asic2;Gabra3;Pde1b;Scn9a	rno04742
rno04744	Phototransduction	Organismal Systems	Sensory system	1	235	26	7679	0.554895	1	1.25679	Rgs9	rno04744
rno04750	Inflammatory mediator regulation of TRP channels	Organismal Systems	Sensory system	4	235	111	7679	0.442906	0.998999	1.17753	Asic2;Asic4;Cyp4a1;Trpv3	rno04750
rno04810	Regulation of actin cytoskeleton	Cellular Processes	Cell motility	4	235	208	7679	0.885729	1	0.628396	Fgf10;Fgfr4;Iqgap2;Pak2	rno04810
rno04910	Insulin signaling pathway	Organismal Systems	Endocrine system	2	235	134	7679	0.920568	1	0.48771	Acacb;Exoc7	rno04910
rno04911	Insulin secretion	Organismal Systems	Endocrine system	2	235	85	7679	0.739346	1	0.768861	Atp1a2;Atp1b2	rno04911
rno04915	Estrogen signaling pathway	Organismal Systems	Endocrine system	8	235	130	7679	0.0456497	0.364984	2.01087	Esr1;Fos;Ka11;Kcnj3;Krt14;Krt15;Krt17;Krt20	rno04915
rno04916	Melanogenesis	Organismal Systems	Endocrine system	1	235	98	7679	0.953376	1	0.333435	Wnt2b	rno04916
rno04917	Prolactin signaling pathway	Organismal Systems	Endocrine system	5	235	72	7679	0.0689123	0.445615	2.26921	Ccnd2;Elf5;Esr1;Fos;Prlr	rno04917
rno04918	Thyroid hormone synthesis	Organismal Systems	Endocrine system	6	235	72	7679	0.022426	0.31064	2.72305	Asgr1;Asgr2;Atp1a2;Atp1b2;Slc5a5;Tshb	rno04918
rno04919	Thyroid hormone signaling pathway	Organismal Systems	Endocrine system	8	235	117	7679	0.0267401	0.31064	2.2343	Atp1a2;Atp1b2;Dio2;Esr1;Med12l;Myh6;Rxrg;Slc16a10	rno04919
rno04920	Adipocytokine signaling pathway	Organismal Systems	Endocrine system	3	235	71	7679	0.370873	0.954081	1.3807	Acacb;Acsl6;Rxrg	rno04920
rno04921	Oxytocin signaling pathway	Organismal Systems	Endocrine system	7	235	152	7679	0.18414	0.751258	1.50484	Camk4;Fos;Gucy1a3;Kcnj3;Oxtr;Ppp3r2;Rgs2	rno04921
rno04922	Glucagon signaling pathway	Organismal Systems	Endocrine system	2	235	100	7679	0.816157	1	0.653532	Acacb;Ppp3r2	rno04922
rno04923	Regulation of lipolysis in adipocyte	Organismal Systems	Endocrine system	1	235	55	7679	0.820142	1	0.59412	Tshb	rno04923
rno04924	Renin secretion	Organismal Systems	Endocrine system	6	235	68	7679	0.0173643	0.31064	2.88323	Agtr1a;Agtr1b;Clca2;Gucy1a3;Pde1b;Ppp3r2	rno04924
rno04925	Aldosterone synthesis and secretion	Organismal Systems	Endocrine system	7	235	94	7679	0.0247358	0.31064	2.43336	Agtr1a;Agtr1b;Atp1a2;Atp1b2;Cacna1i;Camk4;Nr4a1	rno04925
rno04926	Relaxin signaling pathway	Organismal Systems	Endocrine system	3	235	126	7679	0.746945	1	0.778014	Col1a1;Fos;Rxfp1	rno04926
rno04927	Cortisol synthesis and secretion	Organismal Systems	Endocrine system	4	235	63	7679	0.126403	0.645755	2.0747	Agtr1a;Agtr1b;Cacna1i;Nr4a1	rno04927
rno04930	Type II diabetes mellitus	Human Diseases	Endocrine and metabolic disease	1	235	47	7679	0.768984	1	0.695247	Cacna1b	rno04930
rno04931	Insulin resistance	Human Diseases	Endocrine and metabolic disease	2	235	108	7679	0.848287	1	0.605122	Acacb;Slc27a6	rno04931
rno04933	AGE-RAGE signaling pathway in diabetic complications	Human Diseases	Endocrine and metabolic disease	4	235	99	7679	0.359502	0.954081	1.32027	Agtr1a;Agtr1b;Col1a1;Egr1	rno04933
rno04934	Cushing's syndrome	Human Diseases	Endocrine and metabolic disease	7	235	153	7679	0.18832	0.751258	1.49501	Agtr1a;Agtr1b;Cacna1i;Cdkn2a;Nr4a1;Rasd1;Wnt2b	rno04934
rno04950	Maturity onset diabetes of the young	Human Diseases	Endocrine and metabolic disease	2	235	27	7679	0.199532	0.769486	2.42049	Iapp;Nr5a2	rno04950
rno04960	Aldosterone-regulated sodium reabsorption	Organismal Systems	Excretory system	2	235	38	7679	0.324951	0.953796	1.71982	Atp1a2;Atp1b2	rno04960
rno04961	Endocrine and other factor-regulated calcium reabsorption	Organismal Systems	Excretory system	4	235	52	7679	0.0739531	0.445615	2.51358	Atp1a2;Atp1b2;Esr1;Klk1c6	rno04961
rno04964	Proximal tubule bicarbonate reclamation	Organismal Systems	Excretory system	3	235	22	7679	0.0283652	0.31064	4.4559	Atp1a2;Atp1b2;Slc38a3	rno04964
rno04966	Collecting duct acid secretion	Organismal Systems	Excretory system	1	235	27	7679	0.568563	1	1.21024	Atp6v1g2	rno04966
rno04970	Salivary secretion	Organismal Systems	Digestive system	4	235	76	7679	0.203013	0.769486	1.71982	Adra1a;Atp1a2;Atp1b2;Gucy1a3	rno04970
rno04971	Gastric acid secretion	Organismal Systems	Digestive system	3	235	74	7679	0.395948	0.975025	1.32473	Atp1a2;Atp1b2;Hrh2	rno04971
rno04972	Pancreatic secretion	Organismal Systems	Digestive system	7	235	98	7679	0.0302072	0.31064	2.33404	Atp1a2;Atp1b2;Atp2a3;Cela3b;Clca2;Pla2g2a;Pla2g5	rno04972
rno04973	Carbohydrate digestion and absorption	Organismal Systems	Digestive system	2	235	39	7679	0.336251	0.954081	1.67572	Atp1a2;Atp1b2	rno04973
rno04974	Protein digestion and absorption	Organismal Systems	Digestive system	10	235	87	7679	0.000301114	0.0176904	3.75593	Atp1a2;Atp1b2;Cela3b;Col1a1;Col6a5;Col7a1;Slc16a10;Slc7a8;Slc8a3;Xpnpep2	rno04974
rno04975	Fat digestion and absorption	Organismal Systems	Digestive system	2	235	40	7679	0.347495	0.954081	1.63383	Pla2g2a;Pla2g5	rno04975
rno04976	Bile secretion	Organismal Systems	Digestive system	6	235	71	7679	0.0210775	0.31064	2.7614	Abcb1a;Abcg2;Atp1a2;Atp1b2;Nr1h4;Slco1a2	rno04976
rno04977	Vitamin digestion and absorption	Organismal Systems	Digestive system	3	235	24	7679	0.035658	0.31064	4.08457	Cubn;Folh1;Lrat	rno04977
rno04978	Mineral absorption	Organismal Systems	Digestive system	2	235	43	7679	0.380819	0.962286	1.51984	Atp1a2;Atp1b2	rno04978
rno04979	Cholesterol metabolism	Organismal Systems	Digestive system	1	235	49	7679	0.782993	1	0.666869	Lpl	rno04979
rno05010	Alzheimer's disease	Human Diseases	Neurodegenerative disease	4	235	164	7679	0.744995	1	0.79699	Atp2a3;Lpl;Ppp3r2;Snca	rno05010
rno05012	Parkinson's disease	Human Diseases	Neurodegenerative disease	2	235	127	7679	0.905161	1	0.514592	Snca;Sncaip	rno05012
rno05014	Amyotrophic lateral sclerosis (ALS)	Human Diseases	Neurodegenerative disease	3	235	53	7679	0.220393	0.822103	1.84962	Gria2;Nefl;Ppp3r2	rno05014
rno05016	Huntington's disease	Human Diseases	Neurodegenerative disease	1	235	181	7679	0.996633	1	0.180534	Dnah10	rno05016
rno05020	Prion diseases	Human Diseases	Neurodegenerative disease	4	235	34	7679	0.0192994	0.31064	3.84431	C6;C7;Egr1;Ncam2	rno05020
rno05030	Cocaine addiction	Human Diseases	Substance dependence	6	235	47	7679	0.00289329	0.0971318	4.17148	Ddc;Gria2;Grin3a;Grm3;Maob;Rgs9	rno05030
rno05031	Amphetamine addiction	Human Diseases	Substance dependence	9	235	66	7679	0.000163316	0.012793	4.4559	Arc;Camk4;Ddc;Fos;Gria2;Gria4;Grin3a;Maob;Ppp3r2	rno05031
rno05032	Morphine addiction	Human Diseases	Substance dependence	6	235	90	7679	0.0571622	0.391564	2.17844	Cacna1b;Gabra3;Gabrb2;Grk3;Kcnj3;Pde1b	rno05032
rno05033	Nicotine addiction	Human Diseases	Substance dependence	6	235	40	7679	0.00123585	0.0580852	4.90149	Cacna1b;Gabra3;Gabrb2;Gria2;Gria4;Grin3a	rno05033
rno05034	Alcoholism	Human Diseases	Substance dependence	8	235	143	7679	0.07174	0.445615	1.82806	Camk4;Ddc;Grin3a;Hist1h3a;Hist3h2ba;Maob;Ntrk2;Slc29a1	rno05034
rno05132	Salmonella infection	Human Diseases	Infectious disease: bacterial	1	235	80	7679	0.917879	1	0.408457	Fos	rno05132
rno05133	Pertussis	Human Diseases	Infectious disease: bacterial	1	235	72	7679	0.894433	1	0.453842	Fos	rno05133
rno05140	Leishmaniasis	Human Diseases	Infectious disease: parasitic	2	235	65	7679	0.59637	1	1.00543	Fcgr2a;Fos	rno05140
rno05142	Chagas disease (American trypanosomiasis)	Human Diseases	Infectious disease: parasitic	2	235	101	7679	0.820482	1	0.647061	Fos;Gna14	rno05142
rno05144	Malaria	Human Diseases	Infectious disease: parasitic	1	235	52	7679	0.802435	1	0.628396	Thbs3	rno05144
rno05146	Amoebiasis	Human Diseases	Infectious disease: parasitic	2	235	96	7679	0.797919	1	0.680762	Col1a1;Gna14	rno05146
rno05150	Staphylococcus aureus infection	Human Diseases	Infectious disease: bacterial	2	235	46	7679	0.413409	0.975025	1.42072	Cfb;Fcgr2a	rno05150
rno05152	Tuberculosis	Human Diseases	Infectious disease: bacterial	6	235	169	7679	0.414904	0.975025	1.16012	Cd209e;Cd209f;Clec7a;Fcgr2a;Nod2;Ppp3r2	rno05152
rno05160	Hepatitis C	Human Diseases	Infectious disease: viral	1	235	122	7679	0.978128	1	0.267841	Cldn1	rno05160
rno05161	Hepatitis B	Human Diseases	Infectious disease: viral	2	235	134	7679	0.920568	1	0.48771	Egr3;Fos	rno05161
rno05162	Measles	Human Diseases	Infectious disease: viral	3	235	125	7679	0.742065	1	0.784238	Ccnd2;Cd209e;Cd209f	rno05162
rno05165	Human papillomavirus infection	Human Diseases	Infectious disease: viral	6	235	327	7679	0.940018	1	0.599571	Ccnd2;Col1a1;Col6a5;Dlg2;Thbs3;Wnt2b	rno05165
rno05166	HTLV-I infection	Human Diseases	Infectious disease: viral	8	235	269	7679	0.584497	1	0.971795	Atf3;Bub1b;Ccnd2;Cdkn2a;Egr1;Fos;Ppp3r2;Wnt2b	rno05166
rno05167	Kaposi's sarcoma-associated herpesvirus infection	Human Diseases	Infectious disease: viral	2	235	194	7679	0.983786	1	0.336872	Fos;Ppp3r2	rno05167
rno05168	Herpes simplex infection	Human Diseases	Infectious disease: viral	1	235	190	7679	0.997472	1	0.171982	Fos	rno05168
rno05169	Epstein-Barr virus infection	Human Diseases	Infectious disease: viral	1	235	204	7679	0.998383	1	0.160179	Entpd1	rno05169
rno05200	Pathways in cancer	Human Diseases	Cancer: overview	15	235	508	7679	0.596686	1	0.96486	Agtr1a;Agtr1b;Alk;Ar;Ccnd2;Cdkn2a;Cxcl12;Esr1;Fgf10;Fgfr4;Fos;Gstm7;Igf2;Rxrg;Wnt2b	rno05200
rno05202	Transcriptional misregulation in cancers	Human Diseases	Cancer: overview	5	235	168	7679	0.589092	1	0.972518	Ccnd2;Hist1h3a;Igfbp3;Ngfr;Rxrg	rno05202
rno05203	Viral carcinogenesis	Human Diseases	Cancer: overview	4	235	201	7679	0.8692	1	0.650281	Ccnd2;Cdkn2a;Egr3;Hist3h2ba	rno05203
rno05204	Chemical carcinogenesis	Human Diseases	Cancer: overview	3	235	85	7679	0.485039	1	1.15329	Adh1;Cyp3a18;Gstm7	rno05204
rno05205	Proteoglycans in cancer	Human Diseases	Cancer: overview	4	235	198	7679	0.861513	1	0.660133	Esr1;Igf2;Lum;Wnt2b	rno05205
rno05206	MicroRNAs in cancer	Human Diseases	Cancer: overview	4	235	141	7679	0.631363	1	0.926996	Abcb1a;Ccnd2;Cdkn2a;Igf2bp1	rno05206
rno05210	Colorectal cancer	Human Diseases	Cancer: specific types	1	235	86	7679	0.93199	1	0.37996	Fos	rno05210
rno05211	Renal cell carcinoma	Human Diseases	Cancer: specific types	1	235	66	7679	0.872573	1	0.4951	Pak2	rno05211
rno05212	Pancreatic cancer	Human Diseases	Cancer: specific types	1	235	74	7679	0.900855	1	0.441576	Cdkn2a	rno05212
rno05214	Glioma	Human Diseases	Cancer: specific types	1	235	71	7679	0.891068	1	0.460234	Cdkn2a	rno05214
rno05215	Prostate cancer	Human Diseases	Cancer: specific types	1	235	96	7679	0.950346	1	0.340381	Ar	rno05215
rno05216	Thyroid cancer	Human Diseases	Cancer: specific types	1	235	37	7679	0.684231	1	0.883151	Rxrg	rno05216
rno05217	Basal cell carcinoma	Human Diseases	Cancer: specific types	1	235	60	7679	0.846211	1	0.54461	Wnt2b	rno05217
rno05218	Melanoma	Human Diseases	Cancer: specific types	2	235	72	7679	0.65217	1	0.907683	Cdkn2a;Fgf10	rno05218
rno05219	Bladder cancer	Human Diseases	Cancer: specific types	1	235	40	7679	0.712478	1	0.816915	Cdkn2a	rno05219
rno05220	Chronic myeloid leukemia	Human Diseases	Cancer: specific types	1	235	77	7679	0.909766	1	0.424371	Cdkn2a	rno05220
rno05222	Small cell lung cancer	Human Diseases	Cancer: specific types	1	235	91	7679	0.941886	1	0.359083	Rxrg	rno05222
rno05223	Non-small cell lung cancer	Human Diseases	Cancer: specific types	3	235	66	7679	0.328729	0.953796	1.4853	Alk;Cdkn2a;Rxrg	rno05223
rno05224	Breast cancer	Human Diseases	Cancer: specific types	4	235	145	7679	0.653229	1	0.901423	Esr1;Fgf10;Fos;Wnt2b	rno05224
rno05225	Hepatocellular carcinoma	Human Diseases	Cancer: specific types	4	235	169	7679	0.765824	1	0.773411	Cdkn2a;Gstm7;Igf2;Wnt2b	rno05225
rno05226	Gastric cancer	Human Diseases	Cancer: specific types	4	235	147	7679	0.663834	1	0.889159	Abcb1a;Fgf10;Rxrg;Wnt2b	rno05226
rno05231	Choline metabolism in cancer	Human Diseases	Cancer: overview	4	235	97	7679	0.345486	0.954081	1.34749	Fos;Slc22a2;Slc22a3;Wasf3	rno05231
rno05310	Asthma	Human Diseases	Immune disease	1	235	24	7679	0.526253	1	1.36152	Ccl11	rno05310
rno05320	Autoimmune thyroid disease	Human Diseases	Immune disease	1	235	60	7679	0.846211	1	0.54461	Tshb	rno05320
rno05321	Inflammatiory bowel disease (IBD)	Human Diseases	Immune disease	1	235	59	7679	0.841317	1	0.553841	Nod2	rno05321
rno05322	Systemic lupus erythematosus	Human Diseases	Immune disease	5	235	91	7679	0.145868	0.672137	1.79542	C6;C7;Fcgr2a;Hist1h3a;Hist3h2ba	rno05322
rno05323	Rheumatoid arthritis	Human Diseases	Immune disease	4	235	81	7679	0.235519	0.838592	1.61366	Atp6v1g2;Cxcl12;Fos;Tnfsf13b	rno05323
rno05410	Hypertrophic cardiomyopathy (HCM)	Human Diseases	Cardiovascular disease	1	235	86	7679	0.93199	1	0.37996	Myh6	rno05410
rno05414	Dilated cardiomyopathy (DCM)	Human Diseases	Cardiovascular disease	1	235	88	7679	0.936135	1	0.371325	Myh6	rno05414
rno05416	Viral myocarditis	Human Diseases	Cardiovascular disease	1	235	73	7679	0.897694	1	0.447625	Myh6	rno05416
rno05418	Fluid shear stress and atherosclerosis	Human Diseases	Cardiovascular disease	2	235	141	7679	0.933605	1	0.463498	Fos;Gstm7	rno05418
