# Supplementary material for: Expression profiles of circular RNAs and interaction networks of competing endogenous RNAs in neurogenic bladder of rats following suprasacral spinal cord injury
Source: PeerJ. 2023 Sep 18;11:e16042. doi: 10.7717/peerj.16042 (PMC10512963; doi:10.7717/peerj.16042)
Supplement: Table S1 [file peerj-11-16042-s001.xlsx]

## Sheet: Table S1 genome mapping
Sample	Total reads	Total mapped reads	Uniquely mapped	Read-1	Read-2	Reads map to '+'	Reads map to '-'	Non-splice reads	Splice reads	Reads mapped in proper pairs	Proper-paired reads map to different chrom
Sham–1	134879996	126887882(94.07%)	84334552(62.53%)	42553330(31.55%)	41781222(30.98%)	42118496(31.23%)	42216056(31.30%)	65158282(48.31%)	19176270(14.22%)	81905188(60.72%)	0(0.00%)
Sham–2	140310356	132019125(94.09%)	87751931(62.54%)	44267194(31.55%)	43484737(30.99%)	43821669(31.23%)	43930262(31.31%)	67715172(48.26%)	20036759(14.28%)	85356614(60.83%)	0(0.00%)
Sham–3	141499082	132777881(93.84%)	88332826(62.43%)	44445055(31.41%)	43887771(31.02%)	44122623(31.18%)	44210203(31.24%)	67397907(47.63%)	20934919(14.80%)	86414238(61.07%)	0(0.00%)
SSCI 1–1	147227288	137961971(93.71%)	91757423(62.32%)	46204548(31.38%)	45552875(30.94%)	45829313(31.13%)	45928110(31.20%)	64108406(43.54%)	27649017(18.78%)	89806068(61.00%)	0(0.00%)
SSCI 1–2	137444654	128568134(93.54%)	85501360(62.21%)	43066774(31.33%)	42434586(30.87%)	42696289(31.06%)	42805071(31.14%)	59561792(43.34%)	25939568(18.87%)	83599396(60.82%)	0(0.00%)
SSCI 1–3	158647257	148724172(93.75%)	98927138(62.36%)	49797034(31.39%)	49130104(30.97%)	49406036(31.14%)	49521102(31.21%)	69125933(43.57%)	29801205(18.78%)	96855804(61.05%)	0(0.00%)
SSCI 2–1	143814062	136019884(94.58%)	90407784(62.86%)	45612100(31.72%)	44795684(31.15%)	45154601(31.40%)	45253183(31.47%)	68200040(47.42%)	22207744(15.44%)	88250986(61.36%)	0(0.00%)
SSCI 2–2	160847812	151411516(94.13%)	100678817(62.59%)	50732699(31.54%)	49946118(31.05%)	50280786(31.26%)	50398031(31.33%)	73122500(45.46%)	27556317(17.13%)	98385262(61.17%)	0(0.00%)
SSCI 2–3	163293551	154199887(94.43%)	102575447(62.82%)	51624440(31.61%)	50951007(31.20%)	51239304(31.38%)	51336143(31.44%)	76290427(46.72%)	26285020(16.10%)	100406818(61.49%)	0(0.00%)
SSCI 3–1	131623489	124428149(94.53%)	82729636(62.85%)	41698513(31.68%)	41031123(31.17%)	41313424(31.39%)	41416212(31.47%)	62976414(47.85%)	19753222(15.01%)	80448160(61.12%)	0(0.00%)
SSCI 3–2	132894845	125769811(94.64%)	83577772(62.89%)	42192039(31.75%)	41385733(31.14%)	41740127(31.41%)	41837645(31.48%)	65104686(48.99%)	18473086(13.90%)	81151558(61.06%)	0(0.00%)
SSCI 3–3	141348711	133936615(94.76%)	88976602(62.95%)	44960013(31.81%)	44016589(31.14%)	44421566(31.43%)	44555036(31.52%)	68645020(48.56%)	20331582(14.38%)	86046090(60.88%)	0(0.00%)
