# Supplementary material for: Expression profiles of circular RNAs and interaction networks of competing endogenous RNAs in neurogenic bladder of rats following suprasacral spinal cord injury
Source: PeerJ. 2023 Sep 18;11:e16042. doi: 10.7717/peerj.16042 (PMC10512963; doi:10.7717/peerj.16042)
Supplement: Table S2 [file peerj-11-16042-s002.xlsx]

## Sheet: Filtered_data_stat
Sample	RawReads	RawBases	CleanReads	CleanBases	ValidBases	Q30	GC
Sham–1	99079790	14861968500	97615220	14642283000	0.9852	0.9263	0.48
Sham–2	102854584	15428187600	101412742	15211911300	0.986	0.9279	0.4797
Sham–3	103765862	15564879300	102000192	15300028800	0.983	0.9366	0.4797
SSCI 1–1	108037986	16205697900	106002782	15900417300	0.9812	0.9376	0.4875
SSCI 1–2	104324692	15648703800	99084194	14862629100	0.9498	0.9338	0.4904
SSCI 1–3	130374280	19556142000	114175398	17126309700	0.8758	0.937	0.4879
SSCI 2–1	126599882	18989982300	103590056	15538508400	0.8182	0.9357	0.4784
SSCI 2–2	132779424	19916913600	116025344	17403801600	0.8738	0.9367	0.4839
SSCI 2–3	126260772	18939115800	117695264	17654289600	0.9322	0.9397	0.4826
SSCI 3–1	95826712	14374006800	94864830	14229724500	0.99	0.9286	0.4775
SSCI 3–2	96931150	14539672500	95925014	14388752100	0.9896	0.9263	0.4753
SSCI 3–3	103194658	15479198700	102118606	15317790900	0.9896	0.9214	0.4766
